# Supplementary material for: LncRNAs induce oxidative stress and spermatogenesis by regulating endoplasmic reticulum genes and pathways
Source: Aging (Albany NY). 2021 May 6;13(10):13764–87. doi: 10.18632/aging.202971 (PMC8202879; doi:10.18632/aging.202971)
Supplement: Supplementary Table 1 [file aging-13-202971-s001.csv]

Supplementary Table 1. DEG_lncrna.
GeneID	logFC	AveExpr	t	P.Value	adj.P.Val	B	Symbol	Symbol_new
lnc-GNS-3	10.09212171	3.965659395	45.3019705	1.44E-12	2.91E-08	15.01998663	-	-
XLOC_515910	8.866827469	4.265249565	40.26742452	4.46E-12	2.91E-08	14.6436474	-	-
lnc-SERHL2-7	10.29479218	4.150186371	39.51646188	5.34E-12	2.91E-08	14.88094439	-	-
lnc-IL31RA-1	9.212770486	3.608284567	38.7338906	6.47E-12	2.91E-08	14.78511831	-	-
lnc-NLRP2-2	7.527131283	3.427583161	38.2414579	7.31E-12	2.91E-08	14.21558467	-	-
lnc-CDK12-2	9.474259578	3.74509398	38.10823878	7.56E-12	2.91E-08	14.71520459	-	-
XLOC_1093926	7.48579482	2.681629159	37.90461851	7.96E-12	2.91E-08	14.11569245	-	-
lnc-LRRC38-2	8.591818801	3.909872547	37.72634013	8.33E-12	2.91E-08	14.53769879	-	-
lnc-FOXN1-1	8.900890166	3.970903945	37.59779517	8.60E-12	2.91E-08	13.88418465	-	-
lnc-SLC46A2-1	9.376133724	4.463232485	37.47005235	8.89E-12	2.91E-08	14.70133948	-	-
lnc-CSNK1A1-7	8.601429485	3.98033589	37.16957686	9.60E-12	2.91E-08	14.66812398	-	-
lnc-PHLDB1-1	8.974801908	3.482530985	37.15067051	9.65E-12	2.91E-08	14.62187397	-	-
lnc-KB-1980E6.3.1-6	7.757378045	3.07392831	36.8764725	1.04E-11	2.91E-08	14.09144918	-	-
lnc-LAT2-2	7.960869595	2.87678783	36.84881346	1.04E-11	2.91E-08	14.23894664	-	-
XLOC_2394941	8.509538914	3.086295998	36.1818071	1.24E-11	3.12E-08	14.07611093	-	-
lnc-EEF1B2-3	7.892955869	2.943197476	36.01266105	1.30E-11	3.12E-08	14.23763312	-	-
lnc-AP3S1-15	9.267482898	4.247473261	35.89689434	1.34E-11	3.12E-08	14.40464759	-	-
lnc-SLA2-1	6.812728704	3.105506873	35.05304655	1.68E-11	3.31E-08	13.94613198	-	-
lnc-RAPH1-6	6.822992646	2.385418776	34.89714008	1.76E-11	3.31E-08	14.1594047	-	-
lnc-TICAM1-1	8.925062418	3.485134155	34.86603031	1.77E-11	3.31E-08	14.33896084	-	-
lnc-FAT2-1	8.092533244	3.054287688	34.35848748	2.04E-11	3.31E-08	14.28268793	-	-
lnc-C11orf49-3	8.399513568	3.230181782	34.23616533	2.11E-11	3.31E-08	14.25442016	-	-
lnc-MMP15-1	8.248687746	3.1242108	34.12011886	2.18E-11	3.31E-08	14.25895614	-	-
lnc-DYNC1I1-5	9.1059749	3.558403174	34.02235572	2.24E-11	3.31E-08	14.26007338	-	-
lnc-MFSD9-4	8.86107524	3.441911447	33.87906323	2.33E-11	3.31E-08	14.2300724	-	-
lnc-DYSF-12	9.569458747	4.726387803	33.68955395	2.46E-11	3.31E-08	14.15061145	-	-
lnc-PTGER4-4	9.636158357	3.851007723	33.66231506	2.48E-11	3.31E-08	14.16667968	-	-
lnc-KIAA1429-6	7.752281385	2.919555748	33.2981961	2.76E-11	3.31E-08	14.0656092	-	-
lnc-MYL4-1	8.225846482	3.12028142	33.21358909	2.82E-11	3.31E-08	14.07262371	-	-
lnc-CCDC83-1	9.364252705	4.407682578	33.09403732	2.92E-11	3.31E-08	13.14037598	-	-
lnc-LRRN4-2	9.353759587	3.83938721	33.06584446	2.95E-11	3.31E-08	13.62118106	-	-
XLOC_376899	7.253046453	2.63786634	33.06536454	2.95E-11	3.31E-08	14.07489798	-	-
lnc-NFAT5-1	7.774259541	3.639626877	33.04886171	2.96E-11	3.31E-08	13.91135743	-	-
XLOC_1014483	7.127337438	3.141839024	33.04673742	2.96E-11	3.31E-08	13.51191616	-	-
lnc-PINK1-2	9.43157996	4.464247709	32.99749095	3.01E-11	3.31E-08	14.04270849	-	-
XLOC_1176066	8.576515713	3.985623124	32.92594231	3.07E-11	3.31E-08	13.98914135	-	-
XLOC_1174083	8.826130509	5.225651167	32.90185614	3.09E-11	3.31E-08	13.6814485	-	-
lnc-ADAMTS18-1	9.406338309	3.731774964	32.7558917	3.22E-11	3.36E-08	14.03586072	-	-
lnc-CHRNA9-2	9.885819988	4.907539843	32.51676129	3.46E-11	3.36E-08	13.96186594	-	-
XLOC_1230520	7.354410544	2.686538436	32.50286029	3.47E-11	3.36E-08	13.81181867	-	-
lnc-MDM4-8	7.101017763	3.091595746	32.39207265	3.59E-11	3.36E-08	13.70900396	-	-
lnc-WDR41-1	9.480453539	4.02981639	32.07829225	3.94E-11	3.41E-08	13.95484796	-	-
lnc-EEF1A1-1	7.885234478	2.891730691	31.27830202	5.01E-11	4.03E-08	13.63967572	-	-
lnc-PI4KA-2	8.214899697	2.993887181	31.276832	5.02E-11	4.03E-08	13.67191384	-	-
lnc-TUFM-1	7.671837529	4.595914106	30.92978441	5.58E-11	4.40E-08	12.94606893	-	-
lnc-TUBGCP4-1	6.851304034	3.242499126	30.61648174	6.15E-11	4.75E-08	13.77082195	-	-
lnc-MMP23B-3	8.210576769	3.772354451	30.5564799	6.27E-11	4.75E-08	13.61135928	-	-
XLOC_002818	6.94579172	3.382986523	30.51166082	6.36E-11	4.75E-08	13.58226432	-	-
lnc-ERP44-1	9.074117357	4.399838656	30.26998282	6.86E-11	5.03E-08	13.25686064	-	-
lnc-LEO1-4	7.380215952	2.612916762	30.15183974	7.12E-11	5.12E-08	13.30713158	-	-
lnc-CHADL-3	8.241615055	3.142486812	30.10604497	7.22E-11	5.12E-08	13.65331488	-	-
lnc-SAR1B-1	8.914211047	3.245566793	29.87276863	7.78E-11	5.42E-08	13.37144328	-	-
lnc-GPRC5D-1	5.989543518	2.730484598	29.63307643	8.41E-11	5.68E-08	13.51315231	-	-
RAP2C-AS1	8.023701011	3.804740522	29.56622769	8.59E-11	5.68E-08	13.58861282	-	-
lnc-UGP2-4	8.073739331	3.595225635	29.33955074	9.24E-11	5.68E-08	13.52290994	-	-
lnc-GLRX2-1	8.106142038	3.717139206	29.32591151	9.29E-11	5.68E-08	13.41384679	-	-
lnc-KIAA1731-1	7.405897898	3.4094055	29.26745295	9.46E-11	5.68E-08	13.4324455	-	-
lnc-ING1-3	8.679737108	4.081720209	29.09455011	1.00E-10	5.68E-08	13.32927957	-	-
lnc-IGFBP7-1	7.849654443	2.862405738	29.07756153	1.01E-10	5.68E-08	13.27410318	-	-
lnc-TRAPPC4-1	7.26272489	4.275990736	29.04250019	1.02E-10	5.68E-08	12.75343817	-	-
lnc-AMDHD1-3	8.59592812	4.141596408	29.04227728	1.02E-10	5.68E-08	13.45045993	-	-
CFLAR-AS1	8.201968397	3.4204793	29.03658086	1.02E-10	5.68E-08	13.45620113	-	-
lnc-FAM82A1-10	6.840420187	2.44830476	29.00416541	1.03E-10	5.68E-08	13.4020825	-	-
lnc-ATP6V1C2-4	7.413745577	2.699535979	28.83617497	1.09E-10	5.92E-08	13.42349187	-	-
lnc-LEPRE1-1	7.838151422	3.333203114	28.75981967	1.12E-10	6.00E-08	13.30090705	-	-
lnc-GTPBP1-1	7.479505189	2.694185473	28.63539779	1.17E-10	6.16E-08	13.1870717	-	-
lnc-ZNF445-4	8.105947922	3.72160352	28.60083819	1.18E-10	6.16E-08	13.33534539	-	-
lnc-SKA2-2	6.895875445	2.458773081	28.39881336	1.26E-10	6.52E-08	13.3355744	-	-
lnc-LPIN2-1	6.559377936	2.644806528	28.3289211	1.29E-10	6.59E-08	12.82809584	-	-
lnc-POLH-1	8.383150991	3.227599637	28.28931215	1.31E-10	6.60E-08	13.34113288	-	-
lnc-GADD45A-2	9.447016929	4.190588399	28.25172006	1.33E-10	6.60E-08	13.2240175	-	-
MYLK-AS1	6.842039961	3.133924265	28.21677316	1.34E-10	6.60E-08	13.16194495	-	-
XLOC_2218192	9.269596582	3.670286036	28.15307731	1.37E-10	6.64E-08	13.3010553	-	-
XLOC_1177405	7.186280729	2.623437171	28.12685975	1.38E-10	6.64E-08	13.29719063	-	-
lnc-C17orf63-2	7.755002311	4.451144882	28.09926543	1.40E-10	6.64E-08	12.74146389	-	-
lnc-AC006050.2.1-6	8.238731752	3.801385326	28.01163193	1.44E-10	6.68E-08	13.16318588	-	-
lnc-FAM102B-2	6.277639675	2.153718369	27.87450472	1.51E-10	6.78E-08	13.16243609	-	-
lnc-C14orf102-1	10.5740281	5.06489484	27.58539682	1.67E-10	7.33E-08	12.96050321	-	-
lnc-AC011443.1-4	8.412459817	4.757062226	27.47734849	1.73E-10	7.53E-08	12.8469078	-	-
XLOC_000300	7.447913347	3.422539241	27.33122108	1.82E-10	7.76E-08	13.14931479	-	-
lnc-MPI-1	9.744618404	4.69111135	27.24566557	1.87E-10	7.92E-08	13.1384226	-	-
lnc-RNF146-2	8.768908345	3.661770981	27.12330384	1.96E-10	8.02E-08	12.97547695	-	-
XLOC_1625085	8.858508323	3.475504581	26.88464599	2.13E-10	8.43E-08	13.05800211	-	-
XLOC_515249	7.239231169	2.640304511	26.87424385	2.14E-10	8.43E-08	13.0380569	-	-
lnc-ANGPT2-2	5.854293784	1.906831285	26.73445745	2.25E-10	8.74E-08	12.84406075	-	-
lnc-AMDHD1-2	8.18213836	3.614148971	26.71966622	2.26E-10	8.74E-08	13.00427264	-	-
lnc-RASAL1-1	7.083989847	3.60230839	26.66077684	2.30E-10	8.79E-08	13.00245879	-	-
lnc-AIDA-1	6.903185311	3.711123237	26.59941103	2.36E-10	8.82E-08	12.85020958	-	-
LYPLAL1-AS1	7.529101521	2.788031562	26.58928737	2.36E-10	8.82E-08	12.98062029	-	-
lnc-SH3RF2-1	8.460506667	3.922045689	26.52582875	2.42E-10	8.87E-08	12.95665842	-	-
lnc-TMEM194B-6	5.449869771	2.211077727	26.45074745	2.49E-10	8.94E-08	12.62305657	-	-
lnc-C3orf17-2	7.746317375	2.952565187	26.43497995	2.50E-10	8.94E-08	12.95736056	-	-
lnc-AP1S2-1	6.362290524	2.799869166	26.3943418	2.54E-10	8.94E-08	12.84149675	-	-
XLOC_379275	6.791741106	3.99930647	26.35047163	2.58E-10	8.98E-08	11.80922665	-	-
lnc-BRMS1L-7	7.439285246	2.742539183	26.24777488	2.67E-10	9.15E-08	12.87283803	-	-
lnc-NUDT5-1	8.315551217	3.9344947	26.21437791	2.71E-10	9.15E-08	12.77066016	-	-
XLOC_1176619	6.796934023	3.122183702	26.17286806	2.75E-10	9.15E-08	12.66538271	-	-
POTEH-AS1	7.937228811	2.994449433	26.1644452	2.76E-10	9.15E-08	12.89764462	-	-
lnc-SLC39A6-1	7.240635961	2.66385892	26.07387563	2.85E-10	9.38E-08	12.83104012	-	-
lnc-SLC25A47-2	8.636757009	4.231560314	25.94805458	2.98E-10	9.75E-08	12.77800992	-	-
lnc-PIGU-3	8.748469998	3.384960458	25.89298964	3.05E-10	9.85E-08	12.81105649	-	-
XLOC_2558149	5.304379236	12.21279963	25.87505736	3.07E-10	9.85E-08	12.71814576	-	-
lnc-RB1-2	6.711630215	2.380941208	25.85840792	3.08E-10	9.85E-08	12.81358111	-	-
lnc-OTP-5	8.760914038	3.899259109	25.82708227	3.12E-10	9.88E-08	12.71783413	-	-
lnc-SPTBN5-2	6.122805692	2.021987285	25.66752125	3.31E-10	1.03E-07	12.63012369	-	-
lnc-NDUFAF2-1	6.719689359	2.373284502	25.66446656	3.31E-10	1.03E-07	12.76467663	-	-
lnc-MPHOSPH10-2	7.505340524	3.464023912	25.54413023	3.46E-10	1.06E-07	12.75972651	-	-
lnc-ID4-2	6.219241286	2.559498605	25.51804784	3.50E-10	1.06E-07	12.2991739	-	-
lnc-NEK5-1	6.920645027	3.013770699	25.51215231	3.51E-10	1.06E-07	12.67788585	-	-
lnc-ZNF83-4	7.195818077	3.433592808	25.43107782	3.61E-10	1.08E-07	12.60777422	-	-
UBXN7-AS1	7.554147704	2.795479792	25.42343367	3.62E-10	1.08E-07	12.71869377	-	-
XLOC_847052	9.211826809	4.62476387	25.3850206	3.68E-10	1.08E-07	12.63041109	-	-
lnc-SLC25A29-1	9.389708167	5.437249143	25.33198098	3.75E-10	1.08E-07	12.53401749	-	-
lnc-CCDC152-2	8.408873883	3.17617796	25.32963624	3.75E-10	1.08E-07	12.70174447	-	-
lnc-TAF1A-1	7.437800015	3.306520471	25.26065394	3.85E-10	1.10E-07	12.427686	-	-
lnc-AF127577.1-3	6.979153826	2.422137181	24.91201608	4.40E-10	1.21E-07	12.50984547	-	-
XLOC_753553	7.222039412	3.484387858	24.82868544	4.54E-10	1.23E-07	12.42725609	-	-
lnc-BLNK-4	6.418955922	2.768053288	24.82330677	4.55E-10	1.23E-07	12.50003881	-	-
lnc-WDR81-2	8.154148286	4.274653434	24.79588155	4.60E-10	1.23E-07	12.40757352	-	-
lnc-ATP11B-6	6.451894163	2.073647114	24.78194633	4.62E-10	1.23E-07	12.3405421	-	-
lnc-LRRC1-5	8.687351335	3.791615807	24.77190789	4.64E-10	1.23E-07	12.51647405	-	-
lnc-MIXL1-2	7.920275732	3.481395792	24.69767495	4.78E-10	1.26E-07	12.55188834	-	-
lnc-USP50-1	7.570858669	3.409090118	24.63752552	4.89E-10	1.26E-07	12.52673172	-	-
lnc-SKIV2L2-1	9.106492867	3.965685546	24.60399216	4.95E-10	1.27E-07	12.38074241	-	-
lnc-IQCG-6	5.645078275	2.366393161	24.54349224	5.07E-10	1.28E-07	12.34937734	-	-
XLOC_516712	6.680272617	3.245967266	24.5239118	5.11E-10	1.28E-07	12.49441873	-	-
lnc-AC018816.3.1-11	7.395268299	3.241822985	24.365897	5.43E-10	1.34E-07	12.46908068	-	-
lnc-TESC-4	6.291097946	2.120992495	24.23523352	5.72E-10	1.39E-07	12.33174028	-	-
lnc-SPIN3-5	6.268734259	2.701447385	24.22844291	5.73E-10	1.39E-07	12.28184279	-	-
lnc-RIMS3-2	6.829074151	2.49993646	24.15594298	5.90E-10	1.41E-07	12.23344539	-	-
lnc-ANKS6-1	6.480106355	2.925898018	24.14970011	5.91E-10	1.41E-07	12.29902396	-	-
lnc-TRIP10-4	7.081732733	3.166894446	24.07520671	6.09E-10	1.45E-07	12.2473488	-	-
lnc-POC1B-GALNT4-2	6.240218338	2.10267279	24.04406719	6.16E-10	1.46E-07	12.27514333	-	-
lnc-THRSP-2	7.774576735	3.25584944	24.02764758	6.20E-10	1.46E-07	12.38075566	-	-
lnc-TUBGCP6-5	6.834144245	3.063650351	23.9359029	6.43E-10	1.49E-07	12.32757667	-	-
EVX1-AS	6.083568006	2.833143346	23.93549823	6.43E-10	1.49E-07	12.354619	-	-
lnc-ZNF613-7	7.084807942	3.720389148	23.9160817	6.48E-10	1.49E-07	12.12425989	-	-
lnc-SETD1B-3	7.334389379	3.639625364	23.90277276	6.52E-10	1.49E-07	12.30874542	-	-
lnc-PIGB-2	6.644397089	2.989621609	23.8446149	6.67E-10	1.50E-07	12.29101902	-	-
lnc-PAICS-2	6.87698025	1.957853504	23.79977984	6.79E-10	1.50E-07	12.23946544	-	-
lnc-PPP4C-8	6.917481344	4.323730332	23.79832312	6.79E-10	1.50E-07	11.94655126	-	-
lnc-MORC2-1	7.322203102	3.348270594	23.79054825	6.82E-10	1.50E-07	12.30437704	-	-
lnc-CHSY1-6	7.581660569	2.867136789	23.78337839	6.84E-10	1.50E-07	12.26653079	-	-
IDI2-AS1	9.844838971	4.757448615	23.78211692	6.84E-10	1.50E-07	12.1550534	-	-
lnc-ORC3-2	8.21270631	4.8371844	23.65309252	7.20E-10	1.55E-07	11.95128048	-	-
PITPNA-AS1	5.027540677	9.893269089	23.63982971	7.24E-10	1.55E-07	12.1765335	-	-
XLOC_375822	7.687315309	3.675075433	23.63146393	7.26E-10	1.55E-07	12.19668635	-	-
lnc-KLHL25-6	9.359004719	5.369150593	23.58399248	7.40E-10	1.56E-07	12.14365709	-	-
lnc-FAM210A-2	7.636130805	3.530779662	23.49101632	7.69E-10	1.59E-07	12.07397798	-	-
lnc-IQCG-2	7.240251518	3.351168782	23.48057652	7.72E-10	1.59E-07	12.19518263	-	-
lnc-CRHR1-5	9.590030489	4.708249475	23.45975846	7.79E-10	1.59E-07	12.09347679	-	-
lnc-ETNK2-7	7.744872176	2.822795971	23.39260554	8.00E-10	1.60E-07	12.19145168	-	-
lnc-SPERT-4	8.530498652	3.262728626	23.37206299	8.07E-10	1.60E-07	12.20122677	-	-
lnc-PSMB11-1	6.698871193	4.090814612	23.36850278	8.08E-10	1.60E-07	11.21661266	-	-
lnc-PSME4-2	5.933764549	2.004449171	23.35633532	8.12E-10	1.60E-07	12.13729318	-	-
ITGA9-AS1	-6.274290298	2.786209503	-23.35059812	8.14E-10	1.60E-07	11.83535822	-	-
lnc-CEMP1-10	9.904123877	5.573778313	23.34429377	8.16E-10	1.60E-07	12.11900443	-	-
XLOC_754873	5.870067389	3.333148897	23.3358094	8.19E-10	1.60E-07	12.13887094	-	-
lnc-HDLBP-3	6.446538873	3.344231173	23.33166758	8.20E-10	1.60E-07	11.8160959	-	-
lnc-KATNAL2-5	8.728074562	3.986958897	23.250503	8.48E-10	1.65E-07	12.17088445	-	-
lnc-AC127496.3-7	6.818176254	3.053756053	23.14053515	8.87E-10	1.72E-07	12.03822313	-	-
lnc-IL2RG-4	7.813825359	2.984141222	23.09045391	9.05E-10	1.73E-07	12.11135338	-	-
lnc-WDR67-1	6.456903306	2.646097595	23.08161511	9.08E-10	1.73E-07	11.91589417	-	-
lnc-POLR1E-4	6.940569684	3.327629995	23.06716019	9.14E-10	1.73E-07	12.10658988	-	-
lnc-ID2-1	7.042376251	3.330438705	22.92467025	9.69E-10	1.83E-07	11.87195909	-	-
lnc-PNMA2-1	8.623807678	4.595666839	22.91212856	9.74E-10	1.83E-07	12.0757012	-	-
lnc-ZNF775-1	6.304390493	2.699974998	22.87098777	9.91E-10	1.85E-07	12.06092307	-	-
lnc-SEC22C-2	6.105854895	2.402366591	22.84006727	1.00E-09	1.86E-07	11.89961722	-	-
lnc-DDX19B-2	7.091315064	3.562119284	22.83798015	1.00E-09	1.86E-07	12.00276176	-	-
XLOC_514233	7.541334263	3.190265809	22.79982287	1.02E-09	1.87E-07	12.03285125	-	-
lnc-TMEM123-1	10.7660531	5.134304299	22.79959343	1.02E-09	1.87E-07	11.90660758	-	-
lnc-LETM2-5	6.868448661	3.217512859	22.79510434	1.02E-09	1.87E-07	12.01504051	-	-
lnc-HMBOX1-8	7.919629969	3.674206533	22.78403689	1.03E-09	1.87E-07	12.02507616	-	-
lnc-TSPYL4-1	8.632904965	4.105447132	22.74034965	1.05E-09	1.89E-07	12.02534663	-	-
lnc-AC091132.1-3	7.47061458	3.285231462	22.7231393	1.05E-09	1.89E-07	11.96258869	-	-
XLOC_847185	8.606475517	3.786536917	22.71950565	1.06E-09	1.89E-07	11.95777731	-	-
lnc-C3orf24-1	6.735383896	3.242792317	22.67736029	1.07E-09	1.92E-07	11.93663912	-	-
lnc-ZNF257-5	5.987179033	2.902830413	22.6574599	1.08E-09	1.93E-07	11.99386667	-	-
lnc-B9D1-1	7.788128251	5.085926983	22.587417	1.12E-09	1.97E-07	11.88852344	-	-
lnc-VTCN1-3	5.336451477	3.141637702	22.57537355	1.12E-09	1.97E-07	11.43766595	-	-
lnc-TMEM150A-1	7.126911343	4.174039553	22.57184269	1.12E-09	1.97E-07	11.71891968	-	-
lnc-TTC26-4	6.769111228	2.877079536	22.55046006	1.13E-09	1.98E-07	11.9095949	-	-
lnc-VN1R2-3	7.798975727	3.639694759	22.5475652	1.13E-09	1.98E-07	11.96666565	-	-
lnc-KCTD4-1	6.747216215	3.33326344	22.50292972	1.16E-09	2.01E-07	11.94126763	-	-
lnc-DNAJA1-1	6.818358883	3.568061418	22.47021284	1.17E-09	2.02E-07	11.69217502	-	-
XLOC_2217833	7.351622951	2.726708954	22.46285926	1.18E-09	2.02E-07	11.94226219	-	-
XLOC_1017529	6.585691378	2.92971968	22.4609719	1.18E-09	2.02E-07	11.8782373	-	-
IDH1-AS1	5.892972719	2.620333961	22.41754306	1.20E-09	2.04E-07	11.87607976	-	-
XLOC_754819	8.681815109	4.156511713	22.41633976	1.20E-09	2.04E-07	11.78265569	-	-
lnc-MOCS2-3	6.324062886	2.970306812	22.39758487	1.21E-09	2.05E-07	11.92593488	-	-
lnc-GPLD1-1	7.945502044	4.042799604	22.38047224	1.22E-09	2.05E-07	11.8536821	-	-
lnc-APC-4	7.902487933	3.982771478	22.33164155	1.24E-09	2.07E-07	11.86709238	-	-
lnc-LOXL1-1	7.168441162	3.213339092	22.30857956	1.26E-09	2.08E-07	11.84898868	-	-
lnc-LMAN2-1	6.468990601	3.937596599	22.28295187	1.27E-09	2.09E-07	11.59979528	-	-
lnc-KIAA0319-1	7.039872248	6.050894098	22.22713331	1.30E-09	2.13E-07	11.32760328	-	-
lnc-TCP1-2	4.880502609	1.34223183	22.16870806	1.33E-09	2.17E-07	11.66403686	-	-
lnc-TNFRSF11B-2	7.829350625	2.954655975	22.11456515	1.36E-09	2.20E-07	11.78222574	-	-
lnc-LRRC57-1	9.039403681	5.20730977	22.10957482	1.37E-09	2.20E-07	11.7267751	-	-
lnc-TMEM138-4	7.965582214	3.056665732	22.08167715	1.38E-09	2.21E-07	11.8281173	-	-
lnc-TRMT2A-1	7.5440385	5.028128623	22.06899938	1.39E-09	2.21E-07	11.57251491	-	-
lnc-LXN-1	7.078778446	2.573216006	22.02991488	1.41E-09	2.24E-07	11.8123634	-	-
lnc-SHARPIN-4	7.68076297	4.265411748	22.01128357	1.43E-09	2.25E-07	11.62131932	-	-
lnc-KIAA0664-2	9.443892347	5.226294812	21.94094926	1.47E-09	2.28E-07	11.75568973	-	-
lnc-YIF1A-4	6.684993226	3.068906326	21.92555681	1.48E-09	2.29E-07	11.78230249	-	-
XLOC_1828067	5.132949942	2.737931825	21.81588129	1.55E-09	2.38E-07	11.25123677	-	-
lnc-RHOQ-2	6.899996166	2.481209611	21.75249292	1.59E-09	2.44E-07	11.72687273	-	-
lnc-UMODL1-7	6.185765534	2.868387525	21.65600109	1.66E-09	2.52E-07	11.63109538	-	-
lnc-SNRNP35-1	5.905215821	3.050685906	21.6344004	1.68E-09	2.53E-07	11.5948732	-	-
lnc-RFC4-1	9.57134745	4.760570136	21.58079373	1.72E-09	2.58E-07	11.59143297	-	-
lnc-FKBP2-1	6.383441979	2.210251888	21.55322995	1.74E-09	2.60E-07	11.66203853	-	-
lnc-TUSC5-5	9.00977354	6.009312597	21.51302847	1.77E-09	2.64E-07	11.58864819	-	-
lnc-C4orf21-1	8.169255893	3.741561892	21.47473036	1.80E-09	2.66E-07	11.62557361	-	-
lnc-ZBTB25-2	7.470587804	3.563067605	21.46884894	1.81E-09	2.66E-07	11.64021241	-	-
XLOC_1232514	7.198877147	3.282762702	21.46186574	1.81E-09	2.66E-07	11.61353812	-	-
CNOT10-AS1	6.921966296	2.516218876	21.45471436	1.82E-09	2.66E-07	11.63130302	-	-
CASC15	-7.619995334	3.418826246	-21.43409465	1.83E-09	2.66E-07	11.48752798	-	-
lnc-MFSD4-1	5.492782224	8.260674993	21.41517077	1.85E-09	2.67E-07	11.49943185	-	-
lnc-TIGD1L2-6	7.15274714	2.560907732	21.40837142	1.85E-09	2.67E-07	11.60992498	-	-
lnc-ODZ1-6	7.196036103	3.097339408	21.37909731	1.88E-09	2.69E-07	11.57723157	-	-
lnc-WDR45L-1	8.855565687	4.058969186	21.3662361	1.89E-09	2.69E-07	11.48325058	-	-
lnc-ZNF687-1	7.628529903	3.271506608	21.32174727	1.93E-09	2.73E-07	11.48988973	-	-
lnc-PPAP2A-1	7.899823364	2.953969824	21.30649738	1.94E-09	2.74E-07	11.58414664	-	-
lnc-PEAK1.1-5	7.101464883	2.571452856	21.29162818	1.95E-09	2.75E-07	11.57904476	-	-
MCCC1-AS1	6.398840674	2.915810194	21.23938813	2.00E-09	2.80E-07	11.56113781	-	-
lnc-GATAD2B-1	7.375099661	4.290258728	21.23264022	2.00E-09	2.80E-07	11.3398745	-	-
XLOC_1625271	7.554208134	3.125247742	21.20773944	2.03E-09	2.81E-07	11.55545186	-	-
lnc-MPEG1-2	6.383437459	3.004877178	21.20073183	2.03E-09	2.81E-07	11.54220441	-	-
lnc-SLC24A5-5	6.529044938	2.183278555	21.18882038	2.04E-09	2.81E-07	11.45732633	-	-
lnc-SIGLEC16-4	5.752491489	2.991919816	21.1392831	2.09E-09	2.84E-07	11.47913086	-	-
lnc-LEP-1	5.819583087	3.544230145	21.12572616	2.10E-09	2.85E-07	10.62354421	-	-
lnc-SNTG2-3	6.99131954	3.206665502	21.10127388	2.13E-09	2.87E-07	11.51929912	-	-
lnc-CHRNA3-5	7.829112996	3.780511034	21.09443385	2.13E-09	2.87E-07	11.51930053	-	-
lnc-ARL1-3	6.585326536	2.9118074	21.07132589	2.15E-09	2.89E-07	11.4995513	-	-
lnc-CREG1-2	5.295166521	2.460809644	21.058382	2.17E-09	2.90E-07	11.50760366	-	-
lnc-RP11-712L6.5.1-3	8.376818225	2.972019723	20.97577591	2.25E-09	3.00E-07	11.39551276	-	-
lnc-KRT80-10	6.84410175	2.812450292	20.96851855	2.26E-09	3.00E-07	11.45945799	-	-
lnc-TOMM20L-1	6.643188301	2.38253032	20.96221082	2.26E-09	3.00E-07	11.29240358	-	-
lnc-RP11-324D17.2.1-3	-6.998266472	2.546565209	-20.924113	2.30E-09	3.02E-07	11.46059947	-	-
lnc-MRPL47-2	7.790277701	3.563782289	20.91631572	2.31E-09	3.02E-07	11.44082411	-	-
lnc-CLVS1-1	-5.884486044	1.603278751	-20.87840273	2.35E-09	3.06E-07	11.20895762	-	-
lnc-C16orf58-5	5.554846461	2.411440187	20.86383563	2.37E-09	3.07E-07	11.37154581	-	-
lnc-C17orf48-1	6.830268058	3.538973176	20.84458398	2.39E-09	3.09E-07	11.42814329	-	-
lnc-SLC38A8-9	4.82840147	2.295150528	20.78800058	2.45E-09	3.16E-07	11.41795804	-	-
lnc-DLEU7-5	6.706497478	2.863866656	20.70151275	2.55E-09	3.28E-07	11.3836481	-	-
lnc-SP110-5	5.262370127	2.444068271	20.6611589	2.60E-09	3.31E-07	11.37506373	-	-
lnc-TMEM50B-3	8.367502	4.139487408	20.65745233	2.60E-09	3.31E-07	11.34454011	-	-
XLOC_1176366	5.53966219	2.694258967	20.65253228	2.61E-09	3.31E-07	11.33961747	-	-
lnc-TAOK3-9	4.531765402	11.54638446	20.64579953	2.61E-09	3.31E-07	10.70351698	-	-
lnc-RP11-116D17.1.1-10	8.371641915	3.231409932	20.6456456	2.61E-09	3.31E-07	11.36722222	-	-
lnc-OR7C2-1	6.91046656	3.275966988	20.60091378	2.67E-09	3.35E-07	11.33783525	-	-
lnc-HSP90AA1-1	9.870123897	5.780725198	20.56995062	2.71E-09	3.39E-07	11.22954036	-	-
lnc-FGFBP1-1	7.69698154	3.569745735	20.48539356	2.81E-09	3.50E-07	11.15184352	-	-
lnc-LIPG-2	8.598773525	4.357227196	20.45067469	2.86E-09	3.54E-07	11.23538315	-	-
lnc-ALPK2-6	6.396722921	2.266774431	20.44654801	2.86E-09	3.54E-07	11.27404423	-	-
lnc-PPIAL4C-9	5.560418003	2.367430813	20.40627117	2.92E-09	3.60E-07	11.28732926	-	-
lnc-S100A13-1	8.010297496	3.732899216	20.39581626	2.93E-09	3.61E-07	10.87642719	-	-
lnc-GLCCI1-1	8.360158366	3.934486572	20.37414721	2.96E-09	3.63E-07	11.10550949	-	-
lnc-CCDC68-1	10.32299356	6.627837143	20.37226631	2.96E-09	3.63E-07	11.21450454	-	-
XLOC_1174702	6.556178991	2.530952584	20.33981552	3.01E-09	3.63E-07	11.17237216	-	-
lnc-SEPT14-2	7.181522644	2.835558828	20.33151628	3.02E-09	3.63E-07	11.20385414	-	-
lnc-RFXAP-2	7.597177404	3.227173252	20.3314008	3.02E-09	3.63E-07	11.10908395	-	-
lnc-IKZF2-9	5.556659978	2.608676692	20.32160657	3.04E-09	3.63E-07	11.25452116	-	-
ARSD-AS1	6.772131456	2.396418492	20.31964439	3.04E-09	3.63E-07	11.25531753	-	-
lnc-ZFAND3-4	6.524518024	3.592534995	20.31870867	3.04E-09	3.63E-07	11.21765968	-	-
lnc-GLDN-3	5.947725284	2.389430725	20.29523929	3.07E-09	3.64E-07	11.0758698	-	-
lnc-ZNF45-2	5.505901731	1.745257774	20.29452759	3.07E-09	3.64E-07	11.17971939	-	-
lnc-MAP6-1	5.619122295	2.383599718	20.2911255	3.08E-09	3.64E-07	11.13633774	-	-
lnc-ESD-1	5.712355927	2.607142853	20.27717096	3.10E-09	3.65E-07	11.1934632	-	-
lnc-PHLPP2-1	5.404057815	3.120809893	20.24566968	3.14E-09	3.67E-07	10.62342974	-	-
lnc-AGMAT-4	6.047536462	2.819522494	20.19049802	3.23E-09	3.73E-07	11.21193623	-	-
lnc-NBPF15-2	6.457839346	2.842088745	20.18996886	3.23E-09	3.73E-07	11.0307357	-	-
lnc-ST3GAL1-1	5.539269751	1.805964836	20.18762258	3.23E-09	3.73E-07	11.1742079	-	-
PCBP1-AS1	4.698305106	9.377395303	20.16013647	3.27E-09	3.77E-07	11.12283547	-	-
lnc-CHAD-3	8.109158134	5.106686233	20.14750959	3.29E-09	3.78E-07	11.04077918	-	-
lnc-INTS12-2	6.233317749	2.941553702	20.14011913	3.30E-09	3.79E-07	11.16165601	-	-
lnc-IRF1-4	5.437950959	2.209908263	20.1203847	3.33E-09	3.80E-07	11.10736727	-	-
lnc-AARS-1	5.52410921	1.794533846	20.10106488	3.37E-09	3.81E-07	11.17200289	-	-
XLOC_1483332	8.266780178	3.809296799	20.05187025	3.44E-09	3.88E-07	11.16314105	-	-
lnc-ZNF738-5	7.263596517	3.570164413	19.96443951	3.59E-09	4.01E-07	11.13246511	-	-
lnc-DNAJA4-1	7.608316069	4.618628625	19.94719433	3.62E-09	4.03E-07	10.77264715	-	-
lnc-FAM198B-1	7.181235329	3.004493542	19.93835247	3.63E-09	4.03E-07	11.05140665	-	-
RNF157-AS1	5.332163762	1.376446673	19.92978583	3.65E-09	4.04E-07	10.95191894	-	-
lnc-KIAA0196-5	7.110417125	3.673741253	19.90080697	3.70E-09	4.07E-07	11.07608513	-	-
lnc-RPS4XP21-1	6.538344905	4.113895441	19.89216241	3.71E-09	4.07E-07	10.39317439	-	-
lnc-STAT1-1	6.909470038	2.463677391	19.89095322	3.72E-09	4.07E-07	11.04073169	-	-
lnc-PHYHIP-1	6.408216555	3.16901793	19.88487101	3.73E-09	4.07E-07	10.92741467	-	-
lnc-RNF121-5	4.928271311	2.331233198	19.8493392	3.79E-09	4.12E-07	11.02216293	-	-
lnc-PARN-10	4.795775364	3.00203122	19.832095	3.82E-09	4.14E-07	10.58078699	-	-
lnc-MANSC4-2	9.297945508	4.468368987	19.79030495	3.90E-09	4.20E-07	11.06069385	-	-
lnc-PPP1R26-1	6.353878917	2.271111118	19.75937415	3.96E-09	4.24E-07	11.03389373	-	-
lnc-LRSAM1-1	8.81878415	5.796590953	19.72915865	4.01E-09	4.28E-07	10.86086366	-	-
XLOC_1585064	6.607625542	2.907742676	19.72479762	4.02E-09	4.28E-07	10.9307949	-	-
lnc-ARL13A-1	5.359823386	2.230192794	19.70397251	4.06E-09	4.30E-07	10.95492728	-	-
lnc-C1orf201-3	8.812664452	8.672626912	19.68962082	4.09E-09	4.32E-07	10.54373035	-	-
lnc-C5orf39-3	7.192184592	3.334747031	19.65785698	4.15E-09	4.36E-07	10.97582636	-	-
XLOC_1174283	5.86408921	2.982925878	19.6374249	4.19E-09	4.40E-07	10.93770591	-	-
lnc-C14orf28-2	6.147836248	2.10654748	19.60449849	4.26E-09	4.46E-07	10.94094843	-	-
lnc-TMUB2-1	7.713823869	4.659194102	19.59215824	4.29E-09	4.47E-07	10.87336739	-	-
XLOC_1175795	5.697609433	2.786588238	19.49520425	4.49E-09	4.67E-07	10.96159955	-	-
lnc-AP3S1-4	7.124319379	3.076192867	19.4742712	4.54E-09	4.70E-07	10.93750899	-	-
lnc-TMEM41B-4	8.180424742	4.213473672	19.458237	4.57E-09	4.70E-07	10.90775698	-	-
lnc-OAZ3-6	7.977711699	2.982854709	19.45732651	4.58E-09	4.70E-07	10.94414272	-	-
XLOC_1623391	6.13813603	1.946044099	19.43600853	4.62E-09	4.70E-07	10.76843889	-	-
lnc-MFN1-1	7.514176528	1.846971561	19.43532135	4.62E-09	4.70E-07	10.68617114	-	-
lnc-STAG3L4-5	5.190395013	2.265885677	19.43419043	4.63E-09	4.70E-07	10.85970813	-	-
lnc-ORC3-1	7.054371494	4.117523335	19.41339327	4.67E-09	4.73E-07	10.84564511	-	-
XLOC_1176581	4.761459837	1.935964596	19.36969948	4.77E-09	4.81E-07	10.87545499	-	-
CASK-AS1	5.550601694	1.801748284	19.34328439	4.84E-09	4.86E-07	10.79441888	-	-
lnc-USP35-3	8.235795793	4.114147648	19.2794583	4.99E-09	4.99E-07	10.8554978	-	-
TAB3-AS2	6.396632384	2.221414887	19.23724148	5.09E-09	5.08E-07	10.85808842	-	-
lnc-PARP2-1	7.226943559	2.608084578	19.22335682	5.13E-09	5.10E-07	10.8400465	-	-
lnc-RHOQ-1	6.942191565	2.486494243	19.21986959	5.14E-09	5.10E-07	10.83872341	-	-
XLOC_2712800	4.425660514	2.947250907	19.19839321	5.19E-09	5.14E-07	10.42132235	-	-
lnc-SLTM-1	6.844813944	2.62862176	19.19559269	5.20E-09	5.14E-07	10.79015339	-	-
lnc-FABP3-1	7.6402368	3.596160535	19.16600002	5.27E-09	5.20E-07	10.83758247	-	-
lnc-MAPK6-9	7.971028879	1.81281069	19.16323947	5.28E-09	5.20E-07	10.64680292	-	-
lnc-AC079341.1-10	5.257812941	2.39984959	19.08907081	5.48E-09	5.37E-07	10.79101571	-	-
lnc-SLC3A2-3	7.226918772	3.2371934	19.07183761	5.53E-09	5.40E-07	10.7202124	-	-
lnc-C5orf49-1	4.736349758	1.974816196	19.06244132	5.55E-09	5.41E-07	10.57770024	-	-
lnc-AC127496.3-6	6.228022188	3.875933062	19.05466786	5.57E-09	5.41E-07	10.76697719	-	-
lnc-ZNF681-2	5.311696245	2.383177427	19.00218289	5.72E-09	5.51E-07	10.7154621	-	-
lnc-SMARCC2-5	8.305675093	4.754812118	18.99963457	5.73E-09	5.51E-07	10.73446882	-	-
lnc-CYB5D2-2	9.333204486	4.627054992	18.99842901	5.73E-09	5.51E-07	10.77273856	-	-
XLOC_2028126	-5.672335048	2.809429376	-18.97013613	5.81E-09	5.57E-07	10.09857185	-	-
lnc-SH3BGRL2-9	5.697279476	2.54943782	18.92838085	5.93E-09	5.67E-07	10.685429	-	-
lnc-H2AFY2-1	8.39016169	4.188772996	18.92717387	5.94E-09	5.67E-07	10.74057968	-	-
lnc-HPCAL1-2	6.012006603	2.41509797	18.89329499	6.04E-09	5.75E-07	10.72297688	-	-
lnc-SHANK2-3	6.688311943	3.211017341	18.87836289	6.08E-09	5.78E-07	10.71802474	-	-
lnc-CYB5R2-3	-6.564472296	2.272834304	-18.86881347	6.11E-09	5.80E-07	10.72210495	-	-
lnc-KCNH5-3	5.361779161	2.418206731	18.85445853	6.16E-09	5.82E-07	10.69513293	-	-
XLOC_847555	6.798960589	3.154375972	18.82615313	6.24E-09	5.88E-07	10.65407092	-	-
XLOC_651258	4.902248976	2.369332611	18.79745612	6.33E-09	5.94E-07	10.49320422	-	-
lnc-SPRYD3-1	5.759582217	7.922713545	18.79638546	6.34E-09	5.94E-07	10.14778978	-	-
lnc-SLC25A21-4	6.583845635	3.000972727	18.78522894	6.37E-09	5.96E-07	10.68138705	-	-
lnc-GOSR2-2	4.368526787	7.907941628	18.78126046	6.38E-09	5.96E-07	10.58081314	-	-
lnc-C6orf108-1	6.809014975	3.902346714	18.74915588	6.49E-09	6.03E-07	10.64973825	-	-
lnc-ZNF514-2	5.497546522	3.141700839	18.74246034	6.51E-09	6.04E-07	10.374062	-	-
lnc-ASCC2-1	6.447224308	2.827041732	18.71236582	6.61E-09	6.11E-07	10.6548117	-	-
lnc-AP3S1-1	6.374957118	4.730338359	18.71007118	6.62E-09	6.11E-07	10.57535323	-	-
lnc-SNX20-5	7.529263958	3.322039096	18.70537197	6.63E-09	6.11E-07	10.62412585	-	-
lnc-TRAPPC12-1	7.21071217	6.314109918	18.68892667	6.69E-09	6.15E-07	9.631675268	-	-
lnc-TMEM164-2	7.204895233	3.216620753	18.6602567	6.79E-09	6.22E-07	10.6086732	-	-
lnc-CPM-1	8.88044255	4.055473355	18.62080112	6.92E-09	6.33E-07	10.5842423	-	-
lnc-AC002553.1-1	7.529378512	3.589445459	18.61861826	6.93E-09	6.33E-07	10.56495087	-	-
lnc-NPAS2-2	6.757198489	3.741437255	18.58948641	7.03E-09	6.41E-07	10.42201388	-	-
lnc-STAP1-12	7.712174876	3.609595025	18.54914384	7.18E-09	6.51E-07	10.52470901	-	-
lnc-ARHGAP32-4	5.724132819	2.479035501	18.49603914	7.37E-09	6.66E-07	10.53269553	-	-
lnc-NDUFAF3-1	7.481201459	3.837867284	18.48079741	7.43E-09	6.68E-07	10.5369132	-	-
lnc-GCC2-1	5.29117243	1.657759768	18.47001048	7.47E-09	6.70E-07	10.55758845	-	-
lnc-C20orf187-1	-6.449865735	2.269618622	-18.46726997	7.48E-09	6.70E-07	10.5619721	-	-
XLOC_845645	5.300675867	2.246178124	18.45605275	7.53E-09	6.72E-07	10.53953964	-	-
lnc-AC007390.5.1-4	5.835393792	1.938907139	18.44641201	7.56E-09	6.74E-07	10.55356621	-	-
lnc-COTL1-2	8.178360706	4.343968205	18.41779885	7.67E-09	6.83E-07	10.52213541	-	-
XLOC_515042	6.683301165	4.082391086	18.39033954	7.78E-09	6.91E-07	10.46192766	-	-
lnc-HAAO-1	4.812453455	1.55269498	18.36849335	7.87E-09	6.96E-07	9.592548505	-	-
lnc-CBR1-1	5.945463873	2.93306578	18.34160061	7.98E-09	7.03E-07	10.49834776	-	-
lnc-SCD-2	6.233903521	2.100575148	18.32982776	8.03E-09	7.05E-07	10.26580166	-	-
lnc-PDGFRL-2	7.752383559	3.884416342	18.30047277	8.15E-09	7.14E-07	10.45525504	-	-
XLOC_000108	5.78232007	2.732644231	18.29134399	8.19E-09	7.16E-07	10.46171714	-	-
lnc-CCDC148-1	7.17081723	3.28400819	18.28861525	8.20E-09	7.16E-07	10.48509414	-	-
lnc-HMGB2-1	6.214849349	2.810694457	18.28511445	8.21E-09	7.16E-07	10.32291597	-	-
lnc-PNO1-1	8.302002504	4.310036169	18.27799799	8.24E-09	7.16E-07	10.47693196	-	-
lnc-CCRN4L-14	7.44404346	2.836672377	18.26322884	8.31E-09	7.19E-07	10.4268799	-	-
lnc-ARHGEF40-1	7.065748746	4.291107163	18.25371067	8.35E-09	7.20E-07	10.42666362	-	-
lnc-ZFYVE9-1	7.234962333	3.976992682	18.25348961	8.35E-09	7.20E-07	10.44100537	-	-
lnc-ALX4-5	7.35787971	3.437751436	18.23618739	8.42E-09	7.25E-07	10.46274943	-	-
lnc-PCM1-3	6.380976269	3.077865611	18.19017891	8.63E-09	7.35E-07	10.43485693	-	-
XLOC_1233095	8.636441958	4.257876136	18.15316176	8.79E-09	7.46E-07	10.41508552	-	-
lnc-RC3H1-1	5.162238108	2.326354482	18.09113217	9.08E-09	7.63E-07	10.39574804	-	-
XLOC_1622587	6.88726255	1.41678792	18.06583667	9.20E-09	7.71E-07	10.23187283	-	-
lnc-RFC2-4	5.389583026	1.699139536	18.04638502	9.29E-09	7.74E-07	10.1055324	-	-
lnc-DLX2-3	5.588858502	3.395267105	18.04437284	9.30E-09	7.74E-07	10.29288178	-	-
lnc-PPP1CB-1	7.594241043	4.004376039	18.01864713	9.43E-09	7.81E-07	10.33757377	-	-
C15orf59-AS1	5.503245306	2.867179305	17.9887843	9.58E-09	7.92E-07	10.23841076	-	-
lnc-INTS12-1	5.855793977	2.629973699	17.97518967	9.65E-09	7.94E-07	10.36117495	-	-
lnc-MYL12A-1	6.279252048	3.046399261	17.96714771	9.69E-09	7.96E-07	10.35832509	-	-
lnc-DNASE1L2-1	4.667775704	2.037124936	17.95334046	9.76E-09	7.98E-07	10.35221799	-	-
lnc-PPP1R14B-1	4.631504397	1.679119735	17.94264763	9.81E-09	8.01E-07	10.33906253	-	-
lnc-USP45-1	6.979940012	1.610752976	17.93066661	9.87E-09	8.05E-07	10.15205962	-	-
lnc-ANGPTL2-1	5.848059233	1.982385719	17.85871151	1.03E-08	8.27E-07	10.31036908	-	-
lnc-KCNT1-7	6.34918538	3.954112456	17.85743806	1.03E-08	8.27E-07	10.10153315	-	-
XLOC_1235635	6.98878437	1.462107197	17.77769672	1.07E-08	8.59E-07	10.10638171	-	-
lnc-FKRP-1	7.252050337	4.344608336	17.77315375	1.07E-08	8.59E-07	10.18557118	-	-
lnc-SNX20-3	6.742415375	2.725426411	17.74507028	1.09E-08	8.70E-07	10.2066517	-	-
lnc-BRI3-1	7.54693484	5.945750295	17.74221125	1.09E-08	8.70E-07	10.19033079	-	-
lnc-C5orf35-3	6.963473325	3.214515202	17.66885154	1.13E-08	9.01E-07	10.22080131	-	-
lnc-RANBP1-1	7.151009836	3.27739631	17.62225577	1.16E-08	9.22E-07	9.928315303	-	-
lnc-FAM43A-2	7.397709676	2.698206375	17.59654192	1.18E-08	9.31E-07	10.19863656	-	-
lnc-ZNF582-3	9.191061696	4.65609438	17.55192242	1.21E-08	9.47E-07	10.16169442	-	-
XLOC_1622484	9.027584281	4.707103987	17.48456027	1.25E-08	9.67E-07	10.14675408	-	-
XLOC_2834721	-7.354790644	3.637393131	-17.35536365	1.34E-08	1.03E-06	10.0260335	-	-
lnc-PDZD7-2	6.059801062	1.263786205	17.33954467	1.35E-08	1.03E-06	9.9341758	-	-
lnc-RELL2-1	8.25723558	5.06667838	17.31049333	1.37E-08	1.05E-06	10.04478003	-	-
XLOC_2218929	8.761011795	4.640224124	17.30335041	1.38E-08	1.05E-06	9.746909221	-	-
lnc-TMTC3-14	6.437806186	2.831859221	17.27697502	1.40E-08	1.06E-06	10.03234809	-	-
lnc-MRP63-6	7.064868772	3.334446846	17.24001412	1.43E-08	1.08E-06	10.00001846	-	-
lnc-PSMC3IP-1	4.595347886	7.630753092	17.23157962	1.43E-08	1.08E-06	9.607688643	-	-
lnc-USP50-2	7.54290751	2.98330838	17.21790213	1.44E-08	1.08E-06	10.00609372	-	-
lnc-IRAK4-2	6.196738425	2.709905129	17.12593937	1.52E-08	1.13E-06	9.923826724	-	-
lnc-C18orf42-3	6.823375575	2.362976503	17.12475548	1.52E-08	1.13E-06	9.98919797	-	-
lnc-PDZD9-1	5.344516584	1.631789968	17.11952041	1.52E-08	1.13E-06	9.794269377	-	-
lnc-FEM1A-4	9.082040361	5.639840909	17.10487233	1.54E-08	1.14E-06	9.965943177	-	-
lnc-ZNF780B-1	5.635512511	2.677333387	17.10258135	1.54E-08	1.14E-06	9.961680074	-	-
XLOC_001052	6.600815014	4.431272266	17.04164764	1.59E-08	1.17E-06	9.533406118	-	-
lnc-TMEM22-2	5.039182236	2.35935313	17.00419369	1.62E-08	1.19E-06	9.92663921	-	-
lnc-ORC4-1	8.313498731	2.968180118	16.9889415	1.64E-08	1.20E-06	9.887529768	-	-
lnc-MAP4K3-2	5.847414212	1.530355419	16.98014256	1.65E-08	1.20E-06	9.903097129	-	-
ZSCAN16-AS1	6.350284458	3.231487805	16.9651769	1.66E-08	1.21E-06	9.897895797	-	-
lnc-MTIF3-2	7.768562402	4.507297029	16.84320223	1.78E-08	1.27E-06	9.799446355	-	-
lnc-PTDSS1-1	7.628665869	3.751811102	16.83000451	1.79E-08	1.28E-06	9.780909049	-	-
lnc-GIP-5	7.58632509	2.813196777	16.81933059	1.80E-08	1.28E-06	9.815070599	-	-
lnc-MRPS11-2	6.597987184	3.986431207	16.81459073	1.80E-08	1.29E-06	9.7714048	-	-
lnc-GTF2F2-7	3.669731135	13.39908077	16.80823916	1.81E-08	1.29E-06	9.694497081	-	-
lnc-TNIP2-1	7.178395613	4.185067354	16.79396115	1.82E-08	1.30E-06	9.711610773	-	-
XLOC_375824	5.752908451	1.901079671	16.78412556	1.83E-08	1.30E-06	9.823162957	-	-
lnc-GPS1-1	5.752061771	1.7658083	16.76185885	1.86E-08	1.31E-06	9.305466733	-	-
lnc-LEO1-2	8.040976239	3.798755401	16.76119164	1.86E-08	1.31E-06	9.686705436	-	-
lnc-CHST7-2	6.879260252	3.370841417	16.74837425	1.87E-08	1.31E-06	9.802067785	-	-
lnc-NDE1-3	7.340901727	3.02519501	16.73291886	1.89E-08	1.32E-06	9.809263517	-	-
lnc-CNDP1-1	5.870239582	2.001197535	16.72320895	1.90E-08	1.33E-06	9.791325001	-	-
lnc-JAG1-1	7.371004422	3.709236119	16.70228252	1.92E-08	1.34E-06	9.780610635	-	-
XLOC_1174717	6.630408433	2.661433727	16.69896221	1.92E-08	1.34E-06	9.742643868	-	-
lnc-KBTBD3-1	6.868228429	2.348744344	16.68744867	1.94E-08	1.35E-06	9.781012466	-	-
LINC01091	-7.072256332	3.228840469	-16.67699818	1.95E-08	1.35E-06	9.715545403	-	-
lnc-TMEM85-2	5.069663388	2.471629629	16.674379	1.95E-08	1.35E-06	9.651301452	-	-
lnc-HCRTR1-1	5.41978031	3.412983445	16.66112836	1.97E-08	1.35E-06	9.684766711	-	-
lnc-KIAA0020-7	7.709070245	3.415302501	16.65829743	1.97E-08	1.35E-06	9.736734059	-	-
lnc-MARCH4-1	5.267250929	2.627762594	16.65729748	1.97E-08	1.35E-06	9.749959555	-	-
lnc-ST7L-3	8.162704956	5.076276569	16.64174061	1.99E-08	1.36E-06	9.755065546	-	-
lnc-COIL-2	4.595376615	1.368215896	16.64067694	1.99E-08	1.36E-06	9.648486962	-	-
lnc-C1orf56-1	7.856302664	3.870088735	16.61264166	2.02E-08	1.38E-06	9.740161025	-	-
lnc-BCL2L13-3	6.667486668	2.461303042	16.58715625	2.05E-08	1.40E-06	9.716725562	-	-
lnc-NFKBIB-5	6.675345843	3.538588566	16.57095949	2.07E-08	1.40E-06	9.721478971	-	-
lnc-MZT2B-1	4.89874331	1.536599071	16.55140904	2.09E-08	1.41E-06	9.725158802	-	-
lnc-ANKMY2-1	6.067980049	2.907861877	16.51157016	2.14E-08	1.44E-06	9.709256714	-	-
lnc-MEST-2	7.534401777	4.092240582	16.4976933	2.16E-08	1.45E-06	9.702626986	-	-
lnc-CYTH4-4	6.290463285	3.600079736	16.48886828	2.17E-08	1.45E-06	9.643338942	-	-
XLOC_1831791	6.812631918	2.446588918	16.46737887	2.19E-08	1.47E-06	9.686807658	-	-
lnc-PRPF4B-5	6.947792056	4.462019645	16.44826271	2.22E-08	1.48E-06	9.649144921	-	-
lnc-PAH-3	-6.542419702	2.357373336	-16.4250422	2.25E-08	1.50E-06	9.666657992	-	-
SBF2-AS1	9.032333786	5.649339913	16.42063352	2.25E-08	1.50E-06	9.650223388	-	-
lnc-ZNF575-1	6.774863334	3.33582086	16.34963126	2.34E-08	1.56E-06	9.608654305	-	-
XLOC_1623353	6.500087011	3.048268843	16.32914609	2.37E-08	1.57E-06	9.622167445	-	-
lnc-CD53-2	5.63928932	2.269375408	16.29602528	2.42E-08	1.60E-06	9.559728427	-	-
XLOC_1484827	7.747801259	3.951243517	16.28342827	2.44E-08	1.61E-06	9.296940054	-	-
lnc-TMEM75-8	-6.467179354	2.214594063	-16.26304335	2.46E-08	1.62E-06	9.494382332	-	-
lnc-SETD8-1	6.012191411	3.049347782	16.25225429	2.48E-08	1.63E-06	9.585041096	-	-
lnc-NSUN7-1	6.562219014	1.370251596	16.24833819	2.48E-08	1.63E-06	9.430558668	-	-
lnc-ARMC2-1	7.906746987	3.927915704	16.23327483	2.51E-08	1.64E-06	9.564342677	-	-
lnc-OTUD6B-2	8.01552491	3.34438275	16.22371157	2.52E-08	1.64E-06	9.568604722	-	-
lnc-ACSBG1-4	7.812228048	6.974927038	16.19191469	2.57E-08	1.66E-06	9.325642589	-	-
lnc-CYS1-5	5.208756635	1.656066592	16.14168195	2.64E-08	1.70E-06	9.529160106	-	-
lnc-ALG3-3	6.00258785	1.77137032	16.13410288	2.65E-08	1.71E-06	9.522798831	-	-
lnc-EEF1B2-2	6.225001812	2.887184328	16.12320159	2.67E-08	1.72E-06	9.508781708	-	-
lnc-ZNF841-2	6.296164896	2.736888734	16.03538818	2.81E-08	1.78E-06	9.457667512	-	-
lnc-ATM-1	5.968552637	2.93684128	16.00055103	2.87E-08	1.82E-06	9.42969094	-	-
lnc-SCN2A-6	4.282186409	1.959274946	15.99808351	2.87E-08	1.82E-06	9.457634111	-	-
lnc-IRGM-1	5.502894749	1.412496708	15.9869436	2.89E-08	1.83E-06	9.420661664	-	-
lnc-MTMR2-2	7.018345957	3.295245015	15.96595207	2.93E-08	1.84E-06	9.402741863	-	-
lnc-TAL2-2	-5.997862409	1.282071751	-15.94653523	2.96E-08	1.86E-06	9.051598024	-	-
lnc-ZNF727-6	5.280554849	2.171052118	15.91101792	3.02E-08	1.89E-06	9.310986557	-	-
lnc-HSPG2-1	7.375096356	2.800353249	15.90981571	3.02E-08	1.89E-06	9.414812962	-	-
lnc-CTRB1-2	6.162645131	2.638192292	15.90301636	3.04E-08	1.90E-06	9.366498314	-	-
lnc-ZNF506-2	7.920641515	3.91034655	15.89452445	3.05E-08	1.90E-06	9.405091928	-	-
lnc-ZNF740-2	6.163018077	2.689808935	15.89002085	3.06E-08	1.90E-06	9.383802275	-	-
lnc-FAM164C-2	9.930104238	5.666170265	15.86649545	3.10E-08	1.92E-06	9.376916623	-	-
lnc-TRIAP1-2	8.19945666	4.910618783	15.78938321	3.25E-08	2.00E-06	9.343093139	-	-
lnc-RNF208-1	4.471261787	2.235150616	15.77754007	3.27E-08	2.01E-06	9.301992718	-	-
lnc-BCL6-9	7.465737553	4.366408633	15.77632589	3.27E-08	2.01E-06	9.320383233	-	-
lnc-RNF149-2	8.932638909	4.465124181	15.76465479	3.29E-08	2.02E-06	9.341656517	-	-
lnc-PIGL-1	6.189679178	2.118922089	15.75351978	3.32E-08	2.02E-06	9.337148065	-	-
PRMT5-AS1	3.326285818	7.636780076	15.7479975	3.33E-08	2.02E-06	9.188888757	-	-
lnc-TMEM50B-2	8.223100515	4.425539758	15.74216725	3.34E-08	2.03E-06	9.332591429	-	-
lnc-MRTO4-2	6.371940544	3.757196432	15.74086426	3.34E-08	2.03E-06	9.274957798	-	-
lnc-EDC3-5	7.051305962	3.671229158	15.73680816	3.35E-08	2.03E-06	9.280055862	-	-
XLOC_1482847	7.26647966	2.776128255	15.73352507	3.36E-08	2.03E-06	9.327043323	-	-
lnc-PSMC1-1	5.357575652	1.720780389	15.73123828	3.36E-08	2.03E-06	9.303744645	-	-
lnc-POC5-1	6.638425054	3.173747008	15.72401921	3.37E-08	2.04E-06	9.280518318	-	-
lnc-EGR4-2	6.216346025	2.210484597	15.72164058	3.38E-08	2.04E-06	9.318887362	-	-
lnc-RPS27L-1	9.392974051	4.854789937	15.7044978	3.41E-08	2.05E-06	9.313146362	-	-
lnc-CTNS-1	3.023205093	8.441075084	15.70095201	3.42E-08	2.06E-06	9.266340444	-	-
lnc-EPOR-2	5.223635477	2.299406734	15.68346875	3.46E-08	2.07E-06	9.289253802	-	-
lnc-MARCH10-1	5.864246358	3.853160892	15.67417982	3.48E-08	2.08E-06	9.157145689	-	-
IGBP1-AS2	9.161741795	4.685426561	15.67326145	3.48E-08	2.08E-06	9.28375265	-	-
lnc-RAB3A-3	5.921601958	3.214059109	15.6616419	3.50E-08	2.09E-06	9.276104803	-	-
lnc-PPP1R13B-1	4.776062523	2.289569109	15.62229337	3.58E-08	2.13E-06	9.145159587	-	-
lnc-TMEM180-3	9.379728604	5.075588413	15.60835065	3.61E-08	2.15E-06	9.208021338	-	-
lnc-UBE2B-1	5.741123783	1.990056068	15.60610583	3.62E-08	2.15E-06	9.25706933	-	-
lnc-LSS-1	5.492501575	2.777345788	15.5911883	3.65E-08	2.16E-06	9.254208631	-	-
lnc-FDFT1-1	6.799714127	2.886835063	15.58308348	3.67E-08	2.17E-06	9.171129912	-	-
lnc-CHAC1-4	7.45372319	3.655336051	15.54610563	3.75E-08	2.20E-06	9.23043487	-	-
lnc-ZNF792-5	7.281098784	4.180418157	15.54449312	3.76E-08	2.20E-06	9.167870186	-	-
XLOC_1484828	7.611462476	3.66755387	15.50505877	3.84E-08	2.25E-06	9.209491239	-	-
lnc-MEPCE-2	5.686890401	4.257124399	15.46195273	3.95E-08	2.30E-06	9.174006802	-	-
XLOC_1623747	4.884616311	1.534776446	15.43939758	4.00E-08	2.33E-06	9.012223081	-	-
lnc-LSM5-2	8.462219043	4.029733725	15.43563103	4.01E-08	2.33E-06	9.174680933	-	-
lnc-TEFM-5	6.067449242	3.04158101	15.4348581	4.01E-08	2.33E-06	9.154905226	-	-
lnc-AP002414.1.1-1	6.470786567	2.651638984	15.37701718	4.15E-08	2.40E-06	9.09135454	-	-
lnc-ATP6V1C2-2	7.567654978	3.954948501	15.36859567	4.17E-08	2.41E-06	9.140602613	-	-
lnc-PTDSS2-1	-5.593883361	1.253708476	-15.3319468	4.27E-08	2.45E-06	8.686547485	-	-
lnc-LTBR-6	5.005440072	1.582426934	15.32634959	4.28E-08	2.46E-06	9.116478671	-	-
lnc-C4orf37-2	6.467713997	3.370830807	15.31329664	4.32E-08	2.47E-06	8.844073887	-	-
XLOC_931187	5.147748112	3.228210555	15.30955054	4.33E-08	2.48E-06	8.995003503	-	-
lnc-CREM-6	7.66956988	3.857698825	15.29947612	4.35E-08	2.48E-06	9.052598119	-	-
lnc-DUSP11-4	7.846381045	4.077817228	15.29427245	4.37E-08	2.48E-06	8.97400538	-	-
lnc-GAS8-1	-4.726245099	1.796485929	-15.28903238	4.38E-08	2.49E-06	8.439601245	-	-
lnc-COMMD1-1	8.893984116	4.750527093	15.27317027	4.42E-08	2.51E-06	9.00818955	-	-
lnc-CBY3-3	6.764601746	3.645910008	15.24301497	4.51E-08	2.55E-06	9.037390706	-	-
lnc-NAA11-1	6.56171136	1.345781654	15.22793448	4.55E-08	2.57E-06	8.959494676	-	-
lnc-SEBOX-1	7.078191981	4.312331197	15.21699839	4.58E-08	2.58E-06	9.047854306	-	-
lnc-CCNI-3	5.67982621	1.13298668	15.21409058	4.59E-08	2.58E-06	8.912596375	-	-
lnc-SLC16A6-2	7.756636283	2.806445472	15.21329645	4.59E-08	2.58E-06	9.056517704	-	-
lnc-AC008073.6.1-2	8.726265942	5.193963052	15.21128266	4.59E-08	2.58E-06	9.05291394	-	-
lnc-ZNF382-1	6.984232052	1.474569747	15.19748734	4.63E-08	2.59E-06	8.942814802	-	-
lnc-DPCD-3	6.762376457	3.869325718	15.19638466	4.64E-08	2.59E-06	9.03756516	-	-
lnc-PPP4C-1	8.325124432	4.276700928	15.19362741	4.64E-08	2.59E-06	9.035483009	-	-
lnc-OR4M2-12	-5.762764899	2.050931953	-15.06998208	5.01E-08	2.77E-06	8.959894018	-	-
lnc-PABPC1L2B-2	6.088823351	2.083315779	15.05807632	5.05E-08	2.78E-06	8.929989238	-	-
PLA2G4C-AS1	5.209831771	1.698200326	15.05674485	5.05E-08	2.78E-06	8.973056418	-	-
lnc-MLST8-1	6.144104825	2.557937911	15.03969788	5.10E-08	2.81E-06	8.937784404	-	-
lnc-POTEB-5	-5.817189396	2.368183872	-15.02301634	5.16E-08	2.83E-06	8.86474651	-	-
lnc-A1BG-3	5.05834442	4.390509801	14.99745755	5.24E-08	2.87E-06	8.663414197	-	-
lnc-C1orf132-1	-6.106238238	3.798098497	-14.98511194	5.28E-08	2.88E-06	8.44265804	-	-
XLOC_2836988	-6.236059352	2.60805086	-14.97173783	5.32E-08	2.90E-06	8.681331107	-	-
lnc-ANKRD30A-5	-6.536475525	1.994389087	-14.95588001	5.38E-08	2.92E-06	8.546433484	-	-
GLYCTK-AS1	5.49685355	0.997046205	14.95469533	5.38E-08	2.92E-06	8.794366585	-	-
lnc-SH3RF1-2	5.611420329	1.876122642	14.94010928	5.43E-08	2.94E-06	8.911596833	-	-
XLOC_2714423	3.340754062	1.497587358	14.93164436	5.46E-08	2.95E-06	8.775828693	-	-
XLOC_2395743	5.811919559	1.838985823	14.93117073	5.46E-08	2.95E-06	8.902167062	-	-
lnc-PRDM2-2	4.873563672	1.997522533	14.92020625	5.50E-08	2.96E-06	8.868476395	-	-
XLOC_1176009	5.556841323	2.460784982	14.91918815	5.50E-08	2.96E-06	8.800729578	-	-
lnc-RIMS3-3	7.40914364	2.561204721	14.90573868	5.55E-08	2.98E-06	8.8822446	-	-
lnc-RNF24-5	6.883103126	3.092734346	14.90199149	5.56E-08	2.98E-06	8.839917353	-	-
lnc-SYNE2-1	5.812147668	2.669391123	14.8530573	5.73E-08	3.06E-06	8.785537158	-	-
lnc-NID2-5	8.76222256	5.03363061	14.85258399	5.73E-08	3.06E-06	8.859335716	-	-
lnc-STS-1	5.659787219	1.008280655	14.84642116	5.76E-08	3.07E-06	8.759012869	-	-
lnc-SLC2A6-2	5.316481705	2.517052986	14.81419882	5.87E-08	3.13E-06	8.844042558	-	-
lnc-CHMP4C-2	5.495886841	0.984494457	14.80188153	5.92E-08	3.14E-06	8.720400109	-	-
lnc-FABP3-3	5.268055865	1.735250731	14.78328547	5.99E-08	3.17E-06	8.826013686	-	-
lnc-PEA15-1	7.106194323	5.378651276	14.76626782	6.05E-08	3.20E-06	8.789015873	-	-
lnc-CCDC125-22	9.145623214	5.324687733	14.75946275	6.08E-08	3.21E-06	8.773115677	-	-
XLOC_932582	6.848990389	3.391869785	14.75547025	6.09E-08	3.21E-06	8.79932313	-	-
lnc-HCN3-1	6.573279442	2.968232734	14.73815253	6.16E-08	3.24E-06	8.767171559	-	-
MEF2C-AS1	-6.310792941	2.652717938	-14.72058172	6.23E-08	3.27E-06	8.791713639	-	-
lnc-NT5DC2-1	6.23123317	4.945659482	14.71729185	6.24E-08	3.28E-06	8.645292475	-	-
lnc-RPL14-2	7.65152472	4.641161475	14.7077894	6.28E-08	3.29E-06	8.774182132	-	-
lnc-POU5F1B-10	-6.719058064	1.949645103	-14.68642654	6.36E-08	3.32E-06	8.561511034	-	-
lnc-CSMD1-7	3.983486288	1.662759899	14.67980216	6.39E-08	3.33E-06	8.486573081	-	-
lnc-RAD9B-1	8.291190697	3.625717915	14.6643512	6.45E-08	3.36E-06	8.729542018	-	-
lnc-MKLN1-1	6.552989716	3.859473615	14.66010477	6.47E-08	3.37E-06	8.708133124	-	-
lnc-ZNF146-1	6.160257184	3.876867994	14.65030056	6.51E-08	3.38E-06	8.693875493	-	-
lnc-SLC25A16-2	5.494030054	1.012777448	14.64823929	6.52E-08	3.38E-06	8.630091307	-	-
lnc-EIF2B1-3	5.546933128	2.359604476	14.62307934	6.62E-08	3.43E-06	8.67144449	-	-
lnc-TUBA1C-3	6.807139128	4.120997872	14.62165072	6.63E-08	3.43E-06	8.725861247	-	-
lnc-CDKL1-1	5.633572404	2.776525505	14.61838098	6.64E-08	3.43E-06	8.726581309	-	-
lnc-TNP1-4	5.62565109	1.431047818	14.61221645	6.67E-08	3.44E-06	8.562839616	-	-
lnc-C1orf106-1	-5.605998628	1.83587746	-14.59002336	6.77E-08	3.48E-06	8.718901267	-	-
lnc-CALHM1-1	-4.904598847	1.003993303	-14.56753175	6.86E-08	3.51E-06	8.345947198	-	-
lnc-TMEM220-1	7.679051125	4.89377219	14.55944147	6.90E-08	3.52E-06	8.620402738	-	-
lnc-C4orf34-3	7.691838557	2.018684635	14.55173259	6.93E-08	3.54E-06	8.502042855	-	-
lnc-DSCC1-1	6.897830321	4.307782635	14.54327862	6.97E-08	3.55E-06	8.649834361	-	-
XLOC_376348	5.892359923	3.095122784	14.51496486	7.10E-08	3.61E-06	8.676547059	-	-
lnc-CD151-2	5.950223088	2.010588013	14.51212532	7.11E-08	3.61E-06	8.671910506	-	-
lnc-RAB17-2	9.469953654	5.839351332	14.49825129	7.17E-08	3.63E-06	8.658876093	-	-
lnc-ABCC3-1	7.941522551	4.910818952	14.47853718	7.26E-08	3.66E-06	8.582588507	-	-
XLOC_2839044	-5.657708907	1.836427062	-14.47183544	7.29E-08	3.67E-06	8.569216069	-	-
lnc-DENND4C-1	4.960780981	2.1724656	14.45326879	7.38E-08	3.71E-06	8.473871147	-	-
lnc-LSG1-4	7.087161879	2.398760313	14.43464814	7.47E-08	3.74E-06	8.606307958	-	-
XLOC_515583	5.089556912	2.092768395	14.42402442	7.52E-08	3.76E-06	8.589595985	-	-
XLOC_1014164	-5.328244083	2.720611049	-14.41054849	7.59E-08	3.79E-06	8.186090111	-	-
lnc-FAM183A-3	4.776971426	2.415634317	14.39575486	7.66E-08	3.81E-06	8.600344547	-	-
lnc-WDR77-2	6.580342077	3.415593027	14.37831749	7.75E-08	3.84E-06	8.55823998	-	-
XLOC_2028132	-5.409223351	2.508914962	-14.35362779	7.87E-08	3.89E-06	8.390810719	-	-
lnc-ZNF701-2	8.227275397	5.288740064	14.26881872	8.31E-08	4.08E-06	8.478976594	-	-
lnc-FTSJ3-1	7.239986575	6.504386777	14.25325309	8.40E-08	4.12E-06	8.125571944	-	-
XLOC_2993599	-5.725090365	2.256859058	-14.22850506	8.53E-08	4.17E-06	8.355397745	-	-
NCBP2-AS1	6.681880818	3.521485758	14.21669806	8.60E-08	4.20E-06	8.50750185	-	-
lnc-SMARCC2-7	5.69758672	1.387814736	14.21431609	8.61E-08	4.20E-06	8.383951214	-	-
lnc-ATP6V1G3-4	-5.58561744	2.351031131	-14.21226763	8.63E-08	4.20E-06	8.312008492	-	-
lnc-AF131216.6.1-2	6.637722632	2.885668476	14.20336558	8.68E-08	4.22E-06	8.476902537	-	-
lnc-KANK3-3	8.094818694	4.057744351	14.20268404	8.68E-08	4.22E-06	8.434720181	-	-
lnc-PADI4-2	8.445146112	4.779825673	14.19877428	8.70E-08	4.23E-06	8.486642154	-	-
lnc-ZNF423-3	5.47278168	3.602382936	14.15451768	8.96E-08	4.34E-06	8.45510994	-	-
lnc-DNAJC5B-1	7.273563968	4.233056889	14.15212961	8.97E-08	4.34E-06	8.325611382	-	-
XLOC_1178154	5.615144807	1.633285615	14.1246737	9.13E-08	4.41E-06	8.357138757	-	-
lnc-C5orf32-3	6.560320917	2.215649903	14.11561855	9.19E-08	4.43E-06	8.446020294	-	-
lnc-C12orf40-3	7.816685355	4.259470661	14.10080999	9.28E-08	4.46E-06	8.378187478	-	-
XLOC_2220896	8.076001041	4.782669067	14.085201	9.37E-08	4.50E-06	8.407484895	-	-
lnc-C9orf57-3	7.674508891	3.614405227	14.07413778	9.44E-08	4.53E-06	8.424390066	-	-
XLOC_1175511	8.176692981	4.770164971	14.03930302	9.66E-08	4.61E-06	8.394568804	-	-
lnc-LRRFIP2-1	8.798272796	5.303828176	14.02993217	9.72E-08	4.63E-06	8.389958366	-	-
lnc-THSD4-4	7.47934799	3.479614366	14.0053591	9.88E-08	4.70E-06	8.382937162	-	-
lnc-SPATA12-2	6.484935947	3.360029332	14.00324627	9.89E-08	4.70E-06	8.369839795	-	-
lnc-CTSZ-7	7.191441641	3.118137692	14.00254646	9.90E-08	4.70E-06	8.381744919	-	-
lnc-RMI1-1	7.909019687	6.579385604	13.97426679	1.01E-07	4.79E-06	8.140197918	-	-
lnc-GPR160-1	8.076223943	3.889034436	13.97137509	1.01E-07	4.79E-06	8.364030441	-	-
lnc-TFB2M-1	7.252227676	3.366541169	13.94462302	1.03E-07	4.87E-06	8.334077595	-	-
lnc-PNLIPRP1-1	5.48534267	2.636009616	13.93404324	1.04E-07	4.89E-06	8.339405356	-	-
lnc-MFSD2A-1	5.408898236	2.74040523	13.87831689	1.07E-07	5.05E-06	8.286563895	-	-
THRIL	5.636336377	1.084519645	13.83636376	1.10E-07	5.17E-06	8.181241727	-	-
lnc-ZNF175-1	5.957859111	1.130427573	13.82822926	1.11E-07	5.19E-06	8.19984989	-	-
lnc-PMM2-1	5.9430046	4.464365683	13.79475883	1.14E-07	5.28E-06	8.227762334	-	-
lnc-CPT2-3	7.160328703	3.599454117	13.79106509	1.14E-07	5.29E-06	8.239443419	-	-
lnc-RPS24-8	5.68470691	1.899793638	13.75992719	1.16E-07	5.39E-06	8.237222868	-	-
lnc-ILKAP-4	5.413159744	1.975187912	13.75547591	1.17E-07	5.39E-06	8.225766356	-	-
lnc-IL10RB-3	5.425767676	3.458530645	13.75125353	1.17E-07	5.39E-06	8.158309095	-	-
lnc-PTGDR2-1	6.06036097	3.024971035	13.7494665	1.17E-07	5.39E-06	8.231283153	-	-
lnc-OXSM-2	6.012289955	3.304041936	13.72952307	1.19E-07	5.46E-06	8.213656561	-	-
lnc-WRNIP1-3	4.688308718	1.45085547	13.70233399	1.21E-07	5.54E-06	8.201446151	-	-
lnc-GAMT-7	7.122332713	3.478829957	13.69319743	1.22E-07	5.56E-06	8.19549969	-	-
lnc-TRNT1-1	7.048089001	2.493324269	13.69273538	1.22E-07	5.56E-06	8.194824429	-	-
lnc-CSMD1-18	6.108982459	2.823119827	13.64464599	1.26E-07	5.72E-06	8.154358614	-	-
lnc-VRK3-2	6.124160923	2.807859457	13.63894379	1.26E-07	5.73E-06	8.141688363	-	-
lnc-UNC93A-3	5.171934445	2.604839505	13.63543249	1.26E-07	5.74E-06	8.152185747	-	-
lnc-AMDHD2-2	5.437677767	3.163132431	13.63479824	1.26E-07	5.74E-06	8.088438724	-	-
LINC01224	-5.155880475	2.136652124	-13.6160973	1.28E-07	5.80E-06	7.786019008	-	-
lnc-MYO6-10	4.902058034	1.92901858	13.59533348	1.30E-07	5.88E-06	8.022579756	-	-
XLOC_2393515	5.63646484	1.859994621	13.59192241	1.30E-07	5.89E-06	8.132853629	-	-
lnc-TRMT1L-2	4.70217293	1.557211672	13.54044309	1.35E-07	6.09E-06	8.090006017	-	-
XLOC_1829717	5.880402841	1.571275909	13.52818892	1.36E-07	6.12E-06	8.094159848	-	-
lnc-ODF3L2-2	5.978004963	2.825953734	13.52503995	1.36E-07	6.12E-06	8.051913933	-	-
MIR4435-2HG	-5.453675046	2.012420742	-13.50761096	1.38E-07	6.18E-06	7.936248092	-	-
XLOC_846837	5.681137389	1.076373226	13.48875806	1.40E-07	6.25E-06	7.988092647	-	-
lnc-CCNB1IP1-2	4.294576923	1.943925828	13.48389716	1.40E-07	6.27E-06	8.04806331	-	-
lnc-RCAN3-1	6.11833883	2.019129258	13.47950063	1.41E-07	6.28E-06	8.060217698	-	-
lnc-LOH12CR1-1	8.872473536	6.502724655	13.47778011	1.41E-07	6.28E-06	8.048003191	-	-
lnc-ZNF394-1	5.50919567	1.800040813	13.42270988	1.46E-07	6.49E-06	8.028231084	-	-
lnc-PTPLA-2	6.283051743	2.636316406	13.3748664	1.51E-07	6.66E-06	7.96393501	-	-
lnc-PDZD7-1	6.693768736	5.106730486	13.34747054	1.54E-07	6.78E-06	7.975445632	-	-
lnc-RPUSD2-1	5.79159684	1.191967353	13.33089801	1.56E-07	6.85E-06	7.874987749	-	-
XLOC_514513	5.367734978	3.294585134	13.32333097	1.56E-07	6.87E-06	7.927637927	-	-
lnc-HSPB7-1	6.091129953	3.526537414	13.29978902	1.59E-07	6.97E-06	7.946246673	-	-
lnc-VPS4B-1	4.433091672	1.400869982	13.28684791	1.60E-07	7.02E-06	7.923285837	-	-
lnc-ZFYVE1-1	6.123496321	2.855169105	13.27298501	1.62E-07	7.07E-06	7.897618314	-	-
lnc-FAM57A-2	6.902512399	3.479760025	13.25378232	1.64E-07	7.16E-06	7.906038132	-	-
lnc-C9orf152-5	6.014347	2.682612843	13.24517274	1.65E-07	7.20E-06	7.919814141	-	-
lnc-FMN1-2	-5.352250251	1.677646283	-13.22643775	1.67E-07	7.27E-06	7.907976582	-	-
lnc-SUSD1-1	-6.047697472	2.402508251	-13.19868459	1.71E-07	7.38E-06	7.839755013	-	-
lnc-TSC1-1	4.673408398	9.240081144	13.19801749	1.71E-07	7.38E-06	7.870113887	-	-
lnc-DHX57-1	5.515838999	0.988196647	13.15444187	1.76E-07	7.59E-06	7.796837792	-	-
lnc-QDPR-2	6.052978858	2.041361227	13.15377533	1.76E-07	7.59E-06	7.851774605	-	-
lnc-MTRR-7	6.035056036	3.826400157	13.15193413	1.76E-07	7.59E-06	7.836008643	-	-
lnc-GGCT-1	-7.157523203	3.155584893	-13.14673262	1.77E-07	7.61E-06	7.830576386	-	-
lnc-CKAP4-1	4.580085486	2.301942075	13.12772956	1.79E-07	7.70E-06	7.84279686	-	-
lnc-NAA50-1	7.21179655	3.527821771	13.11983528	1.80E-07	7.73E-06	7.840866311	-	-
lnc-C8orf56-3	7.499332411	4.496450108	13.11730027	1.81E-07	7.74E-06	7.83264263	-	-
lnc-GPBP1-3	-6.037762492	1.317550859	-13.10843465	1.82E-07	7.77E-06	7.74516277	-	-
lnc-NLRP3-4	5.778140884	2.444322575	13.10619143	1.82E-07	7.77E-06	7.815649174	-	-
lnc-SAA2-2	5.169317701	2.326113747	13.09613369	1.83E-07	7.82E-06	7.70580772	-	-
XLOC_2840550	7.69431176	3.924708656	13.09395542	1.84E-07	7.82E-06	7.792078443	-	-
lnc-WDR86-2	8.021277213	3.927284504	13.09300615	1.84E-07	7.82E-06	7.819877951	-	-
lnc-ZNF551-2	6.69742143	3.488777925	13.08121651	1.85E-07	7.88E-06	7.782395155	-	-
lnc-ZNF836-2	3.816866177	7.835965533	13.08016732	1.85E-07	7.88E-06	7.722521196	-	-
lnc-HDLBP-2	8.311231854	5.754821449	13.06909266	1.87E-07	7.91E-06	7.638568863	-	-
lnc-AC010336.2-1	6.068494607	3.741337716	13.05725044	1.88E-07	7.96E-06	7.79267804	-	-
lnc-ZNF45-4	6.257160058	2.798425501	13.05336276	1.89E-07	7.98E-06	7.793860517	-	-
lnc-NUP107-1	5.021591322	0.841121339	13.05116984	1.89E-07	7.98E-06	7.717591687	-	-
lnc-PHF10-1	5.550449869	1.04414939	13.03751241	1.91E-07	8.04E-06	7.709260979	-	-
HAGLROS	6.229335576	3.19121613	13.03602593	1.91E-07	8.04E-06	7.782499822	-	-
lnc-PRDM14-5	4.037728071	1.055624116	13.00684341	1.95E-07	8.18E-06	7.683295812	-	-
lnc-AP005482.1.1-2	7.284303812	3.334861916	12.99274452	1.97E-07	8.24E-06	7.749112754	-	-
lnc-RUNDC3B-1	-6.625891786	1.485631604	-12.98232398	1.99E-07	8.30E-06	7.564206754	-	-
lnc-DDX27-3	7.044195943	4.183793694	12.96724306	2.01E-07	8.37E-06	7.729235337	-	-
lnc-ZNF486-6	6.513276613	4.151693898	12.95103993	2.03E-07	8.46E-06	7.659334087	-	-
lnc-TM2D2-1	6.046951553	2.814256982	12.94335039	2.04E-07	8.49E-06	7.726941104	-	-
lnc-PEX7-2	5.367808786	3.167990676	12.92998151	2.06E-07	8.57E-06	7.682930603	-	-
lnc-CCL27-1	5.277742599	1.657294446	12.91480863	2.08E-07	8.64E-06	7.702950407	-	-
lnc-MATN2-1	6.458192403	8.781689133	12.91302148	2.09E-07	8.64E-06	7.644390083	-	-
lnc-TRIM16-4	6.387738316	2.062311401	12.83164577	2.21E-07	9.10E-06	7.635283596	-	-
XLOC_1176874	7.15713605	4.401139321	12.83076999	2.21E-07	9.10E-06	7.519928705	-	-
lnc-MPP7-8	-5.943229233	2.4304857	-12.80772717	2.25E-07	9.22E-06	7.61521246	-	-
lnc-C12orf66-2	5.310722941	0.910695396	12.78196069	2.29E-07	9.34E-06	7.558500701	-	-
lnc-ZNF827-1	5.794973916	1.137469229	12.78157555	2.29E-07	9.34E-06	7.548018929	-	-
lnc-MYB-13	-6.06839535	1.340832042	-12.76499571	2.32E-07	9.44E-06	7.411797289	-	-
lnc-ENDOU-1	5.840844071	3.133277335	12.74772995	2.35E-07	9.55E-06	7.563838541	-	-
lnc-AC027323.1-2	5.857155973	2.922891282	12.73033039	2.38E-07	9.65E-06	7.578049461	-	-
lnc-DDX54-1	6.460773485	4.408210058	12.71439077	2.40E-07	9.74E-06	7.569742059	-	-
lnc-NHSL1-2	5.432445769	3.385938327	12.65513058	2.51E-07	1.01E-05	7.530318632	-	-
lnc-ZNF585A-3	5.717361419	2.201682584	12.6454645	2.53E-07	1.02E-05	7.528624054	-	-
lnc-MAPK6-5	5.294966681	4.019445878	12.64511546	2.53E-07	1.02E-05	7.51041317	-	-
LINC00890	4.694847438	6.235872619	12.64142273	2.53E-07	1.02E-05	7.502308938	-	-
lnc-ACY1-2	5.173473351	11.0591401	12.62963882	2.56E-07	1.02E-05	7.468918723	-	-
lnc-TTC26-5	4.555028552	0.651093022	12.61171983	2.59E-07	1.04E-05	7.444671576	-	-
XLOC_1176618	5.617504603	3.531414344	12.60564786	2.60E-07	1.04E-05	7.498264172	-	-
OXCT1-AS1	6.125973175	2.767516943	12.60442231	2.60E-07	1.04E-05	7.493020055	-	-
lnc-KCNJ12-4	5.424517072	1.338649246	12.6037646	2.60E-07	1.04E-05	7.446783151	-	-
XLOC_1230118	5.281195098	1.704127685	12.60353088	2.60E-07	1.04E-05	7.502444822	-	-
lnc-PLD6-1	4.884580982	0.770144853	12.5960751	2.62E-07	1.04E-05	7.43492493	-	-
DSG2-AS1	5.791319186	1.153930406	12.57514278	2.66E-07	1.06E-05	7.414155668	-	-
lnc-SYNM-2	5.461448349	3.564399189	12.53159257	2.74E-07	1.09E-05	7.427649975	-	-
lnc-IL32-1	3.833918568	1.112097562	12.51070398	2.79E-07	1.10E-05	7.358988418	-	-
lnc-CYFIP1-3	5.071682153	1.451755898	12.49229121	2.82E-07	1.11E-05	7.423146371	-	-
lnc-C1orf124-1	5.474885153	1.534045789	12.49224363	2.82E-07	1.11E-05	7.319906746	-	-
lnc-OSBPL9-3	7.595926632	4.470124209	12.48833453	2.83E-07	1.11E-05	7.41894389	-	-
lnc-POLE4-6	6.260498113	1.321135741	12.48383563	2.84E-07	1.11E-05	7.358626044	-	-
lnc-PPM1D-1	-5.887158104	1.313648954	-12.48069192	2.85E-07	1.11E-05	7.380774265	-	-
lnc-AC018816.3.1-9	5.119104197	2.441706586	12.43514024	2.94E-07	1.14E-05	7.368682775	-	-
lnc-THBS4-1	7.114311258	4.046913845	12.40864163	3.00E-07	1.16E-05	7.34849744	-	-
FAM13A-AS1	6.137647305	3.625727524	12.40696331	3.01E-07	1.16E-05	7.347564032	-	-
lnc-TOR3A-1	8.509138185	5.483315318	12.39896583	3.02E-07	1.17E-05	7.351752479	-	-
lnc-MARCKS-5	-4.725728689	1.64775506	-12.39880579	3.02E-07	1.17E-05	7.350309341	-	-
lnc-KLHDC10-2	6.307951086	1.297611397	12.38967753	3.04E-07	1.17E-05	7.307294669	-	-
lnc-ZBED4-1	5.677261159	3.04633995	12.38397288	3.06E-07	1.18E-05	7.330370165	-	-
lnc-PMEL-1	5.372381095	0.936255743	12.35675684	3.12E-07	1.20E-05	7.284102029	-	-
lnc-C6orf195-14	5.150460543	0.937568145	12.34515823	3.15E-07	1.21E-05	7.261602543	-	-
lnc-BLCAP-1	-5.438494881	2.498781825	-12.33206084	3.18E-07	1.22E-05	7.205049965	-	-
lnc-FAM161B-2	6.967592016	4.79012224	12.32711141	3.19E-07	1.22E-05	7.294044661	-	-
lnc-TMEM85-1	6.199105102	2.580622756	12.30010957	3.25E-07	1.24E-05	7.186500768	-	-
XLOC_2217240	6.117678654	3.736130947	12.29525984	3.27E-07	1.24E-05	7.287779448	-	-
lnc-ZNF710-1	6.21253185	1.235184771	12.29304462	3.27E-07	1.25E-05	7.242451278	-	-
lnc-ITIH3-4	5.284994755	0.92564435	12.27117154	3.32E-07	1.26E-05	7.227365923	-	-
lnc-PCDH12-1	7.977677895	4.203916647	12.2351954	3.41E-07	1.29E-05	7.251618793	-	-
lnc-BEAN1-1	6.566875756	4.27887857	12.19893952	3.51E-07	1.32E-05	7.221196321	-	-
XLOC_932070	6.427760381	3.301915943	12.16792972	3.59E-07	1.35E-05	7.200895038	-	-
lnc-MUC20-10	6.214973991	3.000873379	12.16663066	3.59E-07	1.35E-05	7.199091605	-	-
lnc-C5orf35-1	5.280545624	0.90693858	12.1613636	3.61E-07	1.35E-05	7.152977141	-	-
lnc-KCNT1-2	6.815704972	4.088261697	12.16135023	3.61E-07	1.35E-05	7.167941965	-	-
lnc-TMEM38A-2	6.584040299	2.098699472	12.1541641	3.63E-07	1.36E-05	7.145057766	-	-
lnc-CNIH3-2	-6.946639147	2.588405163	-12.15278124	3.63E-07	1.36E-05	7.13946074	-	-
lnc-PHRF1-1	4.138028663	2.184734144	12.15130916	3.63E-07	1.36E-05	7.179620188	-	-
lnc-TAF1D-1	4.517176124	2.13486338	12.1471838	3.65E-07	1.36E-05	7.182607567	-	-
XLOC_1174686	5.203824876	0.896769898	12.12077414	3.72E-07	1.38E-05	7.1253312	-	-
lnc-C22orf26-1	5.434461761	0.966040116	12.09761264	3.78E-07	1.40E-05	7.109594228	-	-
GRTP1-AS1	6.24359083	2.88331458	12.09689756	3.79E-07	1.40E-05	7.154882916	-	-
lnc-C1orf112-3	6.380778686	3.024009422	12.08121982	3.83E-07	1.41E-05	7.143724536	-	-
XLOC_2840602	-5.7316835	1.911947683	-12.06827475	3.87E-07	1.43E-05	7.103623959	-	-
lnc-ST6GAL2-1	-5.299523783	1.024084902	-12.05847544	3.90E-07	1.43E-05	6.984367676	-	-
lnc-C9orf103-7	7.27231791	4.57345867	12.04706972	3.93E-07	1.44E-05	7.108007562	-	-
lnc-PPP1R3A-4	5.056905269	0.874385305	12.02668458	3.99E-07	1.46E-05	7.050346017	-	-
lnc-NPAT-2	8.080854727	4.944379632	12.0217638	4.01E-07	1.47E-05	7.097707077	-	-
lnc-RP11-181C3.1.1-9	5.982509276	1.584061984	12.01891921	4.02E-07	1.47E-05	7.097954313	-	-
XLOC_1624274	5.206317602	2.03980306	12.00924014	4.05E-07	1.48E-05	6.937674791	-	-
lnc-CROCC-2	5.574691067	1.162635777	12.00542031	4.06E-07	1.48E-05	7.046062561	-	-
lnc-CPM-2	5.586109164	2.546255038	12.00196295	4.07E-07	1.48E-05	7.087377863	-	-
lnc-TMEM156-1	6.430970778	3.452486406	11.9947855	4.09E-07	1.49E-05	7.080873578	-	-
lnc-SERPINE2-1	5.525976172	1.943405988	11.97367578	4.16E-07	1.51E-05	7.059473106	-	-
lnc-SPTBN2-3	6.472475935	2.838614638	11.96810267	4.17E-07	1.51E-05	7.040639351	-	-
lnc-IRF4-6	6.730812566	4.56812241	11.96018615	4.20E-07	1.52E-05	7.053584848	-	-
lnc-KIAA0564-2	7.481033577	4.733643742	11.9563942	4.21E-07	1.52E-05	7.050897223	-	-
C1RL-AS1	4.985569311	1.191344253	11.92218562	4.32E-07	1.55E-05	6.984071635	-	-
XLOC_1093604	4.140033016	0.956282002	11.91541968	4.34E-07	1.56E-05	7.012719027	-	-
lnc-FAM96B-3	6.598776714	3.194438838	11.91229141	4.36E-07	1.56E-05	7.023425713	-	-
LINC01146	-4.09102574	2.308754408	-11.89564349	4.41E-07	1.58E-05	6.846955576	-	-
lnc-SLC2A1-1	6.153111514	1.23560793	11.89475036	4.41E-07	1.58E-05	6.969671888	-	-
lnc-WDR27-1	-5.481903547	1.102749761	-11.89282781	4.42E-07	1.58E-05	6.876053543	-	-
lnc-ALX4-7	8.268619938	5.260091003	11.86630141	4.51E-07	1.61E-05	6.904310096	-	-
lnc-RAB3GAP2-1	6.462150497	2.038591016	11.86283706	4.52E-07	1.61E-05	6.946062612	-	-
lnc-GPR27-5	6.317201801	3.119710525	11.84770413	4.58E-07	1.63E-05	6.977681464	-	-
lnc-RP11-498D10.4.1-1	5.814086445	3.585611373	11.84332871	4.59E-07	1.63E-05	6.962912711	-	-
lnc-MAP1LC3B-9	4.730230889	2.801521866	11.83874493	4.61E-07	1.63E-05	6.963206139	-	-
lnc-AP4E1-1	4.947918684	1.466777883	11.81624118	4.69E-07	1.65E-05	6.950443056	-	-
lnc-ST7L-1	6.651975111	2.973873937	11.78744312	4.79E-07	1.69E-05	6.934128045	-	-
lnc-GPR137C-2	6.360900742	2.764527449	11.7716518	4.85E-07	1.71E-05	6.903966511	-	-
lnc-NR2C2-1	5.200884384	3.376392735	11.75742379	4.90E-07	1.72E-05	6.891049434	-	-
lnc-SLC36A1-5	5.822782502	2.844408702	11.74114035	4.97E-07	1.74E-05	6.878519087	-	-
XLOC_1176877	5.545601149	3.55828108	11.72632919	5.02E-07	1.76E-05	6.884998693	-	-
lnc-CRHR1-6	6.861182091	3.906839619	11.72624438	5.02E-07	1.76E-05	6.877971262	-	-
HOXA10-AS	3.048635193	8.583249976	11.71965832	5.05E-07	1.77E-05	6.78768446	-	-
lnc-GPRC5D-3	7.53941679	3.554473864	11.71704032	5.06E-07	1.77E-05	6.864643132	-	-
lnc-RIPK2-2	6.025274508	2.046545523	11.71457775	5.07E-07	1.77E-05	6.87619641	-	-
lnc-KCTD2-2	4.366256385	9.586854467	11.69358729	5.15E-07	1.80E-05	6.795293884	-	-
lnc-VN1R2-8	6.869828055	4.165141492	11.69299393	5.16E-07	1.80E-05	6.861541288	-	-
lnc-ALG3-1	3.995719497	1.213838119	11.68257639	5.20E-07	1.81E-05	6.816490353	-	-
lnc-TMC5-1	8.102962756	3.647609867	11.66732591	5.26E-07	1.82E-05	6.846570995	-	-
lnc-NDFIP2-13	5.304118529	1.510254927	11.66678933	5.26E-07	1.82E-05	6.829305062	-	-
lnc-KLHL20-1	4.669260954	0.710395936	11.6575162	5.30E-07	1.84E-05	6.797835844	-	-
lnc-ARRDC1-1	6.684993331	4.981317899	11.65026161	5.33E-07	1.84E-05	6.780018597	-	-
BIRC6-AS1	8.712353941	5.051770404	11.64227713	5.36E-07	1.85E-05	6.81025615	-	-
lnc-AGGF1-1	6.580444405	1.40783884	11.59434236	5.57E-07	1.91E-05	6.756696832	-	-
lnc-HABP4-4	6.154399851	6.894997391	11.57237099	5.66E-07	1.94E-05	6.691488134	-	-
DNAJC9-AS1	6.629187563	1.409775274	11.56702007	5.69E-07	1.95E-05	6.733758428	-	-
XLOC_378685	3.647278533	1.331157705	11.5612591	5.71E-07	1.96E-05	6.766222457	-	-
lnc-NPIPL2-3	6.544647289	1.38901974	11.55362766	5.75E-07	1.97E-05	6.727278197	-	-
lnc-GARS-2	5.026553419	2.822749633	11.54433229	5.79E-07	1.98E-05	6.728452743	-	-
SRGAP3-AS4	4.995783503	0.889253927	11.51828025	5.91E-07	2.02E-05	6.67795869	-	-
lnc-EXOC2-21	-5.569273278	1.30481743	-11.49440073	6.02E-07	2.05E-05	6.616551132	-	-
lnc-NDUFV1-6	4.851840997	1.42438825	11.49426742	6.02E-07	2.05E-05	6.713883017	-	-
lnc-OTUD6B-1	7.285330014	3.551762117	11.46111061	6.18E-07	2.09E-05	6.69087267	-	-
lnc-TCTEX1D1-1	4.749489201	1.388488386	11.44170562	6.28E-07	2.12E-05	6.602453345	-	-
XLOC_1177575	6.162523225	2.485968434	11.42709795	6.35E-07	2.14E-05	6.667408282	-	-
lnc-ZNF790-1	5.077347195	1.960910898	11.41656489	6.40E-07	2.15E-05	6.659231023	-	-
lnc-SETD5-1	4.304484499	0.614260436	11.40510277	6.46E-07	2.16E-05	6.60772233	-	-
lnc-INPPL1-1	6.729513559	3.790824208	11.40474075	6.46E-07	2.16E-05	6.651699945	-	-
lnc-KIAA1147-1	6.861891524	3.565582553	11.40441356	6.46E-07	2.16E-05	6.647718456	-	-
lnc-TIMM9-3	-6.131445943	2.185534633	-11.36836239	6.65E-07	2.22E-05	6.479270139	-	-
XLOC_006489	-5.642716584	2.451065194	-11.36326375	6.68E-07	2.23E-05	6.598746129	-	-
lnc-NDUFAF2-2	3.780350048	6.988569954	11.35425694	6.73E-07	2.24E-05	6.344053478	-	-
MIR100HG	-6.556610484	1.517312881	-11.34953211	6.75E-07	2.25E-05	6.583324977	-	-
lnc-GRM7-2	-4.978697712	1.109837496	-11.34429964	6.78E-07	2.25E-05	6.561135614	-	-
lnc-PNMA1-1	5.565034029	3.547949427	11.33323286	6.84E-07	2.27E-05	6.594170201	-	-
XLOC_2558435	4.504450307	0.675058256	11.33181241	6.85E-07	2.27E-05	6.558502334	-	-
lnc-PTPN2-6	6.605546095	1.354807539	11.30360685	7.00E-07	2.32E-05	6.514834405	-	-
lnc-WDR26-1	-5.366957115	1.040857605	-11.29026389	7.08E-07	2.34E-05	6.461198649	-	-
SATB1-AS1	-6.240785531	2.142707204	-11.27924437	7.14E-07	2.36E-05	6.379666999	-	-
lnc-FAM138A-3	-5.768787082	1.27629073	-11.26421474	7.23E-07	2.38E-05	6.426510867	-	-
lnc-SRPK2-7	5.254437642	0.905826549	11.24772418	7.33E-07	2.41E-05	6.501961601	-	-
XLOC_1093591	4.91139878	0.84860443	11.24492601	7.34E-07	2.41E-05	6.477173035	-	-
XLOC_2559906	6.543363403	2.974570615	11.23282766	7.41E-07	2.43E-05	6.519772046	-	-
lnc-ARL4C-2	4.415599492	1.808520036	11.2319341	7.42E-07	2.43E-05	6.516079556	-	-
lnc-SH2D7-3	6.437923673	2.2567242	11.20435665	7.58E-07	2.47E-05	6.497775018	-	-
lnc-PODXL-3	8.169811986	4.712548337	11.18307539	7.72E-07	2.51E-05	6.470302207	-	-
lnc-NGFR-1	2.477016517	10.70074342	11.17690106	7.75E-07	2.52E-05	6.445136129	-	-
lnc-CDK20-12	6.581730215	3.237641118	11.17038794	7.80E-07	2.53E-05	6.462632012	-	-
XLOC_1174280	5.571191307	2.043232411	11.15954758	7.86E-07	2.55E-05	6.456562509	-	-
XLOC_1547464	7.726773706	4.676104955	11.15352811	7.90E-07	2.56E-05	6.438431859	-	-
lnc-RAB23-2	3.193376745	7.12550619	11.15247563	7.91E-07	2.56E-05	6.301761724	-	-
XLOC_2712490	7.416768076	4.683417662	11.14890853	7.93E-07	2.56E-05	6.453838227	-	-
lnc-ZSCAN2-6	4.512842995	1.449121448	11.14100668	7.98E-07	2.58E-05	6.450082714	-	-
lnc-PEX3-1	3.728748466	3.707214994	11.13750147	8.01E-07	2.58E-05	6.415983041	-	-
lnc-THUMPD2-1	4.54251441	0.664674433	11.1176745	8.14E-07	2.62E-05	6.40395945	-	-
lnc-SFN-1	4.995297067	0.810000418	11.11349992	8.16E-07	2.62E-05	6.400996056	-	-
H1FX-AS1	3.038335506	8.946386318	11.11033709	8.18E-07	2.63E-05	6.384794235	-	-
lnc-SIVA1-1	6.513245582	8.569033162	11.0934481	8.30E-07	2.66E-05	6.338808125	-	-
XLOC_2217271	4.778981623	0.757416701	11.07009886	8.46E-07	2.70E-05	6.368061848	-	-
lnc-P4HA3-1	7.194284462	4.6139001	11.06875367	8.46E-07	2.70E-05	6.392683139	-	-
lnc-SPP1-1	-5.257244694	1.051685334	-11.05922747	8.53E-07	2.72E-05	6.293385296	-	-
lnc-C12orf66-1	5.376064734	1.158564403	11.05541716	8.56E-07	2.73E-05	6.348463177	-	-
lnc-ZNF83-7	5.374222759	0.947718094	11.03386527	8.71E-07	2.77E-05	6.340691815	-	-
lnc-C1QTNF5-1	5.563306429	4.26284931	11.01860669	8.82E-07	2.80E-05	6.300113478	-	-
lnc-MYL6-2	7.40113277	4.661633414	11.01757633	8.83E-07	2.80E-05	6.352700734	-	-
FOXP1-AS1	6.13092805	1.287781402	11.00664568	8.90E-07	2.82E-05	6.287426911	-	-
lnc-RP11-537P22.1.1-1	-5.915676074	1.283876386	-10.99751044	8.97E-07	2.84E-05	6.277160965	-	-
lnc-SPIN1-1	-5.7440398	1.166123787	-10.9945609	8.99E-07	2.84E-05	6.31826596	-	-
lnc-GLIPR1L1-2	6.07712862	2.701644397	10.93358846	9.45E-07	2.97E-05	6.288227364	-	-
LINC00943	-5.438267138	1.103150777	-10.89435783	9.76E-07	3.07E-05	6.170718376	-	-
lnc-SEMA5B-1	5.468410573	1.00473307	10.89212212	9.78E-07	3.07E-05	6.231894869	-	-
lnc-C1orf201-5	3.311787549	7.502537383	10.88165442	9.87E-07	3.09E-05	6.225404015	-	-
lnc-ZNF83-6	7.661143266	5.035056959	10.87647743	9.91E-07	3.10E-05	6.244011519	-	-
lnc-CYB5R2-5	6.72941215	4.225251539	10.86930058	9.97E-07	3.12E-05	6.235875673	-	-
lnc-NAA50-3	9.072639241	5.745034431	10.867288	9.99E-07	3.12E-05	6.229486681	-	-
lnc-RP11-1105G2.3.1-3	5.606142627	1.94712089	10.86309815	1.00E-06	3.13E-05	6.233232096	-	-
XLOC_515896	5.520230478	1.022892146	10.85904358	1.01E-06	3.13E-05	6.206014917	-	-
lnc-SRPX2-2	8.055696263	7.990642192	10.81267465	1.04E-06	3.24E-05	6.166564496	-	-
lnc-DBNDD1-1	5.332006003	2.276978122	10.80478319	1.05E-06	3.26E-05	6.181792505	-	-
lnc-PSMG4-6	-6.639745228	1.744184942	-10.77758354	1.08E-06	3.32E-05	6.146886827	-	-
TCL6	-5.543583806	1.166451484	-10.76971091	1.08E-06	3.34E-05	6.131171791	-	-
lnc-GJA4-2	5.775869419	3.611665811	10.75798268	1.09E-06	3.36E-05	6.146831893	-	-
lnc-FUBP3-1	4.677825462	2.373049001	10.75757184	1.09E-06	3.36E-05	6.140994042	-	-
lnc-CHD2-3	-4.40229294	1.423195906	-10.75756184	1.09E-06	3.36E-05	6.093365567	-	-
ST8SIA6-AS1	3.583558383	1.087067338	10.74965262	1.10E-06	3.37E-05	6.111173494	-	-
lnc-GUSB-4	2.967004769	8.802815097	10.69597989	1.15E-06	3.51E-05	6.055030447	-	-
lnc-CPLX1-3	7.004369346	4.498307805	10.67996448	1.17E-06	3.55E-05	6.085047677	-	-
lnc-C6orf201-18	-4.645765022	0.927910174	-10.6733307	1.17E-06	3.57E-05	5.980958998	-	-
lnc-NUDT16-1	-5.735410222	1.377805401	-10.66707311	1.18E-06	3.58E-05	6.010150385	-	-
lnc-NDUFS6-17	5.014117571	2.242324098	10.66590072	1.18E-06	3.58E-05	6.075445414	-	-
lnc-RAI1-1	5.496010652	1.947891713	10.66580436	1.18E-06	3.58E-05	6.066261002	-	-
lnc-HMGB2-15	4.750035728	3.243037207	10.66472836	1.18E-06	3.58E-05	6.054812006	-	-
BOLA3-AS1	9.077857712	5.996453721	10.64370861	1.20E-06	3.64E-05	6.052505545	-	-
lnc-ZNF235-2	7.785731983	4.068569564	10.63705432	1.21E-06	3.66E-05	6.052086363	-	-
lnc-PLD3-3	6.278735108	4.227046374	10.61973404	1.23E-06	3.70E-05	6.036104639	-	-
XLOC_2220157	5.211776557	3.08190372	10.60873782	1.24E-06	3.73E-05	6.02608129	-	-
lnc-MUTYH-1	5.163255848	0.900092952	10.60131287	1.25E-06	3.75E-05	6.003316886	-	-
lnc-ABHD12B-4	4.896015084	0.801115954	10.59384721	1.25E-06	3.77E-05	5.997268741	-	-
IQCH-AS1	4.647407321	1.256459323	10.58282703	1.27E-06	3.80E-05	5.98371931	-	-
lnc-CHMP4C-1	4.312591207	2.370249632	10.58170606	1.27E-06	3.80E-05	6.005528508	-	-
lnc-CDC42SE1-1	5.464295892	1.791978003	10.57748142	1.27E-06	3.81E-05	5.983455777	-	-
lnc-CNOT7-1	-4.959675135	1.014360513	-10.5771867	1.27E-06	3.81E-05	5.929265846	-	-
LINC01606	-5.601068395	1.336181459	-10.57313953	1.28E-06	3.82E-05	5.970447563	-	-
lnc-EIF2C2-2	-6.519021911	1.43319584	-10.55101605	1.30E-06	3.88E-05	5.969131144	-	-
XLOC_1093877	6.206680437	1.271201573	10.54112224	1.31E-06	3.91E-05	5.955425348	-	-
lnc-NIPAL1-2	6.677282943	3.472040124	10.53818573	1.32E-06	3.92E-05	5.971479899	-	-
lnc-ZNF681-4	4.640285631	4.654333146	10.53495521	1.32E-06	3.93E-05	5.89889463	-	-
lnc-KDM4C-18	6.863796043	1.808351945	10.534156	1.32E-06	3.93E-05	5.926922212	-	-
lnc-EHBP1-1	-5.117384903	1.608896721	-10.52666576	1.33E-06	3.95E-05	5.795288845	-	-
lnc-FLNB-3	5.059423468	1.628286643	10.5250447	1.33E-06	3.95E-05	5.917647476	-	-
lnc-SNX11-7	-4.35669477	0.875969234	-10.51797815	1.34E-06	3.97E-05	5.853426376	-	-
XLOC_514621	5.615213387	1.034336927	10.495573	1.36E-06	4.03E-05	5.888985177	-	-
lnc-IARS2-2	6.674048885	3.608014965	10.49422013	1.37E-06	4.03E-05	5.933913947	-	-
XLOC_2837388	-6.917411145	4.906320219	-10.47773444	1.38E-06	4.08E-05	5.897701345	-	-
lnc-DENND2D-1	4.503735448	0.661371621	10.47688404	1.39E-06	4.08E-05	5.903194612	-	-
lnc-RNF139-2	6.709773889	4.30404908	10.46959875	1.39E-06	4.10E-05	5.901023412	-	-
lnc-CPLX1-2	2.488128158	8.333225802	10.46662686	1.40E-06	4.11E-05	5.909103737	-	-
lnc-FOXM1-1	6.811970142	3.888568442	10.45231117	1.42E-06	4.15E-05	5.899279087	-	-
lnc-ZFAT-6	-5.584381004	1.186579742	-10.4487659	1.42E-06	4.16E-05	5.850482492	-	-
lnc-VIPR1-1	3.661956454	9.122257814	10.42879193	1.44E-06	4.23E-05	5.866730589	-	-
lnc-KAT8-2	4.544458465	1.404158266	10.41260632	1.46E-06	4.28E-05	5.864811428	-	-
lnc-TOX4-1	4.972211719	1.477651319	10.40479879	1.47E-06	4.30E-05	5.844119518	-	-
lnc-MBTPS2-1	-5.054901601	1.518837946	-10.40306213	1.48E-06	4.30E-05	5.724449105	-	-
lnc-EBNA1BP2-1	3.996493823	0.934396164	10.39496223	1.49E-06	4.32E-05	5.852026326	-	-
XLOC_2840559	2.810011696	10.28739493	10.39389763	1.49E-06	4.32E-05	5.83978247	-	-
lnc-TSHZ3-2	6.213525672	3.56879139	10.35734477	1.54E-06	4.45E-05	5.815637196	-	-
lnc-NDUFB3-3	3.541942482	5.810657174	10.34313248	1.55E-06	4.50E-05	5.684361943	-	-
lnc-SMCR7-2	6.433234825	2.994095618	10.33464579	1.57E-06	4.53E-05	5.80096611	-	-
lnc-AC011551.1-1	3.061307123	10.72838985	10.32729495	1.58E-06	4.54E-05	5.778965022	-	-
XLOC_236009	6.071452816	1.841103789	10.32332292	1.58E-06	4.56E-05	5.759859076	-	-
lnc-RHBDD3-1	-5.081510868	0.994468931	-10.3194647	1.59E-06	4.57E-05	5.731235245	-	-
LINC00689	4.816851864	2.646990047	10.31790272	1.59E-06	4.57E-05	5.763426864	-	-
lnc-KIAA1919-8	4.153552305	0.574443499	10.30488922	1.61E-06	4.62E-05	5.758529872	-	-
lnc-GPR98-8	7.793133629	4.326315544	10.30042514	1.61E-06	4.62E-05	5.770139741	-	-
lnc-CS-1	5.034414081	0.836558106	10.29707538	1.62E-06	4.63E-05	5.756697023	-	-
lnc-C16orf61-1	6.152022225	3.564175263	10.29215495	1.62E-06	4.65E-05	5.764280046	-	-
MTUS2-AS2	-5.379523921	1.872150109	-10.28437553	1.64E-06	4.67E-05	5.759190144	-	-
lnc-NQO2-14	2.607728284	10.37666444	10.2569722	1.67E-06	4.77E-05	5.723011667	-	-
lnc-NDUFAB1-1	7.726831783	5.77759291	10.24795518	1.69E-06	4.81E-05	5.68715609	-	-
lnc-ZFC3H1-4	4.625941183	0.872488897	10.24455352	1.69E-06	4.82E-05	5.705741474	-	-
lnc-KHDRBS3-9	-5.934377549	1.257867242	-10.24218587	1.70E-06	4.82E-05	5.66965929	-	-
lnc-B4GALT7-1	6.734240002	4.228792021	10.21689201	1.73E-06	4.91E-05	5.700593588	-	-
lnc-RUNX1-4	4.405598623	0.629073995	10.21455216	1.74E-06	4.91E-05	5.68829517	-	-
lnc-PLA2G2D-1	5.977509377	2.643386905	10.2102095	1.74E-06	4.93E-05	5.69417287	-	-
lnc-ECHDC3-1	4.592148499	1.520980397	10.20260564	1.76E-06	4.96E-05	5.680660799	-	-
XLOC_2219057	4.112443551	0.671981242	10.19777616	1.76E-06	4.98E-05	5.666783473	-	-
lnc-MSI2-5	7.875179778	5.373954174	10.19084999	1.77E-06	5.00E-05	5.680978171	-	-
lnc-RPL19-6	-5.01194071	0.95362588	-10.17160625	1.80E-06	5.07E-05	5.616155096	-	-
lnc-SMG6-3	8.706858498	5.879822657	10.1623348	1.82E-06	5.11E-05	5.649826479	-	-
lnc-NBN-1	-4.891211421	0.992190202	-10.13942821	1.86E-06	5.21E-05	5.588213392	-	-
lnc-CXADR-1	5.131194633	2.112850859	10.12867164	1.87E-06	5.24E-05	5.595545622	-	-
lnc-C1orf43-4	6.348510486	4.535400352	10.12244665	1.88E-06	5.26E-05	5.622009423	-	-
lnc-GINS1-4	4.353339788	0.610561665	10.10797055	1.91E-06	5.32E-05	5.599273956	-	-
lnc-WDR83OS-1	7.595533904	4.825189106	10.10056515	1.92E-06	5.35E-05	5.596210381	-	-
lnc-IL17RA-13	-4.740575077	1.502027973	-10.0967529	1.93E-06	5.36E-05	5.488515871	-	-
MRVI1-AS1	7.524444943	5.138809054	10.0956192	1.93E-06	5.37E-05	5.592396557	-	-
lnc-C15orf48-1	5.66387001	3.790434785	10.0871269	1.94E-06	5.40E-05	5.584445602	-	-
lnc-NUB1-4	3.467664904	7.777217417	10.08122497	1.95E-06	5.42E-05	5.566167067	-	-
RRM1-AS1	6.226212209	1.277686587	10.05937867	1.99E-06	5.52E-05	5.543854429	-	-
lnc-IKBIP-1	6.887371168	4.393949982	10.04926067	2.01E-06	5.56E-05	5.560884803	-	-
lnc-MYO19-2	-5.379289384	1.13139645	-10.04434038	2.02E-06	5.58E-05	5.509890192	-	-
lnc-ARHGEF26-3	6.030963233	4.275138448	10.03124471	2.04E-06	5.63E-05	5.538492024	-	-
lnc-ASB5-1	6.173339757	4.418882652	10.03058049	2.04E-06	5.63E-05	5.544106425	-	-
lnc-DNASE1L1-1	3.734732897	11.1170654	10.00329996	2.09E-06	5.76E-05	5.506149409	-	-
lnc-ATF7IP2-1	4.97825141	4.521975262	10.00074625	2.10E-06	5.77E-05	5.501220428	-	-
lnc-FIGNL1-1	4.527225048	4.118542123	9.996843301	2.10E-06	5.79E-05	5.45379523	-	-
ALKBH3-AS1	3.98566084	0.581832626	9.987578021	2.12E-06	5.83E-05	5.491495891	-	-
lnc-PPP4R1L-1	7.570381989	3.803530386	9.984941672	2.13E-06	5.84E-05	5.504846758	-	-
lnc-C6orf146-3	-4.90544664	1.092883362	-9.975912478	2.14E-06	5.88E-05	5.443926435	-	-
XLOC_1828024	-5.82434521	2.256614048	-9.974677728	2.15E-06	5.88E-05	5.494191296	-	-
lnc-TBP-3	7.658240464	4.58996253	9.974138996	2.15E-06	5.88E-05	5.494069586	-	-
lnc-HAND1-3	5.799301759	4.113668328	9.973751358	2.15E-06	5.88E-05	5.494950115	-	-
XLOC_2839990	-7.708844993	4.012372565	-9.960460556	2.17E-06	5.94E-05	5.483945566	-	-
XLOC_1232275	5.236055186	1.021249171	9.945398032	2.20E-06	6.01E-05	5.45810969	-	-
XLOC_2031508	7.444657548	4.440291982	9.944164594	2.21E-06	6.01E-05	5.464308309	-	-
lnc-CCDC51-1	7.144703131	5.945950851	9.939378131	2.21E-06	6.03E-05	5.465207741	-	-
lnc-H3F3B-1	4.923225433	3.238387898	9.932453077	2.23E-06	6.06E-05	5.455044158	-	-
lnc-CAMKMT-1	-5.615026698	1.216306238	-9.929622314	2.23E-06	6.07E-05	5.445842426	-	-
lnc-PSME1-1	6.262513967	4.15600229	9.92259183	2.25E-06	6.10E-05	5.444413828	-	-
XLOC_2558202	-4.224790017	1.002223197	-9.913906728	2.27E-06	6.15E-05	5.404954093	-	-
lnc-ARL4D-1	6.523461062	3.531582539	9.898951823	2.30E-06	6.22E-05	5.430484274	-	-
lnc-C7orf45-1	5.182201723	2.212284036	9.886834022	2.32E-06	6.28E-05	5.413495161	-	-
lnc-SEC23A-3	6.454495772	3.230614066	9.880231184	2.34E-06	6.30E-05	5.413655491	-	-
TNRC6C-AS1	4.814207087	0.803391626	9.876993347	2.34E-06	6.32E-05	5.401579799	-	-
lnc-SRSF5-2	4.402170131	7.001442033	9.872037212	2.35E-06	6.33E-05	5.376326421	-	-
lnc-DALRD3-1	8.191339048	5.387163995	9.866285856	2.36E-06	6.36E-05	5.400465128	-	-
lnc-LEPROTL1-9	-4.46716279	0.876278608	-9.864186861	2.37E-06	6.37E-05	5.347438204	-	-
lnc-GCC1-1	3.374833343	7.260417549	9.857387577	2.38E-06	6.40E-05	5.266833513	-	-
lnc-ZSCAN21-1	8.238541275	4.944776393	9.856803265	2.38E-06	6.40E-05	5.393320673	-	-
lnc-FAM162A-2	7.618180476	4.864703614	9.848597101	2.40E-06	6.44E-05	5.386082593	-	-
TTC3-AS1	7.721613573	4.880924066	9.829173258	2.44E-06	6.55E-05	5.368969875	-	-
lnc-PRDM4-4	5.307000904	3.169699493	9.806584647	2.50E-06	6.68E-05	5.347090533	-	-
lnc-NBPF9-4	-4.87898052	1.03390461	-9.796214269	2.52E-06	6.73E-05	5.298884032	-	-
lnc-ARMC6-1	2.743167971	6.825955315	9.794192724	2.52E-06	6.73E-05	5.226206322	-	-
MIR205HG	-4.679839579	0.908200286	-9.78501831	2.54E-06	6.78E-05	5.288485078	-	-
lnc-FBXO34-5	-6.161134428	1.407189615	-9.775443043	2.57E-06	6.83E-05	5.305152592	-	-
XLOC_2840072	-4.990459353	1.825121083	-9.764234463	2.59E-06	6.88E-05	5.308615114	-	-
lnc-SGSM2-1	3.160293709	6.046550133	9.760526871	2.60E-06	6.90E-05	5.304499687	-	-
lnc-ATP5F1-2	4.934587627	0.847533755	9.721404601	2.70E-06	7.13E-05	5.266936943	-	-
lnc-C9orf3-6	6.248164575	3.237259927	9.721100097	2.70E-06	7.13E-05	5.27357368	-	-
lnc-LMTK3-1	4.922728208	1.10342541	9.71596368	2.71E-06	7.16E-05	5.263101861	-	-
lnc-PHB2-4	3.477704473	9.9807326	9.685501645	2.78E-06	7.33E-05	5.240172607	-	-
lnc-MAP1LC3B-1	-4.387916722	1.255132628	-9.675519527	2.81E-06	7.39E-05	5.183747278	-	-
lnc-ZNF44-1	5.947212028	4.181966574	9.674208163	2.81E-06	7.40E-05	5.226509688	-	-
lnc-PCK1-4	-4.595409969	0.812293062	-9.667001506	2.83E-06	7.44E-05	5.193739135	-	-
lnc-RP3-377D14.1.1-7	-5.602829659	2.822792414	-9.654384769	2.86E-06	7.52E-05	5.187355132	-	-
lnc-TMSB15A-5	7.767627634	4.95427661	9.643133116	2.89E-06	7.58E-05	5.203461827	-	-
lnc-LUZP1-3	8.055135421	6.002219108	9.633817769	2.92E-06	7.64E-05	5.195106464	-	-
lnc-AC007390.5.1-1	6.290093833	2.896378185	9.630962646	2.93E-06	7.65E-05	5.191217709	-	-
lnc-SWSAP1-1	3.569671942	1.357074226	9.621953302	2.95E-06	7.70E-05	5.18486944	-	-
lnc-NPHS2-3	4.889920347	1.53193041	9.61966557	2.96E-06	7.71E-05	5.182791261	-	-
lnc-DKK4-5	5.801410579	3.733195322	9.603028915	3.00E-06	7.82E-05	5.167853172	-	-
lnc-FAM207A-8	6.179063222	2.633377904	9.578030531	3.07E-06	8.00E-05	5.145312261	-	-
lnc-NAALADL2-8	-5.488834814	1.723834343	-9.571822373	3.09E-06	8.03E-05	5.072886841	-	-
lnc-C9orf43-1	8.566722002	5.480247844	9.563191684	3.11E-06	8.08E-05	5.131932453	-	-
lnc-TNFAIP3-5	-6.100919007	1.290632704	-9.562798303	3.12E-06	8.08E-05	5.130319462	-	-
lnc-VWDE-1	5.003920533	2.81182448	9.544711909	3.17E-06	8.20E-05	5.115030247	-	-
lnc-AC107021.1-9	-5.104492288	1.511468298	-9.531815277	3.21E-06	8.29E-05	5.030653557	-	-
lnc-SIRPG-1	-5.925104011	1.366510441	-9.531535653	3.21E-06	8.29E-05	5.102408626	-	-
lnc-ZC3H6-3	4.787667129	0.964668114	9.529733585	3.21E-06	8.30E-05	5.096231832	-	-
lnc-PFDN4-3	4.716099232	1.537909097	9.513344833	3.26E-06	8.41E-05	5.083494075	-	-
lnc-SHARPIN-2	3.891131822	5.63308246	9.501661184	3.30E-06	8.50E-05	4.960971592	-	-
lnc-STYX-2	3.027028249	7.621066005	9.495833084	3.31E-06	8.53E-05	5.050563591	-	-
lnc-SPRED2-11	8.05105287	4.861943383	9.489736546	3.33E-06	8.57E-05	5.065278798	-	-
lnc-VAC14-1	-4.651002561	1.2618886	-9.470224802	3.39E-06	8.69E-05	5.012339692	-	-
lnc-PRKAR1A-7	3.516130483	0.343461529	9.465821329	3.41E-06	8.72E-05	5.039080812	-	-
lnc-LALBA-1	4.447166179	1.203454687	9.451167277	3.45E-06	8.82E-05	5.018080679	-	-
XLOC_235741	5.445367537	1.709260435	9.439886732	3.49E-06	8.90E-05	5.017651579	-	-
lnc-TPCN2-1	4.599595615	1.785128656	9.436746777	3.50E-06	8.92E-05	4.994146461	-	-
lnc-EIF1AD-1	3.020892987	10.34165631	9.421448959	3.55E-06	9.04E-05	5.001703747	-	-
lnc-C1orf122-1	4.721330304	2.710222964	9.420427872	3.56E-06	9.04E-05	5.002080524	-	-
lnc-PTEN-12	3.608139128	1.364483359	9.415903827	3.57E-06	9.08E-05	4.997659161	-	-
lnc-MBTPS2-2	-4.657501684	1.043325074	-9.406684761	3.60E-06	9.14E-05	4.964155344	-	-
lnc-MAPK6-8	4.668635566	6.342536121	9.398627132	3.63E-06	9.19E-05	4.965371906	-	-
XLOC_1093878	5.437323614	1.004161083	9.397678301	3.63E-06	9.19E-05	4.979708527	-	-
lnc-ARHGAP17-9	3.640393308	0.352500378	9.379931222	3.69E-06	9.33E-05	4.963399382	-	-
lnc-WDR73-9	6.409271258	4.220912585	9.379210213	3.69E-06	9.33E-05	4.964090166	-	-
lnc-REST-4	5.805045959	1.590415288	9.359066009	3.77E-06	9.50E-05	4.938208488	-	-
lnc-C1S-1	5.61128102	2.987226951	9.357414753	3.77E-06	9.51E-05	4.943568929	-	-
lnc-GK-3	4.513782712	2.401753843	9.334970266	3.85E-06	9.70E-05	4.923931585	-	-
lnc-VCL-2	4.117758252	0.690928554	9.328454027	3.87E-06	9.74E-05	4.914125283	-	-
lnc-CD226-5	-5.955127552	1.318035418	-9.32100746	3.90E-06	9.80E-05	4.909471703	-	-
MYCBP2-AS1	8.178033044	4.614399812	9.318538623	3.91E-06	9.81E-05	4.907563615	-	-
XLOC_753555	5.686408166	3.004841444	9.307976191	3.95E-06	9.90E-05	4.891697508	-	-
XLOC_1623377	5.837595033	3.685614701	9.304489737	3.96E-06	9.93E-05	4.895074732	-	-
lnc-DHX38-4	4.732523156	0.857220835	9.296742087	3.99E-06	9.99E-05	4.88457767	-	-
lnc-ASPRV1-2	6.278864158	3.152044836	9.295301527	4.00E-06	9.99E-05	4.886748221	-	-
XLOC_2557495	6.374762384	6.94772137	9.285875843	4.03E-06	0.000100768	4.871108197	-	-
lnc-HPGD-2	4.787740991	0.889786664	9.28394527	4.04E-06	0.000100891	4.87295827	-	-
lnc-STON1-1	-5.721587155	1.209922319	-9.278688442	4.06E-06	0.000101272	4.871919878	-	-
lnc-MRPS24-2	6.320513049	3.671550685	9.263934851	4.12E-06	0.000102484	4.85834029	-	-
lnc-TMEM240-1	4.411313551	1.281567442	9.26357581	4.12E-06	0.000102484	4.850958494	-	-
lnc-TMEM147-1	5.781958214	2.431133041	9.257730676	4.14E-06	0.00010293	4.850971979	-	-
lnc-ZNF583-5	5.583353707	3.061803561	9.231675627	4.25E-06	0.000105251	4.828364438	-	-
XLOC_378454	3.465755876	8.338169203	9.212393842	4.32E-06	0.000107004	4.810234202	-	-
lnc-NNT-3	5.105831182	1.637271443	9.207835911	4.34E-06	0.000107404	4.805726425	-	-
lnc-ZNF30-1	-4.813920889	1.40782661	-9.204406537	4.36E-06	0.000107536	4.76294362	-	-
lnc-HCN4-2	5.23655953	0.942869924	9.204059675	4.36E-06	0.000107536	4.802364221	-	-
XLOC_1175427	5.770499852	3.547341249	9.186558946	4.43E-06	0.000109084	4.785048808	-	-
TMEM161B-AS1	-6.418300949	2.4781952	-9.176403053	4.47E-06	0.000110014	4.775893135	-	-
lnc-C8orf48-7	-5.707110892	1.258794739	-9.175506959	4.48E-06	0.000110043	4.77324399	-	-
lnc-C6orf164-2	-5.939819238	1.245225437	-9.171911255	4.49E-06	0.000110356	4.772877129	-	-
lnc-NEURL2-1	4.496522655	2.019011585	9.164157445	4.53E-06	0.00011098	4.764800679	-	-
lnc-ARPC4-3	4.190421726	0.570841891	9.156665997	4.56E-06	0.000111645	4.758346942	-	-
lnc-KIAA0020-2	4.044332445	0.727431627	9.151630196	4.58E-06	0.000112117	4.752003229	-	-
lnc-CHRAC1-7	7.125052685	4.34963685	9.144128572	4.61E-06	0.000112857	4.746942039	-	-
lnc-ARHGAP28-7	8.124472472	6.405603816	9.141830119	4.62E-06	0.000113039	4.744493734	-	-
lnc-SLC5A2-3	3.312339063	5.121492781	9.126678709	4.69E-06	0.000114422	4.728428891	-	-
lnc-NECAB1-2	-5.958708541	1.279110213	-9.119784226	4.72E-06	0.000115038	4.724114848	-	-
lnc-C17orf80-6	4.48717788	0.802581205	9.117605963	4.73E-06	0.000115151	4.720054087	-	-
lnc-MRPL39-20	4.125115376	1.569120231	9.10209314	4.80E-06	0.000116672	4.7058923	-	-
XLOC_1013595	-4.445258232	0.871613315	-9.098506469	4.82E-06	0.000117006	4.68757715	-	-
lnc-C2CD4A-9	6.457899577	1.368430832	9.094538244	4.84E-06	0.000117385	4.697560249	-	-
XLOC_2712228	4.494413669	0.725239736	9.075689653	4.93E-06	0.000119252	4.68227032	-	-
lnc-SEPT7L-2	-4.355140038	1.022996692	-9.069852385	4.96E-06	0.000119785	4.677284319	-	-
lnc-DUSP14-5	4.66313527	0.760123709	9.066707318	4.97E-06	0.000120078	4.674006476	-	-
lnc-RABL2A-5	5.093033002	2.742263766	9.053993702	5.03E-06	0.000121347	4.660466453	-	-
lnc-GLUD1-2	5.208521203	1.080674213	9.040972096	5.09E-06	0.000122667	4.648762841	-	-
lnc-MYLPF-3	3.074298729	7.573211566	9.01900126	5.20E-06	0.000124899	4.626754557	-	-
lnc-C6orf112-8	5.904372247	3.452751472	9.017814257	5.21E-06	0.000124899	4.625367831	-	-
XLOC_000029	-4.472625231	0.98869522	-9.017528489	5.21E-06	0.000124899	4.605548823	-	-
lnc-C8orf42-4	7.800443461	4.471899789	9.015435408	5.22E-06	0.000124971	4.62170207	-	-
lnc-MKI67IP-8	6.037004904	1.232376781	9.010176315	5.25E-06	0.000125502	4.621001913	-	-
lnc-PTPN6-1	5.271626259	2.780966196	9.007525286	5.26E-06	0.000125752	4.616916347	-	-
EAF1-AS1	7.096335288	7.026017307	9.005244897	5.27E-06	0.000125958	4.616095731	-	-
lnc-ZNF101-4	6.110133313	1.24523062	8.993578875	5.33E-06	0.00012717	4.603578082	-	-
lnc-TMEM116-1	5.824066889	3.3802365	8.964377911	5.49E-06	0.000130277	4.573759826	-	-
lnc-CLDN15-2	4.539334112	0.701480353	8.963998764	5.49E-06	0.000130277	4.577244131	-	-
lnc-RPS24-3	-4.307158828	1.1816745	-8.959615032	5.51E-06	0.000130644	4.549741471	-	-
lnc-SCARB2-1	3.811770468	0.438604106	8.95950333	5.51E-06	0.000130644	4.572989268	-	-
lnc-ANKRD27-6	4.535989724	1.25706345	8.959348052	5.51E-06	0.000130644	4.568332959	-	-
LINC00466	-4.694525172	1.323077851	-8.956056664	5.53E-06	0.00013084	4.541531342	-	-
lnc-TULP4-1	6.061272202	1.248313356	8.955296994	5.54E-06	0.000130843	4.567840176	-	-
lnc-YPEL5-1	-4.966354478	0.987169977	-8.954412715	5.54E-06	0.000130843	4.558813962	-	-
XLOC_1621640	5.167705376	0.940928317	8.954286327	5.54E-06	0.000130843	4.568005277	-	-
lnc-OR4F16-8	5.319583705	3.274005082	8.945554583	5.59E-06	0.00013181	4.55462055	-	-
lnc-LETM2-2	6.348561469	3.536514702	8.936658721	5.64E-06	0.00013241	4.549868889	-	-
XLOC_1231971	6.348453127	4.484773029	8.936452855	5.64E-06	0.00013241	4.546895544	-	-
DLGAP4-AS1	5.112543521	6.191893596	8.93641529	5.64E-06	0.00013241	4.549889238	-	-
ZNF793-AS1	4.972707443	1.808651431	8.936273982	5.64E-06	0.00013241	4.546057643	-	-
lnc-IRS2-8	-5.528022684	1.1122463	-8.935683257	5.64E-06	0.00013241	4.549527803	-	-
lnc-TATDN1-2	4.677713672	4.891288906	8.927297588	5.69E-06	0.00013342	4.540069062	-	-
lnc-WNT8A-2	3.365842224	5.330930476	8.925322507	5.70E-06	0.000133567	4.492548211	-	-
lnc-TOP1MT-5	5.357031971	3.337816261	8.92262581	5.71E-06	0.000133786	4.533440003	-	-
lnc-SLC25A47-5	3.803138571	1.702592122	8.909788286	5.79E-06	0.000135187	4.522477242	-	-
lnc-HHIPL1-2	3.030003393	8.803448666	8.907717759	5.80E-06	0.000135385	4.523551576	-	-
TRG-AS1	5.614954873	2.650834073	8.905069627	5.81E-06	0.000135583	4.515225582	-	-
lnc-AL033381.1-8	-4.852174176	0.92070033	-8.894392625	5.87E-06	0.000136548	4.510326532	-	-
lnc-OXNAD1-6	5.694341874	3.232778374	8.886210511	5.92E-06	0.000137491	4.497667043	-	-
lnc-RFC2-5	-5.089599713	1.039440718	-8.88105271	5.95E-06	0.00013811	4.490883704	-	-
lnc-LY86-4	-6.393167025	1.431188573	-8.861413933	6.07E-06	0.000140401	4.478058976	-	-
lnc-SGCG-11	6.460207474	3.851023021	8.844648335	6.17E-06	0.000142492	4.457855479	-	-
lnc-ZBTB25-5	4.88791112	0.817883041	8.841268784	6.19E-06	0.000142887	4.459853312	-	-
lnc-TCTA-1	6.338103807	4.456317272	8.837474104	6.21E-06	0.000143341	4.451056619	-	-
lnc-KCNS3-11	3.912925869	0.472890945	8.815654922	6.35E-06	0.000146288	4.435200166	-	-
lnc-TNNT1-1	-5.5446512	1.134048521	-8.810524473	6.38E-06	0.000146915	4.428462748	-	-
lnc-SLC22A23-1	4.999879688	5.117239308	8.794001348	6.48E-06	0.000148867	4.413932284	-	-
lnc-IGFN1-5	-4.417063655	0.93404333	-8.788810104	6.52E-06	0.000149549	4.400334855	-	-
ARHGEF19-AS1	2.960377291	0.558824781	8.787904768	6.52E-06	0.0001496	4.400501441	-	-
lnc-NDUFB9-1	5.670912372	1.169802403	8.782951286	6.55E-06	0.000150156	4.403605647	-	-
lnc-SMG1-2	7.011136311	3.758565305	8.781314185	6.56E-06	0.000150247	4.396138986	-	-
lnc-GTF2E2-2	6.046835326	3.889017885	8.77973353	6.57E-06	0.000150399	4.39344703	-	-
lnc-DISC1-1	-5.193824714	1.122682945	-8.770718913	6.63E-06	0.000151661	4.387502203	-	-
XLOC_2834725	-6.801525616	4.521054803	-8.76928141	6.64E-06	0.000151711	4.39040109	-	-
lnc-ARHGAP26-4	-4.579281363	1.464478855	-8.750753157	6.77E-06	0.000154403	4.339882572	-	-
lnc-CEMP1-5	3.211874926	8.742696686	8.750390094	6.77E-06	0.000154403	4.372500236	-	-
XLOC_930843	4.745933963	0.789513553	8.737421834	6.85E-06	0.000156229	4.359279718	-	-
XLOC_753809	5.911983766	4.114789646	8.70982787	7.05E-06	0.000160216	4.328570816	-	-
lnc-C2orf89-2	5.309397382	2.660173859	8.707066357	7.06E-06	0.000160482	4.327085983	-	-
lnc-CLDN6-4	4.896101596	3.295028875	8.704763828	7.08E-06	0.000160762	4.322913168	-	-
lnc-NOTCH2-2	-4.097101666	1.613828684	-8.692131277	7.17E-06	0.00016253	4.313868551	-	-
TH2LCRR	6.532153145	3.981747708	8.681566986	7.25E-06	0.000164071	4.298521934	-	-
lnc-ATPAF2-2	3.822620485	7.898308833	8.674111178	7.30E-06	0.000165116	4.2849303	-	-
XLOC_2217825	-4.196185017	1.053399538	-8.66673387	7.35E-06	0.000166142	4.286025362	-	-
lnc-CSNK1A1-1	4.196224301	2.274136566	8.666272348	7.36E-06	0.000166142	4.288935241	-	-
lnc-LYRM2-2	5.456216362	2.382269294	8.658931316	7.41E-06	0.000167093	4.27471145	-	-
lnc-CTD-2368P22.1.1-2	4.966313922	0.848741632	8.643052776	7.53E-06	0.000169581	4.266879932	-	-
BZRAP1-AS1	5.095316171	1.490928144	8.631547874	7.62E-06	0.000171359	4.25597691	-	-
lnc-EFCAB5-2	3.412382507	0.346640952	8.610726139	7.78E-06	0.000174408	4.236255606	-	-
XLOC_753260	7.419745762	2.327718627	8.60705877	7.81E-06	0.000174957	4.233231898	-	-
lnc-AC020907.3-2	5.075327007	0.891203179	8.581724758	8.01E-06	0.000178985	4.206304532	-	-
lnc-CKS1B-2	6.486731506	1.461247836	8.573543063	8.07E-06	0.000180271	4.200360451	-	-
lnc-EPN1-6	4.269592563	1.146544154	8.57276141	8.08E-06	0.000180316	4.197485476	-	-
XLOC_1622314	5.654656654	3.777342381	8.557353374	8.21E-06	0.000182843	4.173346428	-	-
lnc-PUS7-2	6.159542872	1.857609833	8.553205171	8.24E-06	0.000183413	4.171787723	-	-
lnc-NDUFS6-16	3.85314605	0.456083737	8.544741902	8.31E-06	0.00018469	4.170880551	-	-
lnc-PPDPF-3	4.55186144	0.793776345	8.541713191	8.34E-06	0.000185137	4.168044053	-	-
lnc-PLXND1-2	5.525804802	3.796955121	8.540837781	8.34E-06	0.000185137	4.161480985	-	-
lnc-C7orf10-4	2.722096579	6.319677291	8.540240123	8.35E-06	0.000185137	4.125455419	-	-
XLOC_1830341	4.145286537	1.338365067	8.53415692	8.40E-06	0.000186179	4.156058365	-	-
lnc-RPL24-1	4.568617466	0.798175024	8.517268362	8.55E-06	0.000189183	4.143753932	-	-
lnc-GNA11-3	3.330078484	10.28128068	8.513652551	8.58E-06	0.000189776	4.14143467	-	-
lnc-ANKRD50-3	-3.891444092	0.584249938	-8.51104765	8.60E-06	0.000190176	4.13433943	-	-
lnc-AMELY-10	4.811002735	0.812090617	8.501521517	8.68E-06	0.000191613	4.126484355	-	-
lnc-PRKAB2-1	5.554888077	3.717921657	8.498856394	8.71E-06	0.000191929	4.119912245	-	-
lnc-C17orf97-5	3.667406698	7.781370269	8.488487468	8.80E-06	0.000193854	4.105334308	-	-
XLOC_1174749	5.752062539	1.97633356	8.486688091	8.81E-06	0.000194097	4.114458833	-	-
lnc-RASAL2-3	2.338633668	7.743529527	8.485978963	8.82E-06	0.000194097	4.110758769	-	-
lnc-C6orf52-1	5.865262985	1.795407114	8.483368111	8.84E-06	0.000194453	4.111465672	-	-
lnc-PPP2R3C-4	-5.525991892	1.133184348	-8.482497361	8.85E-06	0.000194519	4.10460297	-	-
lnc-PDE8A-2	-5.17966995	1.207384342	-8.46449972	9.01E-06	0.000197591	4.092777379	-	-
XLOC_2712799	4.359950187	0.781820289	8.459114699	9.06E-06	0.000198468	4.08657467	-	-
XLOC_2557962	3.132322374	0.325335757	8.456119155	9.09E-06	0.000198969	4.083563455	-	-
lnc-ZNF791-10	6.26988791	1.305239398	8.45206577	9.13E-06	0.000199687	4.079674641	-	-
lnc-RIMBP3C-3	4.581604225	1.474501231	8.426533234	9.37E-06	0.000204695	4.051589531	-	-
lnc-DNAH5-4	-5.271471139	1.17168751	-8.369538507	9.93E-06	0.000216004	3.997625382	-	-
lnc-RP11-116D17.1.1-4	-5.15969987	1.207699814	-8.365948785	9.97E-06	0.000216576	3.994689191	-	-
lnc-CAPN2-2	5.281310854	2.7448528	8.365366052	9.97E-06	0.000216593	3.976450518	-	-
lnc-PCGF2-3	2.753795214	10.07418663	8.360086358	1.00E-05	0.00021743	3.984304345	-	-
lnc-TUBA1C-1	2.866776397	9.56493376	8.337365266	1.03E-05	0.000221989	3.963931949	-	-
XLOC_1233735	4.319851689	0.702212621	8.331028618	1.03E-05	0.00022321	3.958640369	-	-
lnc-UTY-1	3.778956081	0.407719888	8.315206564	1.05E-05	0.000226175	3.938746866	-	-
XLOC_1830773	-5.865442593	2.315837239	-8.306280009	1.06E-05	0.000228031	3.916762545	-	-
lnc-UBE2N-1	-5.336738451	1.148390656	-8.302095783	1.06E-05	0.0002289	3.930715562	-	-
lnc-MACC1-1	4.107770324	5.731451603	8.297281705	1.07E-05	0.000229804	3.906321843	-	-
lnc-SLC30A4-2	4.387690606	8.235843412	8.292034454	1.08E-05	0.000230933	3.918218616	-	-
lnc-FAM178A-1	4.551245835	2.096031215	8.281255455	1.09E-05	0.000233084	3.89949068	-	-
lnc-EFEMP1-8	3.978545677	0.905451135	8.280087239	1.09E-05	0.000233084	3.90560014	-	-
XLOC_1015300	3.730334568	1.844486702	8.261721264	1.11E-05	0.000237192	3.875708842	-	-
XLOC_517115	4.020742181	0.519913791	8.246229373	1.13E-05	0.000240539	3.868043254	-	-
lnc-TREX1-2	4.573373309	6.824394066	8.236131023	1.14E-05	0.000242825	3.862137859	-	-
lnc-BRD7-3	6.480059224	2.967760975	8.223793513	1.15E-05	0.000245707	3.833189118	-	-
lnc-SOX15-4	2.970205719	5.900225226	8.213387732	1.17E-05	0.000247749	3.83221403	-	-
XLOC_2558569	-4.61452181	0.877817649	-8.205090173	1.18E-05	0.000249518	3.832913237	-	-
lnc-SCGB2B2-7	-4.945012035	1.145825219	-8.197604487	1.19E-05	0.000251216	3.825320484	-	-
lnc-CLUAP1-2	4.718690259	1.377462684	8.195665926	1.19E-05	0.000251492	3.818302221	-	-
lnc-DTHD1-5	-5.680020765	1.225479697	-8.182015113	1.21E-05	0.000254431	3.802835691	-	-
lnc-DR1-1	5.624688845	3.265936431	8.177777281	1.21E-05	0.000255301	3.790854108	-	-
lnc-NR2F2-7	-5.881022678	1.302651139	-8.162237843	1.23E-05	0.000258957	3.775639657	-	-
lnc-FBXO45-3	5.050059164	1.888260574	8.157552135	1.24E-05	0.000260098	3.77959527	-	-
lnc-DUOX2-1	4.631938067	10.72882131	8.153478026	1.24E-05	0.000261022	3.769194082	-	-
lnc-COQ9-1	4.652974917	4.754057898	8.148228278	1.25E-05	0.000262253	3.752750862	-	-
lnc-SPTBN5-1	5.963735049	3.91553548	8.130945493	1.27E-05	0.000266643	3.734791275	-	-
LINC01535	-5.029883838	1.021697797	-8.106278396	1.31E-05	0.000272953	3.719881842	-	-
lnc-RD3-5	7.006098912	4.33812935	8.102060315	1.31E-05	0.000273892	3.727804525	-	-
XLOC_2030363	4.062206538	0.529549349	8.078971183	1.34E-05	0.00028007	3.694151558	-	-
lnc-NTSR2-6	2.869494611	10.70390138	8.077684527	1.35E-05	0.00028031	3.68864191	-	-
lnc-AL391421.1-2	2.773354731	8.492935541	8.070611591	1.36E-05	0.000282267	3.680226126	-	-
lnc-C7orf71-4	6.362226691	4.040325961	8.069747868	1.36E-05	0.000282383	3.687294588	-	-
lnc-RP11-173D9.3.1-3	-5.198172834	1.621203634	-8.04271765	1.40E-05	0.000289694	3.664613068	-	-
lnc-ZC3H12B-12	3.63529001	5.995776534	8.03839945	1.40E-05	0.000290876	3.662114393	-	-
lnc-ABCA5-7	4.849613496	3.415786629	8.027097196	1.42E-05	0.000293793	3.641764989	-	-
lnc-MNT-1	2.599040501	8.230512221	8.021795427	1.43E-05	0.000295301	3.632373461	-	-
lnc-FAM177A1-1	5.822653189	1.909447635	8.019093918	1.43E-05	0.000295855	3.634640819	-	-
lnc-ATM-2	7.379525757	3.744020016	8.000377869	1.46E-05	0.000301191	3.596594956	-	-
XLOC_1230810	6.792965933	3.999575322	7.994157623	1.47E-05	0.000302855	3.594535032	-	-
lnc-AC087491.2.1-1	4.110586675	0.724001736	7.993182813	1.47E-05	0.000302903	3.608589359	-	-
lnc-NCOA3-9	-4.801029166	2.08100629	-7.992183458	1.47E-05	0.000303075	3.591150334	-	-
lnc-SGSH-1	5.566973178	3.192045888	7.988362379	1.48E-05	0.000303825	3.581144247	-	-
lnc-BASP1-1	3.592838557	4.902971649	7.988006554	1.48E-05	0.000303825	3.588156363	-	-
lnc-AP3S1-9	4.260876748	0.615421968	7.970401162	1.51E-05	0.000309113	3.579606828	-	-
lnc-RGS20-1	4.019219833	7.946348686	7.967088359	1.51E-05	0.000309901	3.583754297	-	-
lnc-ARF6-1	3.943794371	16.5554164	7.966573451	1.51E-05	0.00030992	3.57844469	-	-
lnc-S100A13-2	3.030770033	5.872184011	7.962922243	1.52E-05	0.000310975	3.56802788	-	-
lnc-KIAA0087-2	4.919890352	0.89715142	7.960974797	1.52E-05	0.000311164	3.569373146	-	-
lnc-MTBP-4	5.651862014	1.857266123	7.958572167	1.53E-05	0.000311809	3.569964182	-	-
lnc-FAM135A-3	4.122134793	1.32243359	7.950211009	1.54E-05	0.000314448	3.57169024	-	-
lnc-ARID5A-2	6.194477999	3.984013164	7.945319692	1.55E-05	0.000315631	3.536215412	-	-
XLOC_004358	2.597478934	5.560699107	7.938503204	1.56E-05	0.000317626	3.554598832	-	-
XLOC_1622112	3.735775556	0.402420059	7.937108357	1.56E-05	0.000317945	3.544467435	-	-
lnc-CDCP2-1	3.140830672	0.227018837	7.926581035	1.58E-05	0.000321385	3.535990982	-	-
lnc-ZNF682-3	3.005490345	1.400951083	7.92295488	1.59E-05	0.000322476	3.52880683	-	-
lnc-NEMF-1	8.198142001	3.374731021	7.92186136	1.59E-05	0.000322697	3.53480995	-	-
lnc-ATG13-1	4.13341139	0.570506068	7.915699673	1.60E-05	0.000324379	3.52144718	-	-
lnc-FBXO11-1	-4.815689435	1.514477737	-7.891579546	1.64E-05	0.000332527	3.510326101	-	-
lnc-BASP1-6	4.691455676	2.004814488	7.879051919	1.66E-05	0.000336375	3.467903944	-	-
LINC00959	-5.125354321	1.231569908	-7.875659746	1.67E-05	0.00033744	3.477352872	-	-
XLOC_931668	-4.70738034	1.024874339	-7.872455309	1.67E-05	0.000338113	3.490351727	-	-
B3GALT5-AS1	-5.411775623	1.325926325	-7.864468898	1.69E-05	0.000340699	3.474413511	-	-
lnc-S100A7A-1	-5.960345601	1.509916268	-7.842307491	1.73E-05	0.000347584	3.434481228	-	-
lnc-ATP1B3-2	2.818519648	8.413562104	7.829431052	1.75E-05	0.000351936	3.438283577	-	-
PLCE1-AS2	-5.318055698	1.53800305	-7.81897726	1.77E-05	0.000355589	3.426593389	-	-
lnc-SENP6-12	5.859415563	2.419026233	7.816999646	1.78E-05	0.000356179	3.396257785	-	-
lnc-STARD9-1	7.420894054	4.491055428	7.813809634	1.78E-05	0.000357066	3.394105321	-	-
lnc-MRPS16-1	5.296492226	6.001251418	7.813070723	1.78E-05	0.000357181	3.42225009	-	-
lnc-NAB2-2	4.165291058	6.787440606	7.792291041	1.82E-05	0.000364255	3.40656285	-	-
lnc-C9orf3-5	4.221746949	5.742955004	7.787078631	1.84E-05	0.000366105	3.400955584	-	-
lnc-MORC2-5	-4.752457008	0.929314826	-7.78673368	1.84E-05	0.000366105	3.39862093	-	-
lnc-VSTM2B-9	2.932796437	6.76383836	7.783971529	1.84E-05	0.000366852	3.393722917	-	-
XLOC_2838591	5.525865479	2.772939012	7.776883235	1.86E-05	0.000369155	3.357333504	-	-
lnc-KDM3A-1	6.681078118	4.73510527	7.764341247	1.88E-05	0.000373326	3.343735086	-	-
XLOC_2396188	-7.815500533	5.066442241	-7.744853254	1.92E-05	0.000380055	3.331363278	-	-
lnc-TSSK6-1	3.288651632	6.810312816	7.741520955	1.93E-05	0.000381255	3.343157002	-	-
ZRANB2-AS2	-3.654265125	0.826524362	-7.737929777	1.94E-05	0.000382387	3.348167774	-	-
lnc-G3BP2-1	4.146160209	0.596094865	7.735206488	1.94E-05	0.000383341	3.326807074	-	-
lnc-SMAD4-2	-4.678727401	1.371295274	-7.721374275	1.97E-05	0.000388429	3.331652637	-	-
lnc-C14orf23-2	-5.391370665	1.252172021	-7.716066395	1.98E-05	0.000390316	3.304156319	-	-
lnc-FAM55B-1	3.782262162	0.57443172	7.699695751	2.02E-05	0.000396982	3.293341247	-	-
lnc-FBXW8-2	3.954039623	0.511995398	7.697533378	2.02E-05	0.000397734	3.285797375	-	-
lnc-SHB-1	3.906618117	0.561664506	7.693192156	2.03E-05	0.000399438	3.284909007	-	-
lnc-VMAC-1	5.101308496	3.158434234	7.690076264	2.04E-05	0.000400237	3.267065893	-	-
lnc-C1QL3-1	6.415866801	3.373054653	7.677775906	2.07E-05	0.000404522	3.244098816	-	-
lnc-PRR15L-2	4.334588669	7.204619716	7.662923161	2.10E-05	0.000410009	3.266463516	-	-
XLOC_1829856	6.073200348	3.309664374	7.659259495	2.11E-05	0.000411467	3.258811832	-	-
lnc-NKX2-5-2	4.909578257	0.838196219	7.657308229	2.11E-05	0.000412157	3.249851552	-	-
lnc-CAPN13-1	5.125977428	2.380272828	7.655629162	2.12E-05	0.000412532	3.219008575	-	-
lnc-IFNG-3	5.806015416	1.646831023	7.647601777	2.14E-05	0.000415797	3.228723677	-	-
lnc-ZNF460-2	5.749321688	1.11436802	7.6332508	2.17E-05	0.00042221	3.222141952	-	-
lnc-CHSY1-5	3.023649081	10.96395411	7.631401373	2.17E-05	0.000422676	3.210913047	-	-
lnc-TBL1XR1-6	-6.09683556	1.60714116	-7.630666852	2.18E-05	0.000422745	3.220190629	-	-
lnc-MBD3L1-2	4.290001386	1.783479853	7.609249672	2.23E-05	0.000431709	3.189825276	-	-
lnc-WDSUB1-3	4.595773086	0.907598777	7.60849649	2.23E-05	0.000431867	3.190946971	-	-
lnc-TAS2R42-1	5.002316521	3.80916996	7.6026304	2.25E-05	0.000434268	3.163191082	-	-
lnc-ZNF823-2	4.809208781	2.342105892	7.594028348	2.27E-05	0.000438005	3.15766863	-	-
lnc-DUXA-3	3.659837474	4.726363901	7.591487361	2.27E-05	0.000438677	3.186420915	-	-
lnc-FBXL3-1	5.2306557	1.610033712	7.591146925	2.27E-05	0.000438677	3.179690442	-	-
lnc-RBM10-1	4.375831505	2.826861841	7.590965687	2.27E-05	0.000438677	3.159974928	-	-
lnc-ARL16-1	2.942215096	5.530498222	7.587290647	2.28E-05	0.000440056	3.179990426	-	-
lnc-C5orf45-1	7.279225359	5.339935454	7.584634962	2.29E-05	0.000440783	3.13994132	-	-
lnc-CRBN-1	-3.859574809	0.809954869	-7.584545643	2.29E-05	0.000440783	3.185130656	-	-
lnc-C20orf72-3	4.367727535	1.232973104	7.579509409	2.30E-05	0.000442836	3.176775861	-	-
XLOC_1015137	5.53236738	3.650899504	7.575022947	2.31E-05	0.000444629	3.143633435	-	-
STARD4-AS1	4.384736556	2.293261594	7.572591614	2.32E-05	0.000445469	3.125962072	-	-
lnc-NBAS-15	6.31242082	6.756112119	7.569320669	2.33E-05	0.000446622	3.163022692	-	-
lnc-SLC1A1-6	-5.118858787	0.987157418	-7.568034568	2.33E-05	0.000447054	3.134019675	-	-
lnc-CPM-3	8.311843431	5.351416498	7.567070455	2.33E-05	0.000447121	3.120010094	-	-
lnc-SETDB1-1	4.491372008	6.933890802	7.561283211	2.35E-05	0.000449378	3.155380448	-	-
lnc-RP11-582J16.5.1-4	5.00233067	2.872834182	7.558965636	2.36E-05	0.000450327	3.129912406	-	-
lnc-GLDN-2	5.822808944	1.497847359	7.557626009	2.36E-05	0.00045079	3.138690118	-	-
lnc-C9orf50-2	2.740347453	7.729124539	7.552261942	2.37E-05	0.00045327	3.130095025	-	-
lnc-ZNF791-3	5.39217033	9.717844861	7.549398546	2.38E-05	0.000454297	3.104937748	-	-
lnc-TLCD1-3	4.872164932	2.35703915	7.546386428	2.39E-05	0.000455609	3.099853545	-	-
lnc-VPS13D-1	-4.538515118	1.276085918	-7.537243263	2.41E-05	0.000459626	3.135246794	-	-
lnc-CCDC127-2	-3.928963264	0.579993756	-7.534483203	2.42E-05	0.000460617	3.096367063	-	-
lnc-IL12RB1-2	4.575397671	2.161271729	7.532117804	2.43E-05	0.000461199	3.080746236	-	-
lnc-PLAC8L1-1	3.835986223	0.900611748	7.530607493	2.43E-05	0.000461764	3.079307099	-	-
lnc-PPP4R1-18	7.524221845	6.745046323	7.526556574	2.44E-05	0.000463636	3.094042857	-	-
lnc-ACVR2B-1	4.107000413	1.693592263	7.52321365	2.45E-05	0.000465151	3.071570396	-	-
lnc-MGLL-5	3.920316846	6.7463326	7.503309677	2.51E-05	0.000474062	3.082410428	-	-
lnc-UPB1-2	3.51881936	0.410762735	7.479359089	2.57E-05	0.000485795	3.049844709	-	-
XLOC_1585018	4.79517315	1.450859929	7.473169434	2.59E-05	0.000488944	3.059918766	-	-
lnc-COG3-2	6.06173912	5.681940894	7.458107444	2.64E-05	0.000496351	3.039099189	-	-
lnc-VAT1-1	3.612365658	5.753413797	7.437230339	2.70E-05	0.000506496	3.026554116	-	-
lnc-C1orf85-1	3.280338429	7.433729229	7.431420465	2.72E-05	0.000509578	3.005221643	-	-
lnc-PCK1-2	3.452635291	10.42571064	7.430169729	2.72E-05	0.000509836	2.985947601	-	-
lnc-RIIAD1-3	2.82396224	0.06152392	7.42055541	2.75E-05	0.000514675	2.979224132	-	-
lnc-KMO-1	-5.520705675	1.180132968	-7.416234254	2.76E-05	0.000516947	2.967736999	-	-
lnc-ABHD12B-1	6.828590414	4.584346453	7.411597686	2.78E-05	0.000518951	2.945335911	-	-
lnc-ARF1-1	4.177117844	0.693111098	7.405882385	2.80E-05	0.000522063	2.967378562	-	-
lnc-AHSA2-5	3.089274133	5.096113685	7.392104537	2.84E-05	0.000529274	2.971893414	-	-
lnc-SRPRB-1	3.205722115	6.506892032	7.389768683	2.85E-05	0.000530432	2.975162663	-	-
lnc-COG8-1	2.491736132	8.845230642	7.377953792	2.88E-05	0.000537063	2.927525244	-	-
lnc-KNTC1-3	-4.708954889	0.964254758	-7.376022158	2.89E-05	0.000537995	2.952074756	-	-
lnc-RP3-486B10.1.1-4	3.224226374	0.46049536	7.374888907	2.89E-05	0.000538443	2.917160385	-	-
lnc-FICD-2	4.322288501	0.786482053	7.365125261	2.93E-05	0.000544166	2.923484927	-	-
lnc-ANAPC11-4	3.863687455	1.214857836	7.363415524	2.93E-05	0.000544734	2.933482577	-	-
lnc-KCNC1-2	-5.48447241	1.169264595	-7.347523171	2.99E-05	0.000553131	2.886583558	-	-
lnc-SYT15-3	4.491935496	2.006820052	7.337116611	3.02E-05	0.000559188	2.859058388	-	-
lnc-ATG5-3	5.013440473	5.912102384	7.33292306	3.03E-05	0.000561601	2.873184213	-	-
XLOC_933800	3.336913618	0.94906639	7.327044018	3.06E-05	0.000564854	2.87358633	-	-
lnc-GIT2-1	4.416135707	3.761675877	7.321900807	3.07E-05	0.000567906	2.876670069	-	-
lnc-MTERF-8	3.415485377	1.013148602	7.314246183	3.10E-05	0.000572352	2.858899707	-	-
lnc-SCN2A-8	2.9152655	0.185961486	7.307703828	3.12E-05	0.000575602	2.857050055	-	-
lnc-SLC16A3-1	2.921671018	9.899944493	7.299995059	3.15E-05	0.000579897	2.834089535	-	-
lnc-CYFIP1-5	2.915324041	5.962274221	7.298465355	3.16E-05	0.000580651	2.862935281	-	-
lnc-RWDD3-1	-5.007111985	1.186985605	-7.284228896	3.21E-05	0.000588575	2.830499951	-	-
lnc-SIK2-1	5.590044199	1.622272682	7.280482082	3.22E-05	0.000590831	2.818772286	-	-
XLOC_235729	3.405265375	0.823586024	7.269404779	3.26E-05	0.00059781	2.781363266	-	-
lnc-DALRD3-2	4.336456269	7.035984075	7.268259755	3.27E-05	0.000598066	2.83249726	-	-
lnc-CYB561-5	5.024715748	1.725132567	7.247028611	3.35E-05	0.00061086	2.780900577	-	-
LINC01550	-5.767641306	1.67419084	-7.245115035	3.35E-05	0.00061193	2.803048886	-	-
XLOC_378168	7.031079217	5.21649555	7.243675822	3.36E-05	0.00061267	2.754635178	-	-
lnc-HKR1-3	2.988969006	0.148363094	7.234941803	3.39E-05	0.000618009	2.769873396	-	-
lnc-FAAH2-6	5.362985761	1.855328953	7.225239736	3.43E-05	0.000624364	2.758171493	-	-
lnc-CLASP2-1	3.591897301	7.036995943	7.183949455	3.60E-05	0.00065153	2.739091057	-	-
lnc-FSIP1-1	3.442231605	0.943231141	7.177671471	3.62E-05	0.000655966	2.703730175	-	-
lnc-MPHOSPH8-4	5.034288961	1.018487488	7.174169946	3.64E-05	0.000658044	2.704509405	-	-
lnc-SBDS-4	-4.475169246	1.41088674	-7.169172999	3.66E-05	0.000660982	2.717331646	-	-
lnc-GMDS-1	4.850669114	1.719960435	7.143253768	3.77E-05	0.000678682	2.665785348	-	-
HOXC-AS3	-5.587481903	1.427423959	-7.141369563	3.78E-05	0.000679691	2.665699049	-	-
lnc-TMSB15A-3	5.117210127	1.654974936	7.135656855	3.80E-05	0.000682942	2.651814819	-	-
lnc-ATL1-2	4.7412967	2.762393525	7.120533958	3.87E-05	0.000693748	2.623086967	-	-
lnc-ZNF397-2	6.118878582	3.347961024	7.119391991	3.88E-05	0.000694286	2.610546589	-	-
lnc-LRR1-1	7.700069738	4.9867722	7.106946245	3.93E-05	0.00070354	2.619010721	-	-
ZNF561-AS1	3.780192928	1.908562586	7.079141814	4.06E-05	0.000724431	2.569339137	-	-
lnc-DUPD1-2	5.155733956	1.66917495	7.067866927	4.11E-05	0.000733048	2.572493848	-	-
lnc-AMFR-2	3.977287138	0.533719174	7.05205347	4.19E-05	0.00074571	2.553316248	-	-
lnc-PLEKHH1-1	5.701717788	3.739088274	7.040279593	4.25E-05	0.000754408	2.530605009	-	-
XLOC_1230085	6.409922929	3.617146161	7.026789484	4.32E-05	0.000764754	2.499395906	-	-
lnc-ACP1-3	-5.564354594	1.411090444	-7.025376031	4.32E-05	0.000765693	2.520965799	-	-
lnc-RP11-210M15.2.1-6	6.139707784	4.183646094	7.022608245	4.34E-05	0.000767066	2.491273258	-	-
lnc-TRAP1-1	4.407872391	1.424515264	7.015390793	4.37E-05	0.000772388	2.516438062	-	-
lnc-CACNA2D3-2	-4.239639498	0.790279511	-7.008406293	4.41E-05	0.000777737	2.529308242	-	-
lnc-RLIM-8	5.121217354	1.137582744	7.005955566	4.42E-05	0.000779313	2.50831755	-	-
WDFY3-AS2	2.31085764	5.395315383	7.002443589	4.44E-05	0.000781864	2.543052584	-	-
lnc-CSNK1G2-4	3.619948387	6.762455349	6.998030015	4.46E-05	0.000785584	2.528819653	-	-
lnc-CHRNA5-3	-5.433943728	1.139002617	-6.997498887	4.47E-05	0.000785742	2.473858762	-	-
lnc-BARHL2-4	-4.790504118	1.035008862	-6.995533494	4.48E-05	0.000787221	2.514367294	-	-
XLOC_2835382	-4.050680928	1.412775601	-6.988915981	4.51E-05	0.000793016	2.497944305	-	-
XLOC_2712257	3.770070257	0.943461798	6.986748497	4.52E-05	0.000794699	2.448575545	-	-
lnc-MST1P9-3	-3.494509384	1.348595406	-6.976670987	4.58E-05	0.000803474	2.503342713	-	-
lnc-CHADL-1	4.695825788	6.374633283	6.976183531	4.58E-05	0.000803596	2.489292437	-	-
SNAP25-AS1	4.463428541	4.134038549	6.965674201	4.64E-05	0.000811531	2.472819164	-	-
lnc-ULBP3-5	-5.256868559	1.207773055	-6.955821931	4.69E-05	0.00082064	2.458271072	-	-
TMEM9B-AS1	-5.973358993	1.558211194	-6.933386807	4.82E-05	0.000840846	2.443021617	-	-
SPAG5-AS1	3.082395015	8.024551489	6.924821423	4.86E-05	0.000849028	2.378870968	-	-
SUCLA2-AS1	3.474969227	0.632088195	6.911107239	4.94E-05	0.000861088	2.390125318	-	-
lnc-NCEH1-1	-5.15026405	1.571832696	-6.904118616	4.98E-05	0.000867506	2.412431017	-	-
lnc-SERPINB6-1	2.903593247	7.650107656	6.902506513	4.99E-05	0.0008688	2.393184185	-	-
lnc-MBOAT1-13	6.690904433	6.25510461	6.901791687	5.00E-05	0.000869173	2.358438621	-	-
XLOC_1228939	-5.17461426	2.423974385	-6.896291176	5.03E-05	0.000873756	2.345379228	-	-
lnc-NEDD1-8	-5.388534912	1.273158253	-6.895580332	5.04E-05	0.000874128	2.39645596	-	-
RAD51-AS1	-4.492731694	1.508755654	-6.887528631	5.08E-05	0.000880718	2.405174175	-	-
XLOC_1175771	3.905309871	0.561757502	6.887483987	5.08E-05	0.000880718	2.361206048	-	-
XLOC_2396935	5.690052685	2.87462659	6.884015505	5.10E-05	0.000883977	2.357790295	-	-
lnc-EXOSC6-2	5.795141146	4.281654712	6.880182041	5.13E-05	0.000887266	2.360321631	-	-
XLOC_1232513	4.881146374	2.340847061	6.879479753	5.13E-05	0.000887638	2.350092376	-	-
lnc-GNRHR2-1	2.786328565	8.631853582	6.876910804	5.15E-05	0.000889976	2.332905559	-	-
lnc-PTPRZ1-5	3.551863268	0.371746583	6.873270184	5.17E-05	0.000892719	2.341116126	-	-
lnc-ZNF804B-2	-5.104761583	1.208607093	-6.867321867	5.21E-05	0.000897928	2.340299657	-	-
lnc-CCDC70-2	5.025666584	1.980515924	6.852383518	5.30E-05	0.000912117	2.287631064	-	-
lnc-NCKAP1-1	3.998292924	1.17859972	6.851312323	5.31E-05	0.000912904	2.33216983	-	-
XLOC_933618	3.10252034	0.891265926	6.840004616	5.38E-05	0.000924121	2.341938771	-	-
lnc-RHOC-1	2.112840246	6.983377407	6.82588243	5.47E-05	0.00093825	2.276247308	-	-
lnc-C11orf1-1	3.750774471	1.576882316	6.822263797	5.49E-05	0.000941919	2.269985879	-	-
lnc-CXorf58-2	4.531125896	1.39781997	6.819799473	5.51E-05	0.000944303	2.277359414	-	-
lnc-POTEF-4	-2.948774545	0.752321988	-6.799696762	5.64E-05	0.000963678	2.261572685	-	-
lnc-LGSN-6	2.89611607	0.4558191	6.792298637	5.69E-05	0.00097149	2.256251921	-	-
XLOC_847150	5.77907676	3.800168224	6.787896236	5.72E-05	0.000975377	2.210891174	-	-
lnc-MRPS25-5	6.315983437	7.748789214	6.78113763	5.77E-05	0.000981297	2.254879281	-	-
lnc-FAM25A-3	4.619686639	1.759876722	6.779268583	5.78E-05	0.000983095	2.204461626	-	-
lnc-AC115618.1-1	5.762812315	3.602603249	6.778056175	5.79E-05	0.000984123	2.204055159	-	-
lnc-AFM-3	4.301947806	2.423647875	6.769300398	5.85E-05	0.000993425	2.191476412	-	-
lnc-MFSD8-1	4.288814616	1.040078937	6.765550168	5.88E-05	0.000997359	2.225456734	-	-
lnc-TMEM150A-3	3.659479432	9.918908066	6.764556033	5.89E-05	0.000998143	2.206796113	-	-
lnc-NSMCE1-1	5.408254094	3.727150998	6.760838524	5.91E-05	0.001002196	2.182834647	-	-
lnc-KLHL22-2	3.094105737	5.100232028	6.756920978	5.94E-05	0.001006509	2.244132896	-	-
lnc-TMEM234-1	3.296214283	3.227222788	6.742728675	6.04E-05	0.001022566	2.18594057	-	-
XLOC_2219986	5.241539748	1.135774716	6.734779639	6.10E-05	0.001030985	2.185353956	-	-
lnc-RP11-930P14.1.1-1	4.046507463	1.435678226	6.712889127	6.26E-05	0.001057812	2.147955863	-	-
lnc-ILK-1	3.75960636	1.504032805	6.710636828	6.28E-05	0.001059832	2.131044005	-	-
lnc-PRDM13-2	4.65178472	1.992427	6.708536001	6.30E-05	0.001061761	2.130113669	-	-
lnc-SDF2-1	3.411691435	1.021244665	6.708459407	6.30E-05	0.001061761	2.15053953	-	-
lnc-SH2D3A-2	5.20375156	1.496723277	6.705032362	6.32E-05	0.001065729	2.11478864	-	-
lnc-DHX15-1	-5.09886882	1.62620443	-6.690745834	6.43E-05	0.001082957	2.154680747	-	-
lnc-FPR2-1	-4.178341678	0.65224458	-6.668525164	6.61E-05	0.001107993	2.068779278	-	-
lnc-TASP1-10	3.138777791	0.386325807	6.664135525	6.64E-05	0.001113452	2.097267233	-	-
lnc-CCDC7-2	6.133435787	5.802983968	6.647349998	6.78E-05	0.001134068	2.04021556	-	-
lnc-HELZ-2	5.957476786	4.507788939	6.646296269	6.79E-05	0.001134611	2.049219708	-	-
lnc-KRT80-9	5.570353954	4.807208896	6.626794354	6.95E-05	0.001159954	2.015523161	-	-
lnc-AC011239.1.1-6	-4.028527326	0.715404468	-6.617576221	7.03E-05	0.001172099	2.051584465	-	-
lnc-FBXO2-1	-3.388233851	0.69762308	-6.6076064	7.11E-05	0.001183967	2.063898602	-	-
lnc-PPIAL4G-8	-4.745236761	1.528146773	-6.606605914	7.12E-05	0.001184555	2.068826012	-	-
lnc-IL23A-2	6.611143803	6.196859189	6.603394671	7.15E-05	0.001188726	2.006093532	-	-
lnc-TSN-4	4.452514355	0.809173956	6.600276159	7.18E-05	0.001191359	2.012154972	-	-
lnc-LECT1-1	5.057007189	7.223182479	6.593485912	7.24E-05	0.001199838	2.037058676	-	-
lnc-SSBP4-2	5.997083266	4.903843491	6.588223656	7.29E-05	0.001206611	1.966160927	-	-
lnc-PPP1R3G-3	-5.266992447	2.343022774	-6.576954992	7.39E-05	0.001221397	1.990064452	-	-
lnc-GCGR-1	3.163373194	8.323753874	6.574177541	7.41E-05	0.001225066	1.967059504	-	-
lnc-MTMR2-1	-3.548936024	1.350849143	-6.564985366	7.49E-05	0.001237448	1.957315204	-	-
lnc-C19orf44-5	4.320081591	1.43734898	6.556530207	7.57E-05	0.00124835	1.956072851	-	-
XLOC_1547746	-2.562303771	0.158110136	-6.550557039	7.63E-05	0.001256527	1.926163389	-	-
lnc-PRMT8-6	3.097855422	0.262288868	6.547981358	7.65E-05	0.001260003	1.961208524	-	-
lnc-YY1-1	5.636409561	5.683645721	6.545543286	7.68E-05	0.001263277	1.923320951	-	-
lnc-MRC2-1	4.391658823	2.679034461	6.544973815	7.68E-05	0.001263662	1.908058069	-	-
lnc-ATP1A3-1	-3.499856544	1.237090166	-6.543076742	7.70E-05	0.001266107	1.959181215	-	-
lnc-DDX51-2	5.34733472	1.733174544	6.542101631	7.71E-05	0.001267124	1.936035838	-	-
LINC00526	6.498531381	6.295117353	6.522597572	7.89E-05	0.0012963	1.906406796	-	-
lnc-TSKS-1	5.340011326	3.532246393	6.512722018	7.99E-05	0.001311106	1.883624284	-	-
lnc-SUSD5-1	5.368817814	1.517852082	6.505438256	8.06E-05	0.001321355	1.914777507	-	-
lnc-MCTS1-2	6.395094265	3.680291758	6.502877621	8.09E-05	0.001325008	1.858256579	-	-
lnc-TP53I11-6	4.6750971	0.854136218	6.493269512	8.18E-05	0.001339735	1.896156639	-	-
lnc-TMEM132B-9	-4.776871994	1.054798922	-6.490283842	8.22E-05	0.001343623	1.903471469	-	-
lnc-RGS18-6	5.448928299	3.705207223	6.4883093	8.24E-05	0.001346372	1.841340163	-	-
lnc-KRBA1-2	4.379528192	2.180791084	6.486236575	8.26E-05	0.00134929	1.833491511	-	-
lnc-TMUB2-2	2.956120206	8.942793856	6.483362756	8.29E-05	0.001351969	1.842982404	-	-
lnc-CAB39L-4	3.891269748	2.121060522	6.478469243	8.34E-05	0.001359098	1.835410113	-	-
lnc-LOH12CR1-5	3.658156783	0.405043362	6.469072287	8.43E-05	0.001372475	1.845285662	-	-
lnc-AGPS-3	5.014618455	5.985596517	6.461139069	8.52E-05	0.001385271	1.866959459	-	-
lnc-USP8-1	5.005580962	0.932061921	6.455302435	8.58E-05	0.001393682	1.825984163	-	-
lnc-USPL1-2	-5.945727719	1.650210865	-6.424471642	8.91E-05	0.001442917	1.768988412	-	-
lnc-L3MBTL2-1	4.630073857	2.340647971	6.422568847	8.93E-05	0.001445769	1.766811458	-	-
lnc-ATP6V1E2-5	4.188436249	1.253506484	6.415105178	9.02E-05	0.001458105	1.7834898	-	-
lnc-SRGAP3-2	4.900271248	6.668799328	6.400306212	9.18E-05	0.001482889	1.810454654	-	-
ZMYM4-AS1	7.296998393	4.354015535	6.379641053	9.42E-05	0.001518624	1.710159362	-	-
lnc-AC114947.1.1-1	7.086611457	6.446163658	6.377244486	9.45E-05	0.001520826	1.741145898	-	-
lnc-TMPRSS2-1	5.390785174	3.904906445	6.369710873	9.54E-05	0.00153283	1.686815268	-	-
lnc-CCM2-2	6.631590131	4.819920278	6.369084889	9.55E-05	0.001533439	1.686918299	-	-
lnc-KIAA0125-2	-5.52836895	1.378942351	-6.366503997	9.58E-05	0.001537797	1.714216885	-	-
lnc-TMEM126B-4	-4.376740426	2.080251303	-6.364403234	9.60E-05	0.001541245	1.733434953	-	-
lnc-XPOT-4	-5.284195256	1.118284729	-6.35822934	9.68E-05	0.001551435	1.683795203	-	-
lnc-RP11-6F2.7.1-5	2.435524988	3.682198116	6.344816083	9.84E-05	0.001572212	1.676706502	-	-
lnc-AC087289.1-1	3.848479712	0.699235724	6.343088978	9.86E-05	0.001574411	1.700410335	-	-
lnc-DUSP14-4	6.477493616	5.366895769	6.336747749	9.94E-05	0.00158575	1.651076808	-	-
DANT1	-4.429635858	0.878472333	-6.333809739	9.98E-05	0.00159099	1.645183857	-	-
lnc-CDR2-1	3.682652031	6.835614591	6.330978702	0.000100141	0.001596035	1.713273678	-	-
XLOC_2217124	-4.773947751	1.040579153	-6.32329595	0.00010111	0.001609627	1.68326419	-	-
XLOC_1174819	-7.528709028	6.774721473	-6.317288943	0.000101875	0.001617727	1.64949107	-	-
XLOC_1174715	5.566496319	3.889070192	6.316279951	0.000102004	0.001618943	1.658460221	-	-
lnc-BTG2-3	6.39013824	6.665847802	6.3090056	0.00010294	0.001632558	1.614877935	-	-
lnc-GPR101-3	-4.730502083	1.031815892	-6.298629291	0.000104291	0.001652732	1.632756715	-	-
lnc-TOR1AIP1-1	3.942544884	4.445742099	6.293465154	0.000104971	0.001662242	1.661414309	-	-
lnc-ZNF177-1	2.463914678	7.192400942	6.286911258	0.00010584	0.00167474	1.588693452	-	-
lnc-SALL1-6	-4.290070049	1.41981681	-6.269649118	0.000108167	0.001708333	1.640297622	-	-
lnc-UBL5-7	4.441594171	1.502529081	6.268456903	0.00010833	0.001710258	1.630375672	-	-
lnc-TBPL1-3	5.688868135	2.091761801	6.26728474	0.00010849	0.001711044	1.588992337	-	-
lnc-CTU2-2	3.619163349	1.110342582	6.267195274	0.000108503	0.001711044	1.589482518	-	-
lnc-SMARCC2-3	6.441869435	4.157517758	6.263320963	0.000109034	0.00171878	1.571932987	-	-
lnc-C6orf201-11	-5.340448559	1.304184325	-6.259967396	0.000109497	0.00172542	1.613476619	-	-
lnc-APEX1-2	-4.612351967	0.974909931	-6.257837652	0.000109792	0.001728112	1.610460287	-	-
lnc-GNG13-5	-5.606525376	1.401640487	-6.256499855	0.000109977	0.001730383	1.575161577	-	-
XLOC_514590	4.699415609	0.89732216	6.246771273	0.000111337	0.001749808	1.563345548	-	-
lnc-TRMT61B-1	2.161040846	0.138202445	6.245197064	0.000111559	0.001751977	1.572886268	-	-
lnc-PFKP-16	-5.40275349	1.312937808	-6.238442393	0.000112516	0.001765682	1.552800643	-	-
lnc-ZNF804B-1	-5.368738203	1.319303098	-6.237240951	0.000112687	0.001767091	1.547696163	-	-
XLOC_2393336	7.403361471	4.785960658	6.232454726	0.000113372	0.001775538	1.515752048	-	-
DIO3OS	-4.248915112	0.782048054	-6.231665667	0.000113485	0.001775761	1.531332343	-	-
lnc-MRPL40-4	6.280294086	4.993842728	6.230194621	0.000113697	0.001778206	1.521079203	-	-
lnc-JUNB-2	6.000633627	8.236103789	6.22777253	0.000114046	0.001782625	1.54050824	-	-
lnc-MAFF-2	5.298416117	3.799895878	6.227502609	0.000114085	0.001782625	1.506797721	-	-
lnc-NKX3-1-2	4.386920275	0.797643501	6.196501096	0.000118662	0.001846872	1.505911577	-	-
lnc-NSA2-3	5.370059467	1.945715612	6.194788552	0.00011892	0.001850207	1.495540807	-	-
lnc-BPHL-9	3.225344628	6.495116072	6.192136581	0.000119322	0.001854384	1.552239405	-	-
lnc-ALPK1-2	5.283533728	5.643993298	6.18129224	0.000120979	0.001877349	1.474727603	-	-
lnc-BTD-1	5.711978864	3.977097315	6.17441738	0.000122042	0.001892447	1.437855712	-	-
lnc-HRASLS-2	-3.918251574	0.801837326	-6.17328779	0.000122218	0.00189447	1.511043521	-	-
XLOC_2837223	-3.346945017	1.322936678	-6.168244729	0.000123006	0.001905974	1.492522721	-	-
lnc-RSPH1-3	-5.508626813	1.364369692	-6.159783306	0.00012434	0.001923573	1.448388273	-	-
lnc-TCF7-4	3.647866506	1.635411053	6.159583904	0.000124371	0.001923573	1.437076494	-	-
lnc-UBFD1-1	2.754954922	7.710379872	6.156211187	0.000124908	0.001931153	1.507535072	-	-
lnc-CTRL-2	2.718724939	6.344314918	6.153816145	0.00012529	0.001936348	1.536486136	-	-
XLOC_006446	4.112228998	2.163962285	6.149350879	0.000126006	0.001945659	1.406651438	-	-
XLOC_1548111	4.465152968	1.482045628	6.145132369	0.000126687	0.001955047	1.441006012	-	-
lnc-LAMA5-4	3.57902836	7.31563673	6.141281473	0.000127312	0.001963965	1.463047522	-	-
lnc-GDI2-1	6.46272647	4.054479706	6.138635716	0.000127743	0.00196989	1.396448736	-	-
lnc-CDIPT-1	3.423194592	12.229511	6.133387324	0.000128603	0.001980962	1.396405011	-	-
lnc-ALDH1A2-3	2.030283296	7.314625951	6.130664263	0.000129052	0.001987142	1.397531425	-	-
LINC01270	-4.254124347	0.840873838	-6.124135122	0.000130135	0.002002341	1.438477653	-	-
lnc-WDR34-2	6.046087183	4.554735502	6.108448369	0.000132777	0.002033265	1.34675303	-	-
FARSA-AS1	2.916211832	7.040584528	6.10452312	0.000133447	0.002042031	1.482502575	-	-
lnc-SPINT2-5	-4.302348871	1.923859325	-6.100488964	0.000134139	0.002050377	1.418783006	-	-
lnc-C10orf103-1	3.007512087	9.077146769	6.096709408	0.000134791	0.002059595	1.35883607	-	-
lnc-KLHL25-12	4.666915649	2.859449483	6.090054781	0.000135948	0.002074997	1.322126609	-	-
lnc-C6orf105-5	5.313855129	4.070169968	6.087919265	0.000136322	0.002078275	1.333596271	-	-
lnc-AC084851.1-9	3.945781668	3.112886181	6.087690773	0.000136362	0.002078275	1.326695388	-	-
lnc-SCNN1B-1	2.512641243	6.397371647	6.072903429	0.00013898	0.002114681	1.445268637	-	-
lnc-ARVCF-4	3.368519127	6.621198308	6.070283083	0.000139449	0.002120692	1.418400801	-	-
lnc-BMP8A-2	3.125599532	1.010445329	6.057713296	0.000141725	0.002151397	1.32799243	-	-
lnc-MYC-3	-5.006136141	0.982954268	-6.051526411	0.00014286	0.002167841	1.2975701	-	-
lnc-LRRC61-5	3.90653652	5.837759901	6.050428689	0.000143063	0.002170125	1.404032466	-	-
XLOC_2559576	3.380946427	0.310299359	6.040535632	0.000144901	0.002192443	1.292564643	-	-
lnc-DOC2B-3	-3.410261627	0.660229847	-6.031103242	0.000146678	0.002216115	1.284164148	-	-
lnc-TLE3-8	2.320243097	12.26473069	6.029780112	0.000146929	0.002219107	1.276684799	-	-
lnc-PPFIA3-2	3.867111525	0.686818358	6.028353422	0.0001472	0.00222187	1.281084616	-	-
XLOC_1016089	5.668930995	4.677813184	6.026788733	0.000147498	0.002223691	1.242776346	-	-
lnc-GDPD4-2	3.427225816	1.076435506	6.02220735	0.000148375	0.002234989	1.270324597	-	-
lnc-SOD3-1	-4.235899689	1.554360275	-6.017675016	0.000149247	0.00224517	1.34482548	-	-
lnc-C19orf71-3	4.152191123	0.7225945	6.014053655	0.000149949	0.002253326	1.286115887	-	-
lnc-ETNK1-3	-4.991292795	1.281514273	-6.013020137	0.00015015	0.002255533	1.244718652	-	-
XLOC_2559125	4.753575803	1.021983779	6.007386363	0.000151249	0.002270421	1.260296506	-	-
lnc-NME4-1	4.439168268	0.753891993	5.998569679	0.000152988	0.002295694	1.259388562	-	-
lnc-S1PR1-2	-4.934395091	1.644613794	-5.980808985	0.000156556	0.002338326	1.250833526	-	-
lnc-PFKFB2-2	3.982549636	8.874801144	5.971200293	0.000158523	0.002364337	1.196722935	-	-
XLOC_2032021	5.000714989	2.913043056	5.965515499	0.0001597	0.002380189	1.169116171	-	-
lnc-TIGD6-1	5.926227082	4.615647902	5.958824942	0.000161097	0.002395886	1.157803833	-	-
lnc-BTBD6-1	5.870506666	6.925868819	5.953240156	0.000162273	0.002412273	1.196909723	-	-
lnc-AL901608.1-17	-4.765426154	1.112078066	-5.953046263	0.000162314	0.002412273	1.146351837	-	-
XLOC_2835377	-4.677618645	2.46199416	-5.93903539	0.000165307	0.002452389	1.150609818	-	-
LINC00390	-4.630993498	1.06133131	-5.923894104	0.000168608	0.002496048	1.178667942	-	-
lnc-RIC8A-2	3.254759041	0.29732285	5.920510479	0.000169355	0.002504453	1.13295123	-	-
lnc-ENTPD5-5	2.989160967	6.300618906	5.918442866	0.000169813	0.002508571	1.203293169	-	-
lnc-USP28-5	4.324127784	0.795853635	5.917764206	0.000169964	0.002509912	1.156309378	-	-
lnc-SLC23A1-1	4.326607484	8.396130435	5.912399958	0.000171161	0.00252491	1.115169115	-	-
lnc-RP11-404P21.6.1-9	3.119979707	6.930086303	5.91027617	0.000171637	0.002531044	1.220992936	-	-
lnc-ABCC4-1	3.708702696	1.039816536	5.909580505	0.000171794	0.002532457	1.119937548	-	-
lnc-C19orf10-1	3.400989463	0.352450624	5.905822908	0.000172641	0.002543152	1.113091361	-	-
lnc-BMS1-12	-6.902935825	5.987921889	-5.900806794	0.000173779	0.002556929	1.079497598	-	-
lnc-SCNN1G-1	4.182329033	0.660485089	5.898249585	0.000174362	0.002563088	1.112571979	-	-
lnc-MINA-9	4.705144342	1.445323871	5.896275398	0.000174813	0.002568824	1.101168664	-	-
lnc-KCTD18-1	4.298371651	6.816892108	5.892130901	0.000175766	0.002581005	1.067032685	-	-
lnc-FAM127C-1	2.110690497	8.901404456	5.853224131	0.000184984	0.002705914	1.041166394	-	-
lnc-PYCARD-1	5.706658264	5.547865391	5.849324679	0.000185936	0.002717942	1.06880884	-	-
lnc-SRPK2-5	6.264351772	1.702375367	5.848199917	0.000186212	0.00272007	1.034358067	-	-
XLOC_1175053	3.384188104	0.319318083	5.847816934	0.000186306	0.002720492	1.035418972	-	-
XLOC_376248	-2.677983129	0.469290306	-5.843134857	0.000187458	0.00273637	1.021187387	-	-
LIPE-AS1	4.197669523	2.186505943	5.842177339	0.000187695	0.00273887	1.007403851	-	-
lnc-SPTBN4-3	3.702545922	0.577128859	5.840351614	0.000188147	0.002744511	1.0276529	-	-
lnc-ADAMTS18-3	4.818512666	3.662213016	5.837425287	0.000188875	0.002753199	0.986134629	-	-
lnc-ABHD4-1	3.287244832	0.310939646	5.830856227	0.000190518	0.002776191	1.012382947	-	-
lnc-PPP2R5B-4	4.259301662	3.073284787	5.824900443	0.000192022	0.002796153	0.982517271	-	-
XLOC_2393438	2.027946159	0.14889612	5.824297675	0.000192175	0.002797405	1.063390159	-	-
lnc-XRN2-10	-4.149801538	1.23159742	-5.821380565	0.000192917	0.002803323	1.047799083	-	-
lnc-MARCH10-4	-5.141946673	1.512930592	-5.814455131	0.00019469	0.002824186	1.038414003	-	-
lnc-SEMA5A-10	5.019799412	1.715879138	5.811702797	0.0001954	0.002832515	0.990260723	-	-
lnc-ZNF862-1	-3.708903543	1.086665013	-5.810123204	0.000195808	0.002837453	1.036581383	-	-
PCF11-AS1	4.459566444	4.297200964	5.808138431	0.000196323	0.002843925	0.95473955	-	-
lnc-CIB3-1	4.573711567	8.275784985	5.807756579	0.000196422	0.002844377	1.016507322	-	-
lnc-NXPH2-3	-4.709406153	1.095996374	-5.80246589	0.000197802	0.002862374	0.96759273	-	-
lnc-GATM-5	2.967513734	0.736868068	5.795264434	0.000199696	0.002888794	1.007776956	-	-
lnc-SOX15-1	4.520308809	1.017894012	5.785409973	0.000202321	0.002922717	0.94777383	-	-
lnc-MRPS27-10	4.571960999	2.607585643	5.784528622	0.000202558	0.002924114	0.934258222	-	-
lnc-YIF1A-1	3.502196311	8.499528944	5.768978184	0.00020678	0.002978907	0.943864696	-	-
XLOC_2713162	4.996745316	0.943140359	5.767711012	0.000207129	0.002982896	0.946957916	-	-
lnc-TRPV2-5	4.386777227	0.722786702	5.767243178	0.000207257	0.002983723	0.925003544	-	-
lnc-WDPCP-2	5.336315394	2.972795691	5.755022696	0.000210651	0.003026982	0.872312297	-	-
lnc-ZFP62-1	6.261530681	5.321097457	5.753326792	0.000211127	0.00303212	0.873961783	-	-
lnc-MLX-3	6.631708846	6.195742561	5.743507643	0.000213904	0.003067787	0.860911884	-	-
lnc-CD80-2	4.644113276	3.055758051	5.737387154	0.000215654	0.003087602	0.869855491	-	-
lnc-PDCD4-1	4.235418676	0.759756884	5.73657704	0.000215887	0.003089879	0.887777272	-	-
lnc-MRPL9-2	5.618843796	1.479674487	5.734507574	0.000216484	0.003094176	0.881552627	-	-
lnc-ZXDA-1	5.89843393	5.474214983	5.722867832	0.00021987	0.003139358	0.829550918	-	-
lnc-ITPR2-2	6.132918712	2.004578848	5.719984936	0.000220717	0.003149308	0.85434554	-	-
lnc-PPIC-6	3.894171699	1.608610284	5.718929805	0.000221028	0.003151655	0.862648894	-	-
lnc-NNT-5	5.591612273	5.097204027	5.711128378	0.000223343	0.003172701	0.821424636	-	-
lnc-C6orf99-7	6.122717807	6.370604576	5.705229643	0.000225111	0.003194554	0.810973304	-	-
lnc-LYRM2-1	3.621433936	1.016141253	5.702930177	0.000225804	0.003202364	0.845108859	-	-
XLOC_2836993	-4.100510289	4.494213228	-5.702895546	0.000225814	0.003202364	0.836324806	-	-
lnc-FSCN2-3	4.140490161	6.122102704	5.698039658	0.000227285	0.003218863	0.881813009	-	-
lnc-PIGG-2	6.817111376	5.241233367	5.697303361	0.000227509	0.00322023	0.79336927	-	-
lnc-RP11-796G6.2.1-3	5.298859372	3.117932218	5.689318103	0.000229954	0.00325005	0.856695597	-	-
lnc-SRA1-3	4.699093047	3.684291083	5.687060741	0.00023065	0.003258788	0.784951503	-	-
lnc-LYZL1-10	4.589146967	1.49472574	5.684354276	0.000231488	0.003268414	0.813654951	-	-
XLOC_1230773	3.552767283	1.057586258	5.684002153	0.000231597	0.003268853	0.828865141	-	-
lnc-GMDS-6	-5.263077276	2.137543363	-5.682383498	0.0002321	0.003274844	0.879837353	-	-
LINC00620	-5.240570241	1.270274066	-5.679454605	0.000233012	0.003286614	0.774748124	-	-
lnc-RP11-404L6.2.1-4	-4.788621147	1.488395047	-5.667088501	0.000236909	0.003334827	0.832332652	-	-
lnc-SLFN12-1	-5.383412613	1.328091466	-5.664297297	0.000237798	0.00334172	0.75935533	-	-
lnc-CIB1-3	3.130138027	8.663317656	5.650473131	0.000242256	0.003397508	0.798638415	-	-
EIF1B-AS1	4.203114481	6.749056798	5.645431145	0.000243903	0.003418327	0.805986566	-	-
lnc-MEP1B-2	2.215970302	6.418066838	5.636459271	0.000246866	0.003455214	0.723742779	-	-
lnc-KHDRBS3-6	-3.868358963	1.002571079	-5.634836702	0.000247406	0.003460454	0.781441069	-	-
XLOC_1232166	3.321669432	0.758967848	5.632994067	0.00024802	0.003467308	0.756512003	-	-
lnc-HLA-DMA-1	3.584504632	0.742641873	5.630753032	0.00024877	0.003474529	0.793430756	-	-
lnc-OR4F16-3	-4.409749463	1.244786356	-5.630582141	0.000248827	0.003474529	0.78815306	-	-
XLOC_2393128	4.575362227	1.006371585	5.629180407	0.000249298	0.003479934	0.72961848	-	-
lnc-CLRN2-1	5.016524022	4.379458898	5.626376276	0.000250242	0.003490777	0.7212609	-	-
XLOC_1624910	5.371933697	3.340439126	5.620407972	0.000252263	0.00351663	0.69008694	-	-
lnc-TNP1-6	-4.54177285	2.117410412	-5.617073973	0.0002534	0.003530125	0.731084947	-	-
lnc-PRR15L-6	5.070842503	4.446547124	5.613442136	0.000254645	0.003545103	0.682767077	-	-
ZBTB20-AS1	5.861895842	5.551883713	5.611438948	0.000255334	0.003553517	0.681302814	-	-
lnc-KIF26B-4	-3.337283282	0.728533201	-5.607933275	0.000256545	0.003567744	0.695327239	-	-
lnc-EVI5L-3	3.535505325	1.193991838	5.607740023	0.000256612	0.003567744	0.713627171	-	-
lnc-TAF13-2	5.542833614	5.863047373	5.593746858	0.00026151	0.00362333	0.683377046	-	-
LINC00847	3.976174822	7.46543361	5.586435123	0.000264109	0.00365618	0.716102317	-	-
lnc-TTC23-5	-4.904112532	1.128222438	-5.586053914	0.000264246	0.003656856	0.654522222	-	-
lnc-PANK3-13	4.926835953	2.185851398	5.567032016	0.000271143	0.00373993	0.631785647	-	-
lnc-XRCC6-1	4.621752576	7.724519066	5.564094338	0.000272225	0.003753621	0.670163957	-	-
lnc-SCRN1-2	-3.767513393	0.745895657	-5.561324096	0.00027325	0.00376527	0.634949212	-	-
lnc-GPR126-1	5.759352437	4.4327695	5.56003993	0.000273727	0.003770594	0.606807532	-	-
TCEB3-AS1	6.91637096	6.814913034	5.559408734	0.000273961	0.00377134	0.620748712	-	-
lnc-SLCO2B1-3	6.027991777	5.938580157	5.553639077	0.000276115	0.003798491	0.613801657	-	-
lnc-CTD-2215E18.1.1-7	4.318634926	1.453685316	5.55320044	0.00027628	0.003799504	0.673590472	-	-
lnc-PAPLN-1	6.85934435	6.40868552	5.546868641	0.000278666	0.003827288	0.585817778	-	-
lnc-BRCA1-3	4.21071311	2.180807195	5.544017052	0.000279748	0.003837107	0.588444707	-	-
LINC00649	2.681279208	7.115299088	5.541319169	0.000280776	0.003849942	0.584687297	-	-
XLOC_1623520	5.690603423	4.569979728	5.531656909	0.00028449	0.003893214	0.577132915	-	-
lnc-C19orf6-5	6.966177078	4.597666274	5.53102775	0.000284734	0.003894001	0.562783421	-	-
lnc-TCHP-1	6.728898707	4.990093269	5.515120712	0.00029097	0.003967613	0.540110851	-	-
lnc-ECHDC2-1	4.562885042	1.337638695	5.508415842	0.000293643	0.004000142	0.569141088	-	-
lnc-BDH1-5	-5.081243201	1.29733244	-5.506357384	0.000294469	0.004010085	0.56287985	-	-
lnc-TMEM161B-4	5.38650777	4.553008456	5.502198432	0.000296145	0.004027664	0.548559608	-	-
XLOC_1014170	-6.469834583	3.82454534	-5.49850636	0.000297641	0.004045386	0.517788134	-	-
TMEM246-AS1	3.857625782	1.24276555	5.497858909	0.000297904	0.004047648	0.555717847	-	-
lnc-CLMP-8	-3.746711068	1.066740085	-5.49665909	0.000298393	0.004051653	0.545536543	-	-
lnc-PSMG4-11	-5.450126838	1.215898383	-5.493615971	0.000299636	0.00406721	0.522385445	-	-
SIAH2-AS1	5.59033048	5.799183461	5.48394303	0.000303624	0.004118668	0.527100113	-	-
lnc-PXDC1-12	5.265314265	3.923889135	5.481554136	0.000304618	0.004129469	0.494370942	-	-
lnc-LEKR1-1	-4.121799088	1.518234434	-5.479825485	0.000305339	0.004136335	0.534061067	-	-
lnc-TRIM69-1	5.113481376	6.969472653	5.479629108	0.000305421	0.004136335	0.498789302	-	-
lnc-ANKRD20A2-14	4.4972205	4.13628636	5.476944231	0.000306545	0.004150216	0.545607828	-	-
lnc-RGS20-3	-4.799427076	0.96622987	-5.465745771	0.000311282	0.00420346	0.48287125	-	-
lnc-OLR1-3	5.657015685	7.986467164	5.464413484	0.000311851	0.004209781	0.478681891	-	-
lnc-BMS1-10	-5.081356683	1.497290012	-5.458444135	0.000314413	0.004239851	0.54215156	-	-
lnc-FGF21-2	3.661037353	7.085566948	5.458279707	0.000314484	0.004239851	0.576763164	-	-
KDM4A-AS1	4.494739573	5.706685077	5.454303826	0.000316203	0.004258914	0.519715187	-	-
lnc-AC006455.1-12	-6.745658152	9.587777169	-5.451215148	0.000317546	0.004274246	0.462499058	-	-
lnc-FLII-1	5.225189879	7.691808176	5.45058265	0.000317821	0.004276581	0.466711199	-	-
lnc-WNT9A-3	3.748704992	0.889159974	5.448921411	0.000318547	0.004284963	0.484803131	-	-
lnc-RPF1-1	5.895742644	4.000488704	5.44558322	0.00032001	0.004301876	0.446289295	-	-
LINC00431	-4.569312799	1.001730586	-5.439597564	0.000322651	0.004334599	0.44668305	-	-
lnc-LAMA5-2	4.350315439	6.701338145	5.435694736	0.000324386	0.004352314	0.52252846	-	-
lnc-MMP23B-1	2.790481311	4.803750631	5.434388545	0.000324969	0.004358736	0.53644189	-	-
ZNF571-AS1	5.141175685	3.615740356	5.426347279	0.000328583	0.004400144	0.414920555	-	-
lnc-MDH2-2	2.670827757	5.955277479	5.417705437	0.000332514	0.004447094	0.543411359	-	-
lnc-TNFRSF1A-3	4.049409375	2.88570096	5.412618166	0.000334852	0.00447693	0.40167557	-	-
lnc-ERICH1-9	-4.330063506	3.017303224	-5.405922334	0.000337956	0.004514102	0.389747843	-	-
lnc-AIDA-2	6.300612665	4.597473102	5.40207775	0.000339752	0.004536645	0.38504728	-	-
lnc-CCNYL2-9	-5.902054874	3.391190335	-5.390012976	0.000345456	0.004606923	0.367658348	-	-
lnc-AC010872.2.1-2	-4.996920941	1.164311216	-5.381487673	0.000349548	0.004652597	0.368267471	-	-
lnc-ZAP70-1	4.375246173	0.80343082	5.378328056	0.000351078	0.004669988	0.383580288	-	-
lnc-TMSB15A-6	4.204123378	2.456000072	5.373135777	0.000353608	0.004696171	0.343766792	-	-
lnc-SAP30-2	-3.929259169	1.379931402	-5.365731894	0.000357249	0.004739053	0.408614294	-	-
lnc-ZFP42-2	-5.028162744	1.179546472	-5.36392953	0.000358142	0.004747337	0.339519079	-	-
GMDS-AS1	-4.396276789	2.161721998	-5.356322073	0.000361935	0.004788516	0.406880452	-	-
lnc-ZNF680-14	3.95808601	1.175515726	5.353649645	0.000363278	0.004804762	0.351653437	-	-
lnc-ZNF552-2	2.49990036	6.241968181	5.351822326	0.000364199	0.004813384	0.440909155	-	-
lnc-FRMD1-8	6.864003171	6.048246184	5.351671984	0.000364275	0.004813384	0.328853438	-	-
lnc-HOXA13-1	4.636096679	7.367604841	5.349604073	0.000365321	0.00482495	0.41866427	-	-
lnc-C19orf26-2	2.448857581	7.725697592	5.349485199	0.000365381	0.00482495	0.365457849	-	-
lnc-TWIST1-1	4.251321004	2.01307104	5.343866895	0.00036824	0.004859625	0.305166025	-	-
XLOC_237626	-5.933278494	7.146954047	-5.343613588	0.000368369	0.0048598	0.330153621	-	-
lnc-POTEM-4	5.096383533	3.379132389	5.335269258	0.00037266	0.004910216	0.291329246	-	-
lnc-MLNR-1	2.275069248	0.123728482	5.329016046	0.000375911	0.004943705	0.338338594	-	-
lnc-SERAC1-3	4.116497884	7.027733511	5.326675016	0.000377136	0.004958254	0.372781609	-	-
lnc-RHOA-1	4.335123465	5.080765035	5.316664535	0.000382422	0.005014916	0.267774314	-	-
lnc-UBAP1-5	5.10719318	7.017973969	5.308816992	0.000386622	0.005059111	0.257867589	-	-
SRRM2-AS1	5.040710247	3.331717443	5.301568884	0.000390545	0.00510565	0.24204073	-	-
lnc-C2orf84-1	3.349816923	0.81506089	5.291997786	0.000395791	0.005169381	0.239092868	-	-
lnc-MTERF-7	3.077946309	0.215058419	5.290567731	0.000396581	0.005178085	0.260985785	-	-
lnc-THRB-3	4.150082711	0.684179519	5.29004627	0.000396869	0.005178619	0.281659361	-	-
lnc-HIP1R-1	6.288890564	4.244908161	5.287521004	0.00039827	0.005193656	0.219268747	-	-
lnc-ZCCHC17-7	4.048037732	6.852717079	5.286276704	0.000398962	0.00519808	0.232658243	-	-
lnc-FMO5-1	4.986382317	4.454547728	5.28624077	0.000398982	0.00519808	0.228841685	-	-
lnc-CLLU1.1-1	-4.390409363	0.967906581	-5.283178236	0.000400691	0.005218721	0.224270821	-	-
lnc-SPG11-3	5.830060831	6.58708641	5.282757588	0.000400927	0.005220161	0.273193218	-	-
lnc-SESN3-3	3.406609438	7.685640136	5.281525957	0.000401617	0.005225891	0.283946234	-	-
lnc-ARL6IP5-1	2.990059667	7.419047845	5.279091197	0.000402984	0.005240427	0.284686428	-	-
lnc-MTO1-1	3.664410156	2.684633211	5.277794162	0.000403715	0.005248297	0.209781052	-	-
lnc-IFT46-1	5.342426041	4.746652182	5.274464441	0.000405597	0.00526803	0.198255769	-	-
XLOC_1231041	-3.553020609	1.199392612	-5.273152686	0.000406342	0.00527588	0.206743081	-	-
lnc-TIGD1-1	3.589821084	6.991047718	5.268273622	0.000409122	0.005308686	0.312643444	-	-
lnc-CDH18-7	-5.579178222	1.496715991	-5.263949616	0.000411603	0.005336165	0.189171165	-	-
lnc-ATPIF1-2	3.86586952	7.302637833	5.249104563	0.000420246	0.005426804	0.28789756	-	-
lnc-RNF213-1	3.990156678	0.687448165	5.248790169	0.000420431	0.005426804	0.203016407	-	-
lnc-SBF2-1	-4.125781514	0.856097889	-5.241288442	0.000424874	0.005479084	0.228336408	-	-
lnc-SNN-5	5.866591277	8.236697082	5.240499054	0.000425345	0.00548346	0.183772909	-	-
lnc-SLC7A7-2	2.632454456	7.663625612	5.238964265	0.000426261	0.005491887	0.233665852	-	-
lnc-NMU-4	2.960016461	1.413062679	5.238452103	0.000426567	0.005494141	0.155937731	-	-
lnc-CXCL16-1	5.990615171	5.481550404	5.229420812	0.000432007	0.005552229	0.139831675	-	-
lnc-SURF1-1	4.246625292	3.598011428	5.227886832	0.000432938	0.005562488	0.147423894	-	-
lnc-ARID2-11	3.324261106	5.032683757	5.212469049	0.000442418	0.005673835	0.136847143	-	-
lnc-SLAMF9-2	3.464689378	1.153189234	5.206845949	0.000445931	0.005711879	0.210239823	-	-
lnc-ZNF732-4	3.787136843	1.564138223	5.202587446	0.000448611	0.005741347	0.127229685	-	-
lnc-PADI1-1	-5.010893746	2.036893483	-5.195789147	0.000452926	0.005792605	0.134813145	-	-
TRIM52-AS1	4.248540058	4.973954774	5.195528621	0.000453092	0.005792959	0.145591522	-	-
LUCAT1	-4.08463655	0.930516242	-5.193747139	0.000454231	0.005804398	0.158064171	-	-
lnc-OR6S1-1	5.553061399	6.628908845	5.193672936	0.000454278	0.005804398	0.121371825	-	-
lnc-AL901608.1-3	-4.884025896	1.446903424	-5.193260615	0.000454542	0.005804398	0.093286359	-	-
lnc-SAFB-1	2.914745091	5.531980416	5.187936123	0.000457965	0.005843584	0.206888178	-	-
XLOC_931842	-4.498556306	1.010179607	-5.1851558	0.000459764	0.005863919	0.146919338	-	-
lnc-PIGY-5	6.921659395	6.085993278	5.181714064	0.000462001	0.005888857	0.064164904	-	-
lnc-KCNJ12-5	-3.971116081	2.360604485	-5.17533789	0.000466176	0.005934839	0.101901635	-	-
lnc-C2orf40-8	4.450793823	1.867922423	5.168655745	0.000470595	0.005985628	0.045879118	-	-
XLOC_847013	6.089433663	8.14541464	5.168378475	0.000470779	0.005986152	0.091362589	-	-
lnc-AQP8-1	4.29743453	1.417752198	5.168017166	0.000471019	0.005987387	0.08463154	-	-
lnc-PPIF-1	5.755301777	6.047791933	5.165337201	0.000472806	0.006004621	0.053667974	-	-
lnc-ZNF724P-2	-4.928252915	1.128618944	-5.164183142	0.000473578	0.006012594	0.042156564	-	-
NKILA	5.718976502	6.620733924	5.149003683	0.000483853	0.006121365	0.025075782	-	-
RNF185-AS1	4.274345881	7.571612058	5.148932771	0.000483901	0.006121365	0.077333586	-	-
lnc-PCCA-2	6.802800614	5.932301247	5.145207426	0.00048646	0.006150007	0.016916134	-	-
lnc-PRSS27-2	2.999671353	0.734847544	5.144605689	0.000486874	0.006151529	0.06086958	-	-
lnc-SCLT1-4	6.421355796	2.271084141	5.142430177	0.000488376	0.006168644	0.048764692	-	-
LINC00237	-4.446047419	1.047738954	-5.129365629	0.000497502	0.00627256	-0.001202578	-	-
lnc-HPDL-1	-4.77429479	0.985879136	-5.123389326	0.000501737	0.006320221	-0.006731457	-	-
lnc-VPS36-2	4.058457819	0.73072012	5.118253115	0.000505407	0.006356885	0.011774658	-	-
lnc-PUS10-4	2.27143654	0.721648409	5.109785675	0.000511522	0.006420274	-0.003740894	-	-
XLOC_2028133	-2.167980274	0.849955132	-5.105223076	0.000514849	0.006458161	-0.038897199	-	-
lnc-HSPA12B-1	-4.890987787	2.102034145	-5.104691579	0.000515238	0.006460937	-0.01746412	-	-
lnc-SETD6-1	4.398092302	6.88207419	5.095868485	0.000521744	0.006531458	-0.010069756	-	-
lnc-CCDC23-1	7.053986655	5.781490052	5.093808533	0.000523276	0.006548149	-0.049403515	-	-
lnc-SCGB1D4-1	6.082838872	5.402950736	5.089922168	0.000526178	0.006580533	-0.064618993	-	-
lnc-SPATA9-1	6.876690486	7.128816738	5.089694223	0.000526349	0.006580701	-0.065185607	-	-
lnc-MSMP-2	4.693933867	3.446732471	5.088861198	0.000526974	0.006586541	-0.065829587	-	-
lnc-PIGN-1	5.104144794	2.231142625	5.088560233	0.0005272	0.006586622	-0.030289148	-	-
XLOC_1830759	-2.44064098	0.374414624	-5.087315791	0.000528135	0.006595138	-0.040401248	-	-
lnc-PEAK1.1-2	5.118604087	1.915407225	5.086707184	0.000528593	0.006596786	-0.033792336	-	-
LINC01297	-3.949417977	1.059335397	-5.086404919	0.00052882	0.006596786	-0.065918565	-	-
lnc-CPSF4-1	4.7012204	1.730071287	5.0809086	0.000532977	0.006637768	-0.036053043	-	-
lnc-C19orf6-3	6.637620018	5.839269157	5.077581387	0.00053551	0.006663365	-0.083068973	-	-
lnc-ARMC7-1	4.737456938	7.184225049	5.077019923	0.000535939	0.006666717	-0.078907555	-	-
lnc-NRIP2-2	4.887304394	8.997983441	5.072163885	0.000539663	0.006709046	-0.083565131	-	-
lnc-CCNE2-1	3.28038076	1.221316516	5.067486499	0.000543275	0.006749948	-0.048398922	-	-
lnc-HSD17B1-2	4.448746339	0.827141685	5.059035946	0.000549869	0.006819708	-0.053389046	-	-
XLOC_1483768	-4.252793215	0.925499218	-5.057853319	0.000550798	0.006829211	-0.038868239	-	-
XLOC_2558461	-6.680410082	4.905419368	-5.048698057	0.000558051	0.006908896	-0.130364032	-	-
lnc-EPHB6-1	3.858420697	6.753233174	5.044170865	0.000561675	0.006949651	-0.024585796	-	-
lnc-DKK3-1	4.686742324	4.028020069	5.043452027	0.000562253	0.006954742	-0.133562141	-	-
lnc-DHRS7B-3	3.470706175	7.767829365	5.043205794	0.000562451	0.006955135	0.030493647	-	-
lnc-WNT1-2	5.212244752	4.092513293	5.040815697	0.000564377	0.006974831	-0.140767032	-	-
lnc-AL049840.1-1	4.297871173	1.154270696	5.039692262	0.000565285	0.006979243	-0.102798351	-	-
lnc-YIF1B-1	5.002290643	5.648045791	5.039657073	0.000565314	0.006979243	-0.123816546	-	-
lnc-ZSCAN2-5	4.786818743	4.712191781	5.039548091	0.000565402	0.006979243	-0.140816548	-	-
PPP3CB-AS1	4.244217079	7.536617417	5.0374638	0.000567091	0.006998025	-0.055046169	-	-
lnc-ZNF131-10	4.757053137	3.639871215	5.035316254	0.000568837	0.007015429	-0.146368424	-	-
lnc-CHRNA4-4	-4.687978558	1.402894494	-5.027773981	0.000575014	0.007081171	-0.110439186	-	-
lnc-AC040934.1-3	5.159472918	6.697682282	5.020576466	0.000580976	0.007139872	-0.168142466	-	-
XLOC_932037	6.358664058	7.488848552	5.005017113	0.000594091	0.00729034	-0.182737393	-	-
lnc-NFATC3-1	5.33777106	4.151778887	4.998059287	0.000600058	0.007357088	-0.201446993	-	-
lnc-TMBIM1-3	3.143858786	7.215748966	4.996391572	0.000601498	0.007372578	-0.043423532	-	-
lnc-RADIL-1	5.061277262	6.948894111	4.995734657	0.000602066	0.00737738	-0.196735643	-	-
lnc-AMDHD1-4	7.724962568	6.138324318	4.988064181	0.000608742	0.007450457	-0.219904597	-	-
lnc-DONSON-1	5.203989636	6.600108151	4.98580695	0.000610722	0.007468131	-0.218042015	-	-
lnc-SP110-8	4.294346097	3.704704272	4.984584302	0.000611797	0.007479092	-0.205309966	-	-
lnc-THBS4-6	6.599302325	5.272205731	4.984294856	0.000612052	0.007480021	-0.225521064	-	-
lnc-FAM161B-1	5.085801767	6.593202513	4.98388612	0.000612412	0.007482235	-0.217364207	-	-
TESC-AS1	5.451978197	5.597883404	4.982057179	0.000614026	0.007499763	-0.22298924	-	-
lnc-C3orf23-2	4.713433805	6.679874265	4.979842981	0.000615986	0.00751931	-0.133422211	-	-
lnc-COL8A2-3	4.148274981	1.349370286	4.969653546	0.000625092	0.007614911	-0.19793876	-	-
lnc-PCDH1-5	-4.943832082	0.913259376	-4.966143592	0.000628262	0.007646846	-0.244490602	-	-
lnc-SLC39A10-10	6.725903317	5.634882678	4.965223568	0.000629096	0.00765254	-0.25086883	-	-
GLTSCR2-AS1	3.335615971	2.39296732	4.957735098	0.000635927	0.007728886	-0.235362038	-	-
lnc-BOD1-1	-4.833297766	1.885298541	-4.956925157	0.00063667	0.007735675	-0.17918441	-	-
XLOC_2839036	-6.214458658	6.4057583	-4.953466678	0.000639856	0.00777212	-0.239065943	-	-
lnc-NMBR-2	-5.644280653	1.433030552	-4.952132651	0.000641089	0.00778464	-0.269605394	-	-
lnc-FAM78A-3	5.656756669	6.196497029	4.951798924	0.000641398	0.00778464	-0.269988595	-	-
MCM3AP-AS1	4.733618849	7.87260239	4.951547166	0.000641631	0.00778464	-0.25619878	-	-
lnc-ZBTB37-2	6.083857347	7.439443956	4.947135423	0.000645731	0.007829843	-0.273540972	-	-
lnc-AL033381.1-4	-4.406844097	0.992693617	-4.943161733	0.000649448	0.007872633	-0.208876835	-	-
lnc-CDK12-1	-4.767175624	1.180131803	-4.941779395	0.000650747	0.007886087	-0.210079014	-	-
CCDC144NL-AS1	6.619592484	7.300021679	4.931546517	0.000660445	0.007994353	-0.299155255	-	-
lnc-CRHR1-7	4.666668894	2.652131371	4.925826409	0.000665934	0.008056126	-0.215833508	-	-
lnc-NLRP12-2	3.063312828	0.623740517	4.925284587	0.000666456	0.008060115	-0.270524193	-	-
lnc-RIC8A-1	5.617052878	7.377420152	4.923549489	0.000668132	0.008078047	-0.305288087	-	-
lnc-ZXDB-3	3.859934498	2.902808374	4.915945194	0.000675531	0.008151	-0.298859355	-	-
XLOC_2837916	-5.153394504	1.117028869	-4.913243941	0.00067818	0.008175888	-0.326374268	-	-
lnc-NME6-2	7.069974783	7.974299521	4.910508857	0.000680873	0.008205995	-0.330483752	-	-
lnc-LRRFIP2-3	2.355276686	6.016277057	4.905954262	0.000685384	0.008253226	-0.249595928	-	-
lnc-RP11-10A14.4.1-1	6.15572315	5.227049291	4.905495105	0.000685841	0.008256346	-0.34270577	-	-
lnc-ZCCHC24-7	6.026105389	5.416573015	4.902327545	0.000688999	0.008284826	-0.341938739	-	-
lnc-C10orf28-5	2.33839945	8.297989913	4.895917454	0.000695438	0.008350245	-0.334609874	-	-
lnc-LRRC3C-2	2.696972109	6.021258977	4.892592389	0.000698803	0.008383432	-0.328043613	-	-
lnc-MST1-2	4.835259338	2.900774274	4.884921993	0.000706633	0.008462798	-0.372242527	-	-
lnc-FOXA3-1	2.599805083	6.045983413	4.883515749	0.000708078	0.008477683	-0.249860523	-	-
lnc-C1orf123-1	2.562155363	6.691559624	4.883015613	0.000708593	0.008478993	-0.210735924	-	-
lnc-RTN4IP1-2	-5.587495352	2.26148591	-4.880316362	0.000711379	0.008502597	-0.281144099	-	-
lnc-ADAM22-2	7.200175762	6.026810409	4.875177854	0.000716715	0.008556588	-0.380151368	-	-
lnc-PRR15L-3	3.888961932	2.796838164	4.867758171	0.000724495	0.008637142	-0.399415785	-	-
lnc-RHBDF1-1	5.525139243	6.352436009	4.861524919	0.0007311	0.008706622	-0.391542263	-	-
lnc-MTR-1	-4.605929552	1.173269257	-4.860173212	0.000732541	0.008718158	-0.328275329	-	-
lnc-MAN2A2-2	5.851865021	6.463379967	4.859357111	0.000733413	0.008726046	-0.404283423	-	-
lnc-HMGA1-2	5.903832492	9.568585072	4.855014693	0.000738068	0.008778939	-0.374655775	-	-
lnc-CTC-203F4.1.1-3	-4.083044812	0.945872	-4.854063142	0.000739093	0.008786125	-0.409318514	-	-
lnc-RP11-279O9.4.1-1	4.734589025	5.726455763	4.850483255	0.00074296	0.00882207	-0.409556244	-	-
lnc-PRR20A-5	-5.452605618	2.566355092	-4.836778669	0.000757966	0.008984952	-0.358074434	-	-
lnc-RNF135-1	2.906060921	2.281385557	4.835325144	0.000759577	0.009001491	-0.398026414	-	-
XLOC_754515	6.218547042	5.330677451	4.827918579	0.00076784	0.009086542	-0.441695784	-	-
lnc-SLC25A31-2	5.325480429	3.815881221	4.825926229	0.000770079	0.009110462	-0.461986319	-	-
lnc-ADCK3-1	5.385860581	5.942746243	4.825175268	0.000770925	0.009114809	-0.458283823	-	-
lnc-CCT6B-4	6.318585174	4.739151417	4.825019518	0.000771101	0.009114809	-0.463350854	-	-
lnc-GDE1-2	4.7677597	5.459936733	4.824807855	0.000771339	0.009115054	-0.444422587	-	-
lnc-OST4-5	2.656606478	6.952079707	4.821518529	0.000775058	0.009153823	-0.388891638	-	-
lnc-WDR60-11	3.013170874	2.58682782	4.819812366	0.000776994	0.009174101	-0.420488894	-	-
TRAF3IP2-AS1	-4.916541913	2.979167903	-4.816204733	0.000781105	0.009215025	-0.47035985	-	-
lnc-FREM3-2	3.978344454	0.747351616	4.81552763	0.00078188	0.009221371	-0.468540116	-	-
XLOC_846032	5.038821133	1.030799778	4.813844789	0.000783807	0.009241501	-0.469000562	-	-
lnc-ITGB3BP-5	3.786537518	6.319531123	4.812077793	0.000785837	0.009257601	-0.397022589	-	-
XLOC_000127	-2.669820535	0.094517802	-4.810665218	0.000787463	0.00926893	-0.478149502	-	-
lnc-SLMO1-1	2.436264939	6.404829934	4.809991545	0.00078824	0.009275465	-0.480182156	-	-
lnc-RALB-8	4.220324942	2.233870481	4.806555842	0.000792216	0.009314382	-0.491552014	-	-
XLOC_2835380	-3.367546448	5.355256098	-4.805366196	0.000793597	0.009328003	-0.411019159	-	-
lnc-VCAN-1	-4.930073327	1.184094444	-4.803565598	0.000795693	0.009339513	-0.488889385	-	-
lnc-UCK1-3	5.231830721	7.167671625	4.800341051	0.000799461	0.009375847	-0.489938315	-	-
lnc-TYMS-1	3.35944881	7.198237592	4.798314406	0.000801839	0.009398464	-0.321275033	-	-
lnc-C7orf23-2	4.11904657	3.233891831	4.793643668	0.000807349	0.009457738	-0.446097928	-	-
lnc-CPVL-4	4.072520689	0.681229036	4.786162218	0.000816258	0.009548729	-0.461727161	-	-
lnc-ATG12-5	6.803978815	5.945643106	4.78320033	0.000819814	0.009584086	-0.518503129	-	-
lnc-HDLBP-1	4.326284282	8.115530646	4.781560531	0.000821789	0.009594223	-0.446440451	-	-
lnc-C12orf63-3	2.469330878	0.933259512	4.779850041	0.000823856	0.009610731	-0.486131878	-	-
lnc-DPP4-2	5.630478037	4.81346766	4.777809131	0.000826329	0.00963689	-0.531316656	-	-
XLOC_1621861	4.198403575	3.630449032	4.777316583	0.000826927	0.009641175	-0.519127689	-	-
lnc-ARHGAP11B-8	-4.485901399	1.311005251	-4.772678617	0.00083258	0.009701465	-0.504044534	-	-
lnc-SDCCAG8-1	6.153958578	5.002355667	4.77250399	0.000832794	0.009701465	-0.542585653	-	-
XLOC_2835378	-2.866112844	0.411395392	-4.766651833	0.000839988	0.00976623	-0.486585711	-	-
lnc-FBXL22-1	3.893678092	6.666354894	4.761966725	0.000845795	0.009828285	-0.550337358	-	-
FAM95B1	-3.100762787	0.556050568	-4.760427603	0.000847712	0.009847826	-0.556596631	-	-
ZBED5-AS1	-4.999834135	2.442284005	-4.752966766	0.000857071	0.009945499	-0.561227681	-	-
lnc-FAM110B-12	-5.149691478	1.91229612	-4.747540172	0.000863948	0.010011405	-0.48938676	-	-
lnc-EDC3-3	3.26441707	1.245779676	4.738312973	0.000875776	0.010128821	-0.563774178	-	-
lnc-FAM59B-3	5.531880111	5.449271614	4.73318861	0.000882419	0.010197193	-0.580918822	-	-
lnc-PANK1-6	2.805384121	5.8544718	4.72896676	0.000887932	0.01024675	-0.573526957	-	-
lnc-FAM135A-2	4.617844675	2.74128799	4.727825369	0.000889429	0.010261193	-0.604976016	-	-
lnc-FAM196A-1	6.601658721	6.00354165	4.722200895	0.000896845	0.010332495	-0.608222574	-	-
lnc-RRP8-1	4.281562848	7.472014226	4.71761033	0.000902946	0.010388949	-0.534475042	-	-
XLOC_004281	6.454415896	4.755629187	4.717556526	0.000903018	0.010388949	-0.623835109	-	-
lnc-NMNAT1-3	5.774925401	8.070613391	4.717082662	0.000903651	0.010390864	-0.616866697	-	-
lnc-AP3S1-6	5.229672884	6.224979714	4.716076214	0.000904995	0.010400917	-0.620390638	-	-
lnc-TRAPPC2L-1	4.381046041	4.320541231	4.711110641	0.000911661	0.010459967	-0.630350384	-	-
lnc-C15orf41-11	-2.208824722	0.433097018	-4.708640634	0.000914996	0.010495354	-0.542478934	-	-
lnc-GPR37L1-2	4.371749986	1.084245617	4.704626387	0.000920444	0.010546276	-0.599592735	-	-
lnc-IL37-4	-4.729189031	0.965068941	-4.703990625	0.00092131	0.010550417	-0.607304935	-	-
XLOC_2396781	2.937260538	6.717208904	4.697641854	0.000930006	0.01063287	-0.620991709	-	-
FLNB-AS1	6.292572608	6.805214631	4.694964466	0.0009337	0.010666996	-0.657545401	-	-
lnc-TMEM234-4	4.571151053	9.409069313	4.694571657	0.000934243	0.010666996	-0.634794315	-	-
lnc-C16orf62-1	5.927063203	6.032669557	4.693278238	0.000936034	0.010683918	-0.659919876	-	-
lnc-PRR15-4	3.901481856	1.591065696	4.686528802	0.000945439	0.010782442	-0.629189404	-	-
XLOC_1623407	3.059893388	1.522162894	4.683373252	0.000949871	0.0108278	-0.671580073	-	-
XLOC_1546890	-5.526695969	2.25787372	-4.683144509	0.000950193	0.0108278	-0.578284299	-	-
LINC01016	-2.200121	0.403703988	-4.679226659	0.000955728	0.010878259	-0.582826726	-	-
lnc-KIF26A-1	-3.068754548	0.377916558	-4.677656806	0.000957956	0.010893362	-0.675613817	-	-
lnc-JMJD7-PLA2G4B-2	5.676534144	6.582340782	4.677604353	0.00095803	0.010893362	-0.679609011	-	-
lnc-PDE4D-1	4.296673629	4.855110284	4.676771095	0.000959215	0.010903064	-0.664399969	-	-
lnc-BIRC8-3	6.738748621	8.529209766	4.671498071	0.000966748	0.010974587	-0.692944329	-	-
lnc-PARN-14	-4.076565429	0.691503216	-4.668109293	0.000971623	0.011023939	-0.655196755	-	-
lnc-ZNF814-1	3.043058251	5.239066258	4.66772359	0.000972179	0.011027261	-0.589185348	-	-
lnc-GOLPH3L-1	2.259171762	0.819882459	4.664010371	0.000977554	0.011079209	-0.659406131	-	-
XLOC_2030250	5.037127782	5.261174596	4.656696916	0.000988232	0.011187348	-0.68801853	-	-
lnc-ERH-1	3.036531455	7.981424777	4.656464951	0.000988573	0.011187348	-0.662411274	-	-
lnc-MYOM1-1	6.054813669	8.630055637	4.656378326	0.0009887	0.011187348	-0.713017818	-	-
lnc-RBM26-1	4.544489695	3.448336773	4.652446238	0.000994496	0.01124211	-0.725213416	-	-
lnc-IL6-8	7.169110886	8.509639764	4.644263853	0.001006672	0.011366102	-0.730998102	-	-
lnc-C5orf27-4	5.457472648	4.222366155	4.639344927	0.001014069	0.011443432	-0.745266723	-	-
lnc-RP11-1012A1.4.1-2	5.655329954	4.014991941	4.636526746	0.001018332	0.011485347	-0.745316699	-	-
lnc-GYG2P1-1	6.011168904	5.740882687	4.634975895	0.001020686	0.011508797	-0.740887358	-	-
lnc-CELF3-2	6.315554767	5.375541556	4.628788405	0.001030138	0.011599728	-0.759081559	-	-
lnc-FBXO47-1	5.930560119	5.299895054	4.624297059	0.001037056	0.011668211	-0.763299869	-	-
lnc-SYT13-2	4.004753656	3.384429796	4.622539002	0.001039778	0.011689399	-0.763727614	-	-
lnc-PER2-5	6.235314632	5.502682263	4.617002329	0.001048399	0.011776823	-0.774231625	-	-
XLOC_2712832	-4.074006667	0.892388159	-4.615749983	0.00105036	0.011795678	-0.735345672	-	-
XLOC_000090	6.024293322	5.259653153	4.610652919	0.00105838	0.01187299	-0.785315369	-	-
lnc-BHMT2-4	-3.338600303	0.515762064	-4.608896124	0.001061159	0.011896223	-0.782744126	-	-
lnc-FKBP8-1	4.704969261	7.584518204	4.608653565	0.001061544	0.011896223	-0.686360893	-	-
lnc-AE000662.92.1-10	-3.652874938	0.609807347	-4.607728449	0.001063011	0.011902591	-0.785558574	-	-
lnc-ZNF181-2	4.995880953	4.627857284	4.605681368	0.001066265	0.01193264	-0.787126878	-	-
lnc-C5orf63-2	3.460737034	5.239728386	4.602111036	0.001071967	0.011980416	-0.701570688	-	-
XLOC_001976	4.394200697	5.622424682	4.601271	0.001073313	0.011992256	-0.763070291	-	-
LINC01039	-3.690419012	0.661775783	-4.600710734	0.001074212	0.011999092	-0.79516355	-	-
lnc-LAD1-1	-3.968298676	0.749618534	-4.598781616	0.001077313	0.012027306	-0.798979918	-	-
DCTN1-AS1	5.997683432	4.196377596	4.596410085	0.001081138	0.012060352	-0.811153691	-	-
lnc-ILK-6	3.288695664	0.992250468	4.592423488	0.001087601	0.012125977	-0.769458986	-	-
lnc-ZNF639-1	-4.880953784	1.061439573	-4.591123671	0.001089717	0.012144124	-0.81424817	-	-
VIPR1-AS1	2.784416487	5.083677395	4.591066998	0.001089809	0.012144124	-0.697725801	-	-
lnc-HAUS1-1	6.678607094	7.926109935	4.590860807	0.001090145	0.012144634	-0.812815269	-	-
XLOC_845107	-2.448985937	0.358678219	-4.590649055	0.00109049	0.012145245	-0.815456206	-	-
GCC2-AS1	6.246162201	2.384295585	4.586823359	0.001096749	0.012208444	-0.780342001	-	-
lnc-M6PR-5	2.381732916	0.936706325	4.585757761	0.001098499	0.012221417	-0.768041691	-	-
lnc-CMBL-5	6.092310205	7.648025885	4.583217262	0.001102683	0.012251671	-0.814630682	-	-
lnc-RNF125-2	5.096324092	5.46932142	4.577466247	0.001112217	0.012341213	-0.83858429	-	-
lnc-ATG10-6	6.346992725	10.31015242	4.576558827	0.001113729	0.01235144	-0.800096947	-	-
lnc-ARHGEF38-1	5.491362924	5.842800864	4.574430553	0.001117285	0.012381024	-0.84120507	-	-
lnc-SCML4-1	-4.271426595	1.422888386	-4.572589707	0.00112037	0.012405352	-0.766186441	-	-
lnc-KLHL36-2	3.149393412	9.858391922	4.56945797	0.00112564	0.012453808	-0.838365994	-	-
lnc-ZNF394-2	3.569370661	7.616094874	4.565929907	0.001131608	0.012496696	-0.714155955	-	-
lnc-MPPE1-3	7.323213467	6.655868394	4.563826757	0.001135182	0.012529545	-0.846796623	-	-
lnc-NRIP2-1	5.219366466	4.423565052	4.563481019	0.001135771	0.012531302	-0.85548973	-	-
lnc-FREM3-6	3.689481586	4.517662992	4.563237046	0.001136186	0.012531302	-0.771746928	-	-
lnc-ZNF382-2	2.376881314	0.6984603	4.563029562	0.00113654	0.012531302	-0.753887054	-	-
GTF3C2-AS1	3.76073001	6.267077618	4.562377855	0.001137651	0.012536944	-0.782842781	-	-
XLOC_2839861	4.452459957	1.499585506	4.561090536	0.001139849	0.012557861	-0.858693817	-	-
lnc-DEGS2-6	3.597635543	6.838474753	4.560142226	0.001141472	0.012572423	-0.752743748	-	-
XLOC_2394367	4.344271845	2.490016223	4.55995425	0.001141794	0.012572657	-0.819810663	-	-
lnc-ZFAND1-1	5.666547534	5.875273423	4.559409579	0.001142727	0.012579621	-0.863936231	-	-
UGDH-AS1	3.263809751	10.94125885	4.558525153	0.001144244	0.012593007	-0.849427381	-	-
lnc-NIT2-1	3.852179751	1.201417556	4.555232734	0.00114991	0.012648712	-0.83235596	-	-
lnc-PDAP1-1	4.551156218	5.374853634	4.548736047	0.001161179	0.012759242	-0.864507659	-	-
lnc-NTAN1-1	5.484633858	8.551939332	4.545582435	0.001166692	0.01281308	-0.882401046	-	-
lnc-HMBOX1-2	5.156168849	7.191542714	4.543879618	0.00116968	0.012839153	-0.821376855	-	-
lnc-TLE2-1	4.090353182	4.119097181	4.543229799	0.001170822	0.01284832	-0.821040153	-	-
lnc-BLK-2	4.021358825	5.322750871	4.542073885	0.001172857	0.012860529	-0.878200352	-	-
lnc-UBE2Z-1	3.069532869	8.813286068	4.540282481	0.001176019	0.012885059	-0.880288021	-	-
XLOC_2394807	5.687247603	4.98437612	4.531330369	0.001191953	0.013039149	-0.903109207	-	-
lnc-GTPBP1-2	4.020773878	1.377179492	4.529533087	0.00119518	0.01306761	-0.872237704	-	-
lnc-C5orf39-1	5.532238967	5.666387878	4.529010052	0.00119612	0.013074478	-0.91492141	-	-
lnc-SNX33-2	5.277836729	3.567445243	4.526918967	0.001199889	0.0131054	-0.915321569	-	-
lnc-CD47-7	4.168779115	1.455540802	4.523788476	0.001205555	0.013163847	-0.881610053	-	-
MME-AS1	7.232082142	6.287320196	4.520879558	0.001210846	0.013214715	-0.915257413	-	-
lnc-WBSCR22-4	6.00847201	3.735587796	4.519230236	0.001213857	0.013237209	-0.930240039	-	-
lnc-TCIRG1-1	4.427873331	6.684615694	4.519014683	0.001214251	0.013238054	-0.917443046	-	-
lnc-HBG2-1	5.692850985	5.17765736	4.515731961	0.001220269	0.013293267	-0.929889076	-	-
XLOC_002503	-2.033971607	0.132469497	-4.512380477	0.001226445	0.013344094	-0.842205634	-	-
lnc-TNNC2-1	4.062255141	4.458104506	4.511680449	0.00122774	0.013350312	-0.941485426	-	-
lnc-APITD1-CORT-1	6.577052255	5.078460659	4.508316828	0.001233979	0.013400738	-0.947145713	-	-
lnc-PMM2-6	4.27227163	2.81833663	4.507362641	0.001235755	0.013416542	-0.936232823	-	-
lnc-CCDC43-5	4.169079776	1.562919265	4.501836859	0.001246095	0.013507756	-0.909838267	-	-
lnc-CD2BP2-1	3.814434786	0.6575726	4.501238021	0.001247221	0.013516459	-0.92921119	-	-
MEG3	-4.047945385	1.641311937	-4.492081333	0.001264573	0.013676163	-0.856474112	-	-
lnc-SNX33-1	6.349855331	5.600765517	4.489791116	0.001268953	0.013712895	-0.971447561	-	-
lnc-TOR1AIP2-5	4.996882954	6.495303283	4.486798855	0.001274701	0.013771443	-0.932965589	-	-
lnc-UTP11L-3	-4.903980244	1.060529132	-4.474268537	0.001299069	0.014002158	-0.996463239	-	-
lnc-SMARCC2-4	3.122562893	1.02611351	4.473761784	0.001300065	0.014009282	-0.956705793	-	-
lnc-C1orf167-2	4.450089552	5.863941682	4.469546148	0.001308381	0.014093989	-0.96471053	-	-
lnc-OSBPL7-1	5.532079317	6.995006551	4.466018778	0.001315383	0.014156107	-1.0052529	-	-
lnc-LRIT2-4	6.380483223	8.626517004	4.463523355	0.00132036	0.014202364	-1.01206563	-	-
lnc-WIBG-1	2.623955367	6.096404278	4.453861096	0.001339822	0.014374732	-0.933385037	-	-
lnc-C12orf60-2	-3.787141989	0.801013394	-4.451416451	0.001344794	0.014420679	-1.024862526	-	-
lnc-SCAND1-5	5.821092291	6.379713691	4.449625644	0.001348449	0.014452459	-1.033776411	-	-
lnc-SLCO2B1-2	5.061204477	6.800603508	4.448779164	0.00135018	0.014467306	-0.97906679	-	-
lnc-LRRC57-2	3.459778623	0.569525806	4.444140685	0.001359709	0.014555879	-1.008769065	-	-
lnc-TUBB2A-1	4.609900568	5.523280092	4.440620515	0.001366988	0.014628659	-1.015534085	-	-
XLOC_2712801	4.11274589	3.561135677	4.434946426	0.001378808	0.014740061	-1.036320056	-	-
lnc-TMEM43-1	4.787124173	5.394006504	4.433199906	0.001382468	0.014765839	-1.05921844	-	-
lnc-TGM6-4	3.866734834	6.080619898	4.425895807	0.001397887	0.014905919	-0.957144047	-	-
XLOC_846295	5.511476399	8.715522284	4.423132594	0.001403767	0.014960995	-1.073512258	-	-
lnc-NIPBL-1	6.648222032	5.960994794	4.420040749	0.001410378	0.015023796	-1.082005122	-	-
lnc-ERV3-1-2	-3.656563315	0.751162776	-4.416082716	0.00141889	0.015099079	-1.016260555	-	-
lnc-C6orf146-4	4.894526271	3.837056616	4.415655171	0.001419812	0.015105054	-1.085845718	-	-
lnc-TARBP2-5	3.376589329	0.322697374	4.410348604	0.001431317	0.015213236	-1.07832089	-	-
lnc-C11orf41-1	4.113809274	5.897920339	4.410269765	0.001431489	0.015213236	-1.024934761	-	-
lnc-SRSF2-1	2.755022549	1.983366084	4.405233572	0.0014425	0.015311374	-1.097076727	-	-
lnc-MRPL48-1	4.775472542	8.53353412	4.401493538	0.001450736	0.015387076	-1.101003229	-	-
lnc-C15orf44-1	3.701671628	1.43687458	4.399910543	0.001454237	0.015417422	-1.063844926	-	-
lnc-GRIA3-5	-3.575397396	0.741246823	-4.395295256	0.001464495	0.015509408	-1.044662751	-	-
lnc-RPL30-1	4.646208678	2.951073695	4.390923283	0.001474283	0.015597268	-1.124017696	-	-
XLOC_1176816	6.273040766	7.399479726	4.390671446	0.001474849	0.015599309	-1.124486601	-	-
lnc-GRID2IP-1	6.438163169	5.892531581	4.390321321	0.001475636	0.015603689	-1.125827152	-	-
LINC01359	-4.629485356	0.866420355	-4.389478753	0.001477533	0.015615843	-1.111462328	-	-
lnc-CDK1-3	5.454687427	5.269959564	4.388893379	0.001478851	0.015625833	-1.120740733	-	-
XLOC_006773	5.264627453	5.988210531	4.387892804	0.001481109	0.015645731	-1.117203322	-	-
XLOC_005944	4.575621712	4.043598952	4.387615309	0.001481735	0.015648398	-1.129408187	-	-
lnc-FBN1-3	4.321842291	6.191498176	4.385856771	0.001485713	0.015686446	-1.073362072	-	-
SEMA3F-AS1	5.412921522	6.218248901	4.378368117	0.00150278	0.015850633	-1.133327669	-	-
lnc-MAFF-6	5.582245676	5.845851057	4.374666001	0.001511294	0.015923155	-1.155496843	-	-
lnc-C2orf78-3	4.169998051	4.619771396	4.374339779	0.001512046	0.015924275	-1.138959706	-	-
XLOC_003475	-4.592609419	1.007434008	-4.369374438	0.001523552	0.016033332	-1.163795432	-	-
lnc-TCP10L-3	3.299334396	1.23521501	4.367818387	0.001527176	0.016067433	-1.165408739	-	-
lnc-FAM8A1-2	5.684230035	5.837387287	4.367528699	0.001527852	0.016070501	-1.16132995	-	-
lnc-AC092295.7.1-2	6.077233728	5.142772623	4.360304204	0.001544809	0.016228451	-1.178028636	-	-
lnc-SBF2-4	2.738235584	4.820573015	4.359336458	0.001547096	0.01624431	-1.05180945	-	-
lnc-PRL-13	2.186275249	6.486422423	4.35639935	0.001554057	0.016309217	-0.977637028	-	-
lnc-USP40-2	2.521112113	5.866824943	4.353605483	0.00156071	0.016358512	-0.954663118	-	-
lnc-UBE2K-5	3.218438142	0.504688954	4.352881353	0.001562439	0.016368432	-1.126071524	-	-
lnc-DNAJA1-2	-2.513673	0.5939993	-4.349033	0.001571663	0.01646094	-1.183777	-	-
lnc-RFPL4B-1	-4.834794011	2.346767569	-4.346323749	0.001578192	0.016512779	-1.076740954	-	-
lnc-CD37-1	5.07857	4.671058	4.345813	0.001579425	0.01652155	-1.196848	-	-
LINC00710	-3.521187	0.6143819	-4.342376	0.001587758	0.01658926	-1.195817	-	-
lnc-TAGLN-2	3.577610751	5.920104871	4.342324316	0.001587882	0.016589264	-1.174622471	-	-
lnc-DUXA-1	6.180815	5.72965	4.341563	0.001589735	0.01660447	-1.201517	-	-
LINC00475	-3.505426782	1.568202166	-4.340690659	0.001591859	0.016622501	-1.133387612	-	-
lnc-DCAF6-1	4.172478	9.833477	4.336352	0.001602469	0.01672077	-1.204178	-	-
lnc-OBSCN-3	4.064329101	6.424793454	4.335708149	0.001604051	0.016733105	-1.108749646	-	-
NAPA-AS1	5.495229	6.534928	4.335407	0.001604791	0.01673665	-1.211489	-	-
lnc-GMPR2-1	5.75619	7.343491	4.333726	0.001608929	0.01677144	-1.198822	-	-
XLOC_2714659	5.167662	6.86284	4.330083	0.001617936	0.01685693	-1.21485	-	-
XLOC_1829151	2.671151	0.1213321	4.327881	0.001623404	0.01690245	-1.221612	-	-
XLOC_1585364	6.495586	7.836845	4.327836	0.001623518	0.01690245	-1.222142	-	-
lnc-CCDC159-4	6.384997	9.586496	4.32208	0.001637909	0.01704379	-1.231798	-	-
lnc-CDYL2-6	-4.34928887	1.06799897	-4.320755606	0.001641239	0.017074188	-1.165844293	-	-
XLOC_1015575	4.821118	6.278247	4.311861	0.001663793	0.01728392	-1.215939	-	-
lnc-SEMA4B-2	5.322578	7.100093	4.311827	0.001663879	0.01728392	-1.205531	-	-
lnc-EVX1-15	2.543699	5.393773	4.310844	0.001666393	0.01730574	-1.218137	-	-
lnc-KIF13B-2	6.366408	7.770522	4.310506	0.001667258	0.01731042	-1.250008	-	-
lnc-AC040934.1-1	5.225372	1.128026	4.310226	0.001667974	0.01731356	-1.209581	-	-
lnc-FAM65A-1	-3.005567	1.415503	-4.303572	0.001685106	0.01747404	-1.241492	-	-
lnc-PGBD5-1	4.002371	3.666798	4.302012	0.00168915	0.01751163	-1.253873	-	-
lnc-C8orf22-13	-2.624818	0.4894221	-4.296768	0.001702816	0.01763146	-1.198748	-	-
lnc-RNF166-1	4.720961	4.588955	4.295968	0.001704911	0.01764879	-1.274368	-	-
lnc-ZNF433-1	3.725585	2.749603	4.29168	0.00171619	0.01774358	-1.255646	-	-
CBR3-AS1	4.312747	4.747665	4.290296	0.001719848	0.01776823	-1.288099	-	-
CARS-AS1	4.948518	6.039037	4.289609	0.001721665	0.0177826	-1.278773	-	-
lnc-ZNF391-1	3.030297	1.246136	4.287122	0.001728265	0.01783315	-1.24088	-	-
lnc-ASH2L-1	5.868509	6.579197	4.285762	0.001731886	0.0178617	-1.293675	-	-
LINC-PINT	-2.85828	4.799715	-4.285025	0.001733851	0.01787756	-1.296487	-	-
lnc-RPS6-3	4.777393	1.708905	4.28287	0.001739611	0.01792369	-1.259346	-	-
PTOV1-AS2	4.989894	7.749983	4.281841	0.001742366	0.01794324	-1.29105	-	-
lnc-ABAT-3	3.214235344	5.571225851	4.278315323	0.00175185	0.018036468	-1.157476651	-	-
lnc-C19orf80-1	-3.800861	0.6273159	-4.276422	0.001756965	0.01807621	-1.304499	-	-
lnc-ERAP1-1	4.390939	5.889249	4.27182	0.001769463	0.01819988	-1.308054	-	-
lnc-GJA4-1	3.940148	1.597113	4.266281	0.001784633	0.0183514	-1.275413	-	-
lnc-C20orf96-3	2.126834	7.105798	4.260254	0.001801294	0.01849544	-1.313973	-	-
PRKAR2A-AS1	5.283257	6.594455	4.258555	0.001806019	0.0185394	-1.330222	-	-
lnc-CACNG1-1	5.535252	2.096964	4.256756	0.001811038	0.0185818	-1.269134	-	-
lnc-EEF1B2-1	4.604088	5.452991	4.254324	0.001817846	0.01863082	-1.331025	-	-
lnc-BCAP31-1	2.682709	0.08652623	4.253746	0.00181947	0.01863174	-1.336677	-	-
lnc-CCDC85C-2	5.090837	4.177078	4.253244	0.001820879	0.01863704	-1.346845	-	-
lnc-HSPB1-3	-4.14339	1.171127	-4.249742	0.001830748	0.01871974	-1.265407	-	-
lnc-MDS2-1	-3.08064	0.7261836	-4.249578	0.001831211	0.01871989	-1.263047	-	-
lnc-TAF9-7	-3.571923	0.73185	-4.24748	0.001837152	0.01877144	-1.282858	-	-
lnc-TPSG1-1	3.862128	3.990467	4.246724	0.001839297	0.01878419	-1.328245	-	-
lnc-PURG-1	4.681645	3.889605	4.245186	0.001843671	0.01881966	-1.35961	-	-
lnc-PLCG1-1	5.932194	4.279906	4.239034	0.001861276	0.01898455	-1.369363	-	-
lnc-DHX36-3	6.383668	5.897263	4.235987	0.001870061	0.01905184	-1.364584	-	-
lnc-GRHL2-14	4.338807	3.066917	4.233639	0.00187686	0.01911645	-1.374303	-	-
lnc-FEZ1-2	4.478533	4.257878	4.231209	0.001883926	0.01917908	-1.364964	-	-
lnc-ZBTB4-3	4.644911	6.463108	4.227012	0.001896195	0.01928521	-1.32838	-	-
DLG5-AS1	4.80479	3.382768	4.226468	0.00189779	0.01929674	-1.382395	-	-
ADIRF-AS1	6.658751	10.53921	4.225234	0.001901417	0.01932422	-1.389334	-	-
lnc-SHANK2-5	6.449602	6.625938	4.225059	0.001901932	0.01932476	-1.386774	-	-
lnc-SPPL3.1-3	4.07039	7.346843	4.219753	0.001917614	0.0194699	-1.323722	-	-
lnc-MLLT10-5	-2.979313	0.6147319	-4.217793	0.00192344	0.01951958	-1.310309	-	-
lnc-UMODL1-5	4.31211	5.384235	4.217142	0.001925379	0.01953451	-1.378684	-	-
XLOC_1176926	3.765597	1.829024	4.213107	0.001937448	0.01963791	-1.398968	-	-
XLOC_375823	5.186349	4.033551	4.210469	0.001945379	0.01970874	-1.414706	-	-
lnc-RTN3-1	5.540116	6.685616	4.209179	0.00194927	0.01973861	-1.412318	-	-
lnc-BRAT1-2	5.575022	5.606483	4.206668	0.001956869	0.01981076	-1.418351	-	-
lnc-AMN-3	5.251849	5.122342	4.206397	0.001957692	0.01981429	-1.407566	-	-
lnc-REM2-2	5.531531	5.111602	4.200794	0.00197477	0.01996781	-1.425426	-	-
lnc-PRR11-1	4.362837	4.241429	4.197477	0.001984953	0.02005139	-1.42916	-	-
lnc-USP47-2	5.122464	5.029583	4.196746	0.001987203	0.02006926	-1.375491	-	-
XLOC_934016	5.400843	5.813867	4.194341	0.00199463	0.02011513	-1.42826	-	-
XLOC_1547462	3.119102	1.18837	4.193368	0.001997645	0.02014068	-1.391001	-	-
XLOC_1175315	2.758093	5.263493	4.19221	0.002001237	0.02017202	-1.241059	-	-
lnc-URB2-1	3.253718	5.195152	4.190167	0.002007592	0.02023121	-1.343588	-	-
XLOC_2711915	-4.881878	0.9444594	-4.188692	0.002012194	0.02026781	-1.445865	-	-
lnc-SLC3A2-1	5.311207	5.142466	4.183997	0.002026913	0.02040133	-1.451127	-	-
LINC00842	-3.434277	1.548085	-4.183647	0.002028015	0.02040751	-1.446323	-	-
lnc-RNF24-1	3.927142	5.287994	4.182012	0.00203317	0.02045446	-1.415908	-	-
lnc-GDPD4-1	3.7865	7.627844	4.181289	0.002035455	0.02047252	-1.349014	-	-
lnc-COL4A4-2	-4.290214	1.522725	-4.177764	0.002046632	0.02056516	-1.393574	-	-
lnc-IKZF1-2	6.196291	5.799674	4.172194	0.002064422	0.02069042	-1.47493	-	-
lnc-ESCO2-1	6.069035	5.246881	4.172003	0.002065034	0.02069042	-1.461088	-	-
lnc-ADAM21-4	4.679301	0.8825961	4.171677	0.002066081	0.02069099	-1.473484	-	-
lnc-TK2-2	3.748675	3.490612	4.170728	0.002069131	0.02071658	-1.451839	-	-
lnc-PPIAL4G-5	-3.331311	0.989773	-4.16924	0.002073925	0.02075961	-1.427235	-	-
lnc-NAA60-1	5.190141	5.894795	4.166796	0.002081821	0.02081871	-1.463967	-	-
[truncated: 366 more rows]
