# Supplementary material for: LncRNAs induce oxidative stress and spermatogenesis by regulating endoplasmic reticulum genes and pathways
Source: Aging (Albany NY). 2021 May 6;13(10):13764–87. doi: 10.18632/aging.202971 (PMC8202879; doi:10.18632/aging.202971)
Supplement: Supplementary Table 2 [file aging-13-202971-s002.csv]

Supplementary Table 2. DEG_mrna.
GeneID	logFC	AveExpr	t	P.Value	adj.P.Val	B	Symbol	Symbol_new
59348	7.336254067	2.582523908	35.6453443	1.43E-11	3.16E-08	13.94700287	ZNF350;zinc finger protein 350	ZNF350
283651	9.02676412	3.513043581	32.39526902	3.58E-11	3.36E-08	14.03521859	HMGN2P46;high mobility group nucleosomal binding domain 2 pseudogene 46	HMGN2P46
146956	7.82265778	3.537802515	32.30901192	3.68E-11	3.36E-08	13.85966748	EME1;essential meiotic structure-specific endonuclease 1	EME1
164633	8.243163797	4.462545942	32.29579932	3.69E-11	3.36E-08	13.62082749	CABP7;calcium binding protein 7	CABP7
125111	8.45251495	4.356406322	32.22269916	3.77E-11	3.36E-08	13.85190118	GJD3;gap junction protein, delta 3, 31.9kDa	GJD3
692094	8.39710941	4.251745591	31.92338804	4.12E-11	3.45E-08	13.91867389	MSMP;microseminoprotein, prostate associated	MSMP
8896	6.498332855	2.25522569	29.47231922	8.85E-11	5.68E-08	13.48311209	BUD31;BUD31 homolog (S. cerevisiae)	BUD31
148808	7.073111389	3.412600117	29.47231776	8.85E-11	5.68E-08	13.36966934	MFSD4;major facilitator superfamily domain containing 4	MFSD4
11267	5.93271696	1.886781369	29.35933688	9.18E-11	5.68E-08	13.21379081	SNF8;SNF8, ESCRT-II complex subunit	SNF8
51003	6.986587235	3.171090095	29.20775733	9.65E-11	5.68E-08	13.34399964	MED31;mediator complex subunit 31	MED31
3206	7.704079447	2.880970422	29.00313153	1.03E-10	5.68E-08	13.01676404	HOXA10;homeobox A10	HOXA10
51399	7.058647684	2.56898559	28.03325055	1.43E-10	6.68E-08	13.23563142	TRAPPC4;trafficking protein particle complex 4	TRAPPC4
100130771	7.244548026	2.650959215	27.93453706	1.48E-10	6.78E-08	13.21871873	EFCAB10;EF-hand calcium binding domain 10	EFCAB10
340719	7.507104435	3.714449186	27.87994225	1.50E-10	6.78E-08	13.24400201	NANOS1;nanos homolog 1 (Drosophila)	NANOS1
51282	6.752214984	3.30225706	27.80726	1.54E-10	6.86E-08	13.25437441	SCAND1;SCAN domain containing 1	SCAND1
29893	8.194086824	3.78123167	27.34007103	1.81E-10	7.76E-08	13.03845766	PSMC3IP;PSMC3 interacting protein	PSMC3IP
444	-6.433995896	2.362033339	-27.21619213	1.89E-10	7.92E-08	12.94710762	ASPH;aspartate beta-hydroxylase	ASPH
529	6.463281245	3.028812998	27.12326317	1.96E-10	8.02E-08	12.40242342	ATP6V1E1;ATPase, H+ transporting, lysosomal 31kDa, V1 subunit E1	ATP6V1E1
6202	8.20523181	2.505911587	27.09057206	1.98E-10	8.04E-08	11.40405054	RPS8;ribosomal protein S8	RPS8
220988	8.7862206	4.060317146	26.87741974	2.13E-10	8.43E-08	12.94002096	HNRNPA3;heterogeneous nuclear ribonucleoprotein A3	HNRNPA3
29081	7.852154307	3.923591134	26.65258276	2.31E-10	8.79E-08	12.78957918	METTL5;methyltransferase like 5	METTL5
87769	6.693079325	3.02155372	26.56689097	2.38E-10	8.82E-08	12.78331133	GGACT;gamma-glutamylamine cyclotransferase	GGACT
65108	5.984060883	2.944899026	26.42004529	2.51E-10	8.94E-08	12.42112604	MARCKSL1;MARCKS-like 1	MARCKSL1
4201	7.820884351	2.925400615	26.38520387	2.54E-10	8.94E-08	12.93760147	MEA1;male-enhanced antigen 1	MEA1
642843	7.257584202	3.429207707	26.26896179	2.65E-10	9.15E-08	12.92677299	CPSF4L;cleavage and polyadenylation specific factor 4-like	CPSF4L
10971	7.569324655	2.399798174	26.20168868	2.72E-10	9.15E-08	12.05327539	YWHAQ;tyrosine 3-monooxygenase/tryptophan 5-monooxygenase activation protein, theta	YWHAQ
2644	6.314206235	3.170912278	25.62411499	3.36E-10	1.04E-07	12.70397324	GCHFR;GTP cyclohydrolase I feedback regulator	GCHFR
5411	6.086660366	3.076920882	25.47021223	3.56E-10	1.07E-07	12.24932105	PNN;pinin, desmosome associated protein	PNN
374969	6.896509394	3.13708071	25.33918845	3.74E-10	1.08E-07	12.71107284	CCDC23;coiled-coil domain containing 23	CCDC23
10455	6.608736492	2.213714062	25.04668129	4.18E-10	1.19E-07	12.41038711	ECI2;enoyl-CoA delta isomerase 2	ECI2
101928371	7.553750266	3.478462251	25.02897143	4.21E-10	1.19E-07	12.53481425	LOC101928371;uncharacterized LOC101928371	LOC101928371
54812	8.485968144	3.58269766	24.99049685	4.27E-10	1.20E-07	12.48262561	AFTPH;aftiphilin	AFTPH
114625	7.317666719	3.349604197	24.94228208	4.35E-10	1.21E-07	12.32200007	ERMAP;erythroblast membrane-associated protein (Scianna blood group)	ERMAP
10286	5.218395201	1.598356318	24.90616623	4.41E-10	1.21E-07	12.46230946	BCAS2;breast carcinoma amplified sequence 2	BCAS2
8815	7.739711867	2.922074099	24.78893782	4.61E-10	1.23E-07	12.55824567	BANF1;barrier to autointegration factor 1	BANF1
84129	7.030007761	2.026693012	24.65379003	4.86E-10	1.26E-07	12.45043228	ACAD11;acyl-CoA dehydrogenase family, member 11	ACAD11
5052	7.345723561	3.729877191	24.64328962	4.88E-10	1.26E-07	12.14224701	PRDX1;peroxiredoxin 1	PRDX1
7965	6.750826395	2.775476839	24.59732697	4.96E-10	1.27E-07	12.40673798	AIMP2;aminoacyl tRNA synthetase complex-interacting multifunctional protein 2	AIMP2
257177	9.535710696	4.934377313	24.53447608	5.09E-10	1.28E-07	12.5092281	C1orf192;chromosome 1 open reading frame 192	C1orf192
283989	8.360828127	5.100752269	24.50916437	5.14E-10	1.28E-07	12.21627525	TSEN54;TSEN54 tRNA splicing endonuclease subunit	TSEN54
219402	7.425975752	3.442725319	24.46160644	5.23E-10	1.29E-07	12.48825413	MTIF3;mitochondrial translational initiation factor 3	MTIF3
10005	6.280467403	2.133669159	24.17328879	5.86E-10	1.41E-07	12.29510719	ACOT8;acyl-CoA thioesterase 8	ACOT8
23158	6.669945419	3.281493913	23.9445937	6.41E-10	1.49E-07	12.03286927	TBC1D9;TBC1 domain family, member 9 (with GRAM domain)	TBC1D9
10778	6.280567194	2.714122499	23.84856605	6.66E-10	1.50E-07	12.04030253	ZNF271;zinc finger protein 271	ZNF271
8683	6.460639632	2.259317278	23.83516802	6.70E-10	1.50E-07	12.30521825	SRSF9;serine/arginine-rich splicing factor 9	SRSF9
283463	-8.046770406	3.689430998	-23.64420922	7.23E-10	1.55E-07	12.02124145	MUC19;mucin 19, oligomeric	MUC19
51524	6.417659389	2.940713714	23.62462975	7.28E-10	1.55E-07	12.23678012	TMEM138;transmembrane protein 138	TMEM138
5648	-6.410490031	2.878973	-23.60862648	7.33E-10	1.56E-07	11.90961592	MASP1;mannan-binding lectin serine peptidase 1 (C4/C2 activating component of Ra-reactive factor)	MASP1
6164	6.298216463	3.060513667	23.51948427	7.60E-10	1.59E-07	11.85168143	RPL34;ribosomal protein L34	RPL34
54785	5.04583428	2.472590497	23.48390092	7.71E-10	1.59E-07	11.69258677	C17orf59;chromosome 17 open reading frame 59	C17orf59
56985	6.774709112	3.291734119	23.4636012	7.77E-10	1.59E-07	12.22893849	ADPRM;ADP-ribose/CDP-alcohol diphosphatase, manganese-dependent	ADPRM
100286844	6.972480697	3.982035924	23.45644372	7.80E-10	1.59E-07	11.92416151	BCDIN3D-AS1;BCDIN3D antisense RNA 1	BCDIN3D-AS1
51249	6.243626392	2.128888621	23.36710406	8.08E-10	1.60E-07	12.1581163	TMEM69;transmembrane protein 69	TMEM69
388341	8.029087691	5.665547957	23.07182092	9.12E-10	1.73E-07	11.89253515	LRRC75A;leucine rich repeat containing 75A	LRRC75A
403323	7.644644158	4.590515492	23.06361651	9.15E-10	1.73E-07	11.75557816	LOC403323;uncharacterized LOC403323	LOC403323
286190	7.690354371	4.307978495	22.37326502	1.22E-09	2.05E-07	11.70442045	LOC286190;uncharacterized LOC286190	LOC286190
55222	-6.753115027	2.565328124	-22.34026868	1.24E-09	2.07E-07	11.81971647	LRRC20;leucine rich repeat containing 20	LRRC20
154091	6.292495824	2.842738323	22.28397232	1.27E-09	2.09E-07	11.87929065	SLC2A12;solute carrier family 2 (facilitated glucose transporter), member 12	SLC2A12
5894	6.404296486	2.926679907	22.1752659	1.33E-09	2.17E-07	11.80947128	RAF1;Raf-1 proto-oncogene, serine/threonine kinase	RAF1
10302	7.884755044	5.433668165	22.12178463	1.36E-09	2.20E-07	11.74778074	SNAPC5;small nuclear RNA activating complex, polypeptide 5, 19kDa	SNAPC5
5733	-6.863140651	2.467517863	-22.08055644	1.38E-09	2.21E-07	11.82830539	PTGER3;prostaglandin E receptor 3 (subtype EP3)	PTGER3
7404	6.686120476	2.430417672	21.98611881	1.44E-09	2.27E-07	11.79447221	UTY;ubiquitously transcribed tetratricopeptide repeat containing, Y-linked	UTY
4694	5.798817769	1.743949973	21.96937087	1.45E-09	2.27E-07	11.60729201	NDUFA1;NADH dehydrogenase (ubiquinone) 1 alpha subcomplex, 1, 7.5kDa	NDUFA1
83939	7.368758342	3.267939225	21.96298649	1.46E-09	2.27E-07	11.70129485	EIF2A;eukaryotic translation initiation factor 2A, 65kDa	EIF2A
6917	6.170225416	2.67994855	21.88860496	1.50E-09	2.32E-07	11.64466504	TCEA1;transcription elongation factor A (SII), 1	TCEA1
56154	-7.110486638	2.120924607	-21.72715394	1.61E-09	2.46E-07	11.65921313	TEX15;testis expressed 15	TEX15
83854	7.83296485	3.607461864	21.66080803	1.66E-09	2.52E-07	11.70079232	ANGPTL6;angiopoietin-like 6	ANGPTL6
10657	6.563079779	3.359647235	21.64621212	1.67E-09	2.52E-07	11.37666455	KHDRBS1;KH domain containing, RNA binding, signal transduction associated 1	KHDRBS1
762	-5.488656969	1.893441067	-21.49022025	1.79E-09	2.65E-07	11.5264385	CA4;carbonic anhydrase IV	CA4
51318	5.140817503	2.540548339	21.44044424	1.83E-09	2.66E-07	11.35050924	MRPL35;mitochondrial ribosomal protein L35	MRPL35
956	6.031346608	2.265656344	21.37025821	1.89E-09	2.69E-07	11.49449274	ENTPD3;ectonucleoside triphosphate diphosphohydrolase 3	ENTPD3
50943	7.382582691	3.922041186	21.36935169	1.89E-09	2.69E-07	11.5636207	FOXP3;forkhead box P3	FOXP3
5479	6.459748366	2.93999899	21.23225813	2.01E-09	2.80E-07	11.50930967	PPIB;peptidylprolyl isomerase B (cyclophilin B)	PPIB
774	-7.47514753	2.697195554	-21.20932972	2.03E-09	2.81E-07	11.53455702	CACNA1B;calcium channel, voltage-dependent, N type, alpha 1B subunit	CACNA1B
200634	6.497594488	3.12381546	21.1744889	2.06E-09	2.82E-07	11.50632537	KRTCAP3;keratinocyte associated protein 3	KRTCAP3
85457	6.248423574	2.805505711	21.17115121	2.06E-09	2.82E-07	11.46514706	CIPC;CLOCK-interacting pacemaker	CIPC
7580	6.403692942	2.288597077	21.14368929	2.09E-09	2.84E-07	11.4768057	ZNF32;zinc finger protein 32	ZNF32
51646	6.009295023	2.648699096	20.94994891	2.28E-09	3.00E-07	11.35100096	YPEL5;yippee-like 5 (Drosophila)	YPEL5
23207	-5.591596183	3.521896135	-20.92742227	2.30E-09	3.02E-07	11.38289336	PLEKHM2;pleckstrin homology domain containing, family M (with RUN domain) member 2	PLEKHM2
138311	6.703353906	3.040009566	20.60987576	2.66E-09	3.35E-07	11.29423318	FAM69B;family with sequence similarity 69, member B	FAM69B
123803	5.832116142	1.979733414	20.60491244	2.66E-09	3.35E-07	11.31876989	NTAN1;N-terminal asparagine amidase	NTAN1
646450	7.288180101	4.321660149	20.51030345	2.78E-09	3.47E-07	11.13962814	ARIH2OS;ariadne homolog 2 opposite strand	ARIH2OS
55150	6.281384989	2.842012632	20.36147771	2.98E-09	3.63E-07	11.14243848	C19orf73;chromosome 19 open reading frame 73	C19orf73
284217	-6.613838817	2.814049031	-20.33693238	3.01E-09	3.63E-07	11.07328809	LAMA1;laminin, alpha 1	LAMA1
55312	7.095590055	3.161807805	20.31116621	3.05E-09	3.63E-07	11.17349345	RFK;riboflavin kinase	RFK
9488	5.726708639	2.777940377	20.26817747	3.11E-09	3.65E-07	11.13277768	PIGB;phosphatidylinositol glycan anchor biosynthesis, class B	PIGB
84923	6.666613128	2.98234778	20.26611615	3.11E-09	3.65E-07	11.21172521	FAM104A;family with sequence similarity 104, member A	FAM104A
6427	5.527546148	2.935275587	20.22960126	3.17E-09	3.69E-07	11.03569113	SRSF2;serine/arginine-rich splicing factor 2	SRSF2
25871	7.23291331	4.977193279	20.1231294	3.33E-09	3.80E-07	10.66255377	C3orf17;chromosome 3 open reading frame 17	C3orf17
63917	5.235162047	2.388684356	20.1106252	3.35E-09	3.81E-07	10.88452075	GALNT11;polypeptide N-acetylgalactosaminyltransferase 11	GALNT11
283310	-6.717119059	3.123739158	-20.06469877	3.42E-09	3.87E-07	11.08639654	OTOGL;otogelin-like	OTOGL
6187	5.749439027	2.111866094	20.0413035	3.46E-09	3.89E-07	11.0985665	RPS2;ribosomal protein S2	RPS2
8800	5.993587729	2.573039293	19.98923547	3.55E-09	3.98E-07	10.99397133	PEX11A;peroxisomal biogenesis factor 11 alpha	PEX11A
151636	7.240834027	4.034907636	19.94653773	3.62E-09	4.03E-07	10.90816223	DTX3L;deltex 3 like, E3 ubiquitin ligase	DTX3L
8467	6.90832839	3.15380745	19.89792748	3.70E-09	4.07E-07	11.00415008	SMARCA5;SWI/SNF related, matrix associated, actin dependent regulator of chromatin, subfamily a, member 5	SMARCA5
6261	-7.409448898	3.508039359	-19.8604958	3.77E-09	4.11E-07	10.99449892	RYR1;ryanodine receptor 1 (skeletal)	RYR1
4915	-6.845964216	3.030624098	-19.78919589	3.90E-09	4.20E-07	10.96325228	NTRK2;neurotrophic tyrosine kinase, receptor, type 2	NTRK2
23091	5.758286816	2.726918247	19.76304745	3.95E-09	4.24E-07	10.93189471	ZC3H13;zinc finger CCCH-type containing 13	ZC3H13
287	-7.448500542	2.749094122	-19.74792422	3.98E-09	4.25E-07	11.03670646	ANK2;ankyrin 2, neuronal	ANK2
9088	5.867936503	2.895941808	19.71929043	4.03E-09	4.28E-07	10.72508764	PKMYT1;protein kinase, membrane associated tyrosine/threonine 1	PKMYT1
55624	5.314914501	3.405729762	19.67136815	4.13E-09	4.35E-07	10.63533777	POMGNT1;protein O-linked mannose N-acetylglucosaminyltransferase 1 (beta 1,2-)	POMGNT1
79086	5.904151982	1.100595306	19.46827913	4.55E-09	4.70E-07	10.45421093	SMIM7;small integral membrane protein 7	SMIM7
29761	-6.081146554	2.792120388	-19.45413235	4.58E-09	4.70E-07	10.4630179	USP25;ubiquitin specific peptidase 25	USP25
650794	7.518479541	2.780751867	19.43870971	4.62E-09	4.70E-07	10.93083726	MIPEPP3;mitochondrial intermediate peptidase pseudogene 3	MIPEPP3
10210	6.76658479	2.817951183	19.43817554	4.62E-09	4.70E-07	10.82746766	TOPORS;topoisomerase I binding, arginine/serine-rich, E3 ubiquitin protein ligase	TOPORS
7551	7.496281429	3.915016435	19.37049786	4.77E-09	4.81E-07	10.83992392	ZNF3;zinc finger protein 3	ZNF3
10740	6.348809709	3.484280252	19.31454264	4.90E-09	4.92E-07	10.78504936	RFPL1S;RFPL1 antisense RNA 1	RFPL1S
4843	-6.402277258	2.897659755	-19.1101591	5.42E-09	5.32E-07	10.42258892	NOS2;nitric oxide synthase 2, inducible	NOS2
729975	4.848793738	1.459521972	19.05455314	5.57E-09	5.41E-07	10.78118745	FLJ30403;uncharacterized LOC729975	FLJ30403
10629	7.007790296	4.771983899	19.03947908	5.61E-09	5.43E-07	10.76362714	TAF6L;TAF6-like RNA polymerase II, p300/CBP-associated factor (PCAF)-associated factor, 65kDa	TAF6L
168507	-6.642480527	3.204309596	-18.83953083	6.20E-09	5.85E-07	10.60181439	PKD1L1;polycystic kidney disease 1 like 1	PKD1L1
257	6.423004956	4.41840289	18.76076232	6.45E-09	6.01E-07	10.64064409	ALX3;ALX homeobox 3	ALX3
123207	8.305663138	4.526007242	18.57243826	7.09E-09	6.45E-07	10.57521357	C15orf40;chromosome 15 open reading frame 40	C15orf40
51161	5.612439466	2.688461632	18.51558891	7.30E-09	6.61E-07	10.57731021	C3orf18;chromosome 3 open reading frame 18	C3orf18
100506710	6.061123073	2.638364533	18.48501416	7.42E-09	6.68E-07	10.51127244	EBLN3;endogenous Bornavirus-like nucleoprotein 3	EBLN3
643677	-7.423714882	2.823482524	-18.38113719	7.82E-09	6.93E-07	10.52716816	CCDC168;coiled-coil domain containing 168	CCDC168
1831	7.630672246	3.54293974	18.36284329	7.89E-09	6.96E-07	10.24589697	TSC22D3;TSC22 domain family, member 3	TSC22D3
5908	5.421404618	2.121691434	18.27603506	8.25E-09	7.16E-07	10.41451306	RAP1B;RAP1B, member of RAS oncogene family	RAP1B
84513	6.215872634	3.066796479	18.20369294	8.57E-09	7.35E-07	10.45623975	PPAPDC1B;phosphatidic acid phosphatase type 2 domain containing 1B	PPAPDC1B
5789	-6.008301582	3.506991042	-18.19856941	8.59E-09	7.35E-07	10.02878652	PTPRD;protein tyrosine phosphatase, receptor type, D	PTPRD
84269	5.243018903	2.197176224	18.19609377	8.60E-09	7.35E-07	10.35955159	CHCHD5;coiled-coil-helix-coiled-coil-helix domain containing 5	CHCHD5
8192	4.482582245	2.009126233	18.19098081	8.62E-09	7.35E-07	10.35917074	CLPP;caseinolytic mitochondrial matrix peptidase proteolytic subunit	CLPP
5501	6.760996495	2.987028882	18.15804194	8.77E-09	7.46E-07	10.33296641	PPP1CC;protein phosphatase 1, catalytic subunit, gamma isozyme	PPP1CC
347694	-4.755085191	0.95678097	-18.1315944	8.89E-09	7.53E-07	9.708651963	ECEL1P2;endothelin converting enzyme-like 1, pseudogene 2	ECEL1P2
23593	6.683366453	2.610520191	18.10594273	9.01E-09	7.61E-07	9.695420623	HEBP2;heme binding protein 2	HEBP2
5281	7.537301719	3.389135557	18.10003268	9.04E-09	7.62E-07	10.39635076	PIGF;phosphatidylinositol glycan anchor biosynthesis, class F	PIGF
221442	-5.804199655	1.231522248	-18.08897926	9.09E-09	7.63E-07	9.851443862	ADCY10P1;adenylate cyclase 10 (soluble) pseudogene 1	ADCY10P1
91748	5.000809612	2.351934437	18.05232218	9.27E-09	7.73E-07	10.33713535	ELMSAN1;ELM2 and Myb/SANT-like domain containing 1	ELMSAN1
51115	6.373727214	2.880692134	18.05216382	9.27E-09	7.73E-07	10.32057442	RMDN1;regulator of microtubule dynamics 1	RMDN1
340990	-7.119544243	2.558589534	-18.01977775	9.42E-09	7.81E-07	10.36636943	OTOG;otogelin	OTOG
2849	-6.785222619	2.43774769	-17.9772562	9.64E-09	7.94E-07	10.33129688	GPR26;G protein-coupled receptor 26	GPR26
347744	7.151862238	3.280354016	17.96033954	9.72E-09	7.97E-07	10.35525887	C6orf52;chromosome 6 open reading frame 52	C6orf52
100507500	5.244529569	2.878222798	17.91264461	9.97E-09	8.11E-07	10.29890888	EGFR-AS1;EGFR antisense RNA 1	EGFR-AS1
11174	-7.803937973	2.947665674	-17.89603281	1.01E-08	8.16E-07	10.25160739	ADAMTS6;ADAM metallopeptidase with thrombospondin type 1 motif, 6	ADAMTS6
10627	6.86759952	1.8410614	17.87405757	1.02E-08	8.23E-07	9.758048871	MYL12A;myosin, light chain 12A, regulatory, non-sarcomeric	MYL12A
57184	6.834133113	2.857126579	17.8732601	1.02E-08	8.23E-07	10.25927811	FAM219B;family with sequence similarity 219, member B	FAM219B
81609	6.00873963	3.656676368	17.82126132	1.05E-08	8.41E-07	10.1491814	SNX27;sorting nexin family member 27	SNX27
9584	6.045437651	2.491648556	17.67611522	1.13E-08	8.99E-07	10.17349962	RBM39;RNA binding motif protein 39	RBM39
285148	5.050051572	1.569102843	17.61538656	1.17E-08	9.24E-07	10.18721748	IAH1;isoamyl acetate-hydrolyzing esterase 1 homolog (S. cerevisiae)	IAH1
2764	6.33493494	2.917533019	17.58033136	1.19E-08	9.38E-07	10.06716842	GMFB;glia maturation factor, beta	GMFB
51015	5.031282408	2.068558751	17.57608797	1.19E-08	9.38E-07	10.03194333	ISOC1;isochorismatase domain containing 1	ISOC1
10501	-5.123090639	1.154801949	-17.56249247	1.20E-08	9.43E-07	10.02514847	SEMA6B;sema domain, transmembrane domain (TM), and cytoplasmic domain, (semaphorin) 6B	SEMA6B
3163	4.786776674	2.140293999	17.54149301	1.21E-08	9.50E-07	10.13205563	HMOX2;heme oxygenase (decycling) 2	HMOX2
5837	-6.448883617	2.67673824	-17.5312484	1.22E-08	9.54E-07	9.919418254	PYGM;phosphorylase, glycogen, muscle	PYGM
5230	6.729481288	2.913994398	17.52682481	1.22E-08	9.54E-07	10.10792047	PGK1;phosphoglycerate kinase 1	PGK1
6165	6.099193332	2.783579533	17.5123304	1.23E-08	9.60E-07	9.986094425	RPL35A;ribosomal protein L35a	RPL35A
57158	-5.202783824	1.358173704	-17.50462126	1.24E-08	9.62E-07	9.563014446	JPH2;junctophilin 2	JPH2
653857	6.006824973	3.734215264	17.48653511	1.25E-08	9.67E-07	9.917134753	ACTR3C;ARP3 actin-related protein 3 homolog C (yeast)	ACTR3C
5467	-4.940156389	1.706033876	-17.48643746	1.25E-08	9.67E-07	9.850234643	PPARD;peroxisome proliferator-activated receptor delta	PPARD
4074	7.386572584	4.285973416	17.47963053	1.25E-08	9.68E-07	10.06799342	M6PR;mannose-6-phosphate receptor (cation dependent)	M6PR
128866	4.641414722	1.330208817	17.46591603	1.26E-08	9.73E-07	10.13604514	CHMP4B;charged multivesicular body protein 4B	CHMP4B
339318	5.373264368	1.435680616	17.41866746	1.30E-08	9.96E-07	10.00418591	ZNF181;zinc finger protein 181	ZNF181
283383	-6.090389284	2.666723856	-17.41455458	1.30E-08	9.97E-07	9.677067159	GPR133;G protein-coupled receptor 133	GPR133
8891	4.918577914	2.03195782	17.36951701	1.33E-08	1.02E-06	10.03954391	EIF2B3;eukaryotic translation initiation factor 2B, subunit 3 gamma, 58kDa	EIF2B3
10899	7.925898877	4.550394961	17.26743451	1.41E-08	1.07E-06	10.0172162	JTB;jumping translocation breakpoint	JTB
10153	9.508285019	4.684970557	17.24644738	1.42E-08	1.08E-06	10.04450669	CEBPZ;CCAAT/enhancer binding protein (C/EBP), zeta	CEBPZ
9498	-7.160271694	2.108235524	-17.23499569	1.43E-08	1.08E-06	9.645167259	SLC4A8;solute carrier family 4, sodium bicarbonate cotransporter, member 8	SLC4A8
9802	7.476307463	3.764190939	17.22824278	1.44E-08	1.08E-06	9.955224432	DAZAP2;DAZ associated protein 2	DAZAP2
3858	6.676673613	2.937685396	17.22403753	1.44E-08	1.08E-06	9.969775736	KRT10;keratin 10	KRT10
126789	5.512588843	2.609998469	17.18440729	1.47E-08	1.10E-06	9.990229319	PUSL1;pseudouridylate synthase-like 1	PUSL1
131873	-5.958831121	2.342220785	-17.15582366	1.49E-08	1.11E-06	9.978146189	COL6A6;collagen, type VI, alpha 6	COL6A6
1281	-6.900895295	3.097824543	-17.10082699	1.54E-08	1.14E-06	9.791993334	COL3A1;collagen, type III, alpha 1	COL3A1
9230	5.857954722	3.089560064	17.0656797	1.57E-08	1.16E-06	9.88142584	RAB11B;RAB11B, member RAS oncogene family	RAB11B
440434	5.03650699	2.591571901	17.03868973	1.59E-08	1.17E-06	9.931959899	LOC440434;aminopeptidase puromycin sensitive pseudogene	LOC440434
91695	7.27759338	3.310955326	16.97757804	1.65E-08	1.20E-06	9.839155602	RRP7B;ribosomal RNA processing 7 homolog B (S. cerevisiae)	RRP7B
64478	-6.571255332	3.888757329	-16.93627431	1.69E-08	1.22E-06	9.571049336	CSMD1;CUB and Sushi multiple domains 1	CSMD1
253714	-5.942035227	1.864848855	-16.93580682	1.69E-08	1.22E-06	9.886896899	MMS22L;MMS22-like, DNA repair protein	MMS22L
6201	7.354658452	3.127636077	16.93086425	1.69E-08	1.22E-06	9.848096865	RPS7;ribosomal protein S7	RPS7
885	5.11095109	1.900853978	16.88446858	1.73E-08	1.25E-06	9.791111361	CCK;cholecystokinin	CCK
778	-6.473915828	2.782813758	-16.88181399	1.74E-08	1.25E-06	9.801881674	CACNA1F;calcium channel, voltage-dependent, L type, alpha 1F subunit	CACNA1F
89797	-6.599599307	4.087267312	-16.86225067	1.76E-08	1.26E-06	9.16933322	NAV2;neuron navigator 2	NAV2
8766	7.835684739	2.706691397	16.85782875	1.76E-08	1.27E-06	9.787775975	RAB11A;RAB11A, member RAS oncogene family	RAB11A
25987	5.121913654	1.61337563	16.84520854	1.77E-08	1.27E-06	9.851242499	TSKU;tsukushi, small leucine rich proteoglycan	TSKU
26033	-6.904060202	2.425608377	-16.78695166	1.83E-08	1.30E-06	9.836603034	ATRNL1;attractin-like 1	ATRNL1
55361	5.182578332	2.488107501	16.76592743	1.85E-08	1.31E-06	9.742398881	PI4K2A;phosphatidylinositol 4-kinase type 2 alpha	PI4K2A
100505549	7.104495878	3.149381768	16.76021008	1.86E-08	1.31E-06	9.753406948	LOC100505549;uncharacterized LOC100505549	LOC100505549
285761	8.149749109	4.61703544	16.70925242	1.91E-08	1.34E-06	9.736286362	DCBLD1;discoidin, CUB and LCCL domain containing 1	DCBLD1
387911	8.725258094	5.072054182	16.67762463	1.95E-08	1.35E-06	9.719423937	C1QTNF9B;C1q and tumor necrosis factor related protein 9B	C1QTNF9B
10229	6.190290252	2.026550419	16.66984681	1.96E-08	1.35E-06	9.734909173	COQ7;coenzyme Q7 homolog, ubiquinone (yeast)	COQ7
7799	5.893558893	1.926255046	16.60895014	2.02E-08	1.38E-06	9.746250519	PRDM2;PR domain containing 2, with ZNF domain	PRDM2
80321	5.552952834	2.097977685	16.58155526	2.06E-08	1.40E-06	9.686575519	CEP70;centrosomal protein 70kDa	CEP70
10216	3.832429471	3.987066574	16.55810641	2.08E-08	1.41E-06	9.523427063	PRG4;proteoglycan 4	PRG4
1072	6.148130947	3.154226389	16.51760096	2.13E-08	1.44E-06	9.676509201	CFL1;cofilin 1 (non-muscle)	CFL1
26031	-6.500796874	2.838509294	-16.50159862	2.15E-08	1.45E-06	9.523821795	OSBPL3;oxysterol binding protein-like 3	OSBPL3
286144	6.338934086	1.997609183	16.44857651	2.22E-08	1.48E-06	9.40482683	TRIQK;triple QxxK/R motif containing	TRIQK
2200	-6.408600988	2.942708261	-16.38062546	2.30E-08	1.53E-06	9.576903131	FBN1;fibrillin 1	FBN1
286075	-6.189321121	2.042054126	-16.31727783	2.39E-08	1.58E-06	9.489288667	ZNF707;zinc finger protein 707	ZNF707
80152	6.269454867	3.438886852	16.2712593	2.45E-08	1.61E-06	9.562981369	CENPT;centromere protein T	CENPT
10412	8.039628498	3.601017336	16.23441392	2.50E-08	1.64E-06	9.494738948	NSA2;NSA2 ribosome biogenesis homolog (S. cerevisiae)	NSA2
658	6.355313624	1.97604294	16.2110974	2.54E-08	1.65E-06	9.292092744	BMPR1B;bone morphogenetic protein receptor, type IB	BMPR1B
83694	-5.869150353	2.634897498	-16.20259496	2.55E-08	1.66E-06	9.282265532	RPS6KL1;ribosomal protein S6 kinase-like 1	RPS6KL1
5412	6.183621442	3.543178916	16.19912679	2.56E-08	1.66E-06	9.444417993	UBL3;ubiquitin-like 3	UBL3
27236	5.964427126	2.236516037	16.18647064	2.57E-08	1.67E-06	9.453735185	ARFIP1;ADP-ribosylation factor interacting protein 1	ARFIP1
144165	-6.443497255	2.292457986	-16.14803011	2.63E-08	1.70E-06	9.4074543	PRICKLE1;prickle homolog 1 (Drosophila)	PRICKLE1
80179	5.12792798	3.059909069	16.14355291	2.64E-08	1.70E-06	9.456547997	MYO19;myosin XIX	MYO19
6139	7.171956287	1.959773397	16.10313255	2.70E-08	1.73E-06	9.447488799	RPL17;ribosomal protein L17	RPL17
387263	5.603330523	6.049683074	16.07975558	2.74E-08	1.75E-06	9.135551336	C6orf120;chromosome 6 open reading frame 120	C6orf120
134553	5.340481068	0.922565026	16.06715899	2.76E-08	1.76E-06	9.192378034	C5orf24;chromosome 5 open reading frame 24	C5orf24
55715	5.726122824	2.737947982	16.06502299	2.76E-08	1.76E-06	9.381963193	DOK4;docking protein 4	DOK4
134121	5.813832925	2.899313156	16.06347719	2.76E-08	1.76E-06	9.47549782	C5orf49;chromosome 5 open reading frame 49	C5orf49
79974	-6.794911232	2.411166991	-16.05314494	2.78E-08	1.77E-06	9.486509131	CPED1;cadherin-like and PC-esterase domain containing 1	CPED1
10498	5.759180238	2.757712857	16.03686788	2.81E-08	1.78E-06	9.476575154	CARM1;coactivator-associated arginine methyltransferase 1	CARM1
9326	6.37222171	3.17676076	15.9773264	2.91E-08	1.83E-06	9.450354486	ZNHIT3;zinc finger, HIT-type containing 3	ZNHIT3
64344	-5.388749292	2.252493255	-15.96661708	2.93E-08	1.84E-06	9.152747549	HIF3A;hypoxia inducible factor 3, alpha subunit	HIF3A
58489	4.738882575	1.249418223	15.95769329	2.94E-08	1.85E-06	8.585492005	ABHD17C;abhydrolase domain containing 17C	ABHD17C
101928147	4.75236078	2.019054408	15.89931368	3.04E-08	1.90E-06	9.338717647	C21orf140;chromosome 21 open reading frame 140	C21orf140
124565	-5.740713355	1.549693437	-15.89586347	3.05E-08	1.90E-06	9.296276206	SLC38A10;solute carrier family 38, member 10	SLC38A10
374654	-6.515291266	2.644141448	-15.84701406	3.14E-08	1.94E-06	9.258894016	KIF7;kinesin family member 7	KIF7
284346	4.614153661	1.864542469	15.80064654	3.22E-08	1.99E-06	9.25412659	ZNF575;zinc finger protein 575	ZNF575
641649	5.513238838	2.509356371	15.78595829	3.25E-08	2.00E-06	9.287164781	TMEM91;transmembrane protein 91	TMEM91
130106	-5.692720579	1.870863181	-15.77466008	3.27E-08	2.01E-06	9.341702939	CIB4;calcium and integrin binding family member 4	CIB4
55325	9.02916206	5.816733738	15.76082174	3.30E-08	2.02E-06	9.328837413	UFSP2;UFM1-specific peptidase 2	UFSP2
6159	7.049802613	1.541806166	15.7527271	3.32E-08	2.02E-06	9.080308847	RPL29;ribosomal protein L29	RPL29
2057	5.361639542	2.388635706	15.66249567	3.50E-08	2.09E-06	9.252805172	EPOR;erythropoietin receptor	EPOR
5569	5.523376946	2.39982613	15.64056306	3.55E-08	2.11E-06	9.169871987	PKIA;protein kinase (cAMP-dependent, catalytic) inhibitor alpha	PKIA
18	6.651514546	3.316148906	15.58227367	3.67E-08	2.17E-06	9.196218282	ABAT;4-aminobutyrate aminotransferase	ABAT
5988	7.702774298	4.079864345	15.57910499	3.68E-08	2.17E-06	9.249175731	RFPL1;ret finger protein-like 1	RFPL1
6517	-5.736984343	2.733204049	-15.56016987	3.72E-08	2.19E-06	9.191272009	SLC2A4;solute carrier family 2 (facilitated glucose transporter), member 4	SLC2A4
375	6.634761266	3.34161133	15.54372241	3.76E-08	2.20E-06	9.130218432	ARF1;ADP-ribosylation factor 1	ARF1
6637	6.055966784	1.198595333	15.52681729	3.80E-08	2.22E-06	8.963749907	SNRPG;small nuclear ribonucleoprotein polypeptide G	SNRPG
11321	6.495385909	2.768702254	15.48792598	3.88E-08	2.27E-06	9.134401901	GPN1;GPN-loop GTPase 1	GPN1
1495	7.529344556	3.41235271	15.48181342	3.90E-08	2.27E-06	9.157349789	CTNNA1;catenin (cadherin-associated protein), alpha 1, 102kDa	CTNNA1
10542	5.517542131	1.779977188	15.41289628	4.06E-08	2.35E-06	9.153892076	LAMTOR5;late endosomal/lysosomal adaptor, MAPK and MTOR activator 5	LAMTOR5
637	7.072674338	3.160723476	15.3782244	4.15E-08	2.40E-06	9.136339442	BID;BH3 interacting domain death agonist	BID
222236	7.993264187	4.033916559	15.36645056	4.18E-08	2.41E-06	9.139582517	NAPEPLD;N-acyl phosphatidylethanolamine phospholipase D	NAPEPLD
55251	5.905754046	2.954094693	15.35332076	4.21E-08	2.42E-06	8.966511817	PCMTD2;protein-L-isoaspartate (D-aspartate) O-methyltransferase domain containing 2	PCMTD2
54752	5.016039073	1.542184851	15.30510509	4.34E-08	2.48E-06	8.962899131	FNDC8;fibronectin type III domain containing 8	FNDC8
6224	9.354150753	2.663234187	15.30384682	4.34E-08	2.48E-06	8.894217887	RPS20;ribosomal protein S20	RPS20
159091	5.830765869	4.288334185	15.22779801	4.55E-08	2.57E-06	8.822694921	FAM122C;family with sequence similarity 122C	FAM122C
134147	5.635204372	2.454525	15.21876077	4.57E-08	2.58E-06	9.015310148	CMBL;carboxymethylenebutenolidase homolog (Pseudomonas)	CMBL
375616	-7.120121946	2.399476222	-15.21187288	4.59E-08	2.58E-06	8.991710828	KCP;kielin/chordin-like protein	KCP
9746	-5.951338506	1.781526082	-15.19099782	4.65E-08	2.59E-06	8.459834781	CLSTN3;calsyntenin 3	CLSTN3
138199	4.840934867	1.906820426	15.15487876	4.76E-08	2.65E-06	8.914227498	C9orf41;chromosome 9 open reading frame 41	C9orf41
256646	-6.091719657	1.800134481	-15.09437634	4.94E-08	2.74E-06	8.981738639	NUTM1;NUT midline carcinoma, family member 1	NUTM1
143162	-5.45712745	1.563180902	-15.08814378	4.95E-08	2.75E-06	8.639712091	FRMPD2;FERM and PDZ domain containing 2	FRMPD2
53635	5.903910588	3.541026905	15.083563	4.97E-08	2.76E-06	8.975970148	PTOV1;prostate tumor overexpressed 1	PTOV1
10087	6.012123503	2.625992904	15.06918612	5.01E-08	2.77E-06	8.885216823	COL4A3BP;collagen, type IV, alpha 3 (Goodpasture antigen) binding protein	COL4A3BP
11068	5.762060656	2.954512704	15.06801163	5.02E-08	2.77E-06	8.981696364	CYB561D2;cytochrome b561 family, member D2	CYB561D2
117247	-4.410597746	0.784988583	-15.02117258	5.16E-08	2.83E-06	8.51669279	SLC16A10;solute carrier family 16 (aromatic amino acid transporter), member 10	SLC16A10
23191	5.888382344	2.947812711	14.98836116	5.27E-08	2.88E-06	8.855881836	CYFIP1;cytoplasmic FMR1 interacting protein 1	CYFIP1
10800	-6.84921922	2.043244783	-14.98288571	5.29E-08	2.88E-06	8.78087499	CYSLTR1;cysteinyl leukotriene receptor 1	CYSLTR1
8872	6.167778783	1.839861683	14.98198266	5.29E-08	2.88E-06	8.931682935	CDC123;cell division cycle 123	CDC123
79628	-7.194954438	1.64535931	-14.95637552	5.37E-08	2.92E-06	8.832780163	SH3TC2;SH3 domain and tetratricopeptide repeats 2	SH3TC2
64112	5.416643951	2.106730018	14.93099525	5.46E-08	2.95E-06	8.824303369	MOAP1;modulator of apoptosis 1	MOAP1
26258	8.20804691	3.758062082	14.92752573	5.47E-08	2.95E-06	8.76565553	BLOC1S6;biogenesis of lysosomal organelles complex-1, subunit 6, pallidin	BLOC1S6
286101	5.985736611	1.531595972	14.89414354	5.59E-08	2.99E-06	8.556484358	ZNF252P;zinc finger protein 252, pseudogene	ZNF252P
2733	5.100993048	2.255347392	14.80473997	5.91E-08	3.14E-06	8.767179884	GLE1;GLE1 RNA export mediator	GLE1
101927905	5.659331924	1.906709333	14.80188048	5.92E-08	3.14E-06	8.83069088	LOC101927905;uncharacterized LOC101927905	LOC101927905
2971	6.511223917	2.814798566	14.79713827	5.94E-08	3.15E-06	8.828976587	GTF3A;general transcription factor IIIA	GTF3A
26286	7.683586152	2.384444652	14.77562548	6.02E-08	3.18E-06	8.780615823	ARFGAP3;ADP-ribosylation factor GTPase activating protein 3	ARFGAP3
51573	7.028432082	3.453497848	14.70600002	6.29E-08	3.29E-06	8.732988362	GDE1;glycerophosphodiester phosphodiesterase 1	GDE1
54777	-7.489263508	3.363757854	-14.7036671	6.30E-08	3.29E-06	8.744531585	TTC40;tetratricopeptide repeat domain 40	TTC40
84895	-5.429581293	2.151075478	-14.6485647	6.52E-08	3.38E-06	8.619001237	FAM73B;family with sequence similarity 73, member B	FAM73B
84457	6.738903328	4.717286837	14.61632832	6.65E-08	3.43E-06	8.704794655	PHYHIPL;phytanoyl-CoA 2-hydroxylase interacting protein-like	PHYHIPL
116228	5.146528416	1.515140681	14.57996373	6.81E-08	3.50E-06	8.690940774	COX20;COX20 cytochrome C oxidase assembly factor	COX20
11170	-6.257024362	1.356404493	-14.5708758	6.85E-08	3.51E-06	8.624315436	FAM107A;family with sequence similarity 107, member A	FAM107A
56647	8.161928903	4.555820263	14.56967928	6.85E-08	3.51E-06	8.693821507	BCCIP;BRCA2 and CDKN1A interacting protein	BCCIP
6194	8.864626085	3.394838302	14.56667897	6.87E-08	3.51E-06	8.513148162	RPS6;ribosomal protein S6	RPS6
57409	5.786812805	1.997482859	14.52185046	7.07E-08	3.59E-06	8.665761594	MIF4GD;MIF4G domain containing	MIF4GD
1528	5.465412268	1.354757361	14.51068176	7.12E-08	3.61E-06	8.326246594	CYB5A;cytochrome b5 type A (microsomal)	CYB5A
729614	6.389977282	3.842854893	14.50056584	7.16E-08	3.63E-06	8.631749637	FLJ37453;uncharacterized LOC729614	FLJ37453
8761	5.927520234	1.739465365	14.49350135	7.19E-08	3.63E-06	8.631198042	PABPC4;poly(A) binding protein, cytoplasmic 4 (inducible form)	PABPC4
114882	5.715435521	2.76258797	14.49025555	7.21E-08	3.64E-06	8.620604461	OSBPL8;oxysterol binding protein-like 8	OSBPL8
10040	4.523377791	3.621767615	14.45675517	7.37E-08	3.70E-06	8.570675866	TOM1L1;target of myb1 (chicken)-like 1	TOM1L1
22809	6.571856391	3.141371361	14.43421507	7.47E-08	3.74E-06	8.631386336	ATF5;activating transcription factor 5	ATF5
112950	5.936183193	2.629436669	14.42547809	7.51E-08	3.76E-06	8.596224708	MED8;mediator complex subunit 8	MED8
57862	4.778963844	3.123608402	14.40845186	7.60E-08	3.79E-06	8.370529653	ZNF410;zinc finger protein 410	ZNF410
340273	-6.605647467	2.307052144	-14.40706914	7.60E-08	3.79E-06	8.609642344	ABCB5;ATP-binding cassette, sub-family B (MDR/TAP), member 5	ABCB5
4594	5.57636074	3.262363197	14.39289418	7.67E-08	3.81E-06	8.535134065	MUT;methylmalonyl CoA mutase	MUT
56474	5.646112324	2.970244395	14.39119341	7.68E-08	3.81E-06	8.526357985	CTPS2;CTP synthase 2	CTPS2
100131257	-6.204436012	1.790945527	-14.3710554	7.78E-08	3.85E-06	8.438544409	LOC100131257;zinc finger protein 655 pseudogene	LOC100131257
3835	3.593358624	2.706751099	14.35669817	7.85E-08	3.88E-06	8.481906176	KIF22;kinesin family member 22	KIF22
55959	-5.452641314	1.409726323	-14.34346908	7.92E-08	3.91E-06	8.268263352	SULF2;sulfatase 2	SULF2
292	5.275887807	1.691397727	14.32753037	8.00E-08	3.94E-06	8.567904754	SLC25A5;solute carrier family 25 (mitochondrial carrier; adenine nucleotide translocator), member 5	SLC25A5
160728	5.999184818	3.621545549	14.29904575	8.15E-08	4.01E-06	8.536582761	SLC5A8;solute carrier family 5 (sodium/monocarboxylate cotransporter), member 8	SLC5A8
84248	5.694059361	3.415763858	14.27497633	8.28E-08	4.07E-06	8.410489557	FYTTD1;forty-two-three domain containing 1	FYTTD1
89766	-7.115180078	2.892528795	-14.24810282	8.43E-08	4.13E-06	8.522502553	UMODL1;uromodulin-like 1	UMODL1
55766	6.26766288	1.559409029	14.19228418	8.74E-08	4.24E-06	8.304248744	H2AFJ;H2A histone family, member J	H2AFJ
100128361	6.068641884	2.126503486	14.14233094	9.03E-08	4.36E-06	8.463584514	LOC100128361;uncharacterized LOC100128361	LOC100128361
57727	4.888580323	2.099975562	14.11678916	9.18E-08	4.43E-06	8.336875381	NCOA5;nuclear receptor coactivator 5	NCOA5
51465	8.397705965	4.624364054	14.0992126	9.29E-08	4.46E-06	8.380805043	UBE2J1;ubiquitin-conjugating enzyme E2, J1	UBE2J1
3749	-5.136117407	2.387570173	-14.0688278	9.47E-08	4.54E-06	8.300851669	KCNC4;potassium voltage-gated channel, Shaw-related subfamily, member 4	KCNC4
9754	-6.350125276	1.385903584	-14.06714394	9.48E-08	4.54E-06	8.171169826	STARD8;StAR-related lipid transfer (START) domain containing 8	STARD8
5003	4.076187239	1.943146086	14.05911401	9.53E-08	4.56E-06	8.318546623	SLC22A18AS;solute carrier family 22 (organic cation transporter), member 18 antisense	SLC22A18AS
2318	-6.412060388	2.895657977	-13.94159852	1.03E-07	4.87E-06	8.251329712	FLNC;filamin C, gamma	FLNC
126074	4.963743414	2.177565	13.9244572	1.04E-07	4.92E-06	8.318940369	SWSAP1;SWIM-type zinc finger 7 associated protein 1	SWSAP1
9722	-5.812332488	2.537241958	-13.92333593	1.04E-07	4.92E-06	8.139428152	NOS1AP;nitric oxide synthase 1 (neuronal) adaptor protein	NOS1AP
81614	5.723749209	3.186975246	13.90668124	1.05E-07	4.97E-06	8.291982632	NIPA2;non imprinted in Prader-Willi/Angelman syndrome 2	NIPA2
25828	4.647903975	1.408982046	13.89517569	1.06E-07	5.00E-06	8.314412492	TXN2;thioredoxin 2	TXN2
5570	-5.745857832	1.307205873	-13.84128364	1.10E-07	5.17E-06	8.159351135	PKIB;protein kinase (cAMP-dependent, catalytic) inhibitor beta	PKIB
3113	6.951199846	3.174873899	13.83738779	1.10E-07	5.17E-06	8.282726722	HLA-DPA1;major histocompatibility complex, class II, DP alpha 1	HLA-DPA1
9057	6.21846528	2.843443408	13.83470412	1.11E-07	5.17E-06	8.243401295	SLC7A6;solute carrier family 7 (amino acid transporter light chain, y+L system), member 6	SLC7A6
100131626	4.936681217	3.061775106	13.82473969	1.11E-07	5.20E-06	8.230499469	LOC100131626;uncharacterized LOC100131626	LOC100131626
1607	-6.812332166	2.314851697	-13.81879489	1.12E-07	5.21E-06	8.268808093	DGKB;diacylglycerol kinase, beta 90kDa	DGKB
55567	-5.861986745	2.785541876	-13.80886451	1.13E-07	5.24E-06	8.074608297	DNAH3;dynein, axonemal, heavy chain 3	DNAH3
151056	-6.594785748	2.27504456	-13.78179873	1.15E-07	5.32E-06	8.245976732	PLB1;phospholipase B1	PLB1
79912	7.317289573	4.200574077	13.76665046	1.16E-07	5.37E-06	8.226018265	PYROXD1;pyridine nucleotide-disulphide oxidoreductase domain 1	PYROXD1
5511	5.063839933	3.032680312	13.75537815	1.17E-07	5.39E-06	8.162575754	PPP1R8;protein phosphatase 1, regulatory subunit 8	PPP1R8
126	-3.960424985	0.919106545	-13.75074414	1.17E-07	5.39E-06	7.990046609	ADH1C;alcohol dehydrogenase 1C (class I), gamma polypeptide	ADH1C
5515	5.682156626	2.23289737	13.71838334	1.20E-07	5.49E-06	8.198233969	PPP2CA;protein phosphatase 2, catalytic subunit, alpha isozyme	PPP2CA
55182	5.452914402	2.575575774	13.71754784	1.20E-07	5.49E-06	8.208486612	RNF220;ring finger protein 220	RNF220
84693	6.633612131	3.476764538	13.69435035	1.22E-07	5.56E-06	8.180011979	MCEE;methylmalonyl CoA epimerase	MCEE
145282	5.069827204	2.026540846	13.68726702	1.22E-07	5.57E-06	8.168520153	MIPOL1;mirror-image polydactyly 1	MIPOL1
2316	-5.021707641	3.014553989	-13.68707854	1.22E-07	5.57E-06	8.135192976	FLNA;filamin A, alpha	FLNA
10920	4.054978318	1.833191517	13.65508125	1.25E-07	5.68E-06	8.168511371	COPS8;COP9 signalosome subunit 8	COPS8
5289	5.528987876	1.830369246	13.53433184	1.35E-07	6.11E-06	8.095088412	PIK3C3;phosphatidylinositol 3-kinase, catalytic subunit type 3	PIK3C3
256380	-5.965653988	1.261299719	-13.53225531	1.36E-07	6.11E-06	7.878771829	SCML4;sex comb on midleg-like 4 (Drosophila)	SCML4
2976	4.002867448	2.42150252	13.52544485	1.36E-07	6.12E-06	8.05224545	GTF3C2;general transcription factor IIIC, polypeptide 2, beta 110kDa	GTF3C2
3691	-6.211788667	2.462140461	-13.5207335	1.37E-07	6.13E-06	8.088207642	ITGB4;integrin, beta 4	ITGB4
284889	3.970776096	10.09731584	13.47699174	1.41E-07	6.28E-06	7.989598056	LOC284889;uncharacterized LOC284889	LOC284889
442075	4.885870333	3.092880784	13.4645945	1.42E-07	6.32E-06	8.028417987	EMC3-AS1;EMC3 antisense RNA 1	EMC3-AS1
25833	-5.791905462	1.534857354	-13.45317817	1.43E-07	6.37E-06	8.0417806	POU2F3;POU class 2 homeobox 3	POU2F3
81554	4.36958856	2.279081804	13.42689305	1.46E-07	6.48E-06	7.97591733	WBSCR16;Williams-Beuren syndrome chromosome region 16	WBSCR16
10460	-5.700470609	1.993930561	-13.41836267	1.47E-07	6.50E-06	8.024727998	TACC3;transforming, acidic coiled-coil containing protein 3	TACC3
273	-5.987859901	2.184240312	-13.394533	1.49E-07	6.60E-06	7.994819897	AMPH;amphiphysin	AMPH
497190	-5.529273514	1.591539772	-13.38738335	1.50E-07	6.62E-06	7.872237653	CLEC18B;C-type lectin domain family 18, member B	CLEC18B
5361	-6.758050723	1.553234783	-13.38700939	1.50E-07	6.62E-06	7.923809172	PLXNA1;plexin A1	PLXNA1
8736	-6.72282986	1.471584541	-13.37622012	1.51E-07	6.66E-06	7.892250021	MYOM1;myomesin 1	MYOM1
7314	7.599489575	1.738368898	13.33208032	1.56E-07	6.85E-06	7.835219074	UBB;ubiquitin B	UBB
5818	-5.740264471	1.989996117	-13.31366199	1.58E-07	6.91E-06	7.859699375	PVRL1;poliovirus receptor-related 1 (herpesvirus entry mediator C)	PVRL1
29068	4.609784758	2.117462202	13.28941331	1.60E-07	7.01E-06	7.923613551	ZBTB44;zinc finger and BTB domain containing 44	ZBTB44
8455	-5.949535823	1.982174211	-13.27570683	1.62E-07	7.07E-06	7.85171451	ATRN;attractin	ATRN
57504	-4.659905402	2.118971787	-13.2424805	1.65E-07	7.20E-06	7.880639857	MTA3;metastasis associated 1 family, member 3	MTA3
162427	-5.043378388	1.547989605	-13.228175	1.67E-07	7.27E-06	7.493191923	FAM134C;family with sequence similarity 134, member C	FAM134C
4130	-6.252433484	1.858935709	-13.22227009	1.68E-07	7.28E-06	7.502543829	MAP1A;microtubule-associated protein 1A	MAP1A
5336	-6.254755124	2.524694226	-13.22041745	1.68E-07	7.28E-06	7.852581698	PLCG2;phospholipase C, gamma 2 (phosphatidylinositol-specific)	PLCG2
2729	4.867693952	2.574385663	13.17997603	1.73E-07	7.47E-06	7.839573074	GCLC;glutamate-cysteine ligase, catalytic subunit	GCLC
57221	3.339174753	6.221217408	13.14189962	1.77E-07	7.63E-06	7.810942278	KIAA1244;KIAA1244	KIAA1244
9575	4.900163766	3.657302519	13.11055922	1.81E-07	7.77E-06	7.767921309	CLOCK;clock circadian regulator	CLOCK
100128731	5.634794711	1.154542513	13.0753149	1.86E-07	7.90E-06	7.747468625	OST4;oligosaccharyltransferase 4 homolog (S. cerevisiae)	OST4
84467	-6.306480877	2.780821015	-13.07093873	1.87E-07	7.91E-06	7.754502647	FBN3;fibrillin 3	FBN3
57530	4.704487237	2.909228284	13.06080023	1.88E-07	7.95E-06	7.794517952	CGN;cingulin	CGN
29079	5.240116893	1.480907221	13.04859188	1.89E-07	7.99E-06	7.656709608	MED4;mediator complex subunit 4	MED4
729156	7.541725821	4.352138414	13.03703503	1.91E-07	8.04E-06	7.787649494	GTF2IRD1P1;GTF2I repeat domain containing 1 pseusogene 1	GTF2IRD1P1
29781	5.191692217	4.356194852	13.0346137	1.91E-07	8.04E-06	7.63253874	NCAPH2;non-SMC condensin II complex, subunit H2	NCAPH2
652	-4.798411103	0.955531952	-13.02543837	1.93E-07	8.08E-06	7.509613659	BMP4;bone morphogenetic protein 4	BMP4
57568	-5.784918075	3.152373751	-13.00455893	1.95E-07	8.18E-06	7.739333068	SIPA1L2;signal-induced proliferation-associated 1 like 2	SIPA1L2
2677	3.931897793	7.358121809	12.97533769	2.00E-07	8.33E-06	7.357168224	GGCX;gamma-glutamyl carboxylase	GGCX
55795	4.772154629	2.427954916	12.91978577	2.08E-07	8.62E-06	7.690631404	PCID2;PCI domain containing 2	PCID2
162972	4.874814109	2.742200532	12.91380049	2.08E-07	8.64E-06	7.689262329	ZNF550;zinc finger protein 550	ZNF550
23031	-6.169301415	2.749658702	-12.85991337	2.17E-07	8.96E-06	7.653039521	MAST3;microtubule associated serine/threonine kinase 3	MAST3
57582	-5.847594869	2.575692209	-12.8588346	2.17E-07	8.96E-06	7.605970526	KCNT1;potassium channel, subfamily T, member 1	KCNT1
63826	5.608401444	5.620934988	12.84057536	2.20E-07	9.07E-06	7.479937292	SRR;serine racemase	SRR
9070	4.155588972	2.241024835	12.83798958	2.20E-07	9.07E-06	7.60871724	ASH2L;ash2 (absent, small, or homeotic)-like (Drosophila)	ASH2L
60509	3.70328085	7.98577427	12.82949366	2.21E-07	9.10E-06	7.390266945	AGBL5;ATP/GTP binding protein-like 5	AGBL5
130916	4.757569596	2.03309214	12.81206626	2.24E-07	9.20E-06	7.603044121	MTERF4;mitochondrial transcription termination factor 4	MTERF4
80309	-6.201120288	1.357570083	-12.81117276	2.24E-07	9.20E-06	7.460216029	SPHKAP;SPHK1 interactor, AKAP domain containing	SPHKAP
90024	4.918616353	3.106850391	12.80062917	2.26E-07	9.25E-06	7.626163254	FLJ20021;uncharacterized LOC90024	FLJ20021
100631378	5.521826168	1.842407955	12.79117336	2.27E-07	9.31E-06	7.627094253	LOC100631378;uncharacterized 100631378	LOC100631378
4637	7.234993546	2.668016535	12.78387059	2.29E-07	9.34E-06	7.497652539	MYL6;myosin, light chain 6, alkali, smooth muscle and non-muscle	MYL6
1294	-6.661601049	3.339858324	-12.78200302	2.29E-07	9.34E-06	7.595488374	COL7A1;collagen, type VII, alpha 1	COL7A1
55173	4.477639191	1.553504346	12.74284023	2.35E-07	9.57E-06	7.462384586	MRPS10;mitochondrial ribosomal protein S10	MRPS10
387787	5.151618694	2.047604583	12.71800451	2.40E-07	9.72E-06	7.57041648	LIPT2;lipoyl(octanoyl) transferase 2 (putative)	LIPT2
7323	4.783356467	1.061001585	12.7042982	2.42E-07	9.80E-06	7.473614447	UBE2D3;ubiquitin-conjugating enzyme E2D 3	UBE2D3
54187	7.120252129	4.736499471	12.6859463	2.45E-07	9.92E-06	7.509050085	NANS;N-acetylneuraminic acid synthase	NANS
339123	2.859805309	9.774249392	12.65729672	2.50E-07	1.01E-05	7.383923532	JMJD8;jumonji domain containing 8	JMJD8
85352	-5.820498866	1.615834273	-12.64970627	2.52E-07	1.02E-05	7.265864631	KIAA1644;KIAA1644	KIAA1644
9373	5.794183083	1.719758817	12.64245329	2.53E-07	1.02E-05	7.406257628	PLAA;phospholipase A2-activating protein	PLAA
6929	-3.474879006	3.558461667	-12.64161462	2.53E-07	1.02E-05	7.428581029	TCF3;transcription factor 3	TCF3
1773	5.218081074	2.405338937	12.60960481	2.59E-07	1.04E-05	7.491239861	DNASE1;deoxyribonuclease I	DNASE1
9358	-5.575718009	1.809908048	-12.56733737	2.67E-07	1.06E-05	7.368162694	ITGBL1;integrin, beta-like 1 (with EGF-like repeat domains)	ITGBL1
6909	5.025855972	3.057741011	12.56158834	2.68E-07	1.07E-05	7.456650228	TBX2;T-box 2	TBX2
284232	-6.665415186	1.946410695	-12.55759804	2.69E-07	1.07E-05	7.339748236	ANKRD20A9P;ankyrin repeat domain 20 family, member A9, pseudogene	ANKRD20A9P
871	-4.90610275	1.440468034	-12.53776539	2.73E-07	1.08E-05	7.43315551	SERPINH1;serpin peptidase inhibitor, clade H (heat shock protein 47), member 1, (collagen binding protein 1)	SERPINH1
152789	-5.08908428	1.387554602	-12.52260818	2.76E-07	1.09E-05	7.272337965	JAKMIP1;janus kinase and microtubule interacting protein 1	JAKMIP1
30061	5.456523897	1.822498021	12.51174362	2.78E-07	1.10E-05	7.3246964	SLC40A1;solute carrier family 40 (iron-regulated transporter), member 1	SLC40A1
7879	6.758436491	3.381710279	12.50510102	2.80E-07	1.10E-05	7.408814402	RAB7A;RAB7A, member RAS oncogene family	RAB7A
222699	-5.493613921	2.277715429	-12.50338119	2.80E-07	1.10E-05	7.393060247	TOB2P1;transducer of ERBB2, 2 pseudogene 1	TOB2P1
57228	6.141791366	3.113712532	12.50241313	2.80E-07	1.10E-05	7.372864728	SMAGP;small cell adhesion glycoprotein	SMAGP
5747	5.881408778	3.141600274	12.49185741	2.82E-07	1.11E-05	7.403188881	PTK2;protein tyrosine kinase 2	PTK2
375611	-6.265371178	2.624518209	-12.48482588	2.84E-07	1.11E-05	7.339189056	SLC26A5;solute carrier family 26 (anion exchanger), member 5	SLC26A5
57194	-6.502915642	3.130901659	-12.48163242	2.85E-07	1.11E-05	7.153523472	ATP10A;ATPase, class V, type 10A	ATP10A
283459	4.261976604	9.638775827	12.47947323	2.85E-07	1.11E-05	7.36856033	GATC;glutamyl-tRNA(Gln) amidotransferase, subunit C	GATC
2009	-5.195077809	2.134516795	-12.46133544	2.89E-07	1.13E-05	7.311023275	EML1;echinoderm microtubule associated protein like 1	EML1
22904	-6.040180629	2.680716995	-12.45315209	2.91E-07	1.13E-05	7.276632661	SBNO2;strawberry notch homolog 2 (Drosophila)	SBNO2
151050	6.570808555	3.132213848	12.44620193	2.92E-07	1.14E-05	7.395200755	KANSL1L;KAT8 regulatory NSL complex subunit 1-like	KANSL1L
9191	5.856745152	3.053769332	12.43516537	2.94E-07	1.14E-05	7.326907476	DEDD;death effector domain containing	DEDD
3091	5.378550495	1.786948734	12.42715386	2.96E-07	1.15E-05	7.371565678	HIF1A;hypoxia inducible factor 1, alpha subunit (basic helix-loop-helix transcription factor)	HIF1A
3916	-3.910518197	1.343926418	-12.41112556	3.00E-07	1.16E-05	7.195794592	LAMP1;lysosomal-associated membrane protein 1	LAMP1
284654	-4.842246126	1.097015374	-12.40134261	3.02E-07	1.17E-05	7.110859495	RSPO1;R-spondin 1	RSPO1
9836	4.388249453	1.405053426	12.35262828	3.13E-07	1.20E-05	7.291462155	LCMT2;leucine carboxyl methyltransferase 2	LCMT2
51808	5.358780535	2.312349691	12.34104506	3.16E-07	1.21E-05	7.306889429	PHAX;phosphorylated adaptor for RNA export	PHAX
6155	7.156135308	1.552773478	12.33915734	3.16E-07	1.21E-05	7.226014655	RPL27;ribosomal protein L27	RPL27
6136	7.404262166	3.405602152	12.33264638	3.18E-07	1.22E-05	7.314076749	RPL12;ribosomal protein L12	RPL12
6210	7.236014345	1.60896445	12.30573655	3.24E-07	1.24E-05	7.20234911	RPS15A;ribosomal protein S15a	RPS15A
79830	3.955364479	1.884536401	12.30361846	3.24E-07	1.24E-05	7.260833554	ZMYM1;zinc finger, MYM-type 1	ZMYM1
266977	-5.259531789	1.349296167	-12.2868436	3.29E-07	1.25E-05	7.129034701	GPR110;G protein-coupled receptor 110	GPR110
4851	-4.687736853	2.037871517	-12.28156347	3.30E-07	1.25E-05	7.220561932	NOTCH1;notch 1	NOTCH1
25793	5.780970887	2.408068629	12.27921168	3.30E-07	1.26E-05	7.203257993	FBXO7;F-box protein 7	FBXO7
169270	5.544269434	1.018051967	12.24745082	3.38E-07	1.28E-05	7.211566014	ZNF596;zinc finger protein 596	ZNF596
84864	4.766009812	8.259148926	12.23907958	3.40E-07	1.29E-05	7.205019124	MINA;MYC induced nuclear antigen	MINA
255022	-5.856664391	1.2623549	-12.21712359	3.46E-07	1.31E-05	7.072239763	CALHM1;calcium homeostasis modulator 1	CALHM1
8714	-5.53499302	1.917087341	-12.21655108	3.46E-07	1.31E-05	7.22169001	ABCC3;ATP-binding cassette, sub-family C (CFTR/MRP), member 3	ABCC3
7324	4.519411198	0.70333242	12.20153988	3.50E-07	1.32E-05	7.163892518	UBE2E1;ubiquitin-conjugating enzyme E2E 1	UBE2E1
389206	5.743520157	3.148708079	12.19992037	3.51E-07	1.32E-05	7.19188031	BEND4;BEN domain containing 4	BEND4
8813	5.521546068	0.988511498	12.1981959	3.51E-07	1.32E-05	7.178023265	DPM1;dolichyl-phosphate mannosyltransferase polypeptide 1, catalytic subunit	DPM1
254528	5.150722174	0.884722215	12.18197013	3.55E-07	1.34E-05	7.165448243	MEIOB;meiosis specific with OB domains	MEIOB
26155	5.708109391	2.550263084	12.17482723	3.57E-07	1.34E-05	7.194791173	NOC2L;nucleolar complex associated 2 homolog (S. cerevisiae)	NOC2L
150353	4.760599248	0.83154774	12.16159265	3.61E-07	1.35E-05	7.134229898	DNAJB7;DnaJ (Hsp40) homolog, subfamily B, member 7	DNAJB7
3680	5.880815378	3.325816623	12.14992754	3.64E-07	1.36E-05	7.176129219	ITGA9;integrin, alpha 9	ITGA9
26224	6.333224384	3.357032154	12.13709876	3.67E-07	1.37E-05	7.162449483	FBXL3;F-box and leucine-rich repeat protein 3	FBXL3
23389	5.168828551	2.292155028	12.13097278	3.69E-07	1.37E-05	6.955396142	MED13L;mediator complex subunit 13-like	MED13L
1307	-6.930037479	3.190416065	-12.12170754	3.72E-07	1.38E-05	7.157821464	COL16A1;collagen, type XVI, alpha 1	COL16A1
257019	-5.343071576	2.106072781	-12.10575158	3.76E-07	1.39E-05	6.923757773	FRMD3;FERM domain containing 3	FRMD3
111	-5.055489408	1.235801061	-12.10022346	3.78E-07	1.40E-05	7.119006322	ADCY5;adenylate cyclase 5	ADCY5
84515	5.833695124	1.966007979	12.09959657	3.78E-07	1.40E-05	7.145414521	MCM8;minichromosome maintenance complex component 8	MCM8
899	4.408465668	2.974616431	12.06446281	3.88E-07	1.43E-05	7.093612666	CCNF;cyclin F	CCNF
54988	-5.325545328	1.513879161	-12.04957676	3.92E-07	1.44E-05	6.867398664	ACSM5;acyl-CoA synthetase medium-chain family member 5	ACSM5
8189	-4.215672962	2.04273852	-12.0379342	3.96E-07	1.45E-05	7.10857752	SYMPK;symplekin	SYMPK
7678	3.480034315	1.690691583	12.02919407	3.99E-07	1.46E-05	7.105901223	ZNF124;zinc finger protein 124	ZNF124
23587	4.663770541	1.354155862	12.01604424	4.02E-07	1.47E-05	7.089323843	ELP5;elongator acetyltransferase complex subunit 5	ELP5
2665	6.499933488	3.485586067	12.0134968	4.03E-07	1.47E-05	7.067756671	GDI2;GDP dissociation inhibitor 2	GDI2
642361	5.469891326	1.653516492	12.01092301	4.04E-07	1.47E-05	7.083645288	LOC642361;uncharacterized LOC642361	LOC642361
57180	3.702255453	1.026026269	11.99928952	4.08E-07	1.48E-05	7.027296029	ACTR3B;ARP3 actin-related protein 3 homolog B (yeast)	ACTR3B
114795	-5.634623839	1.150155525	-11.98471301	4.12E-07	1.50E-05	6.929700309	TMEM132B;transmembrane protein 132B	TMEM132B
7462	5.303245847	1.864206346	11.97021339	4.17E-07	1.51E-05	7.048970236	LAT2;linker for activation of T cells family, member 2	LAT2
1191	3.780971909	2.937626834	11.96227239	4.19E-07	1.52E-05	7.021838475	CLU;clusterin	CLU
11226	-5.813572369	1.274869551	-11.95432791	4.22E-07	1.52E-05	6.91942588	GALNT6;polypeptide N-acetylgalactosaminyltransferase 6	GALNT6
28513	-6.154370432	1.402085775	-11.94754695	4.24E-07	1.53E-05	7.017937323	CDH19;cadherin 19, type 2	CDH19
51094	5.137754822	2.159137928	11.94390778	4.25E-07	1.53E-05	7.025511055	ADIPOR1;adiponectin receptor 1	ADIPOR1
54581	5.431009196	3.175205641	11.92608357	4.31E-07	1.55E-05	7.024457454	SCAND2P;SCAN domain containing 2 pseudogene	SCAND2P
10916	5.130254673	2.717577673	11.91138208	4.36E-07	1.56E-05	6.958832396	MAGED2;melanoma antigen family D, 2	MAGED2
3782	-6.877309248	1.556321024	-11.90802634	4.37E-07	1.57E-05	6.982360356	KCNN3;potassium intermediate/small conductance calcium-activated channel, subfamily N, member 3	KCNN3
171546	5.993118724	1.775907197	11.8717236	4.49E-07	1.60E-05	6.980791717	SPTSSA;serine palmitoyltransferase, small subunit A	SPTSSA
401431	-6.493217046	2.038305716	-11.87168598	4.49E-07	1.60E-05	6.935125697	ATP6V0E2-AS1;ATP6V0E2 antisense RNA 1	ATP6V0E2-AS1
2037	-5.197351215	1.346456483	-11.84503031	4.59E-07	1.63E-05	6.854373021	EPB41L2;erythrocyte membrane protein band 4.1-like 2	EPB41L2
23113	-6.030246823	2.002872927	-11.8437705	4.59E-07	1.63E-05	6.876381885	CUL9;cullin 9	CUL9
94015	-5.740664054	2.553866706	-11.83659138	4.61E-07	1.64E-05	6.883821168	TTYH2;tweety family member 2	TTYH2
11280	-5.956882159	1.284105487	-11.83312717	4.63E-07	1.64E-05	6.839013904	SCN11A;sodium channel, voltage-gated, type XI, alpha subunit	SCN11A
220164	-5.784626249	1.216932094	-11.8299243	4.64E-07	1.64E-05	6.834647297	DOK6;docking protein 6	DOK6
118424	-5.110833308	1.275476785	-11.82947729	4.64E-07	1.64E-05	6.817566676	UBE2J2;ubiquitin-conjugating enzyme E2, J2	UBE2J2
23059	4.361909057	1.21025345	11.81983161	4.67E-07	1.65E-05	6.951266471	CLUAP1;clusterin associated protein 1	CLUAP1
6533	-5.893214654	2.275067932	-11.79949563	4.75E-07	1.67E-05	6.906641555	SLC6A6;solute carrier family 6 (neurotransmitter transporter), member 6	SLC6A6
51332	-6.626141394	2.905604852	-11.76120743	4.89E-07	1.72E-05	6.902236525	SPTBN5;spectrin, beta, non-erythrocytic 5	SPTBN5
5217	7.325756371	3.223712074	11.75902588	4.90E-07	1.72E-05	6.890711979	PFN2;profilin 2	PFN2
262	10.01261787	2.719586238	11.70772828	5.10E-07	1.78E-05	6.805273027	AMD1;adenosylmethionine decarboxylase 1	AMD1
65061	-5.690571668	1.764486675	-11.70650405	5.10E-07	1.78E-05	6.836537172	CDK15;cyclin-dependent kinase 15	CDK15
777	-6.531728893	3.708316877	-11.6743848	5.23E-07	1.82E-05	6.780753804	CACNA1E;calcium channel, voltage-dependent, R type, alpha 1E subunit	CACNA1E
5530	5.105036	4.833508272	11.67018293	5.25E-07	1.82E-05	6.666407675	PPP3CA;protein phosphatase 3, catalytic subunit, alpha isozyme	PPP3CA
92421	5.635374564	2.867413544	11.65059843	5.33E-07	1.84E-05	6.820624536	CHMP4C;charged multivesicular body protein 4C	CHMP4C
60468	-6.032605352	1.689383868	-11.62764155	5.42E-07	1.87E-05	6.740232514	BACH2;BTB and CNC homology 1, basic leucine zipper transcription factor 2	BACH2
1258	-6.032767752	3.638480106	-11.62682987	5.43E-07	1.87E-05	6.727798436	CNGB1;cyclic nucleotide gated channel beta 1	CNGB1
286102	7.47498788	4.311029424	11.62156346	5.45E-07	1.88E-05	6.79004218	TMED10P1;transmembrane emp24-like trafficking protein 10 (yeast) pseudogene 1	TMED10P1
7399	-6.047636236	2.44061	-11.60315	5.53E-07	1.90E-05	6.722901343	USH2A;Usher syndrome 2A (autosomal recessive, mild)	USH2A
3938	-5.760585048	1.311434526	-11.60190988	5.53E-07	1.90E-05	6.657346986	LCT;lactase	LCT
112495	6.948058901	3.442479746	11.58633454	5.60E-07	1.93E-05	6.756766716	GTF3C6;general transcription factor IIIC, polypeptide 6, alpha 35kDa	GTF3C6
84317	5.506877942	3.499154626	11.58014305	5.63E-07	1.93E-05	6.762888442	CCDC115;coiled-coil domain containing 115	CCDC115
5803	-6.530373242	1.592780104	-11.55853915	5.73E-07	1.96E-05	6.735454347	PTPRZ1;protein tyrosine phosphatase, receptor-type, Z polypeptide 1	PTPRZ1
23621	3.773269429	7.224398118	11.5241085	5.88E-07	2.01E-05	6.573363509	BACE1;beta-site APP-cleaving enzyme 1	BACE1
729262	-5.226126068	1.564758038	-11.50849189	5.95E-07	2.03E-05	6.665992975	NUTM2B;NUT family member 2B	NUTM2B
128637	5.075582923	1.077804692	11.50707829	5.96E-07	2.03E-05	6.700549671	TBC1D20;TBC1 domain family, member 20	TBC1D20
4036	-6.872983404	3.182847765	-11.49779331	6.00E-07	2.04E-05	6.70356485	LRP2;low density lipoprotein receptor-related protein 2	LRP2
7589	4.626492343	1.20661138	11.48963163	6.04E-07	2.05E-05	6.658944814	ZSCAN21;zinc finger and SCAN domain containing 21	ZSCAN21
9728	6.571953336	3.32202084	11.48795178	6.05E-07	2.05E-05	6.693377922	SECISBP2L;SECIS binding protein 2-like	SECISBP2L
27034	7.648545065	4.668470132	11.4833662	6.07E-07	2.06E-05	6.69103643	ACAD8;acyl-CoA dehydrogenase family, member 8	ACAD8
79981	-5.601222815	1.171023058	-11.45942702	6.19E-07	2.09E-05	6.583114439	FRMD1;FERM domain containing 1	FRMD1
8562	6.436218927	1.537644925	11.45254262	6.22E-07	2.10E-05	6.618545077	DENR;density-regulated protein	DENR
84823	-4.234694744	1.432202492	-11.44277516	6.27E-07	2.12E-05	6.539474196	LMNB2;lamin B2	LMNB2
5918	3.939164377	0.983126551	11.4358802	6.31E-07	2.13E-05	6.672648724	RARRES1;retinoic acid receptor responder (tazarotene induced) 1	RARRES1
4185	-4.562317529	1.418613661	-11.43291833	6.32E-07	2.13E-05	6.533858663	ADAM11;ADAM metallopeptidase domain 11	ADAM11
4200	5.349741125	3.082286182	11.42696307	6.35E-07	2.14E-05	6.655655857	ME2;malic enzyme 2, NAD(+)-dependent, mitochondrial	ME2
55966	-5.453213112	1.129363807	-11.41394282	6.42E-07	2.16E-05	6.548303922	AJAP1;adherens junctions associated protein 1	AJAP1
479	-6.113277893	2.190550768	-11.40722972	6.45E-07	2.16E-05	6.632669196	ATP12A;ATPase, H+/K+ transporting, nongastric, alpha polypeptide	ATP12A
28988	5.108117487	2.352442313	11.40551953	6.46E-07	2.16E-05	6.638733458	DBNL;drebrin-like	DBNL
58478	5.642212911	1.755407534	11.38512645	6.56E-07	2.19E-05	6.635251944	ENOPH1;enolase-phosphatase 1	ENOPH1
30844	4.652559598	1.443033991	11.38309885	6.57E-07	2.20E-05	6.554419095	EHD4;EH-domain containing 4	EHD4
100507412	-5.843765369	8.418235549	-11.37423683	6.62E-07	2.21E-05	6.617826661	LOC100507412;uncharacterized LOC100507412	LOC100507412
595	6.380199173	3.703316187	11.31180772	6.96E-07	2.31E-05	6.581536852	CCND1;cyclin D1	CCND1
115024	4.475391477	1.302740204	11.29257043	7.07E-07	2.34E-05	6.495256971	NT5C3B;5'-nucleotidase, cytosolic IIIB	NT5C3B
10158	-5.295027996	1.140558876	-11.28562459	7.11E-07	2.35E-05	6.440623825	PDZK1IP1;PDZK1 interacting protein 1	PDZK1IP1
9725	-5.568191523	1.209911589	-11.28045515	7.14E-07	2.36E-05	6.442173357	TMEM63A;transmembrane protein 63A	TMEM63A
57181	5.691208458	3.821959334	11.26315323	7.23E-07	2.38E-05	6.526716297	SLC39A10;solute carrier family 39 (zinc transporter), member 10	SLC39A10
25957	4.531850866	1.256118454	11.2558609	7.28E-07	2.40E-05	6.344426507	PNISR;PNN-interacting serine/arginine-rich protein	PNISR
6667	6.560468307	3.490587201	11.24767369	7.33E-07	2.41E-05	6.522042128	SP1;Sp1 transcription factor	SP1
94241	6.897349765	3.305678296	11.24346443	7.35E-07	2.41E-05	6.520972055	TP53INP1;tumor protein p53 inducible nuclear protein 1	TP53INP1
2893	-5.844620489	1.292969323	-11.24322734	7.35E-07	2.41E-05	6.48645478	GRIA4;glutamate receptor, ionotropic, AMPA 4	GRIA4
1821	-6.605257866	1.672074549	-11.23467469	7.40E-07	2.43E-05	6.501484623	DRP2;dystrophin related protein 2	DRP2
89932	4.294632405	1.996758633	11.23378209	7.41E-07	2.43E-05	6.520348069	PAPLN;papilin, proteoglycan-like sulfated glycoprotein	PAPLN
7767	5.67806728	2.495973808	11.21069656	7.55E-07	2.46E-05	6.504031668	ZNF224;zinc finger protein 224	ZNF224
128977	5.932258827	3.119080574	11.21028179	7.55E-07	2.46E-05	6.499757269	C22orf39;chromosome 22 open reading frame 39	C22orf39
79933	-6.430037941	2.839016464	-11.21000045	7.55E-07	2.46E-05	6.472068592	SYNPO2L;synaptopodin 2-like	SYNPO2L
9341	5.121624674	1.816689313	11.2001229	7.61E-07	2.48E-05	6.49615519	VAMP3;vesicle-associated membrane protein 3	VAMP3
4854	-5.660502519	2.539252809	-11.17660113	7.76E-07	2.52E-05	6.400464503	NOTCH3;notch 3	NOTCH3
9322	5.097779666	2.879540981	11.17596241	7.76E-07	2.52E-05	6.455808902	TRIP10;thyroid hormone receptor interactor 10	TRIP10
5763	5.251325406	2.331060715	11.16865658	7.81E-07	2.53E-05	6.468733455	PTMS;parathymosin	PTMS
4647	-5.130316987	1.456532997	-11.14267749	7.97E-07	2.57E-05	6.407138539	MYO7A;myosin VIIA	MYO7A
100507347	3.015988013	9.629077044	11.12965072	8.06E-07	2.60E-05	6.422927875	VIM-AS1;VIM antisense RNA 1	VIM-AS1
27249	6.022769393	1.214892565	11.12051276	8.12E-07	2.61E-05	6.375029489	MMADHC;methylmalonic aciduria (cobalamin deficiency) cblD type, with homocystinuria	MMADHC
4324	-5.874721297	2.059304908	-11.08782581	8.33E-07	2.67E-05	6.37769327	MMP15;matrix metallopeptidase 15 (membrane-inserted)	MMP15
6579	-5.358792365	1.105761556	-11.08470035	8.36E-07	2.68E-05	6.307914829	SLCO1A2;solute carrier organic anion transporter family, member 1A2	SLCO1A2
4669	-5.651648744	2.494884675	-11.07624112	8.41E-07	2.69E-05	6.347246213	NAGLU;N-acetylglucosaminidase, alpha	NAGLU
1183	-5.87765949	1.881824807	-11.07450789	8.43E-07	2.70E-05	6.219680745	CLCN4;chloride channel, voltage-sensitive 4	CLCN4
84292	3.844188997	9.539022719	11.07342037	8.43E-07	2.70E-05	6.372512537	WDR83;WD repeat domain 83	WDR83
7450	-7.085475246	3.230191372	-11.04407677	8.64E-07	2.75E-05	6.364994305	VWF;von Willebrand factor	VWF
51309	5.466358073	1.494738251	11.04063567	8.66E-07	2.76E-05	6.315661194	ARMCX1;armadillo repeat containing, X-linked 1	ARMCX1
100129034	2.898665545	8.567555031	11.03192883	8.72E-07	2.77E-05	6.357791302	LOC100129034;uncharacterized LOC100129034	LOC100129034
5721	5.802768627	2.843270221	11.02504508	8.77E-07	2.79E-05	6.346571011	PSME2;proteasome (prosome, macropain) activator subunit 2 (PA28 beta)	PSME2
11096	-5.348362439	1.124786041	-11.00818119	8.89E-07	2.82E-05	6.258529904	ADAMTS5;ADAM metallopeptidase with thrombospondin type 1 motif, 5	ADAMTS5
64781	-5.424895261	1.176493566	-10.98876206	9.04E-07	2.85E-05	6.238165948	CERK;ceramide kinase	CERK
23255	-6.00738071	1.356605418	-10.9880503	9.04E-07	2.85E-05	6.242672086	MTCL1;microtubule crosslinking factor 1	MTCL1
84865	3.882322959	1.890564768	10.98679454	9.05E-07	2.85E-05	6.311412269	CCDC142;coiled-coil domain containing 142	CCDC142
1759	-5.46361503	1.170724044	-10.97706818	9.12E-07	2.88E-05	6.224441468	DNM1;dynamin 1	DNM1
10071	-6.086354031	2.868340165	-10.9537536	9.30E-07	2.93E-05	6.26529399	MUC12;mucin 12, cell surface associated	MUC12
5714	4.712185306	0.782591436	10.9395426	9.41E-07	2.96E-05	6.234986063	PSMD8;proteasome (prosome, macropain) 26S subunit, non-ATPase, 8	PSMD8
84443	-6.334592882	1.388944955	-10.91166237	9.63E-07	3.02E-05	6.253100414	FRMPD3;FERM and PDZ domain containing 3	FRMPD3
2051	-6.040603622	2.634417767	-10.89194652	9.78E-07	3.07E-05	6.246442085	EPHB6;EPH receptor B6	EPHB6
6171	4.685645419	1.371820769	10.87117524	9.95E-07	3.11E-05	6.062877571	RPL41;ribosomal protein L41	RPL41
10169	6.281715236	3.332985837	10.86073504	1.00E-06	3.13E-05	6.22329391	SERF2;small EDRK-rich factor 2	SERF2
1892	3.595991935	2.088756511	10.85660669	1.01E-06	3.14E-05	6.212934652	ECHS1;enoyl CoA hydratase, short chain, 1, mitochondrial	ECHS1
375033	-5.636820396	1.227991442	-10.84888986	1.01E-06	3.15E-05	6.138956132	PEAR1;platelet endothelial aggregation receptor 1	PEAR1
653483	5.540246466	2.743022314	10.82031366	1.04E-06	3.23E-05	6.192186831	MLLT4-AS1;MLLT4 antisense RNA 1 (head to head)	MLLT4-AS1
4714	3.757720842	1.831413014	10.81495817	1.04E-06	3.24E-05	6.065808967	NDUFB8;NADH dehydrogenase (ubiquinone) 1 beta subcomplex, 8, 19kDa	NDUFB8
84251	-6.402750271	1.455687044	-10.80671833	1.05E-06	3.26E-05	6.172061073	SGIP1;SH3-domain GRB2-like (endophilin) interacting protein 1	SGIP1
27341	5.380142693	3.463095923	10.8033226	1.05E-06	3.26E-05	6.17712794	RRP7A;ribosomal RNA processing 7 homolog A (S. cerevisiae)	RRP7A
55915	4.323638904	2.721333149	10.80225711	1.05E-06	3.26E-05	6.177643692	LANCL2;LanC lantibiotic synthetase component C-like 2 (bacterial)	LANCL2
116236	-5.035495467	1.252760907	-10.79506854	1.06E-06	3.28E-05	6.082881679	ABHD15;abhydrolase domain containing 15	ABHD15
84624	-6.418834715	1.391808656	-10.78708084	1.07E-06	3.30E-05	6.157848569	FNDC1;fibronectin type III domain containing 1	FNDC1
374955	-6.26095184	1.294332702	-10.77992436	1.07E-06	3.32E-05	6.148447133	SPATA21;spermatogenesis associated 21	SPATA21
158763	-4.709645437	0.889067592	-10.77617988	1.08E-06	3.32E-05	6.146915494	ARHGAP36;Rho GTPase activating protein 36	ARHGAP36
100506033	6.938354623	4.286606968	10.76296376	1.09E-06	3.35E-05	6.14677227	PTOV1-AS1;PTOV1 antisense RNA 1	PTOV1-AS1
2512	4.956356229	2.401651809	10.75913835	1.09E-06	3.36E-05	6.13398776	FTL;ferritin, light polypeptide	FTL
7442	-5.924330218	1.456141549	-10.757074	1.09E-06	3.36E-05	6.103924953	TRPV1;transient receptor potential cation channel, subfamily V, member 1	TRPV1
10399	8.013981697	1.999993111	10.75596541	1.10E-06	3.36E-05	6.100680189	GNB2L1;guanine nucleotide binding protein (G protein), beta polypeptide 2-like 1	GNB2L1
4308	-5.298090325	1.594919635	-10.74284368	1.11E-06	3.39E-05	5.97896678	TRPM1;transient receptor potential cation channel, subfamily M, member 1	TRPM1
55178	4.956580182	1.91938495	10.74131486	1.11E-06	3.39E-05	6.136103135	RNMTL1;RNA methyltransferase like 1	RNMTL1
8448	5.229154175	1.775074455	10.74031041	1.11E-06	3.39E-05	6.10511838	DOC2A;double C2-like domains, alpha	DOC2A
54758	3.954661363	0.523884875	10.7316581	1.12E-06	3.41E-05	6.096960741	KLHDC4;kelch domain containing 4	KLHDC4
100507495	5.053632875	1.611678372	10.72934124	1.12E-06	3.42E-05	6.12646225	SDCBP2-AS1;SDCBP2 antisense RNA 1	SDCBP2-AS1
6647	8.02787175	1.957435118	10.72047518	1.13E-06	3.44E-05	6.074167467	SOD1;superoxide dismutase 1, soluble	SOD1
94	-5.314440075	1.14624778	-10.71739033	1.13E-06	3.45E-05	6.033247398	ACVRL1;activin A receptor type II-like 1	ACVRL1
50939	-6.569781178	1.441402039	-10.70294388	1.14E-06	3.49E-05	6.091069256	IMPG2;interphotoreceptor matrix proteoglycan 2	IMPG2
6218	6.330430852	1.304364387	10.6495247	1.20E-06	3.63E-05	6.019404595	RPS17;ribosomal protein S17	RPS17
90665	4.255318584	0.62585577	10.6419629	1.21E-06	3.64E-05	6.028811125	TBL1Y;transducin (beta)-like 1, Y-linked	TBL1Y
4149	6.639208021	3.140355078	10.62885974	1.22E-06	3.68E-05	6.045171757	MAX;MYC associated factor X	MAX
51276	5.290559287	3.251170167	10.62548956	1.22E-06	3.69E-05	6.029947185	ZNF571;zinc finger protein 571	ZNF571
9758	-6.530820909	1.535846498	-10.60618872	1.24E-06	3.74E-05	5.955853346	FRMPD4;FERM and PDZ domain containing 4	FRMPD4
340307	3.350774147	0.478454361	10.59928339	1.25E-06	3.76E-05	5.975740605	CTAGE6;CTAGE family, member 6	CTAGE6
157285	-5.110841853	1.025146061	-10.5940176	1.25E-06	3.77E-05	5.946623353	SGK223;homolog of rat pragma of Rnd2	SGK223
7386	6.401050495	1.354744976	10.58887069	1.26E-06	3.78E-05	5.971746533	UQCRFS1;ubiquinol-cytochrome c reductase, Rieske iron-sulfur polypeptide 1	UQCRFS1
51126	5.845889791	3.451312261	10.56528955	1.29E-06	3.84E-05	5.98425058	NAA20;N(alpha)-acetyltransferase 20, NatB catalytic subunit	NAA20
5001	-5.081021546	0.999211853	-10.55092241	1.30E-06	3.88E-05	5.912077094	ORC5;origin recognition complex, subunit 5	ORC5
23545	-5.706177569	2.590750949	-10.52914939	1.33E-06	3.94E-05	5.949593031	ATP6V0A2;ATPase, H+ transporting, lysosomal V0 subunit a2	ATP6V0A2
494514	4.796083271	3.008999007	10.51912405	1.34E-06	3.97E-05	5.954039324	TYMSOS;TYMS opposite strand	TYMSOS
57175	4.180223902	2.414686863	10.51568713	1.34E-06	3.97E-05	5.932664967	CORO1B;coronin, actin binding protein, 1B	CORO1B
5744	-5.328013225	1.075669098	-10.51236406	1.34E-06	3.98E-05	5.931197769	PTHLH;parathyroid hormone-like hormone	PTHLH
23039	5.5945593	2.977222675	10.50395275	1.35E-06	4.01E-05	5.930674618	XPO7;exportin 7	XPO7
8835	6.318091241	4.625839391	10.49323755	1.37E-06	4.03E-05	5.921001596	SOCS2;suppressor of cytokine signaling 2	SOCS2
9699	4.69238606	1.713756664	10.47905299	1.38E-06	4.08E-05	5.922072272	RIMS2;regulating synaptic membrane exocytosis 2	RIMS2
3856	3.363423109	10.75117767	10.46337121	1.40E-06	4.12E-05	5.892664388	KRT8;keratin 8	KRT8
57168	4.436602509	2.476093566	10.45225114	1.42E-06	4.15E-05	5.898592144	ASPHD2;aspartate beta-hydroxylase domain containing 2	ASPHD2
11044	-5.392581593	1.102363152	-10.44795721	1.42E-06	4.16E-05	5.831248818	PAPD7;PAP associated domain containing 7	PAPD7
6769	-5.168072366	1.344480195	-10.41784606	1.46E-06	4.27E-05	5.78254137	STAC;SH3 and cysteine rich domain	STAC
51185	6.690408815	3.721531245	10.41197697	1.47E-06	4.28E-05	5.85772564	CRBN;cereblon	CRBN
26051	-5.564235447	1.097373196	-10.41012442	1.47E-06	4.29E-05	5.855258342	PPP1R16B;protein phosphatase 1, regulatory subunit 16B	PPP1R16B
414152	-5.268588281	2.111637745	-10.40226571	1.48E-06	4.30E-05	5.841920553	C10orf105;chromosome 10 open reading frame 105	C10orf105
10618	4.195847386	2.093961029	10.40213992	1.48E-06	4.30E-05	5.839779231	TGOLN2;trans-golgi network protein 2	TGOLN2
5432	5.049692809	2.232119318	10.40153072	1.48E-06	4.30E-05	5.8568999	POLR2C;polymerase (RNA) II (DNA directed) polypeptide C, 33kDa	POLR2C
9214	-5.258809795	1.118692752	-10.38217671	1.50E-06	4.37E-05	5.783292565	FAIM3;Fas apoptotic inhibitory molecule 3	FAIM3
101752399	4.680817474	0.730814197	10.35924706	1.53E-06	4.45E-05	5.807654168	STAG3L5P-PVRIG2P-PILRB;STAG3L5P-PVRIG2P-PILRB readthrough	STAG3L5P-PVRIG2P-PILRB
23258	-5.186494414	3.881995527	-10.35025305	1.54E-06	4.48E-05	5.807113885	DENND5A;DENN/MADD domain containing 5A	DENND5A
3687	-6.467443071	1.436502487	-10.34194211	1.56E-06	4.50E-05	5.798860058	ITGAX;integrin, alpha X (complement component 3 receptor 4 subunit)	ITGAX
84124	3.364164405	1.859140944	10.34163022	1.56E-06	4.50E-05	5.784807886	ZNF394;zinc finger protein 394	ZNF394
9146	5.103671121	3.090443644	10.33255781	1.57E-06	4.53E-05	5.801294925	HGS;hepatocyte growth factor-regulated tyrosine kinase substrate	HGS
10390	5.868978452	3.358152038	10.32817118	1.57E-06	4.54E-05	5.791750565	CEPT1;choline/ethanolamine phosphotransferase 1	CEPT1
55362	2.993292637	6.720072242	10.31046826	1.60E-06	4.60E-05	5.639140105	TMEM63B;transmembrane protein 63B	TMEM63B
55054	4.775098993	2.327285658	10.3047649	1.61E-06	4.62E-05	5.775957932	ATG16L1;autophagy related 16-like 1 (S. cerevisiae)	ATG16L1
51008	3.362560984	7.50972603	10.30334348	1.61E-06	4.62E-05	5.764661224	ASCC1;activating signal cointegrator 1 complex subunit 1	ASCC1
57507	-5.446791438	2.652218092	-10.30059044	1.61E-06	4.62E-05	5.730058644	ZNF608;zinc finger protein 608	ZNF608
1398	6.735989407	1.421363558	10.29254233	1.62E-06	4.65E-05	5.738208202	CRK;v-crk avian sarcoma virus CT10 oncogene homolog	CRK
254225	4.886900437	5.725245865	10.28890485	1.63E-06	4.66E-05	5.715497484	RNF169;ring finger protein 169	RNF169
54796	-4.822552733	2.874237336	-10.28161896	1.64E-06	4.68E-05	5.734553198	BNC2;basonuclin 2	BNC2
84318	5.448095453	3.176540135	10.27780874	1.64E-06	4.69E-05	5.753470255	CCDC77;coiled-coil domain containing 77	CCDC77
84293	5.825853543	2.046566935	10.26043803	1.67E-06	4.76E-05	5.699339814	FAM213A;family with sequence similarity 213, member A	FAM213A
5901	4.649471668	0.772566917	10.23031635	1.71E-06	4.87E-05	5.681669506	RAN;RAN, member RAS oncogene family	RAN
1267	4.433989172	1.717582184	10.22606272	1.72E-06	4.88E-05	5.676556578	CNP;2',3'-cyclic nucleotide 3' phosphodiesterase	CNP
284865	-5.262864949	1.121541555	-10.22463983	1.72E-06	4.89E-05	5.648263854	LOC284865;uncharacterized LOC284865	LOC284865
201625	-6.322034029	1.775972098	-10.21982632	1.73E-06	4.90E-05	5.671823211	DNAH12;dynein, axonemal, heavy chain 12	DNAH12
114827	3.747505036	3.320393434	10.21624928	1.74E-06	4.91E-05	5.697885881	FHAD1;forkhead-associated (FHA) phosphopeptide binding domain 1	FHAD1
245711	4.780066789	1.287653203	10.21535334	1.74E-06	4.91E-05	5.681913533	SPDYA;speedy/RINGO cell cycle regulator family member A	SPDYA
51669	5.063915073	1.134571154	10.18642753	1.78E-06	5.02E-05	5.633588589	SARAF;store-operated calcium entry-associated regulatory factor	SARAF
84747	5.91695358	1.808582908	10.18284887	1.79E-06	5.03E-05	5.643055444	UNC119B;unc-119 homolog B (C. elegans)	UNC119B
10726	4.773272409	2.376131315	10.17216926	1.80E-06	5.07E-05	5.663790574	NUDC;nudC nuclear distribution protein	NUDC
23030	4.481610181	1.712367079	10.16686588	1.81E-06	5.09E-05	5.661451033	KDM4B;lysine (K)-specific demethylase 4B	KDM4B
6636	5.635407207	2.241314854	10.15311742	1.83E-06	5.15E-05	5.602194	SNRPF;small nuclear ribonucleoprotein polypeptide F	SNRPF
1767	-3.774379197	5.263592946	-10.13412198	1.86E-06	5.23E-05	5.626446971	DNAH5;dynein, axonemal, heavy chain 5	DNAH5
54946	-5.53188541	1.196047226	-10.13252317	1.87E-06	5.23E-05	5.59812872	SLC41A3;solute carrier family 41, member 3	SLC41A3
51611	5.435143843	1.802912861	10.12360215	1.88E-06	5.26E-05	5.624575681	DPH5;diphthamide biosynthesis 5	DPH5
79887	5.323568965	3.305660786	10.12229395	1.88E-06	5.26E-05	5.618046252	PLBD1;phospholipase B domain containing 1	PLBD1
10476	3.608075294	1.589579199	10.11585792	1.89E-06	5.29E-05	5.6112126	ATP5H;ATP synthase, H+ transporting, mitochondrial Fo complex, subunit d	ATP5H
55435	5.314942767	2.47925584	10.10580195	1.91E-06	5.33E-05	5.609430944	AP1AR;adaptor-related protein complex 1 associated regulatory protein	AP1AR
55662	5.063724195	2.865136054	10.08392924	1.95E-06	5.41E-05	5.586965181	HIF1AN;hypoxia inducible factor 1, alpha subunit inhibitor	HIF1AN
2987	3.481931351	1.370697101	10.07416877	1.97E-06	5.45E-05	5.552019759	GUK1;guanylate kinase 1	GUK1
1261	-5.122755163	1.012243632	-10.05763441	1.99E-06	5.53E-05	5.520323862	CNGA3;cyclic nucleotide gated channel alpha 3	CNGA3
7517	-5.089396759	1.604225977	-10.05476076	2.00E-06	5.54E-05	5.423248199	XRCC3;X-ray repair complementing defective repair in Chinese hamster cells 3	XRCC3
4779	-5.564909084	2.582564882	-10.03900013	2.03E-06	5.60E-05	5.534178711	NFE2L1;nuclear factor, erythroid 2-like 1	NFE2L1
26088	3.612040247	2.004156583	10.0376635	2.03E-06	5.61E-05	5.541382189	GGA1;golgi-associated, gamma adaptin ear containing, ARF binding protein 1	GGA1
9528	2.619497739	0.890297635	10.02548171	2.05E-06	5.66E-05	5.474505486	TMEM59;transmembrane protein 59	TMEM59
56978	5.468818264	3.295415199	10.00087424	2.10E-06	5.77E-05	5.518110599	PRDM8;PR domain containing 8	PRDM8
10243	3.768704078	2.527412944	9.991912911	2.11E-06	5.81E-05	5.50745919	GPHN;gephyrin	GPHN
51312	5.25395952	3.257314299	9.965879549	2.16E-06	5.92E-05	5.482045464	SLC25A37;solute carrier family 25 (mitochondrial iron transporter), member 37	SLC25A37
79587	5.323892536	1.664511299	9.963031814	2.17E-06	5.93E-05	5.462453398	CARS2;cysteinyl-tRNA synthetase 2, mitochondrial (putative)	CARS2
7727	-5.582678665	1.212088408	-9.960166654	2.17E-06	5.94E-05	5.458069084	ZNF174;zinc finger protein 174	ZNF174
619279	5.426556837	4.267267743	9.943162919	2.21E-06	6.01E-05	5.439881385	ZNF704;zinc finger protein 704	ZNF704
66037	-4.892616619	1.145306159	-9.942900984	2.21E-06	6.01E-05	5.462631719	BOLL;boule-like RNA-binding protein	BOLL
22820	6.333825439	3.508498564	9.926427552	2.24E-06	6.08E-05	5.449951291	COPG1;coatomer protein complex, subunit gamma 1	COPG1
27069	4.463930325	3.235563911	9.912575844	2.27E-06	6.15E-05	5.435901489	GHITM;growth hormone inducible transmembrane protein	GHITM
642446	-4.103634831	1.360795009	-9.896024732	2.30E-06	6.23E-05	5.398010167	TRIM64B;tripartite motif containing 64B	TRIM64B
284111	-4.691095887	1.438955602	-9.886446583	2.32E-06	6.28E-05	5.378014706	SLC13A5;solute carrier family 13 (sodium-dependent citrate transporter), member 5	SLC13A5
83992	-4.340951334	1.287033149	-9.885088389	2.32E-06	6.28E-05	5.353721055	CTTNBP2;cortactin binding protein 2	CTTNBP2
55101	3.886498583	1.45419469	9.875996428	2.34E-06	6.32E-05	5.409465906	ATP5SL;ATP5S-like	ATP5SL
6332	-4.595968166	1.573487615	-9.873623617	2.35E-06	6.33E-05	5.367212896	SCN7A;sodium channel, voltage-gated, type VII, alpha subunit	SCN7A
3697	-5.221024557	1.10134333	-9.869633192	2.36E-06	6.34E-05	5.366010302	ITIH1;inter-alpha-trypsin inhibitor heavy chain 1	ITIH1
114815	-6.123159494	1.329570412	-9.815396312	2.48E-06	6.63E-05	5.352820005	SORCS1;sortilin-related VPS10 domain containing receptor 1	SORCS1
79441	5.252885206	1.492834038	9.804921356	2.50E-06	6.68E-05	5.328904027	HAUS3;HAUS augmin-like complex, subunit 3	HAUS3
284418	-4.437480501	1.543342456	-9.804673667	2.50E-06	6.68E-05	5.275374332	FAM71E2;family with sequence similarity 71, member E2	FAM71E2
8073	6.061970905	3.671264744	9.799804095	2.51E-06	6.71E-05	5.342450677	PTP4A2;protein tyrosine phosphatase type IVA, member 2	PTP4A2
4154	3.300204044	4.385590962	9.791555204	2.53E-06	6.75E-05	5.268528769	MBNL1;muscleblind-like splicing regulator 1	MBNL1
8646	-4.640597633	0.945844571	-9.786850167	2.54E-06	6.77E-05	5.2955483	CHRD;chordin	CHRD
116138	4.698635822	2.160373325	9.776874389	2.56E-06	6.82E-05	5.275079596	KLHDC3;kelch domain containing 3	KLHDC3
9162	-5.356640592	1.664858202	-9.768685237	2.58E-06	6.86E-05	5.250340534	DGKI;diacylglycerol kinase, iota	DGKI
89927	-4.233762557	1.824966283	-9.768339513	2.58E-06	6.86E-05	5.313450131	C16orf45;chromosome 16 open reading frame 45	C16orf45
79987	-5.713947237	1.73589136	-9.750446952	2.62E-06	6.96E-05	5.222630381	SVEP1;sushi, von Willebrand factor type A, EGF and pentraxin domain containing 1	SVEP1
280664	3.106949294	0.984872183	9.743419867	2.64E-06	7.00E-05	5.293294815	WFDC10B;WAP four-disulfide core domain 10B	WFDC10B
401565	3.801512491	8.627823419	9.735185078	2.66E-06	7.05E-05	5.285853318	FAM166A;family with sequence similarity 166, member A	FAM166A
1794	-5.307951094	1.173151302	-9.716133897	2.71E-06	7.16E-05	5.230764326	DOCK2;dedicator of cytokinesis 2	DOCK2
9744	5.584835345	3.015874944	9.708397671	2.73E-06	7.20E-05	5.262252356	ACAP1;ArfGAP with coiled-coil, ankyrin repeat and PH domains 1	ACAP1
29927	4.333018442	1.687563542	9.705738058	2.73E-06	7.21E-05	5.231194076	SEC61A1;Sec61 alpha 1 subunit (S. cerevisiae)	SEC61A1
22932	3.51087173	0.310299359	9.700501203	2.75E-06	7.24E-05	5.247574312	POMZP3;POM121 and ZP3 fusion	POMZP3
8490	-4.770177894	0.97119806	-9.691100343	2.77E-06	7.30E-05	5.209474973	RGS5;regulator of G-protein signaling 5	RGS5
1063	-5.890596371	1.305986725	-9.680128556	2.80E-06	7.36E-05	5.231214199	CENPF;centromere protein F, 350/400kDa	CENPF
4601	2.720692023	0.843167561	9.662429763	2.84E-06	7.47E-05	5.216158992	MXI1;MAX interactor 1, dimerization protein	MXI1
55107	-4.836476898	1.14840273	-9.652460745	2.87E-06	7.52E-05	5.189220774	ANO1;anoctamin 1, calcium activated chloride channel	ANO1
129303	3.439970591	0.908161981	9.648923949	2.88E-06	7.54E-05	5.201085756	TMEM150A;transmembrane protein 150A	TMEM150A
8682	6.320239876	2.246250438	9.632676733	2.92E-06	7.64E-05	5.181513345	PEA15;phosphoprotein enriched in astrocytes 15	PEA15
114788	-6.137385667	2.156705831	-9.631449877	2.93E-06	7.65E-05	5.191512699	CSMD3;CUB and Sushi multiple domains 3	CSMD3
7045	-5.237378479	1.233567829	-9.62770599	2.94E-06	7.66E-05	5.186943037	TGFBI;transforming growth factor, beta-induced, 68kDa	TGFBI
5224	4.802640913	1.562613453	9.587513905	3.05E-06	7.93E-05	5.149552396	PGAM2;phosphoglycerate mutase 2 (muscle)	PGAM2
124093	3.871296976	0.620346648	9.57699204	3.08E-06	8.00E-05	5.13803114	CCDC78;coiled-coil domain containing 78	CCDC78
131831	5.659593835	3.280226774	9.57607149	3.08E-06	8.00E-05	5.141064006	ERICH6;glutamate-rich 6	ERICH6
219899	4.632576192	2.304601817	9.559133736	3.13E-06	8.10E-05	5.127784722	TBCEL;tubulin folding cofactor E-like	TBCEL
6271	4.770643882	1.906654755	9.558955785	3.13E-06	8.10E-05	5.128115478	S100A1;S100 calcium binding protein A1	S100A1
100506540	7.683063662	5.326573897	9.536709161	3.19E-06	8.26E-05	5.107062615	SPTY2D1-AS1;SPTY2D1 antisense RNA 1	SPTY2D1-AS1
10422	-5.210060963	1.050240098	-9.527288858	3.22E-06	8.31E-05	5.069328402	UBAC1;UBA domain containing 1	UBAC1
6720	-5.003863978	3.251890232	-9.507123676	3.28E-06	8.46E-05	5.074380805	SREBF1;sterol regulatory element binding transcription factor 1	SREBF1
26502	5.06786001	1.537839484	9.500659712	3.30E-06	8.50E-05	5.072227447	NARF;nuclear prelamin A recognition factor	NARF
101927233	3.840224303	0.610707503	9.486180156	3.34E-06	8.59E-05	5.056746922	CTB-118N6.3;uncharacterized LOC101927233	CTB-118N6.3
54492	-4.922207403	1.540767606	-9.485729225	3.35E-06	8.59E-05	4.984988984	NEURL1B;neuralized E3 ubiquitin protein ligase 1B	NEURL1B
348180	-5.236436262	1.090148022	-9.482601456	3.36E-06	8.61E-05	5.032742391	CTU2;cytosolic thiouridylase subunit 2 homolog (S. pombe)	CTU2
285613	5.397999083	3.516575641	9.481550804	3.36E-06	8.62E-05	5.057901846	RELL2;RELT-like 2	RELL2
5092	6.041852475	1.403890078	9.477630413	3.37E-06	8.64E-05	5.04566568	PCBD1;pterin-4 alpha-carbinolamine dehydratase/dimerization cofactor of hepatocyte nuclear factor 1 alpha	PCBD1
23609	6.22401694	3.911295488	9.47736796	3.37E-06	8.64E-05	5.054091489	MKRN2;makorin ring finger protein 2	MKRN2
6191	8.986990981	3.297281671	9.459658505	3.43E-06	8.77E-05	5.030304707	RPS4X;ribosomal protein S4, X-linked	RPS4X
4943	-5.536449591	1.985232703	-9.458761217	3.43E-06	8.77E-05	5.036571884	TBC1D25;TBC1 domain family, member 25	TBC1D25
3416	3.727795886	1.553499123	9.45750394	3.43E-06	8.77E-05	5.034438029	IDE;insulin-degrading enzyme	IDE
11184	-4.718686637	0.911190358	-9.446608764	3.47E-06	8.85E-05	4.997888901	MAP4K1;mitogen-activated protein kinase kinase kinase kinase 1	MAP4K1
162514	-5.332812495	1.584102461	-9.433262493	3.51E-06	8.95E-05	4.957032117	TRPV3;transient receptor potential cation channel, subfamily V, member 3	TRPV3
55643	4.103247544	1.70724735	9.415228115	3.57E-06	9.08E-05	4.997535104	BTBD2;BTB (POZ) domain containing 2	BTBD2
91355	-5.190064045	1.857924478	-9.409253312	3.59E-06	9.12E-05	4.966843857	LRP5L;low density lipoprotein receptor-related protein 5-like	LRP5L
27342	2.128628474	8.684073723	9.405558218	3.60E-06	9.14E-05	4.966041813	RABGEF1;RAB guanine nucleotide exchange factor (GEF) 1	RABGEF1
284618	4.623579799	1.492287672	9.404194328	3.61E-06	9.15E-05	4.98468381	RUSC1-AS1;RUSC1 antisense RNA 1	RUSC1-AS1
56999	-6.515918358	1.436595483	-9.395986362	3.64E-06	9.20E-05	4.979568047	ADAMTS9;ADAM metallopeptidase with thrombospondin type 1 motif, 9	ADAMTS9
63982	-6.412124636	1.403735199	-9.380678096	3.69E-06	9.33E-05	4.965627674	ANO3;anoctamin 3	ANO3
6130	7.090820667	4.541917345	9.368464046	3.73E-06	9.42E-05	4.954563395	RPL7A;ribosomal protein L7a	RPL7A
7549	6.524214571	4.109462295	9.344011037	3.82E-06	9.62E-05	4.931593986	ZNF2;zinc finger protein 2	ZNF2
203238	-5.263359456	1.198314649	-9.331474422	3.86E-06	9.72E-05	4.900716464	CCDC171;coiled-coil domain containing 171	CCDC171
130576	-4.72076419	0.931531517	-9.321777264	3.90E-06	9.80E-05	4.889419981	LYPD6B;LY6/PLAUR domain containing 6B	LYPD6B
79730	5.390874119	2.992939091	9.319576658	3.91E-06	9.81E-05	4.909760988	NSUN7;NOP2/Sun domain family, member 7	NSUN7
56259	4.6106355	1.392614412	9.306201682	3.96E-06	9.92E-05	4.889680488	CTNNBL1;catenin, beta like 1	CTNNBL1
81553	5.128527082	1.742308093	9.297392421	3.99E-06	9.99E-05	4.882775227	FAM49A;family with sequence similarity 49, member A	FAM49A
8402	5.794241869	2.535676056	9.281276238	4.05E-06	0.000101085	4.873420226	SLC25A11;solute carrier family 25 (mitochondrial carrier; oxoglutarate carrier), member 11	SLC25A11
3594	-4.918772087	1.487912695	-9.267852178	4.10E-06	0.000102253	4.806946211	IL12RB1;interleukin 12 receptor, beta 1	IL12RB1
162333	3.731744045	2.150410508	9.264899186	4.11E-06	0.000102478	4.817037159	MARCH10;membrane-associated ring finger (C3HC4) 10, E3 ubiquitin protein ligase	10-Mar
7544	3.323610135	1.616309985	9.260813413	4.13E-06	0.000102691	4.844333363	ZFY;zinc finger protein, Y-linked	ZFY
55680	3.616908617	4.539939339	9.251420959	4.17E-06	0.000103484	4.823698547	RUFY2;RUN and FYVE domain containing 2	RUFY2
199692	4.05504988	2.463079582	9.24012397	4.21E-06	0.000104535	4.833334795	ZNF627;zinc finger protein 627	ZNF627
10912	3.997591981	0.483925366	9.234092956	4.24E-06	0.000105072	4.830034196	GADD45G;growth arrest and DNA-damage-inducible, gamma	GADD45G
81493	5.65949082	7.00131103	9.224196038	4.28E-06	0.000105937	4.820514836	SYNC;syncoilin, intermediate filament protein	SYNC
11180	5.553619914	4.438651248	9.216138758	4.31E-06	0.000106687	4.81340889	WDR6;WD repeat domain 6	WDR6
51119	7.269926151	1.873985512	9.206872139	4.35E-06	0.000107439	4.8027702	SBDS;Shwachman-Bodian-Diamond syndrome	SBDS
509	5.199587382	1.800336842	9.20592805	4.35E-06	0.000107472	4.797700806	ATP5C1;ATP synthase, H+ transporting, mitochondrial F1 complex, gamma polypeptide 1	ATP5C1
145873	5.030676279	1.179899809	9.201383448	4.37E-06	0.000107746	4.796962626	MESP2;mesoderm posterior basic helix-loop-helix transcription factor 2	MESP2
131544	4.092580511	6.819847331	9.197719284	4.38E-06	0.000108059	4.762081217	CRYBG3;beta-gamma crystallin domain containing 3	CRYBG3
1734	-4.451189036	0.767784343	-9.192934039	4.40E-06	0.000108488	4.778130789	DIO2;deiodinase, iodothyronine, type II	DIO2
3675	-5.62812827	2.120819528	-9.183183275	4.45E-06	0.00010937	4.783395441	ITGA3;integrin, alpha 3 (antigen CD49C, alpha 3 subunit of VLA-3 receptor)	ITGA3
9552	4.484837367	1.185061392	9.168495858	4.51E-06	0.000110651	4.767333976	SPAG7;sperm associated antigen 7	SPAG7
441518	5.819025806	3.509778067	9.164895739	4.52E-06	0.000110967	4.764651152	FAM127C;family with sequence similarity 127, member C	FAM127C
84231	3.930993258	1.914567218	9.16265492	4.53E-06	0.000111074	4.764093084	TRAF7;TNF receptor-associated factor 7, E3 ubiquitin protein ligase	TRAF7
127253	5.706334177	1.797973765	9.138558592	4.64E-06	0.000113327	4.737867102	TYW3;tRNA-yW synthesizing protein 3 homolog (S. cerevisiae)	TYW3
80243	-6.33748348	1.392717633	-9.136325993	4.65E-06	0.000113503	4.739632037	PREX2;phosphatidylinositol-3,4,5-trisphosphate-dependent Rac exchange factor 2	PREX2
6143	6.876304736	2.029272809	9.131668236	4.67E-06	0.000113943	4.731534767	RPL19;ribosomal protein L19	RPL19
84460	-5.081119612	1.077038824	-9.123362578	4.71E-06	0.000114718	4.71139606	ZMAT1;zinc finger, matrin-type 1	ZMAT1
367	3.624259244	5.195856477	9.119240351	4.73E-06	0.000115038	4.702758739	AR;androgen receptor	AR
221391	-5.704185891	1.234124706	-9.110215583	4.77E-06	0.000115902	4.703114488	OPN5;opsin 5	OPN5
3185	3.076329989	4.265924707	9.103096121	4.80E-06	0.000116628	4.707866355	HNRNPF;heterogeneous nuclear ribonucleoprotein F	HNRNPF
54749	4.345753521	1.260992401	9.092867987	4.85E-06	0.000117505	4.694402744	EPDR1;ependymin related 1	EPDR1
221711	-4.508210854	2.120315353	-9.088298278	4.87E-06	0.000117953	4.669457533	SYCP2L;synaptonemal complex protein 2-like	SYCP2L
7334	6.521929165	3.422607585	9.077108545	4.92E-06	0.000119159	4.682710519	UBE2N;ubiquitin-conjugating enzyme E2N	UBE2N
10434	5.572459398	3.07216918	9.07386371	4.94E-06	0.000119393	4.679341333	LYPLA1;lysophospholipase I	LYPLA1
158293	4.511153436	7.259443595	9.063741865	4.98E-06	0.000120352	4.611769536	FAM120AOS;family with sequence similarity 120A opposite strand	FAM120AOS
29887	-5.211422578	1.27227205	-9.057872996	5.01E-06	0.000120964	4.660384649	SNX10;sorting nexin 10	SNX10
400728	5.075540868	2.954008247	9.048697442	5.06E-06	0.000121897	4.654566979	FAM87B;family with sequence similarity 87, member B	FAM87B
643155	6.485414587	1.412361041	9.047942738	5.06E-06	0.000121915	4.654651763	SMIM15;small integral membrane protein 15	SMIM15
9223	5.552134607	3.437192808	9.02713141	5.16E-06	0.000124244	4.636209139	MAGI1;membrane associated guanylate kinase, WW and PDZ domain containing 1	MAGI1
55012	4.458386681	3.360869002	9.020823045	5.19E-06	0.000124899	4.624758719	PPP2R3C;protein phosphatase 2, regulatory subunit B'', gamma	PPP2R3C
57120	5.283515744	2.966968898	9.020089674	5.20E-06	0.000124899	4.624586174	GOPC;golgi-associated PDZ and coiled-coil motif containing	GOPC
644815	-5.334480854	1.08055353	-9.019496319	5.20E-06	0.000124899	4.619544443	FAM83G;family with sequence similarity 83, member G	FAM83G
57462	-5.059438295	1.042082936	-9.018326941	5.21E-06	0.000124899	4.625253719	KIAA1161;KIAA1161	KIAA1161
3914	-4.848229147	1.089297728	-9.016582721	5.22E-06	0.000124942	4.60774556	LAMB3;laminin, beta 3	LAMB3
3899	6.299882869	4.616072099	9.015156526	5.22E-06	0.000124971	4.625331687	AFF3;AF4/FMR2 family, member 3	AFF3
4860	4.450071537	1.823896722	9.002586395	5.29E-06	0.00012621	4.613635907	PNP;purine nucleoside phosphorylase	PNP
3918	-5.743777339	1.281367087	-8.994192942	5.33E-06	0.000127167	4.605879214	LAMC2;laminin, gamma 2	LAMC2
147660	-5.247186235	1.140490548	-8.99004584	5.35E-06	0.000127524	4.595146749	ZNF578;zinc finger protein 578	ZNF578
114814	4.59474948	7.942222643	8.989534739	5.35E-06	0.000127524	4.549883875	GNRHR2;gonadotropin-releasing hormone (type 2) receptor 2, pseudogene	GNRHR2
8850	6.000891946	2.513543653	8.985684102	5.37E-06	0.000127928	4.594802034	KAT2B;K(lysine) acetyltransferase 2B	KAT2B
7782	5.615662525	8.812001066	8.983257555	5.39E-06	0.000128156	4.575363736	SLC30A4;solute carrier family 30 (zinc transporter), member 4	SLC30A4
4350	3.520915433	0.924402911	8.977958066	5.41E-06	0.000128743	4.548036318	MPG;N-methylpurine-DNA glycosylase	MPG
2321	-5.313572259	1.544736043	-8.971808901	5.45E-06	0.00012944	4.580539524	FLT1;fms-related tyrosine kinase 1	FLT1
3038	4.542724129	7.554849282	8.958430109	5.52E-06	0.000130686	4.567666512	HAS3;hyaluronan synthase 3	HAS3
353322	5.655331217	2.852593832	8.95690609	5.53E-06	0.000130806	4.56537329	ANKRD37;ankyrin repeat domain 37	ANKRD37
6464	5.310659494	3.338062907	8.953030111	5.55E-06	0.000130929	4.564009502	SHC1;SHC (Src homology 2 domain containing) transforming protein 1	SHC1
4580	3.25175136	1.349947777	8.944065901	5.60E-06	0.000131926	4.555658797	MTX1;metaxin 1	MTX1
51377	2.73678248	7.458363904	8.938994753	5.62E-06	0.00013241	4.460754727	UCHL5;ubiquitin carboxyl-terminal hydrolase L5	UCHL5
745	-5.09031077	3.340188948	-8.938182179	5.63E-06	0.00013241	4.550880812	MYRF;myelin regulatory factor	MYRF
25956	-5.795079489	1.347478176	-8.935859473	5.64E-06	0.00013241	4.542469285	SEC31B;SEC31 homolog B (S. cerevisiae)	SEC31B
125336	-5.41425978	2.636152198	-8.925022803	5.70E-06	0.000133567	4.536778328	LOXHD1;lipoxygenase homology domains 1	LOXHD1
55239	5.356691252	3.145044586	8.922188565	5.72E-06	0.000133786	4.533488342	OGFOD1;2-oxoglutarate and iron-dependent oxygenase domain containing 1	OGFOD1
2209	5.376966031	1.620914581	8.914917516	5.76E-06	0.000134663	4.530314334	FCGR1A;Fc fragment of IgG, high affinity Ia, receptor (CD64)	FCGR1A
285533	-5.623836146	1.296642944	-8.911375173	5.78E-06	0.000135053	4.517867608	RNF175;ring finger protein 175	RNF175
2066	-6.832637628	1.612384626	-8.907013828	5.80E-06	0.000135402	4.522994962	ERBB4;v-erb-b2 avian erythroblastic leukemia viral oncogene homolog 4	ERBB4
6208	7.086838843	1.637049354	8.90191456	5.83E-06	0.000135926	4.517475825	RPS14;ribosomal protein S14	RPS14
7555	7.981916635	2.968677931	8.900709811	5.84E-06	0.00013601	4.516097118	CNBP;CCHC-type zinc finger, nucleic acid binding protein	CNBP
79660	5.101046344	3.245233609	8.898732379	5.85E-06	0.000136197	4.511551653	PPP1R3B;protein phosphatase 1, regulatory subunit 3B	PPP1R3B
3371	-6.029780476	1.350090072	-8.896614512	5.86E-06	0.000136403	4.512284377	TNC;tenascin C	TNC
9194	-6.253387978	1.408566159	-8.895382723	5.87E-06	0.000136492	4.511747393	SLC16A7;solute carrier family 16 (monocarboxylate transporter), member 7	SLC16A7
1636	-5.601019286	2.002402305	-8.88999239	5.90E-06	0.00013706	4.503088892	ACE;angiotensin I converting enzyme	ACE
116841	2.108512978	5.425088424	8.878457401	5.97E-06	0.000138384	4.46553779	SNAP47;synaptosomal-associated protein, 47kDa	SNAP47
4595	4.278821007	1.339263673	8.876138675	5.98E-06	0.000138622	4.493451198	MUTYH;mutY homolog	MUTYH
220074	2.175815142	7.764459046	8.870754134	6.01E-06	0.000139277	4.483337292	LRTOMT;leucine rich transmembrane and O-methyltransferase domain containing	LRTOMT
9135	6.723159904	3.854241172	8.862912315	6.06E-06	0.000140273	4.476912511	RABEP1;rabaptin, RAB GTPase binding effector protein 1	RABEP1
3798	-4.935192322	1.180090624	-8.847060047	6.15E-06	0.000142313	4.454531678	KIF5A;kinesin family member 5A	KIF5A
79722	-5.32720732	1.127411041	-8.846259475	6.16E-06	0.000142346	4.458637587	ANKRD55;ankyrin repeat domain 55	ANKRD55
5099	-6.078064593	1.635157298	-8.818264071	6.33E-06	0.000145993	4.431966846	PCDH7;protocadherin 7	PCDH7
80144	-6.722406944	3.908162931	-8.809783209	6.38E-06	0.000146915	4.425213809	FRAS1;Fraser extracellular matrix complex subunit 1	FRAS1
27330	4.145588436	3.189161637	8.809631366	6.38E-06	0.000146915	4.426232011	RPS6KA6;ribosomal protein S6 kinase, 90kDa, polypeptide 6	RPS6KA6
10974	4.430464654	2.224876746	8.80641176	6.40E-06	0.0001473	4.424781619	ADIRF;adipogenesis regulatory factor	ADIRF
6833	-5.596784144	1.75933364	-8.794782862	6.48E-06	0.000148867	4.396376439	ABCC8;ATP-binding cassette, sub-family C (CFTR/MRP), member 8	ABCC8
221895	5.432832737	2.983566343	8.794532215	6.48E-06	0.000148867	4.407384324	JAZF1;JAZF zinc finger 1	JAZF1
85301	-5.195778887	2.894873212	-8.785793102	6.53E-06	0.00014983	4.406368735	COL27A1;collagen, type XXVII, alpha 1	COL27A1
2926	5.671193478	3.456702348	8.782481457	6.56E-06	0.000150156	4.402275913	GRSF1;G-rich RNA sequence binding factor 1	GRSF1
4168	-4.609439674	0.907779833	-8.769674324	6.64E-06	0.000151711	4.386587693	MCF2;MCF.2 cell line derived transforming sequence	MCF2
100873954	2.364255045	7.040820908	8.739186579	6.84E-06	0.000156041	4.355797387	SNRK-AS1;SNRK antisense RNA 1	SNRK-AS1
11112	5.57977593	2.484749173	8.733288873	6.88E-06	0.000156785	4.352096791	HIBADH;3-hydroxyisobutyrate dehydrogenase	HIBADH
55255	5.350431323	1.017195214	8.718174513	6.99E-06	0.000159067	4.34139006	WDR41;WD repeat domain 41	WDR41
81853	6.42346974	1.474818419	8.71520454	7.01E-06	0.00015945	4.338574289	TMEM14B;transmembrane protein 14B	TMEM14B
1808	-5.059442597	1.275914923	-8.708369809	7.06E-06	0.000160361	4.32854691	DPYSL2;dihydropyrimidinase-like 2	DPYSL2
283349	6.044511292	2.358591986	8.699779695	7.12E-06	0.000161473	4.322618745	RASSF3;Ras association (RalGDS/AF-6) domain family member 3	RASSF3
51192	3.8917385	0.513652757	8.696173885	7.14E-06	0.000161966	4.319883289	CKLF;chemokine-like factor	CKLF
728378	5.400803697	2.778894953	8.689736755	7.19E-06	0.00016283	4.304126303	POTEF;POTE ankyrin domain family, member F	POTEF
56776	-5.780275838	1.233419988	-8.67497614	7.29E-06	0.000165063	4.299340286	FMN2;formin 2	FMN2
50506	-5.165420776	1.592224376	-8.67036618	7.33E-06	0.000165644	4.274050336	DUOX2;dual oxidase 2	DUOX2
23746	-4.185303501	0.787740842	-8.66235821	7.39E-06	0.000166702	4.284190801	AIPL1;aryl hydrocarbon receptor interacting protein-like 1	AIPL1
84340	6.248708266	3.726800604	8.659075267	7.41E-06	0.000167093	4.278827855	GFM2;G elongation factor, mitochondrial 2	GFM2
8828	-5.162648649	1.384823455	-8.655380134	7.44E-06	0.000167596	4.273338088	NRP2;neuropilin 2	NRP2
8976	5.285944872	2.648975569	8.639513281	7.56E-06	0.000170091	4.255700535	WASL;Wiskott-Aldrich syndrome-like	WASL
5788	-4.888631343	1.442699346	-8.628461814	7.64E-06	0.000171797	4.248091177	PTPRC;protein tyrosine phosphatase, receptor type, C	PTPRC
10351	-5.320989182	1.109589022	-8.627405799	7.65E-06	0.000171886	4.249347847	ABCA8;ATP-binding cassette, sub-family A (ABC1), member 8	ABCA8
84696	6.437805255	3.961773605	8.622479302	7.69E-06	0.000172643	4.237543848	ABHD1;abhydrolase domain containing 1	ABHD1
259232	-4.756683326	1.453864526	-8.615857134	7.74E-06	0.000173699	4.224304866	NALCN;sodium leak channel, non-selective	NALCN
1213	7.969544611	5.029571731	8.611190474	7.77E-06	0.000174408	4.22945201	CLTC;clathrin, heavy chain (Hc)	CLTC
10921	4.722603399	2.532125732	8.605165919	7.82E-06	0.000175195	4.231302824	RNPS1;RNA binding protein S1, serine-rich domain	RNPS1
63891	3.77956808	7.526721469	8.60132609	7.85E-06	0.000175777	4.214967639	RNF123;ring finger protein 123	RNF123
90865	-4.450518012	0.927935649	-8.596874666	7.89E-06	0.00017647	4.215632215	IL33;interleukin 33	IL33
811	4.490022041	2.22987144	8.584188752	7.99E-06	0.000178637	4.202031852	CALR;calreticulin	CALR
90933	5.609483576	1.366198079	8.57777603	8.04E-06	0.000179601	4.203107601	TRIM41;tripartite motif containing 41	TRIM41
310	6.786732732	2.463516771	8.560512002	8.18E-06	0.000182456	4.187554636	ANXA7;annexin A7	ANXA7
60481	5.490892471	2.910863464	8.557588446	8.20E-06	0.000182843	4.179830383	ELOVL5;ELOVL fatty acid elongase 5	ELOVL5
3093	6.586901107	2.104939435	8.554718729	8.23E-06	0.000183231	4.181841907	UBE2K;ubiquitin-conjugating enzyme E2K	UBE2K
26471	5.707121216	1.27295079	8.551261225	8.26E-06	0.000183675	4.178296891	NUPR1;nuclear protein, transcriptional regulator, 1	NUPR1
29101	5.019639092	2.871080305	8.546683966	8.30E-06	0.000184427	4.161036704	SSU72;SSU72 RNA polymerase II CTD phosphatase homolog (S. cerevisiae)	SSU72
54918	5.067641129	0.951628089	8.54065313	8.35E-06	0.000185137	4.167985335	CMTM6;CKLF-like MARVEL transmembrane domain containing 6	CMTM6
10043	-4.277993836	0.799528992	-8.532324301	8.42E-06	0.000186425	4.155668555	TOM1;target of myb1 (chicken)	TOM1
3611	6.362825144	3.558342747	8.50419037	8.66E-06	0.00019139	4.120985791	ILK;integrin-linked kinase	ILK
124245	3.307134517	2.477563626	8.503715133	8.66E-06	0.00019139	4.128466925	ZC3H18;zinc finger CCCH-type containing 18	ZC3H18
26986	7.442139437	4.395130271	8.502744617	8.67E-06	0.000191477	4.121032692	PABPC1;poly(A) binding protein, cytoplasmic 1	PABPC1
256764	-4.128575723	0.736484831	-8.499943998	8.70E-06	0.000191818	4.124195954	WDR72;WD repeat domain 72	WDR72
53947	3.870663054	0.447885443	8.485695107	8.82E-06	0.000194097	4.113765849	A4GALT;alpha 1,4-galactosyltransferase	A4GALT
10608	3.356819481	1.144411774	8.481999078	8.86E-06	0.000194519	4.105785434	MXD4;MAX dimerization protein 4	MXD4
7942	-5.088390999	1.062637108	-8.47943475	8.88E-06	0.000194821	4.106271633	TFEB;transcription factor EB	TFEB
10298	4.564308237	2.553366762	8.467860842	8.98E-06	0.000197021	4.088048901	PAK4;p21 protein (Cdc42/Rac)-activated kinase 4	PAK4
6098	-5.254326839	1.373375824	-8.461553253	9.04E-06	0.00019808	4.084819309	ROS1;ROS proto-oncogene 1 , receptor tyrosine kinase	ROS1
55739	2.590672648	1.82531809	8.435135901	9.29E-06	0.000203052	4.059971198	CARKD;carbohydrate kinase domain containing	CARKD
219833	-5.00985089	0.960790891	-8.426206118	9.37E-06	0.000204695	4.047098223	C11orf45;chromosome 11 open reading frame 45	C11orf45
148789	6.738928376	4.32481309	8.418572202	9.45E-06	0.000206188	4.040015371	B3GALNT2;beta-1,3-N-acetylgalactosaminyltransferase 2	B3GALNT2
6611	6.969503476	4.130887388	8.417903117	9.45E-06	0.000206221	4.044365621	SMS;spermine synthase	SMS
23086	6.468118674	3.829508187	8.414271527	9.49E-06	0.000206879	4.03121819	EXPH5;exophilin 5	EXPH5
6137	5.844550059	3.325274927	8.404217476	9.59E-06	0.000208906	4.031066034	RPL13;ribosomal protein L13	RPL13
2517	2.824904956	1.201812955	8.402260044	9.61E-06	0.000209215	4.02845677	FUCA1;fucosidase, alpha-L- 1, tissue	FUCA1
255512	4.210449684	0.692379328	8.401087954	9.62E-06	0.000209357	4.028512898	TOLLIP-AS1;TOLLIP antisense RNA 1 (head to head)	TOLLIP-AS1
8575	4.604672681	1.830049413	8.390921071	9.72E-06	0.000211435	4.012535748	PRKRA;protein kinase, interferon-inducible double stranded RNA dependent activator	PRKRA
91445	4.705689218	3.791046055	8.367968355	9.95E-06	0.00021624	3.996771227	RNF185;ring finger protein 185	RNF185
10730	6.455601719	2.710291057	8.36176857	1.00E-05	0.00021728	3.990615882	YME1L1;YME1-like 1 ATPase	YME1L1
22794	5.684748008	1.135248232	8.360785876	1.00E-05	0.000217387	3.988571133	CASC3;cancer susceptibility candidate 3	CASC3
5393	4.026641086	0.593114203	8.359307116	1.00E-05	0.000217445	3.987881273	EXOSC9;exosome component 9	EXOSC9
6205	3.851331566	2.24790924	8.359009246	1.00E-05	0.000217445	3.979606755	RPS11;ribosomal protein S11	RPS11
5934	6.093654462	3.890898372	8.35313944	1.01E-05	0.000218646	3.970815179	RBL2;retinoblastoma-like 2	RBL2
196996	-5.679336984	1.189280407	-8.347319408	1.02E-05	0.000219843	3.966020269	GRAMD2;GRAM domain containing 2	GRAMD2
56884	-5.684471123	1.210117323	-8.335970939	1.03E-05	0.000222193	3.955424844	FSTL5;follistatin-like 5	FSTL5
1998	4.96534261	0.94273274	8.329355258	1.04E-05	0.000223433	3.956468133	ELF2;E74-like factor 2 (ets domain transcription factor)	ELF2
3363	-5.266125627	1.221751232	-8.329054749	1.04E-05	0.000223433	3.957834171	HTR7;5-hydroxytryptamine (serotonin) receptor 7, adenylate cyclase-coupled	HTR7
8408	2.466540726	1.2698918	8.328219499	1.04E-05	0.00022351	3.949417101	ULK1;unc-51 like autophagy activating kinase 1	ULK1
79573	-5.122139912	1.081835521	-8.327670264	1.04E-05	0.000223521	3.948531013	TTC13;tetratricopeptide repeat domain 13	TTC13
2660	-4.949222579	0.941825698	-8.321368292	1.04E-05	0.00022486	3.941242268	MSTN;myostatin	MSTN
23521	6.204179711	2.349036173	8.310873732	1.05E-05	0.000227071	3.937922949	RPL13A;ribosomal protein L13a	RPL13A
6950	5.112548821	8.253216164	8.30019508	1.07E-05	0.000229232	3.925957925	TCP1;t-complex 1	TCP1
10044	-4.108325893	0.746984322	-8.285316425	1.08E-05	0.000232422	3.912463568	SH2D3C;SH2 domain containing 3C	SH2D3C
6772	4.66517947	4.178188649	8.281662861	1.09E-05	0.000233084	3.906016415	STAT1;signal transducer and activator of transcription 1, 91kDa	STAT1
23399	4.017515456	2.28731146	8.280698646	1.09E-05	0.000233084	3.892206068	CTDNEP1;CTD nuclear envelope phosphatase 1	CTDNEP1
2288	6.14326	3.252713362	8.280163076	1.09E-05	0.000233084	3.891979677	FKBP4;FK506 binding protein 4, 59kDa	FKBP4
1019	4.945616167	2.708907372	8.270360059	1.10E-05	0.00023532	3.882384338	CDK4;cyclin-dependent kinase 4	CDK4
6507	-5.296990608	1.042451387	-8.265632887	1.11E-05	0.000236354	3.88229924	SLC1A3;solute carrier family 1 (glial high affinity glutamate transporter), member 3	SLC1A3
94160	-4.266186828	1.358604431	-8.260206736	1.11E-05	0.000237443	3.875310383	ABCC12;ATP-binding cassette, sub-family C (CFTR/MRP), member 12	ABCC12
401546	5.60038497	1.303187979	8.256172017	1.12E-05	0.000238316	3.882523369	C9orf152;chromosome 9 open reading frame 152	C9orf152
81544	-5.821781317	1.355619889	-8.247641312	1.13E-05	0.00024031	3.875929514	GDPD5;glycerophosphodiester phosphodiesterase domain containing 5	GDPD5
51582	5.282919419	0.982257596	8.239819763	1.14E-05	0.00024202	3.865834217	AZIN1;antizyme inhibitor 1	AZIN1
1984	4.870608145	3.068616134	8.228634648	1.15E-05	0.000244598	3.834935	EIF5A;eukaryotic translation initiation factor 5A	EIF5A
2879	5.109183755	1.819430449	8.222232663	1.16E-05	0.00024598	3.847224667	GPX4;glutathione peroxidase 4	GPX4
8793	-2.013915917	0.482222035	-8.219422309	1.16E-05	0.000246575	3.844718018	TNFRSF10D;tumor necrosis factor receptor superfamily, member 10d, decoy with truncated death domain	TNFRSF10D
9295	4.666536506	1.397382592	8.215449095	1.16E-05	0.000247348	3.841829183	SRSF11;serine/arginine-rich splicing factor 11	SRSF11
51642	3.695313231	0.950755339	8.215433763	1.16E-05	0.000247348	3.836873793	MRPL48;mitochondrial ribosomal protein L48	MRPL48
84899	-4.976919874	1.443186974	-8.210710108	1.17E-05	0.000248314	3.838357633	TMTC4;transmembrane and tetratricopeptide repeat containing 4	TMTC4
148170	4.409342918	0.924831664	8.205211133	1.18E-05	0.000249518	3.827328129	CDC42EP5;CDC42 effector protein (Rho GTPase binding) 5	CDC42EP5
55783	5.324021287	1.840377498	8.199572976	1.18E-05	0.000250829	3.825201801	CMTR2;cap methyltransferase 2	CMTR2
4724	4.695266423	1.415339721	8.195582094	1.19E-05	0.000251492	3.82123492	NDUFS4;NADH dehydrogenase (ubiquinone) Fe-S protein 4, 18kDa (NADH-coenzyme Q reductase)	NDUFS4
79977	6.081651423	4.321262418	8.184621158	1.20E-05	0.000254254	3.7965112	GRHL2;grainyhead-like 2 (Drosophila)	GRHL2
317781	-5.405815407	2.795616784	-8.183825396	1.20E-05	0.00025427	3.793022855	DDX51;DEAD (Asp-Glu-Ala-Asp) box polypeptide 51	DDX51
51187	4.770792419	0.865931327	8.183477492	1.20E-05	0.00025427	3.808004711	RSL24D1;ribosomal L24 domain containing 1	RSL24D1
9884	4.768009457	3.452722524	8.183107543	1.20E-05	0.00025427	3.803344122	LRRC37A;leucine rich repeat containing 37A	LRRC37A
80210	-5.419720546	1.642122328	-8.181522104	1.21E-05	0.000254434	3.808932496	ARMC9;armadillo repeat containing 9	ARMC9
171568	4.728476027	7.797420849	8.166852727	1.23E-05	0.000258101	3.792777203	POLR3H;polymerase (RNA) III (DNA directed) polypeptide H (22.9kD)	POLR3H
23569	-4.774674611	1.054852421	-8.164167003	1.23E-05	0.000258696	3.789294404	PADI4;peptidyl arginine deiminase, type IV	PADI4
4717	2.858709201	0.864356282	8.163408846	1.23E-05	0.000258771	3.778389061	NDUFC1;NADH dehydrogenase (ubiquinone) 1, subcomplex unknown, 1, 6kDa	NDUFC1
91283	4.152378275	1.306879625	8.153201835	1.24E-05	0.000261022	3.778554507	MSANTD3;Myb/SANT-like DNA-binding domain containing 3	MSANTD3
54545	5.263440447	2.619897068	8.141475924	1.26E-05	0.000263981	3.751295207	MTMR12;myotubularin related protein 12	MTMR12
121260	-3.519836751	0.515762064	-8.131265299	1.27E-05	0.000266643	3.757517735	SLC15A4;solute carrier family 15 (oligopeptide transporter), member 4	SLC15A4
27229	7.14183941	4.466788911	8.128464918	1.28E-05	0.000267203	3.732659342	TUBGCP4;tubulin, gamma complex associated protein 4	TUBGCP4
100132163	5.773323335	3.868240958	8.121509271	1.28E-05	0.000269025	3.739418056	PHKA2-AS1;PHKA2 antisense RNA 1	PHKA2-AS1
29882	4.202349341	2.201106491	8.115806602	1.29E-05	0.000270505	3.716628899	ANAPC2;anaphase promoting complex subunit 2	ANAPC2
38	5.465620483	2.82728156	8.113300736	1.30E-05	0.000271082	3.720115925	ACAT1;acetyl-CoA acetyltransferase 1	ACAT1
84839	-4.842438292	1.001705756	-8.103950388	1.31E-05	0.000273485	3.729802231	RAX2;retina and anterior neural fold homeobox 2	RAX2
7126	4.671314809	4.694058345	8.100285291	1.31E-05	0.000274266	3.725761951	TNFAIP1;tumor necrosis factor, alpha-induced protein 1 (endothelial)	TNFAIP1
6263	-5.838063407	4.299853076	-8.087095282	1.33E-05	0.00027796	3.697709793	RYR3;ryanodine receptor 3	RYR3
7297	-3.628227654	1.182715006	-8.07905513	1.34E-05	0.00028007	3.704336712	TYK2;tyrosine kinase 2	TYK2
23492	3.800536358	2.24597248	8.063608244	1.37E-05	0.000284077	3.668549356	CBX7;chromobox homolog 7	CBX7
93034	4.311933237	0.690990436	8.061826493	1.37E-05	0.00028447	3.678782507	NT5C1B;5'-nucleotidase, cytosolic IB	NT5C1B
5684	5.204974634	1.484917634	8.05624368	1.38E-05	0.000286009	3.676883294	PSMA3;proteasome (prosome, macropain) subunit, alpha type, 3	PSMA3
11010	7.407005593	4.381387005	8.045290638	1.39E-05	0.000289057	3.649538073	GLIPR1;GLI pathogenesis-related 1	GLIPR1
9254	5.28751541	4.599120866	8.045270196	1.39E-05	0.000289057	3.662281697	CACNA2D2;calcium channel, voltage-dependent, alpha 2/delta subunit 2	CACNA2D2
6102	4.096715798	1.161514886	8.033259985	1.41E-05	0.000292317	3.62927749	RP2;retinitis pigmentosa 2 (X-linked recessive)	RP2
800	6.01919255	3.671236749	8.029924543	1.41E-05	0.000293205	3.636268106	CALD1;caldesmon 1	CALD1
51	2.977062189	7.784301124	8.028033065	1.42E-05	0.000293647	3.638806989	ACOX1;acyl-CoA oxidase 1, palmitoyl	ACOX1
101927322	4.16465206	6.447609061	8.019497497	1.43E-05	0.000295855	3.643246944	LOC101927322;uncharacterized LOC101927322	LOC101927322
2263	-4.322301367	1.252751385	-8.014930567	1.44E-05	0.000297016	3.637503871	FGFR2;fibroblast growth factor receptor 2	FGFR2
4778	-4.205296605	0.837080098	-8.011509383	1.44E-05	0.000297948	3.634995948	NFE2;nuclear factor, erythroid 2	NFE2
8019	5.459419752	2.69386375	8.01021943	1.44E-05	0.000298209	3.617564583	BRD3;bromodomain containing 3	BRD3
374454	-5.863416041	1.488929986	-7.99631696	1.47E-05	0.000302343	3.592134471	KRT77;keratin 77	KRT77
5116	-2.456195416	4.348883942	-7.993794974	1.47E-05	0.000302855	3.615001598	PCNT;pericentrin	PCNT
388323	5.526979208	3.609333761	7.991493658	1.47E-05	0.000303148	3.595652568	GLTPD2;glycolipid transfer protein domain containing 2	GLTPD2
57511	2.510085351	1.606557275	7.98840961	1.48E-05	0.000303825	3.594967561	COG6;component of oligomeric golgi complex 6	COG6
22872	3.956963442	0.702963948	7.985293657	1.48E-05	0.000304553	3.605781042	SEC31A;SEC31 homolog A (S. cerevisiae)	SEC31A
9772	4.293893812	2.713402438	7.981888781	1.49E-05	0.000305508	3.584221538	KIAA0195;KIAA0195	KIAA0195
727897	-6.201169623	2.132952384	-7.969767289	1.51E-05	0.00030917	3.590561818	MUC5B;mucin 5B, oligomeric mucus/gel-forming	MUC5B
124817	4.07482415	6.816297162	7.962091914	1.52E-05	0.000311098	3.558046008	CNTD1;cyclin N-terminal domain containing 1	CNTD1
192670	4.683986673	1.956814958	7.961093698	1.52E-05	0.000311164	3.552335336	AGO4;argonaute RISC catalytic component 4	AGO4
23478	4.576531375	1.655490332	7.948416569	1.54E-05	0.000314897	3.550988484	SEC11A;SEC11 homolog A (S. cerevisiae)	SEC11A
20	-5.171091808	1.43584703	-7.947687683	1.54E-05	0.000314988	3.567984896	ABCA2;ATP-binding cassette, sub-family A (ABC1), member 2	ABCA2
29945	-4.281376403	2.244822955	-7.943748347	1.55E-05	0.000316006	3.545952731	ANAPC4;anaphase promoting complex subunit 4	ANAPC4
54885	4.631999098	3.018846946	7.920163562	1.59E-05	0.000323126	3.522436141	TBC1D8B;TBC1 domain family, member 8B (with GRAM domain)	TBC1D8B
25917	5.638583021	2.861333368	7.915637996	1.60E-05	0.000324379	3.507823939	THUMPD3;THUMP domain containing 3	THUMPD3
5708	4.420923462	2.630853628	7.91315724	1.60E-05	0.000325084	3.532973075	PSMD2;proteasome (prosome, macropain) 26S subunit, non-ATPase, 2	PSMD2
8502	4.495838926	1.714938095	7.884943686	1.65E-05	0.00033474	3.480633892	PKP4;plakophilin 4	PKP4
283106	3.09895901	0.167159058	7.881161946	1.66E-05	0.00033583	3.485346074	CSNK2A3;casein kinase 2, alpha 3 polypeptide	CSNK2A3
7494	5.115628308	3.704885754	7.881015371	1.66E-05	0.00033583	3.498277582	XBP1;X-box binding protein 1	XBP1
100507034	6.328880704	5.821481353	7.874238349	1.67E-05	0.000337792	3.460900484	PITRM1-AS1;PITRM1 antisense RNA 1	PITRM1-AS1
6780	5.612400236	3.136355287	7.872728016	1.67E-05	0.000338113	3.457671361	STAU1;staufen double-stranded RNA binding protein 1	STAU1
136	4.203926651	2.013553896	7.871505124	1.68E-05	0.000338295	3.457337595	ADORA2B;adenosine A2b receptor	ADORA2B
4651	-2.11418189	5.647202178	-7.861557908	1.69E-05	0.000341603	3.468234258	MYO10;myosin X	MYO10
25766	-4.427844924	1.513417753	-7.85116718	1.71E-05	0.000345278	3.45955727	PRPF40B;PRP40 pre-mRNA processing factor 40 homolog B (S. cerevisiae)	PRPF40B
4210	-5.617301752	1.404831853	-7.850338619	1.71E-05	0.000345378	3.4595261	MEFV;Mediterranean fever	MEFV
140456	-5.035165526	1.029954461	-7.850002586	1.71E-05	0.000345378	3.459449238	ASB11;ankyrin repeat and SOCS box containing 11, E3 ubiquitin protein ligase	ASB11
89845	-4.765039136	1.014426925	-7.848890945	1.72E-05	0.000345625	3.451652266	ABCC10;ATP-binding cassette, sub-family C (CFTR/MRP), member 10	ABCC10
8878	2.508954727	5.675778898	7.843699099	1.73E-05	0.000347397	3.460604372	SQSTM1;sequestosome 1	SQSTM1
55342	4.951748639	2.994759967	7.842837001	1.73E-05	0.000347552	3.427307821	STRBP;spermatid perinuclear RNA binding protein	STRBP
10741	3.152206982	1.315947004	7.83630402	1.74E-05	0.000349672	3.428501809	RBBP9;retinoblastoma binding protein 9	RBBP9
80745	3.810426632	0.830772356	7.831939173	1.75E-05	0.000351154	3.432231279	THUMPD2;THUMP domain containing 2	THUMPD2
55190	3.768793561	0.451586688	7.820205297	1.77E-05	0.000355288	3.419532227	NUDT11;nudix (nucleoside diphosphate linked moiety X)-type motif 11	NUDT11
54097	3.896892612	0.928049621	7.81458125	1.78E-05	0.00035694	3.394642152	FAM3B;family with sequence similarity 3, member B	FAM3B
2661	5.965967671	7.398692938	7.810625985	1.79E-05	0.000357954	3.424874348	GDF9;growth differentiation factor 9	GDF9
805	5.626453243	2.158461809	7.809959305	1.79E-05	0.000358041	3.399308217	CALM2;calmodulin 2 (phosphorylase kinase, delta)	CALM2
2885	3.988286466	2.111811819	7.808360733	1.79E-05	0.000358489	3.399784319	GRB2;growth factor receptor-bound protein 2	GRB2
10728	6.952726306	4.141978507	7.796810686	1.82E-05	0.00036265	3.381242811	PTGES3;prostaglandin E synthase 3 (cytosolic)	PTGES3
1353	2.795373393	6.801728743	7.7843728	1.84E-05	0.000366852	3.398446888	COX11;cytochrome c oxidase assembly homolog 11 (yeast)	COX11
9508	-5.314384202	1.558163676	-7.783248511	1.84E-05	0.000366965	3.390466478	ADAMTS3;ADAM metallopeptidase with thrombospondin type 1 motif, 3	ADAMTS3
51454	2.737827025	7.035634626	7.777979443	1.85E-05	0.000368892	3.361327116	GULP1;GULP, engulfment adaptor PTB domain containing 1	GULP1
285600	-4.54166916	2.035258307	-7.774388316	1.86E-05	0.000369979	3.386679588	KIAA0825;KIAA0825	KIAA0825
6331	-5.227817982	1.639706465	-7.769878983	1.87E-05	0.000371617	3.383025906	SCN5A;sodium channel, voltage-gated, type V, alpha subunit	SCN5A
3400	5.756006555	3.092640775	7.766910201	1.88E-05	0.00037264	3.347427559	ID4;inhibitor of DNA binding 4, dominant negative helix-loop-helix protein	ID4
50485	4.526473047	2.838819168	7.764573798	1.88E-05	0.000373326	3.355296801	SMARCAL1;SWI/SNF related, matrix associated, actin dependent regulator of chromatin, subfamily a-like 1	SMARCAL1
101928069	4.674071807	3.349496967	7.76303664	1.88E-05	0.000373678	3.340315133	LOC101928069;uncharacterized LOC101928069	LOC101928069
23677	5.326661739	3.051462339	7.760409623	1.89E-05	0.000374568	3.334177572	SH3BP4;SH3-domain binding protein 4	SH3BP4
8997	-6.063829254	1.908060823	-7.757180977	1.90E-05	0.000375538	3.367342537	KALRN;kalirin, RhoGEF kinase	KALRN
4716	4.321725726	0.659992363	7.757155539	1.90E-05	0.000375538	3.358601741	NDUFB10;NADH dehydrogenase (ubiquinone) 1 beta subcomplex, 10, 22kDa	NDUFB10
25776	5.131813491	1.604861759	7.751546423	1.91E-05	0.000377656	3.363319342	CBY1;chibby homolog 1 (Drosophila)	CBY1
7049	-5.304012782	3.064060281	-7.750541021	1.91E-05	0.00037789	3.323537093	TGFBR3;transforming growth factor, beta receptor III	TGFBR3
6432	5.601824908	1.187316845	7.740201824	1.93E-05	0.000381622	3.341109857	SRSF7;serine/arginine-rich splicing factor 7	SRSF7
673	4.393323033	2.208194315	7.734531643	1.94E-05	0.000383442	3.328909415	BRAF;B-Raf proto-oncogene, serine/threonine kinase	BRAF
6726	6.771346881	4.275927975	7.724994623	1.96E-05	0.000387264	3.303176918	SRP9;signal recognition particle 9kDa	SRP9
83700	4.049922273	6.414634638	7.723967424	1.97E-05	0.000387515	3.334452609	JAM3;junctional adhesion molecule 3	JAM3
83887	4.552001698	2.880113335	7.717447353	1.98E-05	0.000389912	3.291421914	TTLL2;tubulin tyrosine ligase-like family, member 2	TTLL2
26137	6.538354943	5.691089136	7.703846618	2.01E-05	0.000395372	3.293049104	ZBTB20;zinc finger and BTB domain containing 20	ZBTB20
57559	-4.926642288	1.123780229	-7.690727844	2.04E-05	0.000400237	3.297065937	STAMBPL1;STAM binding protein-like 1	STAMBPL1
10284	5.311324361	1.230810865	7.690314697	2.04E-05	0.000400237	3.2867355	SAP18;Sin3A-associated protein, 18kDa	SAP18
2965	5.528269063	1.96095552	7.689489785	2.04E-05	0.000400291	3.277311149	GTF2H1;general transcription factor IIH, polypeptide 1, 62kDa	GTF2H1
10140	5.577864399	3.254525988	7.689095155	2.04E-05	0.000400291	3.258272514	TOB1;transducer of ERBB2, 1	TOB1
1432	4.671003738	3.210780643	7.685959946	2.05E-05	0.000401478	3.266344699	MAPK14;mitogen-activated protein kinase 14	MAPK14
64786	5.246131181	3.450306458	7.680158054	2.06E-05	0.000403742	3.25280032	TBC1D15;TBC1 domain family, member 15	TBC1D15
284525	-6.387293255	1.459989821	-7.679966025	2.06E-05	0.000403742	3.257719747	SLC9C2;solute carrier family 9, member C2 (putative)	SLC9C2
285180	-3.798268317	0.839495485	-7.67012147	2.08E-05	0.000407737	3.262032327	RUFY4;RUN and FYVE domain containing 4	RUFY4
9945	-5.470285508	1.65926306	-7.669155997	2.09E-05	0.000407931	3.266565414	GFPT2;glutamine-fructose-6-phosphate transaminase 2	GFPT2
59286	4.17559977	0.533604648	7.668836165	2.09E-05	0.000407931	3.262372073	UBL5;ubiquitin-like 5	UBL5
55769	5.329380776	1.775218365	7.667235926	2.09E-05	0.000408456	3.262016896	ZNF83;zinc finger protein 83	ZNF83
1350	5.753644428	1.2381248	7.663308386	2.10E-05	0.000410009	3.25606427	COX7C;cytochrome c oxidase subunit VIIc	COX7C
3169	6.308938613	3.248675452	7.655932632	2.12E-05	0.000412532	3.218939197	FOXA1;forkhead box A1	FOXA1
8633	-4.479744055	1.162454303	-7.650889669	2.13E-05	0.000414491	3.255457601	UNC5C;unc-5 homolog C (C. elegans)	UNC5C
646471	4.773039539	7.49269918	7.631907151	2.17E-05	0.000422638	3.235217847	LOC646471;uncharacterized LOC646471	LOC646471
124944	4.375441399	1.835172339	7.630408407	2.18E-05	0.000422745	3.230502484	C17orf49;chromosome 17 open reading frame 49	C17orf49
24144	3.435500762	6.500350922	7.629247828	2.18E-05	0.000423089	3.229148289	TFIP11;tuftelin interacting protein 11	TFIP11
63925	-4.602847811	1.085697859	-7.626677595	2.19E-05	0.00042409	3.221196817	ZNF335;zinc finger protein 335	ZNF335
51079	4.721102836	0.78447587	7.620027109	2.20E-05	0.000427009	3.208997559	NDUFA13;NADH dehydrogenase (ubiquinone) 1 alpha subcomplex, 13	NDUFA13
27346	7.104304682	4.148323809	7.609495347	2.23E-05	0.000431709	3.169857682	TMEM97;transmembrane protein 97	TMEM97
4318	-3.945134549	0.846669813	-7.604035669	2.24E-05	0.000433796	3.176058871	MMP9;matrix metallopeptidase 9 (gelatinase B, 92kDa gelatinase, 92kDa type IV collagenase)	MMP9
389	3.618383027	4.542636806	7.597598562	2.26E-05	0.000436484	3.197117829	RHOC;ras homolog family member C	RHOC
5528	2.594729584	6.627328484	7.593397713	2.27E-05	0.000438107	3.149467604	PPP2R5D;protein phosphatase 2, regulatory subunit B', delta	PPP2R5D
27230	7.627359469	2.667088593	7.588988772	2.28E-05	0.000439433	3.174822648	SERP1;stress-associated endoplasmic reticulum protein 1	SERP1
4035	-6.243610319	3.424424301	-7.586068458	2.29E-05	0.000440447	3.141275465	LRP1;low density lipoprotein receptor-related protein 1	LRP1
100129842	2.971961396	1.853600053	7.584071388	2.29E-05	0.000440811	3.152422534	ZNF737;zinc finger protein 737	ZNF737
487	2.138295777	5.450416402	7.578632867	2.31E-05	0.000443061	3.160019963	ATP2A1;ATPase, Ca++ transporting, cardiac muscle, fast twitch 1	ATP2A1
57636	-5.957552185	1.50209161	-7.572486252	2.32E-05	0.000445469	3.137657798	ARHGAP23;Rho GTPase activating protein 23	ARHGAP23
286140	3.665686493	1.212834408	7.571527216	2.32E-05	0.000445738	3.125226398	RNF5P1;ring finger protein 5, E3 ubiquitin protein ligase pseudogene 1	RNF5P1
51727	7.583557792	4.204543493	7.567335133	2.33E-05	0.000447121	3.133374618	CMPK1;cytidine monophosphate (UMP-CMP) kinase 1, cytosolic	CMPK1
2021	3.134190495	6.301253752	7.566473071	2.34E-05	0.000447212	3.16456608	ENDOG;endonuclease G	ENDOG
826	4.468477546	1.607128451	7.549416769	2.38E-05	0.000454297	3.112850375	CAPNS1;calpain, small subunit 1	CAPNS1
3251	5.78617644	1.41732338	7.543677715	2.40E-05	0.000456772	3.119301106	HPRT1;hypoxanthine phosphoribosyltransferase 1	HPRT1
1555	-4.990238876	0.967719348	-7.542325417	2.40E-05	0.000457249	3.1045343	CYP2B6;cytochrome P450, family 2, subfamily B, polypeptide 6	CYP2B6
30	4.350420488	2.529107911	7.5367625	2.41E-05	0.000459662	3.08943184	ACAA1;acetyl-CoA acyltransferase 1	ACAA1
22978	5.635263188	3.095055338	7.533755256	2.42E-05	0.000460659	3.093885522	NT5C2;5'-nucleotidase, cytosolic II	NT5C2
57553	-3.259711147	3.631057082	-7.533582586	2.42E-05	0.000460659	3.109388828	MICAL3;microtubule associated monooxygenase, calponin and LIM domain containing 3	MICAL3
55207	4.953638892	0.830581785	7.522468292	2.45E-05	0.000465325	3.099239078	ARL8B;ADP-ribosylation factor-like 8B	ARL8B
2166	-5.579591738	1.260324806	-7.518666834	2.46E-05	0.000467084	3.108168302	FAAH;fatty acid amide hydrolase	FAAH
79751	3.978448723	1.697418307	7.517580503	2.47E-05	0.000467437	3.072730423	SLC25A22;solute carrier family 25 (mitochondrial carrier: glutamate), member 22	SLC25A22
7180	3.725418212	0.522789134	7.516762945	2.47E-05	0.000467651	3.096948802	CRISP2;cysteine-rich secretory protein 2	CRISP2
7058	-3.882281178	3.647271616	-7.513353271	2.48E-05	0.000469215	3.082451203	THBS2;thrombospondin 2	THBS2
10015	2.828140086	5.932119194	7.504647138	2.50E-05	0.00047357	3.099791978	PDCD6IP;programmed cell death 6 interacting protein	PDCD6IP
51131	4.88111594	1.348013971	7.501885047	2.51E-05	0.0004746	3.053419991	PHF11;PHD finger protein 11	PHF11
11173	-4.913606149	1.653884623	-7.496273565	2.53E-05	0.000477361	3.090499748	ADAMTS7;ADAM metallopeptidase with thrombospondin type 1 motif, 7	ADAMTS7
192668	-3.603260721	0.768277557	-7.494435124	2.53E-05	0.00047805	3.068352036	CYS1;cystin 1	CYS1
11331	3.161495078	1.448297564	7.494169939	2.53E-05	0.00047805	3.075091598	PHB2;prohibitin 2	PHB2
1508	5.211761947	3.341958003	7.469434176	2.60E-05	0.000490767	3.015972155	CTSB;cathepsin B	CTSB
6862	-4.854803495	2.17570271	-7.463719874	2.62E-05	0.000493598	3.003608296	T;T, brachyury homolog (mouse)	T
1069	5.739805291	1.189630943	7.463482977	2.62E-05	0.000493598	3.033258589	CETN2;centrin, EF-hand protein, 2	CETN2
158405	4.368057244	1.743213403	7.453225804	2.65E-05	0.000498845	2.992432231	KIAA1958;KIAA1958	KIAA1958
23061	4.765893704	2.924306758	7.452396916	2.65E-05	0.000499083	2.993804784	TBC1D9B;TBC1 domain family, member 9B (with GRAM domain)	TBC1D9B
9221	5.764780263	3.199093433	7.450556425	2.66E-05	0.000499888	3.019063319	NOLC1;nucleolar and coiled-body phosphoprotein 1	NOLC1
10451	-5.944532749	1.361018688	-7.447984453	2.67E-05	0.000501104	3.015529993	VAV3;vav 3 guanine nucleotide exchange factor	VAV3
5692	5.54692296	1.293485746	7.446011602	2.67E-05	0.000501987	3.01461354	PSMB4;proteasome (prosome, macropain) subunit, beta type, 4	PSMB4
27039	6.563584739	2.286370897	7.438222443	2.70E-05	0.00050616	2.998340233	PKD2L2;polycystic kidney disease 2-like 2	PKD2L2
5331	-4.945076823	1.106037973	-7.430377485	2.72E-05	0.000509836	3.011861906	PLCB3;phospholipase C, beta 3 (phosphatidylinositol-specific)	PLCB3
10418	-4.244074454	1.223719197	-7.421612168	2.75E-05	0.000514424	3.00428931	SPON1;spondin 1, extracellular matrix protein	SPON1
644809	4.658251312	2.309087587	7.42138874	2.75E-05	0.000514424	2.958872115	C15orf56;chromosome 15 open reading frame 56	C15orf56
51380	4.16531849	3.875914432	7.41504416	2.77E-05	0.000517407	2.991440034	CSAD;cysteine sulfinic acid decarboxylase	CSAD
84176	-5.010361622	1.131923847	-7.413092525	2.77E-05	0.000518312	2.986799872	MYH16;myosin, heavy chain 16 pseudogene	MYH16
10929	4.675347507	1.159592827	7.403054064	2.80E-05	0.000523492	2.981217944	SRSF8;serine/arginine-rich splicing factor 8	SRSF8
79958	2.748225136	7.885557344	7.397673796	2.82E-05	0.000526436	2.93431316	DENND1C;DENN/MADD domain containing 1C	DENND1C
26249	-3.955914248	1.528080707	-7.395781209	2.83E-05	0.000527323	2.981762015	KLHL3;kelch-like family member 3	KLHL3
689	6.478019695	2.346265478	7.381040689	2.87E-05	0.000535435	2.943981481	BTF3;basic transcription factor 3	BTF3
51275	3.29109197	5.895959071	7.363807883	2.93E-05	0.000544734	2.947142163	MAPKAPK5-AS1;MAPKAPK5 antisense RNA 1	MAPKAPK5-AS1
29119	-6.305045963	1.449086384	-7.357203712	2.95E-05	0.000548326	2.895876516	CTNNA3;catenin (cadherin-associated protein), alpha 3	CTNNA3
55593	4.999633041	1.325924501	7.35675985	2.95E-05	0.000548357	2.905868137	OTUD5;OTU deubiquitinase 5	OTUD5
10585	-4.683768254	2.468170848	-7.355607912	2.96E-05	0.000548828	2.903154847	POMT1;protein-O-mannosyltransferase 1	POMT1
767846	3.775202664	0.565112007	7.353054785	2.97E-05	0.00055017	2.909713783	PFN1P2;profilin 1 pseudogene 2	PFN1P2
790955	3.916665669	1.600015967	7.35231325	2.97E-05	0.000550387	2.882335228	C11orf83;chromosome 11 open reading frame 83	C11orf83
1306	-4.638333865	1.672213329	-7.342952152	3.00E-05	0.000555752	2.886948349	COL15A1;collagen, type XV, alpha 1	COL15A1
2760	-4.22633839	0.641906414	-7.327675785	3.05E-05	0.000564699	2.895533925	GM2A;GM2 ganglioside activator	GM2A
275	3.602305174	1.076160327	7.317122944	3.09E-05	0.000570739	2.88740655	AMT;aminomethyltransferase	AMT
170961	-3.260491873	1.218567537	-7.312107177	3.11E-05	0.00057349	2.867796987	ANKRD24;ankyrin repeat domain 24	ANKRD24
29098	2.640083657	1.164688473	7.310921235	3.11E-05	0.000573911	2.853355344	RANGRF;RAN guanine nucleotide release factor	RANGRF
221060	4.091123764	0.932328711	7.310683267	3.11E-05	0.000573911	2.853972457	C10orf111;chromosome 10 open reading frame 111	C10orf111
5093	4.516295968	1.991458219	7.30555113	3.13E-05	0.000576756	2.836656955	PCBP1;poly(rC) binding protein 1	PCBP1
148898	4.83667001	3.540955238	7.302275452	3.14E-05	0.000578652	2.839529963	C1orf213;chromosome 1 open reading frame 213	C1orf213
64121	4.45983266	2.608086494	7.297840899	3.16E-05	0.000580808	2.825637706	RRAGC;Ras-related GTP binding C	RRAGC
5604	5.701752509	3.241959009	7.295815429	3.17E-05	0.00058189	2.814608048	MAP2K1;mitogen-activated protein kinase kinase 1	MAP2K1
22909	4.188643929	6.650484833	7.292842254	3.18E-05	0.000583604	2.866350895	FAN1;FANCD2/FANCI-associated nuclease 1	FAN1
7582	6.705766748	2.864831424	7.285759048	3.20E-05	0.000588067	2.800586415	ZNF33B;zinc finger protein 33B	ZNF33B
6124	8.444331909	2.452605865	7.284487343	3.21E-05	0.000588575	2.831914121	RPL4;ribosomal protein L4	RPL4
27250	4.500623439	4.520093136	7.270538046	3.26E-05	0.0005973	2.840982075	PDCD4;programmed cell death 4 (neoplastic transformation inhibitor)	PDCD4
4790	3.770258607	1.788988771	7.2688674	3.26E-05	0.000597914	2.78568841	NFKB1;nuclear factor of kappa light polypeptide gene enhancer in B-cells 1	NFKB1
4259	4.70184971	0.836186518	7.262041689	3.29E-05	0.000602058	2.805372544	MGST3;microsomal glutathione S-transferase 3	MGST3
54964	5.503336444	3.828746265	7.261220486	3.29E-05	0.000602359	2.778854962	C1orf56;chromosome 1 open reading frame 56	C1orf56
9563	-4.094183472	1.27433116	-7.260490903	3.30E-05	0.000602597	2.834404139	H6PD;hexose-6-phosphate dehydrogenase (glucose 1-dehydrogenase)	H6PD
6125	6.388313952	3.929035652	7.259633732	3.30E-05	0.000602923	2.780021297	RPL5;ribosomal protein L5	RPL5
6128	6.085113425	2.702922054	7.252887207	3.32E-05	0.000607317	2.804660986	RPL6;ribosomal protein L6	RPL6
51322	4.386685308	5.422616552	7.248388569	3.34E-05	0.000610179	2.809693482	WAC;WW domain containing adaptor with coiled-coil	WAC
55176	7.408155934	4.913700879	7.243184335	3.36E-05	0.000612747	2.755666511	SEC61A2;Sec61 alpha 2 subunit (S. cerevisiae)	SEC61A2
23007	-5.358382837	1.513342908	-7.241235776	3.37E-05	0.000613845	2.765421159	PLCH1;phospholipase C, eta 1	PLCH1
23218	-6.016567333	2.402802191	-7.231314842	3.41E-05	0.000620308	2.737819308	NBEAL2;neurobeachin-like 2	NBEAL2
2101	6.386544404	3.207515968	7.222964526	3.44E-05	0.000625721	2.729167063	ESRRA;estrogen-related receptor alpha	ESRRA
3837	5.883082706	3.93023762	7.220220887	3.45E-05	0.000627417	2.740311971	KPNB1;karyopherin (importin) beta 1	KPNB1
54878	5.337180131	2.906574551	7.214156082	3.47E-05	0.00063134	2.741968605	DPP8;dipeptidyl-peptidase 8	DPP8
54537	5.512393545	3.192702203	7.214022032	3.48E-05	0.00063134	2.726339038	FAM35A;family with sequence similarity 35, member A	FAM35A
91584	-6.482340337	3.380211103	-7.208409089	3.50E-05	0.000635139	2.730493395	PLXNA4;plexin A4	PLXNA4
4817	4.282927397	6.212496155	7.202538819	3.52E-05	0.000639153	2.765998272	NIT1;nitrilase 1	NIT1
79676	3.838290518	1.796495054	7.200824618	3.53E-05	0.000640133	2.724774504	OGFOD2;2-oxoglutarate and iron-dependent oxygenase domain containing 2	OGFOD2
23274	-3.649313419	2.93685771	-7.19511414	3.55E-05	0.000644064	2.72236117	CLEC16A;C-type lectin domain family 16, member A	CLEC16A
83959	-4.596029204	1.029863067	-7.190824341	3.57E-05	0.000646741	2.744651639	SLC4A11;solute carrier family 4, sodium borate transporter, member 11	SLC4A11
9583	-4.940603671	1.504863633	-7.190746742	3.57E-05	0.000646741	2.728412242	ENTPD4;ectonucleoside triphosphate diphosphohydrolase 4	ENTPD4
130026	-3.061924416	3.540345335	-7.17531532	3.63E-05	0.000657462	2.720182132	ICA1L;islet cell autoantigen 1,69kDa-like	ICA1L
6900	-4.815124392	1.734347607	-7.172019224	3.65E-05	0.00065939	2.719734783	CNTN2;contactin 2 (axonal)	CNTN2
51132	6.788390557	3.919086582	7.169471023	3.66E-05	0.000660982	2.684456231	RLIM;ring finger protein, LIM domain interacting	RLIM
55072	4.108507194	1.219114161	7.167353754	3.67E-05	0.000661991	2.681905961	RNF31;ring finger protein 31	RNF31
261729	6.069335021	3.46438402	7.167098122	3.67E-05	0.000661991	2.662046642	STEAP2;STEAP family member 2, metalloreductase	STEAP2
51022	4.696847081	1.022577316	7.166191818	3.67E-05	0.000662396	2.673107614	GLRX2;glutaredoxin 2	GLRX2
8291	-5.761784495	4.103899177	-7.165477388	3.67E-05	0.000662656	2.659927824	DYSF;dysferlin	DYSF
127731	-5.114468793	1.653327034	-7.162672458	3.69E-05	0.000664513	2.711940106	VWA5B1;von Willebrand factor A domain containing 5B1	VWA5B1
4826	4.090370618	0.663831305	7.158770797	3.70E-05	0.00066722	2.689103257	NNAT;neuronatin	NNAT
10528	4.337830786	1.168873956	7.149524109	3.74E-05	0.00067408	2.645018911	NOP56;NOP56 ribonucleoprotein	NOP56
143425	-4.057228963	0.87935632	-7.141220972	3.78E-05	0.000679691	2.659552915	SYT9;synaptotagmin IX	SYT9
8450	3.369949183	4.282579992	7.140534968	3.78E-05	0.000679937	2.696583088	CUL4B;cullin 4B	CUL4B
6192	6.176158638	1.30895027	7.137870087	3.79E-05	0.00068174	2.659520208	RPS4Y1;ribosomal protein S4, Y-linked 1	RPS4Y1
10300	-4.822479351	1.184251234	-7.135600017	3.80E-05	0.000682942	2.641071711	KATNB1;katanin p80 (WD repeat containing) subunit B 1	KATNB1
391356	5.135484843	2.898057556	7.127967364	3.84E-05	0.000688696	2.619034945	PTRHD1;peptidyl-tRNA hydrolase domain containing 1	PTRHD1
124602	-5.496616123	1.889467866	-7.124168596	3.85E-05	0.000691431	2.638120559	KIF19;kinesin family member 19	KIF19
2110	4.772702635	0.870153941	7.122204614	3.86E-05	0.000692706	2.635019289	ETFDH;electron-transferring-flavoprotein dehydrogenase	ETFDH
283234	-5.243015651	1.350938116	-7.119124105	3.88E-05	0.000694286	2.624294724	CCDC88B;coiled-coil domain containing 88B	CCDC88B
101928999	-3.342364746	0.992704341	-7.111159681	3.91E-05	0.000700415	2.645250646	IQCF5-AS1;IQCF5 antisense RNA 1	IQCF5-AS1
79807	-5.584509266	2.809525794	-7.106115595	3.94E-05	0.000703916	2.602223717	GSTCD;glutathione S-transferase, C-terminal domain containing	GSTCD
382	4.627340259	3.924421584	7.103269356	3.95E-05	0.000705939	2.605306163	ARF6;ADP-ribosylation factor 6	ARF6
118442	4.466561123	4.163300944	7.099261496	3.97E-05	0.000708923	2.621235219	GPR62;G protein-coupled receptor 62	GPR62
80135	4.448004774	1.658207259	7.093901377	3.99E-05	0.000713038	2.616850252	RPF1;ribosome production factor 1 homolog (S. cerevisiae)	RPF1
6954	3.763307742	1.630284348	7.085654012	4.03E-05	0.000719587	2.565798527	TCP11;t-complex 11, testis-specific	TCP11
440081	-4.58707704	1.298561877	-7.082640865	4.04E-05	0.000721801	2.597728218	DDX12P;DEAD/H (Asp-Glu-Ala-Asp/His) box polypeptide 12, pseudogene	DDX12P
10440	4.614364551	0.738861901	7.072624244	4.09E-05	0.000729315	2.58545739	TIMM17A;translocase of inner mitochondrial membrane 17 homolog A (yeast)	TIMM17A
4953	5.702958112	2.993147384	7.066392452	4.12E-05	0.000733993	2.592455683	ODC1;ornithine decarboxylase 1	ODC1
8031	7.990456033	5.338732915	7.061211581	4.15E-05	0.000738116	2.549999494	NCOA4;nuclear receptor coactivator 4	NCOA4
54549	-5.856652977	2.240959708	-7.050231393	4.20E-05	0.000746977	2.54967227	SDK2;sidekick cell adhesion molecule 2	SDK2
79017	3.924441687	0.73774711	7.048157625	4.21E-05	0.000748465	2.556712383	GGCT;gamma-glutamylcyclotransferase	GGCT
1997	3.022879547	1.831665715	7.046169856	4.22E-05	0.000749882	2.543461061	ELF1;E74-like factor 1 (ets domain transcription factor)	ELF1
727764	-4.197323777	2.114917549	-7.041742307	4.24E-05	0.000753442	2.542007564	MAFIP;MAFF interacting protein (pseudogene)	MAFIP
4040	-5.035536411	1.532361951	-7.039469584	4.25E-05	0.0007548	2.52977619	LRP6;low density lipoprotein receptor-related protein 6	LRP6
9948	4.988183379	3.083329447	7.038589697	4.26E-05	0.000755255	2.5131142	WDR1;WD repeat domain 1	WDR1
285855	5.561756403	1.163729431	7.033092515	4.28E-05	0.000759791	2.540716507	RPL7L1;ribosomal protein L7-like 1	RPL7L1
5532	5.54999972	3.54566108	7.031508953	4.29E-05	0.000760874	2.507592925	PPP3CB;protein phosphatase 3, catalytic subunit, beta isozyme	PPP3CB
4327	2.113666193	6.406241048	7.023205209	4.33E-05	0.000767066	2.566642491	MMP19;matrix metallopeptidase 19	MMP19
57647	-4.785342165	2.086181858	-7.022993447	4.33E-05	0.000767066	2.540227215	DHX37;DEAH (Asp-Glu-Ala-His) box polypeptide 37	DHX37
7358	5.535810419	2.037732929	7.022392145	4.34E-05	0.000767066	2.504738492	UGDH;UDP-glucose 6-dehydrogenase	UGDH
221710	2.646925774	0.29625785	7.021976279	4.34E-05	0.000767115	2.546795539	SMIM13;small integral membrane protein 13	SMIM13
84530	-5.690388582	1.85578756	-7.021356627	4.34E-05	0.000767346	2.502524813	SRRM4;serine/arginine repetitive matrix 4	SRRM4
10884	3.910095987	0.646906484	7.014220714	4.38E-05	0.000773119	2.533005504	MRPS30;mitochondrial ribosomal protein S30	MRPS30
94121	6.451297832	3.107258291	7.00967545	4.40E-05	0.000776911	2.490203277	SYTL4;synaptotagmin-like 4	SYTL4
6157	6.184506265	2.474045856	7.006047827	4.42E-05	0.000779313	2.50105375	RPL27A;ribosomal protein L27a	RPL27A
56163	-5.786844272	1.558398623	-7.002909885	4.44E-05	0.000781766	2.523800813	RNF17;ring finger protein 17	RNF17
4548	4.373761791	2.942792631	6.985628885	4.53E-05	0.000795409	2.495273681	MTR;5-methyltetrahydrofolate-homocysteine methyltransferase	MTR
57529	-4.700332006	0.959942702	-6.974933693	4.59E-05	0.000804225	2.483868477	RGAG1;retrotransposon gag domain containing 1	RGAG1
2068	-5.113396491	1.760988099	-6.97480208	4.59E-05	0.000804225	2.447076448	ERCC2;excision repair cross-complementation group 2	ERCC2
6827	4.333432798	2.534264536	6.972548478	4.60E-05	0.000806018	2.435664271	SUPT4H1;suppressor of Ty 4 homolog 1 (S. cerevisiae)	SUPT4H1
55135	5.574730549	4.307186221	6.97085401	4.61E-05	0.000807117	2.448999684	WRAP53;WD repeat containing, antisense to TP53	WRAP53
10906	5.112723422	2.188268724	6.970674139	4.61E-05	0.000807117	2.449634288	TRAFD1;TRAF-type zinc finger domain containing 1	TRAFD1
84661	4.973358569	0.868982163	6.953432745	4.70E-05	0.000822605	2.44727443	DPY30;dpy-30 homolog (C. elegans)	DPY30
10480	4.141764339	2.364602069	6.951608365	4.71E-05	0.000824028	2.429088974	EIF3M;eukaryotic translation initiation factor 3, subunit M	EIF3M
6926	5.627955947	4.221455166	6.94101328	4.77E-05	0.000834021	2.406285109	TBX3;T-box 3	TBX3
6234	4.626974277	2.302954337	6.934820437	4.81E-05	0.000839777	2.400330932	RPS28;ribosomal protein S28	RPS28
81624	-5.531720507	1.489722503	-6.923576883	4.87E-05	0.00084992	2.411231063	DIAPH3;diaphanous-related formin 3	DIAPH3
7431	6.321886622	3.696047328	6.919481727	4.89E-05	0.000853682	2.371536018	VIM;vimentin	VIM
6121	-5.782598528	1.42637181	-6.918167372	4.90E-05	0.000854651	2.376965667	RPE65;retinal pigment epithelium-specific protein 65kDa	RPE65
5998	-2.496277386	2.380932675	-6.917481948	4.91E-05	0.000854986	2.427460015	RGS3;regulator of G-protein signaling 3	RGS3
10002	-4.48859298	1.107993241	-6.910539875	4.95E-05	0.000861307	2.376161365	NR2E3;nuclear receptor subfamily 2, group E, member 3	NR2E3
55664	3.999132418	1.588354261	6.901040595	5.00E-05	0.000869584	2.360719143	CDC37L1;cell division cycle 37-like 1	CDC37L1
728747	-2.976813683	0.522857591	-6.896855705	5.03E-05	0.000873536	2.380674786	ANKRD20A4;ankyrin repeat domain 20 family, member A4	ANKRD20A4
9274	-5.552706681	2.095613308	-6.894658316	5.04E-05	0.000874521	2.35854092	BCL7C;B-cell CLL/lymphoma 7C	BCL7C
6652	7.75623056	5.306367045	6.894499742	5.04E-05	0.000874521	2.35219644	SORD;sorbitol dehydrogenase	SORD
55289	3.039672381	1.653740347	6.890704214	5.06E-05	0.000878094	2.332756364	ACOXL;acyl-CoA oxidase-like	ACOXL
23359	-4.437864206	1.076229179	-6.88021631	5.13E-05	0.000887266	2.381535407	FAM189A1;family with sequence similarity 189, member A1	FAM189A1
22898	-5.246186779	1.671388646	-6.876035984	5.15E-05	0.000890532	2.387943584	DENND3;DENN/MADD domain containing 3	DENND3
9201	-5.95368052	2.506782027	-6.874100477	5.16E-05	0.000892209	2.337378573	DCLK1;doublecortin-like kinase 1	DCLK1
957	4.763025615	1.564506728	6.871987799	5.18E-05	0.000893709	2.352673161	ENTPD5;ectonucleoside triphosphate diphosphohydrolase 5	ENTPD5
3608	3.716825539	4.015287427	6.87009228	5.19E-05	0.000895351	2.334738523	ILF2;interleukin enhancer binding factor 2	ILF2
404220	3.134384182	7.83222218	6.860881346	5.25E-05	0.000904446	2.320056863	C6orf201;chromosome 6 open reading frame 201	C6orf201
55449	6.062127361	6.033544346	6.859834004	5.25E-05	0.000905198	2.327895315	DHRS4-AS1;DHRS4 antisense RNA 1	DHRS4-AS1
360205	6.264022827	4.363164475	6.858165254	5.26E-05	0.00090662	2.297866453	PRAC2;prostate cancer susceptibility candidate 2	PRAC2
1104	-4.735677981	1.389155504	-6.856768839	5.27E-05	0.000907751	2.352291328	RCC1;regulator of chromosome condensation 1	RCC1
55308	3.154038187	1.075274956	6.844863297	5.35E-05	0.000919551	2.342438133	DDX19A;DEAD (Asp-Glu-Ala-Asp) box polypeptide 19A	DDX19A
2689	-4.791858529	1.056070311	-6.84399908	5.35E-05	0.000920119	2.315638822	GH2;growth hormone 2	GH2
338657	7.654321239	5.27803974	6.837132514	5.40E-05	0.000926905	2.268310709	CCDC84;coiled-coil domain containing 84	CCDC84
7691	4.467415922	1.494483729	6.835169205	5.41E-05	0.000928692	2.296012044	ZNF132;zinc finger protein 132	ZNF132
558	2.947082687	1.211555045	6.834757132	5.41E-05	0.000928766	2.30779825	AXL;AXL receptor tyrosine kinase	AXL
79747	-6.018721863	1.341439505	-6.818552142	5.52E-05	0.000945321	2.260427857	ADGB;androglobin	ADGB
100132911	5.401431737	3.08181262	6.816284988	5.53E-05	0.000947492	2.257638397	DPH3P1;diphthamide biosynthesis 3 pseudogene 1	DPH3P1
100526833	-5.447049066	1.180163754	-6.811973486	5.56E-05	0.000951735	2.24976307	SEPT5-GP1BB;SEPT5-GP1BB readthrough	SEPT5-GP1BB
126133	-5.52610287	1.546471509	-6.811853164	5.56E-05	0.000951735	2.239354578	ALDH16A1;aldehyde dehydrogenase 16 family, member A1	ALDH16A1
124637	4.531578669	2.060300205	6.811375234	5.57E-05	0.000951889	2.237734775	CYB5D1;cytochrome b5 domain containing 1	CYB5D1
3182	4.961524369	3.034941444	6.810518129	5.57E-05	0.000952473	2.247845689	HNRNPAB;heterogeneous nuclear ribonucleoprotein A/B	HNRNPAB
7298	5.720199964	2.011022205	6.804507576	5.61E-05	0.00095894	2.258300279	TYMS;thymidylate synthetase	TYMS
158056	-4.528357899	1.794104117	-6.801315609	5.63E-05	0.000962209	2.224665509	MAMDC4;MAM domain containing 4	MAMDC4
6708	-5.24484274	1.856687887	-6.792258414	5.69E-05	0.00097149	2.289678504	SPTA1;spectrin, alpha, erythrocytic 1	SPTA1
51068	5.362798145	2.520433417	6.788206842	5.72E-05	0.000975377	2.222227202	NMD3;NMD3 ribosome export adaptor	NMD3
23187	-5.970196474	2.585768581	-6.788090515	5.72E-05	0.000975377	2.219426949	PHLDB1;pleckstrin homology-like domain, family B, member 1	PHLDB1
10992	4.68623237	3.003998262	6.783606964	5.75E-05	0.000979996	2.208758874	SF3B2;splicing factor 3b, subunit 2, 145kDa	SF3B2
9263	4.901516304	3.378085851	6.781857889	5.76E-05	0.000981251	2.217318054	STK17A;serine/threonine kinase 17a	STK17A
5028	4.266426141	2.137730195	6.781856802	5.76E-05	0.000981251	2.203507017	P2RY1;purinergic receptor P2Y, G-protein coupled, 1	P2RY1
84516	3.541673854	3.353166528	6.78136839	5.77E-05	0.000981297	2.226568145	DCTN5;dynactin 5 (p25)	DCTN5
2355	3.694041315	2.037536248	6.770114775	5.85E-05	0.000993126	2.188369487	FOSL2;FOS-like antigen 2	FOSL2
11345	5.332199304	1.09583258	6.769186073	5.85E-05	0.000993425	2.224488693	GABARAPL2;GABA(A) receptor-associated protein-like 2	GABARAPL2
4848	3.89817788	3.435287795	6.754210301	5.96E-05	0.00100938	2.231562261	CNOT2;CCR4-NOT transcription complex, subunit 2	CNOT2
28972	4.387164973	2.721804234	6.752017943	5.97E-05	0.00101163	2.168313818	SPCS1;signal peptidase complex subunit 1 homolog (S. cerevisiae)	SPCS1
284729	-5.481095761	2.171773768	-6.742243512	6.05E-05	0.001022748	2.160460219	ESPNP;espin pseudogene	ESPNP
6175	6.059328917	3.822542732	6.735874047	6.09E-05	0.001030192	2.161610803	RPLP0;ribosomal protein, large, P0	RPLP0
10568	-4.244946295	1.358877835	-6.734561788	6.10E-05	0.001030985	2.227275813	SLC34A2;solute carrier family 34 (type II sodium/phosphate contransporter), member 2	SLC34A2
125950	-4.014530963	0.930867648	-6.700848154	6.35E-05	0.001070691	2.138731881	RAVER1;ribonucleoprotein, PTB-binding 1	RAVER1
65996	-4.381195751	1.416391106	-6.697709762	6.38E-05	0.001074321	2.168354347	CENPBD1P1;CENPBD1 pseudogene 1	CENPBD1P1
100506649	5.821384678	4.534833193	6.689205668	6.44E-05	0.001084537	2.087178172	PXN-AS1;PXN antisense RNA 1	PXN-AS1
8661	5.570135073	3.996743562	6.680012219	6.52E-05	0.001096215	2.090283901	EIF3A;eukaryotic translation initiation factor 3, subunit A	EIF3A
6386	5.212978672	1.159163812	6.679401283	6.52E-05	0.001096584	2.111080533	SDCBP;syndecan binding protein (syntenin)	SDCBP
8888	2.030678342	5.831888608	6.677892466	6.53E-05	0.001098146	2.166563769	MCM3AP;minichromosome maintenance complex component 3 associated protein	MCM3AP
1452	5.762639597	3.201562039	6.677103251	6.54E-05	0.001098229	2.073588864	CSNK1A1;casein kinase 1, alpha 1	CSNK1A1
5780	3.933662503	1.449988326	6.677093287	6.54E-05	0.001098229	2.109040948	PTPN9;protein tyrosine phosphatase, non-receptor type 9	PTPN9
54437	-4.628579764	1.687519035	-6.676833194	6.54E-05	0.001098229	2.100203107	SEMA5B;sema domain, seven thrombospondin repeats (type 1 and type 1-like), transmembrane domain (TM) and short cytoplasmic domain, (semaphorin) 5B	SEMA5B
27296	4.237139582	1.374198114	6.673278782	6.57E-05	0.00110252	2.104485017	TP53TG5;TP53 target 5	TP53TG5
9867	6.741216241	3.961729096	6.670591838	6.59E-05	0.001105667	2.072121728	PJA2;praja ring finger 2, E3 ubiquitin protein ligase	PJA2
57608	-4.961329882	1.802931673	-6.659992862	6.68E-05	0.001118605	2.11559073	KIAA1462;KIAA1462	KIAA1462
4900	3.39940127	0.304156515	6.656376229	6.71E-05	0.001123069	2.078925552	NRGN;neurogranin (protein kinase C substrate, RC3)	NRGN
80821	-4.380813556	1.482099476	-6.655514404	6.71E-05	0.001123793	2.128105251	DDHD1;DDHD domain containing 1	DDHD1
117178	3.986517147	1.961488286	6.648195813	6.77E-05	0.001133358	2.036450355	SSX2IP;synovial sarcoma, X breakpoint 2 interacting protein	SSX2IP
100652740	4.98910958	3.346729736	6.6469688	6.78E-05	0.001134139	2.040369088	PYCARDOS;PYCARD opposite strand	PYCARDOS
57325	4.055888349	0.561166832	6.642815912	6.82E-05	0.001138959	2.060314916	CSRP2BP;CSRP2 binding protein	CSRP2BP
10245	5.511476852	4.927222439	6.63663393	6.87E-05	0.001147082	2.038396564	TIMM17B;translocase of inner mitochondrial membrane 17 homolog B (yeast)	TIMM17B
51490	2.705217043	7.41496732	6.628012028	6.94E-05	0.001158701	2.037525402	C9orf114;chromosome 9 open reading frame 114	C9orf114
85236	3.474359042	1.383960976	6.622316899	6.99E-05	0.001165822	2.031056648	HIST1H2BK;histone cluster 1, H2bk	HIST1H2BK
130872	4.464646576	1.696860083	6.613940466	7.06E-05	0.001176828	2.016898968	AHSA2;AHA1, activator of heat shock 90kDa protein ATPase homolog 2 (yeast)	AHSA2
60494	-4.699062577	1.032673736	-6.612441048	7.07E-05	0.001178509	2.029267149	CCDC81;coiled-coil domain containing 81	CCDC81
2909	5.790615585	3.121298194	6.608746035	7.11E-05	0.001183352	1.99448992	ARHGAP35;Rho GTPase activating protein 35	ARHGAP35
56262	3.633263678	4.129085541	6.6080572	7.11E-05	0.001183874	2.027981659	LRRC8A;leucine rich repeat containing 8 family, member A	LRRC8A
6169	5.151919463	1.782738669	6.607339667	7.12E-05	0.001183967	2.032178796	RPL38;ribosomal protein L38	RPL38
5805	4.512940569	0.732613321	6.601865735	7.16E-05	0.00119047	2.021161275	PTS;6-pyruvoyltetrahydropterin synthase	PTS
100133286	5.446066354	6.985558833	6.601116817	7.17E-05	0.001190931	2.006229801	LOC100133286;uncharacterized LOC100133286	LOC100133286
100861532	-3.30548606	9.227676961	-6.600896861	7.17E-05	0.001190931	2.022641202	RNA45S5;RNA, 45S pre-ribosomal 5	RNA45S5
112936	2.641002273	10.00410662	6.599526646	7.19E-05	0.001191976	2.013594604	VPS26B;vacuolar protein sorting 26 homolog B (S. pombe)	VPS26B
29087	3.897668557	2.275373659	6.594397898	7.23E-05	0.001198979	1.991409989	THYN1;thymocyte nuclear protein 1	THYN1
55839	3.988584751	7.544345255	6.59194612	7.25E-05	0.001201618	2.013368031	CENPN;centromere protein N	CENPN
285463	3.027346354	9.436223248	6.580823175	7.35E-05	0.001216675	1.979730928	CTBP1-AS;CTBP1 antisense RNA	CTBP1-AS
79838	4.813925116	2.880790919	6.580773057	7.35E-05	0.001216675	1.964097918	TMC5;transmembrane channel-like 5	TMC5
221002	-4.675015153	0.895637599	-6.579764582	7.36E-05	0.001217693	2.01429205	RASGEF1A;RasGEF domain family, member 1A	RASGEF1A
595135	3.926676471	1.625782494	6.568392565	7.46E-05	0.001232903	1.939094875	PGM5P2;phosphoglucomutase 5 pseudogene 2	PGM5P2
80150	4.377062182	2.542907664	6.568316288	7.46E-05	0.001232903	1.954716888	ASRGL1;asparaginase like 1	ASRGL1
8647	-4.262069134	1.436584989	-6.563272885	7.51E-05	0.001239554	2.005771021	ABCB11;ATP-binding cassette, sub-family B (MDR/TAP), member 11	ABCB11
23544	-4.432473313	1.42358421	-6.558184701	7.56E-05	0.001246728	1.991295108	SEZ6L;seizure related 6 homolog (mouse)-like	SEZ6L
55229	-5.070847118	1.340702374	-6.557914256	7.56E-05	0.001246728	1.964929892	PANK4;pantothenate kinase 4	PANK4
727957	-3.361998825	0.998973472	-6.553564257	7.60E-05	0.0012524	1.924950445	MROH1;maestro heat-like repeat family member 1	MROH1
9730	3.673750711	6.929007281	6.54033376	7.72E-05	0.001269375	1.989987136	VPRBP;Vpr (HIV-1) binding protein	VPRBP
80067	3.830252201	1.151405639	6.534309097	7.78E-05	0.001278291	1.927496862	DCAF17;DDB1 and CUL4 associated factor 17	DCAF17
8464	7.369013997	6.075923469	6.52123298	7.91E-05	0.001297967	1.878548481	SUPT3H;suppressor of Ty 3 homolog (S. cerevisiae)	SUPT3H
801	7.397501385	4.593111174	6.511847108	8.00E-05	0.001312003	1.882727258	CALM1;calmodulin 1 (phosphorylase kinase, delta)	CALM1
388468	-3.793450455	0.595403566	-6.50785143	8.04E-05	0.001317953	1.880570064	POTEC;POTE ankyrin domain family, member C	POTEC
65220	3.722469268	2.623305746	6.49826438	8.13E-05	0.001332036	1.86855852	NADK;NAD kinase	NADK
119032	4.478293713	2.48029691	6.491633524	8.20E-05	0.001341914	1.840321094	C10orf32;chromosome 10 open reading frame 32	C10orf32
51371	5.781570018	2.10809857	6.485886457	8.26E-05	0.001349346	1.847442712	POMP;proteasome maturation protein	POMP
84878	4.306867868	1.869308765	6.484095817	8.28E-05	0.001351477	1.883299925	ZBTB45;zinc finger and BTB domain containing 45	ZBTB45
201475	3.401358682	0.331572052	6.483973923	8.28E-05	0.001351477	1.863202207	RAB12;RAB12, member RAS oncogene family	RAB12
151295	-3.059597039	0.480037983	-6.480622631	8.31E-05	0.001356019	1.865193595	SLC23A3;solute carrier family 23, member 3	SLC23A3
2876	3.138132256	2.930561274	6.476420216	8.36E-05	0.001362009	1.900147313	GPX1;glutathione peroxidase 1	GPX1
1292	-4.846362122	2.472267735	-6.473791904	8.38E-05	0.001365904	1.861870474	COL6A2;collagen, type VI, alpha 2	COL6A2
91252	-3.588910236	0.685309094	-6.469591583	8.43E-05	0.001372475	1.891834466	SLC39A13;solute carrier family 39 (zinc transporter), member 13	SLC39A13
1870	-5.774387148	1.338978647	-6.46896164	8.43E-05	0.001372475	1.832909018	E2F2;E2F transcription factor 2	E2F2
353116	4.049417459	4.574660325	6.448666979	8.65E-05	0.00140463	1.867914559	RILPL1;Rab interacting lysosomal protein-like 1	RILPL1
347517	5.356618265	1.135256735	6.448186999	8.65E-05	0.001404919	1.829524294	RAB41;RAB41, member RAS oncogene family	RAB41
79863	-4.727591759	1.174980974	-6.44772322	8.66E-05	0.00140496	1.810571842	RBFA;ribosome binding factor A (putative)	RBFA
64710	7.064776756	4.397697681	6.44753663	8.66E-05	0.00140496	1.803594444	NUCKS1;nuclear casein kinase and cyclin-dependent kinase substrate 1	NUCKS1
6323	-5.281858314	1.905860657	-6.440218563	8.74E-05	0.001417205	1.866315685	SCN1A;sodium channel, voltage-gated, type I, alpha subunit	SCN1A
2180	6.752648237	3.914234673	6.43570632	8.79E-05	0.001424601	1.787104752	ACSL1;acyl-CoA synthetase long-chain family member 1	ACSL1
6714	2.938958412	2.75996015	6.434706328	8.80E-05	0.001425816	1.83573513	SRC;SRC proto-oncogene, non-receptor tyrosine kinase	SRC
284119	5.312339044	3.32436196	6.425093479	8.91E-05	0.001442362	1.769585149	PTRF;polymerase I and transcript release factor	PTRF
125206	3.625927516	5.832616407	6.416474747	9.00E-05	0.001456189	1.813598411	SLC5A10;solute carrier family 5 (sodium/sugar cotransporter), member 10	SLC5A10
81562	-4.392095284	0.936410353	-6.411394473	9.06E-05	0.001463804	1.80985312	LMAN2L;lectin, mannose-binding 2-like	LMAN2L
6302	4.260668654	1.396677785	6.411343807	9.06E-05	0.001463804	1.772612176	TSPAN31;tetraspanin 31	TSPAN31
1488	4.188765214	3.017132237	6.406669588	9.11E-05	0.001471766	1.737588704	CTBP2;C-terminal binding protein 2	CTBP2
339855	-4.037683272	1.134506024	-6.39060826	9.30E-05	0.001499743	1.813746366	KY;kyphoscoliosis peptidase	KY
65980	-4.927868949	1.369221205	-6.389168549	9.31E-05	0.001501855	1.786268667	BRD9;bromodomain containing 9	BRD9
100129361	4.695321583	4.434538961	6.385576263	9.35E-05	0.001508011	1.757091627	LOC100129361;chromosome X open reading frame 69-like	LOC100129361
3766	-4.409447996	1.502308112	-6.379296725	9.43E-05	0.001518691	1.802679395	KCNJ10;potassium inwardly-rectifying channel, subfamily J, member 10	KCNJ10
51162	-4.187421833	1.342098206	-6.378749169	9.43E-05	0.001519143	1.792386013	EGFL7;EGF-like-domain, multiple 7	EGFL7
55794	3.856028596	1.181467498	6.377724056	9.45E-05	0.001520501	1.746159402	DDX28;DEAD (Asp-Glu-Ala-Asp) box polypeptide 28	DDX28
100133091	5.218846203	4.423862428	6.373819537	9.49E-05	0.00152675	1.691029392	LOC100133091;uncharacterized LOC100133091	LOC100133091
1271	-4.571005142	0.931781849	-6.373372215	9.50E-05	0.001527015	1.760096567	CNTFR;ciliary neurotrophic factor receptor	CNTFR
256126	4.871961235	2.970824436	6.372790857	9.50E-05	0.001527536	1.705430591	SYCE2;synaptonemal complex central element protein 2	SYCE2
401466	3.977246286	1.451440563	6.360436251	9.65E-05	0.001548307	1.747090196	C8orf59;chromosome 8 open reading frame 59	C8orf59
55700	-2.66345685	2.474021542	-6.358207305	9.68E-05	0.001551435	1.760618624	MAP7D1;MAP7 domain containing 1	MAP7D1
51155	2.610786487	0.750093891	6.357811266	9.68E-05	0.001551609	1.738985786	HN1;hematological and neurological expressed 1	HN1
100288162	5.626466236	5.559908575	6.356778755	9.70E-05	0.001553017	1.674201505	LOC100288162;uncharacterized LOC100288162	LOC100288162
92749	-4.923035234	0.926861009	-6.355917543	9.71E-05	0.001554095	1.677687986	DRC1;dynein regulatory complex subunit 1 homolog (Chlamydomonas)	DRC1
6648	4.926199344	1.544857555	6.354480378	9.72E-05	0.001556293	1.712880902	SOD2;superoxide dismutase 2, mitochondrial	SOD2
490	-4.434850494	1.005440437	-6.350988464	9.77E-05	0.001562505	1.729098821	ATP2B1;ATPase, Ca++ transporting, plasma membrane 1	ATP2B1
280636	2.590210187	0.941516044	6.349321528	9.79E-05	0.001565168	1.692857479	C11orf31;chromosome 11 open reading frame 31	C11orf31
23560	3.600197501	1.246628475	6.348954209	9.79E-05	0.001565288	1.694187662	GTPBP4;GTP binding protein 4	GTPBP4
729359	-4.247097302	1.485039791	-6.346472305	9.82E-05	0.001569556	1.756185124	PLIN4;perilipin 4	PLIN4
79828	4.755416945	3.066302178	6.343259366	9.86E-05	0.001574411	1.663213381	METTL8;methyltransferase like 8	METTL8
6299	-5.12307727	1.008464462	-6.339245491	9.91E-05	0.001581401	1.666641787	SALL1;spalt-like transcription factor 1	SALL1
6327	-4.578480363	1.230586349	-6.330223449	0.000100236	0.001596938	1.709011123	SCN2B;sodium channel, voltage-gated, type II, beta subunit	SCN2B
55024	4.460873095	1.794550381	6.329917455	0.000100274	0.001596942	1.635598329	BANK1;B-cell scaffold protein with ankyrin repeats 1	BANK1
219771	2.192617333	2.099275788	6.322999825	0.000101148	0.001609627	1.676119383	CCNY;cyclin Y	CCNY
51504	5.413346637	3.166427486	6.32222294	0.000101246	0.001610583	1.630212911	TRMT112;tRNA methyltransferase 11-2 homolog (S. cerevisiae)	TRMT112
4176	4.277204927	3.802973198	6.320419576	0.000101476	0.001613617	1.661301063	MCM7;minichromosome maintenance complex component 7	MCM7
221184	-4.512963872	0.978245607	-6.318638652	0.000101703	0.001616612	1.685799728	CPNE2;copine II	CPNE2
157769	5.555045953	2.470902003	6.317970831	0.000101788	0.001617353	1.636157961	FAM91A1;family with sequence similarity 91, member A1	FAM91A1
55157	5.162242362	3.652592454	6.317181286	0.000101889	0.001617727	1.633499423	DARS2;aspartyl-tRNA synthetase 2, mitochondrial	DARS2
5272	-3.280533299	1.048852986	-6.31486	0.000102186	0.001621216	1.709795816	SERPINB9;serpin peptidase inhibitor, clade B (ovalbumin), member 9	SERPINB9
503542	3.914742724	5.000197008	6.305138385	0.000103441	0.001639887	1.686836103	SPRN;shadow of prion protein homolog (zebrafish)	SPRN
100287596	-3.230984411	0.706380527	-6.297221059	0.000104476	0.001655034	1.682942735	DDX11L5;DEAD/H (Asp-Glu-Ala-Asp/His) box helicase 11 like 5	DDX11L5
55262	-5.22529125	1.247196547	-6.289124638	0.000105546	0.001670713	1.620063072	C7orf43;chromosome 7 open reading frame 43	C7orf43
3069	3.324646721	6.646247687	6.279505953	0.000106832	0.001689792	1.593290764	HDLBP;high density lipoprotein binding protein	HDLBP
100303728	4.758152218	6.658137542	6.276420468	0.000107248	0.001695733	1.5844266	SLC25A5-AS1;SLC25A5 antisense RNA 1	SLC25A5-AS1
55744	2.2695018	0.208839264	6.272179399	0.000107823	0.001704178	1.634378848	COA1;cytochrome c oxidase assembly factor 1 homolog (S. cerevisiae)	COA1
25873	2.732947143	0.527455934	6.271430624	0.000107925	0.001705144	1.633431529	RPL36;ribosomal protein L36	RPL36
103910	6.496641535	1.883349556	6.267211281	0.0001085	0.001711044	1.584555741	MYL12B;myosin, light chain 12B, regulatory	MYL12B
124446	3.111085043	0.610135392	6.258511516	0.000109698	0.001727943	1.576779481	TMEM219;transmembrane protein 219	TMEM219
3106	3.668258166	1.452997412	6.25795737	0.000109775	0.001728112	1.616070929	HLA-B;major histocompatibility complex, class I, B	HLA-B
401093	2.705620965	7.06846405	6.251274995	0.000110705	0.001741186	1.540452726	MBNL1-AS1;MBNL1 antisense RNA 1	MBNL1-AS1
5251	-5.324941101	1.689469536	-6.247898747	0.000111179	0.001747973	1.562091001	PHEX;phosphate regulating endopeptidase homolog, X-linked	PHEX
27158	-4.439524722	1.212470357	-6.245900512	0.00011146	0.001751078	1.554925901	NDOR1;NADPH dependent diflavin oxidoreductase 1	NDOR1
10146	6.02672113	2.126348079	6.243175534	0.000111845	0.001755802	1.568397229	G3BP1;GTPase activating protein (SH3 domain) binding protein 1	G3BP1
3556	-5.336896179	1.353439844	-6.237218946	0.000112691	0.001767091	1.536715453	IL1RAP;interleukin 1 receptor accessory protein	IL1RAP
387885	2.106187718	5.007499781	6.234866657	0.000113027	0.001771377	1.622089533	CCDC42B;coiled-coil domain containing 42B	CCDC42B
5689	4.013737936	1.285833696	6.234712569	0.000113049	0.001771377	1.54712747	PSMB1;proteasome (prosome, macropain) subunit, beta type, 1	PSMB1
64855	3.903657424	2.528650301	6.23226734	0.000113399	0.001775538	1.527887741	FAM129B;family with sequence similarity 129, member B	FAM129B
1500	5.87227617	1.843155282	6.231576663	0.000113498	0.001775761	1.552710626	CTNND1;catenin (cadherin-associated protein), delta 1	CTNND1
6154	4.315208077	1.87951641	6.227349338	0.000114107	0.001782625	1.521337653	RPL26;ribosomal protein L26	RPL26
5685	4.959893275	2.873228954	6.226166335	0.000114279	0.001784632	1.510246576	PSMA4;proteasome (prosome, macropain) subunit, alpha type, 4	PSMA4
5832	4.276964107	2.786230963	6.223835246	0.000114617	0.001789242	1.500603483	ALDH18A1;aldehyde dehydrogenase 18 family, member A1	ALDH18A1
196294	4.307156281	0.723133836	6.222760683	0.000114773	0.001791011	1.540644645	IMMP1L;IMP1 inner mitochondrial membrane peptidase-like (S. cerevisiae)	IMMP1L
9320	6.276580059	4.805116909	6.219174264	0.000115296	0.0017985	1.499768003	TRIP12;thyroid hormone receptor interactor 12	TRIP12
9167	5.914955852	1.716973836	6.21745866	0.000115547	0.001801744	1.530827119	COX7A2L;cytochrome c oxidase subunit VIIa polypeptide 2 like	COX7A2L
7561	4.754264933	0.921945434	6.215731489	0.0001158	0.001805021	1.528722963	ZNF14;zinc finger protein 14	ZNF14
10721	-4.730038945	1.388965761	-6.207581676	0.000117004	0.001823101	1.505645453	POLQ;polymerase (DNA directed), theta	POLQ
23008	5.056483881	3.114787089	6.204097016	0.000117522	0.001830501	1.48539499	KLHDC10;kelch domain containing 10	KLHDC10
348801	4.171532656	2.090337275	6.198432244	0.000118371	0.001843032	1.4651163	LNP1;leukemia NUP98 fusion partner 1	LNP1
57456	4.744334314	3.249935487	6.193620582	0.000119097	0.001852266	1.465872463	KIAA1143;KIAA1143	KIAA1143
140733	3.682002935	1.367749258	6.192450452	0.000119274	0.001854334	1.505271451	MACROD2;MACRO domain containing 2	MACROD2
1318	3.870788626	1.22829997	6.190735395	0.000119534	0.001857	1.490379245	SLC31A2;solute carrier family 31 (copper transporter), member 2	SLC31A2
643854	4.343020979	1.34663248	6.184560532	0.000120477	0.001870946	1.47282847	CTAGE9;CTAGE family, member 9	CTAGE9
81551	-3.840664748	0.653514295	-6.181339758	0.000120971	0.001877349	1.514332102	STMN4;stathmin-like 4	STMN4
23517	7.970304146	6.104692609	6.177502591	0.000121564	0.001885727	1.437489357	SKIV2L2;superkiller viralicidic activity 2-like 2 (S. cerevisiae)	SKIV2L2
4624	-5.625142493	1.911993221	-6.163121349	0.000123812	0.001917752	1.503996231	MYH6;myosin, heavy chain 6, cardiac muscle, alpha	MYH6
55884	3.313749971	4.01936381	6.162168073	0.000123962	0.001919373	1.556910121	WSB2;WD repeat and SOCS box containing 2	WSB2
9349	6.949105129	2.340820426	6.160039397	0.000124299	0.001923573	1.459554987	RPL23;ribosomal protein L23	RPL23
7020	3.808714361	1.022840156	6.153123023	0.000125401	0.001937346	1.449666916	TFAP2A;transcription factor AP-2 alpha (activating enhancer binding protein 2 alpha)	TFAP2A
6506	-5.272456319	1.660349825	-6.149190221	0.000126032	0.001945659	1.478858755	SLC1A2;solute carrier family 1 (glial high affinity glutamate transporter), member 2	SLC1A2
338094	5.497394408	2.389636183	6.138299001	0.000127798	0.001970012	1.409806288	FAM151A;family with sequence similarity 151, member A	FAM151A
51280	4.031683208	3.952431629	6.136973918	0.000128015	0.001972625	1.400523372	GOLM1;golgi membrane protein 1	GOLM1
242	3.613130973	4.020407551	6.122986823	0.000130326	0.002003832	1.382650442	ALOX12B;arachidonate 12-lipoxygenase, 12R type	ALOX12B
10788	2.961115188	0.826924874	6.122979118	0.000130327	0.002003832	1.438297799	IQGAP2;IQ motif containing GTPase activating protein 2	IQGAP2
26118	4.364940343	0.836218993	6.120710447	0.000130707	0.002008923	1.400990532	WSB1;WD repeat and SOCS box containing 1	WSB1
91369	4.662407199	2.988345241	6.118989682	0.000130995	0.00201238	1.38433905	ANKRD40;ankyrin repeat domain 40	ANKRD40
2863	4.384013536	2.115425518	6.118794053	0.000131028	0.00201238	1.361613828	GPR39;G protein-coupled receptor 39	GPR39
55267	3.758598585	3.195474957	6.113253653	0.000131961	0.002025491	1.409284681	PRR34;proline rich 34	PRR34
7010	-5.407502002	1.228646762	-6.113152427	0.000131978	0.002025491	1.383825515	TEK;TEK tyrosine kinase, endothelial	TEK
3000	2.996889291	2.529950871	6.112196546	0.00013214	0.002027109	1.361622103	GUCY2D;guanylate cyclase 2D, membrane (retina-specific)	GUCY2D
664	5.595625225	3.138615146	6.111957234	0.000132181	0.002027109	1.35553168	BNIP3;BCL2/adenovirus E1B 19kDa interacting protein 3	BNIP3
162632	-3.657418987	0.710202727	-6.1104752	0.000132432	0.002030022	1.432993802	USP32P1;ubiquitin specific peptidase 32 pseudogene 1	USP32P1
6633	3.919279526	1.784514398	6.110264744	0.000132468	0.002030022	1.369207233	SNRPD2;small nuclear ribonucleoprotein D2 polypeptide 16.5kDa	SNRPD2
23345	-5.602759018	2.582169408	-6.10852811	0.000132763	0.002033265	1.435682579	SYNE1;spectrin repeat containing, nuclear envelope 1	SYNE1
51372	4.35398936	0.755099997	6.107484735	0.000132941	0.002035034	1.389302695	TMA7;translation machinery associated 7 homolog (S. cerevisiae)	TMA7
752014	3.373904746	6.049317853	6.101850591	0.000133905	0.002048295	1.397407169	CEMP1;cementum protein 1	CEMP1
4289	3.545936884	2.633379735	6.101356989	0.00013399	0.002048843	1.370405075	MKLN1;muskelin 1, intracellular mediator containing kelch motifs	MKLN1
902	3.727771991	1.345967237	6.094800221	0.000135122	0.002063379	1.33722389	CCNH;cyclin H	CCNH
58527	4.798217568	0.849687638	6.094710859	0.000135138	0.002063379	1.373591802	ABRACL;ABRA C-terminal like	ABRACL
388939	-5.138704822	3.275925134	-6.089460037	0.000136052	0.002075826	1.321737022	C2orf71;chromosome 2 open reading frame 71	C2orf71
10000	5.977508494	5.196191085	6.089175909	0.000136102	0.002075826	1.335399634	AKT3;v-akt murine thymoma viral oncogene homolog 3	AKT3
342096	-2.812078274	0.309152477	-6.084767276	0.000136875	0.002085339	1.387206325	GOLGA6A;golgin A6 family, member A	GOLGA6A
27183	3.048244527	6.182353202	6.082396205	0.000137293	0.002090943	1.404194991	VPS4A;vacuolar protein sorting 4 homolog A (S. cerevisiae)	VPS4A
239	5.022127668	3.493622482	6.080952128	0.000137548	0.002094066	1.310475994	ALOX12;arachidonate 12-lipoxygenase	ALOX12
140775	5.056399018	2.936554197	6.072771023	0.000139003	0.002114681	1.303872085	SMCR8;Smith-Magenis syndrome chromosome region, candidate 8	SMCR8
89778	4.17792836	1.418374138	6.067431572	0.000139962	0.002127192	1.347381261	SERPINB11;serpin peptidase inhibitor, clade B (ovalbumin), member 11 (gene/pseudogene)	SERPINB11
4677	5.717297005	2.258060412	6.067341639	0.000139978	0.002127192	1.307592817	NARS;asparaginyl-tRNA synthetase	NARS
2099	-4.916753634	1.541063337	-6.061954765	0.000140953	0.002141224	1.366836358	ESR1;estrogen receptor 1	ESR1
5238	6.285965908	4.967071863	6.059098133	0.000141473	0.00214834	1.288080933	PGM3;phosphoglucomutase 3	PGM3
10983	5.289697776	2.321790993	6.047186951	0.000143662	0.002177712	1.323747814	CCNI;cyclin I	CCNI
1611	4.831348479	0.975964739	6.045605835	0.000143956	0.002181297	1.276123214	DAP;death-associated protein	DAP
6152	6.23046539	3.418904119	6.04308596	0.000144425	0.002187611	1.260423185	RPL24;ribosomal protein L24	RPL24
3990	-4.381591538	0.894398856	-6.041218294	0.000144774	0.002192024	1.330052475	LIPC;lipase, hepatic	LIPC
3295	6.803559799	3.959821222	6.040963965	0.000144821	0.002192024	1.262461298	HSD17B4;hydroxysteroid (17-beta) dehydrogenase 4	HSD17B4
8653	5.129187334	1.088298176	6.0378655	0.000145402	0.002198807	1.286833674	DDX3Y;DEAD (Asp-Glu-Ala-Asp) box helicase 3, Y-linked	DDX3Y
653720	-2.617759111	0.916737111	-6.037731134	0.000145427	0.002198807	1.359245915	GOLGA8M;golgin A8 family, member M	GOLGA8M
84820	4.179951209	7.320069642	6.037358905	0.000145497	0.00219907	1.33093817	POLR2J4;polymerase (RNA) II (DNA directed) polypeptide J4, pseudogene	POLR2J4
11317	-4.750053001	1.064919844	-6.028181704	0.000147233	0.00222187	1.31504446	RBPJL;recombination signal binding protein for immunoglobulin kappa J region-like	RBPJL
147968	4.205691068	6.148388565	6.027921957	0.000147282	0.00222187	1.309699943	CAPN12;calpain 12	CAPN12
2137	-2.7955321	1.425367149	-6.027700943	0.000147324	0.00222187	1.367348115	EXTL3;exostosin-like glycosyltransferase 3	EXTL3
55867	-4.32393676	1.434861375	-6.024738429	0.00014789	0.002228791	1.293834084	SLC22A11;solute carrier family 22 (organic anion/urate transporter), member 11	SLC22A11
29855	5.214650899	4.170658571	6.022034459	0.000148408	0.002234989	1.244174406	UBN1;ubinuclein 1	UBN1
10121	4.635386803	3.197162777	6.021184593	0.000148571	0.002236643	1.234437386	ACTR1A;ARP1 actin-related protein 1 homolog A, centractin alpha (yeast)	ACTR1A
4660	4.152428797	2.611745521	6.017903294	0.000149203	0.00224517	1.230675098	PPP1R12B;protein phosphatase 1, regulatory subunit 12B	PPP1R12B
27429	3.662386651	2.80621543	6.017409987	0.000149299	0.00224517	1.231743586	HTRA2;HtrA serine peptidase 2	HTRA2
83596	5.088351073	4.305830987	6.016445933	0.000149485	0.002247165	1.263677133	BCL2L12;BCL2-like 12 (proline rich)	BCL2L12
5695	7.284768024	6.446633454	6.009836294	0.00015077	0.002264039	1.216943913	PSMB7;proteasome (prosome, macropain) subunit, beta type, 7	PSMB7
11171	5.31638146	1.71241526	5.996631953	0.000153373	0.002300645	1.24692144	STRAP;serine/threonine kinase receptor associated protein	STRAP
57459	4.203739501	3.024195515	5.991879192	0.000154321	0.002313216	1.200154753	GATAD2B;GATA zinc finger domain containing 2B	GATAD2B
389549	-5.09740674	1.203130112	-5.989531406	0.000154792	0.002319444	1.219492329	FEZF1;FEZ family zinc finger 1	FEZF1
9771	-4.338616621	1.57083593	-5.988429998	0.000155014	0.002321931	1.259087287	RAPGEF5;Rap guanine nucleotide exchange factor (GEF) 5	RAPGEF5
100129973	4.257174892	5.888025636	5.987206395	0.00015526	0.00232479	1.277340072	LOC100129973;uncharacterized LOC100129973	LOC100129973
10379	4.295652373	0.777141549	5.984332316	0.000155841	0.00233227	1.225628314	IRF9;interferon regulatory factor 9	IRF9
5620	4.123365422	1.130791809	5.984181313	0.000155871	0.00233227	1.195973376	PRM2;protamine 2	PRM2
10016	3.417000936	1.001430375	5.981668212	0.000156381	0.002337308	1.233609462	PDCD6;programmed cell death 6	PDCD6
158055	4.947012844	3.622858325	5.981629752	0.000156389	0.002337308	1.196255291	C9orf163;chromosome 9 open reading frame 163	C9orf163
344967	5.239426255	3.408986839	5.981615533	0.000156392	0.002337308	1.178527397	LOC344967;acyl-CoA thioesterase 7 pseudogene	LOC344967
10735	5.51202628	3.394910637	5.98141911	0.000156432	0.002337308	1.188935626	STAG2;stromal antigen 2	STAG2
64101	-3.908397137	0.767041897	-5.977015114	0.000157329	0.002349044	1.25304555	LRRC4;leucine rich repeat containing 4	LRRC4
10135	6.473838961	4.018878446	5.97616927	0.000157502	0.002350788	1.196430645	NAMPT;nicotinamide phosphoribosyltransferase	NAMPT
84268	7.954988627	6.331744635	5.975650741	0.000157609	0.002351534	1.230304536	RPAIN;RPA interacting protein	RPAIN
57571	-4.284004019	1.57104704	-5.965869009	0.000159626	0.002379943	1.267095304	CARNS1;carnosine synthase 1	CARNS1
11278	-5.209456042	1.902450713	-5.964373679	0.000159937	0.002382879	1.183870233	KLF12;Kruppel-like factor 12	KLF12
11282	4.450772626	4.262381697	5.960206416	0.000160807	0.002394987	1.167048056	MGAT4B;mannosyl (alpha-1,3-)-glycoprotein beta-1,4-N-acetylglucosaminyltransferase, isozyme B	MGAT4B
4291	-4.393674518	2.685942086	-5.959820573	0.000160888	0.002395338	1.218236026	MLF1;myeloid leukemia factor 1	MLF1
112	-4.910345915	2.148969593	-5.959259663	0.000161006	0.002395744	1.148801233	ADCY6;adenylate cyclase 6	ADCY6
55588	4.512580534	1.282216667	5.95914359	0.00016103	0.002395744	1.19664641	MED29;mediator complex subunit 29	MED29
8932	4.790880652	3.65511779	5.950577987	0.000162837	0.002419184	1.147822737	MBD2;methyl-CpG binding domain protein 2	MBD2
11182	-5.548521457	1.242549726	-5.948119566	0.00016336	0.002426087	1.146127059	SLC2A6;solute carrier family 2 (facilitated glucose transporter), member 6	SLC2A6
389690	-3.828020025	1.407631749	-5.947539666	0.000163483	0.002426654	1.213583205	MROH5;maestro heat-like repeat family member 5	MROH5
26018	-4.133399549	3.47937754	-5.947395659	0.000163514	0.002426654	1.16620119	LRIG1;leucine-rich repeats and immunoglobulin-like domains 1	LRIG1
5189	4.666858847	3.412244039	5.934302207	0.000166331	0.002466711	1.186638345	PEX1;peroxisomal biogenesis factor 1	PEX1
28954	-4.514134323	0.796314389	-5.928747328	0.000167542	0.002483191	1.121853355	REM1;RAS (RAD and GEM)-like GTP-binding 1	REM1
100132417	4.458995745	0.927010175	5.928660045	0.000167561	0.002483191	1.163663017	FCGR1C;Fc fragment of IgG, high affinity Ic, receptor (CD64), pseudogene	FCGR1C
84851	4.150491365	2.294060568	5.927518873	0.000167811	0.002486014	1.105906952	TRIM52;tripartite motif containing 52	TRIM52
271	-3.618963358	0.645203327	-5.925652751	0.000168221	0.002491201	1.177411736	AMPD2;adenosine monophosphate deaminase 2	AMPD2
3921	5.740342746	3.192264867	5.921774203	0.000169075	0.0025015	1.137714468	RPSA;ribosomal protein SA	RPSA
6147	5.738081547	2.596592068	5.919169589	0.000169652	0.00250796	1.112326932	RPL23A;ribosomal protein L23a	RPL23A
118460	3.988487638	1.717060371	5.918843885	0.000169724	0.002508142	1.121857561	EXOSC6;exosome component 6	EXOSC6
60558	4.438236606	2.33471823	5.915737068	0.000170415	0.002515686	1.108510043	GUF1;GUF1 GTPase homolog (S. cerevisiae)	GUF1
1196	-5.106501023	1.035255362	-5.914813785	0.000170621	0.002517838	1.167233589	CLK2;CDC-like kinase 2	CLK2
358	-2.644576779	0.37624317	-5.906852942	0.000172408	0.002540619	1.123967996	AQP1;aquaporin 1 (Colton blood group)	AQP1
5379	4.265110387	0.733705958	5.903012329	0.000173277	0.00255163	1.116509249	PMS2P1;postmeiotic segregation increased 2 pseudogene 1	PMS2P1
176	-5.228818718	2.012690656	-5.901753601	0.000173563	0.002554941	1.145374091	ACAN;aggrecan	ACAN
182	-3.833834009	1.692072075	-5.900622583	0.000173821	0.002556929	1.077832335	JAG1;jagged 1	JAG1
84708	4.482850646	3.046214422	5.89837524	0.000174333	0.002563088	1.083343633	LNX1;ligand of numb-protein X 1, E3 ubiquitin protein ligase	LNX1
64137	-5.505126912	1.358413337	-5.893362389	0.000175482	0.002577746	1.092520885	ABCG4;ATP-binding cassette, sub-family G (WHITE), member 4	ABCG4
8660	3.486000511	2.225031561	5.885282746	0.000177352	0.002603379	1.049600593	IRS2;insulin receptor substrate 2	IRS2
83463	2.830333051	9.462260631	5.878390315	0.000178963	0.002626116	1.065947441	MXD3;MAX dimerization protein 3	MXD3
30836	2.677163858	1.369231956	5.876688347	0.000179364	0.002631068	1.061707954	DNTTIP2;deoxynucleotidyltransferase, terminal, interacting protein 2	DNTTIP2
6527	4.502614602	2.118812503	5.873670186	0.000180076	0.002640593	1.039543916	SLC5A4;solute carrier family 5 (glucose activated ion channel), member 4	SLC5A4
80344	4.350760481	3.986975885	5.873081947	0.000180216	0.002641708	1.084512653	DCAF11;DDB1 and CUL4 associated factor 11	DCAF11
221468	2.524671676	0.310810944	5.869896142	0.000180971	0.00265186	1.110066471	TMEM217;transmembrane protein 217	TMEM217
158880	4.58680271	2.14877906	5.868300754	0.000181351	0.002656496	1.038670697	USP51;ubiquitin specific peptidase 51	USP51
90410	2.856051521	0.914730892	5.859492819	0.000183464	0.002685562	1.071721381	IFT20;intraflagellar transport 20	IFT20
79788	-2.804209223	0.807829382	-5.854104689	0.00018477	0.002703725	1.102064585	ZNF665;zinc finger protein 665	ZNF665
51593	4.576461412	3.222454088	5.851325867	0.000185447	0.002711737	1.009968283	SRRT;serrate, RNA effector molecule	SRRT
5481	4.711842221	1.414936057	5.848710666	0.000186086	0.002719191	1.045683105	PPID;peptidylprolyl isomerase D	PPID
91316	-4.882067768	2.661264489	-5.837463759	0.000188865	0.002753199	0.984795673	GUSBP11;glucuronidase, beta pseudogene 11	GUSBP11
8812	4.138111416	2.729734724	5.825602045	0.000191844	0.002794537	0.976848261	CCNK;cyclin K	CCNK
55007	2.198684211	0.650234244	5.822697434	0.000192581	0.002801535	0.994764273	FAM118A;family with sequence similarity 118, member A	FAM118A
256158	-5.936864599	4.292967926	-5.822653523	0.000192593	0.002801535	0.964704793	HMCN2;hemicentin 2	HMCN2
7429	-4.032279967	1.87790565	-5.822289381	0.000192685	0.002801908	0.978228821	VIL1;villin 1	VIL1
27068	3.186138301	0.989077566	5.821853884	0.000192796	0.002802545	0.984793177	PPA2;pyrophosphatase (inorganic) 2	PPA2
5054	-5.119508753	1.23547288	-5.818384584	0.000193682	0.002813012	1.033000915	SERPINE1;serpin peptidase inhibitor, clade E (nexin, plasminogen activator inhibitor type 1), member 1	SERPINE1
5924	-4.782507711	2.76951423	-5.818242858	0.000193718	0.002813012	0.978917255	RASGRF2;Ras protein-specific guanine nucleotide-releasing factor 2	RASGRF2
84313	2.812474457	1.222307951	5.815594006	0.000194397	0.002821895	0.969592735	VPS25;vacuolar protein sorting 25 homolog (S. cerevisiae)	VPS25
79038	4.874623089	1.697404989	5.814660603	0.000194637	0.002824186	1.004879322	ZFYVE21;zinc finger, FYVE domain containing 21	ZFYVE21
79165	3.430853061	0.390160789	5.813376296	0.000194968	0.002827235	1.017243661	LENG1;leukocyte receptor cluster (LRC) member 1	LENG1
8848	4.941083111	4.480332392	5.805871327	0.000196912	0.002850492	0.985031793	TSC22D1;TSC22 domain family, member 1	TSC22D1
5340	-4.793645822	1.130124823	-5.79200777	0.00020056	0.002900279	0.971105386	PLG;plasminogen	PLG
80218	6.150739309	4.335923105	5.788213059	0.000201571	0.002913891	0.929026741	NAA50;N(alpha)-acetyltransferase 50, NatE catalytic subunit	NAA50
925	-3.63509711	1.087517865	-5.786262429	0.000202093	0.002920425	1.01926732	CD8A;CD8a molecule	CD8A
400579	-3.258252636	0.428692915	-5.784734739	0.000202502	0.002924114	0.934667601	FLJ35934;FLJ35934	FLJ35934
11113	-5.107133279	3.800165971	-5.780881114	0.00020354	0.002936074	0.917136349	CIT;citron rho-interacting serine/threonine kinase	CIT
6170	5.871251039	1.303071504	5.780725411	0.000203582	0.002936074	0.952793399	RPL39;ribosomal protein L39	RPL39
245973	4.231189196	6.915065086	5.780670239	0.000203597	0.002936074	0.940687395	ATP6V1C2;ATPase, H+ transporting, lysosomal 42kDa, V1 subunit C2	ATP6V1C2
22890	4.403650958	1.897854717	5.773697944	0.000205489	0.00296234	0.917310439	ZBTB1;zinc finger and BTB domain containing 1	ZBTB1
56919	-4.0726055	0.708713859	-5.773025841	0.000205672	0.002963962	0.913967534	DHX33;DEAH (Asp-Glu-Ala-His) box polypeptide 33	DHX33
6738	6.383819068	3.7319132	5.760968722	0.000208992	0.003007665	0.891142894	TROVE2;TROVE domain family, member 2	TROVE2
9465	4.630490057	1.598281266	5.760114833	0.00020923	0.003010045	0.934105243	AKAP7;A kinase (PRKA) anchor protein 7	AKAP7
10137	4.724622547	2.461800033	5.759758156	0.000209329	0.003010436	0.897260914	RBM12;RNA binding motif protein 12	RBM12
51329	4.526986046	1.532140494	5.757502672	0.000209958	0.003018438	0.930993238	ARL6IP4;ADP-ribosylation factor-like 6 interacting protein 4	ARL6IP4
11315	6.447701708	2.608360428	5.754860266	0.000210697	0.003026982	0.887181978	PARK7;parkinson protein 7	PARK7
55127	5.235247365	6.729420548	5.747677993	0.00021272	0.003053945	0.87300519	HEATR1;HEAT repeat containing 1	HEATR1
27333	-4.534682237	1.315732549	-5.74462322	0.000213586	0.003065336	0.935926939	GOLIM4;golgi integral membrane protein 4	GOLIM4
5519	5.548922119	4.578601646	5.744024237	0.000213757	0.003066729	0.869226897	PPP2R1B;protein phosphatase 2, regulatory subunit A, beta	PPP2R1B
23157	3.477528629	2.402754861	5.738983037	0.000215196	0.00308527	0.858697688	SEPT6;septin 6	6-Sep
80208	2.525733624	6.235144709	5.738421878	0.000215357	0.003086004	0.953217772	SPG11;spastic paraplegia 11 (autosomal recessive)	SPG11
5992	-4.378293968	1.493083345	-5.738289949	0.000215395	0.003086004	0.937494458	RFX4;regulatory factor X, 4 (influences HLA class II expression)	RFX4
1496	-5.109247717	2.205610253	-5.737891246	0.00021551	0.003086586	0.86038053	CTNNA2;catenin (cadherin-associated protein), alpha 2	CTNNA2
5582	-4.857698603	1.137670377	-5.735461337	0.000216209	0.003093417	0.921880851	PRKCG;protein kinase C, gamma	PRKCG
84221	4.516269985	3.011728178	5.734873805	0.000216378	0.003094176	0.85128644	SPATC1L;spermatogenesis and centriole associated 1-like	SPATC1L
8409	4.004862938	1.468708322	5.734542492	0.000216473	0.003094176	0.883306511	UXT;ubiquitously-expressed, prefoldin-like chaperone	UXT
171019	-4.737217479	1.866840855	-5.732599079	0.000217035	0.003100996	0.88198834	ADAMTS19;ADAM metallopeptidase with thrombospondin type 1 motif, 19	ADAMTS19
84545	4.1924597	6.071182083	5.729703922	0.000217874	0.003111925	0.877310823	MRPL43;mitochondrial ribosomal protein L43	MRPL43
54893	2.605315528	8.121516265	5.721266329	0.00022034	0.003145	0.875418648	MTMR10;myotubularin related protein 10	MTMR10
6092	-4.853123422	1.138197788	-5.718915901	0.000221033	0.003151655	0.898655388	ROBO2;roundabout, axon guidance receptor, homolog 2 (Drosophila)	ROBO2
10345	-5.157504002	1.174578788	-5.717696279	0.000221393	0.003155714	0.846149116	TRDN;triadin	TRDN
23586	4.402367649	1.520499692	5.717234319	0.000221529	0.003155894	0.8718122	DDX58;DEAD (Asp-Glu-Ala-Asp) box polypeptide 58	DDX58
3098	4.689119062	4.124247016	5.717007169	0.000221596	0.003155894	0.849403764	HK1;hexokinase 1	HK1
1875	4.052692761	1.779785604	5.716887982	0.000221632	0.003155894	0.8694196	E2F5;E2F transcription factor 5, p130-binding	E2F5
729252	-3.922837917	1.872631583	-5.715917462	0.000221919	0.003158911	0.913419608	KRT16P1;keratin 16 pseudogene 1	KRT16P1
83643	-4.522034446	1.822608774	-5.715652775	0.000221998	0.003158952	0.925778819	CCDC3;coiled-coil domain containing 3	CCDC3
79946	2.574031083	6.807167615	5.714635766	0.000222299	0.003162169	0.961564624	C10orf95;chromosome 10 open reading frame 95	C10orf95
9217	5.085667562	3.05352653	5.714021722	0.000222482	0.003163687	0.822341117	VAPB;VAMP (vesicle-associated membrane protein)-associated protein B and C	VAPB
43847	-3.830703995	0.866625891	-5.711141486	0.000223339	0.003172701	0.821900332	KLK14;kallikrein-related peptidase 14	KLK14
1803	2.060539181	6.335439157	5.709149959	0.000223934	0.003180018	0.901045898	DPP4;dipeptidyl-peptidase 4	DPP4
93145	-4.0184679	0.736698374	-5.708320651	0.000224183	0.003182464	0.89982981	OLFM2;olfactomedin 2	OLFM2
114819	3.196066172	1.054733891	5.700430045	0.00022656	0.003211074	0.848493784	CROCCP3;ciliary rootlet coiled-coil, rootletin pseudogene 3	CROCCP3
7095	4.989299312	1.772352322	5.700357401	0.000226582	0.003211074	0.846174509	SEC62;SEC62 homolog (S. cerevisiae)	SEC62
23367	5.390917533	3.566477339	5.699358147	0.000226885	0.003214279	0.801943241	LARP1;La ribonucleoprotein domain family, member 1	LARP1
10456	4.876830313	0.880679768	5.695065755	0.000228191	0.003228416	0.821332071	HAX1;HCLS1 associated protein X-1	HAX1
8832	-5.926132648	1.546484652	-5.692676332	0.000228922	0.00323766	0.802909873	CD84;CD84 molecule	CD84
10724	5.973664742	3.908430278	5.691534294	0.000229273	0.003241517	0.790595976	MGEA5;meningioma expressed antigen 5 (hyaluronidase)	MGEA5
23468	5.781959106	4.838515497	5.686539532	0.000230811	0.003259962	0.792878063	CBX5;chromobox homolog 5	CBX5
1953	-5.053134355	1.278221089	-5.676479939	0.000233943	0.003298633	0.77648447	MEGF6;multiple EGF-like-domains 6	MEGF6
1768	-3.709116529	4.765267396	-5.675139235	0.000234364	0.003303454	0.804400576	DNAH6;dynein, axonemal, heavy chain 6	DNAH6
6168	5.583710376	2.312851109	5.673258558	0.000234956	0.00331068	0.776345353	RPL37A;ribosomal protein L37a	RPL37A
729597	2.336806474	2.234123231	5.671156516	0.000235619	0.003318909	0.768483261	SPDYE6;speedy/RINGO cell cycle regulator family member E6	SPDYE6
5037	6.059553879	3.548755931	5.668601934	0.000236428	0.003329182	0.755951862	PEBP1;phosphatidylethanolamine binding protein 1	PEBP1
57092	5.244809072	2.221508755	5.666316648	0.000237155	0.00333716	0.766477376	PCNP;PEST proteolytic signal containing nuclear protein	PCNP
27440	3.189325353	1.071864965	5.665688765	0.000237354	0.00333885	0.753185954	CECR5;cat eye syndrome chromosome region, candidate 5	CECR5
23125	-4.294323152	3.175858354	-5.664827741	0.000237629	0.003340464	0.748602064	CAMTA2;calmodulin binding transcription activator 2	CAMTA2
100132215	3.735033305	4.364731661	5.662322113	0.00023843	0.003349468	0.795739598	LOC100132215;uncharacterized LOC100132215	LOC100132215
140469	-3.504714956	1.270787128	-5.660384609	0.000239051	0.003357066	0.780811229	MYO3B;myosin IIIB	MYO3B
613	-3.999498533	2.013130493	-5.657543199	0.000239965	0.003368771	0.738539025	BCR;breakpoint cluster region	BCR
168544	-5.015071799	1.221392085	-5.652769129	0.000241509	0.003389312	0.737960625	ZNF467;zinc finger protein 467	ZNF467
5518	3.549449232	2.36152751	5.652166447	0.000241705	0.00339092	0.754743791	PPP2R1A;protein phosphatase 2, regulatory subunit A, alpha	PPP2R1A
114932	5.357128655	2.149922273	5.648825628	0.000242793	0.0034039	0.741489716	MRFAP1L1;Morf4 family associated protein 1-like 1	MRFAP1L1
11253	-4.457897343	0.901348028	-5.643310377	0.0002446	0.003426944	0.797262725	MAN1B1;mannosidase, alpha, class 1B, member 1	MAN1B1
221443	4.514754595	0.852421536	5.638989665	0.000246027	0.003445772	0.742181557	OARD1;O-acyl-ADP-ribose deacylase 1	OARD1
79831	4.397507646	3.917184252	5.637768083	0.000246431	0.003450286	0.741972877	KDM8;lysine (K)-specific demethylase 8	KDM8
6134	3.939433833	6.337798683	5.636063353	0.000246998	0.0034559	0.782200638	RPL10;ribosomal protein L10	RPL10
11140	3.790517019	1.417119362	5.632870782	0.000248062	0.003467308	0.763230834	CDC37;cell division cycle 37	CDC37
1200	-5.564028689	1.444181428	-5.632478621	0.000248193	0.00346798	0.720726314	TPP1;tripeptidyl peptidase I	TPP1
84301	4.021761788	2.540836942	5.628785316	0.000249431	0.003480625	0.709548582	DDI2;DNA-damage inducible 1 homolog 2 (S. cerevisiae)	DDI2
23096	-4.139303171	1.333887832	-5.624937913	0.000250727	0.003496384	0.781546933	IQSEC2;IQ motif and Sec7 domain 2	IQSEC2
405	5.109176166	2.67529585	5.617487689	0.000253258	0.003529331	0.690057819	ARNT;aryl hydrocarbon receptor nuclear translocator	ARNT
26099	2.356640116	1.425144716	5.60555431	0.000257371	0.003576551	0.694634039	SZRD1;SUZ RNA binding domain containing 1	SZRD1
55225	4.586663237	2.528042871	5.605421939	0.000257417	0.003576551	0.673768889	RAVER2;ribonucleoprotein, PTB-binding 2	RAVER2
4700	4.395880547	1.495154254	5.602153114	0.000258556	0.00359031	0.717157038	NDUFA6;NADH dehydrogenase (ubiquinone) 1 alpha subcomplex, 6, 14kDa	NDUFA6
100507346	4.832369677	1.668414831	5.602087803	0.000258579	0.00359031	0.700001382	LOC100507346;uncharacterized LOC100507346	LOC100507346
386757	-4.455632219	2.579266916	-5.600938611	0.00025898	0.003593862	0.67514429	SLC6A10P;solute carrier family 6 (neurotransmitter transporter), member 10, pseudogene	SLC6A10P
388335	5.444731423	3.85779653	5.600864699	0.000259006	0.003593862	0.664076304	TMEM220;transmembrane protein 220	TMEM220
26523	2.88665182	3.992007446	5.600406926	0.000259166	0.003594892	0.751524302	AGO1;argonaute RISC catalytic component 1	AGO1
100128285	-4.472216511	0.945503335	-5.596390731	0.000260577	0.00361326	0.686825447	DNM1P35;DNM1 pseudogene 35	DNM1P35
23784	3.86509329	5.046984867	5.593775171	0.0002615	0.00362333	0.65727874	POTEH;POTE ankyrin domain family, member H	POTEH
100129792	7.76338258	5.909199814	5.593596851	0.000261563	0.00362333	0.649865124	CCDC152;coiled-coil domain containing 152	CCDC152
6767	6.095064304	2.909141816	5.589878439	0.000262882	0.003640392	0.671764462	ST13;suppression of tumorigenicity 13 (colon carcinoma) (Hsp70 interacting protein)	ST13
4026	3.547937602	5.525158435	5.585317183	0.000264509	0.003659293	0.713193817	LPP;LIM domain containing preferred translocation partner in lipoma	LPP
54881	4.78272447	2.894216446	5.580560155	0.000266218	0.003680498	0.663977567	TEX10;testis expressed 10	TEX10
55215	5.172571221	3.883881661	5.57846259	0.000266975	0.003688502	0.637449844	FANCI;Fanconi anemia, complementation group I	FANCI
112770	5.34278716	4.033870751	5.5783883	0.000267002	0.003688502	0.641181126	C1orf85;chromosome 1 open reading frame 85	C1orf85
728752	3.896829192	1.223397779	5.578224123	0.000267062	0.003688502	0.634416815	LOC728752;uncharacterized LOC728752	LOC728752
60437	4.320355984	2.412359149	5.577520784	0.000267316	0.003690798	0.703392838	CDH26;cadherin 26	CDH26
6262	-5.419268703	2.76807719	-5.575818776	0.000267933	0.003698096	0.660581817	RYR2;ryanodine receptor 2 (cardiac)	RYR2
92017	-3.352523465	2.177060471	-5.563154097	0.000272573	0.003757172	0.702282908	SNX29;sorting nexin 29	SNX29
169834	-4.495651964	0.899643693	-5.559742668	0.000273837	0.003770873	0.677706138	ZNF883;zinc finger protein 883	ZNF883
5883	3.964742376	7.785364422	5.557014367	0.000274853	0.00378237	0.669645092	RAD9A;RAD9 homolog A (S. pombe)	RAD9A
84501	-3.01659473	0.617880754	-5.552539692	0.000276528	0.003801665	0.686067277	SPIRE2;spire-type actin nucleation factor 2	SPIRE2
401541	4.06466489	5.058629789	5.550337393	0.000277356	0.003811799	0.643654494	CENPP;centromere protein P	CENPP
740	4.031141264	2.677793861	5.549233172	0.000277772	0.003816266	0.592115179	MRPL49;mitochondrial ribosomal protein L49	MRPL49
51645	3.971934184	1.909441966	5.54600955	0.000278991	0.0038305	0.583738283	PPIL1;peptidylprolyl isomerase (cyclophilin)-like 1	PPIL1
5250	5.262808277	1.765458734	5.545633014	0.000279134	0.003831014	0.609731583	SLC25A3;solute carrier family 25 (mitochondrial carrier; phosphate carrier), member 3	SLC25A3
80114	-5.209710059	1.499224431	-5.54542776	0.000279212	0.003831014	0.662664084	BICC1;BicC family RNA binding protein 1	BICC1
794	-4.802105636	1.615388826	-5.536958195	0.000282446	0.003871571	0.664240827	CALB2;calbindin 2	CALB2
112703	4.777556355	3.577324126	5.535031903	0.000283187	0.003880457	0.572159701	FAM71E1;family with sequence similarity 71, member E1	FAM71E1
6559	-4.858567037	1.643101925	-5.534545555	0.000283374	0.003881753	0.653023281	SLC12A3;solute carrier family 12 (sodium/chloride transporter), member 3	SLC12A3
10891	-4.395458762	0.921921615	-5.533572434	0.00028375	0.003885623	0.592806547	PPARGC1A;peroxisome proliferator-activated receptor gamma, coactivator 1 alpha	PPARGC1A
100037417	5.657710756	7.285723178	5.532889421	0.000284013	0.003887963	0.573227315	DDTL;D-dopachrome tautomerase-like	DDTL
51412	-4.898031483	1.673828484	-5.531084123	0.000284712	0.003894001	0.602563088	ACTL6B;actin-like 6B	ACTL6B
7171	4.623778633	2.348132387	5.529400581	0.000285365	0.003901359	0.613732878	TPM4;tropomyosin 4	TPM4
10209	5.8105525	2.328227241	5.529025711	0.000285511	0.003902074	0.612340534	EIF1;eukaryotic translation initiation factor 1	EIF1
8728	-3.922847314	1.461244429	-5.526916039	0.000286332	0.003910741	0.657207171	ADAM19;ADAM metallopeptidase domain 19	ADAM19
29968	4.855432176	2.949509348	5.51907902	0.000289405	0.00395142	0.566562243	PSAT1;phosphoserine aminotransferase 1	PSAT1
23533	-5.308933737	1.337272739	-5.517897044	0.000289871	0.003956497	0.550113742	PIK3R5;phosphoinositide-3-kinase, regulatory subunit 5	PIK3R5
9061	4.861083772	2.030284572	5.517493091	0.000290031	0.003956695	0.562155808	PAPSS1;3'-phosphoadenosine 5'-phosphosulfate synthase 1	PAPSS1
130074	5.527781529	3.636504771	5.517381617	0.000290075	0.003956695	0.559934531	FAM168B;family with sequence similarity 168, member B	FAM168B
56947	4.535648641	2.351946567	5.512588275	0.000291977	0.003978799	0.537035578	MFF;mitochondrial fission factor	MFF
923	-4.903353925	1.452676474	-5.512577453	0.000291981	0.003978799	0.554626663	CD6;CD6 molecule	CD6
54973	4.224972639	4.522689108	5.504584977	0.000295182	0.004018487	0.539723278	CPSF3L;cleavage and polyadenylation specific factor 3-like	CPSF3L
124411	2.505407837	0.837847482	5.502236158	0.000296129	0.004027664	0.577767929	ZNF720;zinc finger protein 720	ZNF720
1376	4.102755712	1.574982086	5.50221617	0.000296137	0.004027664	0.562019097	CPT2;carnitine palmitoyltransferase 2	CPT2
50862	5.437240908	2.728126079	5.500112471	0.000296989	0.004037836	0.536853157	RNF141;ring finger protein 141	RNF141
5601	4.427872259	1.858205306	5.497553311	0.000298029	0.004048023	0.532512531	MAPK9;mitogen-activated protein kinase 9	MAPK9
8668	4.795825584	3.605509847	5.485000138	0.000303185	0.004114053	0.508933977	EIF3I;eukaryotic translation initiation factor 3, subunit I	EIF3I
374378	-5.359030525	1.188087279	-5.483252006	0.000303911	0.004121226	0.501668305	GALNT18;polypeptide N-acetylgalactosaminyltransferase 18	GALNT18
23237	-2.804228584	0.682557614	-5.481164582	0.00030478	0.004130331	0.585651087	ARC;activity-regulated cytoskeleton-associated protein	ARC
6692	6.030545417	6.017648475	5.476411355	0.000306769	0.004151899	0.496792341	SPINT1;serine peptidase inhibitor, Kunitz type 1	SPINT1
821	5.689047897	3.129529331	5.474092578	0.000307744	0.00416375	0.509767863	CANX;calnexin	CANX
6433	3.255029176	1.095814801	5.472943087	0.000308228	0.004168741	0.522085318	SFSWAP;splicing factor, suppressor of white-apricot family	SFSWAP
57448	2.655646884	6.164721168	5.472654104	0.00030835	0.004168741	0.517271863	BIRC6;baculoviral IAP repeat containing 6	BIRC6
284047	-2.452905691	0.337126376	-5.47250904	0.000308412	0.004168741	0.530422137	CCDC144B;coiled-coil domain containing 144B (pseudogene)	CCDC144B
55737	4.81847703	2.093820633	5.470103495	0.000309429	0.004181144	0.495035306	VPS35;vacuolar protein sorting 35 homolog (S. cerevisiae)	VPS35
116496	5.862145687	4.858275263	5.467223566	0.000310652	0.004196314	0.50336967	FAM129A;family with sequence similarity 129, member A	FAM129A
780776	4.735866194	5.748657082	5.463497347	0.000312242	0.00421371	0.545006052	TVP23A;trans-golgi network vesicle protein 23 homolog A (S. cerevisiae)	TVP23A
10393	5.459923794	4.21883311	5.460798845	0.000313399	0.004227959	0.463778737	ANAPC10;anaphase promoting complex subunit 10	ANAPC10
5899	4.918351447	3.333259334	5.456168074	0.000315396	0.004250776	0.481841435	RALB;v-ral simian leukemia viral oncogene homolog B	RALB
54840	3.05697068	0.974655602	5.45532892	0.000315759	0.0042543	0.507263224	APTX;aprataxin	APTX
220	5.218837078	4.837672644	5.452438903	0.000317013	0.004268449	0.461415412	ALDH1A3;aldehyde dehydrogenase 1 family, member A3	ALDH1A3
219931	-4.133570235	1.666536193	-5.448460983	0.000318748	0.004286293	0.492386167	TPCN2;two pore segment channel 2	TPCN2
6990	5.75080722	2.018961807	5.44483968	0.000320337	0.004304886	0.489313979	DYNLT3;dynein, light chain, Tctex-type 3	DYNLT3
146754	-4.696839663	3.048816077	-5.437020517	0.000323796	0.004348577	0.433679395	DNAH2;dynein, axonemal, heavy chain 2	DNAH2
9527	4.220100849	2.553443332	5.436725415	0.000323927	0.004348944	0.459785227	GOSR1;golgi SNAP receptor complex member 1	GOSR1
64168	5.104177885	3.588561385	5.436198528	0.000324162	0.004350697	0.434316037	NECAB1;N-terminal EF-hand calcium binding protein 1	NECAB1
100128569	5.059436643	3.06363575	5.431809447	0.000326123	0.004372815	0.428061939	C19orf71;chromosome 19 open reading frame 71	C19orf71
7127	-5.235238569	1.270491838	-5.43127427	0.000326364	0.004374631	0.430429296	TNFAIP2;tumor necrosis factor, alpha-induced protein 2	TNFAIP2
9415	4.985986209	3.206636483	5.42887572	0.000327442	0.004387678	0.431606108	FADS2;fatty acid desaturase 2	FADS2
29943	-4.823198405	1.341322458	-5.420864356	0.000331071	0.004432049	0.479476326	PADI1;peptidyl arginine deiminase, type I	PADI1
85406	2.523631432	4.247883447	5.420051616	0.000331442	0.004434171	0.503531266	DNAJC14;DnaJ (Hsp40) homolog, subfamily C, member 14	DNAJC14
488	-4.592516582	3.376350057	-5.411593801	0.000335325	0.004481819	0.402772892	ATP2A2;ATPase, Ca++ transporting, cardiac muscle, slow twitch 2	ATP2A2
64856	-3.83269042	0.816925785	-5.400273802	0.000340598	0.004546495	0.424163607	VWA1;von Willebrand factor A domain containing 1	VWA1
134957	3.98844494	2.573408601	5.397466151	0.00034192	0.004562683	0.377512677	STXBP5;syntaxin binding protein 5 (tomosyn)	STXBP5
81789	2.748162207	7.301629662	5.392335585	0.00034435	0.004593639	0.495333416	TIGD6;tigger transposable element derived 6	TIGD6
5985	4.492776003	4.163251362	5.389330969	0.000345781	0.004609794	0.385033931	RFC5;replication factor C (activator 1) 5, 36.5kDa	RFC5
64083	3.021126541	4.406985456	5.388421688	0.000346216	0.004614115	0.468789791	GOLPH3;golgi phosphoprotein 3 (coat-protein)	GOLPH3
59084	4.083995548	1.626513988	5.385502201	0.000347615	0.004631283	0.377025349	ENPP5;ectonucleotide pyrophosphatase/phosphodiesterase 5 (putative)	ENPP5
196993	4.990968821	4.503370262	5.38459864	0.000348049	0.004635591	0.376445714	CT62;cancer/testis antigen 62	CT62
3006	3.653262487	0.483097815	5.382910427	0.000348862	0.004644937	0.397303756	HIST1H1C;histone cluster 1, H1c	HIST1H1C
28990	5.028313159	3.812809422	5.379861189	0.000350335	0.004661584	0.353542045	ASTE1;asteroid homolog 1 (Drosophila)	ASTE1
10282	2.715134956	0.442373779	5.376582599	0.000351926	0.004678296	0.425381456	BET1;Bet1 golgi vesicular membrane trafficking protein	BET1
387	3.957270237	4.219569666	5.375145351	0.000352627	0.004685198	0.412864075	RHOA;ras homolog family member A	RHOA
152273	-4.889846039	3.606046939	-5.375056823	0.00035267	0.004685198	0.350279037	FGD5;FYVE, RhoGEF and PH domain containing 5	FGD5
283358	-3.300891885	0.946689628	-5.368544598	0.000355861	0.004724595	0.421698728	B4GALNT3;beta-1,4-N-acetyl-galactosaminyl transferase 3	B4GALNT3
157	3.484846042	4.324281555	5.367437958	0.000356407	0.004730335	0.456302087	ADRBK2;adrenergic, beta, receptor kinase 2	ADRBK2
29994	5.210272668	3.48990751	5.365649252	0.00035729	0.004739053	0.345334535	BAZ2B;bromodomain adjacent to zinc finger domain, 2B	BAZ2B
159090	4.139437842	2.871878622	5.364665611	0.000357777	0.004744005	0.351191962	FAM122B;family with sequence similarity 122B	FAM122B
399512	2.652972813	8.129264104	5.362494256	0.000358854	0.004755274	0.359199604	SLC25A35;solute carrier family 25, member 35	SLC25A35
55290	4.120117194	1.678170289	5.360722658	0.000359736	0.004765444	0.322565254	BRF2;BRF2, RNA polymerase III transcription initiation factor 50 kDa subunit	BRF2
79633	-4.896439531	1.933187631	-5.359563427	0.000360314	0.00477159	0.332194288	FAT4;FAT atypical cadherin 4	FAT4
55422	5.054382108	1.746503784	5.359234918	0.000360478	0.004772251	0.366552503	ZNF331;zinc finger protein 331	ZNF331
10018	4.309704038	2.659816462	5.356989781	0.000361601	0.004785602	0.364906675	BCL2L11;BCL2-like 11 (apoptosis facilitator)	BCL2L11
7111	2.697698466	5.873549026	5.352579811	0.000363817	0.004810371	0.396034541	TMOD1;tropomodulin 1	TMOD1
80006	2.287478179	0.507928855	5.34654055	0.000366877	0.004843164	0.400034608	TRAPPC13;trafficking protein particle complex 13	TRAPPC13
8625	4.887877605	4.870274055	5.33750815	0.000371504	0.004899607	0.293504024	RFXANK;regulatory factor X-associated ankyrin-containing protein	RFXANK
10494	4.391922644	3.111268075	5.336330719	0.000372111	0.004906076	0.292903849	STK25;serine/threonine kinase 25	STK25
100130331	-5.209938967	1.292931196	-5.33538941	0.000372598	0.004910216	0.291587942	LOC100130331;POTE ankyrin domain family, member F pseudogene	LOC100130331
79856	3.974738831	7.428776673	5.334784619	0.000372911	0.004911974	0.364009337	SNX22;sorting nexin 22	SNX22
22906	4.69346365	3.204546965	5.333080833	0.000373795	0.00492206	0.289259089	TRAK1;trafficking protein, kinesin binding 1	TRAK1
440352	-4.100409526	0.766698141	-5.330058171	0.000375367	0.004941214	0.328735501	SNX29P2;sorting nexin 29 pseudogene 2	SNX29P2
23197	-4.247426882	1.406660418	-5.329591914	0.000375611	0.00494286	0.286678026	FAF2;Fas associated factor family member 2	FAF2
51809	3.957709637	2.599111862	5.32913224	0.00037585	0.004943705	0.282847383	GALNT7;polypeptide N-acetylgalactosaminyltransferase 7	GALNT7
284338	3.274589178	6.323648407	5.325594761	0.000377703	0.004964144	0.366799928	PRR19;proline rich 19	PRR19
10519	3.054127689	7.271510907	5.32427779	0.000378395	0.004971677	0.382633035	CIB1;calcium and integrin binding 1 (calmyrin)	CIB1
31	3.832679223	5.108804392	5.320023207	0.00038064	0.004999318	0.264807641	ACACA;acetyl-CoA carboxylase alpha	ACACA
102724153	-4.205603138	3.979719752	-5.319838621	0.000380738	0.004999318	0.317749827	LOC102724153;uncharacterized LOC102724153	LOC102724153
85495	6.113222735	2.223484184	5.31860389	0.000381392	0.005004768	0.290724541	RPPH1;ribonuclease P RNA component H1	RPPH1
101	-5.168044249	1.870717769	-5.317134393	0.000382172	0.005013435	0.292076361	ADAM8;ADAM metallopeptidase domain 8	ADAM8
6017	3.099337074	0.838896952	5.316471308	0.000382525	0.005014916	0.305753107	RLBP1;retinaldehyde binding protein 1	RLBP1
1655	6.236549444	2.566382096	5.315813826	0.000382875	0.005017933	0.30660891	DDX5;DEAD (Asp-Glu-Ala-Asp) box helicase 5	DDX5
197257	-3.809734979	1.173984819	-5.312613998	0.000384584	0.005037169	0.270232062	LDHD;lactate dehydrogenase D	LDHD
100289574	-4.278202967	1.407601769	-5.311845359	0.000384995	0.005040558	0.334726049	HERC2P4;hect domain and RLD 2 pseudogene 4	HERC2P4
57558	-4.936350202	1.201051599	-5.311680901	0.000385084	0.005040558	0.257651549	USP35;ubiquitin specific peptidase 35	USP35
10206	3.813424445	3.693385862	5.30722374	0.000387481	0.005068761	0.258994683	TRIM13;tripartite motif containing 13	TRIM13
150209	-5.446734525	1.435713188	-5.301920917	0.000390353	0.005104742	0.243746123	AIFM3;apoptosis-inducing factor, mitochondrion-associated, 3	AIFM3
7430	2.783965861	6.93758905	5.299811748	0.000391502	0.005116568	0.237263658	EZR;ezrin	EZR
100288527	-5.682290031	4.022832886	-5.298373925	0.000392288	0.005125229	0.23727335	REXO1L2P;REX1, RNA exonuclease 1 homolog (S. cerevisiae)-like 2 (pseudogene)	REXO1L2P
54543	4.771507369	2.287064525	5.290078484	0.000396852	0.005178619	0.242256632	TOMM7;translocase of outer mitochondrial membrane 7 homolog (yeast)	TOMM7
100130015	4.652108561	6.599075796	5.289249012	0.000397311	0.005182765	0.226838927	URAHP;urate (hydroxyiso-) hydrolase, pseudogene	URAHP
5079	-4.350922139	1.46981449	-5.28657474	0.000398796	0.00519808	0.326763588	PAX5;paired box 5	PAX5
55281	5.580761536	7.718936111	5.280148184	0.00040239	0.005234325	0.215806709	TMEM140;transmembrane protein 140	TMEM140
283870	4.740046861	5.437554196	5.27635392	0.000404528	0.005257232	0.234676168	BRICD5;BRICHOS domain containing 5	BRICD5
79717	5.442745812	2.222565519	5.274440543	0.000405611	0.00526803	0.235841137	PPCS;phosphopantothenoylcysteine synthetase	PPCS
27257	4.132753939	1.655192542	5.269726356	0.000408292	0.00529956	0.200016746	LSM1;LSM1, U6 small nuclear RNA associated	LSM1
10677	4.704661091	3.482095766	5.264000673	0.000411574	0.005336165	0.19410212	AVIL;advillin	AVIL
8545	3.660750089	3.722315572	5.26391631	0.000411623	0.005336165	0.193165002	CGGBP1;CGG triplet repeat binding protein 1	CGGBP1
8852	3.068895895	1.557694606	5.260805393	0.000413418	0.005354459	0.184560145	AKAP4;A kinase (PRKA) anchor protein 4	AKAP4
9778	5.382339606	2.256318587	5.258283908	0.000414879	0.005371722	0.206584918	KIAA0232;KIAA0232	KIAA0232
1431	3.893844805	2.607092304	5.258033399	0.000415025	0.005371942	0.201857683	CS;citrate synthase	CS
5753	-3.350550405	1.172365361	-5.256564288	0.000415879	0.005381334	0.327095046	PTK6;protein tyrosine kinase 6	PTK6
139596	4.004733539	2.033961147	5.25534707	0.000416588	0.005387178	0.215052739	UPRT;uracil phosphoribosyltransferase (FUR1) homolog (S. cerevisiae)	UPRT
284370	4.528559472	1.947010095	5.254079233	0.000417328	0.00539508	0.185790725	ZNF615;zinc finger protein 615	ZNF615
6138	6.319237824	5.785971013	5.252699558	0.000418135	0.005403842	0.180810873	RPL15;ribosomal protein L15	RPL15
100996485	5.675037563	6.201830113	5.252073663	0.000418502	0.00540691	0.190841863	C5orf66;chromosome 5 open reading frame 66	C5orf66
4166	-4.610726638	1.448626636	-5.248793604	0.000420429	0.005426804	0.167122609	CHST6;carbohydrate (N-acetylglucosamine 6-O) sulfotransferase 6	CHST6
1938	4.705310001	5.629908695	5.246579182	0.000421735	0.005441961	0.2164319	EEF2;eukaryotic translation elongation factor 2	EEF2
23168	5.001161457	2.263422722	5.242565043	0.000424115	0.005470974	0.152032019	RTF1;Rtf1, Paf1/RNA polymerase II complex component, homolog (S. cerevisiae)	RTF1
55856	5.908438818	6.481918747	5.23921188	0.000426113	0.005491673	0.149037417	ACOT13;acyl-CoA thioesterase 13	ACOT13
5687	5.337367059	2.257371985	5.233507681	0.000429536	0.005530675	0.155641758	PSMA6;proteasome (prosome, macropain) subunit, alpha type, 6	PSMA6
94009	2.436156575	6.665938011	5.232571968	0.0004301	0.005534856	0.308860193	SERHL;serine hydrolase-like	SERHL
7342	4.190326141	2.357062933	5.230530162	0.000431335	0.005548706	0.134561874	UBP1;upstream binding protein 1 (LBP-1a)	UBP1
56948	3.925109766	6.832798953	5.230243671	0.000431508	0.005549231	0.265001649	SDR39U1;short chain dehydrogenase/reductase family 39U, member 1	SDR39U1
5870	5.266986031	4.300735583	5.229966456	0.000431676	0.005549684	0.146912862	RAB6A;RAB6A, member RAS oncogene family	RAB6A
494115	4.488146705	1.607345463	5.226497745	0.000433783	0.005571635	0.18634138	RBMXL1;RNA binding motif protein, X-linked-like 1	RBMXL1
84838	-5.170438361	1.758826613	-5.226020986	0.000434074	0.005573654	0.134145388	ZNF496;zinc finger protein 496	ZNF496
3005	6.765125024	4.315077325	5.22441619	0.000435053	0.005584514	0.139781412	H1F0;H1 histone family, member 0	H1F0
10664	3.304404873	1.799797225	5.220563041	0.000437414	0.005613098	0.155370414	CTCF;CCCTC-binding factor (zinc finger protein)	CTCF
51378	-2.873371699	1.622014831	-5.220238944	0.000437613	0.005613932	0.217188464	ANGPT4;angiopoietin 4	ANGPT4
79672	-4.377602572	1.657438761	-5.211949181	0.000442742	0.005676244	0.150065626	FN3KRP;fructosamine 3 kinase related protein	FN3KRP
85358	-3.897092648	2.803742376	-5.209450503	0.0004443	0.005694479	0.127849896	SHANK3;SH3 and multiple ankyrin repeat domains 3	SHANK3
4907	3.291804854	1.130499809	5.207608176	0.000445453	0.005707506	0.145076241	NT5E;5'-nucleotidase, ecto (CD73)	NT5E
926	-4.951000121	1.57049161	-5.202727495	0.000448523	0.005741347	0.100555463	CD8B;CD8b molecule	CD8B
55527	3.007178939	3.068030239	5.202536473	0.000448644	0.005741347	0.109365146	FEM1A;fem-1 homolog a (C. elegans)	FEM1A
127687	4.07165596	4.03492071	5.198633298	0.000451116	0.005771215	0.108236748	C1orf122;chromosome 1 open reading frame 122	C1orf122
3712	4.32784384	3.277513345	5.193362473	0.000454477	0.005804398	0.107416561	IVD;isovaleryl-CoA dehydrogenase	IVD
10614	3.976769805	4.454397065	5.188839337	0.000457383	0.00583889	0.166554815	HEXIM1;hexamethylene bis-acetamide inducible 1	HEXIM1
57224	3.41694956	2.514183083	5.18783622	0.00045803	0.005843584	0.082840236	NHSL1;NHS-like 1	NHSL1
79848	3.973521856	1.551713204	5.182209718	0.000461678	0.005886536	0.109094575	CSPP1;centrosome and spindle pole associated protein 1	CSPP1
563	4.873858558	2.987854319	5.180606143	0.000462724	0.00589627	0.062555447	AZGP1;alpha-2-glycoprotein 1, zinc-binding	AZGP1
3308	4.569012688	2.762663161	5.176502064	0.000465411	0.005928705	0.077846511	HSPA4;heat shock 70kDa protein 4	HSPA4
79961	-2.957201288	1.633583934	-5.175532109	0.000466048	0.005934839	0.159930872	DENND2D;DENN/MADD domain containing 2D	DENND2D
27065	3.258598525	1.266593055	5.173200129	0.000467585	0.005950963	0.095762156	NSG1;neuron specific gene family member 1	NSG1
57109	2.950112036	1.466702432	5.166836801	0.000471805	0.005995556	0.061864513	REXO4;REX4, RNA exonuclease 4 homolog (S. cerevisiae)	REXO4
84153	4.764519512	6.870254469	5.165542663	0.000472669	0.006004621	0.093663393	RNASEH2C;ribonuclease H2, subunit C	RNASEH2C
6715	3.103972797	1.399434332	5.161470705	0.000475396	0.006032989	0.047511737	SRD5A1;steroid-5-alpha-reductase, alpha polypeptide 1 (3-oxo-5 alpha-steroid delta 4-dehydrogenase alpha 1)	SRD5A1
10336	2.836651113	5.152189493	5.161357507	0.000475472	0.006032989	0.151847214	PCGF3;polycomb group ring finger 3	PCGF3
9922	-2.196278098	4.976606188	-5.159216292	0.000476914	0.006049441	0.042475487	IQSEC1;IQ motif and Sec7 domain 1	IQSEC1
148398	3.118923524	6.24611405	5.157666986	0.000477959	0.006060868	0.132500924	SAMD11;sterile alpha motif domain containing 11	SAMD11
256949	3.465858912	5.770296423	5.155227967	0.000479611	0.006079964	0.135996942	KANK3;KN motif and ankyrin repeat domains 3	KANK3
7047	5.804546069	4.635102764	5.153722506	0.000480633	0.006091077	0.054145666	TGM4;transglutaminase 4	TGM4
101928525	3.862413294	5.470749811	5.153156218	0.000481018	0.006092429	0.148364987	LOC101928525;uncharacterized LOC101928525	LOC101928525
2332	5.343563257	2.149550857	5.15313729	0.000481031	0.006092429	0.056412464	FMR1;fragile X mental retardation 1	FMR1
5195	-4.737278454	1.705536835	-5.1495074	0.000483508	0.006121197	0.073204	PEX14;peroxisomal biogenesis factor 14	PEX14
23105	-5.67770227	2.188924626	-5.145558036	0.000486218	0.006148814	0.062035078	FSTL4;follistatin-like 4	FSTL4
23120	-3.99536573	1.141684522	-5.14465635	0.000486839	0.006151529	0.038468512	ATP10B;ATPase, class V, type 10B	ATP10B
56924	-3.62509168	2.122173602	-5.134545152	0.000493862	0.006234171	0.013445929	PAK6;p21 protein (Cdc42/Rac)-activated kinase 6	PAK6
79036	3.32367893	1.943128329	5.134233791	0.00049408	0.00623504	0.00659433	KXD1;KxDL motif containing 1	KXD1
100132526	-4.621218013	1.051458849	-5.129363448	0.000497503	0.00627256	0.044553247	FGD5P1;FYVE, RhoGEF and PH domain containing 5 pseudogene 1	FGD5P1
6697	3.815216615	2.766484416	5.125245618	0.000500417	0.006305498	-0.013031387	SPR;sepiapterin reductase (7,8-dihydrobiopterin:NADP+ oxidoreductase)	SPR
10946	4.686634296	3.021376415	5.122197152	0.000502586	0.006329015	-0.002533434	SF3A3;splicing factor 3a, subunit 3, 60kDa	SF3A3
5080	4.667678702	3.122882101	5.121170607	0.000503319	0.006336333	-0.01988567	PAX6;paired box 6	PAX6
27248	5.498471062	5.061199148	5.119575157	0.00050446	0.006348348	-0.01990265	ERLEC1;endoplasmic reticulum lectin 1	ERLEC1
23151	-4.507879828	1.573857711	-5.119411778	0.000504577	0.006348348	0.01673133	GRAMD4;GRAM domain containing 4	GRAMD4
3190	6.696277699	3.057220548	5.117483553	0.00050596	0.006360909	0.006607311	HNRNPK;heterogeneous nuclear ribonucleoprotein K	HNRNPK
11251	-4.936471719	1.46246472	-5.117383778	0.000506032	0.006360909	0.050734812	PTGDR2;prostaglandin D2 receptor 2	PTGDR2
1429	3.272184307	5.320926693	5.11572678	0.000507223	0.006373976	0.067876042	CRYZ;crystallin, zeta (quinone reductase)	CRYZ
23673	4.881743432	2.190223584	5.114399325	0.00050818	0.006384084	-0.018649517	STX12;syntaxin 12	STX12
10241	4.47837715	2.467647966	5.110988468	0.000510648	0.006411236	-0.01760408	CALCOCO2;calcium binding and coiled-coil domain 2	CALCOCO2
6406	4.226449808	1.394266758	5.108851704	0.000512201	0.00642687	0.029347852	SEMG1;semenogelin I	SEMG1
7529	5.997234875	2.439391853	5.104498874	0.000515379	0.006460937	-0.005152326	YWHAB;tyrosine 3-monooxygenase/tryptophan 5-monooxygenase activation protein, beta	YWHAB
9045	5.640549462	1.905764469	5.099605853	0.000518978	0.006503869	-0.010131581	RPL14;ribosomal protein L14	RPL14
522	4.265274268	4.983526649	5.099419573	0.000519115	0.006503869	0.009868422	ATP5J;ATP synthase, H+ transporting, mitochondrial Fo complex, subunit F6	ATP5J
167838	-4.790511754	1.701853954	-5.098600892	0.00051972	0.006509497	-0.016733753	TXLNB;taxilin beta	TXLNB
3200	3.457711997	0.414393145	5.095812427	0.000521786	0.006531458	-0.019975622	HOXA3;homeobox A3	HOXA3
201176	-2.268763458	0.344740711	-5.091254452	0.000525181	0.006570029	-0.012309187	ARHGAP27;Rho GTPase activating protein 27	ARHGAP27
3184	2.562595614	0.517606959	5.088432955	0.000527295	0.006586622	0.010878647	HNRNPD;heterogeneous nuclear ribonucleoprotein D (AU-rich element RNA binding protein 1, 37kDa)	HNRNPD
2079	4.99075034	1.517933174	5.086942567	0.000528415	0.006596674	-0.02740943	ERH;enhancer of rudimentary homolog (Drosophila)	ERH
3915	3.572355732	2.342415425	5.086277745	0.000528916	0.006596786	-0.044726161	LAMC1;laminin, gamma 1 (formerly LAMB2)	LAMC1
55083	-5.124083384	1.771514795	-5.084913322	0.000529945	0.006605907	-0.046379288	KIF26B;kinesin family member 26B	KIF26B
79901	-2.567377498	0.514512775	-5.083988581	0.000530643	0.006612643	0.032459951	CYBRD1;cytochrome b reductase 1	CYBRD1
23467	-4.896531407	1.506725521	-5.082890056	0.000531474	0.006621027	-0.052311861	NPTXR;neuronal pentraxin receptor	NPTXR
5928	3.078626764	6.08171047	5.078530199	0.000534786	0.006658322	-0.076941621	RBBP4;retinoblastoma binding protein 4	RBBP4
123016	4.322639472	2.55955652	5.078268446	0.000534986	0.006658824	-0.087397808	TTC8;tetratricopeptide repeat domain 8	TTC8
3716	2.42291429	4.568373839	5.076471201	0.000536358	0.00666995	-0.055545458	JAK1;Janus kinase 1	JAK1
286046	2.797272477	0.824058563	5.068299868	0.000542645	0.006744122	-0.056753112	XKR6;XK, Kell blood group complex subunit-related family, member 6	XKR6
11224	4.625541843	1.489827918	5.066260416	0.000544227	0.006759759	-0.07422197	RPL35;ribosomal protein L35	RPL35
23118	3.478765284	3.35775902	5.065604184	0.000544737	0.006764084	-0.088125494	TAB2;TGF-beta activated kinase 1/MAP3K7 binding protein 2	TAB2
83872	-5.087690252	5.072412637	-5.065240574	0.000545019	0.006765586	-0.074835785	HMCN1;hemicentin 1	HMCN1
8605	3.616666702	1.504125096	5.060090915	0.000549041	0.006813483	-0.010411614	PLA2G4C;phospholipase A2, group IVC (cytosolic, calcium-independent)	PLA2G4C
5095	4.709469196	2.325092133	5.059218981	0.000549725	0.006819708	-0.113996211	PCCA;propionyl CoA carboxylase, alpha polypeptide	PCCA
10841	-4.691030012	0.976212162	-5.053336469	0.000554364	0.006869347	-0.047666718	FTCD;formimidoyltransferase cyclodeaminase	FTCD
6207	6.101199059	2.155124589	5.052766829	0.000554815	0.006872904	-0.079063302	RPS13;ribosomal protein S13	RPS13
1915	6.991635709	5.721829308	5.051785852	0.000555593	0.006880508	-0.06718951	EEF1A1;eukaryotic translation elongation factor 1 alpha 1	EEF1A1
51347	5.485861377	3.538747376	5.046024492	0.000560188	0.006933304	-0.116810575	TAOK3;TAO kinase 3	TAOK3
22888	-4.097419366	1.447254823	-5.041553772	0.000563782	0.006969529	-0.074989944	UBOX5;U-box domain containing 5	UBOX5
10923	4.500378186	2.048718769	5.040597601	0.000564554	0.006974946	-0.126822112	SUB1;SUB1 homolog (S. cerevisiae)	SUB1
131578	-5.31973136	1.20867151	-5.036013262	0.000568269	0.0070105	-0.144165048	LRRC15;leucine rich repeat containing 15	LRRC15
5577	2.272133017	0.660941934	5.032190596	0.000571388	0.007044816	-0.090499554	PRKAR2B;protein kinase, cAMP-dependent, regulatory, type II, beta	PRKAR2B
23360	3.461747994	2.187652196	5.031598956	0.000571872	0.007048709	-0.134561638	FNBP4;formin binding protein 4	FNBP4
140890	3.54485632	3.74796591	5.02922272	0.000573822	0.007070655	-0.132179087	SREK1;splicing regulatory glutamine/lysine-rich protein 1	SREK1
55571	2.477938759	0.792485275	5.027061254	0.000575601	0.007086318	-0.050505927	CNOT11;CCR4-NOT transcription complex, subunit 11	CNOT11
1723	-3.516975234	1.369647553	-5.025340216	0.000577022	0.007101723	-0.086211227	DHODH;dihydroorotate dehydrogenase (quinone)	DHODH
100132707	3.785876259	0.849704386	5.024762901	0.0005775	0.00710551	-0.144967598	PAXIP1OS;PAXIP1 opposite strand	PAXIP1OS
284018	2.23547323	0.632979319	5.024261236	0.000577915	0.007108528	-0.12889558	C17orf58;chromosome 17 open reading frame 58	C17orf58
1524	-5.144667223	1.24291863	-5.023754774	0.000578335	0.007111598	-0.160300438	CX3CR1;chemokine (C-X3-C motif) receptor 1	CX3CR1
1974	6.736225794	1.669378568	5.022192081	0.000579632	0.007125449	-0.154424639	EIF4A2;eukaryotic translation initiation factor 4A2	EIF4A2
84433	-2.881506772	1.427175393	-5.018347609	0.000582835	0.007160621	-0.139301167	CARD11;caspase recruitment domain family, member 11	CARD11
55540	6.168294798	5.141523948	5.017273445	0.000583734	0.007169553	-0.176510882	IL17RB;interleukin 17 receptor B	IL17RB
553115	4.265137401	1.566407966	5.013827304	0.000586626	0.007202964	-0.134321067	PEF1;penta-EF-hand domain containing 1	PEF1
100507331	2.316240411	7.669948185	5.012448707	0.000587788	0.007215106	-0.158380804	ZSWIM8-AS1;ZSWIM8 antisense RNA 1	ZSWIM8-AS1
64132	-4.09958226	0.915540492	-5.003789885	0.000595139	0.007301056	-0.163249155	XYLT2;xylosyltransferase II	XYLT2
27102	5.956154761	5.270194478	5.002080238	0.000596602	0.007316858	-0.180675439	EIF2AK1;eukaryotic translation initiation factor 2-alpha kinase 1	EIF2AK1
90326	2.842622461	6.740103753	4.992431627	0.000604931	0.007410319	-0.044853785	THAP3;THAP domain containing, apoptosis associated protein 3	THAP3
80212	4.207383062	0.901016616	4.988458278	0.000608397	0.007448415	-0.217451271	CCDC92;coiled-coil domain containing 92	CCDC92
51241	4.786165232	1.821224278	4.986561084	0.00061006	0.007462474	-0.192743776	COX16;COX16 cytochrome c oxidase assembly homolog (S. cerevisiae)	COX16
441478	3.72929471	1.248769648	4.986537011	0.000610081	0.007462474	-0.135822508	NRARP;NOTCH-regulated ankyrin repeat protein	NRARP
10055	3.154624799	1.871093341	4.980355887	0.000615532	0.007515954	-0.219596217	SAE1;SUMO1 activating enzyme subunit 1	SAE1
374868	-5.32227742	1.344783898	-4.974469193	0.000620771	0.007575506	-0.231803283	ATP9B;ATPase, class II, type 9B	ATP9B
100142659	2.944513615	0.880173785	4.972971235	0.000622112	0.00758744	-0.192011447	CTAGE8;CTAGE family, member 8	CTAGE8
9715	-3.473282856	1.205991541	-4.970397756	0.000624422	0.007611183	-0.139856046	FAM131B;family with sequence similarity 131, member B	FAM131B
114971	2.38325523	7.485274114	4.970146985	0.000624648	0.007611716	-0.215251805	PTPMT1;protein tyrosine phosphatase, mitochondrial 1	PTPMT1
1400	2.685990128	5.107009939	4.967903465	0.000626671	0.007629695	-0.124705207	CRMP1;collapsin response mediator protein 1	CRMP1
55004	4.010829551	1.887100521	4.965360337	0.000628972	0.00765254	-0.21743126	LAMTOR1;late endosomal/lysosomal adaptor, MAPK and MTOR activator 1	LAMTOR1
51512	-4.240132022	1.231879324	-4.961673174	0.000632325	0.007689578	-0.214237707	GTSE1;G-2 and S-phase expressed 1	GTSE1
939	5.617460023	5.130296601	4.951689043	0.0006415	0.00778464	-0.270091335	CD27;CD27 molecule	CD27
5352	-3.459398602	0.49501383	-4.950580077	0.000642527	0.007793255	-0.271041461	PLOD2;procollagen-lysine, 2-oxoglutarate 5-dioxygenase 2	PLOD2
9908	6.276846943	4.852192756	4.941326186	0.000651173	0.007888967	-0.274233753	G3BP2;GTPase activating protein (SH3 domain) binding protein 2	G3BP2
5549	-3.683454576	0.739648819	-4.940842459	0.000651629	0.007892197	-0.208569252	PRELP;proline/arginine-rich end leucine-rich repeat protein	PRELP
80012	5.324434812	4.672823388	4.931975722	0.000660036	0.007991704	-0.285663228	PHC3;polyhomeotic homolog 3 (Drosophila)	PHC3
8405	4.789962531	2.271127966	4.930676104	0.000661277	0.008002108	-0.286310704	SPOP;speckle-type POZ protein	SPOP
27243	4.183515687	0.85113621	4.92289224	0.000668768	0.0080834	-0.307039848	CHMP2A;charged multivesicular body protein 2A	CHMP2A
47	6.002396964	4.492197703	4.922656698	0.000668997	0.008083821	-0.31243008	ACLY;ATP citrate lyase	ACLY
79671	-4.293781483	1.536247553	-4.921453418	0.000670163	0.008095577	-0.276871934	NLRX1;NLR family member X1	NLRX1
27159	-4.414779624	1.742432146	-4.919975371	0.000671599	0.008110579	-0.243885193	CHIA;chitinase, acidic	CHIA
7528	2.702217859	4.628422611	4.918107616	0.000673418	0.0081302	-0.193715771	YY1;YY1 transcription factor	YY1
3936	5.664218643	3.170536524	4.917211952	0.000674292	0.008138405	-0.304435967	LCP1;lymphocyte cytosolic protein 1 (L-plastin)	LCP1
56935	5.086264028	1.557749256	4.914170712	0.00067727	0.008169626	-0.314183658	SMCO4;single-pass membrane protein with coiled-coil domains 4	SMCO4
79621	-5.28913659	1.325676408	-4.913940321	0.000677496	0.008169997	-0.324354824	RNASEH2B;ribonuclease H2, subunit B	RNASEH2B
3656	-3.697845578	1.647529702	-4.910231942	0.000681147	0.008206924	-0.242202369	IRAK2;interleukin-1 receptor-associated kinase 2	IRAK2
84311	4.250994739	1.794828277	4.90728625	0.000684062	0.008239673	-0.323107391	MRPL45;mitochondrial ribosomal protein L45	MRPL45
51096	2.297545083	2.926031603	4.905064753	0.000686269	0.008256971	-0.237473797	UTP18;UTP18 small subunit (SSU) processome component homolog (yeast)	UTP18
5705	3.028486329	1.957471842	4.905045995	0.000686288	0.008256971	-0.274199691	PSMC5;proteasome (prosome, macropain) 26S subunit, ATPase, 5	PSMC5
53842	4.344159809	3.103472631	4.903318894	0.000688009	0.0082753	-0.345847248	CLDN22;claudin 22	CLDN22
7167	5.063727633	2.930274022	4.901802659	0.000689524	0.008288754	-0.289986386	TPI1;triosephosphate isomerase 1	TPI1
57786	4.327003072	2.062173157	4.898623195	0.000692712	0.008323393	-0.352037557	RBAK;RB-associated KRAB zinc finger	RBAK
283104	3.679146235	5.744563874	4.898532407	0.000692803	0.008323393	-0.298515247	SBF2-AS1;SBF2 antisense RNA 1	SBF2-AS1
80095	4.098196793	3.11017196	4.895945991	0.000695409	0.008350245	-0.335288582	ZNF606;zinc finger protein 606	ZNF606
9	3.565896838	1.425413526	4.893553343	0.000697829	0.008376549	-0.305086392	NAT1;N-acetyltransferase 1 (arylamine N-acetyltransferase)	NAT1
4736	6.733858519	3.191325611	4.892875247	0.000698516	0.008382394	-0.327253647	RPL10A;ribosomal protein L10a	RPL10A
6632	2.840685584	0.285114345	4.890744199	0.000700681	0.008403552	-0.34438513	SNRPD1;small nuclear ribonucleoprotein D1 polypeptide 16kDa	SNRPD1
285636	4.924827186	1.952618641	4.890231508	0.000701203	0.008407401	-0.31936637	C5orf51;chromosome 5 open reading frame 51	C5orf51
51031	3.865304689	1.742000115	4.887927101	0.000703554	0.00843226	-0.311176165	GLOD4;glyoxalase domain containing 4	GLOD4
54765	5.197606363	2.546454833	4.887804313	0.00070368	0.00843226	-0.347692279	TRIM44;tripartite motif containing 44	TRIM44
23658	3.233577657	1.927251775	4.883255613	0.000708346	0.008478462	-0.352609423	LSM5;LSM5 homolog, U6 small nuclear RNA associated (S. cerevisiae)	LSM5
3141	4.119015511	3.829078036	4.882667495	0.000708952	0.008480858	-0.357689312	HLCS;holocarboxylase synthetase (biotin-(proprionyl-CoA-carboxylase (ATP-hydrolysing)) ligase)	HLCS
301	5.942232215	4.54409117	4.882208718	0.000709425	0.008484088	-0.366732423	ANXA1;annexin A1	ANXA1
4883	5.259650152	3.779898511	4.87956377	0.000712158	0.008509473	-0.381306887	NPR3;natriuretic peptide receptor 3	NPR3
401399	-3.092954462	0.548797171	-4.876090156	0.000715764	0.008550123	-0.34572772	PRRT4;proline-rich transmembrane protein 4	PRRT4
1983	2.775756328	4.475167949	4.875875795	0.000715988	0.008550347	-0.250760219	EIF5;eukaryotic translation initiation factor 5	EIF5
25799	3.452366165	1.228613804	4.870058028	0.000722074	0.00861337	-0.348691403	ZNF324;zinc finger protein 324	ZNF324
8664	5.37756632	2.116212567	4.869943307	0.000722194	0.00861337	-0.351148617	EIF3D;eukaryotic translation initiation factor 3, subunit D	EIF3D
57502	-3.611305542	1.238814239	-4.869913638	0.000722225	0.00861337	-0.281429754	NLGN4X;neuroligin 4, X-linked	NLGN4X
5583	2.127726193	4.077034836	4.86984757	0.000722295	0.00861337	-0.291686657	PRKCH;protein kinase C, eta	PRKCH
79649	-4.903559419	1.638085804	-4.866514771	0.000725807	0.008650324	-0.313537319	MAP7D3;MAP7 domain containing 3	MAP7D3
51032	3.31793151	0.895688196	4.864050157	0.000728416	0.008678948	-0.378426363	CELA2B;chymotrypsin-like elastase family, member 2B	CELA2B
5204	5.601323112	2.47238506	4.861473023	0.000731156	0.008706622	-0.393159654	PFDN5;prefoldin subunit 5	PFDN5
10901	6.581692786	5.797996561	4.860770123	0.000731905	0.00871306	-0.396381266	DHRS4;dehydrogenase/reductase (SDR family) member 4	DHRS4
54535	-4.853783697	1.009678568	-4.853455826	0.000739747	0.008791313	-0.407847709	CCHCR1;coiled-coil alpha-helical rod protein 1	CCHCR1
353174	4.688061178	8.791474498	4.853268301	0.000739949	0.008791313	-0.4046963	ZACN;zinc activated ligand-gated ion channel	ZACN
23279	3.857884926	2.132721264	4.850488235	0.000742955	0.00882207	-0.42529589	NUP160;nucleoporin 160kDa	NUP160
10007	3.730067607	0.472442607	4.848192315	0.000745446	0.00884908	-0.427350977	GNPDA1;glucosamine-6-phosphate deaminase 1	GNPDA1
57484	-3.719946081	1.647731086	-4.846299693	0.000747507	0.008868996	-0.40749963	RNF150;ring finger protein 150	RNF150
2197	5.437117105	1.720770743	4.846261953	0.000747548	0.008868996	-0.390062572	FAU;Finkel-Biskis-Reilly murine sarcoma virus (FBR-MuSV) ubiquitously expressed	FAU
10383	4.520662531	1.034042867	4.844780521	0.000749166	0.008885664	-0.424190222	TUBB4B;tubulin, beta 4B class IVb	TUBB4B
3417	7.251912778	3.271002184	4.837836976	0.000756796	0.008973623	-0.424221892	IDH1;isocitrate dehydrogenase 1 (NADP+), soluble	IDH1
9804	3.376550808	3.045578745	4.833304813	0.000761821	0.009025533	-0.436996907	TOMM20;translocase of outer mitochondrial membrane 20 homolog (yeast)	TOMM20
8226	3.329511353	1.148170734	4.831473303	0.000763862	0.009047149	-0.410376618	HDHD1;haloacid dehalogenase-like hydrolase domain containing 1	HDHD1
51668	3.451146895	0.304474394	4.830729214	0.000764693	0.009054425	-0.453439519	HSPB11;heat shock protein family B (small), member 11	HSPB11
10235	-3.150565739	0.962811127	-4.830133844	0.000765359	0.00905974	-0.358175178	RASGRP2;RAS guanyl releasing protein 2 (calcium and DAG-regulated)	RASGRP2
55603	4.145118546	1.504275597	4.825592315	0.000770455	0.009112332	-0.39556585	FAM46A;family with sequence similarity 46, member A	FAM46A
6519	2.722936113	5.642405995	4.822676559	0.000773746	0.009140917	-0.329941781	SLC3A1;solute carrier family 3 (amino acid transporter heavy chain), member 1	SLC3A1
100170229	3.675578891	7.047663943	4.817879983	0.000779193	0.009197472	-0.316944925	SRRM5;serine/arginine repetitive matrix 5	SRRM5
3329	4.020674077	5.34000151	4.816190907	0.000781121	0.009215025	-0.465453387	HSPD1;heat shock 60kDa protein 1 (chaperonin)	HSPD1
6397	2.272181981	1.632234346	4.812696459	0.000785126	0.009253405	-0.450952807	SEC14L1;SEC14-like 1 (S. cerevisiae)	SEC14L1
132228	5.485196968	5.421689408	4.812580053	0.000785259	0.009253405	-0.482392756	LSMEM2;leucine-rich single-pass membrane protein 2	LSMEM2
51056	4.069025274	0.624857278	4.811177805	0.000786873	0.009267194	-0.475482211	LAP3;leucine aminopeptidase 3	LAP3
158248	-4.994079727	1.257949721	-4.810806209	0.000787301	0.00926893	-0.478914305	TTC16;tetratricopeptide repeat domain 16	TTC16
160851	-4.725747631	2.69247263	-4.808711307	0.000789719	0.009290253	-0.476843521	DGKH;diacylglycerol kinase, eta	DGKH
51237	3.50023517	1.680787246	4.806884298	0.000791835	0.009312521	-0.462780102	MZB1;marginal zone B and B1 cell-specific protein	MZB1
56006	-3.799214144	1.743148456	-4.805074271	0.000793937	0.00932937	-0.484156671	SMG9;SMG9 nonsense mediated mRNA decay factor	SMG9
10521	5.548594388	3.221848573	4.804313667	0.000794822	0.009335668	-0.472701746	DDX17;DEAD (Asp-Glu-Ala-Asp) box helicase 17	DDX17
26994	5.843386402	2.483185446	4.801873879	0.000797668	0.009357436	-0.482777166	RNF11;ring finger protein 11	RNF11
1244	-4.439146479	1.592929068	-4.799549201	0.000800389	0.009384101	-0.466324375	ABCC2;ATP-binding cassette, sub-family C (CFTR/MRP), member 2	ABCC2
124359	3.583553706	1.751689761	4.796650218	0.000803798	0.009418778	-0.492211079	CDYL2;chromodomain protein, Y-like 2	CDYL2
23416	-2.807489573	0.477224527	-4.792245217	0.000809006	0.009474499	-0.492408985	KCNH3;potassium voltage-gated channel, subfamily H (eag-related), member 3	KCNH3
8178	-4.183944951	1.518360192	-4.791385739	0.000810026	0.009483794	-0.408781529	ELL;elongation factor RNA polymerase II	ELL
1445	3.075576389	2.402077193	4.787953098	0.000814115	0.009529001	-0.513819818	CSK;c-src tyrosine kinase	CSK
10733	-5.221334587	1.386358119	-4.78678901	0.000815507	0.00954262	-0.521255465	PLK4;polo-like kinase 4	PLK4
388951	-2.974722522	0.748541069	-4.784028744	0.000818817	0.009575995	-0.457292298	TSPYL6;TSPY-like 6	TSPYL6
56052	4.665224642	5.045682663	4.783072405	0.000819967	0.009584086	-0.51824059	ALG1;ALG1, chitobiosyldiphosphodolichol beta-mannosyltransferase	ALG1
6103	2.145152768	0.642499593	4.782281503	0.00082092	0.00959143	-0.433266675	RPGR;retinitis pigmentosa GTPase regulator	RPGR
79083	2.115392102	7.164466596	4.782169944	0.000821054	0.00959143	-0.511829998	MLPH;melanophilin	MLPH
1770	-2.379259582	5.072052904	-4.781930684	0.000821343	0.00959212	-0.478735735	DNAH9;dynein, axonemal, heavy chain 9	DNAH9
79613	3.446148525	1.414191097	4.781401024	0.000821982	0.009594223	-0.475774069	TANGO6;transport and golgi organization 6 homolog (Drosophila)	TANGO6
283991	3.941291991	1.486540594	4.772564031	0.00083272	0.009701465	-0.542136335	UBALD2;UBA-like domain containing 2	UBALD2
1314	5.302030326	4.264439387	4.771103205	0.00083451	0.009718748	-0.545065546	COPA;coatomer protein complex, subunit alpha	COPA
84328	3.769077876	0.799316562	4.768507026	0.0008377	0.009753188	-0.538428825	LZIC;leucine zipper and CTNNBIP1 domain containing	LZIC
4824	6.784160238	4.691695276	4.768021396	0.000838298	0.009757437	-0.54769228	NKX3-1;NK3 homeobox 1	NKX3-1
79791	-3.990656396	3.244834808	-4.767428841	0.000839029	0.009763223	-0.516651568	FBXO31;F-box protein 31	FBXO31
51762	4.51799994	1.816877531	4.767182703	0.000839332	0.00976404	-0.506721023	RAB8B;RAB8B, member RAS oncogene family	RAB8B
1203	4.461454858	2.16263245	4.766705618	0.000839921	0.00976623	-0.550196931	CLN5;ceroid-lipofuscinosis, neuronal 5	CLN5
23098	4.086966541	4.93158595	4.766102154	0.000840667	0.009771409	-0.536552938	SARM1;sterile alpha and TIR motif containing 1	SARM1
25983	3.843875478	0.722296678	4.760105065	0.000848115	0.009849764	-0.552274483	NGDN;neuroguidin, EIF4E binding protein	NGDN
1345	2.959233574	0.621872553	4.755708274	0.00085362	0.009910945	-0.514525947	COX6C;cytochrome c oxidase subunit VIc	COX6C
3236	2.925737302	1.222672412	4.753480426	0.000856423	0.00994074	-0.572007962	HOXD10;homeobox D10	HOXD10
206426	-2.231617102	0.534477395	-4.749915082	0.000860931	0.009984748	-0.468495151	PIP5K1P1;phosphatidylinositol-4-phosphate 5-kinase, type I, pseudogene 1	PIP5K1P1
4041	-4.274456684	2.83580795	-4.749367983	0.000861625	0.009990025	-0.577619059	LRP5;low density lipoprotein receptor-related protein 5	LRP5
221935	-5.021180919	3.712075219	-4.747774206	0.00086365	0.010010728	-0.574549016	SDK1;sidekick cell adhesion molecule 1	SDK1
101927550	5.475539587	3.665431169	4.746083959	0.000865803	0.010028178	-0.576495453	LOC101927550;uncharacterized LOC101927550	LOC101927550
4697	4.255232831	2.373781015	4.746027683	0.000865875	0.010028178	-0.561443704	NDUFA4;NADH dehydrogenase (ubiquinone) 1 alpha subcomplex, 4, 9kDa	NDUFA4
7135	5.693797133	4.45274757	4.744315258	0.000868062	0.010050728	-0.58160764	TNNI1;troponin I type 1 (skeletal, slow)	TNNI1
84066	-3.749416364	0.615902987	-4.743416925	0.000869212	0.010061255	-0.511583522	TEX35;testis expressed 35	TEX35
55243	-4.156189062	3.2858941	-4.742935588	0.000869829	0.010065608	-0.495983242	KIRREL;kin of IRRE like (Drosophila)	KIRREL
154664	-5.499613304	2.109399555	-4.741370262	0.000871838	0.010086065	-0.499773934	ABCA13;ATP-binding cassette, sub-family A (ABC1), member 13	ABCA13
79762	5.040216189	2.105396682	4.735871576	0.000878934	0.010162538	-0.5822605	C1orf115;chromosome 1 open reading frame 115	C1orf115
3646	6.04864323	3.801282305	4.735493737	0.000879424	0.010165392	-0.593182096	EIF3E;eukaryotic translation initiation factor 3, subunit E	EIF3E
3908	-5.025946398	1.771704457	-4.731946653	0.000884037	0.01021307	-0.519420331	LAMA2;laminin, alpha 2	LAMA2
168455	3.71187021	1.284411514	4.731513113	0.000884603	0.010216782	-0.561943692	CCDC71L;coiled-coil domain containing 71-like	CCDC71L
144363	3.889328341	0.765377278	4.72984962	0.000886776	0.010239061	-0.598017924	LYRM5;LYR motif containing 5	LYRM5
929	4.406411913	3.714490847	4.729282182	0.000887519	0.010244809	-0.515146765	CD14;CD14 molecule	CD14
170463	2.709066071	1.890782463	4.727498903	0.000889858	0.010263307	-0.610148365	SSBP4;single stranded DNA binding protein 4	SSBP4
10734	2.388417997	6.926804587	4.725018341	0.000893122	0.010298114	-0.529044045	STAG3;stromal antigen 3	STAG3
81856	4.343340573	2.717629599	4.724739512	0.00089349	0.010299514	-0.594471144	ZNF611;zinc finger protein 611	ZNF611
57715	4.69327455	3.547330115	4.722705888	0.000896177	0.010327638	-0.615013249	SEMA4G;sema domain, immunoglobulin domain (Ig), transmembrane domain (TM) and short cytoplasmic domain, (semaphorin) 4G	SEMA4G
4622	-5.44671727	1.767905652	-4.719420599	0.000900535	0.010372151	-0.537440805	MYH4;myosin, heavy chain 4, skeletal muscle	MYH4
51386	5.871277853	2.843313107	4.718397242	0.000901897	0.010382931	-0.602706284	EIF3L;eukaryotic translation initiation factor 3, subunit L	EIF3L
9403	3.050803126	0.897604485	4.718344548	0.000901968	0.010382931	-0.56276538	SEP15;15 kDa selenoprotein	15-Sep
6228	5.854732882	4.054984566	4.717393546	0.000903236	0.010388949	-0.617254567	RPS23;ribosomal protein S23	RPS23
10196	2.271906541	1.10996795	4.716056046	0.000905022	0.010400917	-0.548052815	PRMT3;protein arginine methyltransferase 3	PRMT3
9859	-4.105571125	3.830923732	-4.715212108	0.000906152	0.010411034	-0.627835806	CEP170;centrosomal protein 170kDa	CEP170
55695	3.219481752	1.815170742	4.714454048	0.000907167	0.01041984	-0.621004217	NSUN5;NOP2/Sun domain family, member 5	NSUN5
25792	-3.862074293	2.286312189	-4.713304906	0.000908709	0.010434685	-0.608753948	CIZ1;CDKN1A interacting zinc finger protein 1	CIZ1
3021	6.575484573	3.240675641	4.712100041	0.000910329	0.010450414	-0.606220372	H3F3B;H3 histone, family 3B (H3.3B)	H3F3B
57705	-4.304479065	1.478440968	-4.711553497	0.000911064	0.01045599	-0.553038639	WDFY4;WDFY family member 4	WDFY4
55274	5.124617715	4.872487725	4.707575775	0.000916438	0.01050901	-0.630764742	PHF10;PHD finger protein 10	PHF10
84570	-3.712812504	1.444928665	-4.706482414	0.000917921	0.010523131	-0.622031242	COL25A1;collagen, type XXV, alpha 1	COL25A1
57597	-4.668913914	3.7612466	-4.705097945	0.000919803	0.01054181	-0.643476425	BAHCC1;BAH domain and coiled-coil containing 1	BAHCC1
79172	6.315077472	6.027771438	4.704356115	0.000920812	0.010547603	-0.64228642	CENPO;centromere protein O	CENPO
2322	-4.1308729	0.840511408	-4.703666523	0.000921752	0.010552587	-0.621922676	FLT3;fms-related tyrosine kinase 3	FLT3
6181	3.333847039	0.500221378	4.703117037	0.000922502	0.010558279	-0.638014063	RPLP2;ribosomal protein, large, P2	RPLP2
1310	-4.71377731	1.788620833	-4.702098444	0.000923893	0.010571308	-0.613941539	COL19A1;collagen, type XIX, alpha 1	COL19A1
25874	2.488627321	7.138552706	4.699591322	0.000927327	0.010607697	-0.612126857	MPC2;mitochondrial pyruvate carrier 2	MPC2
340252	4.936709562	1.483329072	4.697620286	0.000930036	0.01063287	-0.613944528	ZNF680;zinc finger protein 680	ZNF680
1356	2.002419933	6.23705643	4.696154005	0.000932057	0.010653062	-0.655253747	CP;ceruloplasmin (ferroxidase)	CP
83933	-3.77157898	2.089909543	-4.694854287	0.000933852	0.010666996	-0.584077978	HDAC10;histone deacetylase 10	HDAC10
25804	2.100991385	0.649691164	4.69453313	0.000934296	0.010666996	-0.51292405	LSM4;LSM4 homolog, U6 small nuclear RNA associated (S. cerevisiae)	LSM4
57731	-4.863793048	3.138886032	-4.692835092	0.000936648	0.010688015	-0.663545863	SPTBN4;spectrin, beta, non-erythrocytic 4	SPTBN4
26354	5.228441715	2.058668559	4.688717807	0.000942378	0.01075046	-0.634440732	GNL3;guanine nucleotide binding protein-like 3 (nucleolar)	GNL3
327	3.349606704	2.670331941	4.68325812	0.000950033	0.0108278	-0.584605588	APEH;acylaminoacyl-peptide hydrolase	APEH
80127	6.223016594	7.797743019	4.681969368	0.00095185	0.010843724	-0.674431386	CCDC176;coiled-coil domain containing 176	CCDC176
27086	3.623453563	4.228366509	4.681380106	0.000952682	0.010850245	-0.663807432	FOXP1;forkhead box P1	FOXP1
30009	-3.426380808	1.501070944	-4.680917727	0.000953335	0.010854729	-0.581538397	TBX21;T-box 21	TBX21
9352	3.78624864	1.797526144	4.679090158	0.000955922	0.010878259	-0.679056548	TXNL1;thioredoxin-like 1	TXNL1
6881	3.879304777	1.367044225	4.678579449	0.000956646	0.010883539	-0.643007044	TAF10;TAF10 RNA polymerase II, TATA box binding protein (TBP)-associated factor, 30kDa	TAF10
55924	3.531737705	1.101210551	4.676637611	0.000959405	0.010903064	-0.604975544	FAM212B;family with sequence similarity 212, member B	FAM212B
3718	-4.315575178	1.642867499	-4.67440694	0.000962585	0.010934158	-0.571878466	JAK3;Janus kinase 3	JAK3
9512	4.462774929	1.659319052	4.674351481	0.000962664	0.010934158	-0.650376021	PMPCB;peptidase (mitochondrial processing) beta	PMPCB
54541	3.695844099	1.166508715	4.673755007	0.000963516	0.010940867	-0.676945332	DDIT4;DNA-damage-inducible transcript 4	DDIT4
100652768	4.737602815	4.872989991	4.668285089	0.000971369	0.011023939	-0.701002354	LOC100652768;uncharacterized LOC100652768	LOC100652768
56181	3.902921243	1.376009577	4.665419325	0.000975511	0.011059051	-0.661893635	MTFR1L;mitochondrial fission regulator 1-like	MTFR1L
55623	5.261662738	1.970128838	4.663577769	0.000978182	0.011083326	-0.685323783	THUMPD1;THUMP domain containing 1	THUMPD1
54868	-2.875635429	0.45136285	-4.660630485	0.000982474	0.011128935	-0.696978637	TMEM104;transmembrane protein 104	TMEM104
3181	6.612300494	4.715865445	4.656467846	0.000988569	0.011187348	-0.704688795	HNRNPA2B1;heterogeneous nuclear ribonucleoprotein A2/B1	HNRNPA2B1
79652	-4.920623502	1.74517405	-4.654551872	0.000991388	0.011211691	-0.681935017	TMEM204;transmembrane protein 204	TMEM204
221785	2.433125978	0.088037219	4.650102948	0.000997967	0.011276945	-0.673168188	ZSCAN25;zinc finger and SCAN domain containing 25	ZSCAN25
54461	-3.090616182	1.405122085	-4.644474608	0.001006357	0.011365607	-0.631773371	FBXW5;F-box and WD repeat domain containing 5	FBXW5
619189	6.209287289	9.181758118	4.64123372	0.001011222	0.011414386	-0.735473657	SERINC4;serine incorporator 4	SERINC4
7390	3.557587996	0.472785067	4.638776466	0.001014927	0.01145003	-0.732378561	UROS;uroporphyrinogen III synthase	UROS
65244	-4.608306617	1.408520894	-4.634355657	0.00102163	0.011516328	-0.669950278	SPATS2;spermatogenesis associated, serine-rich 2	SPATS2
645961	-2.267320628	0.464248167	-4.633969438	0.001022218	0.011519849	-0.683288911	SPATA31C2;SPATA31 subfamily C, member 2	SPATA31C2
123876	-4.747699912	1.142870958	-4.632828667	0.001023956	0.01153633	-0.755506354	ACSM2A;acyl-CoA synthetase medium-chain family member 2A	ACSM2A
4214	-3.503264515	1.945260708	-4.629293399	0.001029363	0.011594125	-0.683602339	MAP3K1;mitogen-activated protein kinase kinase kinase 1, E3 ubiquitin protein ligase	MAP3K1
79188	-5.37844588	1.820970967	-4.625336749	0.00103545	0.011656413	-0.760077577	TMEM43;transmembrane protein 43	TMEM43
498	4.97671726	4.393484786	4.624927533	0.001036082	0.011660387	-0.675563721	ATP5A1;ATP synthase, H+ transporting, mitochondrial F1 complex, alpha subunit 1, cardiac muscle	ATP5A1
4288	-4.618356123	1.59168814	-4.623393866	0.001038454	0.01168079	-0.740330947	MKI67;marker of proliferation Ki-67	MKI67
374655	3.176545078	7.71928478	4.622803586	0.001039368	0.01168793	-0.651674253	ZNF710;zinc finger protein 710	ZNF710
23042	7.085645484	6.206486275	4.62221346	0.001040283	0.011691931	-0.771525255	PDXDC1;pyridoxal-dependent decarboxylase domain containing 1	PDXDC1
10263	-4.976804389	1.742618658	-4.62172677	0.001041038	0.011697275	-0.701501118	CDK2AP2;cyclin-dependent kinase 2 associated protein 2	CDK2AP2
9889	3.797146671	1.73529613	4.614889944	0.001051709	0.011807653	-0.777006103	ZBED4;zinc finger, BED-type containing 4	ZBED4
11188	-4.506568335	1.865836345	-4.612508682	0.001055452	0.011846505	-0.776074708	NISCH;nischarin	NISCH
7498	-4.398652244	1.622484032	-4.611080127	0.001057705	0.011868605	-0.751234031	XDH;xanthine dehydrogenase	XDH
84128	3.973108471	2.148894456	4.609739965	0.001059823	0.011885994	-0.778626245	WDR75;WD repeat domain 75	WDR75
122402	-4.468937559	1.579799697	-4.608625046	0.001061589	0.011896223	-0.706898937	TDRD9;tudor domain containing 9	TDRD9
3092	-4.045748227	1.596459598	-4.608214265	0.00106224	0.011900333	-0.712177304	HIP1;huntingtin interacting protein 1	HIP1
56944	-4.678653545	1.687524718	-4.607987496	0.0010626	0.011901174	-0.778303711	OLFML3;olfactomedin-like 3	OLFML3
9586	-3.736987115	1.235466974	-4.605205071	0.001067024	0.011937937	-0.77849834	CREB5;cAMP responsive element binding protein 5	CREB5
100188893	4.3171711	1.462904499	4.604909399	0.001067495	0.011940015	-0.756023102	TOMM6;translocase of outer mitochondrial membrane 6 homolog (yeast)	TOMM6
8030	5.15768129	3.310679516	4.603492147	0.001069757	0.011962118	-0.791646541	CCDC6;coiled-coil domain containing 6	CCDC6
57018	3.47589672	4.8592914	4.60276989	0.001070912	0.011971829	-0.727679004	CCNL1;cyclin L1	CCNL1
66002	-3.487444048	0.594603765	-4.59976555	0.00107573	0.012012842	-0.795791446	CYP4F12;cytochrome P450, family 4, subfamily F, polypeptide 12	CYP4F12
8971	3.035400504	3.92620247	4.597569839	0.001079265	0.012042677	-0.7199891	H1FX;H1 histone family, member X	H1FX
9153	-3.855128964	0.723595453	-4.595369733	0.00108282	0.012075901	-0.803310754	SLC28A2;solute carrier family 28 (concentrative nucleoside transporter), member 2	SLC28A2
54867	-5.168827698	1.428453231	-4.585805146	0.001098421	0.012221417	-0.821744591	TMEM214;transmembrane protein 214	TMEM214
5048	4.981760853	2.922408557	4.585331979	0.001099199	0.012225954	-0.812342889	PAFAH1B1;platelet-activating factor acetylhydrolase 1b, regulatory subunit 1 (45kDa)	PAFAH1B1
7763	3.331329992	1.238957911	4.584919789	0.001099877	0.012227218	-0.777882061	ZFAND5;zinc finger, AN1-type domain 5	ZFAND5
100288486	-2.707263209	0.365568786	-4.583525996	0.001102173	0.012249266	-0.816113026	DDX11L9;DEAD/H (Asp-Glu-Ala-Asp/His) box helicase 11 like 9	DDX11L9
84167	3.236311753	5.190811817	4.582683028	0.001103565	0.012258215	-0.713494049	C19orf44;chromosome 19 open reading frame 44	C19orf44
112479	5.633729605	5.481290885	4.580868294	0.001106566	0.012288293	-0.832351445	ERI2;ERI1 exoribonuclease family member 2	ERI2
408050	-2.113500595	0.04815169	-4.578043896	0.001111255	0.012337089	-0.823951408	NOMO3;NODAL modulator 3	NOMO3
25897	3.289325107	1.23321326	4.577687553	0.001111849	0.012340398	-0.769579837	RNF19A;ring finger protein 19A, RBR E3 ubiquitin protein ligase	RNF19A
7178	6.183842764	5.538957272	4.576935496	0.001113101	0.012347749	-0.818758741	TPT1;tumor protein, translationally-controlled 1	TPT1
339044	-3.390486453	1.293562727	-4.57634547	0.001114085	0.012352111	-0.840911096	PKD1P1;polycystic kidney disease 1 (autosomal dominant) pseudogene 1	PKD1P1
2775	-3.693781173	1.508417673	-4.575479499	0.001115531	0.012364863	-0.826413644	GNAO1;guanine nucleotide binding protein (G protein), alpha activating activity polypeptide O	GNAO1
6677	-2.018019314	0.334330329	-4.573358003	0.001119082	0.012397646	-0.744087009	SPAM1;sperm adhesion molecule 1 (PH-20 hyaluronidase, zona pellucida binding)	SPAM1
6867	4.28790663	1.550300765	4.572922457	0.001119812	0.012402453	-0.804441284	TACC1;transforming, acidic coiled-coil containing protein 1	TACC1
100130264	-3.015031222	0.386684425	-4.572227522	0.001120979	0.012408799	-0.77902796	LOC100130264;uncharacterized LOC100130264	LOC100130264
27128	-3.299085854	0.656530833	-4.570848483	0.001123297	0.012431174	-0.805300952	CYTH4;cytohesin 4	CYTH4
3875	3.963327784	7.129456194	4.569184588	0.001126101	0.012455616	-0.785664823	KRT18;keratin 18	KRT18
377841	4.562164011	1.667774547	4.568275067	0.001127637	0.012469308	-0.813240472	ENTPD8;ectonucleoside triphosphate diphosphohydrolase 8	ENTPD8
27107	3.243943166	5.157213764	4.567260651	0.001129353	0.01248498	-0.725890939	ZBTB11;zinc finger and BTB domain containing 11	ZBTB11
25798	2.961145319	6.218762475	4.566832027	0.001130079	0.012489702	-0.705527286	BRI3;brain protein I3	BRI3
10954	-3.12301992	0.931036361	-4.566276111	0.001131021	0.012494775	-0.757909451	PDIA5;protein disulfide isomerase family A, member 5	PDIA5
411	4.411078497	3.101968078	4.566208624	0.001131136	0.012494775	-0.849832099	ARSB;arylsulfatase B	ARSB
224	4.788626747	2.081596676	4.564234718	0.001134488	0.012525189	-0.839603111	ALDH3A2;aldehyde dehydrogenase 3 family, member A2	ALDH3A2
7327	4.42827862	2.864580096	4.563038529	0.001136524	0.012531302	-0.854009986	UBE2G2;ubiquitin-conjugating enzyme E2G 2	UBE2G2
55152	2.336954429	7.327582685	4.562830795	0.001136879	0.012531733	-0.77503231	DALRD3;DALR anticodon binding domain containing 3	DALRD3
9826	-3.704687705	4.062397256	-4.55803727	0.001145082	0.012598912	-0.797611144	ARHGEF11;Rho guanine nucleotide exchange factor (GEF) 11	ARHGEF11
9779	3.828055364	1.880999898	4.552601369	0.001154461	0.012695423	-0.854655947	TBC1D5;TBC1 domain family, member 5	TBC1D5
1615	3.976316587	2.10376695	4.552362894	0.001154874	0.01269663	-0.857173059	DARS;aspartyl-tRNA synthetase	DARS
117143	-3.466354421	1.298529575	-4.552009876	0.001155486	0.012700021	-0.767167971	TADA1;transcriptional adaptor 1	TADA1
7170	4.892018097	3.385095619	4.546949943	0.001164298	0.01279015	-0.883211202	TPM3;tropomyosin 3	TPM3
10128	5.048053594	3.561842914	4.543981622	0.0011695	0.012839153	-0.87555892	LRPPRC;leucine-rich pentatricopeptide repeat containing	LRPPRC
8774	4.14365234	2.485470993	4.542790415	0.001171595	0.012853432	-0.872925739	NAPG;N-ethylmaleimide-sensitive factor attachment protein, gamma	NAPG
57579	5.894250211	3.72467371	4.542565108	0.001171992	0.012854411	-0.877465009	FAM135A;family with sequence similarity 135, member A	FAM135A
115701	-4.736230808	1.765193144	-4.541607894	0.001173679	0.012866164	-0.889060966	ALPK2;alpha-kinase 2	ALPK2
7705	3.93891638	2.989387614	4.541058147	0.001174649	0.012873422	-0.871128197	ZNF146;zinc finger protein 146	ZNF146
140453	-4.886708213	3.040156563	-4.535915369	0.001183763	0.012963123	-0.897352036	MUC17;mucin 17, cell surface associated	MUC17
6345	-3.900079517	1.185397863	-4.535410977	0.001184661	0.012969561	-0.857537241	SRL;sarcalumenin	SRL
11098	5.534246436	3.943659709	4.5349888	0.001185414	0.012974399	-0.905909229	PRSS23;protease, serine, 23	PRSS23
26519	2.682552607	0.648137811	4.53463516	0.001186044	0.012977903	-0.883563495	TIMM10;translocase of inner mitochondrial membrane 10 homolog (yeast)	TIMM10
50846	-2.924764256	0.615103477	-4.529939147	0.00119445	0.013063046	-0.901172364	DHH;desert hedgehog	DHH
57683	4.607952979	1.963120364	4.528425411	0.001197173	0.013081112	-0.877523417	ZDBF2;zinc finger, DBF-type containing 2	ZDBF2
10474	3.777347116	7.131995452	4.5283255	0.001197353	0.013081112	-0.845490042	TADA3;transcriptional adaptor 3	TADA3
8703	2.810690544	0.764042311	4.52299478	0.001206997	0.013176143	-0.870169107	B4GALT3;UDP-Gal:betaGlcNAc beta 1,4- galactosyltransferase, polypeptide 3	B4GALT3
6741	3.221757464	4.377820329	4.520281332	0.001211937	0.013223172	-0.835069386	SSB;Sjogren syndrome antigen B (autoantigen La)	SSB
404785	4.67481111	3.803400349	4.519669435	0.001213054	0.013231908	-0.928017006	POTEG;POTE ankyrin domain family, member G	POTEG
55299	2.196798226	0.041079311	4.516374991	0.001219087	0.013283859	-0.834603414	BRIX1;BRX1, biogenesis of ribosomes, homolog (S. cerevisiae)	BRIX1
23019	2.453887183	5.900757714	4.514458187	0.001222612	0.01331533	-0.901623656	CNOT1;CCR4-NOT transcription complex, subunit 1	CNOT1
144348	5.540900702	2.834208739	4.512779874	0.001225707	0.013344094	-0.920908657	ZNF664;zinc finger protein 664	ZNF664
64398	4.883513113	5.415774997	4.512162208	0.001226849	0.013344094	-0.939643066	MPP5;membrane protein, palmitoylated 5 (MAGUK p55 subfamily member 5)	MPP5
11123	5.776372944	4.637029715	4.511407326	0.001228245	0.013352336	-0.941748705	RCAN3;RCAN family member 3	RCAN3
3460	3.563392315	2.480709529	4.510439451	0.001230038	0.01336835	-0.939489346	IFNGR2;interferon gamma receptor 2 (interferon gamma transducer 1)	IFNGR2
55205	4.824811202	4.184289243	4.509535915	0.001231714	0.013383088	-0.937910778	ZNF532;zinc finger protein 532	ZNF532
1832	5.318357133	2.70261283	4.508849678	0.001232988	0.013393457	-0.946813641	DSP;desmoplakin	DSP
9543	-5.103863585	1.71077903	-4.506856706	0.001236698	0.013423294	-0.94305524	IGDCC3;immunoglobulin superfamily, DCC subclass, member 3	IGDCC3
5599	-4.532678551	2.210800692	-4.506223781	0.001237879	0.013432622	-0.842749597	MAPK8;mitogen-activated protein kinase 8	MAPK8
10487	5.250468347	2.536474688	4.504507565	0.001241086	0.013463932	-0.934654329	CAP1;CAP, adenylate cyclase-associated protein 1 (yeast)	CAP1
729786	-2.797667624	0.461456779	-4.503405238	0.001243151	0.013482833	-0.860278862	GOLGA8CP;golgin A8 family, member C, pseudogene	GOLGA8CP
3107	3.868635237	1.448067163	4.502490559	0.001244867	0.013497944	-0.872950564	HLA-C;major histocompatibility complex, class I, C	HLA-C
4147	-2.690893227	0.691567225	-4.49963029	0.001250249	0.013545768	-0.938999304	MATN2;matrilin 2	MATN2
333929	3.071893444	1.287525149	4.498764746	0.001251883	0.013559954	-0.916061716	SNAI3;snail family zinc finger 3	SNAI3
79000	4.043465242	7.611299998	4.498191907	0.001252965	0.013568164	-0.935553538	AUNIP;aurora kinase A and ninein interacting protein	AUNIP
255967	2.774152979	1.987112703	4.497924551	0.001253471	0.013570125	-0.930540856	PAN3;PAN3 poly(A) specific ribonuclease subunit	PAN3
22802	-3.038900732	1.026052076	-4.494493261	0.001259978	0.013637042	-0.873238282	CLCA4;chloride channel accessory 4	CLCA4
286151	-2.638750643	0.475488402	-4.492844419	0.001263117	0.013667487	-0.958522214	FBXO43;F-box protein 43	FBXO43
8886	4.036762129	2.353452397	4.492359376	0.001264043	0.01367396	-0.949120159	DDX18;DEAD (Asp-Glu-Ala-Asp) box polypeptide 18	DDX18
7132	-4.967163951	1.296042908	-4.490878926	0.001266871	0.013693929	-0.968637525	TNFRSF1A;tumor necrosis factor receptor superfamily, member 1A	TNFRSF1A
6586	-5.007594852	2.142605097	-4.486458966	0.001275355	0.013774956	-0.862857574	SLIT3;slit homolog 3 (Drosophila)	SLIT3
1	-5.015978583	1.720368715	-4.481853709	0.001284259	0.013867547	-0.969284482	A1BG;alpha-1-B glycoprotein	A1BG
101926943	4.784721862	7.538174439	4.481578727	0.001284793	0.013869729	-0.887435915	LOC101926943;uncharacterized LOC101926943	LOC101926943
53346	4.666531305	3.841388095	4.481122574	0.001285679	0.013875711	-0.989342806	TM6SF1;transmembrane 6 superfamily member 1	TM6SF1
166752	-4.138967638	2.396238094	-4.479885296	0.001288085	0.013898095	-0.967855575	FREM3;FRAS1 related extracellular matrix 3	FREM3
341640	-4.736558487	2.083211012	-4.477721541	0.001292305	0.013940027	-0.976914233	FREM2;FRAS1 related extracellular matrix protein 2	FREM2
84262	-4.496862778	0.913982453	-4.476417865	0.001294854	0.013960326	-0.991592681	PSMG3;proteasome (prosome, macropain) assembly chaperone 3	PSMG3
26038	-4.921315254	1.947856924	-4.469435646	0.0013086	0.014093989	-0.897987852	CHD5;chromodomain helicase DNA binding protein 5	CHD5
57704	2.87549865	7.048841473	4.467996554	0.001311452	0.014120691	-0.968721534	GBA2;glucosidase, beta (bile acid) 2	GBA2
5885	4.460956352	3.937638285	4.465574292	0.001316268	0.014161988	-0.995601956	RAD21;RAD21 homolog (S. pombe)	RAD21
55693	-4.401965454	0.754103882	-4.459732831	0.001327959	0.01427757	-0.995501593	KDM4D;lysine (K)-specific demethylase 4D	KDM4D
140711	3.82069469	1.482107635	4.459670744	0.001328084	0.01427757	-0.842704405	TLDC2;TBC/LysM-associated domain containing 2	TLDC2
55869	3.820341914	1.341691736	4.459525499	0.001328376	0.01427757	-0.969668596	HDAC8;histone deacetylase 8	HDAC8
54529	4.901369466	1.766610055	4.458795253	0.001329846	0.014289694	-0.986821726	ASNSD1;asparagine synthetase domain containing 1	ASNSD1
55748	4.686672946	4.369364214	4.457051569	0.001333362	0.0143238	-1.012296437	CNDP2;CNDP dipeptidase 2 (metallopeptidase M20 family)	CNDP2
79918	2.552672125	5.969576692	4.456586828	0.001334301	0.014330205	-0.881076993	SETD6;SET domain containing 6	SETD6
101929231	4.937813269	7.279165267	4.455721499	0.001336051	0.014345316	-1.025828824	LOC101929231;uncharacterized LOC101929231	LOC101929231
823	3.843659265	3.306988787	4.45417198	0.001339191	0.014374732	-1.023217926	CAPN1;calpain 1, (mu/I) large subunit	CAPN1
55504	5.128747296	5.627842101	4.453920297	0.001339702	0.014374732	-1.017614612	TNFRSF19;tumor necrosis factor receptor superfamily, member 19	TNFRSF19
10479	-4.463097157	0.836645623	-4.453636276	0.001340279	0.014375941	-1.02843894	SLC9A6;solute carrier family 9, subfamily A (NHE6, cation proton antiporter 6), member 6	SLC9A6
10057	-4.921158203	3.370920369	-4.449845256	0.001348	0.014451353	-1.037937509	ABCC5;ATP-binding cassette, sub-family C (CFTR/MRP), member 5	ABCC5
1021	3.200098635	1.818448259	4.447565497	0.001352667	0.014490234	-1.038039486	CDK6;cyclin-dependent kinase 6	CDK6
170622	3.575658798	1.168898511	4.445623141	0.001356656	0.014529246	-1.003047872	COMMD6;COMM domain containing 6	COMMD6
56623	-5.009921624	1.662208787	-4.444077715	0.001359839	0.014555879	-1.034322465	INPP5E;inositol polyphosphate-5-phosphatase, 72 kDa	INPP5E
7143	-3.0794774	0.933181513	-4.43878163	0.001370807	0.014665773	-0.984927436	TNR;tenascin R	TNR
654817	-3.021593334	0.358749425	-4.437639393	0.001373184	0.014687455	-1.055971853	NCF1C;neutrophil cytosolic factor 1C pseudogene	NCF1C
80185	5.301856442	4.724058338	4.436899503	0.001374727	0.014700194	-1.058178962	TTI2;TELO2 interacting protein 2	TTI2
100131187	2.710019032	1.740526389	4.4336476	0.001381529	0.014765374	-1.063395388	TSTD1;thiosulfate sulfurtransferase (rhodanese)-like domain containing 1	TSTD1
100188954	2.986048067	5.009302874	4.433459571	0.001381923	0.014765815	-0.975981071	DNMBP-AS1;DNMBP antisense RNA 1	DNMBP-AS1
64343	2.633190455	0.656947941	4.433121967	0.001382631	0.014765839	-0.987535912	AZI2;5-azacytidine induced 2	AZI2
202	5.957176911	4.586522519	4.431801642	0.001385405	0.014791688	-1.040371227	AIM1;absent in melanoma 1	AIM1
5611	-3.359397548	2.162829881	-4.431286783	0.001386489	0.014799476	-0.913370522	DNAJC3;DnaJ (Hsp40) homolog, subfamily C, member 3	DNAJC3
11079	4.332667111	7.500127677	4.430627021	0.001387878	0.014810529	-1.017595869	RER1;retention in endoplasmic reticulum sorting receptor 1	RER1
222553	-5.351722349	1.148398025	-4.427264431	0.001394984	0.014880783	-1.069353589	SLC35F1;solute carrier family 35, member F1	SLC35F1
6597	4.049648096	2.676881396	4.427174802	0.001395173	0.014880783	-1.060300967	SMARCA4;SWI/SNF related, matrix associated, actin dependent regulator of chromatin, subfamily a, member 4	SMARCA4
55322	4.331177111	2.972159527	4.42467027	0.001400491	0.014929888	-1.069886732	C5orf22;chromosome 5 open reading frame 22	C5orf22
284434	4.278950701	5.225282228	4.420422641	0.00140956	0.015018905	-1.019767182	NWD1;NACHT and WD repeat domain containing 1	NWD1
8508	3.943164435	2.351117259	4.419734634	0.001411034	0.015026383	-1.074693833	NIPSNAP1;nipsnap homolog 1 (C. elegans)	NIPSNAP1
252969	4.494565095	2.824906043	4.419592378	0.00141134	0.015026383	-1.067537482	NEIL2;nei endonuclease VIII-like 2 (E. coli)	NEIL2
23676	-2.797695702	0.661030779	-4.418356073	0.001413994	0.015050816	-0.986717455	SMPX;small muscle protein, X-linked	SMPX
9589	2.539800921	7.2933926	4.413114571	0.001425308	0.015159667	-0.981830817	WTAP;Wilms tumor 1 associated protein	WTAP
90580	-4.350372655	0.930966078	-4.412611987	0.001426398	0.015167401	-1.018910373	C19orf52;chromosome 19 open reading frame 52	C19orf52
399474	5.662572607	6.299434076	4.410127006	0.0014318	0.015213236	-1.095952558	TMEM200B;transmembrane protein 200B	TMEM200B
286319	2.738190796	7.472820884	4.408244112	0.001435907	0.015253003	-0.965362629	TUSC1;tumor suppressor candidate 1	TUSC1
7052	-4.264239096	2.345332433	-4.406514447	0.001439691	0.015289317	-1.075747608	TGM2;transglutaminase 2	TGM2
550631	2.955745883	5.721336905	4.405872082	0.001441099	0.015300386	-0.970279268	CCDC157;coiled-coil domain containing 157	CCDC157
27141	5.985838025	7.416410394	4.404579059	0.001443938	0.015322745	-1.098419614	CIDEB;cell death-inducing DFFA-like effector b	CIDEB
6189	7.634697975	2.869408714	4.399866471	0.001454335	0.015417422	-1.082419404	RPS3A;ribosomal protein S3A	RPS3A
5452	-4.089365909	1.546167389	-4.398420201	0.001457541	0.015447499	-1.097141211	POU2F2;POU class 2 homeobox 2	POU2F2
5087	4.774647172	2.38245268	4.397831817	0.001458848	0.01545743	-1.103460184	PBX1;pre-B-cell leukemia homeobox 1	PBX1
80762	4.295660827	1.913579453	4.396354628	0.001462134	0.015488323	-1.104815077	NDFIP1;Nedd4 family interacting protein 1	NDFIP1
79834	-4.827652739	1.842699342	-4.391964912	0.001471945	0.015584357	-1.122397432	PEAK1;pseudopodium-enriched atypical kinase 1	PEAK1
221191	2.817072192	5.653361435	4.391785787	0.001472347	0.015584666	-1.009083252	PRSS54;protease, serine, 54	PRSS54
6209	3.235779489	1.624161849	4.391112874	0.001473857	0.015596708	-1.109524013	RPS15;ribosomal protein S15	RPS15
10524	5.830456266	4.893323713	4.389749896	0.001476922	0.015613337	-1.131236262	KAT5;K(lysine) acetyltransferase 5	KAT5
92154	2.037832392	0.593653317	4.385233698	0.001487125	0.015697393	-1.092831431	MTSS1L;metastasis suppressor 1-like	MTSS1L
129642	2.53706859	0.789503447	4.381824845	0.001494876	0.015775227	-1.042450068	MBOAT2;membrane bound O-acyltransferase domain containing 2	MBOAT2
2969	4.651992775	2.022129975	4.379109689	0.001501081	0.015836704	-1.119784935	GTF2I;general transcription factor IIi	GTF2I
11238	2.147139334	0.903980799	4.376996877	0.001505927	0.015879827	-1.130519769	CA5B;carbonic anhydrase VB, mitochondrial	CA5B
80254	2.345031668	7.041275664	4.376580612	0.001506884	0.015885911	-0.99878176	CEP63;centrosomal protein 63kDa	CEP63
2781	-3.885395428	1.542837482	-4.376084317	0.001508026	0.015893941	-1.08218892	GNAZ;guanine nucleotide binding protein (G protein), alpha z polypeptide	GNAZ
142686	3.807659596	3.810681402	4.374550848	0.001511559	0.015923155	-1.137572132	ASB14;ankyrin repeat and SOCS box containing 14	ASB14
9219	3.890813441	2.249959456	4.374087587	0.001512629	0.015926395	-1.135646718	MTA2;metastasis associated 1 family, member 2	MTA2
10951	5.091298575	2.12616643	4.369609843	0.001523004	0.016031604	-1.123383365	CBX1;chromobox homolog 1	CBX1
79644	-4.451117115	1.242754389	-4.366596541	0.001530029	0.01608935	-1.102936605	SRD5A3;steroid 5 alpha-reductase 3	SRD5A3
339745	5.456607767	2.640698798	4.362744532	0.001539059	0.016180239	-1.15852354	SPOPL;speckle-type POZ protein-like	SPOPL
388324	5.380891897	5.682510617	4.361841151	0.001541185	0.016198517	-1.160627164	INCA1;inhibitor of CDK, cyclin A1 interacting protein 1	INCA1
7226	-3.246584561	1.187180348	-4.361141301	0.001542834	0.016211776	-1.12135408	TRPM2;transient receptor potential cation channel, subfamily M, member 2	TRPM2
[truncated: 601 more rows]
