# Supplementary material for: LncRNAs induce oxidative stress and spermatogenesis by regulating endoplasmic reticulum genes and pathways
Source: Aging (Albany NY). 2021 May 6;13(10):13764–87. doi: 10.18632/aging.202971 (PMC8202879; doi:10.18632/aging.202971)
Supplement: Supplementary Table 3 [file aging-13-202971-s003.csv]

Supplementary Table 3. chromosome_lnc_condition.
GeneID	logFC	AveExpr	t	P.Value	adj.P.Val	B	Chr	Strand	Start	End	subgroup	Diff
ADIRF-AS1	6.658751	10.53921	4.225234	0.001901417	0.01932422	-1.389334	chr10	-	88725101	88730583	Antisense	Up
ALKBH3-AS1	3.98566084	0.581832626	9.987578021	2.12E-06	5.83E-05	5.491495891	chr11	-	43930838	43942494	Sense	Up
ARHGEF19-AS1	2.960377291	0.558824781	8.787904768	6.52E-06	0.0001496	4.400501441	chr1	+	16524348	16524852	Antisense	Up
ARSD-AS1	6.772131456	2.396418492	20.31964439	3.04E-09	3.63E-07	11.25531753	chrX	+	2822944	2824122	Intron	Up
ATP6V0E2-AS1	3.933263	7.551829	3.882039	0.003259239	0.03014256	-1.848953	chr7	-	149567386	149606793	Sense	Up
B3GALT5-AS1	-5.411775623	1.325926325	-7.864468898	1.69E-05	0.000340699	3.474413511	chr21	-	40969030	40984994	Sense	Down
BIRC6-AS1	8.712353941	5.051770404	11.64227713	5.36E-07	1.85E-05	6.81025615	chr2	-	32602698	32604667	Antisense	Up
BOLA3-AS1	9.077857712	5.996453721	10.64370861	1.20E-06	3.64E-05	6.052505545	chr2	+	74373929	74382164	Sense	Up
BZRAP1-AS1	5.095316171	1.490928144	8.631547874	7.62E-06	0.000171359	4.25597691	chr17	+	56406298	56493127	Sense	Up
C15orf59-AS1	5.503245306	2.867179305	17.9887843	9.58E-09	7.92E-07	10.23841076	chr15	+	74044452	74065577	Sense	Up
C1RL-AS1	4.985569311	1.191344253	11.92218562	4.32E-07	1.55E-05	6.984071635	chr12	+	7260647	7280929	Sense	Up
CARS-AS1	4.948518	6.039037	4.289609	0.001721665	0.0177826	-1.278773	chr11	+	3050623	3062490	Antisense	Up
CASC15	-7.619995334	3.418826246	-21.43409465	1.83E-09	2.66E-07	11.48752798	chr6	+	21665002	22304028	Sense	Down
CASK-AS1	5.550601694	1.801748284	19.34328439	4.84E-09	4.86E-07	10.79441888	chrX	+	41379288	41381589	Intron	Up
CBR3-AS1	4.312747	4.747665	4.290296	0.001719848	0.01776823	-1.288099	chr21	-	37504064	37528621	Sense	Up
CCDC144NL-AS1	6.619592484	7.300021679	4.931546517	0.000660445	0.007994353	-0.299155255	chr17	+	20771745	20905589	Sense	Up
CFLAR-AS1	8.201968397	3.4204793	29.03658086	1.02E-10	5.68E-08	13.45620113	chr2	-	202005011	202022546	Sense	Up
CHKB-AS1	-4.705749	0.8106232	-3.711052	0.004287289	0.03753374	-2.220349	chr22	+	51021408	51038732	Sense	Down
CNOT10-AS1	6.921966296	2.516218876	21.45471436	1.82E-09	2.66E-07	11.63130302	chr3	-	32772126	32778946	Antisense	Up
COX10-AS1	-4.18756	1.204503	-4.086531	0.00235962	0.02301881	-1.609594	chr17	-	13659794	13972796	Sense	Down
DANT1	-4.429635858	0.878472333	-6.333809739	9.98E-05	0.00159099	1.645183857	chrX	+	114957296	115021470	Intergenic	Down
DCTN1-AS1	5.997683432	4.196377596	4.596410085	0.001081138	0.012060352	-0.811153691	chr2	+	74612612	74622476	Sense	Up
DIO3OS	-4.248915112	0.782048054	-6.231665667	0.000113485	0.001775761	1.531332343	chr14	-	102018557	102026740	Sense	Down
DLG5-AS1	4.80479	3.382768	4.226468	0.00189779	0.01929674	-1.382395	chr10	+	79685981	79689583	Sense	Up
DLGAP4-AS1	5.112543521	6.191893596	8.93641529	5.64E-06	0.00013241	4.549889238	chr20	-	35136104	35201794	Sense	Up
DNAJC9-AS1	6.629187563	1.409775274	11.56702007	5.69E-07	1.95E-05	6.733758428	chr10	+	75008140	75009116	Sense	Up
DNMBP-AS1	5.129868	2.89442	3.765261	0.003928856	0.03494443	-2.089352	chr10	+	101686766	101690581	Intron	Up
DSG2-AS1	5.791319186	1.153930406	12.57514278	2.66E-07	1.06E-05	7.414155668	chr18	-	29122108	29136874	Sense	Up
EAF1-AS1	7.096335288	7.026017307	9.005244897	5.27E-06	0.000125958	4.616095731	chr3	-	15480152	15493109	Antisense	Up
EIF1B-AS1	4.203114481	6.749056798	5.645431145	0.000243903	0.003418327	0.805986566	chr3	-	40214637	40351189	Sense	Up
EVX1-AS	6.083568006	2.833143346	23.93549823	6.43E-10	1.49E-07	12.354619	chr7	-	27278861	27286848	Sense	Up
FAM13A-AS1	6.137647305	3.625727524	12.40696331	3.01E-07	1.16E-05	7.347564032	chr4	+	89630846	89651254	Sense	Up
FAM95B1	-3.100762787	0.556050568	-4.760427603	0.000847712	0.009847826	-0.556596631	chr9	+	42466316	42474239	Antisense	Down
FARP1-AS1	4.10691	6.221241	3.52379	0.005811758	0.04809132	-2.468744	chr13	-	99087658	99088094	Intergenic	Up
FARSA-AS1	2.916211832	7.040584528	6.10452312	0.000133447	0.002042031	1.482502575	chr19	+	13041335	13044110	Antisense	Up
FLNB-AS1	6.292572608	6.805214631	4.694964466	0.0009337	0.010666996	-0.657545401	chr3	-	58148273	58156363	Antisense	Up
FOXP1-AS1	6.13092805	1.287781402	11.00664568	8.90E-07	2.82E-05	6.287426911	chr3	+	71338907	71359918	Antisense	Up
GCC2-AS1	6.246162201	2.384295585	4.586823359	0.001096749	0.012208444	-0.780342001	chr2	-	109123970	109150652	Antisense	Up
GLTSCR2-AS1	3.335615971	2.39296732	4.957735098	0.000635927	0.007728886	-0.235362038	chr19	-	48260292	48272097	Intergenic	Up
GLYCTK-AS1	5.49685355	0.997046205	14.95469533	5.38E-08	2.92E-06	8.794366585	chr3	-	52322595	52333040	Sense	Up
GMDS-AS1	-4.396276789	2.161721998	-5.356322073	0.000361935	0.004788516	0.406880452	chr6	+	2245981	2484261	Sense	Down
GNAS-AS1	-5.073123	2.17303	-3.804995	0.003686143	0.03326056	-2.051859	chr20	-	57392058	57425958	Sense	Down
GRTP1-AS1	6.24359083	2.88331458	12.09689756	3.79E-07	1.40E-05	7.154882916	chr13	+	113962828	114016183	Sense	Up
GTF3C2-AS1	3.76073001	6.267077618	4.562377855	0.001137651	0.012536944	-0.782842781	chr2	+	27558408	27565466	Sense	Up
H1FX-AS1	3.038335506	8.946386318	11.11033709	8.18E-07	2.63E-05	6.384794235	chr3	+	129034234	129043412	Sense	Up
HAGLROS	6.229335576	3.19121613	13.03602593	1.91E-07	8.04E-06	7.782499822	chr2	+	177042437	177043874	Sense	Up
HOXA10-AS	3.048635193	8.583249976	11.71965832	5.05E-07	1.77E-05	6.78768446	chr7	+	27208164	27213403	Sense	Up
HOXC-AS3	-5.587481903	1.427423959	-7.141369563	3.78E-05	0.000679691	2.665699049	chr12	-	54375292	54379303	Sense	Down
IDH1-AS1	5.892972719	2.620333961	22.41754306	1.20E-09	2.04E-07	11.87607976	chr2	+	209119956	209120918	Sense	Up
IDI2-AS1	9.844838971	4.757448615	23.78211692	6.84E-10	1.50E-07	12.1550534	chr10	+	1068576	1090141	Sense	Up
IGBP1-AS2	9.161741795	4.685426561	15.67326145	3.48E-08	2.08E-06	9.28375265	chrX	-	69368431	69369504	Antisense	Up
IQCH-AS1	4.647407321	1.256459323	10.58282703	1.27E-06	3.80E-05	5.98371931	chr15	-	67695948	67814182	Sense	Up
ITGA9-AS1	-6.274290298	2.786209503	-23.35059812	8.14E-10	1.60E-07	11.83535822	chr3	-	37786922	37903271	Sense	Down
KDM4A-AS1	4.494739573	5.706685077	5.454303826	0.000316203	0.004258914	0.519715187	chr1	-	44165408	44173809	Sense	Up
LAMTOR5-AS1	6.03902	9.556977	3.609829	0.005051118	0.04284659	-2.387911	chr1	+	110889936	110974982	Sense	Up
LIMD1-AS1	4.597823	7.799053	4.080192	0.002383168	0.02321792	-1.515741	chr3	-	45718142	45730626	Sense	Up
LINC-PINT	-2.85828	4.799715	-4.285025	0.001733851	0.01787756	-1.296487	chr7	-	130614747	130794939	Sense	Down
LINC00094	3.852923	5.798562	3.686904	0.004457822	0.03876701	-2.201853	chr9	+	136890607	136899788	Sense	Up
LINC00115	-3.446058	0.8763697	-3.748715	0.00403481	0.03572725	-2.159974	chr1	-	521368	753092	Antisense	Down
LINC00237	-4.446047419	1.047738954	-5.129365629	0.000497502	0.00627256	-0.001202578	chr20	-	21068244	21086999	Intergenic	Down
LINC00390	-4.630993498	1.06133131	-5.923894104	0.000168608	0.002496048	1.178667942	chr13	-	44649456	44711480	Antisense	Down
LINC00431	-4.569312799	1.001730586	-5.439597564	0.000322651	0.004334599	0.44668305	chr13	+	111618373	111643222	Intergenic	Down
LINC00466	-4.694525172	1.323077851	-8.956056664	5.53E-06	0.00013084	4.541531342	chr1	-	63624706	63782955	Sense	Down
LINC00475	-3.505426782	1.568202166	-4.340690659	0.001591859	0.016622501	-1.133387612	chr9	+	94903514	94922396	Sense	Down
LINC00526	6.498531381	6.295117353	6.522597572	7.89E-05	0.0012963	1.906406796	chr18	-	5232874	5238597	Sense	Up
LINC00620	-5.240570241	1.270274066	-5.679454605	0.000233012	0.003286614	0.774748124	chr3	+	13667221	13788132	Sense	Down
LINC00649	2.681279208	7.115299088	5.541319169	0.000280776	0.003849942	0.584687297	chr21	+	35287837	35351160	Sense	Up
LINC00689	4.816851864	2.646990047	10.31790272	1.59E-06	4.57E-05	5.763426864	chr7	+	158801191	158822886	Sense	Up
LINC00710	-3.521187	0.6143819	-4.342376	0.001587758	0.01658926	-1.195817	chr10	-	10969020	10994544	Sense	Down
LINC00842	-3.434277	1.548085	-4.183647	0.002028015	0.02040751	-1.446323	chr10	-	47011752	47174018	Sense	Down
LINC00847	3.976174822	7.46543361	5.586435123	0.000264109	0.00365618	0.716102317	chr5	+	180256955	180262726	Sense	Up
LINC00890	4.694847438	6.235872619	12.64142273	2.53E-07	1.02E-05	7.502308938	chrX	+	110755007	110864724	Sense	Up
LINC00894	2.681931	7.932151	3.621091	0.004959521	0.04219982	-2.233773	chrX	+	149101199	149392815	Sense	Up
LINC00905	-4.237929	0.7025233	-3.628474	0.004900418	0.04179034	-2.327518	chr19	+	16142116	16147295	Sense	Down
LINC00943	-5.438267138	1.103150777	-10.89435783	9.76E-07	3.07E-05	6.170718376	chr12	+	127210815	127230800	Sense	Down
LINC00959	-5.125354321	1.231569908	-7.875659746	1.67E-05	0.00033744	3.477352872	chr10	-	131857147	131909092	Sense	Down
LINC01016	-2.200121	0.403703988	-4.679226659	0.000955728	0.010878259	-0.582826726	chr6	-	33835282	33864691	Sense	Down
LINC01039	-3.690419012	0.661775783	-4.600710734	0.001074212	0.011999092	-0.79516355	chr13	+	100229365	100238233	Intergenic	Down
LINC01091	-7.072256332	3.228840469	-16.67699818	1.95E-08	1.35E-06	9.715545403	chr4	+	124560705	124883820	Sense	Down
LINC01102	-4.290255	0.6799886	-3.562368	0.005456929	0.04569769	-2.466131	chr2	+	105049724	105137290	Sense	Down
LINC01146	-4.09102574	2.308754408	-11.89564349	4.41E-07	1.58E-05	6.846955576	chr14	+	88490882	88566460	Sense	Down
LINC01224	-5.155880475	2.136652124	-13.6160973	1.28E-07	5.80E-06	7.786019008	chr19	-	23581790	23598903	Intergenic	Down
LINC01270	-4.254124347	0.840873838	-6.124135122	0.000130135	0.002002341	1.438477653	chr20	+	48909256	48932000	Sense	Down
LINC01297	-3.949417977	1.059335397	-5.086404919	0.00052882	0.006596786	-0.065918565	chr14	-	19932011	19972292	Intergenic	Down
LINC01359	-4.629485356	0.866420355	-4.389478753	0.001477533	0.015615843	-1.111462328	chr1	-	65437907	65468159	Sense	Down
LINC01535	-5.029883838	1.021697797	-8.106278396	1.31E-05	0.000272953	3.719881842	chr19	+	37742786	37756471	Sense	Down
LINC01550	-5.767641306	1.67419084	-7.245115035	3.35E-05	0.00061193	2.803048886	chr14	-	98391946	99008671	Sense	Down
LINC01606	-5.601068395	1.336181459	-10.57313953	1.28E-06	3.82E-05	5.970447563	chr8	+	58055261	58152857	Sense	Down
LIPE-AS1	4.197669523	2.186505943	5.842177339	0.000187695	0.00273887	1.007403851	chr19	+	42901279	43156816	Sense	Up
lnc-A1BG-3	5.05834442	4.390509801	14.99745755	5.24E-08	2.87E-06	8.663414197	chr19	-	58794698	58798763	Antisense	Up
lnc-AARS-1	5.52410921	1.794533846	20.10106488	3.37E-09	3.81E-07	11.17200289	chr16	-	70349542	70380650	Sense	Up
lnc-ABAT-3	3.214235344	5.571225851	4.278315323	0.00175185	0.018036468	-1.157476651	chr16	+	8882696	8889519	Antisense	Up
lnc-ABCA5-7	4.849613496	3.415786629	8.027097196	1.42E-05	0.000293793	3.641764989	chr17	-	67529586	67545112	Antisense	Up
lnc-ABCC3-1	7.941522551	4.910818952	14.47853718	7.26E-08	3.66E-06	8.582588507	chr17	+	48770808	48772810	Intron	Up
lnc-ABCC4-1	3.708702696	1.039816536	5.909580505	0.000171794	0.002532457	1.119937548	chr13	-	95954704	95956401	Intergenic	Up
lnc-ABCD3-1	-4.34794	0.8695866	-3.86641	0.003341446	0.03072646	-1.96836	chr1	+	95007515	95008786	Intergenic	Down
lnc-ABHD12B-1	6.828590414	4.584346453	7.411597686	2.78E-05	0.000518951	2.945335911	chr14	+	51378943	51380076	Antisense	Up
lnc-ABHD12B-4	4.896015084	0.801115954	10.59384721	1.25E-06	3.77E-05	5.997268741	chr14	+	51411364	51413305	Intergenic	Up
lnc-ABHD4-1	3.287244832	0.310939646	5.830856227	0.000190518	0.002776191	1.012382947	chr14	+	23065684	23065968	Intergenic	Up
lnc-AC002553.1-1	7.529378512	3.589445459	18.61861826	6.93E-09	6.33E-07	10.56495087	chr17	+	15943785	15944587	Antisense	Up
lnc-AC006050.2.1-6	8.238731752	3.801385326	28.01163193	1.44E-10	6.68E-08	13.16318588	chr17	-	28934569	28935580	Antisense	Up
lnc-AC006455.1-12	-6.745658152	9.587777169	-5.451215148	0.000317546	0.004274246	0.462499058	chr7	+	61968943	61971191	Intergenic	Down
lnc-AC007390.5.1-1	6.290093833	2.896378185	9.630962646	2.93E-06	7.65E-05	5.191217709	chr2	+	37440609	37443336	Antisense	Up
lnc-AC007390.5.1-4	5.835393792	1.938907139	18.44641201	7.56E-09	6.74E-07	10.55356621	chr2	+	37375672	37376447	Antisense	Up
lnc-AC008073.6.1-2	8.726265942	5.193963052	15.21128266	4.59E-08	2.58E-06	9.05291394	chr2	+	24298886	24392507	Sense	Up
lnc-AC008686.1-4	4.490257	4.371912	3.570568	0.00538446	0.04517222	-2.410189	chr19	-	13882931	13884447	Antisense	Up
lnc-AC010336.2-1	6.068494607	3.741337716	13.05725044	1.88E-07	7.96E-06	7.79267804	chr19	-	7971110	7974758	Antisense	Up
lnc-AC010872.2.1-2	-4.996920941	1.164311216	-5.381487673	0.000349548	0.004652597	0.368267471	chr2	+	21267100	21268881	Intergenic	Down
lnc-AC011239.1.1-6	-4.028527326	0.715404468	-6.617576221	7.03E-05	0.001172099	2.051584465	chr2	-	23724794	23727929	Intron	Down
lnc-AC011443.1-4	8.412459817	4.757062226	27.47734849	1.73E-10	7.53E-08	12.8469078	chr19	+	39521075	39521963	Antisense	Up
lnc-AC011551.1-1	3.061307123	10.72838985	10.32729495	1.58E-06	4.54E-05	5.778965022	chr19	-	47112377	47114130	Antisense	Up
lnc-AC018816.3.1-11	7.395268299	3.241822985	24.365897	5.43E-10	1.34E-07	12.46908068	chr3	-	4725382	4752120	Antisense	Up
lnc-AC018816.3.1-9	5.119104197	2.441706586	12.43514024	2.94E-07	1.14E-05	7.368682775	chr3	-	4855977	4898439	Intergenic	Up
lnc-AC019294.2-1	-2.181948	0.5688525	-3.794349	0.003749591	0.03369395	-2.018013	chr15	+	76030160	76055706	Antisense	Down
lnc-AC020907.3-2	5.075327007	0.891203179	8.581724758	8.01E-06	0.000178985	4.206304532	chr19	-	35533369	35533601	Intron	Up
lnc-AC027323.1-2	5.857155973	2.922891282	12.73033039	2.38E-07	9.65E-06	7.578049461	chr5	-	90670816	90676837	Sense	Up
lnc-AC040934.1-1	5.225372	1.128026	4.310226	0.001667974	0.01731356	-1.209581	chr17	-	45486687	45500892	Antisense	Up
lnc-AC040934.1-3	5.159472918	6.697682282	5.020576466	0.000580976	0.007139872	-0.168142466	chr17	-	45699207	45727274	Antisense	Up
lnc-AC073416.2-11	-2.987584	1.161786	-3.814928	0.003627956	0.03284085	-1.934917	chr2	+	91750721	91768920	Intergenic	Down
lnc-AC074212.3.1-1	4.738293	4.799427	3.736838	0.004112702	0.0363002	-2.174729	chr19	+	46272071	46276076	Antisense	Up
lnc-AC079341.1-10	5.257812941	2.39984959	19.08907081	5.48E-09	5.37E-07	10.79101571	chr4	+	121843096	121844760	Antisense	Up
lnc-AC084851.1-9	3.945781668	3.112886181	6.087690773	0.000136362	0.002078275	1.326695388	chr11	+	49453961	49456076	Intergenic	Up
lnc-AC087289.1-1	3.848479712	0.699235724	6.343088978	9.86E-05	0.001574411	1.700410335	chr17	-	73814895	73816136	Antisense	Up
lnc-AC087491.2.1-1	4.110586675	0.724001736	7.993182813	1.47E-05	0.000302903	3.608589359	chr17	+	37775865	37778766	Intergenic	Up
lnc-AC091132.1-3	7.47061458	3.285231462	22.7231393	1.05E-09	1.89E-07	11.96258869	chr17	+	43623169	43640596	Intergenic	Up
lnc-AC092295.7.1-2	6.077233728	5.142772623	4.360304204	0.001544809	0.016228451	-1.178028636	chr19	+	37001926	37005584	Intron	Up
lnc-AC107021.1-9	-5.104492288	1.511468298	-9.531815277	3.21E-06	8.29E-05	5.030653557	chr3	+	145091511	145098582	Intergenic	Down
lnc-AC114947.1.1-1	7.086611457	6.446163658	6.377244486	9.45E-05	0.001520826	1.741145898	chr5	+	43287702	43290941	Antisense	Up
lnc-AC115618.1-1	5.762812315	3.602603249	6.778056175	5.79E-05	0.000984123	2.204055159	chrX	-	48438161	48439545	Antisense	Up
lnc-AC127496.3-6	6.228022188	3.875933062	19.05466786	5.57E-09	5.41E-07	10.76697719	chr17	-	78934565	78935513	Intergenic	Up
lnc-AC127496.3-7	6.818176254	3.053756053	23.14053515	8.87E-10	1.72E-07	12.03822313	chr17	-	78914217	78915833	Intergenic	Up
lnc-ACMSD-6	-2.841887	0.5476802	-3.71118	0.004286407	0.03753374	-2.141361	chr2	+	134924890	134928661	Intergenic	Down
lnc-ACP1-3	-5.564354594	1.411090444	-7.025376031	4.32E-05	0.000765693	2.520965799	chr2	+	196544	211224	Intergenic	Down
lnc-ACSBG1-4	7.812228048	6.974927038	16.19191469	2.57E-08	1.66E-06	9.325642589	chr15	-	78573291	78574532	Antisense	Up
lnc-ACVR2B-1	4.107000413	1.693592263	7.52321365	2.45E-05	0.000465151	3.071570396	chr3	+	38487686	38494249	Antisense	Up
lnc-ACY1-2	5.173473351	11.0591401	12.62963882	2.56E-07	1.02E-05	7.468918723	chr3	+	52027639	52029482	Antisense	Up
lnc-ADAM17-1	3.260495	0.9207145	3.982294	0.002780023	0.02649575	-1.763821	chr2	-	9613228	9614664	Antisense	Up
lnc-ADAM21-4	4.679301	0.8825961	4.171677	0.002066081	0.02069099	-1.473484	chr14	+	70830398	70834616	Intron	Up
lnc-ADAM22-2	7.200175762	6.026810409	4.875177854	0.000716715	0.008556588	-0.380151368	chr7	+	87848673	87921781	Antisense	Up
lnc-ADAMTS16-2	-2.188209	0.3960377	-3.937421	0.002984643	0.02810013	-1.809418	chr5	+	4866520	4874872	Intergenic	Down
lnc-ADAMTS18-1	9.406338309	3.731774964	32.7558917	3.22E-11	3.36E-08	14.03586072	chr16	-	77235370	77283854	Antisense	Up
lnc-ADAMTS18-3	4.818512666	3.662213016	5.837425287	0.000188875	0.002753199	0.986134629	chr16	-	77775364	77797452	Antisense	Up
lnc-ADC-1	3.621882	1.736558	3.518835	0.005859042	0.04841553	-2.526628	chr1	+	33452552	33498070	Antisense	Up
lnc-ADCK3-1	5.385860581	5.942746243	4.825175268	0.000770925	0.009114809	-0.458283823	chr1	+	227179840	227180907	Intron	Up
lnc-AE000662.92.1-10	-3.652874938	0.609807347	-4.607728449	0.001063011	0.011902591	-0.785558574	chr14	+	22337289	23016567	Intergenic	Down
lnc-AF127577.1-3	6.979153826	2.422137181	24.91201608	4.40E-10	1.21E-07	12.50984547	chr21	+	16333629	16336554	Antisense	Up
lnc-AF131216.6.1-2	6.637722632	2.885668476	14.20336558	8.68E-08	4.22E-06	8.476902537	chr8	-	11181415	11182018	Antisense	Up
lnc-AFM-3	4.301947806	2.423647875	6.769300398	5.85E-05	0.000993425	2.191476412	chr4	+	74426244	74438192	Antisense	Up
lnc-AGGF1-1	6.580444405	1.40783884	11.59434236	5.57E-07	1.91E-05	6.756696832	chr5	+	76369705	76370345	Intergenic	Up
lnc-AGMAT-4	6.047536462	2.819522494	20.19049802	3.23E-09	3.73E-07	11.21193623	chr1	-	15892105	15892451	Antisense	Up
lnc-AGPS-3	5.014618455	5.985596517	6.461139069	8.52E-05	0.001385271	1.866959459	chr2	+	178563156	178588017	Antisense	Up
lnc-AGRP-7	-3.810184	0.7024666	-3.685125	0.004470664	0.03884638	-2.229831	chr16	-	67589586	67592996	Intergenic	Down
lnc-AHSA2-5	3.089274133	5.096113685	7.392104537	2.84E-05	0.000529274	2.971893414	chr2	+	61698106	61711076	Antisense	Up
lnc-AIDA-1	6.903185311	3.711123237	26.59941103	2.36E-10	8.82E-08	12.85020958	chr1	-	222832208	222834854	Antisense	Up
lnc-AIDA-2	6.300612665	4.597473102	5.40207775	0.000339752	0.004536645	0.38504728	chr1	-	222897535	222946483	Antisense	Up
lnc-AL033381.1-4	-4.406844097	0.992693617	-4.943161733	0.000649448	0.007872633	-0.208876835	chr6	+	1143794	1157308	Intergenic	Down
lnc-AL033381.1-8	-4.852174176	0.92070033	-8.894392625	5.87E-06	0.000136548	4.510326532	chr6	+	1186739	1192467	Intergenic	Down
lnc-AL049840.1-1	4.297871173	1.154270696	5.039692262	0.000565285	0.006979243	-0.102798351	chr14	+	104179903	104180586	Intron	Up
lnc-AL136219.1-3	4.173713	3.901866	3.611056	0.005041056	0.04277176	-2.387735	chr13	-	21872479	21876009	Antisense	Up
lnc-AL391421.1-2	2.773354731	8.492935541	8.070611591	1.36E-05	0.000282267	3.680226126	chr10	+	79542623	79552934	Antisense	Up
lnc-AL590867.1-4	3.840034	3.01278	3.525739	0.005793264	0.04798576	-2.523979	chr6	+	153323926	153331856	Antisense	Up
lnc-AL901608.1-17	-4.765426154	1.112078066	-5.953046263	0.000162314	0.002412273	1.146351837	chr14	-	106576802	106598011	Intergenic	Down
lnc-AL901608.1-3	-4.884025896	1.446903424	-5.193260615	0.000454542	0.005804398	0.093286359	chr14	-	106064223	107218968	Sense	Down
lnc-ALDH1A2-3	2.030283296	7.314625951	6.130664263	0.000129052	0.001987142	1.397531425	chr15	-	57819384	57821207	Antisense	Up
lnc-ALG2-6	-4.409979	0.881771	-4.109227	0.00227731	0.02232522	-1.522829	chr9	-	102117618	102139522	Sense	Down
lnc-ALG3-1	3.995719497	1.213838119	11.68257639	5.20E-07	1.81E-05	6.816490353	chr3	-	183942734	183948316	Intergenic	Up
lnc-ALG3-3	6.00258785	1.77137032	16.13410288	2.65E-08	1.71E-06	9.522798831	chr3	-	183851806	183853026	Antisense	Up
lnc-ALPK1-2	5.283533728	5.643993298	6.18129224	0.000120979	0.001877349	1.474727603	chr4	+	113206664	113274168	Sense	Up
lnc-ALPK2-4	6.110126	8.478637	4.012891	0.002648999	0.02541257	-1.71441	chr18	-	56065559	56067314	Antisense	Up
lnc-ALPK2-6	6.396722921	2.266774431	20.44654801	2.86E-09	3.54E-07	11.27404423	chr18	-	56419410	56421130	Intergenic	Up
lnc-ALX4-5	7.35787971	3.437751436	18.23618739	8.42E-09	7.25E-07	10.46274943	chr11	-	43851258	43902276	Antisense	Up
lnc-ALX4-7	8.268619938	5.260091003	11.86630141	4.51E-07	1.61E-05	6.904310096	chr11	-	43350297	43381056	Antisense	Up
lnc-AMDHD1-2	8.18213836	3.614148971	26.71966622	2.26E-10	8.74E-08	13.00427264	chr12	+	96419100	96421749	Antisense	Up
lnc-AMDHD1-3	8.59592812	4.141596408	29.04227728	1.02E-10	5.68E-08	13.45045993	chr12	+	96429136	96441430	Antisense	Up
lnc-AMDHD1-4	7.724962568	6.138324318	4.988064181	0.000608742	0.007450457	-0.219904597	chr12	+	96410369	96478607	Antisense	Up
lnc-AMDHD2-2	5.437677767	3.163132431	13.63479824	1.26E-07	5.74E-06	8.088438724	chr16	+	2577080	2581423	Sense	Up
lnc-AMELY-10	4.811002735	0.812090617	8.501521517	8.68E-06	0.000191613	4.126484355	chrY	-	6968773	6974543	Intergenic	Up
lnc-AMFR-2	3.977287138	0.533719174	7.05205347	4.19E-05	0.00074571	2.553316248	chr16	-	56226525	56228437	Sense	Up
lnc-AMN-1	5.691083	6.431941	3.854528	0.003405394	0.03123864	-1.987555	chr14	+	103399910	103403514	Intron	Up
lnc-AMN-3	5.251849	5.122342	4.206397	0.001957692	0.01981429	-1.407566	chr14	+	103474076	103475968	Antisense	Up
lnc-ANAPC11-2	3.072377	9.007558	3.562918	0.005452038	0.04566587	-2.447768	chr17	+	79825596	79826149	Antisense	Up
lnc-ANAPC11-4	3.863687455	1.214857836	7.363415524	2.93E-05	0.000544734	2.933482577	chr17	+	79839550	79840964	Intergenic	Up
lnc-ANGPT2-2	5.854293784	1.906831285	26.73445745	2.25E-10	8.74E-08	12.84406075	chr8	-	6261076	6264663	Sense	Up
lnc-ANGPTL2-1	5.848059233	1.982385719	17.85871151	1.03E-08	8.27E-07	10.31036908	chr9	-	129976313	129984186	Intergenic	Up
lnc-ANGPTL6-1	2.792503	5.203926	3.865267	0.003347543	0.03077547	-1.813316	chr19	-	10199707	10201059	Antisense	Up
lnc-ANKMY2-1	6.067980049	2.907861877	16.51157016	2.14E-08	1.44E-06	9.709256714	chr7	-	16735495	16759523	Antisense	Up
lnc-ANKRD20A2-14	4.4972205	4.13628636	5.476944231	0.000306545	0.004150216	0.545607828	chr9	+	41954579	41955037	Antisense	Up
lnc-ANKRD27-6	4.535989724	1.25706345	8.959348052	5.51E-06	0.000130644	4.568332959	chr19	-	33169525	33180166	Intergenic	Up
lnc-ANKRD30A-5	-6.536475525	1.994389087	-14.95588001	5.38E-08	2.92E-06	8.546433484	chr10	+	37684460	37730322	Intergenic	Down
lnc-ANKRD50-3	-3.891444092	0.584249938	-8.51104765	8.60E-06	0.000190176	4.13433943	chr4	-	125070531	125173199	Intergenic	Down
lnc-ANKS6-1	6.480106355	2.925898018	24.14970011	5.91E-10	1.41E-07	12.29902396	chr9	-	101609510	101634697	Antisense	Up
lnc-AP002414.1.1-1	6.470786567	2.651638984	15.37701718	4.15E-08	2.40E-06	9.09135454	chr18	-	12031120	12032180	Intergenic	Up
lnc-AP005482.1.1-2	7.284303812	3.334861916	12.99274452	1.97E-07	8.24E-06	7.749112754	chr18	+	12658736	12686490	Sense	Up
lnc-AP1S2-1	6.362290524	2.799869166	26.3943418	2.54E-10	8.94E-08	12.84149675	chrX	-	15801327	15802658	Antisense	Up
lnc-AP3S1-1	6.374957118	4.730338359	18.71007118	6.62E-09	6.11E-07	10.57535323	chr5	+	115150891	115167054	Antisense	Up
lnc-AP3S1-15	9.267482898	4.247473261	35.89689434	1.34E-11	3.12E-08	14.40464759	chr5	+	114598201	114599145	Antisense	Up
lnc-AP3S1-4	7.124319379	3.076192867	19.4742712	4.54E-09	4.70E-07	10.93750899	chr5	+	114937843	114956356	Sense	Up
lnc-AP3S1-6	5.229672884	6.224979714	4.716076214	0.000904995	0.010400917	-0.620390638	chr5	+	114512863	114516020	Antisense	Up
lnc-AP3S1-9	4.260876748	0.615421968	7.970401162	1.51E-05	0.000309113	3.579606828	chr5	+	114914611	114915030	Intron	Up
lnc-AP4E1-1	4.947918684	1.466777883	11.81624118	4.69E-07	1.65E-05	6.950443056	chr15	+	51038905	51042026	Antisense	Up
lnc-APC-4	7.902487933	3.982771478	22.33164155	1.24E-09	2.07E-07	11.86709238	chr5	+	111527713	111545836	Antisense	Up
lnc-APEX1-2	-4.612351967	0.974909931	-6.257837652	0.000109792	0.001728112	1.610460287	chr14	+	20906140	20909427	Intergenic	Down
lnc-APITD1-CORT-1	6.577052255	5.078460659	4.508316828	0.001233979	0.013400738	-0.947145713	chr1	+	10516602	10520093	Intergenic	Up
lnc-AQP8-1	4.29743453	1.417752198	5.168017166	0.000471019	0.005987387	0.08463154	chr16	+	25249638	25250608	Intron	Up
lnc-ARF1-1	4.177117844	0.693111098	7.405882385	2.80E-05	0.000522063	2.967378562	chr1	+	228291025	228292647	Antisense	Up
lnc-ARF6-1	3.943794371	16.5554164	7.966573451	1.51E-05	0.00030992	3.57844469	chr14	+	50320439	50329571	Intergenic	Up
lnc-ARHGAP11B-8	-4.485901399	1.311005251	-4.772678617	0.00083258	0.009701465	-0.504044534	chr15	+	31218716	31220610	Intron	Down
lnc-ARHGAP17-9	3.640393308	0.352500378	9.379931222	3.69E-06	9.33E-05	4.963399382	chr16	-	25082810	25084048	Intergenic	Up
lnc-ARHGAP26-4	-4.579281363	1.464478855	-8.750753157	6.77E-06	0.000154403	4.339882572	chr5	+	141704857	142051566	Sense	Down
lnc-ARHGAP28-7	8.124472472	6.405603816	9.141830119	4.62E-06	0.000113039	4.744493734	chr18	+	6926942	6928209	Antisense	Up
lnc-ARHGAP32-4	5.724132819	2.479035501	18.49603914	7.37E-09	6.66E-07	10.53269553	chr11	-	129317899	129321731	Antisense	Up
lnc-ARHGEF26-3	6.030963233	4.275138448	10.03124471	2.04E-06	5.63E-05	5.538492024	chr3	+	153747015	153830842	Antisense	Up
lnc-ARHGEF38-1	5.491362924	5.842800864	4.574430553	0.001117285	0.012381024	-0.84120507	chr4	+	106599296	106629250	Antisense	Up
lnc-ARHGEF40-1	7.065748746	4.291107163	18.25371067	8.35E-09	7.20E-07	10.42666362	chr14	+	21558545	21560491	Antisense	Up
lnc-ARID2-11	3.324261106	5.032683757	5.212469049	0.000442418	0.005673835	0.136847143	chr12	+	46752133	46754400	Intron	Up
lnc-ARID5A-2	6.194477999	3.984013164	7.945319692	1.55E-05	0.000315631	3.536215412	chr2	+	97260749	97261170	Intron	Up
lnc-ARL1-3	6.585326536	2.9118074	21.07132589	2.15E-09	2.89E-07	11.4995513	chr12	-	101727190	101742307	Antisense	Up
lnc-ARL13A-1	5.359823386	2.230192794	19.70397251	4.06E-09	4.30E-07	10.95492728	chrX	+	100258820	100262956	Intergenic	Up
lnc-ARL16-1	2.942215096	5.530498222	7.587290647	2.28E-05	0.000440056	3.179990426	chr17	-	79668353	79670330	Intergenic	Up
lnc-ARL4C-2	4.415599492	1.808520036	11.2319341	7.42E-07	2.43E-05	6.516079556	chr2	-	235742958	235822028	Intergenic	Up
lnc-ARL4D-1	6.523461062	3.531582539	9.898951823	2.30E-06	6.22E-05	5.430484274	chr17	+	41455316	41458968	Antisense	Up
lnc-ARL6IP5-1	2.990059667	7.419047845	5.279091197	0.000402984	0.005240427	0.284686428	chr3	+	69063314	69105773	Antisense	Up
lnc-ARMC2-1	7.906746987	3.927915704	16.23327483	2.51E-08	1.64E-06	9.564342677	chr6	+	109319684	109320328	Antisense	Up
lnc-ARMC6-1	2.743167971	6.825955315	9.794192724	2.52E-06	6.73E-05	5.226206322	chr19	+	19101701	19104419	Antisense	Up
lnc-ARMC7-1	4.737456938	7.184225049	5.077019923	0.000535939	0.006666717	-0.078907555	chr17	+	73126977	73129138	Antisense	Up
lnc-ARPC4-3	4.190421726	0.570841891	9.156665997	4.56E-06	0.000111645	4.758346942	chr3	+	9875767	9876892	Sense	Up
lnc-ARRDC1-1	6.684993331	4.981317899	11.65026161	5.33E-07	1.84E-05	6.780018597	chr9	+	140477240	140479475	Antisense	Up
lnc-ARVCF-4	3.368519127	6.621198308	6.070283083	0.000139449	0.002120692	1.418400801	chr22	-	20050502	20058066	Antisense	Up
lnc-ASB5-1	6.173339757	4.418882652	10.03058049	2.04E-06	5.63E-05	5.544106425	chr4	-	177229418	177241609	Antisense	Up
lnc-ASCC2-1	6.447224308	2.827041732	18.71236582	6.61E-09	6.11E-07	10.6548117	chr22	-	30363671	30498134	Sense	Up
lnc-ASH2L-1	5.868509	6.579197	4.285762	0.001731886	0.0178617	-1.293675	chr8	+	38006258	38021290	Antisense	Up
lnc-ASPRV1-2	6.278864158	3.152044836	9.295301527	4.00E-06	9.99E-05	4.886748221	chr2	-	70168652	70169021	Antisense	Up
lnc-ATF7IP2-1	4.97825141	4.521975262	10.00074625	2.10E-06	5.77E-05	5.501220428	chr16	+	10623296	10625939	Intron	Up
lnc-ATG10-6	6.346992725	10.31015242	4.576558827	0.001113729	0.01235144	-0.800096947	chr5	+	81460263	81572676	Sense	Up
lnc-ATG12-5	6.803978815	5.945643106	4.78320033	0.000819814	0.009584086	-0.518503129	chr5	-	115419213	115421113	Antisense	Up
lnc-ATG13-1	4.13341139	0.570506068	7.915699673	1.60E-05	0.000324379	3.52144718	chr11	+	46698078	46698679	Antisense	Up
lnc-ATG5-3	5.013440473	5.912102384	7.33292306	3.03E-05	0.000561601	2.873184213	chr6	-	106872035	106919681	Intergenic	Up
lnc-ATL1-2	4.7412967	2.762393525	7.120533958	3.87E-05	0.000693748	2.623086967	chr14	+	50915524	50923460	Antisense	Up
lnc-ATM-1	5.968552637	2.93684128	16.00055103	2.87E-08	1.82E-06	9.42969094	chr11	+	108368841	108373612	Antisense	Up
lnc-ATM-2	7.379525757	3.744020016	8.000377869	1.46E-05	0.000301191	3.596594956	chr11	+	108383188	108388342	Intron	Up
lnc-ATP11B-6	6.451894163	2.073647114	24.78194633	4.62E-10	1.23E-07	12.3405421	chr3	+	182655945	182657951	Antisense	Up
lnc-ATP1A3-1	-3.499856544	1.237090166	-6.543076742	7.70E-05	0.001266107	1.959181215	chr19	-	42511265	42515084	Intron	Down
lnc-ATP1B3-2	2.818519648	8.413562104	7.829431052	1.75E-05	0.000351936	3.438283577	chr3	+	141666274	141669388	Intron	Up
lnc-ATP2C2-1	3.91491	4.107044	3.826494	0.00356142	0.03239281	-2.027538	chr16	+	84529204	84531101	Antisense	Up
lnc-ATP5F1-2	4.934587627	0.847533755	9.721404601	2.70E-06	7.13E-05	5.266936943	chr1	+	111980135	111980659	Intergenic	Up
lnc-ATP6V1C2-2	7.567654978	3.954948501	15.36859567	4.17E-08	2.41E-06	9.140602613	chr2	+	10728455	10744956	Antisense	Up
lnc-ATP6V1C2-4	7.413745577	2.699535979	28.83617497	1.09E-10	5.92E-08	13.42349187	chr2	+	10938337	10942757	Antisense	Up
lnc-ATP6V1E2-5	4.188436249	1.253506484	6.415105178	9.02E-05	0.001458105	1.7834898	chr2	-	46717888	46769317	Sense	Up
lnc-ATP6V1G3-4	-5.58561744	2.351031131	-14.21226763	8.63E-08	4.20E-06	8.312008492	chr1	-	198771346	198990166	Sense	Down
lnc-ATPAF2-2	3.822620485	7.898308833	8.674111178	7.30E-06	0.000165116	4.2849303	chr17	-	18007558	18020918	Antisense	Up
lnc-ATPIF1-2	3.86586952	7.302637833	5.249104563	0.000420246	0.005426804	0.28789756	chr1	+	28527085	28527994	Intron	Up
lnc-B3GAT1-2	-4.298642	0.6774227	-3.597049	0.0051572	0.04354518	-2.408882	chr11	-	134815477	134846593	Intergenic	Down
lnc-B4GALT3-1	5.27186	7.605582	4.017762	0.002628751	0.02526126	-1.714592	chr1	-	161123549	161129139	Antisense	Up
lnc-B4GALT7-1	6.734240002	4.228792021	10.21689201	1.73E-06	4.91E-05	5.700593588	chr5	+	177038142	177047505	Antisense	Up
lnc-B9D1-1	7.788128251	5.085926983	22.587417	1.12E-09	1.97E-07	11.88852344	chr17	-	19237620	19239440	Intergenic	Up
lnc-BACE1-2	-3.975315	1.377509	-3.654786	0.004695684	0.04040223	-2.290021	chr11	-	117077395	117089180	Sense	Down
lnc-BAG3-1	5.035347	4.007418	3.892574	0.00320503	0.02973326	-1.923993	chr10	+	121331315	121334113	Antisense	Up
lnc-BARHL2-4	-4.790504118	1.035008862	-6.995533494	4.48E-05	0.000787221	2.514367294	chr1	-	91067691	91089795	Intergenic	Down
lnc-BASP1-1	3.592838557	4.902971649	7.988006554	1.48E-05	0.000303825	3.588156363	chr5	+	17354018	17355008	Intergenic	Up
lnc-BASP1-6	4.691455676	2.004814488	7.879051919	1.66E-05	0.000336375	3.467903944	chr5	+	16615995	16630078	Sense	Up
lnc-BCAP31-1	2.682709	0.08652623	4.253746	0.00181947	0.01863174	-1.336677	chrX	-	153009573	153009904	Antisense	Up
lnc-BCL2L13-3	6.667486668	2.461303042	16.58715625	2.05E-08	1.40E-06	9.716725562	chr22	+	18214960	18217980	Antisense	Up
lnc-BCL6-9	7.465737553	4.366408633	15.77632589	3.27E-08	2.01E-06	9.320383233	chr3	-	188052372	188061851	Antisense	Up
lnc-BDH1-5	-5.081243201	1.29733244	-5.506357384	0.000294469	0.004010085	0.56287985	chr3	-	197305083	197354752	Sense	Down
lnc-BEAN1-1	6.566875756	4.27887857	12.19893952	3.51E-07	1.32E-05	7.221196321	chr16	+	66543339	66543951	Intron	Up
lnc-BHMT2-4	-3.338600303	0.515762064	-4.608896124	0.001061159	0.011896223	-0.782744126	chr5	+	78280584	78282354	Antisense	Down
lnc-BIRC8-3	6.738748621	8.529209766	4.671498071	0.000966748	0.010974587	-0.692944329	chr19	-	53958313	53960667	Intergenic	Up
lnc-BLCAP-1	-5.438494881	2.498781825	-12.33206084	3.18E-07	1.22E-05	7.205049965	chr20	-	36120873	36156264	Sense	Down
lnc-BLID-7	4.894375	4.315338	4.101705	0.002304248	0.02256286	-1.582446	chr11	-	121465022	121476369	Antisense	Up
lnc-BLK-2	4.021358825	5.322750871	4.542073885	0.001172857	0.012860529	-0.878200352	chr8	+	11279006	11280443	Antisense	Up
lnc-BLNK-4	6.418955922	2.768053288	24.82330677	4.55E-10	1.23E-07	12.50003881	chr10	-	97888811	97890249	Antisense	Up
lnc-BMP8A-2	3.125599532	1.010445329	6.057713296	0.000141725	0.002151397	1.32799243	chr1	+	40007391	40014612	Antisense	Up
lnc-BMS1-10	-5.081356683	1.497290012	-5.458444135	0.000314413	0.004239851	0.54215156	chr10	+	42529282	42530057	Intergenic	Down
lnc-BMS1-12	-6.902935825	5.987921889	-5.900806794	0.000173779	0.002556929	1.079497598	chr10	+	42383749	42423551	Intergenic	Down
lnc-BNIP2-2	-3.644511	0.4980156	-3.931373	0.00301341	0.02829453	-1.803647	chr15	-	60253375	60265587	Intergenic	Down
lnc-BOD1-1	-4.833297766	1.885298541	-4.956925157	0.00063667	0.007735675	-0.17918441	chr5	-	173084842	173252321	Sense	Down
lnc-BPHL-9	3.225344628	6.495116072	6.192136581	0.000119322	0.001854384	1.552239405	chr6	+	3271661	3281933	Intron	Up
lnc-BRAT1-2	5.575022	5.606483	4.206668	0.001956869	0.01981076	-1.418351	chr7	-	2652055	2657331	Antisense	Up
lnc-BRCA1-3	4.21071311	2.180807195	5.544017052	0.000279748	0.003837107	0.588444707	chr17	-	41300278	41322497	Sense	Up
lnc-BRD7-3	6.480059224	2.967760975	8.223793513	1.15E-05	0.000245707	3.833189118	chr16	-	50134249	50155854	Antisense	Up
lnc-BRI3-1	7.54693484	5.945750295	17.74221125	1.09E-08	8.70E-07	10.19033079	chr7	+	97935833	97939753	Antisense	Up
lnc-BRMS1L-7	7.439285246	2.742539183	26.24777488	2.67E-10	9.15E-08	12.87283803	chr14	+	36194269	36194855	Antisense	Up
lnc-BTBD10-8	5.257987	4.606409	3.91294	0.003102901	0.02898513	-1.883523	chr11	-	12957657	12967671	Antisense	Up
lnc-BTBD6-1	5.870506666	6.925868819	5.953240156	0.000162273	0.002412273	1.196909723	chr14	+	105639540	105640155	Intron	Up
lnc-BTD-1	5.711978864	3.977097315	6.17441738	0.000122042	0.001892447	1.437855712	chr3	+	15756730	15778697	Antisense	Up
lnc-BTG2-3	6.39013824	6.665847802	6.3090056	0.00010294	0.001632558	1.614877935	chr1	+	203309756	203311621	Antisense	Up
lnc-BTLA-4	-2.328122	0.1616435	-3.597108	0.0051567	0.04354518	-2.311263	chr3	-	112130090	112179627	Intergenic	Down
lnc-C10orf103-1	3.007512087	9.077146769	6.096709408	0.000134791	0.002059595	1.35883607	chr10	+	75141190	75143254	Antisense	Up
lnc-C10orf28-2	-3.233021	1.18243	-3.587428	0.005238587	0.04414325	-2.391637	chr10	+	100028224	100032135	Intergenic	Down
lnc-C10orf28-5	2.33839945	8.297989913	4.895917454	0.000695438	0.008350245	-0.334609874	chr10	+	100196109	100203552	Intergenic	Up
lnc-C11orf1-1	3.750774471	1.576882316	6.822263797	5.49E-05	0.000941919	2.269985879	chr11	+	111743331	111782833	Sense	Up
lnc-C11orf41-1	4.113809274	5.897920339	4.410269765	0.001431489	0.015213236	-1.024934761	chr11	+	33730980	33731568	Intron	Up
lnc-C11orf44-8	-2.884126	0.3586394	-4.151558	0.002131776	0.02118655	-1.504213	chr11	+	130628526	130675876	Intergenic	Down
lnc-C11orf49-3	8.399513568	3.230181782	34.23616533	2.11E-11	3.31E-08	14.25442016	chr11	+	47196407	47196619	Antisense	Up
lnc-C11orf74-7	-3.724499	0.4514276	-3.767856	0.003912506	0.03484186	-2.126878	chr11	+	38668025	38708253	Sense	Down
lnc-C12orf23-1	3.528566	4.535768	3.993525	0.002731154	0.02608349	-1.743642	chr12	+	107487075	107517092	Antisense	Up
lnc-C12orf40-3	7.816685355	4.259470661	14.10080999	9.28E-08	4.46E-06	8.378187478	chr12	+	39720074	39722713	Antisense	Up
lnc-C12orf60-2	-3.787141989	0.801013394	-4.451416451	0.001344794	0.014420679	-1.024862526	chr12	+	14956599	15059520	Sense	Down
lnc-C12orf63-3	2.469330878	0.933259512	4.779850041	0.000823856	0.009610731	-0.486131878	chr12	+	96632093	96634953	Intron	Up
lnc-C12orf66-1	5.376064734	1.158564403	11.05541716	8.56E-07	2.73E-05	6.348463177	chr12	-	64540167	64541637	Antisense	Up
lnc-C12orf66-2	5.310722941	0.910695396	12.78196069	2.29E-07	9.34E-06	7.558500701	chr12	-	64502542	64514269	Antisense	Up
lnc-C14orf102-1	10.5740281	5.06489484	27.58539682	1.67E-10	7.33E-08	12.96050321	chr14	-	90868866	90871579	Antisense	Up
lnc-C14orf177-5	2.335268	9.931854	3.934348	0.002999226	0.02821202	-1.836005	chr14	+	99439144	99439726	Intergenic	Up
lnc-C14orf23-2	-5.391370665	1.252172021	-7.716066395	1.98E-05	0.000390316	3.304156319	chr14	+	29406094	29566484	Intergenic	Down
lnc-C14orf28-2	6.147836248	2.10654748	19.60449849	4.26E-09	4.46E-07	10.94094843	chr14	+	45283074	45395793	Sense	Up
lnc-C15orf32-3	3.403537	8.152066	3.902064	0.00315701	0.02937902	-1.788362	chr15	+	93146139	93171193	Antisense	Up
lnc-C15orf41-11	-2.208824722	0.433097018	-4.708640634	0.000914996	0.010495354	-0.542478934	chr15	+	37402449	37409867	Intergenic	Down
lnc-C15orf44-1	3.701671628	1.43687458	4.399910543	0.001454237	0.015417422	-1.063844926	chr15	-	65903569	65948184	Sense	Up
lnc-C15orf48-1	5.66387001	3.790434785	10.0871269	1.94E-06	5.40E-05	5.584445602	chr15	+	45740624	45811862	Sense	Up
lnc-C16orf58-5	5.554846461	2.411440187	20.86383563	2.37E-09	3.07E-07	11.37154581	chr16	-	31720433	31723305	Intergenic	Up
lnc-C16orf61-1	6.152022225	3.564175263	10.29215495	1.62E-06	4.65E-05	5.764280046	chr16	-	81050396	81069364	Antisense	Up
lnc-C16orf62-1	5.927063203	6.032669557	4.693278238	0.000936034	0.010683918	-0.659919876	chr16	+	19717672	19726705	Antisense	Up
lnc-C16orf72-12	-3.512339	0.6388817	-3.661212	0.004647053	0.04011237	-2.255907	chr16	+	9676927	9684667	Intergenic	Down
lnc-C17orf101-3	-4.21672	1.047842	-3.499691	0.006045517	0.04960361	-2.568238	chr17	-	80344752	80346570	Intergenic	Down
lnc-C17orf104-1	6.002069	5.477578	4.162793	0.002094822	0.02091864	-1.490615	chr17	+	42754343	42765386	Antisense	Up
lnc-C17orf48-1	6.830268058	3.538973176	20.84458398	2.39E-09	3.09E-07	11.42814329	chr17	+	10584050	10587305	Intron	Up
lnc-C17orf63-2	7.755002311	4.451144882	28.09926543	1.40E-10	6.64E-08	12.74146389	chr17	-	27072586	27074670	Antisense	Up
lnc-C17orf80-6	4.48717788	0.802581205	9.117605963	4.73E-06	0.000115151	4.720054087	chr17	+	71277759	71278538	Intergenic	Up
lnc-C17orf97-5	3.667406698	7.781370269	8.488487468	8.80E-06	0.000193854	4.105334308	chr17	+	406410	421941	Antisense	Up
lnc-C18orf42-3	6.823375575	2.362976503	17.12475548	1.52E-08	1.13E-06	9.98919797	chr18	-	5240253	5241166	Intron	Up
lnc-C18orf62-1	-2.629623	0.2960696	-3.577522	0.005323786	0.04470804	-2.345513	chr18	-	73144657	73167436	Intergenic	Down
lnc-C19orf10-1	3.400989463	0.352450624	5.905822908	0.000172641	0.002543152	1.113091361	chr19	-	4654975	4655536	Antisense	Up
lnc-C19orf26-2	2.448857581	7.725697592	5.349485199	0.000365381	0.00482495	0.365457849	chr19	-	1257244	1259141	Antisense	Up
lnc-C19orf44-5	4.320081591	1.43734898	6.556530207	7.57E-05	0.00124835	1.956072851	chr19	+	16683434	16686151	Antisense	Up
lnc-C19orf6-3	6.637620018	5.839269157	5.077581387	0.00053551	0.006663365	-0.083068973	chr19	-	1036383	1037105	Antisense	Up
lnc-C19orf6-5	6.966177078	4.597666274	5.53102775	0.000284734	0.003894001	0.562783421	chr19	-	1038725	1039063	Antisense	Up
lnc-C19orf68-4	3.883762	3.861823	3.7585	0.003971793	0.0352813	-2.142543	chr19	+	48621694	48630641	Antisense	Up
lnc-C19orf71-3	4.152191123	0.7225945	6.014053655	0.000149949	0.002253326	1.286115887	chr19	+	3544196	3557567	Antisense	Up
lnc-C19orf80-1	-3.800861	0.6273159	-4.276422	0.001756965	0.01807621	-1.304499	chr19	+	11314303	11326844	Antisense	Down
lnc-C1orf106-1	-5.605998628	1.83587746	-14.59002336	6.77E-08	3.48E-06	8.718901267	chr1	+	200993058	201012201	Antisense	Down
lnc-C1orf112-3	6.380778686	3.024009422	12.08121982	3.83E-07	1.41E-05	7.143724536	chr1	+	169824994	169842473	Antisense	Up
lnc-C1orf122-1	4.721330304	2.710222964	9.420427872	3.56E-06	9.04E-05	5.002080524	chr1	+	38326368	38327252	Antisense	Up
lnc-C1orf122-2	4.225881	6.117824	3.648497	0.004743792	0.04068707	-2.320952	chr1	+	38279706	38281240	Intron	Up
lnc-C1orf123-1	2.562155363	6.691559624	4.883015613	0.000708593	0.008478993	-0.210735924	chr1	-	53676127	53679447	Antisense	Up
lnc-C1orf124-1	5.474885153	1.534045789	12.49224363	2.82E-07	1.11E-05	7.319906746	chr1	+	231464487	231467017	Intergenic	Up
lnc-C1orf132-1	-6.106238238	3.798098497	-14.98511194	5.28E-08	2.88E-06	8.44265804	chr1	-	207974862	208042495	Sense	Down
lnc-C1orf167-2	4.450089552	5.863941682	4.469546148	0.001308381	0.014093989	-0.96471053	chr1	+	11845227	11848012	Antisense	Up
lnc-C1orf177-2	2.710571	5.47532	3.511481	0.005929953	0.04888559	-2.423724	chr1	+	55352547	55354523	Antisense	Up
lnc-C1orf186-3	-2.026817	0.4594144	-3.5316	0.005738036	0.04766046	-2.509091	chr1	-	206135292	206137984	Intergenic	Down
lnc-C1orf201-3	8.812664452	8.672626912	19.68962082	4.09E-09	4.32E-07	10.54373035	chr1	-	24863137	24882515	Sense	Up
lnc-C1orf201-5	3.311787549	7.502537383	10.88165442	9.87E-07	3.09E-05	6.225404015	chr1	-	24822583	24829386	Sense	Up
lnc-C1orf43-3	4.997365	7.592498	3.890967	0.003213237	0.02979619	-1.927618	chr1	-	154213642	154214184	Antisense	Up
lnc-C1orf43-4	6.348510486	4.535400352	10.12244665	1.88E-06	5.26E-05	5.622009423	chr1	-	154232737	154238979	Antisense	Up
lnc-C1orf56-1	7.856302664	3.870088735	16.61264166	2.02E-08	1.38E-06	9.740161025	chr1	+	151021044	151024462	Sense	Up
lnc-C1orf85-1	3.280338429	7.433729229	7.431420465	2.72E-05	0.000509578	3.005221643	chr1	-	156259886	156262339	Antisense	Up
lnc-C1QBP-1	5.977362	5.811029	3.757285	0.003979564	0.03532781	-2.141873	chr17	-	5328458	5336196	Sense	Up
lnc-C1QL3-1	6.415866801	3.373054653	7.677775906	2.07E-05	0.000404522	3.244098816	chr10	-	16554078	16556515	Sense	Up
lnc-C1QTNF5-1	5.563306429	4.26284931	11.01860669	8.82E-07	2.80E-05	6.300113478	chr11	-	119206958	119208019	Antisense	Up
lnc-C1S-1	5.61128102	2.987226951	9.357414753	3.77E-06	9.51E-05	4.943568929	chr12	+	7087682	7089103	Antisense	Up
lnc-C20orf187-1	-6.449865735	2.269618622	-18.46726997	7.48E-09	6.70E-07	10.5619721	chr20	+	10653575	10982411	Antisense	Down
lnc-C20orf72-3	4.367727535	1.232973104	7.579509409	2.30E-05	0.000442836	3.176775861	chr20	+	17988136	17999652	Intergenic	Up
lnc-C20orf96-3	2.126834	7.105798	4.260254	0.001801294	0.01849544	-1.313973	chr20	-	306268	309372	Antisense	Up
lnc-C22orf26-1	5.434461761	0.966040116	12.09761264	3.78E-07	1.40E-05	7.109594228	chr22	-	46451619	46454040	Antisense	Up
lnc-C2CD4A-9	6.457899577	1.368430832	9.094538244	4.84E-06	0.000117385	4.697560249	chr15	+	62211489	62211739	Antisense	Up
lnc-C2orf18-1	-4.248042	0.689484	-3.671861	0.004567619	0.03954096	-2.261279	chr2	+	26928413	26931548	Intron	Down
lnc-C2orf40-8	4.450793823	1.867922423	5.168655745	0.000470595	0.005985628	0.045879118	chr2	+	106726630	106730096	Antisense	Up
lnc-C2orf78-3	4.169998051	4.619771396	4.374339779	0.001512046	0.015924275	-1.138959706	chr2	+	73981094	73988756	Intergenic	Up
lnc-C2orf84-1	3.349816923	0.81506089	5.291997786	0.000395791	0.005169381	0.239092868	chr2	+	24437249	24444385	Antisense	Up
lnc-C2orf89-2	5.309397382	2.660173859	8.707066357	7.06E-06	0.000160482	4.327085983	chr2	-	85097712	85134132	Antisense	Up
lnc-C3orf17-2	7.746317375	2.952565187	26.43497995	2.50E-10	8.94E-08	12.95736056	chr3	-	112709293	112710000	Antisense	Up
lnc-C3orf23-2	4.713433805	6.679874265	4.979842981	0.000615986	0.00751931	-0.133422211	chr3	+	44482423	44486946	Intron	Up
lnc-C3orf24-1	6.735383896	3.242792317	22.67736029	1.07E-09	1.92E-07	11.93663912	chr3	-	10123000	10149915	Sense	Up
lnc-C4orf21-1	8.169255893	3.741561892	21.47473036	1.80E-09	2.66E-07	11.62557361	chr4	-	113567631	113571207	Sense	Up
lnc-C4orf34-3	7.691838557	2.018684635	14.55173259	6.93E-08	3.54E-06	8.502042855	chr4	-	39548920	39551206	Intron	Up
lnc-C4orf37-2	6.467713997	3.370830807	15.31329664	4.32E-08	2.47E-06	8.844073887	chr4	-	99172838	99182781	Antisense	Up
lnc-C5orf25-1	6.786208	6.328025	3.80911	0.003661921	0.03309816	-2.061135	chr5	+	175774943	175780587	Antisense	Up
lnc-C5orf27-4	5.457472648	4.222366155	4.639344927	0.001014069	0.011443432	-0.745266723	chr5	+	95213691	95221593	Antisense	Up
lnc-C5orf32-3	6.560320917	2.215649903	14.11561855	9.19E-08	4.43E-06	8.446020294	chr5	+	139554772	139661637	Sense	Up
lnc-C5orf35-1	5.280545624	0.90693858	12.1613636	3.61E-07	1.35E-05	7.152977141	chr5	+	56237133	56242979	Antisense	Up
lnc-C5orf35-3	6.963473325	3.214515202	17.66885154	1.13E-08	9.01E-07	10.22080131	chr5	+	56223700	56225400	Antisense	Up
lnc-C5orf39-1	5.532238967	5.666387878	4.529010052	0.00119612	0.013074478	-0.91492141	chr5	-	43013700	43082842	Sense	Up
lnc-C5orf39-3	7.192184592	3.334747031	19.65785698	4.15E-09	4.36E-07	10.97582636	chr5	-	43050279	43054670	Intergenic	Up
lnc-C5orf45-1	7.279225359	5.339935454	7.584634962	2.29E-05	0.000440783	3.13994132	chr5	-	179264142	179289173	Sense	Up
lnc-C5orf49-1	4.736349758	1.974816196	19.06244132	5.55E-09	5.41E-07	10.57770024	chr5	-	7707914	7749879	Antisense	Up
lnc-C5orf63-2	3.460737034	5.239728386	4.602111036	0.001071967	0.011980416	-0.701570688	chr5	-	126567724	126618000	Intergenic	Up
lnc-C6orf105-5	5.313855129	4.070169968	6.087919265	0.000136322	0.002078275	1.333596271	chr6	-	12007816	12009073	Intergenic	Up
lnc-C6orf108-1	6.809014975	3.902346714	18.74915588	6.49E-09	6.03E-07	10.64973825	chr6	-	43181538	43191598	Antisense	Up
lnc-C6orf112-8	5.904372247	3.452751472	9.017814257	5.21E-06	0.000124899	4.625367831	chr6	+	105726890	105729630	Antisense	Up
lnc-C6orf146-3	-4.90544664	1.092883362	-9.975912478	2.14E-06	5.88E-05	5.443926435	chr6	-	3898391	3913082	Intergenic	Down
lnc-C6orf146-4	4.894526271	3.837056616	4.415655171	0.001419812	0.015105054	-1.085845718	chr6	-	4049127	4087566	Sense	Up
lnc-C6orf164-2	-5.939819238	1.245225437	-9.171911255	4.49E-06	0.000110356	4.772877129	chr6	+	88089750	88100391	Intergenic	Down
lnc-C6orf195-14	5.150460543	0.937568145	12.34515823	3.15E-07	1.21E-05	7.261602543	chr6	-	2481106	2488536	Intergenic	Up
lnc-C6orf201-11	-5.340448559	1.304184325	-6.259967396	0.000109497	0.00172542	1.613476619	chr6	+	4198786	4208376	Intergenic	Down
lnc-C6orf201-18	-4.645765022	0.927910174	-10.6733307	1.17E-06	3.57E-05	5.980958998	chr6	+	4306476	4316060	Intergenic	Down
lnc-C6orf52-1	5.865262985	1.795407114	8.483368111	8.84E-06	0.000194453	4.111465672	chr6	-	10582718	10586721	Intron	Up
lnc-C6orf99-7	6.122717807	6.370604576	5.705229643	0.000225111	0.003194554	0.810973304	chr6	+	159420275	159462085	Antisense	Up
lnc-C7orf10-4	2.722096579	6.319677291	8.540240123	8.35E-06	0.000185137	4.125455419	chr7	+	40172587	40174207	Antisense	Up
lnc-C7orf23-2	4.11904657	3.233891831	4.793643668	0.000807349	0.009457738	-0.446097928	chr7	-	86792599	86812767	Antisense	Up
lnc-C7orf45-1	5.182201723	2.212284036	9.886834022	2.32E-06	6.28E-05	5.413495161	chr7	+	129813557	129845201	Antisense	Up
lnc-C7orf71-4	6.362226691	4.040325961	8.069747868	1.36E-05	0.000282383	3.687294588	chr7	+	26707002	26708086	Intron	Up
lnc-C8orf22-13	-2.624818	0.4894221	-4.296768	0.001702816	0.01763146	-1.198748	chr8	+	49665513	49669734	Intergenic	Down
lnc-C8orf42-4	7.800443461	4.471899789	9.015435408	5.22E-06	0.000124971	4.62170207	chr8	-	400713	401343	Antisense	Up
lnc-C8orf48-7	-5.707110892	1.258794739	-9.175506959	4.48E-06	0.000110043	4.77324399	chr8	+	13240453	13244634	Intron	Down
lnc-C8orf56-3	7.499332411	4.496450108	13.11730027	1.81E-07	7.74E-06	7.83264263	chr8	-	104032414	104033656	Antisense	Up
lnc-C8orf83-1	-3.076171	0.5547557	-3.90893	0.003122738	0.0291184	-1.834943	chr8	-	93646855	93736971	Sense	Down
lnc-C9orf103-7	7.27231791	4.57345867	12.04706972	3.93E-07	1.44E-05	7.108007562	chr9	+	85634339	85642318	Antisense	Up
lnc-C9orf152-5	6.014347	2.682612843	13.24517274	1.65E-07	7.20E-06	7.919814141	chr9	-	112932548	112938715	Antisense	Up
lnc-C9orf3-5	4.221746949	5.742955004	7.787078631	1.84E-05	0.000366105	3.400955584	chr9	+	98153010	98159579	Intergenic	Up
lnc-C9orf3-6	6.248164575	3.237259927	9.721100097	2.70E-06	7.13E-05	5.27357368	chr9	+	98207059	98208373	Intron	Up
lnc-C9orf43-1	8.566722002	5.480247844	9.563191684	3.11E-06	8.08E-05	5.131932453	chr9	+	116170092	116170786	Intron	Up
lnc-C9orf50-2	2.740347453	7.729124539	7.552261942	2.37E-05	0.00045327	3.130095025	chr9	-	132262771	132270807	Antisense	Up
lnc-C9orf57-3	7.674508891	3.614405227	14.07413778	9.44E-08	4.53E-06	8.424390066	chr9	-	74598216	74600973	Intergenic	Up
lnc-C9orf66-7	3.603343	1.671914	3.60361	0.00510245	0.04316132	-2.356326	chr9	-	503056	504746	Intron	Up
lnc-CAB39L-4	3.891269748	2.121060522	6.478469243	8.34E-05	0.001359098	1.835410113	chr13	-	49516046	49554130	Antisense	Up
lnc-CACNA2D3-2	-4.239639498	0.790279511	-7.008406293	4.41E-05	0.000777737	2.529308242	chr3	+	55330227	55334766	Intergenic	Down
lnc-CACNG1-1	5.535252	2.096964	4.256756	0.001811038	0.0185818	-1.269134	chr17	+	65097730	65136087	Antisense	Up
lnc-CALHM1-1	-4.904598847	1.003993303	-14.56753175	6.86E-08	3.51E-06	8.345947198	chr10	-	105209781	105212148	Sense	Down
lnc-CAMKMT-1	-5.615026698	1.216306238	-9.929622314	2.23E-06	6.07E-05	5.445842426	chr2	+	45035306	45049401	Intergenic	Down
lnc-CAP1-1	-4.710115	0.9052963	-4.111789	0.00226821	0.02225688	-1.567751	chr1	+	40466544	40481707	Intergenic	Down
lnc-CAPN13-1	5.125977428	2.380272828	7.655629162	2.12E-05	0.000412532	3.219008575	chr2	-	30670138	30864109	Antisense	Up
lnc-CAPN2-2	5.281310854	2.7448528	8.365366052	9.97E-06	0.000216593	3.976450518	chr1	+	223954928	224006568	Sense	Up
lnc-CASKIN2-1	2.946778	5.378389	4.078491	0.002389527	0.02325091	-1.479446	chr17	-	73517264	73521464	Antisense	Up
lnc-CBR1-1	5.945463873	2.93306578	18.34160061	7.98E-09	7.03E-07	10.49834776	chr21	+	37432729	37436706	Intergenic	Up
lnc-CBWD5-2	-2.096322	0.2202964	-3.501422	0.006028401	0.04951173	-2.563814	chr9	-	70457086	70497240	Sense	Down
lnc-CBY3-3	6.764601746	3.645910008	15.24301497	4.51E-08	2.55E-06	9.037390706	chr5	-	179157348	179157681	Antisense	Up
lnc-CCDC125-22	9.145623214	5.324687733	14.75946275	6.08E-08	3.21E-06	8.773115677	chr5	-	67595895	67597636	Antisense	Up
lnc-CCDC127-2	-3.928963264	0.579993756	-7.534483203	2.42E-05	0.000460617	3.096367063	chr5	-	26321	37720	Intergenic	Down
lnc-CCDC148-1	7.17081723	3.28400819	18.28861525	8.20E-09	7.16E-07	10.48509414	chr2	-	159514848	159591514	Antisense	Up
lnc-CCDC152-2	8.408873883	3.17617796	25.32963624	3.75E-10	1.08E-07	12.70174447	chr5	+	42806495	42807099	Antisense	Up
lnc-CCDC159-1	4.068993	5.252229	3.849284	0.003434025	0.03142546	-1.988382	chr19	+	11455370	11457142	Antisense	Up
lnc-CCDC159-4	6.384997	9.586496	4.32208	0.001637909	0.01704379	-1.231798	chr19	+	11432831	11434871	Antisense	Up
lnc-CCDC23-1	7.053986655	5.781490052	5.093808533	0.000523276	0.006548149	-0.049403515	chr1	-	43300351	43312093	Antisense	Up
lnc-CCDC43-5	4.169079776	1.562919265	4.501836859	0.001246095	0.013507756	-0.909838267	chr17	-	42810564	42814372	Antisense	Up
lnc-CCDC51-1	7.144703131	5.945950851	9.939378131	2.21E-06	6.03E-05	5.465207741	chr3	-	48481761	48488036	Antisense	Up
lnc-CCDC68-1	10.32299356	6.627837143	20.37226631	2.96E-09	3.63E-07	11.21450454	chr18	-	52553096	52565314	Antisense	Up
lnc-CCDC7-2	6.133435787	5.802983968	6.647349998	6.78E-05	0.001134068	2.04021556	chr10	+	32635426	32636107	Antisense	Up
lnc-CCDC70-2	5.025666584	1.980515924	6.852383518	5.30E-05	0.000912117	2.287631064	chr13	+	52506090	52508047	Antisense	Up
lnc-CCDC83-1	9.364252705	4.407682578	33.09403732	2.92E-11	3.31E-08	13.14037598	chr11	+	85718320	85725382	Antisense	Up
lnc-CCDC85C-2	5.090837	4.177078	4.253244	0.001820879	0.01863704	-1.346845	chr14	-	99966516	99968335	Antisense	Up
lnc-CCL27-1	5.277742599	1.657294446	12.91480863	2.08E-07	8.64E-06	7.702950407	chr9	-	34661876	34666171	Sense	Up
lnc-CCM2-2	6.631590131	4.819920278	6.369084889	9.55E-05	0.001533439	1.686918299	chr7	+	45022561	45023645	Antisense	Up
lnc-CCNB1IP1-2	4.294576923	1.943925828	13.48389716	1.40E-07	6.27E-06	8.04806331	chr14	-	20812391	20815047	Antisense	Up
lnc-CCNE2-1	3.28038076	1.221316516	5.067486499	0.000543275	0.006749948	-0.048398922	chr8	-	95803870	95806064	Antisense	Up
lnc-CCNI-3	5.67982621	1.13298668	15.21409058	4.59E-08	2.58E-06	8.912596375	chr4	-	78048353	78089429	Antisense	Up
lnc-CCNYL2-9	-5.902054874	3.391190335	-5.390012976	0.000345456	0.004606923	0.367658348	chr10	-	42596696	42598801	Intergenic	Down
lnc-CCRN4L-14	7.44404346	2.836672377	18.26322884	8.31E-09	7.19E-07	10.4268799	chr4	+	140037802	140046484	Antisense	Up
lnc-CCT6B-4	6.318585174	4.739151417	4.825019518	0.000771101	0.009114809	-0.463350854	chr17	-	33334264	33335251	Intergenic	Up
lnc-CD151-2	5.950223088	2.010588013	14.51212532	7.11E-08	3.61E-06	8.671910506	chr11	+	838179	839831	Sense	Up
lnc-CD226-5	-5.955127552	1.318035418	-9.32100746	3.90E-06	9.80E-05	4.909471703	chr18	-	67338179	67397172	Antisense	Down
lnc-CD2BP2-1	3.814434786	0.6575726	4.501238021	0.001247221	0.013516459	-0.92921119	chr16	-	30370096	30371497	Sense	Up
lnc-CD37-1	5.07857	4.671058	4.345813	0.001579425	0.01652155	-1.196848	chr19	+	49843851	49846592	Sense	Up
lnc-CD47-7	4.168779115	1.455540802	4.523788476	0.001205555	0.013163847	-0.881610053	chr3	-	106967220	106970678	Intron	Up
lnc-CD53-2	5.63928932	2.269375408	16.29602528	2.42E-08	1.60E-06	9.559728427	chr1	+	111505923	111507271	Antisense	Up
lnc-CD72-1	3.926543	3.145624	3.981965	0.002781467	0.02650347	-1.768261	chr9	-	35603191	35605280	Intergenic	Up
lnc-CD80-2	4.644113276	3.055758051	5.737387154	0.000215654	0.003087602	0.869855491	chr3	-	119298058	119298497	Antisense	Up
lnc-CDC42SE1-1	5.464295892	1.791978003	10.57748142	1.27E-06	3.81E-05	5.983455777	chr1	-	151028058	151043079	Sense	Up
lnc-CDCP2-1	3.140830672	0.227018837	7.926581035	1.58E-05	0.000321385	3.535990982	chr1	-	54565640	54565897	Intergenic	Up
lnc-CDH11-2	-4.033949	0.6638793	-3.635226	0.004847013	0.04141948	-2.347806	chr16	-	65224875	65310258	Intergenic	Down
lnc-CDH18-7	-5.579178222	1.496715991	-5.263949616	0.000411603	0.005336165	0.189171165	chr5	-	19467101	19471509	Intergenic	Down
lnc-CDIPT-1	3.423194592	12.229511	6.133387324	0.000128603	0.001980962	1.396405011	chr16	-	29819965	29832573	Antisense	Up
lnc-CDK1-3	5.454687427	5.269959564	4.388893379	0.001478851	0.015625833	-1.120740733	chr10	+	61815631	61820501	Antisense	Up
lnc-CDK12-1	-4.767175624	1.180131803	-4.941779395	0.000650747	0.007886087	-0.210079014	chr17	+	37700243	37723895	Intergenic	Down
lnc-CDK12-2	9.474259578	3.74509398	38.10823878	7.56E-12	2.91E-08	14.71520459	chr17	+	37558045	37562486	Antisense	Up
lnc-CDK20-12	6.581730215	3.237641118	11.17038794	7.80E-07	2.53E-05	6.462632012	chr9	-	90999792	91002839	Intergenic	Up
lnc-CDK20-4	-4.261485	0.7369589	-4.157822	0.002111088	0.02104596	-1.494187	chr9	-	90717700	90728354	Intergenic	Down
lnc-CDKL1-1	5.633572404	2.776525505	14.61838098	6.64E-08	3.43E-06	8.726581309	chr14	-	50793243	50794627	Intergenic	Up
lnc-CDR2-1	3.682652031	6.835614591	6.330978702	0.000100141	0.001596035	1.713273678	chr16	-	22295905	22300059	Antisense	Up
lnc-CDYL-10	-4.570522	0.7576197	-3.74902	0.004032831	0.03571729	-2.157785	chr6	+	4633461	4639582	Intergenic	Down
lnc-CDYL2-6	-4.34928887	1.06799897	-4.320755606	0.001641239	0.017074188	-1.165844293	chr16	-	80188949	80597032	Sense	Down
lnc-CEBPG-4	4.345792	7.461654	4.11516	0.002256296	0.02216597	-1.511049	chr19	+	33790839	33792074	Antisense	Up
lnc-CELF3-2	6.315554767	5.375541556	4.628788405	0.001030138	0.011599728	-0.759081559	chr1	-	151670318	151670850	Antisense	Up
lnc-CEMP1-10	9.904123877	5.573778313	23.34429377	8.16E-10	1.60E-07	12.11900443	chr16	-	2651151	2663417	Antisense	Up
lnc-CEMP1-5	3.211874926	8.742696686	8.750390094	6.77E-06	0.000154403	4.372500236	chr16	-	2647881	2649719	Antisense	Up
lnc-CENPT-1	3.342284	4.681764	3.557467	0.005500726	0.04601838	-2.400729	chr16	-	67867791	67881714	Sense	Up
lnc-CGNL1-3	-3.878033	0.6166318	-3.847059	0.00344625	0.03150287	-1.996349	chr15	+	57846152	57847878	Intergenic	Down
lnc-CHAC1-4	7.45372319	3.655336051	15.54610563	3.75E-08	2.20E-06	9.23043487	chr15	+	41309004	41320091	Antisense	Up
lnc-CHAC2-5	5.292023	6.687729	3.842244	0.003472859	0.03169069	-1.98666	chr2	+	53927405	53941719	Antisense	Up
lnc-CHAD-3	8.109158134	5.106686233	20.14750959	3.29E-09	3.78E-07	11.04077918	chr17	-	48614654	48616115	Antisense	Up
lnc-CHADL-1	4.695825788	6.374633283	6.976183531	4.58E-05	0.000803596	2.489292437	chr22	-	41605685	41613627	Antisense	Up
lnc-CHADL-3	8.241615055	3.142486812	30.10604497	7.22E-11	5.12E-08	13.65331488	chr22	-	41565193	41579148	Antisense	Up
lnc-CHD2-3	-4.40229294	1.423195906	-10.75756184	1.09E-06	3.36E-05	6.093365567	chr15	+	93670410	93852093	Intergenic	Down
lnc-CHMP4C-1	4.312591207	2.370249632	10.58170606	1.27E-06	3.80E-05	6.005528508	chr8	+	82608602	82610929	Intergenic	Up
lnc-CHMP4C-2	5.495886841	0.984494457	14.80188153	5.92E-08	3.14E-06	8.720400109	chr8	+	82704057	82727949	Antisense	Up
lnc-CHRAC1-3	4.765571	4.921764	3.823271	0.003579833	0.03251079	-2.008993	chr8	+	141535726	141536260	Intergenic	Up
lnc-CHRAC1-7	7.125052685	4.34963685	9.144128572	4.61E-06	0.000112857	4.746942039	chr8	+	141278780	141297937	Antisense	Up
lnc-CHRNA3-5	7.829112996	3.780511034	21.09443385	2.13E-09	2.87E-07	11.51930053	chr15	-	78792407	78792890	Antisense	Up
lnc-CHRNA4-4	-4.687978558	1.402894494	-5.027773981	0.000575014	0.007081171	-0.110439186	chr20	-	62002104	62009753	Antisense	Down
lnc-CHRNA5-3	-5.433943728	1.139002617	-6.997498887	4.47E-05	0.000785742	2.473858762	chr15	+	78952985	79025225	Intergenic	Down
lnc-CHRNA9-2	9.885819988	4.907539843	32.51676129	3.46E-11	3.36E-08	13.96186594	chr4	+	40428135	40429602	Intron	Up
lnc-CHST12-1	-3.898452	1.201924	-3.618083	0.00498382	0.04234627	-2.355751	chr7	+	2477226	2488305	Sense	Down
lnc-CHST7-2	6.879260252	3.370841417	16.74837425	1.87E-08	1.31E-06	9.802067785	chrX	+	46464683	46465404	Intron	Up
lnc-CHSY1-5	3.023649081	10.96395411	7.631401373	2.17E-05	0.000422676	3.210913047	chr15	-	101433944	101459488	Antisense	Up
lnc-CHSY1-6	7.581660569	2.867136789	23.78337839	6.84E-10	1.50E-07	12.26653079	chr15	-	101456346	101456828	Antisense	Up
lnc-CIB1-3	3.130138027	8.663317656	5.650473131	0.000242256	0.003397508	0.798638415	chr15	-	90814472	90815809	Antisense	Up
lnc-CIB3-1	4.573711567	8.275784985	5.807756579	0.000196422	0.002844377	1.016507322	chr19	-	16243380	16250631	Antisense	Up
lnc-CKAP4-1	4.580085486	2.301942075	13.12772956	1.79E-07	7.70E-06	7.84279686	chr12	-	106750751	106751719	Antisense	Up
lnc-CKS1B-2	6.486731506	1.461247836	8.573543063	8.07E-06	0.000180271	4.200360451	chr1	+	154934300	154935099	Antisense	Up
lnc-CLASP2-1	3.591897301	7.036995943	7.183949455	3.60E-05	0.00065153	2.739091057	chr3	-	33835043	33840555	Antisense	Up
lnc-CLASP2-5	-3.889962	0.8198573	-3.822683	0.003583201	0.03252725	-2.036263	chr3	-	33813683	33815559	Intergenic	Down
lnc-CLDN15-2	4.539334112	0.701480353	8.963998764	5.49E-06	0.000130277	4.577244131	chr7	-	100860703	100861647	Sense	Up
lnc-CLDN6-4	4.896101596	3.295028875	8.704763828	7.08E-06	0.000160762	4.322913168	chr16	-	3022793	3030474	Sense	Up
lnc-CLLU1.1-1	-4.390409363	0.967906581	-5.283178236	0.000400691	0.005218721	0.224270821	chr12	+	92815306	92885867	Sense	Down
lnc-CLMP-8	-3.746711068	1.066740085	-5.49665909	0.000298393	0.004051653	0.545536543	chr11	-	123237667	123243374	Intergenic	Down
lnc-CLRN2-1	5.016524022	4.379458898	5.626376276	0.000250242	0.003490777	0.7212609	chr4	+	17484657	17541243	Sense	Up
lnc-CLUAP1-2	4.718690259	1.377462684	8.195665926	1.19E-05	0.000251492	3.818302221	chr16	+	3601780	3633267	Antisense	Up
lnc-CLVS1-1	-5.884486044	1.603278751	-20.87840273	2.35E-09	3.06E-07	11.20895762	chr8	+	61822244	61940024	Antisense	Down
lnc-CMBL-5	6.092310205	7.648025885	4.583217262	0.001102683	0.012251671	-0.814630682	chr5	-	10264708	10267258	Antisense	Up
lnc-CNDP1-1	5.870239582	2.001197535	16.72320895	1.90E-08	1.33E-06	9.791325001	chr18	+	72259009	72262618	Antisense	Up
lnc-CNIH3-2	-6.946639147	2.588405163	-12.15278124	3.63E-07	1.36E-05	7.13946074	chr1	+	224622361	224918276	Sense	Down
lnc-CNOT7-1	-4.959675135	1.014360513	-10.5771867	1.27E-06	3.81E-05	5.929265846	chr8	-	17028530	17034318	Intron	Down
lnc-COBL-2	-4.31438	0.7409601	-3.607486	0.005070396	0.0429336	-2.359157	chr7	-	52232930	52260609	Intergenic	Down
lnc-COG3-2	6.06173912	5.681940894	7.458107444	2.64E-05	0.000496351	3.039099189	chr13	+	45976256	45983407	Antisense	Up
lnc-COG8-1	2.491736132	8.845230642	7.377953792	2.88E-05	0.000537063	2.927525244	chr16	-	69354042	69362569	Sense	Up
lnc-COIL-2	4.595376615	1.368215896	16.64067694	1.99E-08	1.36E-06	9.648486962	chr17	-	55148882	55162434	Intergenic	Up
lnc-COL28A1-1	4.798975	4.627624	3.914106	0.003097158	0.02895465	-1.885673	chr7	-	7589263	7606627	Sense	Up
lnc-COL4A4-2	-4.290214	1.522725	-4.177764	0.002046632	0.02056516	-1.393574	chr2	-	227800729	227898124	Sense	Down
lnc-COL8A2-3	4.148274981	1.349370286	4.969653546	0.000625092	0.007614911	-0.19793876	chr1	-	36457709	36479231	Antisense	Up
lnc-COMMD1-1	8.893984116	4.750527093	15.27317027	4.42E-08	2.51E-06	9.00818955	chr2	+	62095566	62113217	Antisense	Up
lnc-COMMD5-1	4.222275	5.539301	4.110412	0.002273095	0.02229728	-1.53677	chr8	-	146063400	146067770	Antisense	Up
lnc-COQ9-1	4.652974917	4.754057898	8.148228278	1.25E-05	0.000262253	3.752750862	chr16	+	57477061	57481271	Antisense	Up
lnc-CORIN-2	2.352173	2.301298	3.69847	0.004375275	0.03818413	-2.212721	chr4	-	47558747	47562276	Antisense	Up
lnc-COTL1-2	8.178360706	4.343968205	18.41779885	7.67E-09	6.83E-07	10.52213541	chr16	-	84811929	84817884	Antisense	Up
lnc-CPLX1-2	2.488128158	8.333225802	10.46662686	1.40E-06	4.11E-05	5.909103737	chr4	-	755336	775637	Sense	Up
lnc-CPLX1-3	7.004369346	4.498307805	10.67996448	1.17E-06	3.55E-05	6.085047677	chr4	-	758274	758862	Antisense	Up
lnc-CPM-1	8.88044255	4.055473355	18.62080112	6.92E-09	6.33E-07	10.5842423	chr12	-	69235067	69237017	Antisense	Up
lnc-CPM-2	5.586109164	2.546255038	12.00196295	4.07E-07	1.48E-05	7.087377863	chr12	-	69068150	69081535	Sense	Up
lnc-CPM-3	8.311843431	5.351416498	7.567070455	2.33E-05	0.000447121	3.120010094	chr12	-	69043343	69054300	Intergenic	Up
lnc-CPNE5-1	-3.73291	1.174387	-3.66406	0.004625673	0.03995687	-2.249873	chr6	-	36807549	36816400	Intergenic	Down
lnc-CPSF4-1	4.7012204	1.730071287	5.0809086	0.000532977	0.006637768	-0.036053043	chr7	+	99070557	99079949	Sense	Up
lnc-CPT2-3	7.160328703	3.599454117	13.79106509	1.14E-07	5.29E-06	8.239443419	chr1	+	53703370	53708506	Sense	Up
lnc-CPVL-4	4.072520689	0.681229036	4.786162218	0.000816258	0.009548729	-0.461727161	chr7	-	29553839	29603286	Antisense	Up
lnc-CRBN-1	-3.859574809	0.809954869	-7.584545643	2.29E-05	0.000440783	3.185130656	chr3	-	3292370	3668980	Intergenic	Down
lnc-CREG1-2	5.295166521	2.460809644	21.058382	2.17E-09	2.90E-07	11.50760366	chr1	-	167426619	167427898	Intron	Up
lnc-CREM-6	7.66956988	3.857698825	15.29947612	4.35E-08	2.48E-06	9.052598119	chr10	+	34398808	34399990	Intron	Up
lnc-CRHR1-5	9.590030489	4.708249475	23.45975846	7.79E-10	1.59E-07	12.09347679	chr17	+	43596137	43596388	Antisense	Up
lnc-CRHR1-6	6.861182091	3.906839619	11.72624438	5.02E-07	1.76E-05	6.877971262	chr17	+	43585421	43587781	Antisense	Up
lnc-CRHR1-7	4.666668894	2.652131371	4.925826409	0.000665934	0.008056126	-0.215833508	chr17	+	43662369	43665981	Intergenic	Up
lnc-CRIPT-1	-4.273923	0.7597702	-4.164883	0.002088023	0.02086077	-1.482837	chr2	+	46865335	46903291	Intergenic	Down
lnc-CROCC-2	5.574691067	1.162635777	12.00542031	4.06E-07	1.48E-05	7.046062561	chr1	+	17305420	17331586	Antisense	Up
lnc-CS-1	5.034414081	0.836558106	10.29707538	1.62E-06	4.63E-05	5.756697023	chr12	-	56661576	56663888	Antisense	Up
lnc-CSMD1-18	6.108982459	2.823119827	13.64464599	1.26E-07	5.72E-06	8.154358614	chr8	-	1906703	1909149	Antisense	Up
lnc-CSMD1-7	3.983486288	1.662759899	14.67980216	6.39E-08	3.33E-06	8.486573081	chr8	-	1920735	1922803	Intron	Up
lnc-CSNK1A1-1	4.196224301	2.274136566	8.666272348	7.36E-06	0.000166142	4.288935241	chr5	-	149016982	149020628	Intergenic	Up
lnc-CSNK1A1-7	8.601429485	3.98033589	37.16957686	9.60E-12	2.91E-08	14.66812398	chr5	-	148997110	149001021	Antisense	Up
lnc-CSNK1G2-4	3.619948387	6.762455349	6.998030015	4.46E-05	0.000785584	2.528819653	chr19	+	1989399	1990369	Antisense	Up
lnc-CST7-1	5.07436	2.471405	3.731641	0.004147282	0.03657602	-2.182611	chr20	+	24911271	24913594	Intergenic	Up
lnc-CTA-299D3.8.1-8	-3.793468	0.7340784	-3.790494	0.003772851	0.03383237	-2.011778	chr22	-	48934711	48943199	Sense	Down
lnc-CTC-203F4.1.1-3	-4.083044812	0.945872	-4.854063142	0.000739093	0.008786125	-0.409318514	chr5	+	134734969	134738305	Antisense	Down
lnc-CTD-2210P24.4.1-8	-4.191888	3.337253	-3.549731	0.005570612	0.04650999	-2.435281	chr11	+	45693468	45722570	Antisense	Down
lnc-CTD-2215E18.1.1-7	4.318634926	1.453685316	5.55320044	0.00027628	0.003799504	0.673590472	chr5	+	98105139	98108679	Sense	Up
lnc-CTD-2368P22.1.1-2	4.966313922	0.848741632	8.643052776	7.53E-06	0.000169581	4.266879932	chr19	+	58447339	58451650	Intergenic	Up
lnc-CTNS-1	3.023205093	8.441075084	15.70095201	3.42E-08	2.06E-06	9.266340444	chr17	+	3566188	3567184	Antisense	Up
lnc-CTRB1-2	6.162645131	2.638192292	15.90301636	3.04E-08	1.90E-06	9.366498314	chr16	+	75170863	75263637	Sense	Up
lnc-CTRL-2	2.718724939	6.344314918	6.153816145	0.00012529	0.001936348	1.536486136	chr16	-	67961542	67963577	Sense	Up
lnc-CTSZ-7	7.191441641	3.118137692	14.00254646	9.90E-08	4.70E-06	8.381744919	chr20	-	57486023	57486241	Antisense	Up
lnc-CTU2-2	3.619163349	1.110342582	6.267195274	0.000108503	0.001711044	1.589482518	chr16	+	88762908	88765018	Antisense	Up
lnc-CXADR-1	5.131194633	2.112850859	10.12867164	1.87E-06	5.24E-05	5.595545622	chr21	+	19165804	19183162	Antisense	Up
lnc-CXCL16-1	5.990615171	5.481550404	5.229420812	0.000432007	0.005552229	0.139831675	chr17	-	4635050	4635666	Antisense	Up
lnc-CXorf58-2	4.531125896	1.39781997	6.819799473	5.51E-05	0.000944303	2.277359414	chrX	+	24001724	24002923	Antisense	Up
lnc-CYB561-5	5.024715748	1.725132567	7.247028611	3.35E-05	0.00061086	2.780900577	chr17	-	61271290	61416414	Antisense	Up
lnc-CYB5D2-2	9.333204486	4.627054992	18.99842901	5.73E-09	5.51E-07	10.77273856	chr17	+	4067203	4068007	Intron	Up
lnc-CYB5R2-3	-6.564472296	2.272834304	-18.86881347	6.11E-09	5.80E-07	10.72210495	chr11	-	7405072	7534884	Sense	Down
lnc-CYB5R2-5	6.72941215	4.225251539	10.86930058	9.97E-07	3.12E-05	6.235875673	chr11	-	7652032	7656476	Antisense	Up
lnc-CYFIP1-3	5.071682153	1.451755898	12.49229121	2.82E-07	1.11E-05	7.423146371	chr15	+	23096868	23099971	Antisense	Up
lnc-CYFIP1-5	2.915324041	5.962274221	7.298465355	3.16E-05	0.000580651	2.862935281	chr15	+	23032648	23171714	Antisense	Up
lnc-CYLC2-4	2.385087	0.3467386	3.880693	0.003266237	0.03017391	-1.861892	chr9	+	105947253	105968844	Antisense	Up
lnc-CYP2C18-1	-4.080935	0.6112036	-3.720437	0.004222871	0.03710201	-2.187043	chr10	+	96372043	96373661	Intergenic	Down
lnc-CYS1-5	5.208756635	1.656066592	16.14168195	2.64E-08	1.70E-06	9.529160106	chr2	-	10194547	10194993	Antisense	Up
lnc-CYTH4-4	6.290463285	3.600079736	16.48886828	2.17E-08	1.45E-06	9.643338942	chr22	+	37767723	37769038	Intron	Up
lnc-DALRD3-1	8.191339048	5.387163995	9.866285856	2.36E-06	6.36E-05	5.400465128	chr3	-	49022481	49027421	Antisense	Up
lnc-DALRD3-2	4.336456269	7.035984075	7.268259755	3.27E-05	0.000598066	2.83249726	chr3	-	49017350	49021925	Antisense	Up
lnc-DAPP1-1	6.048991	8.309901	3.808501	0.003665496	0.03311616	-2.06	chr4	+	100871162	100887550	Sense	Up
lnc-DBNDD1-1	5.332006003	2.276978122	10.80478319	1.05E-06	3.26E-05	6.181792505	chr16	-	90061105	90062978	Intron	Up
lnc-DCAF10-1	2.414398	3.125298	3.793818	0.003752786	0.03371542	-1.986391	chr9	+	37789033	37964689	Sense	Up
lnc-DCAF6-1	4.172478	9.833477	4.336352	0.001602469	0.01672077	-1.204178	chr1	+	167905020	167960577	Sense	Up
lnc-DDHD2-1	4.629072	3.130793	4.093306	0.002334728	0.02281324	-1.579126	chr8	+	38133405	38134198	Antisense	Up
lnc-DDX19B-2	7.091315064	3.562119284	22.83798015	1.00E-09	1.86E-07	12.00276176	chr16	+	70273802	70282018	Intergenic	Up
lnc-DDX27-3	7.044195943	4.183793694	12.96724306	2.01E-07	8.37E-06	7.729235337	chr20	+	47785507	47790864	Antisense	Up
lnc-DDX51-2	5.34733472	1.733174544	6.542101631	7.71E-05	0.001267124	1.936035838	chr12	-	132562347	132565005	Intergenic	Up
lnc-DDX54-1	6.460773485	4.408210058	12.71439077	2.40E-07	9.74E-06	7.569742059	chr12	-	113623428	113629966	Antisense	Up
lnc-DEGS2-6	3.597635543	6.838474753	4.560142226	0.001141472	0.012572423	-0.752743748	chr14	-	100610053	100613761	Sense	Up
lnc-DENND2D-1	4.503735448	0.661371621	10.47688404	1.39E-06	4.08E-05	5.903194612	chr1	-	111727036	111727683	Antisense	Up
lnc-DENND4C-1	4.960780981	2.1724656	14.45326879	7.38E-08	3.71E-06	8.473871147	chr9	+	19375448	19375994	Intergenic	Up
lnc-DHRS7B-1	-3.892472	0.555882	-3.89431	0.003196188	0.0296644	-1.880033	chr17	+	21117643	21133348	Antisense	Down
lnc-DHRS7B-3	3.470706175	7.767829365	5.043205794	0.000562451	0.006955135	0.030493647	chr17	+	20903059	20903636	Intron	Up
lnc-DHX15-1	-5.09886882	1.62620443	-6.690745834	6.43E-05	0.001082957	2.154680747	chr4	-	24427775	24526490	Sense	Down
lnc-DHX36-3	6.383668	5.897263	4.235987	0.001870061	0.01905184	-1.364584	chr3	-	153971974	153977399	Antisense	Up
lnc-DHX38-4	4.732523156	0.857220835	9.296742087	3.99E-06	9.99E-05	4.88457767	chr16	+	72779299	72825522	Intron	Up
lnc-DHX57-1	5.515838999	0.988196647	13.15444187	1.76E-07	7.59E-06	7.796837792	chr2	-	39010341	39012094	Intergenic	Up
lnc-DISC1-1	-5.193824714	1.122682945	-8.770718913	6.63E-06	0.000151661	4.387502203	chr1	+	232254254	232322542	Intergenic	Down
lnc-DKK3-1	4.686742324	4.028020069	5.043452027	0.000562253	0.006954742	-0.133562141	chr11	-	12282972	12284720	Intergenic	Up
lnc-DKK4-5	5.801410579	3.733195322	9.603028915	3.00E-06	7.82E-05	5.167853172	chr8	-	42329856	42396854	Sense	Up
lnc-DLEU7-5	6.706497478	2.863866656	20.70151275	2.55E-09	3.28E-07	11.3836481	chr13	-	51508739	51522354	Antisense	Up
lnc-DLX2-3	5.588858502	3.395267105	18.04437284	9.30E-09	7.74E-07	10.29288178	chr2	-	173328989	173330750	Antisense	Up
lnc-DNAH5-4	-5.271471139	1.17168751	-8.369538507	9.93E-06	0.000216004	3.997625382	chr5	-	13991053	13997879	Intergenic	Down
lnc-DNAJA1-1	6.818358883	3.568061418	22.47021284	1.17E-09	2.02E-07	11.69217502	chr9	+	33044447	33045593	Intron	Up
lnc-DNAJA1-2	-2.513673	0.5939993	-4.349033	0.001571663	0.01646094	-1.183777	chr9	+	33019475	33024180	Intergenic	Down
lnc-DNAJA4-1	7.608316069	4.618628625	19.94719433	3.62E-09	4.03E-07	10.77264715	chr15	+	78585627	78588391	Antisense	Up
lnc-DNAJC5B-1	7.273563968	4.233056889	14.15212961	8.97E-08	4.34E-06	8.325611382	chr8	+	66620124	66640838	Antisense	Up
lnc-DNASE1L1-1	3.734732897	11.1170654	10.00329996	2.09E-06	5.76E-05	5.506149409	chrX	-	153625218	153627157	Antisense	Up
lnc-DNASE1L2-1	4.667775704	2.037124936	17.95334046	9.76E-09	7.98E-07	10.35221799	chr16	+	2290487	2291819	Intron	Up
lnc-DOC2B-3	-3.410261627	0.660229847	-6.031103242	0.000146678	0.002216115	1.284164148	chr17	-	128327	185813	Sense	Down
lnc-DONSON-1	5.203989636	6.600108151	4.98580695	0.000610722	0.007468131	-0.218042015	chr21	-	34931847	34950669	Sense	Up
lnc-DPCD-3	6.762376457	3.869325718	15.19638466	4.64E-08	2.59E-06	9.03756516	chr10	+	103330316	103356408	Sense	Up
lnc-DPP4-2	5.630478037	4.81346766	4.777809131	0.000826329	0.00963689	-0.531316656	chr2	-	162079295	162164782	Sense	Up
lnc-DPY30-4	-4.043258	0.8979777	-3.913751	0.003098906	0.02896075	-1.86716	chr2	-	32070220	32092722	Intergenic	Down
lnc-DR1-1	5.624688845	3.265936431	8.177777281	1.21E-05	0.000255301	3.790854108	chr1	+	93795118	93805355	Antisense	Up
lnc-DR1-2	2.298396	0.6994894	3.912437	0.003105381	0.028995	-1.84705	chr1	+	93830112	93838174	Intergenic	Up
lnc-DSCC1-1	6.897830321	4.307782635	14.54327862	6.97E-08	3.55E-06	8.649834361	chr8	-	120879658	120886728	Antisense	Up
lnc-DTHD1-5	-5.680020765	1.225479697	-8.182015113	1.21E-05	0.000254431	3.802835691	chr4	+	33883236	33981558	Antisense	Down
lnc-DUOX2-1	4.631938067	10.72882131	8.153478026	1.24E-05	0.000261022	3.769194082	chr15	-	45365689	45366246	Antisense	Up
lnc-DUPD1-2	5.155733956	1.66917495	7.067866927	4.11E-05	0.000733048	2.572493848	chr10	-	76762812	76784932	Antisense	Up
lnc-DUSP11-3	6.355805	7.154078	4.145576	0.002151733	0.02134938	-1.506223	chr2	-	74065981	74084081	Antisense	Up
lnc-DUSP11-4	7.846381045	4.077817228	15.29427245	4.37E-08	2.48E-06	8.97400538	chr2	-	74093592	74094204	Antisense	Up
lnc-DUSP14-4	6.477493616	5.366895769	6.336747749	9.94E-05	0.00158575	1.651076808	chr17	+	35926803	35936780	Antisense	Up
lnc-DUSP14-5	4.66313527	0.760123709	9.066707318	4.97E-06	0.000120078	4.674006476	chr17	+	35969786	35973886	Antisense	Up
lnc-DUXA-1	6.180815	5.72965	4.341563	0.001589735	0.01660447	-1.201517	chr19	-	57813908	57814300	Intergenic	Up
lnc-DUXA-3	3.659837474	4.726363901	7.591487361	2.27E-05	0.000438677	3.186420915	chr19	-	57778587	57791852	Intergenic	Up
lnc-DYNC1I1-5	9.1059749	3.558403174	34.02235572	2.24E-11	3.31E-08	14.26007338	chr7	+	95746499	95750754	Antisense	Up
lnc-DYSF-12	9.569458747	4.726387803	33.68955395	2.46E-11	3.31E-08	14.15061145	chr2	+	72402068	72405839	Intergenic	Up
lnc-EAF2-3	4.719699	4.593717	3.623576	0.004939549	0.04205555	-2.367046	chr3	+	121468131	121470030	Antisense	Up
lnc-EBNA1BP2-1	3.996493823	0.934396164	10.39496223	1.49E-06	4.32E-05	5.852026326	chr1	-	43637111	43727581	Antisense	Up
lnc-ECHDC2-1	4.562885042	1.337638695	5.508415842	0.000293643	0.004000142	0.569141088	chr1	-	53346887	53347402	Antisense	Up
lnc-ECHDC3-1	4.592148499	1.520980397	10.20260564	1.76E-06	4.96E-05	5.680660799	chr10	+	11715226	11722513	Intergenic	Up
lnc-EDC3-3	3.26441707	1.245779676	4.738312973	0.000875776	0.010128821	-0.563774178	chr15	-	74900174	74901110	Antisense	Up
lnc-EDC3-5	7.051305962	3.671229158	15.73680816	3.35E-08	2.03E-06	9.280055862	chr15	-	74892772	74894587	Intergenic	Up
lnc-EEF1A1-1	7.885234478	2.891730691	31.27830202	5.01E-11	4.03E-08	13.63967572	chr6	-	74201747	74202465	Antisense	Up
lnc-EEF1B2-1	4.604088	5.452991	4.254324	0.001817846	0.01863082	-1.331025	chr2	+	206980270	206987047	Antisense	Up
lnc-EEF1B2-2	6.225001812	2.887184328	16.12320159	2.67E-08	1.72E-06	9.508781708	chr2	+	206949328	206952412	Antisense	Up
lnc-EEF1B2-3	7.892955869	2.943197476	36.01266105	1.30E-11	3.12E-08	14.23763312	chr2	+	206854308	206865582	Antisense	Up
lnc-EFCAB5-2	3.412382507	0.346640952	8.610726139	7.78E-06	0.000174408	4.236255606	chr17	+	28088120	28114854	Intron	Up
lnc-EFEMP1-8	3.978545677	0.905451135	8.280087239	1.09E-05	0.000233084	3.90560014	chr2	-	58389999	58392938	Sense	Up
lnc-EGR4-2	6.216346025	2.210484597	15.72164058	3.38E-08	2.04E-06	9.318887362	chr2	-	73674657	73678809	Antisense	Up
lnc-EHBP1-1	-5.117384903	1.608896721	-10.52666576	1.33E-06	3.95E-05	5.795288845	chr2	+	63277875	63280681	Sense	Down
lnc-EIF1AD-1	3.020892987	10.34165631	9.421448959	3.55E-06	9.04E-05	5.001703747	chr11	-	65768899	65772094	Sense	Up
lnc-EIF2AK4-3	4.696866	5.577718	4.08014	0.002383361	0.02321792	-1.580148	chr15	+	40381032	40381587	Intron	Up
lnc-EIF2B1-3	5.546933128	2.359604476	14.62307934	6.62E-08	3.43E-06	8.67144449	chr12	-	124192148	124192933	Antisense	Up
lnc-EIF2C2-2	-6.519021911	1.43319584	-10.55101605	1.30E-06	3.88E-05	5.969131144	chr8	-	141511787	141521396	Intergenic	Down
lnc-ELSPBP1-1	3.456701	0.6050425	3.869064	0.003327332	0.0306368	-1.921137	chr19	+	48586088	48604226	Antisense	Up
lnc-ENDOU-1	5.840844071	3.133277335	12.74772995	2.35E-07	9.55E-06	7.563838541	chr12	-	48121933	48124381	Intergenic	Up
lnc-ENTPD5-5	2.989160967	6.300618906	5.918442866	0.000169813	0.002508571	1.203293169	chr14	-	74424714	74486102	Sense	Up
lnc-EPAS1-1	2.721281	0.1785532	3.931554	0.003012547	0.02829278	-1.855163	chr2	+	46509837	46574137	Sense	Up
lnc-EPHB6-1	3.858420697	6.753233174	5.044170865	0.000561675	0.006949651	-0.024585796	chr7	+	142573588	142590199	Antisense	Up
lnc-EPN1-6	4.269592563	1.146544154	8.57276141	8.08E-06	0.000180316	4.197485476	chr19	+	56220175	56220486	Intron	Up
lnc-EPOR-2	5.223635477	2.299406734	15.68346875	3.46E-08	2.07E-06	9.289253802	chr19	-	11478798	11485611	Antisense	Up
lnc-ERAL1-3	6.106364	5.663879	4.134542	0.00218906	0.02164271	-1.53241	chr17	+	27224755	27226412	Antisense	Up
lnc-ERAP1-1	4.390939	5.889249	4.27182	0.001769463	0.01819988	-1.308054	chr5	-	96076782	96078402	Antisense	Up
lnc-ERH-1	3.036531455	7.981424777	4.656464951	0.000988573	0.011187348	-0.662411274	chr14	-	69865408	69926228	Antisense	Up
lnc-ERICH1-9	-4.330063506	3.017303224	-5.405922334	0.000337956	0.004514102	0.389747843	chr8	-	563150	595468	Intergenic	Down
lnc-ERP44-1	9.074117357	4.399838656	30.26998282	6.86E-11	5.03E-08	13.25686064	chr9	-	102677358	102692178	Antisense	Up
lnc-ERV3-1-2	-3.656563315	0.751162776	-4.416082716	0.00141889	0.015099079	-1.016260555	chr7	-	64439556	64467121	Sense	Down
lnc-ESCO2-1	6.069035	5.246881	4.172003	0.002065034	0.02069042	-1.461088	chr8	+	27555708	27613943	Antisense	Up
lnc-ESD-1	5.712355927	2.607142853	20.27717096	3.10E-09	3.65E-07	11.1934632	chr13	-	47297465	47379493	Antisense	Up
lnc-ESPN-3	3.981696	3.445945	3.820524	0.003595601	0.03261858	-2.038592	chr1	+	6453614	6454451	Antisense	Up
lnc-ETNK1-3	-4.991292795	1.281514273	-6.013020137	0.00015015	0.002255533	1.244718652	chr12	+	22852792	23327057	Intergenic	Down
lnc-ETNK2-7	7.744872176	2.822795971	23.39260554	8.00E-10	1.60E-07	12.19145168	chr1	-	203769300	203769971	Antisense	Up
lnc-EVI5L-3	3.535505325	1.193991838	5.607740023	0.000256612	0.003567744	0.713627171	chr19	+	7937138	7938035	Antisense	Up
lnc-EVX1-15	2.543699	5.393773	4.310844	0.001666393	0.01730574	-1.218137	chr7	+	27495995	27498410	Intergenic	Up
lnc-EXOC2-21	-5.569273278	1.30481743	-11.49440073	6.02E-07	2.05E-05	6.616551132	chr6	-	994884	1017704	Sense	Down
lnc-EXOC3-3	6.028912	5.55786	4.073565	0.002408051	0.02338219	-1.629437	chr5	+	468366	472762	Antisense	Up
lnc-EXOSC6-2	5.795141146	4.281654712	6.880182041	5.13E-05	0.000887266	2.360321631	chr16	-	70190242	70207351	Sense	Up
lnc-EXOSC8-3	3.178448	1.291031	3.603306	0.005104976	0.04317395	-2.320737	chr13	+	37583647	37583869	Intron	Up
lnc-F13A1-3	-4.047184	1.494641	-3.74525	0.004057376	0.03589666	-2.142376	chr6	-	6692976	6759575	Intergenic	Down
lnc-F8-1	4.134622	7.074712	3.494601	0.006096122	0.0499698	-2.495437	chrX	-	154236711	154255273	Intron	Up
lnc-FAAH2-6	5.362985761	1.855328953	7.225239736	3.43E-05	0.000624364	2.758171493	chrX	+	57016667	57017954	Intron	Up
lnc-FABP3-1	7.6402368	3.596160535	19.16600002	5.27E-09	5.20E-07	10.83758247	chr1	-	31805913	31819646	Antisense	Up
lnc-FABP3-3	5.268055865	1.735250731	14.78328547	5.99E-08	3.17E-06	8.826013686	chr1	-	31849908	31850331	Intergenic	Up
lnc-FAM102B-2	6.277639675	2.153718369	27.87450472	1.51E-10	6.78E-08	13.16243609	chr1	+	109201326	109202665	Antisense	Up
lnc-FAM110B-11	-3.383773	0.7094346	-3.630467	0.00488459	0.0417065	-2.295427	chr8	+	58348578	58353048	Intergenic	Down
lnc-FAM110B-12	-5.149691478	1.91229612	-4.747540172	0.000863948	0.010011405	-0.48938676	chr8	+	58277926	58313593	Intergenic	Down
lnc-FAM117A-1	4.90215	5.06888	3.55427	0.005529494	0.04620359	-2.478643	chr17	-	47794948	47866542	Sense	Up
lnc-FAM120B-3	-3.917874	0.6879328	-3.686747	0.004458952	0.03876878	-2.215535	chr6	+	170483165	170494884	Intergenic	Down
lnc-FAM127C-1	2.110690497	8.901404456	5.853224131	0.000184984	0.002705914	1.041166394	chrX	-	134166290	134167559	Antisense	Up
lnc-FAM135A-2	4.617844675	2.74128799	4.727825369	0.000889429	0.010261193	-0.604976016	chr6	+	71122643	71138047	Sense	Up
lnc-FAM135A-3	4.122134793	1.32243359	7.950211009	1.54E-05	0.000314448	3.57169024	chr6	+	71120632	71122025	Intergenic	Up
lnc-FAM138A-3	-5.768787082	1.27629073	-11.26421474	7.23E-07	2.38E-05	6.426510867	chr1	-	141473	173862	Intergenic	Down
lnc-FAM161B-1	5.085801767	6.593202513	4.98388612	0.000612412	0.007482235	-0.217364207	chr14	-	74362866	74389342	Antisense	Up
lnc-FAM161B-2	6.967592016	4.79012224	12.32711141	3.19E-07	1.22E-05	7.294044661	chr14	-	74389488	74390653	Antisense	Up
lnc-FAM162A-2	7.618180476	4.864703614	9.848597101	2.40E-06	6.44E-05	5.386082593	chr3	+	122134883	122162094	Sense	Up
lnc-FAM164C-2	9.930104238	5.666170265	15.86649545	3.10E-08	1.92E-06	9.376916623	chr14	+	75548827	75549988	Antisense	Up
lnc-FAM177A1-1	5.822653189	1.909447635	8.019093918	1.43E-05	0.000295855	3.634640819	chr14	+	35550286	35582336	Antisense	Up
lnc-FAM178A-1	4.551245835	2.096031215	8.281255455	1.09E-05	0.000233084	3.89949068	chr10	+	102729286	102732642	Sense	Up
lnc-FAM179A-1	-3.457277	0.4881445	-4.010829	0.002657621	0.02548598	-1.729621	chr2	+	29285134	29292005	Antisense	Down
lnc-FAM183A-3	4.776971426	2.415634317	14.39575486	7.66E-08	3.81E-06	8.600344547	chr1	+	43585818	43611958	Intergenic	Up
lnc-FAM190B-4	-4.083783	0.6379799	-3.713917	0.004267519	0.03740765	-2.184394	chr10	+	86322394	86325040	Intergenic	Down
lnc-FAM196A-1	6.601658721	6.00354165	4.722200895	0.000896845	0.010332495	-0.608222574	chr10	-	128798540	128824771	Antisense	Up
lnc-FAM198B-1	7.181235329	3.004493542	19.93835247	3.63E-09	4.03E-07	11.05140665	chr4	-	159120247	159123554	Intergenic	Up
lnc-FAM207A-8	6.179063222	2.633377904	9.578030531	3.07E-06	8.00E-05	5.145312261	chr21	+	46269503	46270003	Antisense	Up
lnc-FAM210A-2	7.636130805	3.530779662	23.49101632	7.69E-10	1.59E-07	12.07397798	chr18	-	13644813	13645684	Antisense	Up
lnc-FAM25A-3	4.619686639	1.759876722	6.779268583	5.78E-05	0.000983095	2.204461626	chr10	+	88801205	88801925	Intergenic	Up
lnc-FAM43A-2	7.397709676	2.698206375	17.59654192	1.18E-08	9.31E-07	10.19863656	chr3	+	194353651	194366130	Antisense	Up
lnc-FAM55B-1	3.782262162	0.57443172	7.699695751	2.02E-05	0.000396982	3.293341247	chr11	+	115045696	115046044	Intron	Up
lnc-FAM57A-2	6.902512399	3.479760025	13.25378232	1.64E-07	7.16E-06	7.906038132	chr17	+	455805	456657	Antisense	Up
lnc-FAM57A-3	4.926964	5.365526	3.900662	0.003164054	0.02943147	-1.910269	chr17	+	644903	648237	Sense	Up
lnc-FAM59B-3	5.531880111	5.449271614	4.73318861	0.000882419	0.010197193	-0.580918822	chr2	+	26435933	26437882	Antisense	Up
lnc-FAM65A-1	-3.005567	1.415503	-4.303572	0.001685106	0.01747404	-1.241492	chr16	+	67515216	67540403	Antisense	Down
lnc-FAM72B-2	3.397852	2.217375	4.165269	0.002086772	0.02085824	-1.486674	chr1	+	120924840	120933000	Antisense	Up
lnc-FAM78A-1	4.474522	1.695688	4.127227	0.002214184	0.02183433	-1.506298	chr9	-	134065296	134069592	Antisense	Up
lnc-FAM78A-3	5.656756669	6.196497029	4.951798924	0.000641398	0.00778464	-0.269988595	chr9	-	134008251	134042892	Antisense	Up
lnc-FAM82A1-10	6.840420187	2.44830476	29.00416541	1.03E-10	5.68E-08	13.4020825	chr2	+	38522792	38523984	Intron	Up
lnc-FAM8A1-2	5.684230035	5.837387287	4.367528699	0.001527852	0.016070501	-1.16132995	chr6	+	17706487	17711388	Antisense	Up
lnc-FAM96B-3	6.598776714	3.194438838	11.91229141	4.36E-07	1.56E-05	7.023425713	chr16	-	66978562	66978999	Antisense	Up
lnc-FAT2-1	8.092533244	3.054287688	34.35848748	2.04E-11	3.31E-08	14.28268793	chr5	-	150870772	150871937	Antisense	Up
lnc-FBN1-3	4.321842291	6.191498176	4.385856771	0.001485713	0.015686446	-1.073362072	chr15	-	48604549	48624053	Antisense	Up
lnc-FBXL22-1	3.893678092	6.666354894	4.761966725	0.000845795	0.009828285	-0.550337358	chr15	+	63967344	64005957	Antisense	Up
lnc-FBXL3-1	5.2306557	1.610033712	7.591146925	2.27E-05	0.000438677	3.179690442	chr13	-	77564116	77601220	Antisense	Up
lnc-FBXO11-1	-4.815689435	1.514477737	-7.891579546	1.64E-05	0.000332527	3.510326101	chr2	-	48168834	48468141	Intergenic	Down
lnc-FBXO2-1	-3.388233851	0.69762308	-6.6076064	7.11E-05	0.001183967	2.063898602	chr1	-	11556213	11559877	Intron	Down
lnc-FBXO34-5	-6.161134428	1.407189615	-9.775443043	2.57E-06	6.83E-05	5.305152592	chr14	+	56141767	56150441	Sense	Down
lnc-FBXO45-3	5.050059164	1.888260574	8.157552135	1.24E-05	0.000260098	3.77959527	chr3	+	196201671	196202265	Antisense	Up
lnc-FBXO47-1	5.930560119	5.299895054	4.624297059	0.001037056	0.011668211	-0.763299869	chr17	-	37075053	37078022	Intergenic	Up
lnc-FBXW8-2	3.954039623	0.511995398	7.697533378	2.02E-05	0.000397734	3.285797375	chr12	+	117890816	117894791	Antisense	Up
lnc-FDFT1-1	6.799714127	2.886835063	15.58308348	3.67E-08	2.17E-06	9.171129912	chr8	+	11701602	11702070	Intron	Up
lnc-FEM1A-4	9.082040361	5.639840909	17.10487233	1.54E-08	1.14E-06	9.965943177	chr19	+	4838343	4838919	Antisense	Up
lnc-FER-1	4.287591	4.518648	3.995807	0.002721334	0.02601347	-1.751899	chr5	+	108061405	108063994	Antisense	Up
lnc-FEZ1-2	4.478533	4.257878	4.231209	0.001883926	0.01917908	-1.364964	chr11	-	125301033	125314212	Antisense	Up
lnc-FGF21-2	3.661037353	7.085566948	5.458279707	0.000314484	0.004239851	0.576763164	chr19	+	49310253	49316812	Antisense	Up
lnc-FGF4-1	-2.629743	0.3408373	-3.565668	0.005427645	0.04548889	-2.362293	chr11	-	69596402	69599143	Intergenic	Down
lnc-FGFBP1-1	7.69698154	3.569745735	20.48539356	2.81E-09	3.50E-07	11.15184352	chr4	-	15852162	15857611	Intergenic	Up
lnc-FGFR1OP2-1	3.998564	3.065486	3.900455	0.003165096	0.02943462	-1.910246	chr12	+	27124518	27132515	Antisense	Up
lnc-FICD-2	4.322288501	0.786482053	7.365125261	2.93E-05	0.000544166	2.923484927	chr12	+	108918435	108919614	Antisense	Up
lnc-FIGNL1-1	4.527225048	4.118542123	9.996843301	2.10E-06	5.79E-05	5.45379523	chr7	-	50518215	50521151	Intergenic	Up
lnc-FKBP2-1	6.383441979	2.210251888	21.55322995	1.74E-09	2.60E-07	11.66203853	chr11	+	64013435	64015689	Antisense	Up
lnc-FKBP8-1	4.704969261	7.584518204	4.608653565	0.001061544	0.011896223	-0.686360893	chr19	-	18668584	18680185	Antisense	Up
lnc-FKRP-1	7.252050337	4.344608336	17.77315375	1.07E-08	8.59E-07	10.18557118	chr19	+	47249302	47280245	Sense	Up
lnc-FLII-1	5.225189879	7.691808176	5.45058265	0.000317821	0.004276581	0.466711199	chr17	-	18075938	18088067	Antisense	Up
lnc-FLNB-3	5.059423468	1.628286643	10.5250447	1.33E-06	3.95E-05	5.917647476	chr3	+	57886575	57887872	Intron	Up
lnc-FMN1-2	-5.352250251	1.677646283	-13.22643775	1.67E-07	7.27E-06	7.907976582	chr15	-	33527752	33539797	Sense	Down
lnc-FMO5-1	4.986382317	4.454547728	5.28624077	0.000398982	0.00519808	0.228841685	chr1	-	146730538	146989699	Sense	Up
lnc-FN1-4	3.726491	5.470099	3.829499	0.00354434	0.03226183	-2.022861	chr2	-	216184530	216416504	Sense	Up
lnc-FOXA3-1	2.599805083	6.045983413	4.883515749	0.000708078	0.008477683	-0.249860523	chr19	+	46333421	46334711	Antisense	Up
lnc-FOXK2-3	5.293539	6.759537	3.740169	0.004090699	0.0361456	-2.17135	chr17	+	80561512	80602538	Sense	Up
lnc-FOXM1-1	6.811970142	3.888568442	10.45231117	1.42E-06	4.15E-05	5.899279087	chr12	-	3048888	3050025	Antisense	Up
lnc-FOXN1-1	8.900890166	3.970903945	37.59779517	8.60E-12	2.91E-08	13.88418465	chr17	+	26900134	26901261	Antisense	Up
lnc-FPR2-1	-4.178341678	0.65224458	-6.668525164	6.61E-05	0.001107993	2.068779278	chr19	+	52197462	52215640	Sense	Down
lnc-FRAT1-2	4.439863	6.615889	3.678758	0.004516932	0.03917515	-2.237324	chr10	+	99084502	99093019	Antisense	Up
lnc-FREM3-2	3.978344454	0.747351616	4.81552763	0.00078188	0.009221371	-0.468540116	chr4	-	144476234	144476736	Intergenic	Up
lnc-FREM3-6	3.689481586	4.517662992	4.563237046	0.001136186	0.012531302	-0.771746928	chr4	-	144256417	144258970	Antisense	Up
lnc-FRMD1-8	6.864003171	6.048246184	5.351671984	0.000364275	0.004813384	0.328853438	chr6	-	168368807	168370046	Antisense	Up
lnc-FSCN1-2	3.236774	6.436448	4.162853	0.002094627	0.02091864	-1.366089	chr7	+	5515434	5519442	Antisense	Up
lnc-FSCN2-3	4.140490161	6.122102704	5.698039658	0.000227285	0.003218863	0.881813009	chr17	+	79525637	79526085	Intron	Up
lnc-FSIP1-1	3.442231605	0.943231141	7.177671471	3.62E-05	0.000655966	2.703730175	chr15	-	39885780	39886432	Antisense	Up
lnc-FTSJ3-1	7.239986575	6.504386777	14.25325309	8.40E-08	4.12E-06	8.125571944	chr17	-	61904474	61907372	Sense	Up
lnc-FUBP3-1	4.677825462	2.373049001	10.75757184	1.09E-06	3.36E-05	6.140994042	chr9	+	133454351	133488409	Sense	Up
lnc-G3BP2-1	4.146160209	0.596094865	7.735206488	1.94E-05	0.000383341	3.326807074	chr4	-	76646862	76649828	Antisense	Up
lnc-GABARAPL2-4	-2.629676	0.3891134	-3.544043	0.005622576	0.04684098	-2.393046	chr16	+	75708249	75712036	Intergenic	Down
lnc-GADD45A-2	9.447016929	4.190588399	28.25172006	1.33E-10	6.60E-08	13.2240175	chr1	+	68944811	68949222	Antisense	Up
lnc-GALNT3-1	2.470036	4.00383	4.071253	0.002416793	0.02344535	-1.520663	chr2	-	166651366	166702601	Intergenic	Up
lnc-GALNTL2-1	-4.216596	0.7393557	-4.087854	0.002354738	0.02297655	-1.606184	chr3	+	16276631	16283253	Intergenic	Down
lnc-GAMT-2	4.05188	7.797979	4.079149	0.002387065	0.02323954	-1.525124	chr19	-	1385157	1389650	Antisense	Up
lnc-GAMT-7	7.122332713	3.478829957	13.69319743	1.22E-07	5.56E-06	8.19549969	chr19	-	1372236	1374363	Antisense	Up
lnc-GANC-1	5.720057	5.008451	4.09567	0.002326104	0.02274491	-1.597972	chr15	+	42500610	42519188	Antisense	Up
lnc-GARS-2	5.026553419	2.822749633	11.54433229	5.79E-07	1.98E-05	6.728452743	chr7	+	30586781	30590397	Antisense	Up
lnc-GAS8-1	-4.726245099	1.796485929	-15.28903238	4.38E-08	2.49E-06	8.439601245	chr16	+	90224339	90289086	Sense	Down
lnc-GATAD2B-1	7.375099661	4.290258728	21.23264022	2.00E-09	2.80E-07	11.3398745	chr1	-	153723458	153724652	Antisense	Up
lnc-GATM-5	2.967513734	0.736868068	5.795264434	0.000199696	0.002888794	1.007776956	chr15	-	45771810	45773663	Intergenic	Up
lnc-GCC1-1	3.374833343	7.260417549	9.857387577	2.38E-06	6.40E-05	5.266833513	chr7	-	127231545	127233665	Antisense	Up
lnc-GCC2-1	5.29117243	1.657759768	18.47001048	7.47E-09	6.70E-07	10.55758845	chr2	+	109128382	109128606	Intergenic	Up
lnc-GCGR-1	3.163373194	8.323753874	6.574177541	7.41E-05	0.001225066	1.967059504	chr17	+	79801040	79801834	Antisense	Up
lnc-GDE1-2	4.7677597	5.459936733	4.824807855	0.000771339	0.009115054	-0.444422587	chr16	-	19422050	19422984	Antisense	Up
lnc-GDI2-1	6.46272647	4.054479706	6.138635716	0.000127743	0.00196989	1.396448736	chr10	-	5754136	5786030	Antisense	Up
lnc-GDPD4-1	3.7865	7.627844	4.181289	0.002035455	0.02047252	-1.349014	chr11	-	76835552	76837201	Intergenic	Up
lnc-GDPD4-2	3.427225816	1.076435506	6.02220735	0.000148375	0.002234989	1.270324597	chr11	-	76666460	76689663	Antisense	Up
lnc-GGCT-1	-7.157523203	3.155584893	-13.14673262	1.77E-07	7.61E-06	7.830576386	chr7	-	30554499	30634425	Sense	Down
lnc-GINS1-4	4.353339788	0.610561665	10.10797055	1.91E-06	5.32E-05	5.599273956	chr20	+	25513662	25514148	Intron	Up
lnc-GIP-5	7.58632509	2.813196777	16.81933059	1.80E-08	1.28E-06	9.815070599	chr17	-	47007751	47010680	Sense	Up
lnc-GIT2-1	4.416135707	3.761675877	7.321900807	3.07E-05	0.000567906	2.876670069	chr12	-	110435223	110437401	Antisense	Up
lnc-GJA10-8	-3.508716	0.4542426	-3.600591	0.005127565	0.04332119	-2.362026	chr6	+	90586262	90586597	Intergenic	Down
lnc-GJA4-1	3.940148	1.597113	4.266281	0.001784633	0.0183514	-1.275413	chr1	+	35316294	35317156	Intron	Up
lnc-GJA4-2	5.775869419	3.611665811	10.75798268	1.09E-06	3.36E-05	6.146831893	chr1	+	35324803	35325900	Antisense	Up
lnc-GK-3	4.513782712	2.401753843	9.334970266	3.85E-06	9.70E-05	4.923931585	chrX	+	31115793	31187673	Antisense	Up
lnc-GLCCI1-1	8.360158366	3.934486572	20.37414721	2.96E-09	3.63E-07	11.10550949	chr7	+	8153654	8156191	Intron	Up
lnc-GLDN-2	5.822808944	1.497847359	7.557626009	2.36E-05	0.00045079	3.138690118	chr15	+	51749482	51752779	Antisense	Up
lnc-GLDN-3	5.947725284	2.389430725	20.29523929	3.07E-09	3.64E-07	11.0758698	chr15	+	51706293	51791030	Antisense	Up
lnc-GLIPR1L1-2	6.07712862	2.701644397	10.93358846	9.45E-07	2.97E-05	6.288227364	chr12	+	75414748	75438573	Antisense	Up
lnc-GLRX2-1	8.106142038	3.717139206	29.32591151	9.29E-11	5.68E-08	13.41384679	chr1	-	193059995	193060686	Intron	Up
lnc-GLUD1-2	5.208521203	1.080674213	9.040972096	5.09E-06	0.000122667	4.648762841	chr10	-	88769541	88775539	Antisense	Up
lnc-GLYATL1-3	2.562895	0.1293839	4.061231	0.002455089	0.0237782	-1.645448	chr11	+	58672342	58672709	Intergenic	Up
lnc-GMDS-1	4.850669114	1.719960435	7.143253768	3.77E-05	0.000678682	2.665785348	chr6	-	2272910	2273285	Intron	Up
lnc-GMDS-6	-5.263077276	2.137543363	-5.682383498	0.0002321	0.003274844	0.879837353	chr6	-	1548085	1624125	Antisense	Down
lnc-GMNC-5	2.337465	5.610964	3.876383	0.003288744	0.03034831	-1.814108	chr3	-	191046019	191047405	Sense	Up
lnc-GMPR2-1	5.75619	7.343491	4.333726	0.001608929	0.01677144	-1.198822	chr14	+	24710239	24711633	Antisense	Up
lnc-GNA11-3	3.330078484	10.28128068	8.513652551	8.58E-06	0.000189776	4.14143467	chr19	+	3052907	3053722	Antisense	Up
lnc-GNG13-5	-5.606525376	1.401640487	-6.256499855	0.000109977	0.001730383	1.575161577	chr16	-	965761	970914	Intron	Down
lnc-GNRHR2-1	2.786328565	8.631853582	6.876910804	5.15E-05	0.000889976	2.332905559	chr1	-	145475981	145508615	Antisense	Up
lnc-GNS-3	10.09212171	3.965659395	45.3019705	1.44E-12	2.91E-08	15.01998663	chr12	-	65089970	65090330	Intergenic	Up
lnc-GOLPH3L-1	2.259171762	0.819882459	4.664010371	0.000977554	0.011079209	-0.659406131	chr1	-	150583858	150587960	Intergenic	Up
lnc-GOSR2-2	4.368526787	7.907941628	18.78126046	6.38E-09	5.96E-07	10.58081314	chr17	+	45055846	45133274	Antisense	Up
lnc-GPBAR1-4	3.390392	1.698146	3.626648	0.00491497	0.04188892	-2.278365	chr2	+	219136102	219182979	Sense	Up
lnc-GPBP1-3	-6.037762492	1.317550859	-13.10843465	1.82E-07	7.77E-06	7.74516277	chr5	+	56946377	56977304	Sense	Down
lnc-GPLD1-1	7.945502044	4.042799604	22.38047224	1.22E-09	2.05E-07	11.8536821	chr6	-	24424792	24436108	Sense	Up
lnc-GPR101-3	-4.730502083	1.031815892	-6.298629291	0.000104291	0.001652732	1.632756715	chrX	-	135998785	136079662	Intergenic	Down
lnc-GPR126-1	5.759352437	4.4327695	5.56003993	0.000273727	0.003770594	0.606807532	chr6	+	143069579	143074896	Antisense	Up
lnc-GPR137C-2	6.360900742	2.764527449	11.7716518	4.85E-07	1.71E-05	6.903966511	chr14	+	52905848	53062710	Sense	Up
lnc-GPR157-6	-4.197187	1.413043	-3.524677	0.005803331	0.04805011	-2.512284	chr1	-	9407715	9411677	Intron	Down
lnc-GPR160-1	8.076223943	3.889034436	13.97137509	1.01E-07	4.79E-06	8.364030441	chr3	+	169805597	169807378	Antisense	Up
lnc-GPR27-5	6.317201801	3.119710525	11.84770413	4.58E-07	1.63E-05	6.977681464	chr3	+	71776211	71778846	Antisense	Up
lnc-GPR37L1-2	4.371749986	1.084245617	4.704626387	0.000920444	0.010546276	-0.599592735	chr1	+	202101762	202102716	Antisense	Up
lnc-GPR68-1	4.54515	3.637303	4.147763	0.002144412	0.0212919	-1.501218	chr14	-	91613022	91615591	Intergenic	Up
lnc-GPR98-8	7.793133629	4.326315544	10.30042514	1.61E-06	4.62E-05	5.770139741	chr5	+	90664552	90666789	Antisense	Up
lnc-GPRC5D-1	5.989543518	2.730484598	29.63307643	8.41E-11	5.68E-08	13.51315231	chr12	-	13128248	13132729	Intron	Up
lnc-GPRC5D-3	7.53941679	3.554473864	11.71704032	5.06E-07	1.77E-05	6.864643132	chr12	-	12982297	12982992	Antisense	Up
lnc-GPS1-1	5.752061771	1.7658083	16.76185885	1.86E-08	1.31E-06	9.305466733	chr17	+	80008566	80009713	Antisense	Up
lnc-GPT2-1	-4.528558	1.554322	-3.804842	0.003687046	0.03326056	-2.062825	chr16	+	47007626	47012894	Intergenic	Down
lnc-GRAMD2-1	3.118174	0.3095052	4.160313	0.00210292	0.02098454	-1.472773	chr15	-	72432844	72447800	Antisense	Up
lnc-GRHL2-14	4.338807	3.066917	4.233639	0.00187686	0.01911645	-1.374303	chr8	+	102184674	102206979	Intergenic	Up
lnc-GRIA3-5	-3.575397396	0.741246823	-4.395295256	0.001464495	0.015509408	-1.044662751	chrX	+	121361030	121382502	Intergenic	Down
lnc-GRID2IP-1	6.438163169	5.892531581	4.390321321	0.001475636	0.015603689	-1.125827152	chr7	-	6618195	6629569	Antisense	Up
lnc-GRM7-2	-4.978697712	1.109837496	-11.34429964	6.78E-07	2.25E-05	6.561135614	chr3	+	6532165	6778421	Antisense	Down
lnc-GSG1L-1	4.76286	5.191588	3.978252	0.002797831	0.02662617	-1.774666	chr16	-	27690260	27730129	Antisense	Up
lnc-GSTM5-1	5.337266	5.765463	4.077685	0.002392549	0.02326949	-1.626638	chr1	+	110268441	110327958	Antisense	Up
lnc-GSTO2-4	3.554868	1.352429	3.553283	0.005538405	0.04626519	-2.443281	chr10	+	106071898	106073639	Intron	Up
lnc-GTF2E2-2	6.046835326	3.889017885	8.77973353	6.57E-06	0.000150399	4.39344703	chr8	-	30428300	30432397	Antisense	Up
lnc-GTF2F2-7	3.669731135	13.39908077	16.80823916	1.81E-08	1.29E-06	9.694497081	chr13	+	45914173	45915318	Intergenic	Up
lnc-GTPBP1-1	7.479505189	2.694185473	28.63539779	1.17E-10	6.16E-08	13.1870717	chr22	+	39130729	39134770	Antisense	Up
lnc-GTPBP1-2	4.020773878	1.377179492	4.529533087	0.00119518	0.01306761	-0.872237704	chr22	+	39135007	39145046	Antisense	Up
lnc-GUCY1A3-3	-3.994378	0.7206651	-3.643866	0.004779552	0.04094339	-2.279021	chr4	+	156363957	156369766	Intergenic	Down
lnc-GUSB-4	2.967004769	8.802815097	10.69597989	1.15E-06	3.51E-05	6.055030447	chr7	-	65617657	65619549	Antisense	Up
lnc-GYG2P1-1	6.011168904	5.740882687	4.634975895	0.001020686	0.011508797	-0.740887358	chrY	-	14774285	14775639	Antisense	Up
lnc-H2AFY2-1	8.39016169	4.188772996	18.92717387	5.94E-09	5.67E-07	10.74057968	chr10	+	71968554	71969331	Antisense	Up
lnc-H3F3B-1	4.923225433	3.238387898	9.932453077	2.23E-06	6.06E-05	5.455044158	chr17	-	73779187	73781974	Sense	Up
lnc-H3F3C-4	4.286188	5.293595	3.77384	0.003875069	0.03454685	-2.047169	chr12	-	32257050	32260462	Antisense	Up
lnc-HAAO-1	4.812453455	1.55269498	18.36849335	7.87E-09	6.96E-07	9.592548505	chr2	-	43028633	43038968	Intergenic	Up
lnc-HABP4-4	6.154399851	6.894997391	11.57237099	5.66E-07	1.94E-05	6.691488134	chr9	+	99262636	99266837	Intron	Up
lnc-HAND1-3	5.799301759	4.113668328	9.973751358	2.15E-06	5.88E-05	5.494950115	chr5	-	153798763	153799256	Intron	Up
lnc-HAUS1-1	6.678607094	7.926109935	4.590860807	0.001090145	0.012144634	-0.812815269	chr18	+	43676292	43678434	Antisense	Up
lnc-HAUS5-3	-2.629799	0.3165028	-3.587017	0.005242098	0.04416393	-2.331933	chr19	+	36066505	36092637	Sense	Down
lnc-HBG2-1	5.692850985	5.17765736	4.515731961	0.001220269	0.013293267	-0.929889076	chr11	-	5717299	5718052	Antisense	Up
lnc-HCN3-1	6.573279442	2.968232734	14.73815253	6.16E-08	3.24E-06	8.767171559	chr1	+	155232235	155233382	Antisense	Up
lnc-HCN4-2	5.23655953	0.942869924	9.204059675	4.36E-06	0.000107536	4.802364221	chr15	-	73595839	73611110	Antisense	Up
lnc-HCRTR1-1	5.41978031	3.412983445	16.66112836	1.97E-08	1.35E-06	9.684766711	chr1	+	32109649	32125539	Antisense	Up
lnc-HDLBP-1	4.326284282	8.115530646	4.781560531	0.000821789	0.009594223	-0.446440451	chr2	-	242290754	242292519	Antisense	Up
lnc-HDLBP-2	8.311231854	5.754821449	13.06909266	1.87E-07	7.91E-06	7.638568863	chr2	-	242276885	242278741	Antisense	Up
lnc-HDLBP-3	6.446538873	3.344231173	23.33166758	8.20E-10	1.60E-07	11.8160959	chr2	-	242132475	242147231	Antisense	Up
lnc-HEATR4-6	5.280388	6.068861	3.847659	0.003442948	0.03149334	-1.991424	chr14	-	74034941	74036537	Antisense	Up
lnc-HELZ-2	5.957476786	4.507788939	6.646296269	6.79E-05	0.001134611	2.049219708	chr17	-	65028524	65029406	Antisense	Up
lnc-HERC6-1	-4.069261	0.5748134	-3.773537	0.003876956	0.0345563	-2.117161	chr4	+	89282460	89291616	Intergenic	Down
lnc-HHIPL1-2	3.030003393	8.803448666	8.907717759	5.80E-06	0.000135385	4.523551576	chr14	+	99978837	99979913	Intron	Up
lnc-HIP1R-1	6.288890564	4.244908161	5.287521004	0.00039827	0.005193656	0.219268747	chr12	+	123349881	123351568	Antisense	Up
lnc-HKR1-3	2.988969006	0.148363094	7.234941803	3.39E-05	0.000618009	2.769873396	chr19	+	37803779	37808044	Intergenic	Up
lnc-HLA-DMA-1	3.584504632	0.742641873	5.630753032	0.00024877	0.003474529	0.793430756	chr6	-	32939841	32940630	Intergenic	Up
lnc-HMBOX1-2	5.156168849	7.191542714	4.543879618	0.00116968	0.012839153	-0.821376855	chr8	+	28924795	28925971	Antisense	Up
lnc-HMBOX1-8	7.919629969	3.674206533	22.78403689	1.03E-09	1.87E-07	12.02507616	chr8	+	28967108	28967444	Antisense	Up
lnc-HMGA1-2	5.903832492	9.568585072	4.855014693	0.000738068	0.008778939	-0.374655775	chr6	+	34231493	34254545	Intergenic	Up
lnc-HMGB2-1	6.214849349	2.810694457	18.28511445	8.21E-09	7.16E-07	10.32291597	chr4	-	174243356	174250845	Antisense	Up
lnc-HMGB2-15	4.750035728	3.243037207	10.66472836	1.18E-06	3.58E-05	6.054812006	chr4	-	174264470	174292092	Intergenic	Up
lnc-HMGB2-3	2.448141	6.122589	3.625321	0.004925574	0.04197075	-2.272204	chr4	-	174053078	174090803	Antisense	Up
lnc-HOXA13-1	4.636096679	7.367604841	5.349604073	0.000365321	0.00482495	0.41866427	chr7	-	27226865	27232305	Antisense	Up
lnc-HOXA13-4	6.231624	5.233193	4.079101	0.002387247	0.02323954	-1.624174	chr7	-	27245386	27247372	Antisense	Up
lnc-HOXB4-1	-4.216434	0.6590313	-4.004013	0.002686334	0.02570828	-1.703843	chr17	-	46656991	46659621	Sense	Down
lnc-HPCAL1-2	6.012006603	2.41509797	18.89329499	6.04E-09	5.75E-07	10.72297688	chr2	+	10702417	10709759	Intergenic	Up
lnc-HPDL-1	-4.77429479	0.985879136	-5.123389326	0.000501737	0.006320221	-0.006731457	chr1	+	45672403	45683543	Intergenic	Down
lnc-HPGD-2	4.787740991	0.889786664	9.28394527	4.04E-06	0.000100891	4.87295827	chr4	-	175252385	175378124	Antisense	Up
lnc-HRASLS-2	-3.918251574	0.801837326	-6.17328779	0.000122218	0.00189447	1.511043521	chr3	+	192232810	192239187	Intergenic	Down
lnc-HSD17B1-2	4.448746339	0.827141685	5.059035946	0.000549869	0.006819708	-0.053389046	chr17	+	40713484	40714287	Sense	Up
lnc-HSP90AA1-1	9.870123897	5.780725198	20.56995062	2.71E-09	3.39E-07	11.22954036	chr14	-	102502651	102532565	Antisense	Up
lnc-HSP90AA1-3	2.643825	5.217297	3.755839	0.003988827	0.03539502	-2.002458	chr14	-	102414634	102419663	Intergenic	Up
lnc-HSPA12B-1	-4.890987787	2.102034145	-5.104691579	0.000515238	0.006460937	-0.01746412	chr20	+	3737140	3741080	Antisense	Down
lnc-HSPB1-3	-4.14339	1.171127	-4.249742	0.001830748	0.01871974	-1.265407	chr7	+	75894724	75899310	Sense	Down
lnc-HSPB6-1	2.479602	5.665441	3.974335	0.002815208	0.02675183	-1.774152	chr19	-	36237957	36244316	Antisense	Up
lnc-HSPB7-1	6.091129953	3.526537414	13.29978902	1.59E-07	6.97E-06	7.946246673	chr1	-	16332654	16333166	Antisense	Up
lnc-HSPG2-1	7.375096356	2.800353249	15.90981571	3.02E-08	1.89E-06	9.414812962	chr1	-	22350486	22357707	Sense	Up
lnc-HTRA2-1	-2.079549	0.1435007	-3.798781	0.003723037	0.03351294	-2.069819	chr2	+	74776197	74782514	Sense	Down
lnc-IARS2-2	6.674048885	3.608014965	10.49422013	1.37E-06	4.03E-05	5.933913947	chr1	+	220206305	220224929	Antisense	Up
lnc-ID2-1	7.042376251	3.330438705	22.92467025	9.69E-10	1.83E-07	11.87195909	chr2	+	8806772	8810423	Intergenic	Up
lnc-ID4-2	6.219241286	2.559498605	25.51804784	3.50E-10	1.06E-07	12.2991739	chr6	+	19538727	19539166	Intergenic	Up
lnc-IFNG-3	5.806015416	1.646831023	7.647601777	2.14E-05	0.000415797	3.228723677	chr12	-	68052770	68064699	Antisense	Up
lnc-IFT46-1	5.342426041	4.746652182	5.274464441	0.000405597	0.00526803	0.198255769	chr11	-	118382625	118401809	Sense	Up
lnc-IGFBP7-1	7.849654443	2.862405738	29.07756153	1.01E-10	5.68E-08	13.27410318	chr4	-	57896938	57931769	Sense	Up
lnc-IGFL3-3	-3.404768	1.080651	-3.98294	0.002777186	0.02648682	-1.770659	chr19	-	46714856	46718095	Antisense	Down
lnc-IGFN1-5	-4.417063655	0.93404333	-8.788810104	6.52E-06	0.000149549	4.400334855	chr1	+	201056016	201062976	Antisense	Down
lnc-IKBIP-1	6.887371168	4.393949982	10.04926067	2.01E-06	5.56E-05	5.560884803	chr12	-	98997628	99000150	Intergenic	Up
lnc-IKZF1-2	6.196291	5.799674	4.172194	0.002064422	0.02069042	-1.47493	chr7	+	51085159	51090687	Intron	Up
lnc-IKZF2-9	5.556659978	2.608676692	20.32160657	3.04E-09	3.63E-07	11.25452116	chr2	-	214149141	214150635	Antisense	Up
lnc-IL10RB-3	5.425767676	3.458530645	13.75125353	1.17E-07	5.39E-06	8.158309095	chr21	+	34696781	34707917	Sense	Up
lnc-IL12RB1-2	4.575397671	2.161271729	7.532117804	2.43E-05	0.000461199	3.080746236	chr19	-	18122107	18142348	Antisense	Up
lnc-IL17B-5	-2.772457	0.6393098	-3.799667	0.003717756	0.03347261	-1.999789	chr5	-	148804755	148812399	Antisense	Down
lnc-IL17RA-13	-4.740575077	1.502027973	-10.0967529	1.93E-06	5.36E-05	5.488515871	chr22	+	17338026	17398742	Intergenic	Down
lnc-IL23A-2	6.611143803	6.196859189	6.603394671	7.15E-05	0.001188726	2.006093532	chr12	+	56693925	56708592	Antisense	Up
lnc-IL2RG-4	7.813825359	2.984141222	23.09045391	9.05E-10	1.73E-07	12.11135338	chrX	-	70320133	70334750	Sense	Up
lnc-IL31RA-1	9.212770486	3.608284567	38.7338906	6.47E-12	2.91E-08	14.78511831	chr5	+	55231970	55237555	Intron	Up
lnc-IL32-1	3.833918568	1.112097562	12.51070398	2.79E-07	1.10E-05	7.358988418	chr16	+	3103256	3105381	Antisense	Up
lnc-IL37-4	-4.729189031	0.965068941	-4.703990625	0.00092131	0.010550417	-0.607304935	chr2	+	113597904	113601772	Intergenic	Down
lnc-IL6-3	2.729264	5.725288	3.979254	0.002793408	0.02660512	-1.746616	chr7	+	22551433	22690102	Sense	Up
lnc-IL6-8	7.169110886	8.509639764	4.644263853	0.001006672	0.011366102	-0.730998102	chr7	+	22862111	22867914	Antisense	Up
lnc-ILK-1	3.75960636	1.504032805	6.710636828	6.28E-05	0.001059832	2.131044005	chr11	+	6640020	6640995	Antisense	Up
lnc-ILK-6	3.288695664	0.992250468	4.592423488	0.001087601	0.012125977	-0.769458986	chr11	+	6696078	6700104	Intergenic	Up
lnc-ILKAP-4	5.413159744	1.975187912	13.75547591	1.17E-07	5.39E-06	8.225766356	chr2	-	238998758	239000269	Antisense	Up
lnc-IMPDH2-2	4.036579	7.050468	3.926229	0.00303811	0.02850724	-1.766213	chr3	-	49055628	49059724	Sense	Up
lnc-ING1-3	8.679737108	4.081720209	29.09455011	1.00E-10	5.68E-08	13.32927957	chr13	+	111545044	111546727	Antisense	Up
lnc-INPPL1-1	6.729513559	3.790824208	11.40474075	6.46E-07	2.16E-05	6.651699945	chr11	+	72013182	72014009	Antisense	Up
lnc-INTS12-1	5.855793977	2.629973699	17.97518967	9.65E-09	7.94E-07	10.36117495	chr4	-	106848216	106853879	Antisense	Up
lnc-INTS12-2	6.233317749	2.941553702	20.14011913	3.30E-09	3.79E-07	11.16165601	chr4	-	106600206	106601251	Intergenic	Up
lnc-INTS4-1	3.467585	1.148672	3.708428	0.004305483	0.03765362	-2.185796	chr11	-	77577457	77581137	Antisense	Up
lnc-IQCF6-2	3.608843	7.227487	3.869429	0.003325399	0.03062574	-1.874283	chr3	-	51700249	51704909	Intergenic	Up
lnc-IQCG-2	7.240251518	3.351168782	23.48057652	7.72E-10	1.59E-07	12.19518263	chr3	-	197557555	197558167	Antisense	Up
lnc-IQCG-6	5.645078275	2.366393161	24.54349224	5.07E-10	1.28E-07	12.34937734	chr3	-	197614093	197615086	Intergenic	Up
lnc-IRAK4-2	6.196738425	2.709905129	17.12593937	1.52E-08	1.13E-06	9.923826724	chr12	+	44130430	44134870	Antisense	Up
lnc-IRF1-4	5.437950959	2.209908263	20.1203847	3.33E-09	3.80E-07	11.10736727	chr5	-	131729544	131733095	Antisense	Up
lnc-IRF2BP2-4	-4.038683	0.5812253	-3.62195	0.004952605	0.04214955	-2.367328	chr1	-	234756939	234792964	Antisense	Down
lnc-IRF4-6	6.730812566	4.56812241	11.96018615	4.20E-07	1.52E-05	7.053584848	chr6	+	451134	488420	Antisense	Up
lnc-IRGM-1	5.502894749	1.412496708	15.9869436	2.89E-08	1.83E-06	9.420661664	chr5	+	150310018	150310878	Antisense	Up
lnc-IRS2-8	-5.528022684	1.1122463	-8.935683257	5.64E-06	0.00013241	4.549527803	chr13	-	109882818	109960133	Intergenic	Down
lnc-ITGAD-1	3.935827	2.996699	3.774078	0.003873585	0.03454685	-2.115316	chr16	+	31439343	31450269	Antisense	Up
lnc-ITGB3BP-5	3.786537518	6.319531123	4.812077793	0.000785837	0.009257601	-0.397022589	chr1	-	63906440	64059392	Sense	Up
lnc-ITIH3-4	5.284994755	0.92564435	12.27117154	3.32E-07	1.26E-05	7.227365923	chr3	+	52931792	52935791	Intergenic	Up
lnc-ITPR2-2	6.132918712	2.004578848	5.719984936	0.000220717	0.003149308	0.85434554	chr12	-	26383751	26472653	Antisense	Up
lnc-JAG1-1	7.371004422	3.709236119	16.70228252	1.92E-08	1.34E-06	9.780610635	chr20	-	10733925	10745934	Antisense	Up
lnc-JAG1-6	5.090247	4.591276	3.651436	0.00472125	0.04055194	-2.321054	chr20	-	11890051	11899325	Antisense	Up
lnc-JMJD7-PLA2G4B-2	5.676534144	6.582340782	4.677604353	0.00095803	0.010893362	-0.679609011	chr15	+	42184973	42192352	Antisense	Up
lnc-JUNB-2	6.000633627	8.236103789	6.22777253	0.000114046	0.001782625	1.54050824	chr19	+	12907636	12912663	Antisense	Up
lnc-KANK3-3	8.094818694	4.057744351	14.20268404	8.68E-08	4.22E-06	8.434720181	chr19	-	8166026	8537075	Sense	Up
lnc-KAT8-2	4.544458465	1.404158266	10.41260632	1.46E-06	4.28E-05	5.864811428	chr16	+	31144693	31145331	Intron	Up
lnc-KATNAL2-5	8.728074562	3.986958897	23.250503	8.48E-10	1.65E-07	12.17088445	chr18	+	44632316	44634433	Antisense	Up
lnc-KAZALD1-1	5.317242	5.072778	3.842734	0.003470141	0.0316728	-2.003772	chr10	+	102826055	102827888	Intergenic	Up
lnc-KB-1980E6.3.1-6	7.757378045	3.07392831	36.8764725	1.04E-11	2.91E-08	14.09144918	chr8	+	103268619	103270049	Antisense	Up
lnc-KBTBD3-1	6.868228429	2.348744344	16.68744867	1.94E-08	1.35E-06	9.781012466	chr11	-	105956716	105972702	Antisense	Up
lnc-KCNC1-2	-5.48447241	1.169264595	-7.347523171	2.99E-05	0.000553131	2.886583558	chr11	+	17816330	17818197	Intron	Down
lnc-KCNH5-3	5.361779161	2.418206731	18.85445853	6.16E-09	5.82E-07	10.69513293	chr14	-	62570095	62583893	Intergenic	Up
lnc-KCNJ12-4	5.424517072	1.338649246	12.6037646	2.60E-07	1.04E-05	7.446783151	chr17	+	21436234	21446049	Intron	Up
lnc-KCNJ12-5	-3.971116081	2.360604485	-5.17533789	0.000466176	0.005934839	0.101901635	chr17	+	21516181	21548969	Intergenic	Down
lnc-KCNJ13-1	4.959152	4.756013	3.752583	0.004009772	0.03554317	-2.108644	chr2	-	233624855	233632659	Sense	Up
lnc-KCNMB4-1	-3.298893	1.551963	-4.079691	0.002385038	0.02322885	-1.612049	chr12	+	70861864	70951802	Antisense	Down
lnc-KCNS3-11	3.912925869	0.472890945	8.815654922	6.35E-06	0.000146288	4.435200166	chr2	+	19538691	19552092	Sense	Up
lnc-KCNT1-2	6.815704972	4.088261697	12.16135023	3.61E-07	1.35E-05	7.167941965	chr9	+	138900081	138901544	Intron	Up
lnc-KCNT1-7	6.34918538	3.954112456	17.85743806	1.03E-08	8.27E-07	10.10153315	chr9	+	138847104	138847404	Antisense	Up
lnc-KCTD18-1	4.298371651	6.816892108	5.892130901	0.000175766	0.002581005	1.067032685	chr2	-	201314169	201343184	Antisense	Up
lnc-KCTD2-2	4.366256385	9.586854467	11.69358729	5.15E-07	1.80E-05	6.795293884	chr17	+	73028669	73045418	Sense	Up
lnc-KCTD4-1	6.747216215	3.33326344	22.50292972	1.16E-09	2.01E-07	11.94126763	chr13	-	45693999	45695288	Antisense	Up
lnc-KDM3A-1	6.681078118	4.73510527	7.764341247	1.88E-05	0.000373326	3.343735086	chr2	+	86789192	86845889	Antisense	Up
lnc-KDM4C-18	6.863796043	1.808351945	10.534156	1.32E-06	3.93E-05	5.926922212	chr9	+	9442059	9442347	Intergenic	Up
lnc-KDM5B-3	-4.357679	0.6828129	-3.7645	0.003933661	0.03497973	-2.132296	chr1	-	202590416	202594367	Intron	Down
lnc-KHDRBS3-4	-2.211845	0.394444	-4.041707	0.002531545	0.02442819	-1.674219	chr8	+	135837775	135855171	Sense	Down
lnc-KHDRBS3-6	-3.868358963	1.002571079	-5.634836702	0.000247406	0.003460454	0.781441069	chr8	+	135732687	135736192	Intergenic	Down
lnc-KHDRBS3-9	-5.934377549	1.257867242	-10.24218587	1.70E-06	4.82E-05	5.66965929	chr8	+	137543021	137997178	Intergenic	Down
lnc-KIAA0020-2	4.044332445	0.727431627	9.151630196	4.58E-06	0.000112117	4.752003229	chr9	-	2041899	2046023	Intron	Up
lnc-KIAA0020-7	7.709070245	3.415302501	16.65829743	1.97E-08	1.35E-06	9.736734059	chr9	-	2192966	2193572	Antisense	Up
lnc-KIAA0087-2	4.919890352	0.89715142	7.960974797	1.52E-05	0.000311164	3.569373146	chr7	-	26411763	26416321	Antisense	Up
lnc-KIAA0125-2	-5.52836895	1.378942351	-6.366503997	9.58E-05	0.001537797	1.714216885	chr14	+	106322129	106967348	Sense	Down
lnc-KIAA0196-5	7.110417125	3.673741253	19.90080697	3.70E-09	4.07E-07	11.07608513	chr8	-	126016111	126021316	Antisense	Up
lnc-KIAA0226-2	-3.172201	3.146735	-3.535458	0.005701971	0.04741741	-2.504355	chr3	-	197360531	197381275	Intergenic	Down
lnc-KIAA0319-1	7.039872248	6.050894098	22.22713331	1.30E-09	2.13E-07	11.32760328	chr6	-	24534019	24539510	Antisense	Up
lnc-KIAA0564-2	7.481033577	4.733643742	11.9563942	4.21E-07	1.52E-05	7.050897223	chr13	-	42876242	42884992	Antisense	Up
lnc-KIAA0664-2	9.443892347	5.226294812	21.94094926	1.47E-09	2.28E-07	11.75568973	chr17	-	2586598	2588382	Antisense	Up
lnc-KIAA0913-1	4.685786	5.999931	3.548037	0.005586033	0.04662943	-2.486599	chr10	+	75573275	75574495	Intron	Up
lnc-KIAA1147-1	6.861891524	3.565582553	11.40441356	6.46E-07	2.16E-05	6.647718456	chr7	-	141352180	141356610	Sense	Up
lnc-KIAA1429-6	7.752281385	2.919555748	33.2981961	2.76E-11	3.31E-08	14.0656092	chr8	-	95718688	95720871	Antisense	Up
lnc-KIAA1609-1	4.315029	2.86487	3.602015	0.005115708	0.04322975	-2.402794	chr16	-	84493881	84495339	Antisense	Up
lnc-KIAA1644-1	-4.24398	1.125439	-3.506181	0.005981617	0.04924354	-2.502103	chr22	-	44578910	44583619	Antisense	Down
lnc-KIAA1731-1	7.405897898	3.4094055	29.26745295	9.46E-11	5.68E-08	13.4324455	chr11	+	93466522	93469469	Antisense	Up
lnc-KIAA1919-8	4.153552305	0.574443499	10.30488922	1.61E-06	4.62E-05	5.758529872	chr6	+	111697417	111697741	Intron	Up
lnc-KIDINS220-11	-4.267602	0.7637486	-3.788509	0.00378488	0.03389453	-2.09578	chr2	-	8998976	9002606	Sense	Down
lnc-KIF13B-2	6.366408	7.770522	4.310506	0.001667258	0.01731042	-1.250008	chr8	-	28779447	28922453	Antisense	Up
lnc-KIF26A-1	-3.068754548	0.377916558	-4.677656806	0.000957956	0.010893362	-0.675613817	chr14	+	104672214	104676114	Intergenic	Down
lnc-KIF26B-4	-3.337283282	0.728533201	-5.607933275	0.000256545	0.003567744	0.695327239	chr1	+	246057869	246059667	Intron	Down
lnc-KLHDC10-2	6.307951086	1.297611397	12.38967753	3.04E-07	1.17E-05	7.307294669	chr7	+	129593073	129666391	Antisense	Up
lnc-KLHL20-1	4.669260954	0.710395936	11.6575162	5.30E-07	1.84E-05	6.797835844	chr1	+	173596206	173606330	Sense	Up
lnc-KLHL22-2	3.094105737	5.100232028	6.756920978	5.94E-05	0.001006509	2.244132896	chr22	-	20941782	20946505	Antisense	Up
lnc-KLHL25-12	4.666915649	2.859449483	6.090054781	0.000135948	0.002074997	1.322126609	chr15	-	86203987	86206591	Intron	Up
lnc-KLHL25-6	9.359004719	5.369150593	23.58399248	7.40E-10	1.56E-07	12.14365709	chr15	-	86122095	86123409	Antisense	Up
lnc-KLHL31-8	5.573668	5.079363	3.786464	0.003797323	0.03398413	-2.099129	chr6	-	53783771	53785586	Antisense	Up
lnc-KLHL36-2	3.149393412	9.858391922	4.56945797	0.00112564	0.012453808	-0.838365994	chr16	+	84599207	84612543	Antisense	Up
lnc-KMO-1	-5.520705675	1.180132968	-7.416234254	2.76E-05	0.000516947	2.967736999	chr1	+	241577056	241597028	Intergenic	Down
lnc-KNTC1-3	-4.708954889	0.964254758	-7.376022158	2.89E-05	0.000537995	2.952074756	chr12	+	123140234	123165633	Intergenic	Down
lnc-KRBA1-2	4.379528192	2.180791084	6.486236575	8.26E-05	0.00134929	1.833491511	chr7	+	149470296	149473130	Intergenic	Up
lnc-KRT80-10	6.84410175	2.812450292	20.96851855	2.26E-09	3.00E-07	11.45945799	chr12	-	52389346	52390807	Antisense	Up
lnc-KRT80-9	5.570353954	4.807208896	6.626794354	6.95E-05	0.001159954	2.015523161	chr12	-	52400033	52401439	Antisense	Up
lnc-L3MBTL2-1	4.630073857	2.340647971	6.422568847	8.93E-05	0.001445769	1.766811458	chr22	+	41589719	41593663	Antisense	Up
lnc-LAD1-1	-3.968298676	0.749618534	-4.598781616	0.001077313	0.012027306	-0.798979918	chr1	-	201336270	201344496	Sense	Down
lnc-LALBA-1	4.447166179	1.203454687	9.451167277	3.45E-06	8.82E-05	5.018080679	chr12	-	48877069	48894744	Antisense	Up
lnc-LAMA5-2	4.350315439	6.701338145	5.435694736	0.000324386	0.004352314	0.52252846	chr20	-	60883010	60884313	Sense	Up
lnc-LAMA5-3	4.737109	5.079885	3.6684	0.004593285	0.03973026	-2.286234	chr20	-	60875854	60878715	Antisense	Up
lnc-LAMA5-4	3.57902836	7.31563673	6.141281473	0.000127312	0.001963965	1.463047522	chr20	-	60868585	60869995	Antisense	Up
lnc-LAT2-2	7.960869595	2.87678783	36.84881346	1.04E-11	2.91E-08	14.23894664	chr7	+	73645995	73646353	Intron	Up
lnc-LECT1-1	5.057007189	7.223182479	6.593485912	7.24E-05	0.001199838	2.037058676	chr13	-	53263721	53274883	Intergenic	Up
lnc-LEKR1-1	-4.121799088	1.518234434	-5.479825485	0.000305339	0.004136335	0.534061067	chr3	+	156799629	156806336	Intron	Down
lnc-LENG9-4	4.846262	4.915183	3.661015	0.004648539	0.04011691	-2.301721	chr19	-	54960789	54963440	Antisense	Up
lnc-LEO1-2	8.040976239	3.798755401	16.76119164	1.86E-08	1.31E-06	9.686705436	chr15	-	52201098	52201839	Antisense	Up
lnc-LEO1-4	7.380215952	2.612916762	30.15183974	7.12E-11	5.12E-08	13.30713158	chr15	-	52179756	52193320	Antisense	Up
lnc-LEP-1	5.819583087	3.544230145	21.12572616	2.10E-09	2.85E-07	10.62354421	chr7	+	127946701	127947731	Antisense	Up
lnc-LEPRE1-1	7.838151422	3.333203114	28.75981967	1.12E-10	6.00E-08	13.30090705	chr1	-	43241468	43250520	Intergenic	Up
lnc-LEPROTL1-9	-4.46716279	0.876278608	-9.864186861	2.37E-06	6.37E-05	5.347438204	chr8	+	29661759	29711926	Antisense	Down
lnc-LETM2-2	6.348561469	3.536514702	8.936658721	5.64E-06	0.00013241	4.549868889	chr8	+	38193498	38195069	Antisense	Up
lnc-LETM2-5	6.868448661	3.217512859	22.79510434	1.02E-09	1.87E-07	12.01504051	chr8	+	38188441	38189023	Antisense	Up
lnc-LGSN-6	2.89611607	0.4558191	6.792298637	5.69E-05	0.00097149	2.256251921	chr6	-	66005649	66012904	Sense	Up
lnc-LIPG-2	8.598773525	4.357227196	20.45067469	2.86E-09	3.54E-07	11.23538315	chr18	+	47013708	47018248	Sense	Up
lnc-LIPJ-2	3.204291	0.9741744	4.047105	0.002510157	0.02425537	-1.593421	chr10	+	90343083	90344727	Intergenic	Up
lnc-LMAN2-1	6.468990601	3.937596599	22.28295187	1.27E-09	2.09E-07	11.59979528	chr5	-	176797495	176807551	Antisense	Up
lnc-LMOD1-4	3.47922	8.040672	3.958526	0.002886498	0.02729935	-1.648865	chr1	-	201964823	201965480	Antisense	Up
lnc-LMTK3-1	4.922728208	1.10342541	9.71596368	2.71E-06	7.16E-05	5.263101861	chr19	-	48978356	48985570	Antisense	Up
lnc-LOH12CR1-1	8.872473536	6.502724655	13.47778011	1.41E-07	6.28E-06	8.048003191	chr12	+	12626617	12628831	Intron	Up
lnc-LOH12CR1-5	3.658156783	0.405043362	6.469072287	8.43E-05	0.001372475	1.845285662	chr12	+	12491709	12492188	Intron	Up
lnc-LOXL1-1	7.168441162	3.213339092	22.30857956	1.26E-09	2.08E-07	11.84898868	chr15	+	74209525	74211786	Antisense	Up
lnc-LPIN2-1	6.559377936	2.644806528	28.3289211	1.29E-10	6.59E-08	12.82809584	chr18	-	2688561	2833063	Antisense	Up
lnc-LPP-7	-4.3019	0.6712211	-3.665739	0.004613113	0.03988526	-2.294958	chr3	+	188902847	188932896	Sense	Down
lnc-LRIT2-4	6.380483223	8.626517004	4.463523355	0.00132036	0.014202364	-1.01206563	chr10	-	85898175	85900338	Antisense	Up
lnc-LRR1-1	7.700069738	4.9867722	7.106946245	3.93E-05	0.00070354	2.619010721	chr14	+	50053297	50053594	Intergenic	Up
lnc-LRRC1-5	8.687351335	3.791615807	24.77190789	4.64E-10	1.23E-07	12.51647405	chr6	+	53367982	53371717	Antisense	Up
lnc-LRRC38-2	8.591818801	3.909872547	37.72634013	8.33E-12	2.91E-08	14.53769879	chr1	-	14104759	14105625	Antisense	Up
lnc-LRRC3C-2	2.696972109	6.021258977	4.892592389	0.000698803	0.008383432	-0.328043613	chr17	+	38078107	38078537	Intron	Up
lnc-LRRC57-1	9.039403681	5.20730977	22.10957482	1.37E-09	2.20E-07	11.7267751	chr15	-	42824064	42825038	Antisense	Up
lnc-LRRC57-2	3.459778623	0.569525806	4.444140685	0.001359709	0.014555879	-1.008769065	chr15	-	42859228	42862192	Antisense	Up
lnc-LRRC61-5	3.90653652	5.837759901	6.050428689	0.000143063	0.002170125	1.404032466	chr7	+	149922267	149934873	Intergenic	Up
lnc-LRRFIP2-1	8.798272796	5.303828176	14.02993217	9.72E-08	4.63E-06	8.389958366	chr3	-	37400867	37408234	Antisense	Up
lnc-LRRFIP2-3	2.355276686	6.016277057	4.905954262	0.000685384	0.008253226	-0.249595928	chr3	-	37283279	37285686	Antisense	Up
lnc-LRRN4-2	9.353759587	3.83938721	33.06584446	2.95E-11	3.31E-08	13.62118106	chr20	-	6018019	6019573	Antisense	Up
lnc-LRSAM1-1	8.81878415	5.796590953	19.72915865	4.01E-09	4.28E-07	10.86086366	chr9	+	130287600	130289885	Antisense	Up
lnc-LSG1-4	7.087161879	2.398760313	14.43464814	7.47E-08	3.74E-06	8.606307958	chr3	-	194308601	194310910	Intron	Up
lnc-LSM5-2	8.462219043	4.029733725	15.43563103	4.01E-08	2.33E-06	9.174680933	chr7	-	32624855	32630543	Sense	Up
lnc-LSS-1	5.492501575	2.777345788	15.5911883	3.65E-08	2.16E-06	9.254208631	chr21	-	47671462	47674047	Sense	Up
lnc-LTBR-6	5.005440072	1.582426934	15.32634959	4.28E-08	2.46E-06	9.116478671	chr12	+	6472666	6479967	Antisense	Up
lnc-LUZP1-3	8.055135421	6.002219108	9.633817769	2.92E-06	7.64E-05	5.195106464	chr1	-	23404834	23406532	Intergenic	Up
lnc-LXN-1	7.078778446	2.573216006	22.02991488	1.41E-09	2.24E-07	11.8123634	chr3	-	158261843	158288858	Sense	Up
lnc-LY86-4	-6.393167025	1.431188573	-8.861413933	6.07E-06	0.000140401	4.478058976	chr6	+	6680541	6749643	Intergenic	Down
lnc-LYRM2-1	3.621433936	1.016141253	5.702930177	0.000225804	0.003202364	0.845108859	chr6	-	90270593	90276763	Antisense	Up
lnc-LYRM2-2	5.456216362	2.382269294	8.658931316	7.41E-06	0.000167093	4.27471145	chr6	-	90277862	90348216	Sense	Up
lnc-LYZL1-10	4.589146967	1.49472574	5.684354276	0.000231488	0.003268414	0.813654951	chr10	+	29783276	29784637	Antisense	Up
lnc-M6PR-5	2.381732916	0.936706325	4.585757761	0.001098499	0.012221417	-0.768041691	chr12	-	9010525	9067862	Antisense	Up
lnc-MACC1-1	4.107770324	5.731451603	8.297281705	1.07E-05	0.000229804	3.906321843	chr7	-	19938141	20180103	Sense	Up
lnc-MAFF-2	5.298416117	3.799895878	6.227502609	0.000114085	0.001782625	1.506797721	chr22	+	38615652	38616226	Intron	Up
lnc-MAFF-6	5.582245676	5.845851057	4.374666001	0.001511294	0.015923155	-1.155496843	chr22	+	38687343	38687698	Intron	Up
lnc-MAFF-9	3.056803	0.2657305	3.960127	0.002879196	0.02725461	-1.785735	chr22	+	38731305	38732711	Antisense	Up
lnc-MAN2A2-2	5.851865021	6.463379967	4.859357111	0.000733413	0.008726046	-0.404283423	chr15	+	91473447	91474809	Sense	Up
lnc-MANSC4-2	9.297945508	4.468368987	19.79030495	3.90E-09	4.20E-07	11.06069385	chr12	-	27951459	27953660	Antisense	Up
lnc-MAP1LC3B-1	-4.387916722	1.255132628	-9.675519527	2.81E-06	7.39E-05	5.183747278	chr16	+	87351027	87352408	Intergenic	Down
lnc-MAP1LC3B-9	4.730230889	2.801521866	11.83874493	4.61E-07	1.63E-05	6.963206139	chr16	+	87360592	87361190	Antisense	Up
lnc-MAP4K3-2	5.847414212	1.530355419	16.98014256	1.65E-08	1.20E-06	9.903097129	chr2	-	39722100	39785187	Antisense	Up
lnc-MAP6-1	5.619122295	2.383599718	20.2911255	3.08E-09	3.64E-07	11.13633774	chr11	-	75283073	75283832	Antisense	Up
lnc-MAPK6-5	5.294966681	4.019445878	12.64511546	2.53E-07	1.02E-05	7.51041317	chr15	+	52408770	52414328	Antisense	Up
lnc-MAPK6-8	4.668635566	6.342536121	9.398627132	3.63E-06	9.19E-05	4.965371906	chr15	+	52596648	52603672	Antisense	Up
lnc-MAPK6-9	7.971028879	1.81281069	19.16323947	5.28E-09	5.20E-07	10.64680292	chr15	+	52870038	52890906	Antisense	Up
lnc-MARCH10-1	5.864246358	3.853160892	15.67417982	3.48E-08	2.08E-06	9.157145689	chr17	-	61006841	61044171	Intron	Up
lnc-MARCH10-4	-5.141946673	1.512930592	-5.814455131	0.00019469	0.002824186	1.038414003	chr17	-	60703861	60704878	Antisense	Down
lnc-MARCH4-1	5.267250929	2.627762594	16.65729748	1.97E-08	1.35E-06	9.749959555	chr2	-	217250010	217277419	Antisense	Up
lnc-MARCKS-5	-4.725728689	1.64775506	-12.39880579	3.02E-07	1.17E-05	7.350309341	chr6	+	114290864	114792869	Sense	Down
lnc-MATN2-1	6.458192403	8.781689133	12.91302148	2.09E-07	8.64E-06	7.644390083	chr8	+	99053953	99056349	Antisense	Up
lnc-MBD3L1-2	4.290001386	1.783479853	7.609249672	2.23E-05	0.000431709	3.189825276	chr19	+	8932176	8934786	Antisense	Up
lnc-MBOAT1-13	6.690904433	6.25510461	6.901791687	5.00E-05	0.000869173	2.358438621	chr6	-	19816346	19857974	Antisense	Up
lnc-MBTPS2-1	-5.054901601	1.518837946	-10.40306213	1.48E-06	4.30E-05	5.724449105	chrX	+	21911717	21929813	Intergenic	Down
lnc-MBTPS2-2	-4.657501684	1.043325074	-9.406684761	3.60E-06	9.14E-05	4.964155344	chrX	+	21821638	21829947	Intergenic	Down
lnc-MCTS1-2	6.395094265	3.680291758	6.502877621	8.09E-05	0.001325008	1.858256579	chrX	+	119693965	119728099	Antisense	Up
lnc-MDH2-2	2.670827757	5.955277479	5.417705437	0.000332514	0.004447094	0.543411359	chr7	+	75728757	75731945	Intergenic	Up
lnc-MDM4-8	7.101017763	3.091595746	32.39207265	3.59E-11	3.36E-08	13.70900396	chr1	+	204372517	204373870	Antisense	Up
lnc-MDS2-1	-3.08064	0.7261836	-4.249578	0.001831211	0.01871989	-1.263047	chr1	+	23907984	23967058	Sense	Down
lnc-MED10-11	-4.709759	2.775801	-3.554668	0.005525909	0.04618286	-2.479486	chr5	-	4452042	4868236	Antisense	Down
lnc-MEP1B-2	2.215970302	6.418066838	5.636459271	0.000246866	0.003455214	0.723742779	chr18	+	29992144	29993199	Intron	Up
lnc-MEPCE-2	5.686890401	4.257124399	15.46195273	3.95E-08	2.30E-06	9.174006802	chr7	+	100033826	100036127	Antisense	Up
lnc-MESDC1-2	-4.330185	0.6996937	-3.516028	0.005885999	0.04860947	-2.543384	chr15	+	81353293	81355829	Intergenic	Down
lnc-MEST-2	7.534401777	4.092240582	16.4976933	2.16E-08	1.45E-06	9.702626986	chr7	+	130147500	130148123	Antisense	Up
lnc-METRNL-1	-4.117107	1.010187	-3.903154	0.003151541	0.02933465	-1.842458	chr17	+	81061204	81063860	Intergenic	Down
lnc-MFN1-1	7.514176528	1.846971561	19.43532135	4.62E-09	4.70E-07	10.68617114	chr3	+	179114748	179116979	Intron	Up
lnc-MFSD2A-1	5.408898236	2.74040523	13.87831689	1.07E-07	5.05E-06	8.286563895	chr1	+	40363416	40364770	Intron	Up
lnc-MFSD4-1	5.492782224	8.260674993	21.41517077	1.85E-09	2.67E-07	11.49943185	chr1	+	205685227	205719310	Antisense	Up
lnc-MFSD8-1	4.288814616	1.040078937	6.765550168	5.88E-05	0.000997359	2.225456734	chr4	-	128761352	128765195	Intergenic	Up
lnc-MFSD9-4	8.86107524	3.441911447	33.87906323	2.33E-11	3.31E-08	14.2300724	chr2	-	102789080	102798568	Antisense	Up
lnc-MGLL-5	3.920316846	6.7463326	7.503309677	2.51E-05	0.000474062	3.082410428	chr3	-	127789161	127790503	Antisense	Up
lnc-MINA-9	4.705144342	1.445323871	5.896275398	0.000174813	0.002568824	1.101168664	chr3	-	96068280	96069116	Intergenic	Up
lnc-MIXL1-2	7.920275732	3.481395792	24.69767495	4.78E-10	1.26E-07	12.55188834	chr1	+	226335703	226342772	Antisense	Up
lnc-MKI67IP-8	6.037004904	1.232376781	9.010176315	5.25E-06	0.000125502	4.621001913	chr2	-	122524505	122524867	Antisense	Up
lnc-MKLN1-1	6.552989716	3.859473615	14.66010477	6.47E-08	3.37E-06	8.708133124	chr7	+	130565957	130794396	Sense	Up
lnc-MLH3-2	2.89849	1.978483	4.069015	0.00242529	0.02351137	-1.614082	chr14	-	75477971	75479554	Intergenic	Up
lnc-MLLT10-5	-2.979313	0.6147319	-4.217793	0.00192344	0.01951958	-1.310309	chr10	+	21503195	21504644	Intergenic	Down
lnc-MLNR-1	2.275069248	0.123728482	5.329016046	0.000375911	0.004943705	0.338338594	chr13	+	49809033	49809398	Intergenic	Up
lnc-MLST8-1	6.144104825	2.557937911	15.03969788	5.10E-08	2.81E-06	8.937784404	chr16	+	2261997	2262864	Antisense	Up
lnc-MLX-3	6.631708846	6.195742561	5.743507643	0.000213904	0.003067787	0.860911884	chr17	+	40731534	40732698	Antisense	Up
lnc-MMP15-1	8.248687746	3.1242108	34.12011886	2.18E-11	3.31E-08	14.25895614	chr16	+	58150788	58153257	Antisense	Up
lnc-MMP23B-1	2.790481311	4.803750631	5.434388545	0.000324969	0.004358736	0.53644189	chr1	+	1655950	1667414	Antisense	Up
lnc-MMP23B-3	8.210576769	3.772354451	30.5564799	6.27E-11	4.75E-08	13.61135928	chr1	+	1590785	1594063	Intron	Up
lnc-MNT-1	2.599040501	8.230512221	8.021795427	1.43E-05	0.000295301	3.632373461	chr17	-	2278354	2282600	Antisense	Up
lnc-MOCS2-3	6.324062886	2.970306812	22.39758487	1.21E-09	2.05E-07	11.92593488	chr5	-	52410153	52410525	Antisense	Up
lnc-MORC2-1	7.322203102	3.348270594	23.79054825	6.82E-10	1.50E-07	12.30437704	chr22	-	31373501	31373844	Antisense	Up
lnc-MORC2-2	5.93234	6.298419	4.070266	0.002420539	0.02347619	-1.638731	chr22	-	31372500	31374834	Antisense	Up
lnc-MORC2-5	-4.752457008	0.929314826	-7.78673368	1.84E-05	0.000366105	3.39862093	chr22	-	31226531	31228414	Intron	Down
lnc-MPEG1-2	6.383437459	3.004877178	21.20073183	2.03E-09	2.81E-07	11.54220441	chr11	-	58897605	58910488	Sense	Up
lnc-MPHOSPH10-2	7.505340524	3.464023912	25.54413023	3.46E-10	1.06E-07	12.75972651	chr2	+	71409867	71411508	Antisense	Up
lnc-MPHOSPH8-4	5.034288961	1.018487488	7.174169946	3.64E-05	0.000658044	2.704509405	chr13	+	20248763	20250024	Antisense	Up
lnc-MPI-1	9.744618404	4.69111135	27.24566557	1.87E-10	7.92E-08	13.1384226	chr15	+	75192332	75193030	Antisense	Up
lnc-MPP7-8	-5.943229233	2.4304857	-12.80772717	2.25E-07	9.22E-06	7.61521246	chr10	-	29117838	29125048	Intergenic	Down
lnc-MPPE1-3	7.323213467	6.655868394	4.563826757	0.001135182	0.012529545	-0.846796623	chr18	-	11851412	11852750	Antisense	Up
lnc-MRC2-1	4.391658823	2.679034461	6.544973815	7.68E-05	0.001263662	1.908058069	chr17	+	60783566	60815283	Sense	Up
lnc-MRP63-6	7.064868772	3.334446846	17.24001412	1.43E-08	1.08E-06	10.00001846	chr13	+	21947807	21950797	Intron	Up
lnc-MRPL39-20	4.125115376	1.569120231	9.10209314	4.80E-06	0.000116672	4.7058923	chr21	-	26734129	26734585	Intergenic	Up
lnc-MRPL40-4	6.280294086	4.993842728	6.230194621	0.000113697	0.001778206	1.521079203	chr22	+	19444025	19444485	Antisense	Up
lnc-MRPL41-1	4.649553	5.616768	4.110328	0.002273394	0.02229728	-1.567471	chr9	+	140449362	140454836	Antisense	Up
lnc-MRPL47-2	7.790277701	3.563782289	20.91631572	2.31E-09	3.02E-07	11.44082411	chr3	-	179301049	179301550	Antisense	Up
lnc-MRPL48-1	4.775472542	8.53353412	4.401493538	0.001450736	0.015387076	-1.101003229	chr11	+	73471385	73472115	Antisense	Up
lnc-MRPL9-2	5.618843796	1.479674487	5.734507574	0.000216484	0.003094176	0.881552627	chr1	-	151738961	151739476	Intron	Up
lnc-MRPS11-2	6.597987184	3.986431207	16.81459073	1.80E-08	1.29E-06	9.7714048	chr15	+	89004468	89009180	Antisense	Up
lnc-MRPS16-1	5.296492226	6.001251418	7.813070723	1.78E-05	0.000357181	3.42225009	chr10	-	74992639	75003156	Antisense	Up
lnc-MRPS24-2	6.320513049	3.671550685	9.263934851	4.12E-06	0.000102484	4.85834029	chr7	-	43663963	43667238	Antisense	Up
lnc-MRPS25-5	6.315983437	7.748789214	6.78113763	5.77E-05	0.000981297	2.254879281	chr3	-	15084897	15091609	Antisense	Up
lnc-MRPS27-1	-4.458728	0.8108691	-3.777495	0.00385239	0.03438865	-2.111022	chr5	-	71393373	71404109	Antisense	Down
lnc-MRPS27-10	4.571960999	2.607585643	5.784528622	0.000202558	0.002924114	0.934258222	chr5	-	71533851	71616473	Sense	Up
lnc-MRPS30-8	3.683949	1.090419	4.063425	0.002446653	0.02370198	-1.620253	chr5	+	44826177	44836603	Intergenic	Up
lnc-MRPS5-14	-3.974833	0.5555362	-3.7466	0.004048568	0.03584148	-2.152882	chr2	-	95453468	95472197	Sense	Down
lnc-MRTO4-2	6.371940544	3.757196432	15.74086426	3.34E-08	2.03E-06	9.274957798	chr1	+	19411149	19411455	Intron	Up
lnc-MSI2-5	7.875179778	5.373954174	10.19084999	1.77E-06	5.00E-05	5.680978171	chr17	+	55910001	55913487	Intergenic	Up
lnc-MSMP-2	4.693933867	3.446732471	5.088861198	0.000526974	0.006586541	-0.065829587	chr9	-	35752988	35756610	Sense	Up
lnc-MST1-2	4.835259338	2.900774274	4.884921993	0.000706633	0.008462798	-0.372242527	chr3	-	49700222	49705442	Antisense	Up
lnc-MST1P9-3	-3.494509384	1.348595406	-6.976670987	4.58E-05	0.000803474	2.503342713	chr1	-	17050284	17052211	Intergenic	Down
lnc-MTBP-4	5.651862014	1.857266123	7.958572167	1.53E-05	0.000311809	3.569964182	chr8	+	121550934	121554373	Antisense	Up
lnc-MTERF-7	3.077946309	0.215058419	5.290567731	0.000396581	0.005178085	0.260985785	chr7	-	91518441	91518656	Intergenic	Up
lnc-MTERF-8	3.415485377	1.013148602	7.314246183	3.10E-05	0.000572352	2.858899707	chr7	-	91569190	91570451	Antisense	Up
lnc-MTIF3-2	7.768562402	4.507297029	16.84320223	1.78E-08	1.27E-06	9.799446355	chr13	-	28008285	28008752	Antisense	Up
lnc-MTMR2-1	-3.548936024	1.350849143	-6.564985366	7.49E-05	0.001237448	1.957315204	chr11	-	95595155	95658479	Sense	Down
lnc-MTMR2-2	7.018345957	3.295245015	15.96595207	2.93E-08	1.84E-06	9.402741863	chr11	-	95554873	95555985	Antisense	Up
lnc-MTO1-1	3.664410156	2.684633211	5.277794162	0.000403715	0.005248297	0.209781052	chr6	+	74233340	74280319	Intergenic	Up
lnc-MTR-1	-4.605929552	1.173269257	-4.860173212	0.000732541	0.008718158	-0.328275329	chr1	+	237070070	237091621	Intergenic	Down
lnc-MTRR-7	6.035056036	3.826400157	13.15193413	1.76E-07	7.59E-06	7.836008643	chr5	+	7850989	7878151	Antisense	Up
lnc-MUC20-10	6.214973991	3.000873379	12.16663066	3.59E-07	1.35E-05	7.199091605	chr3	+	195689157	195690563	Antisense	Up
lnc-MUTYH-1	5.163255848	0.900092952	10.60131287	1.25E-06	3.75E-05	6.003316886	chr1	-	45762365	45771290	Antisense	Up
lnc-MYB-13	-6.06839535	1.340832042	-12.76499571	2.32E-07	9.44E-06	7.411797289	chr6	+	136265388	136282959	Sense	Down
lnc-MYC-3	-5.006136141	0.982954268	-6.051526411	0.00014286	0.002167841	1.2975701	chr8	+	130310352	130715825	Antisense	Down
lnc-MYL12A-1	6.279252048	3.046399261	17.96714771	9.69E-09	7.96E-07	10.35832509	chr18	+	3190394	3247275	Antisense	Up
lnc-MYL4-1	8.225846482	3.12028142	33.21358909	2.82E-11	3.31E-08	14.07262371	chr17	+	45247191	45248415	Antisense	Up
lnc-MYL6-2	7.40113277	4.661633414	11.01757633	8.83E-07	2.80E-05	6.352700734	chr12	+	56555564	56557280	Antisense	Up
lnc-MYLPF-3	3.074298729	7.573211566	9.01900126	5.20E-06	0.000124899	4.626754557	chr16	+	30347621	30363926	Antisense	Up
lnc-MYO19-2	-5.379289384	1.13139645	-10.04434038	2.02E-06	5.58E-05	5.509890192	chr17	-	34831793	34842306	Intergenic	Down
lnc-MYO6-10	4.902058034	1.92901858	13.59533348	1.30E-07	5.88E-06	8.022579756	chr6	+	77575438	77584888	Intergenic	Up
lnc-MYO7B-2	5.045963	5.140252	3.736733	0.004113404	0.0363002	-2.180669	chr2	+	128213021	128263373	Antisense	Up
lnc-MYOM1-1	6.054813669	8.630055637	4.656378326	0.0009887	0.011187348	-0.713017818	chr18	-	3255433	3261848	Antisense	Up
lnc-MZT2B-1	4.89874331	1.536599071	16.55140904	2.09E-08	1.41E-06	9.725158802	chr2	+	130887193	130896990	Sense	Up
lnc-NAA11-1	6.56171136	1.345781654	15.22793448	4.55E-08	2.57E-06	8.959494676	chr4	-	79835962	79860349	Sense	Up
lnc-NAA50-1	7.21179655	3.527821771	13.11983528	1.80E-07	7.73E-06	7.840866311	chr3	-	113465718	113466255	Antisense	Up
lnc-NAA50-3	9.072639241	5.745034431	10.867288	9.99E-07	3.12E-05	6.229486681	chr3	-	113518424	113529901	Antisense	Up
lnc-NAA60-1	5.190141	5.894795	4.166796	0.002081821	0.02081871	-1.463967	chr16	+	3415098	3535559	Sense	Up
lnc-NAALADL2-8	-5.488834814	1.723834343	-9.571822373	3.09E-06	8.03E-05	5.072886841	chr3	+	176002926	176015187	Intergenic	Down
lnc-NAB2-1	-2.922404	0.7710057	-3.947587	0.002936937	0.02771962	-1.811261	chr12	+	57480962	57482632	Intergenic	Down
lnc-NAB2-2	4.165291058	6.787440606	7.792291041	1.82E-05	0.000364255	3.40656285	chr12	+	57271764	57492703	Sense	Up
lnc-NBAS-15	6.31242082	6.756112119	7.569320669	2.33E-05	0.000446622	3.163022692	chr2	-	14776708	14778354	Antisense	Up
lnc-NBN-1	-4.891211421	0.992190202	-10.13942821	1.86E-06	5.21E-05	5.588213392	chr8	-	90608314	90769955	Sense	Down
lnc-NBPF15-2	6.457839346	2.842088745	20.18996886	3.23E-09	3.73E-07	11.0307357	chr1	+	148352315	148354746	Intergenic	Up
lnc-NBPF9-4	-4.87898052	1.03390461	-9.796214269	2.52E-06	6.73E-05	5.298884032	chr1	+	145013725	145016968	Antisense	Down
lnc-NCEH1-1	-5.15026405	1.571832696	-6.904118616	4.98E-05	0.000867506	2.412431017	chr3	-	172278677	172313397	Intergenic	Down
lnc-NCKAP1-1	3.998292924	1.17859972	6.851312323	5.31E-05	0.000912904	2.33216983	chr2	-	183948132	183973247	Antisense	Up
lnc-NCOA3-9	-4.801029166	2.08100629	-7.992183458	1.47E-05	0.000303075	3.591150334	chr20	+	46653531	46702929	Intergenic	Down
lnc-NDE1-3	7.340901727	3.02519501	16.73291886	1.89E-08	1.32E-06	9.809263517	chr16	+	15702330	15704420	Antisense	Up
lnc-NDFIP2-13	5.304118529	1.510254927	11.66678933	5.26E-07	1.82E-05	6.829305062	chr13	+	79885961	79889133	Intergenic	Up
lnc-NDUFAB1-1	7.726831783	5.77759291	10.24795518	1.69E-06	4.81E-05	5.68715609	chr16	-	23583179	23583599	Antisense	Up
lnc-NDUFAF2-1	6.719689359	2.373284502	25.66446656	3.31E-10	1.03E-07	12.76467663	chr5	+	60213316	60215400	Antisense	Up
lnc-NDUFAF2-2	3.780350048	6.988569954	11.35425694	6.73E-07	2.24E-05	6.344053478	chr5	+	60457896	60527907	Sense	Up
lnc-NDUFAF3-1	7.481201459	3.837867284	18.48079741	7.43E-09	6.68E-07	10.5369132	chr3	+	49066748	49067139	Antisense	Up
lnc-NDUFB3-3	3.541942482	5.810657174	10.34313248	1.55E-06	4.50E-05	5.684361943	chr2	+	201827782	201880809	Antisense	Up
lnc-NDUFB9-1	5.670912372	1.169802403	8.782951286	6.55E-06	0.000150156	4.403605647	chr8	+	125591871	125592889	Antisense	Up
lnc-NDUFS1-2	2.473031	1.076336	3.570944	0.005381162	0.0451536	-2.45354	chr2	-	206980284	206982288	Sense	Up
lnc-NDUFS6-15	4.517402	3.855696	3.881174	0.003263735	0.03017079	-1.938821	chr5	+	1597164	1599943	Antisense	Up
lnc-NDUFS6-16	3.85314605	0.456083737	8.544741902	8.31E-06	0.00018469	4.170880551	chr5	+	1594740	1611582	Antisense	Up
lnc-NDUFS6-17	5.014117571	2.242324098	10.66590072	1.18E-06	3.58E-05	6.075445414	chr5	+	1576658	1589480	Antisense	Up
lnc-NDUFV1-6	4.851840997	1.42438825	11.49426742	6.02E-07	2.05E-05	6.713883017	chr11	+	67429962	67430223	Intron	Up
lnc-NECAB1-2	-5.958708541	1.279110213	-9.119784226	4.72E-06	0.000115038	4.724114848	chr8	+	91727844	91733159	Intergenic	Down
lnc-NEDD1-8	-5.388534912	1.273158253	-6.895580332	5.04E-05	0.000874128	2.39645596	chr12	+	97867133	97876323	Intron	Down
lnc-NEK5-1	6.920645027	3.013770699	25.51215231	3.51E-10	1.06E-07	12.67788585	chr13	-	52603158	52624034	Antisense	Up
lnc-NEMF-1	8.198142001	3.374731021	7.92186136	1.59E-05	0.000322697	3.53480995	chr14	-	50329253	50329627	Intergenic	Up
lnc-NEURL2-1	4.496522655	2.019011585	9.164157445	4.53E-06	0.00011098	4.764800679	chr20	-	44521332	44522058	Antisense	Up
lnc-NEURL4-1	5.462856	5.399493	4.025513	0.002596861	0.02498926	-1.704998	chr17	-	7255368	7258332	Antisense	Up
lnc-NFAT5-1	7.774259541	3.639626877	33.04886171	2.96E-11	3.31E-08	13.91135743	chr16	+	69743776	69744486	Intron	Up
lnc-NFATC3-1	5.33777106	4.151778887	4.998059287	0.000600058	0.007357088	-0.201446993	chr16	+	68111242	68263048	Sense	Up
lnc-NFKBIB-5	6.675345843	3.538588566	16.57095949	2.07E-08	1.40E-06	9.721478971	chr19	+	39342921	39344120	Antisense	Up
lnc-NFYB-2	-2.629707	0.3512329	-3.558354	0.005492771	0.04596102	-2.372701	chr12	-	104852872	104862733	Intron	Down
lnc-NGFR-1	2.477016517	10.70074342	11.17690106	7.75E-07	2.52E-05	6.445136129	chr17	+	47481442	47482559	Antisense	Up
lnc-NHSL1-2	5.432445769	3.385938327	12.65513058	2.51E-07	1.01E-05	7.530318632	chr6	-	138925153	139018425	Antisense	Up
lnc-NID2-5	8.76222256	5.03363061	14.85258399	5.73E-08	3.06E-06	8.859335716	chr14	-	52464892	52466634	Antisense	Up
lnc-NIN-1	-3.435891	0.3304981	-3.982406	0.00277953	0.02649575	-1.772903	chr14	-	51350293	51353947	Antisense	Down
lnc-NIPAL1-2	6.677282943	3.472040124	10.53818573	1.32E-06	3.92E-05	5.971479899	chr4	+	47841938	47846867	Intron	Up
lnc-NIPBL-1	6.648222032	5.960994794	4.420040749	0.001410378	0.015023796	-1.082005122	chr5	+	36871456	36876605	Antisense	Up
lnc-NIT2-1	3.852179751	1.201417556	4.555232734	0.00114991	0.012648712	-0.83235596	chr3	+	100077111	100080481	Intergenic	Up
lnc-NKX2-5-2	4.909578257	0.838196219	7.657308229	2.11E-05	0.000412157	3.249851552	chr5	-	172571164	172572042	Antisense	Up
lnc-NKX3-1-2	4.386920275	0.797643501	6.196501096	0.000118662	0.001846872	1.505911577	chr8	-	23492388	23493020	Intergenic	Up
lnc-NLN-2	-3.889168	0.6287948	-4.08185	0.002376984	0.023172	-1.615923	chr5	+	65264658	65268220	Intergenic	Down
lnc-NLRP12-2	3.063312828	0.623740517	4.925284587	0.000666456	0.008060115	-0.270524193	chr19	-	54377879	54379303	Antisense	Up
lnc-NLRP2-2	7.527131283	3.427583161	38.2414579	7.31E-12	2.91E-08	14.21558467	chr19	+	55517560	55559454	Antisense	Up
lnc-NLRP3-4	5.778140884	2.444322575	13.10619143	1.82E-07	7.77E-06	7.815649174	chr1	+	247353144	247372435	Antisense	Up
lnc-NMBR-2	-5.644280653	1.433030552	-4.952132651	0.000641089	0.00778464	-0.269605394	chr6	-	141128739	141219567	Intergenic	Down
lnc-NME4-1	4.439168268	0.753891993	5.998569679	0.000152988	0.002295694	1.259388562	chr16	+	432240	442960	Sense	Up
lnc-NME6-2	7.069974783	7.974299521	4.910508857	0.000680873	0.008205995	-0.330483752	chr3	-	48309403	48312995	Antisense	Up
lnc-NMNAT1-3	5.774925401	8.070613391	4.717082662	0.000903651	0.010390864	-0.616866697	chr1	+	9908375	9910212	Antisense	Up
lnc-NMU-4	2.960016461	1.413062679	5.238452103	0.000426567	0.005494141	0.155937731	chr4	-	56830359	56836996	Antisense	Up
lnc-NNT-3	5.105831182	1.637271443	9.207835911	4.34E-06	0.000107404	4.805726425	chr5	+	43484060	43509458	Antisense	Up
lnc-NNT-5	5.591612273	5.097204027	5.711128378	0.000223343	0.003172701	0.821424636	chr5	+	43571509	43577741	Antisense	Up
lnc-NOTCH2-2	-4.097101666	1.613828684	-8.692131277	7.17E-06	0.00016253	4.313868551	chr1	-	120615907	120619716	Intergenic	Down
lnc-NPAS2-2	6.757198489	3.741437255	18.58948641	7.03E-09	6.41E-07	10.42201388	chr2	+	101627701	101628378	Antisense	Up
lnc-NPAT-2	8.080854727	4.944379632	12.0217638	4.01E-07	1.47E-05	7.097707077	chr11	-	107975800	107992411	Antisense	Up
lnc-NPB-3	5.657102	8.295961	4.074364	0.002405036	0.02336377	-1.621793	chr17	+	79890273	79890934	Antisense	Up
lnc-NPHS2-3	4.889920347	1.53193041	9.61966557	2.96E-06	7.71E-05	5.182791261	chr1	-	179560010	179561522	Antisense	Up
lnc-NPIPL2-3	6.544647289	1.38901974	11.55362766	5.75E-07	1.97E-05	6.727278197	chr16	+	74389381	74506276	Antisense	Up
lnc-NPY5R-2	-3.611872	0.481577	-3.673749	0.00455369	0.03943671	-2.277904	chr4	+	163661666	163813536	Intergenic	Down
lnc-NQO2-14	2.607728284	10.37666444	10.2569722	1.67E-06	4.77E-05	5.723011667	chr6	+	2948659	2949838	Antisense	Up
lnc-NQO2-9	-2.329445	0.3526608	-3.528719	0.005765112	0.04780928	-2.408563	chr6	+	2933658	2936387	Intergenic	Down
lnc-NR2C2-1	5.200884384	3.376392735	11.75742379	4.90E-07	1.72E-05	6.891049434	chr3	+	15111613	15136052	Antisense	Up
lnc-NR2F2-7	-5.881022678	1.302651139	-8.162237843	1.23E-05	0.000258957	3.775639657	chr15	+	96533822	96799762	Antisense	Down
lnc-NRIP1-2	-4.319899	1.037338	-3.533327	0.005721866	0.04755448	-2.491893	chr21	-	16741803	16999459	Intergenic	Down
lnc-NRIP2-1	5.219366466	4.423565052	4.563481019	0.001135771	0.012531302	-0.85548973	chr12	-	2906042	2922068	Antisense	Up
lnc-NRIP2-2	4.887304394	8.997983441	5.072163885	0.000539663	0.006709046	-0.083565131	chr12	-	2906301	2913104	Antisense	Up
lnc-NSA2-3	5.370059467	1.945715612	6.194788552	0.00011892	0.001850207	1.495540807	chr5	+	74014116	74018454	Sense	Up
lnc-NSMCE1-1	5.408254094	3.727150998	6.760838524	5.91E-05	0.001002196	2.182834647	chr16	-	27224630	27226314	Antisense	Up
lnc-NSUN6-1	4.115812	1.734347	3.812642	0.003641263	0.03294862	-2.02256	chr10	-	18802043	18834580	Antisense	Up
lnc-NSUN7-1	6.562219014	1.370251596	16.24833819	2.48E-08	1.63E-06	9.430558668	chr4	+	40814795	40828168	Antisense	Up
lnc-NT5DC2-1	6.23123317	4.945659482	14.71729185	6.24E-08	3.28E-06	8.645292475	chr3	-	52570620	52575907	Antisense	Up
lnc-NTAN1-1	5.484633858	8.551939332	4.545582435	0.001166692	0.01281308	-0.882401046	chr16	-	15111962	15114345	Antisense	Up
lnc-NTF3-3	-4.192168	1.099237	-3.790444	0.003773149	0.03383237	-2.024432	chr12	+	5541277	5634785	Sense	Down
lnc-NTSR2-6	2.869494611	10.70390138	8.077684527	1.35E-05	0.00028031	3.68864191	chr2	-	11778004	11781811	Intergenic	Up
lnc-NUB1-4	3.467664904	7.777217417	10.08122497	1.95E-06	5.42E-05	5.566167067	chr7	+	151157940	151165800	Antisense	Up
lnc-NUDT16-1	-5.735410222	1.377805401	-10.66707311	1.18E-06	3.58E-05	6.010150385	chr3	+	131236670	131239724	Intergenic	Down
lnc-NUDT5-1	8.315551217	3.9344947	26.21437791	2.71E-10	9.15E-08	12.77066016	chr10	-	12286749	12288157	Antisense	Up
lnc-NUDT6-3	-4.210008	0.6489098	-3.58854	0.005229114	0.04407231	-2.42263	chr4	-	123803032	123811236	Antisense	Down
lnc-NUP107-1	5.021591322	0.841121339	13.05116984	1.89E-07	7.98E-06	7.717591687	chr12	+	69078374	69080088	Antisense	Up
lnc-NXPH2-3	-4.709406153	1.095996374	-5.80246589	0.000197802	0.002862374	0.96759273	chr2	-	139175853	139259268	Intergenic	Down
lnc-OAZ3-4	-3.977238	0.662161	-3.649304	0.004737592	0.04065057	-2.3201	chr1	+	152095009	152097541	Intergenic	Down
lnc-OAZ3-6	7.977711699	2.982854709	19.45732651	4.58E-09	4.70E-07	10.94414272	chr1	+	151728016	151732387	Antisense	Up
lnc-OBSCN-3	4.064329101	6.424793454	4.335708149	0.001604051	0.016733105	-1.108749646	chr1	+	228581990	228584668	Antisense	Up
lnc-ODF3L2-2	5.978004963	2.825953734	13.52503995	1.36E-07	6.12E-06	8.051913933	chr19	-	490045	507813	Antisense	Up
lnc-ODF4-2	4.188638	4.041078	3.538738	0.005671504	0.04718281	-2.507482	chr17	+	8268880	8284646	Antisense	Up
lnc-ODZ1-6	7.196036103	3.097339408	21.37909731	1.88E-09	2.69E-07	11.57723157	chrX	-	123235613	123236403	Antisense	Up
lnc-OLR1-3	5.657015685	7.986467164	5.464413484	0.000311851	0.004209781	0.478681891	chr12	-	10370461	10372350	Antisense	Up
lnc-OR4F16-3	-4.409749463	1.244786356	-5.630582141	0.000248827	0.003474529	0.78815306	chr1	-	664668	703869	Sense	Down
lnc-OR4F16-8	5.319583705	3.274005082	8.945554583	5.59E-06	0.00013181	4.55462055	chr1	-	564461	569343	Sense	Up
lnc-OR4M2-12	-5.762764899	2.050931953	-15.06998208	5.01E-08	2.77E-06	8.959894018	chr15	+	21904691	21910754	Intergenic	Down
lnc-OR6S1-1	5.553061399	6.628908845	5.193672936	0.000454278	0.005804398	0.121371825	chr14	-	21161638	21175279	Antisense	Up
lnc-OR7C2-1	6.91046656	3.275966988	20.60091378	2.67E-09	3.35E-07	11.33783525	chr19	+	15050245	16748905	Sense	Up
lnc-ORC3-1	7.054371494	4.117523335	19.41339327	4.67E-09	4.73E-07	10.84564511	chr6	+	88410227	88411243	Antisense	Up
lnc-ORC3-2	8.21270631	4.8371844	23.65309252	7.20E-10	1.55E-07	11.95128048	chr6	+	88273569	88275290	Antisense	Up
lnc-ORC4-1	8.313498731	2.968180118	16.9889415	1.64E-08	1.20E-06	9.887529768	chr2	-	148656969	148660525	Antisense	Up
lnc-OSBPL7-1	5.532079317	6.995006551	4.466018778	0.001315383	0.014156107	-1.0052529	chr17	-	45759782	45760049	Antisense	Up
lnc-OSBPL9-3	7.595926632	4.470124209	12.48833453	2.83E-07	1.11E-05	7.41894389	chr1	+	52259656	52264824	Antisense	Up
lnc-OST4-5	2.656606478	6.952079707	4.821518529	0.000775058	0.009153823	-0.388891638	chr2	-	27276485	27277144	Antisense	Up
lnc-OTP-2	-3.930921	0.5698823	-4.153446	0.002125517	0.02114444	-1.478651	chr5	-	77044989	77048014	Intron	Down
lnc-OTP-5	8.760914038	3.899259109	25.82708227	3.12E-10	9.88E-08	12.71783413	chr5	-	76723251	76725632	Antisense	Up
lnc-OTUD6B-1	7.285330014	3.551762117	11.46111061	6.18E-07	2.09E-05	6.69087267	chr8	+	92028815	92030883	Antisense	Up
lnc-OTUD6B-2	8.01552491	3.34438275	16.22371157	2.52E-08	1.64E-06	9.568604722	chr8	+	92075739	92082050	Antisense	Up
lnc-OXNAD1-6	5.694341874	3.232778374	8.886210511	5.92E-06	0.000137491	4.497667043	chr3	+	16296575	16300952	Antisense	Up
lnc-OXSM-2	6.012289955	3.304041936	13.72952307	1.19E-07	5.46E-06	8.213656561	chr3	+	25824529	25831477	Antisense	Up
lnc-P4HA3-1	7.194284462	4.6139001	11.06875367	8.46E-07	2.70E-05	6.392683139	chr11	-	73946845	73958955	Antisense	Up
lnc-PABPC1L2B-2	6.088823351	2.083315779	15.05807632	5.05E-08	2.78E-06	8.929989238	chrX	+	72297161	72297752	Antisense	Up
lnc-PADI1-1	-5.010893746	2.036893483	-5.195789147	0.000452926	0.005792605	0.134813145	chr1	+	17516277	17524112	Intergenic	Down
lnc-PADI4-2	8.445146112	4.779825673	14.19877428	8.70E-08	4.23E-06	8.486642154	chr1	+	17733255	17733878	Antisense	Up
lnc-PAH-3	-6.542419702	2.357373336	-16.4250422	2.25E-08	1.50E-06	9.666657992	chr12	-	103310350	103352188	Sense	Down
lnc-PAICS-2	6.87698025	1.957853504	23.79977984	6.79E-10	1.50E-07	12.23946544	chr4	+	57262477	57263037	Antisense	Up
lnc-PANK1-6	2.805384121	5.8544718	4.72896676	0.000887932	0.01024675	-0.573526957	chr10	-	91597368	91599091	Antisense	Up
lnc-PANK3-13	4.926835953	2.185851398	5.567032016	0.000271143	0.00373993	0.631785647	chr5	-	167975499	167980732	Intergenic	Up
lnc-PANK3-16	-4.888608	1.043383	-3.866714	0.003339826	0.03072479	-1.968066	chr5	-	167444911	167547302	Antisense	Down
lnc-PAPLN-1	6.85934435	6.40868552	5.546868641	0.000278666	0.003827288	0.585817778	chr14	+	73742381	73752205	Antisense	Up
lnc-PARN-10	4.795775364	3.00203122	19.832095	3.82E-09	4.14E-07	10.58078699	chr16	-	14399433	14497016	Antisense	Up
lnc-PARN-14	-4.076565429	0.691503216	-4.668109293	0.000971623	0.011023939	-0.655196755	chr16	-	13932034	13936993	Intergenic	Down
lnc-PARP2-1	7.226943559	2.608084578	19.22335682	5.13E-09	5.10E-07	10.8400465	chr14	+	20773888	20774970	Antisense	Up
lnc-PCCA-2	6.802800614	5.932301247	5.145207426	0.00048646	0.006150007	0.016916134	chr13	+	100737844	100739356	Intergenic	Up
lnc-PCDH1-5	-4.943832082	0.913259376	-4.966143592	0.000628262	0.007646846	-0.244490602	chr5	-	141134500	141211356	Intergenic	Down
lnc-PCDH12-1	7.977677895	4.203916647	12.2351954	3.41E-07	1.29E-05	7.251618793	chr5	-	141350201	141362252	Antisense	Up
lnc-PCGF2-3	2.753795214	10.07418663	8.360086358	1.00E-05	0.00021743	3.984304345	chr17	-	36881811	36886003	Intergenic	Up
lnc-PCK1-2	3.452635291	10.42571064	7.430169729	2.72E-05	0.000509836	2.985947601	chr20	+	56224090	56224500	Intron	Up
lnc-PCK1-4	-4.595409969	0.812293062	-9.667001506	2.83E-06	7.44E-05	5.193739135	chr20	+	56343878	56357386	Intergenic	Down
lnc-PCM1-3	6.380976269	3.077865611	18.19017891	8.63E-09	7.35E-07	10.43485693	chr8	+	17941736	17955160	Sense	Up
lnc-PCNA-1	3.600431	6.073884	4.014308	0.002643093	0.02536891	-1.638473	chr20	-	5170743	5178502	Antisense	Up
lnc-PDAP1-1	4.551156218	5.374853634	4.548736047	0.001161179	0.012759242	-0.864507659	chr7	-	98989670	98995583	Sense	Up
lnc-PDCD4-1	4.235418676	0.759756884	5.73657704	0.000215887	0.003089879	0.887777272	chr10	+	112629500	112631352	Antisense	Up
lnc-PDE4D-1	4.296673629	4.855110284	4.676771095	0.000959215	0.010903064	-0.664399969	chr5	-	59798345	59822213	Antisense	Up
lnc-PDE8A-2	-5.17966995	1.207384342	-8.46449972	9.01E-06	0.000197591	4.092777379	chr15	+	85489790	85496085	Intergenic	Down
lnc-PDF-1	3.499667	3.292707	3.521495	0.005833611	0.04824352	-2.471954	chr16	-	69360393	69361625	Intergenic	Up
lnc-PDGFRL-2	7.752383559	3.884416342	18.30047277	8.15E-09	7.14E-07	10.45525504	chr8	+	17491579	17501580	Sense	Up
lnc-PDSS1-4	5.251277	2.036693	3.916458	0.003085608	0.02886873	-1.844153	chr10	+	27044552	27045476	Antisense	Up
lnc-PDZD7-1	6.693768736	5.106730486	13.34747054	1.54E-07	6.78E-06	7.975445632	chr10	-	102762050	102767512	Sense	Up
lnc-PDZD7-2	6.059801062	1.263786205	17.33954467	1.35E-08	1.03E-06	9.9341758	chr10	-	102740263	102745371	Sense	Up
lnc-PDZD9-1	5.344516584	1.631789968	17.11952041	1.52E-08	1.13E-06	9.794269377	chr16	-	22094576	22103552	Antisense	Up
lnc-PEA15-1	7.106194323	5.378651276	14.76626782	6.05E-08	3.20E-06	8.789015873	chr1	+	160231526	160234521	Antisense	Up
lnc-PEAK1.1-2	5.118604087	1.915407225	5.086707184	0.000528593	0.006596786	-0.033792336	chr15	-	77713043	77776947	Antisense	Up
lnc-PEAK1.1-5	7.101464883	2.571452856	21.29162818	1.95E-09	2.75E-07	11.57904476	chr15	-	77777398	77777941	Antisense	Up
lnc-PER2-5	6.235314632	5.502682263	4.617002329	0.001048399	0.011776823	-0.774231625	chr2	-	239359012	239360879	Antisense	Up
lnc-PEX14-1	5.284973	6.262773	3.922862	0.003054392	0.02861508	-1.859852	chr1	+	10532344	10596629	Sense	Up
lnc-PEX3-1	3.728748466	3.707214994	11.13750147	8.01E-07	2.58E-05	6.415983041	chr6	+	143806115	143828464	Antisense	Up
lnc-PEX7-2	5.367808786	3.167990676	12.92998151	2.06E-07	8.57E-06	7.682930603	chr6	+	136871798	136873692	Antisense	Up
lnc-PFDN4-3	4.716099232	1.537909097	9.513344833	3.26E-06	8.41E-05	5.083494075	chr20	+	52522413	52555874	Intergenic	Up
lnc-PFKFB2-2	3.982549636	8.874801144	5.971200293	0.000158523	0.002364337	1.196722935	chr1	+	207191745	207192245	Antisense	Up
lnc-PFKP-16	-5.40275349	1.312937808	-6.238442393	0.000112516	0.001765682	1.552800643	chr10	+	3954177	4006403	Intergenic	Down
lnc-PGBD5-1	4.002371	3.666798	4.302012	0.00168915	0.01751163	-1.253873	chr1	-	230416057	230417639	Antisense	Up
lnc-PHB2-4	3.477704473	9.9807326	9.685501645	2.78E-06	7.33E-05	5.240172607	chr12	-	7052670	7053767	Antisense	Up
lnc-PHF10-1	5.550449869	1.04414939	13.03751241	1.91E-07	8.04E-06	7.709260979	chr6	-	170125371	170126184	Intergenic	Up
lnc-PHLDB1-1	8.974801908	3.482530985	37.15067051	9.65E-12	2.91E-08	14.62187397	chr11	+	118575315	118620973	Antisense	Up
lnc-PHLPP2-1	5.404057815	3.120809893	20.24566968	3.14E-09	3.67E-07	10.62342974	chr16	-	71657610	71660719	Antisense	Up
lnc-PHRF1-1	4.138028663	2.184734144	12.15130916	3.63E-07	1.36E-05	7.179620188	chr11	+	574140	575388	Antisense	Up
lnc-PHYHIP-1	6.408216555	3.16901793	19.88487101	3.73E-09	4.07E-07	10.92741467	chr8	-	22110021	22132686	Intergenic	Up
lnc-PI4KA-2	8.214899697	2.993887181	31.276832	5.02E-11	4.03E-08	13.67191384	chr22	-	21243493	21245502	Antisense	Up
lnc-PIGB-2	6.644397089	2.989621609	23.8446149	6.67E-10	1.50E-07	12.29101902	chr15	+	55456635	55486766	Antisense	Up
lnc-PIGG-2	6.817111376	5.241233367	5.697303361	0.000227509	0.00322023	0.79336927	chr4	+	433847	438220	Antisense	Up
lnc-PIGL-1	6.189679178	2.118922089	15.75351978	3.32E-08	2.02E-06	9.337148065	chr17	+	16229798	16250988	Antisense	Up
lnc-PIGN-1	5.104144794	2.231142625	5.088560233	0.0005272	0.006586622	-0.030289148	chr18	-	59898222	59967244	Antisense	Up
lnc-PIGU-3	8.748469998	3.384960458	25.89298964	3.05E-10	9.85E-08	12.81105649	chr20	-	33097347	33097815	Intergenic	Up
lnc-PIGY-5	6.921659395	6.085993278	5.181714064	0.000462001	0.005888857	0.064164904	chr4	-	89341504	89364068	Antisense	Up
lnc-PINK1-2	9.43157996	4.464247709	32.99749095	3.01E-11	3.31E-08	14.04270849	chr1	+	21069479	21070455	Intron	Up
lnc-PKLR-1	6.157535	6.708497	3.811572	0.00364751	0.03299329	-2.049658	chr1	-	155279828	155280381	Antisense	Up
lnc-PKNOX1-1	4.840442	1.827087	3.761377	0.00395346	0.03513337	-2.093777	chr21	+	44373889	44376488	Intergenic	Up
lnc-PKP4-4	-3.68942	0.4506809	-3.653081	0.004708679	0.04046059	-2.315929	chr2	+	159276466	159281815	Intron	Down
lnc-PLA2G2D-1	5.977509377	2.643386905	10.2102095	1.74E-06	4.93E-05	5.69417287	chr1	-	20415084	20418100	Antisense	Up
lnc-PLA2G7-2	-4.063153	1.151895	-3.719951	0.004226183	0.03712215	-2.139847	chr6	-	46638180	46655902	Antisense	Down
lnc-PLAC8L1-1	3.835986223	0.900611748	7.530607493	2.43E-05	0.000461764	3.079307099	chr5	-	145446284	145447887	Intergenic	Up
lnc-PLAT-4	5.391793	4.824066	3.794919	0.003746164	0.03367039	-2.077458	chr8	-	42027127	42029225	Antisense	Up
lnc-PLCG1-1	5.932194	4.279906	4.239034	0.001861276	0.01898455	-1.369363	chr20	+	39809095	39825797	Antisense	Up
lnc-PLD3-3	6.278735108	4.227046374	10.61973404	1.23E-06	3.70E-05	6.036104639	chr19	+	40818458	40825438	Intergenic	Up
lnc-PLD6-1	4.884580982	0.770144853	12.5960751	2.62E-07	1.04E-05	7.43492493	chr17	-	17071259	17088868	Antisense	Up
lnc-PLEKHH1-1	5.701717788	3.739088274	7.040279593	4.25E-05	0.000754408	2.530605009	chr14	+	68066738	68075791	Antisense	Up
lnc-PLXND1-2	5.525804802	3.796955121	8.540837781	8.34E-06	0.000185137	4.161480985	chr3	-	129222569	129226395	Antisense	Up
lnc-PMEL-1	5.372381095	0.936255743	12.35675684	3.12E-07	1.20E-05	7.284102029	chr12	-	56347468	56347884	Antisense	Up
lnc-PMM2-1	5.9430046	4.464365683	13.79475883	1.14E-07	5.28E-06	8.227762334	chr16	+	8947168	8948204	Intron	Up
lnc-PMM2-6	4.27227163	2.81833663	4.507362641	0.001235755	0.013416542	-0.936232823	chr16	+	9198704	9207038	Sense	Up
lnc-PNLIPRP1-1	5.48534267	2.636009616	13.93404324	1.04E-07	4.89E-06	8.339405356	chr10	+	118429613	118432250	Antisense	Up
lnc-PNMA1-1	5.565034029	3.547949427	11.33323286	6.84E-07	2.27E-05	6.594170201	chr14	-	74164805	74167054	Antisense	Up
lnc-PNMA2-1	8.623807678	4.595666839	22.91212856	9.74E-10	1.83E-07	12.0757012	chr8	-	26222805	26228645	Antisense	Up
lnc-PNO1-1	8.302002504	4.310036169	18.27799799	8.24E-09	7.16E-07	10.47693196	chr2	+	68406964	68407664	Intron	Up
lnc-POC1B-GALNT4-2	6.240218338	2.10267279	24.04406719	6.16E-10	1.46E-07	12.27514333	chr12	-	89932992	89941782	Intergenic	Up
lnc-POC5-1	6.638425054	3.173747008	15.72401921	3.37E-08	2.04E-06	9.280518318	chr5	-	74894306	74895205	Antisense	Up
lnc-PODXL-3	8.169811986	4.712548337	11.18307539	7.72E-07	2.51E-05	6.470302207	chr7	-	131178722	131183518	Antisense	Up
lnc-POLE4-6	6.260498113	1.321135741	12.48383563	2.84E-07	1.11E-05	7.358626044	chr2	+	75897114	75897580	Antisense	Up
lnc-POLH-1	8.383150991	3.227599637	28.28931215	1.31E-10	6.60E-08	13.34113288	chr6	+	43529608	43530156	Antisense	Up
lnc-POLR1E-4	6.940569684	3.327629995	23.06716019	9.14E-10	1.73E-07	12.10658988	chr9	+	37511008	37512306	Antisense	Up
lnc-POLRMT-5	2.409903	5.857811	4.162642	0.002095315	0.02091864	-1.423131	chr19	-	582835	583498	Antisense	Up
lnc-POTEB-5	-5.817189396	2.368183872	-15.02301634	5.16E-08	2.83E-06	8.86474651	chr15	-	22541115	22546063	Intergenic	Down
lnc-POTEF-4	-2.948774545	0.752321988	-6.799696762	5.64E-05	0.000963678	2.261572685	chr2	-	130324222	130351825	Intergenic	Down
lnc-POTEM-4	5.096383533	3.379132389	5.335269258	0.00037266	0.004910216	0.291329246	chr14	-	20145802	20147175	Intergenic	Up
lnc-POU5F1B-10	-6.719058064	1.949645103	-14.68642654	6.36E-08	3.32E-06	8.561511034	chr8	+	128196161	128215640	Antisense	Down
lnc-PPAP2A-1	7.899823364	2.953969824	21.30649738	1.94E-09	2.74E-07	11.58414664	chr5	-	54717353	54719628	Antisense	Up
lnc-PPDPF-3	4.55186144	0.793776345	8.541713191	8.34E-06	0.000185137	4.168044053	chr20	+	62160050	62162552	Antisense	Up
lnc-PPFIA3-2	3.867111525	0.686818358	6.028353422	0.0001472	0.00222187	1.281084616	chr19	+	49653214	49654278	Sense	Up
lnc-PPIAL4C-9	5.560418003	2.367430813	20.40627117	2.92E-09	3.60E-07	11.28732926	chr1	+	149320440	149375252	Sense	Up
lnc-PPIAL4G-5	-3.331311	0.989773	-4.16924	0.002073925	0.02075961	-1.427235	chr1	-	143211627	143240439	Intergenic	Down
lnc-PPIAL4G-8	-4.745236761	1.528146773	-6.606605914	7.12E-05	0.001184555	2.068826012	chr1	-	142803223	142816004	Intergenic	Down
lnc-PPIC-6	3.894171699	1.608610284	5.718929805	0.000221028	0.003151655	0.862648894	chr5	-	122165931	122166451	Antisense	Up
lnc-PPIF-1	5.755301777	6.047791933	5.165337201	0.000472806	0.006004621	0.053667974	chr10	+	81142083	81169030	Antisense	Up
lnc-PPM1D-1	-5.887158104	1.313648954	-12.48069192	2.85E-07	1.11E-05	7.380774265	chr17	+	58603653	58628159	Intergenic	Down
lnc-PPP1CB-1	7.594241043	4.004376039	18.01864713	9.43E-09	7.81E-07	10.33757377	chr2	+	28936167	28948866	Intergenic	Up
lnc-PPP1R13B-1	4.776062523	2.289569109	15.62229337	3.58E-08	2.13E-06	9.145159587	chr14	-	104320702	104346641	Antisense	Up
lnc-PPP1R14B-1	4.631504397	1.679119735	17.94264763	9.81E-09	8.01E-07	10.33906253	chr11	-	64014410	64016966	Sense	Up
lnc-PPP1R26-1	6.353878917	2.271111118	19.75937415	3.96E-09	4.24E-07	11.03389373	chr9	+	138359933	138364095	Antisense	Up
lnc-PPP1R3A-4	5.056905269	0.874385305	12.02668458	3.99E-07	1.46E-05	7.050346017	chr7	-	114488826	114658645	Antisense	Up
lnc-PPP1R3B-11	4.886006	5.368561	3.716883	0.004247146	0.03727262	-2.210947	chr8	-	9412655	9414030	Antisense	Up
lnc-PPP1R3G-3	-5.266992447	2.343022774	-6.576954992	7.39E-05	0.001221397	1.990064452	chr6	+	4859020	4864476	Intron	Down
lnc-PPP2R3C-4	-5.525991892	1.133184348	-8.482497361	8.85E-06	0.000194519	4.10460297	chr14	-	35668508	35715712	Intron	Down
lnc-PPP2R5B-4	4.259301662	3.073284787	5.824900443	0.000192022	0.002796153	0.982517271	chr11	+	64569640	64570035	Antisense	Up
lnc-PPP4C-1	8.325124432	4.276700928	15.19362741	4.64E-08	2.59E-06	9.035483009	chr16	+	30103638	30104110	Antisense	Up
lnc-PPP4C-8	6.917481344	4.323730332	23.79832312	6.79E-10	1.50E-07	11.94655126	chr16	+	30125432	30125826	Antisense	Up
lnc-PPP4R1-18	7.524221845	6.745046323	7.526556574	2.44E-05	0.000463636	3.094042857	chr18	-	9912312	9914344	Antisense	Up
lnc-PPP4R1L-1	7.570381989	3.803530386	9.984941672	2.13E-06	5.84E-05	5.504846758	chr20	-	56937950	56941646	Antisense	Up
lnc-PRDM13-2	4.65178472	1.992427	6.708536001	6.30E-05	0.001061761	2.130113669	chr6	+	99872746	99881064	Sense	Up
lnc-PRDM14-5	4.037728071	1.055624116	13.00684341	1.95E-07	8.18E-06	7.683295812	chr8	-	70744918	70746460	Intron	Up
lnc-PRDM2-2	4.873563672	1.997522533	14.92020625	5.50E-08	2.96E-06	8.868476395	chr1	+	14023408	14025276	Intergenic	Up
lnc-PRDM4-4	5.307000904	3.169699493	9.806584647	2.50E-06	6.68E-05	5.347090533	chr12	-	108003810	108011498	Antisense	Up
lnc-PRKAB2-1	5.554888077	3.717921657	8.498856394	8.71E-06	0.000191929	4.119912245	chr1	-	146644429	146645134	Intergenic	Up
lnc-PRKAR1A-7	3.516130483	0.343461529	9.465821329	3.41E-06	8.72E-05	5.039080812	chr17	+	66409782	66489811	Sense	Up
lnc-PRL-13	2.186275249	6.486422423	4.35639935	0.001554057	0.016309217	-0.977637028	chr6	-	21594373	21610695	Antisense	Up
lnc-PRMT8-6	3.097855422	0.262288868	6.547981358	7.65E-05	0.001260003	1.961208524	chr12	+	3897539	3899483	Intergenic	Up
lnc-PRPF4B-5	6.947792056	4.462019645	16.44826271	2.22E-08	1.48E-06	9.649144921	chr6	+	4125588	4129180	Antisense	Up
lnc-PRR11-1	4.362837	4.241429	4.197477	0.001984953	0.02005139	-1.42916	chr17	+	57183958	57195628	Antisense	Up
lnc-PRR15-4	3.901481856	1.591065696	4.686528802	0.000945439	0.010782442	-0.629189404	chr7	+	29688993	29689733	Intron	Up
lnc-PRR15L-2	4.334588669	7.204619716	7.662923161	2.10E-05	0.000410009	3.266463516	chr17	-	46024167	46025641	Antisense	Up
lnc-PRR15L-3	3.888961932	2.796838164	4.867758171	0.000724495	0.008637142	-0.399415785	chr17	-	46007047	46010472	Intron	Up
lnc-PRR15L-6	5.070842503	4.446547124	5.613442136	0.000254645	0.003545103	0.682767077	chr17	-	45988567	45994468	Intron	Up
lnc-PRR20A-5	-5.452605618	2.566355092	-4.836778669	0.000757966	0.008984952	-0.358074434	chr13	+	56152489	56265126	Intergenic	Down
lnc-PRSS27-2	2.999671353	0.734847544	5.144605689	0.000486874	0.006151529	0.06086958	chr16	-	2692293	2723445	Sense	Up
lnc-PSMB11-1	6.698871193	4.090814612	23.36850278	8.08E-10	1.60E-07	11.21661266	chr14	+	23451906	23468287	Antisense	Up
lnc-PSMC1-1	5.357575652	1.720780389	15.73123828	3.36E-08	2.03E-06	9.303744645	chr14	+	90755300	90755730	Intron	Up
lnc-PSMC3IP-1	4.595347886	7.630753092	17.23157962	1.43E-08	1.08E-06	9.607688643	chr17	-	40722002	40723904	Antisense	Up
lnc-PSMC3IP-3	2.968439	4.229229	3.847244	0.003445232	0.03150287	-1.880821	chr17	-	40704454	40706734	Antisense	Up
lnc-PSME1-1	6.262513967	4.15600229	9.92259183	2.25E-06	6.10E-05	5.444413828	chr14	+	24608653	24609653	Antisense	Up
lnc-PSME4-2	5.933764549	2.004449171	23.35633532	8.12E-10	1.60E-07	12.13729318	chr2	-	54307110	54307417	Intergenic	Up
lnc-PSMG4-11	-5.450126838	1.215898383	-5.493615971	0.000299636	0.00406721	0.522385445	chr6	+	3382788	3397082	Intron	Down
lnc-PSMG4-6	-6.639745228	1.744184942	-10.77758354	1.08E-06	3.32E-05	6.146886827	chr6	+	3217333	3243013	Antisense	Down
lnc-PTDSS1-1	7.628665869	3.751811102	16.83000451	1.79E-08	1.28E-06	9.780909049	chr8	+	97247654	97250262	Antisense	Up
lnc-PTDSS2-1	-5.593883361	1.253708476	-15.3319468	4.27E-08	2.45E-06	8.686547485	chr11	+	507274	515605	Antisense	Down
lnc-PTEN-12	3.608139128	1.364483359	9.415903827	3.57E-06	9.08E-05	4.997659161	chr10	+	89577684	89579020	Sense	Up
lnc-PTGDR2-1	6.06036097	3.024971035	13.7494665	1.17E-07	5.39E-06	8.231283153	chr11	-	60609278	60618554	Sense	Up
lnc-PTGDR2-2	3.631655	6.243996	4.094827	0.002329174	0.02276961	-1.47254	chr11	-	60603468	60610438	Antisense	Up
lnc-PTGER4-4	9.636158357	3.851007723	33.66231506	2.48E-11	3.31E-08	14.16667968	chr5	+	40756151	40763126	Antisense	Up
lnc-PTPLA-2	6.283051743	2.636316406	13.3748664	1.51E-07	6.66E-06	7.96393501	chr10	-	17737707	17742231	Antisense	Up
lnc-PTPN2-6	6.605546095	1.354807539	11.30360685	7.00E-07	2.32E-05	6.514834405	chr18	-	12984692	12991172	Antisense	Up
lnc-PTPN6-1	5.271626259	2.780966196	9.007525286	5.26E-06	0.000125752	4.616916347	chr12	+	7072357	7074545	Sense	Up
lnc-PTPRCAP-1	5.546563	8.140654	4.133111	0.002193952	0.02168083	-1.527881	chr11	-	67198837	67202870	Antisense	Up
lnc-PTPRZ1-3	-3.280094	1.03018	-3.76609	0.003923626	0.03490723	-2.122024	chr7	+	121968522	122080410	Antisense	Down
lnc-PTPRZ1-5	3.551863268	0.371746583	6.873270184	5.17E-05	0.000892719	2.341116126	chr7	+	121731841	121732088	Antisense	Up
lnc-PTRHD1-1	4.34398	4.189529	3.899174	0.003171555	0.02948812	-1.903877	chr2	-	25042237	25043665	Sense	Up
lnc-PTTG1-6	4.922367	3.451518	3.758333	0.003972861	0.03528329	-2.141469	chr5	+	159827822	159847012	Antisense	Up
lnc-PURG-1	4.681645	3.889605	4.245186	0.001843671	0.01881966	-1.35961	chr8	-	31024552	31034683	Antisense	Up
lnc-PUS10-4	2.27143654	0.721648409	5.109785675	0.000511522	0.006420274	-0.003740894	chr2	-	61415608	61450796	Sense	Up
lnc-PUS7-2	6.159542872	1.857609833	8.553205171	8.24E-06	0.000183413	4.171787723	chr7	-	104754466	104755465	Antisense	Up
lnc-PXDC1-12	5.265314265	3.923889135	5.481554136	0.000304618	0.004129469	0.494370942	chr6	-	3848164	3865272	Antisense	Up
lnc-PYCARD-1	5.706658264	5.547865391	5.849324679	0.000185936	0.002717942	1.06880884	chr16	-	31193831	31194606	Antisense	Up
lnc-QDPR-2	6.052978858	2.041361227	13.15377533	1.76E-07	7.59E-06	7.851774605	chr4	-	17632546	17634062	Sense	Up
lnc-RAB15-1	4.215359	5.389882	3.619258	0.00497431	0.04229124	-2.357687	chr14	-	65517921	65520344	Intergenic	Up
lnc-RAB17-2	9.469953654	5.839351332	14.49825129	7.17E-08	3.63E-06	8.658876093	chr2	-	238672594	238674103	Intron	Up
lnc-RAB23-2	3.193376745	7.12550619	11.15247563	7.91E-07	2.56E-05	6.301761724	chr6	-	56979691	57039034	Sense	Up
lnc-RAB3A-3	5.921601958	3.214059109	15.6616419	3.50E-08	2.09E-06	9.276104803	chr19	-	18255331	18262501	Antisense	Up
lnc-RAB3GAP2-1	6.462150497	2.038591016	11.86283706	4.52E-07	1.61E-05	6.946062612	chr1	-	220281669	220304728	Sense	Up
lnc-RABL2A-5	5.093033002	2.742263766	9.053993702	5.03E-06	0.000121347	4.660466453	chr2	+	114450946	114481354	Antisense	Up
lnc-RAD9B-1	8.291190697	3.625717915	14.6643512	6.45E-08	3.36E-06	8.729542018	chr12	+	110939418	110956511	Sense	Up
lnc-RADIL-1	5.061277262	6.948894111	4.995734657	0.000602066	0.00737738	-0.196735643	chr7	-	4807256	4811074	Antisense	Up
lnc-RAG2-1	3.88256	2.68005	3.76996	0.003899298	0.03474803	-2.103695	chr11	-	36616283	36619829	Antisense	Up
lnc-RAI1-1	5.496010652	1.947891713	10.66580436	1.18E-06	3.58E-05	6.066261002	chr17	+	17494741	17513799	Antisense	Up
lnc-RALB-8	4.220324942	2.233870481	4.806555842	0.000792216	0.009314382	-0.491552014	chr2	+	120975055	120977718	Antisense	Up
lnc-RANBP1-1	7.151009836	3.27739631	17.62225577	1.16E-08	9.22E-07	9.928315303	chr22	+	20102916	20103457	Intergenic	Up
lnc-RAPH1-6	6.822992646	2.385418776	34.89714008	1.76E-11	3.31E-08	14.1594047	chr2	-	204102133	204104694	Antisense	Up
lnc-RARS-2	-4.196106	0.6557356	-3.503769	0.006005284	0.04938006	-2.563428	chr5	+	168133571	168147889	Antisense	Down
lnc-RASAL1-1	7.083989847	3.60230839	26.66077684	2.30E-10	8.79E-08	13.00245879	chr12	-	113345432	113455556	Antisense	Up
lnc-RASAL2-3	2.338633668	7.743529527	8.485978963	8.82E-06	0.000194097	4.110758769	chr1	+	177975566	178003938	Antisense	Up
lnc-RB1-2	6.711630215	2.380941208	25.85840792	3.08E-10	9.85E-08	12.81358111	chr13	+	49106975	49107897	Antisense	Up
lnc-RBM10-1	4.375831505	2.826861841	7.590965687	2.27E-05	0.000438677	3.159974928	chrX	+	46985167	46991582	Intergenic	Up
lnc-RBM26-1	4.544489695	3.448336773	4.652446238	0.000994496	0.01124211	-0.725213416	chr13	-	79996142	80003586	Antisense	Up
lnc-RC3H1-1	5.162238108	2.326354482	18.09113217	9.08E-09	7.63E-07	10.39574804	chr1	-	174083004	174129142	Sense	Up
lnc-RCAN3-1	6.11833883	2.019129258	13.47950063	1.41E-07	6.28E-06	8.060217698	chr1	+	24865206	24865735	Intergenic	Up
lnc-RCC1-6	-2.783366	0.3836981	-3.80326	0.003696408	0.03332344	-1.944659	chr1	+	28870971	28873054	Intergenic	Down
lnc-RD3-5	7.006098912	4.33812935	8.102060315	1.31E-05	0.000273892	3.727804525	chr1	-	211565168	211572779	Antisense	Up
lnc-RELL2-1	8.25723558	5.06667838	17.31049333	1.37E-08	1.05E-06	10.04478003	chr5	+	140997980	141006048	Antisense	Up
lnc-REM2-2	5.531531	5.111602	4.200794	0.00197477	0.01996781	-1.425426	chr14	+	23398817	23424771	Sense	Up
lnc-REST-4	5.805045959	1.590415288	9.359066009	3.77E-06	9.50E-05	4.938208488	chr4	+	57826725	57827705	Intergenic	Up
lnc-RFC2-4	5.389583026	1.699139536	18.04638502	9.29E-09	7.74E-07	10.1055324	chr7	-	73586630	73588688	Intergenic	Up
lnc-RFC2-5	-5.089599713	1.039440718	-8.88105271	5.95E-06	0.00013811	4.490883704	chr7	-	73455277	73459294	Antisense	Down
lnc-RFC4-1	9.57134745	4.760570136	21.58079373	1.72E-09	2.58E-07	11.59143297	chr3	-	186499568	186501968	Antisense	Up
lnc-RFPL4B-1	-4.834794011	2.346767569	-4.346323749	0.001578192	0.016512779	-1.076740954	chr6	+	112547114	112670906	Sense	Down
lnc-RFXAP-2	7.597177404	3.227173252	20.3314008	3.02E-09	3.63E-07	11.10908395	chr13	+	37417669	37419983	Antisense	Up
lnc-RG9MTD1-4	-4.086608	0.6838429	-3.530605	0.005747368	0.04772849	-2.478894	chr3	+	101076135	101078086	Intron	Down
lnc-RGS18-6	5.448928299	3.705207223	6.4883093	8.24E-05	0.001346372	1.841340163	chr1	+	190234027	190331400	Antisense	Up
lnc-RGS20-1	4.019219833	7.946348686	7.967088359	1.51E-05	0.000309901	3.583754297	chr8	+	54427729	54428465	Intergenic	Up
lnc-RGS20-3	-4.799427076	0.96622987	-5.465745771	0.000311282	0.00420346	0.48287125	chr8	+	54449619	54452860	Intergenic	Down
lnc-RHBDD3-1	-5.081510868	0.994468931	-10.3194647	1.59E-06	4.57E-05	5.731235245	chr22	-	29637343	29652496	Antisense	Down
lnc-RHBDF1-1	5.525139243	6.352436009	4.861524919	0.0007311	0.008706622	-0.391542263	chr16	-	129422	130119	Antisense	Up
lnc-RHOA-1	4.335123465	5.080765035	5.316664535	0.000382422	0.005014916	0.267774314	chr3	-	49449377	49450431	Sense	Up
lnc-RHOC-1	2.112840246	6.983377407	6.82588243	5.47E-05	0.00093825	2.276247308	chr1	-	113236309	113239243	Antisense	Up
lnc-RHOQ-1	6.942191565	2.486494243	19.21986959	5.14E-09	5.10E-07	10.83872341	chr2	+	46768944	46803388	Sense	Up
lnc-RHOQ-2	6.899996166	2.481209611	21.75249292	1.59E-09	2.44E-07	11.72687273	chr2	+	46762834	46768609	Intergenic	Up
lnc-RIC8A-1	5.617052878	7.377420152	4.923549489	0.000668132	0.008078047	-0.305288087	chr11	+	203622	205470	Intron	Up
lnc-RIC8A-2	3.254759041	0.29732285	5.920510479	0.000169355	0.002504453	1.13295123	chr11	+	207429	208529	Sense	Up
lnc-RIIAD1-3	2.82396224	0.06152392	7.42055541	2.75E-05	0.000514675	2.979224132	chr1	+	151738184	151738865	Intron	Up
lnc-RIMBP3C-3	4.581604225	1.474501231	8.426533234	9.37E-06	0.000204695	4.051589531	chr22	-	21803800	21805329	Antisense	Up
lnc-RIMS3-2	6.829074151	2.49993646	24.15594298	5.90E-10	1.41E-07	12.23344539	chr1	-	40981425	40982846	Antisense	Up
lnc-RIMS3-3	7.40914364	2.561204721	14.90573868	5.55E-08	2.98E-06	8.8822446	chr1	-	40980132	40980729	Antisense	Up
lnc-RIOK1-2	-4.019942	0.5707611	-3.67857	0.004518309	0.03917898	-2.271077	chr6	+	7183315	7185520	Intron	Down
lnc-RIPK2-2	6.025274508	2.046545523	11.71457775	5.07E-07	1.77E-05	6.87619641	chr8	+	90627188	90627723	Intergenic	Up
lnc-RLIM-8	5.121217354	1.137582744	7.005955566	4.42E-05	0.000779313	2.50831755	chrX	-	73229223	73231303	Intron	Up
lnc-RMI1-1	7.909019687	6.579385604	13.97426679	1.01E-07	4.79E-06	8.140197918	chr9	+	86587147	86590692	Intergenic	Up
lnc-RNF113B-2	6.513201	6.335657	3.690475	0.004432164	0.03857929	-2.254373	chr13	-	98674416	98676530	Antisense	Up
lnc-RNF121-5	4.928271311	2.331233198	19.8493392	3.79E-09	4.12E-07	11.02216293	chr11	+	71614239	71615127	Intergenic	Up
lnc-RNF125-2	5.096324092	5.46932142	4.577466247	0.001112217	0.012341213	-0.83858429	chr18	+	29522537	29524119	Antisense	Up
lnc-RNF135-1	2.906060921	2.281385557	4.835325144	0.000759577	0.009001491	-0.398026414	chr17	+	28927362	29420276	Sense	Up
lnc-RNF139-2	6.709773889	4.30404908	10.46959875	1.39E-06	4.10E-05	5.901023412	chr8	+	125562014	125564559	Sense	Up
lnc-RNF146-2	8.768908345	3.661770981	27.12330384	1.96E-10	8.02E-08	12.97547695	chr6	+	127651906	127653253	Antisense	Up
lnc-RNF149-2	8.932638909	4.465124181	15.76465479	3.29E-08	2.02E-06	9.341656517	chr2	-	101635003	101637620	Intron	Up
lnc-RNF166-1	4.720961	4.588955	4.295968	0.001704911	0.01764879	-1.274368	chr16	-	88775364	88776845	Antisense	Up
lnc-RNF208-1	4.471261787	2.235150616	15.77754007	3.27E-08	2.01E-06	9.301992718	chr9	-	140119267	140120896	Antisense	Up
lnc-RNF213-1	3.990156678	0.687448165	5.248790169	0.000420431	0.005426804	0.203016407	chr17	+	78358672	78363688	Intron	Up
lnc-RNF24-1	3.927142	5.287994	4.182012	0.00203317	0.02045446	-1.415908	chr20	-	3907957	3911562	Intergenic	Up
lnc-RNF24-5	6.883103126	3.092734346	14.90199149	5.56E-08	2.98E-06	8.839917353	chr20	-	3856127	3857119	Antisense	Up
lnc-RNF40-1	5.234825	6.541977	3.894906	0.003193158	0.02965433	-1.91591	chr16	+	30789769	30791473	Antisense	Up
lnc-ROS1-2	-3.640869	0.6590566	-4.095718	0.002325931	0.02274491	-1.582173	chr6	-	117583515	117585864	Intergenic	Down
lnc-RP1-286D6.2.1-2	4.324879	6.702284	3.644934	0.004771282	0.04088092	-2.324665	chr1	+	3701571	3702102	Antisense	Up
lnc-RP11-1012A1.4.1-2	5.655329954	4.014991941	4.636526746	0.001018332	0.011485347	-0.745316699	chr14	-	68119016	68119331	Intron	Up
lnc-RP11-10A14.4.1-1	6.15572315	5.227049291	4.905495105	0.000685841	0.008256346	-0.34270577	chr8	+	8998933	9002945	Intron	Up
lnc-RP11-1105G2.3.1-3	5.606142627	1.94712089	10.86309815	1.00E-06	3.13E-05	6.233232096	chr12	-	94288740	94337379	Intergenic	Up
lnc-RP11-116D17.1.1-10	8.371641915	3.231409932	20.6456456	2.61E-09	3.31E-07	11.36722222	chr12	+	116398991	116400538	Intron	Up
lnc-RP11-116D17.1.1-4	-5.15969987	1.207699814	-8.365948785	9.97E-06	0.000216576	3.994689191	chr12	+	115515129	115521152	Intergenic	Down
lnc-RP11-168K9.2.1-2	-3.737921	0.4740113	-3.663866	0.004627128	0.03995687	-2.297839	chr11	+	126891642	126971215	Sense	Down
lnc-RP11-173D9.3.1-3	-5.198172834	1.621203634	-8.04271765	1.40E-05	0.000289694	3.664613068	chr14	+	35700899	35775195	Sense	Down
lnc-RP11-180C1.1.1-8	-4.766349	0.9858461	-3.709192	0.00430018	0.03762411	-2.222538	chr4	-	30008572	30009938	Intergenic	Down
lnc-RP11-181C3.1.1-9	5.982509276	1.584061984	12.01891921	4.02E-07	1.47E-05	7.097954313	chr12	-	98943553	98943953	Antisense	Up
lnc-RP11-210M15.2.1-6	6.139707784	4.183646094	7.022608245	4.34E-05	0.000767066	2.491273258	chr15	-	80872369	80872907	Intergenic	Up
lnc-RP11-279O9.4.1-1	4.734589025	5.726455763	4.850483255	0.00074296	0.00882207	-0.409556244	chr4	+	186509062	186515157	Antisense	Up
lnc-RP11-324D17.2.1-3	-6.998266472	2.546565209	-20.924113	2.30E-09	3.02E-07	11.46059947	chr16	+	54033348	54048240	Intron	Down
lnc-RP11-404L6.2.1-4	-4.788621147	1.488395047	-5.667088501	0.000236909	0.003334827	0.832332652	chr5	+	67124685	67143029	Intergenic	Down
lnc-RP11-404P21.6.1-9	3.119979707	6.930086303	5.91027617	0.000171637	0.002531044	1.220992936	chr14	-	96552847	96560227	Antisense	Up
lnc-RP11-498D10.4.1-1	5.814086445	3.585611373	11.84332871	4.59E-07	1.63E-05	6.962912711	chr16	+	71879898	71919174	Sense	Up
lnc-RP11-537P22.1.1-1	-5.915676074	1.283876386	-10.99751044	8.97E-07	2.84E-05	6.277160965	chr14	+	37709628	37742505	Sense	Down
lnc-RP11-582J16.5.1-4	5.00233067	2.872834182	7.558965636	2.36E-05	0.000450327	3.129912406	chr8	-	22398357	22402918	Antisense	Up
lnc-RP11-6F2.7.1-5	2.435524988	3.682198116	6.344816083	9.84E-05	0.001572212	1.676706502	chr3	+	156465139	156527672	Antisense	Up
lnc-RP11-706O15.1.1-1	2.737114	1.296931	3.585242	0.00525727	0.04424719	-2.313575	chrX	-	3735556	3785832	Sense	Up
lnc-RP11-706O15.1.1-7	-3.204694	0.4178992	-3.717323	0.004244131	0.0372573	-2.20198	chrX	-	3857909	3865896	Intergenic	Down
lnc-RP11-712L6.5.1-3	8.376818225	2.972019723	20.97577591	2.25E-09	3.00E-07	11.39551276	chr11	-	126164201	126167021	Antisense	Up
lnc-RP11-796G6.2.1-3	5.298859372	3.117932218	5.689318103	0.000229954	0.00325005	0.856695597	chr14	+	102262243	102263248	Intron	Up
lnc-RP11-826N14.2.1-5	-2.484988	0.6076935	-3.817235	0.003614581	0.03274814	-2.018823	chr5	-	175532960	175558904	Antisense	Down
lnc-RP11-884K10.5.1-2	-3.582079	0.4466067	-3.804847	0.003687015	0.03326056	-2.031552	chr3	-	53996726	54040496	Intergenic	Down
lnc-RP11-930P14.1.1-1	4.046507463	1.435678226	6.712889127	6.26E-05	0.001057812	2.147955863	chr8	+	41518508	41523176	Intergenic	Up
lnc-RP3-377D14.1.1-7	-5.602829659	2.822792414	-9.654384769	2.86E-06	7.52E-05	5.187355132	chr1	+	142618768	143257763	Antisense	Down
lnc-RP3-486B10.1.1-4	3.224226374	0.46049536	7.374888907	2.89E-05	0.000538443	2.917160385	chr6	+	16761368	16767114	Antisense	Up
lnc-RPF1-1	5.895742644	4.000488704	5.44558322	0.00032001	0.004301876	0.446289295	chr1	+	84971982	85032789	Antisense	Up
lnc-RPL14-2	7.65152472	4.641161475	14.7077894	6.28E-08	3.29E-06	8.774182132	chr3	+	40487843	40494776	Antisense	Up
lnc-RPL19-6	-5.01194071	0.95362588	-10.17160625	1.80E-06	5.07E-05	5.616155096	chr17	+	37399629	37407115	Intergenic	Down
lnc-RPL24-1	4.568617466	0.798175024	8.517268362	8.55E-06	0.000189183	4.143753932	chr3	-	101542636	101543842	Antisense	Up
lnc-RPL30-1	4.646208678	2.951073695	4.390923283	0.001474283	0.015597268	-1.124017696	chr8	-	98737114	98742478	Antisense	Up
lnc-RPS24-3	-4.307158828	1.1816745	-8.959615032	5.51E-06	0.000130644	4.549741471	chr10	+	79938927	80434724	Sense	Down
lnc-RPS24-8	5.68470691	1.899793638	13.75992719	1.16E-07	5.39E-06	8.237222868	chr10	+	79782359	79785863	Antisense	Up
lnc-RPS27L-1	9.392974051	4.854789937	15.7044978	3.41E-08	2.05E-06	9.313146362	chr15	-	63362223	63364110	Antisense	Up
lnc-RPS4XP21-1	6.538344905	4.113895441	19.89216241	3.71E-09	4.07E-07	10.39317439	chr19	-	34790581	34820103	Antisense	Up
lnc-RPS6-3	4.777393	1.708905	4.28287	0.001739611	0.01792369	-1.259346	chr9	-	19371383	19371943	Antisense	Up
lnc-RPUSD2-1	5.79159684	1.191967353	13.33089801	1.56E-07	6.85E-06	7.874987749	chr15	+	40780323	40845449	Antisense	Up
lnc-RRP1B-1	-2.880548	0.3248026	-3.542395	0.005637726	0.04692981	-2.419058	chr21	+	45141572	45158712	Sense	Down
lnc-RRP8-1	4.281562848	7.472014226	4.71761033	0.000902946	0.010388949	-0.534475042	chr11	-	6624871	6625650	Sense	Up
lnc-RSBN1L-2	3.102605	5.004978	3.706267	0.00432053	0.03776942	-2.124756	chr7	+	77313167	77314645	Antisense	Up
lnc-RSPH1-3	-5.508626813	1.364369692	-6.159783306	0.00012434	0.001923573	1.448388273	chr21	-	44068380	44071354	Intergenic	Down
lnc-RTN3-1	5.540116	6.685616	4.209179	0.00194927	0.01973861	-1.412318	chr11	+	63405148	63426434	Antisense	Up
lnc-RTN4IP1-2	-5.587495352	2.26148591	-4.880316362	0.000711379	0.008502597	-0.281144099	chr6	-	107164787	107235416	Sense	Down
lnc-RUNDC3A-1	6.341574	7.583173	3.965411	0.00285522	0.0270644	-1.802327	chr17	+	42396995	42397584	Antisense	Up
lnc-RUNDC3B-1	-6.625891786	1.485631604	-12.98232398	1.99E-07	8.30E-06	7.564206754	chr7	+	87075329	87214789	Antisense	Down
lnc-RUNX1-4	4.405598623	0.629073995	10.21455216	1.74E-06	4.91E-05	5.68829517	chr21	-	36089936	36090503	Antisense	Up
lnc-RWDD3-1	-5.007111985	1.186985605	-7.284228896	3.21E-05	0.000588575	2.830499951	chr1	+	95748251	96020486	Sense	Down
lnc-S100A13-1	8.010297496	3.732899216	20.39581626	2.93E-09	3.61E-07	10.87642719	chr1	-	153615537	153618305	Antisense	Up
lnc-S100A13-2	3.030770033	5.872184011	7.962922243	1.52E-05	0.000310975	3.56802788	chr1	-	153599966	153606873	Antisense	Up
lnc-S100A7A-1	-5.960345601	1.509916268	-7.842307491	1.73E-05	0.000347584	3.434481228	chr1	+	153433283	153441910	Intergenic	Down
lnc-S1PR1-2	-4.934395091	1.644613794	-5.980808985	0.000156556	0.002338326	1.250833526	chr1	+	101616107	101641394	Intergenic	Down
lnc-S1PR2-2	4.712759	4.194899	3.811496	0.003647951	0.03299329	-2.055047	chr19	-	10369784	10370721	Antisense	Up
lnc-SAA2-2	5.169317701	2.326113747	13.09613369	1.83E-07	7.82E-06	7.70580772	chr11	-	18283799	18284297	Intergenic	Up
lnc-SAFB-1	2.914745091	5.531980416	5.187936123	0.000457965	0.005843584	0.206888178	chr19	+	5558184	5581226	Antisense	Up
lnc-SALL1-6	-4.290070049	1.41981681	-6.269649118	0.000108167	0.001708333	1.640297622	chr16	-	51421605	51559447	Intergenic	Down
lnc-SAMD5-1	-4.25241	0.7334698	-3.900786	0.003163431	0.02943147	-1.90896	chr6	+	147981838	148275073	Intergenic	Down
lnc-SAMD5-2	-3.603138	1.564679	-4.13205	0.002197584	0.02170646	-1.452419	chr6	+	148023513	148324506	Intergenic	Down
lnc-SAP30-2	-3.929259169	1.379931402	-5.365731894	0.000357249	0.004739053	0.408614294	chr4	+	174428626	174434499	Intergenic	Down
lnc-SAR1B-1	8.914211047	3.245566793	29.87276863	7.78E-11	5.42E-08	13.37144328	chr5	-	134061116	134063509	Antisense	Up
lnc-SBDS-4	-4.475169246	1.41088674	-7.169172999	3.66E-05	0.000660982	2.717331646	chr7	-	65991074	66007536	Sense	Down
lnc-SBF2-1	-4.125781514	0.856097889	-5.241288442	0.000424874	0.005479084	0.228336408	chr11	-	10323788	10326390	Intergenic	Down
lnc-SBF2-4	2.738235584	4.820573015	4.359336458	0.001547096	0.01624431	-1.05180945	chr11	-	9732892	9737656	Antisense	Up
lnc-SCAND1-5	5.821092291	6.379713691	4.449625644	0.001348449	0.014452459	-1.033776411	chr20	-	34816084	34820716	Antisense	Up
lnc-SCARB2-1	3.811770468	0.438604106	8.95950333	5.51E-06	0.000130644	4.572989268	chr4	-	77155455	77172990	Intron	Up
lnc-SCD-2	6.233903521	2.100575148	18.32982776	8.03E-09	7.05E-07	10.26580166	chr10	+	101989423	101993757	Antisense	Up
lnc-SCGB1D4-1	6.082838872	5.402950736	5.089922168	0.000526178	0.006580533	-0.064618993	chr11	-	62104382	62105562	Antisense	Up
lnc-SCGB2B2-7	-4.945012035	1.145825219	-8.197604487	1.19E-05	0.000251216	3.825320484	chr19	-	35085571	35166604	Antisense	Down
lnc-SCLT1-4	6.421355796	2.271084141	5.142430177	0.000488376	0.006168644	0.048764692	chr4	-	129792446	129794396	Antisense	Up
lnc-SCML4-1	-4.271426595	1.422888386	-4.572589707	0.00112037	0.012405352	-0.766186441	chr6	-	108018502	108021422	Intergenic	Down
lnc-SCN2A-6	4.282186409	1.959274946	15.99808351	2.87E-08	1.82E-06	9.457634111	chr2	+	165802126	165947803	Antisense	Up
lnc-SCN2A-8	2.9152655	0.185961486	7.307703828	3.12E-05	0.000575602	2.857050055	chr2	+	165520362	165527842	Intergenic	Up
lnc-SCNN1B-1	2.512641243	6.397371647	6.072903429	0.00013898	0.002114681	1.445268637	chr16	+	23464327	23468927	Antisense	Up
lnc-SCNN1G-1	4.182329033	0.660485089	5.898249585	0.000174362	0.002563088	1.112571979	chr16	+	23073087	23073553	Intron	Up
lnc-SCRN1-2	-3.767513393	0.745895657	-5.561324096	0.00027325	0.00376527	0.634949212	chr7	-	29652063	29655091	Intergenic	Down
lnc-SDCCAG8-1	6.153958578	5.002355667	4.77250399	0.000832794	0.009701465	-0.542585653	chr1	+	243708833	243711631	Antisense	Up
lnc-SDCCAG8-3	3.975902	2.415597	3.774064	0.003873677	0.03454685	-2.041159	chr1	+	243299199	243303890	Antisense	Up
lnc-SDF2-1	3.411691435	1.021244665	6.708459407	6.30E-05	0.001061761	2.15053953	chr17	-	26997071	26999822	Intron	Up
lnc-SEBOX-1	7.078191981	4.312331197	15.21699839	4.58E-08	2.58E-06	9.047854306	chr17	-	26688622	26689881	Intergenic	Up
lnc-SEC22C-2	6.105854895	2.402366591	22.84006727	1.00E-09	1.86E-07	11.89961722	chr3	-	42643454	42695880	Sense	Up
lnc-SEC23A-3	6.454495772	3.230614066	9.880231184	2.34E-06	6.30E-05	5.413655491	chr14	-	39579097	39583710	Antisense	Up
lnc-SEC24B-1	-3.812694	0.8084433	-3.655726	0.004688542	0.04037882	-2.267821	chr4	+	110224190	110237291	Intergenic	Down
lnc-SEMA4B-2	5.322578	7.100093	4.311827	0.001663879	0.01728392	-1.205531	chr15	+	90617747	90621641	Intergenic	Up
lnc-SEMA5A-10	5.019799412	1.715879138	5.811702797	0.0001954	0.002832515	0.990260723	chr5	-	8460225	8460932	Antisense	Up
lnc-SEMA5B-1	5.468410573	1.00473307	10.89212212	9.78E-07	3.07E-05	6.231894869	chr3	-	122597947	122600320	Antisense	Up
lnc-SENP6-12	5.859415563	2.419026233	7.816999646	1.78E-05	0.000356179	3.396257785	chr6	+	75964561	75968710	Antisense	Up
lnc-SEPT10-2	2.39774	0.0633452	3.836179	0.003506685	0.03195056	-2.006533	chr2	-	110595034	110615987	Sense	Up
lnc-SEPT14-2	7.181522644	2.835558828	20.33151628	3.02E-09	3.63E-07	11.20385414	chr7	-	55840869	55841546	Intergenic	Up
lnc-SEPT7L-2	-4.355140038	1.022996692	-9.069852385	4.96E-06	0.000119785	4.677284319	chr10	-	38934081	39022206	Antisense	Down
lnc-SERAC1-3	4.116497884	7.027733511	5.326675016	0.000377136	0.004958254	0.372781609	chr6	-	158293602	158296242	Antisense	Up
lnc-SERHL2-7	10.29479218	4.150186371	39.51646188	5.34E-12	2.91E-08	14.88094439	chr22	+	43217870	43219332	Antisense	Up
lnc-SERPINB6-1	2.903593247	7.650107656	6.902506513	4.99E-05	0.0008688	2.393184185	chr6	-	2985531	3024735	Antisense	Up
lnc-SERPINE2-1	5.525976172	1.943405988	11.97367578	4.16E-07	1.51E-05	7.059473106	chr2	-	224830417	224832423	Antisense	Up
lnc-SESN3-3	3.406609438	7.685640136	5.281525957	0.000401617	0.005225891	0.283946234	chr11	-	94607216	94658686	Antisense	Up
lnc-SETD1B-3	7.334389379	3.639625364	23.90277276	6.52E-10	1.49E-07	12.30874542	chr12	+	122233119	122237862	Antisense	Up
lnc-SETD5-1	4.304484499	0.614260436	11.40510277	6.46E-07	2.16E-05	6.60772233	chr3	+	9424599	9426060	Sense	Up
lnc-SETD6-1	4.398092302	6.88207419	5.095868485	0.000521744	0.006531458	-0.010069756	chr16	+	58767815	59142878	Antisense	Up
lnc-SETD8-1	6.012191411	3.049347782	16.25225429	2.48E-08	1.63E-06	9.585041096	chr12	+	123848355	123850334	Antisense	Up
lnc-SETDB1-1	4.491372008	6.933890802	7.561283211	2.35E-05	0.000449378	3.155380448	chr1	+	150937735	150938734	Antisense	Up
lnc-SFN-1	4.995297067	0.810000418	11.11349992	8.16E-07	2.62E-05	6.400996056	chr1	+	27202623	27204736	Intergenic	Up
lnc-SGCG-11	6.460207474	3.851023021	8.844648335	6.17E-06	0.000142492	4.457855479	chr13	+	24224964	24228020	Intron	Up
lnc-SGSH-1	5.566973178	3.192045888	7.988362379	1.48E-05	0.000303825	3.581144247	chr17	-	78174483	78180128	Intergenic	Up
lnc-SGSM2-1	3.160293709	6.046550133	9.760526871	2.60E-06	6.90E-05	5.304499687	chr17	+	2288140	2289958	Intron	Up
lnc-SGTB-2	3.087205	5.354559	3.924691	0.003045532	0.02856408	-1.699969	chr5	-	65439983	65440623	Antisense	Up
lnc-SH2D3A-2	5.20375156	1.496723277	6.705032362	6.32E-05	0.001065729	2.11478864	chr19	-	6748303	6751478	Antisense	Up
lnc-SH2D7-3	6.437923673	2.2567242	11.20435665	7.58E-07	2.47E-05	6.497775018	chr15	+	78285746	78287631	Antisense	Up
lnc-SH3BGRL2-9	5.697279476	2.54943782	18.92838085	5.93E-09	5.67E-07	10.685429	chr6	+	80131798	80228894	Antisense	Up
lnc-SH3RF1-2	5.611420329	1.876122642	14.94010928	5.43E-08	2.94E-06	8.911596833	chr4	-	169784943	169927939	Sense	Up
lnc-SH3RF2-1	8.460506667	3.922045689	26.52582875	2.42E-10	8.87E-08	12.95665842	chr5	+	145478968	145499975	Antisense	Up
lnc-SHANK2-3	6.688311943	3.211017341	18.87836289	6.08E-09	5.78E-07	10.71802474	chr11	-	70170976	70173315	Intergenic	Up
lnc-SHANK2-5	6.449602	6.625938	4.225059	0.001901932	0.01932476	-1.386774	chr11	-	70052396	70053496	Antisense	Up
lnc-SHARPIN-2	3.891131822	5.63308246	9.501661184	3.30E-06	8.50E-05	4.960971592	chr8	-	145132904	145134168	Antisense	Up
lnc-SHARPIN-4	7.68076297	4.265411748	22.01128357	1.43E-09	2.25E-07	11.62131932	chr8	-	145154152	145163027	Sense	Up
lnc-SHB-1	3.906618117	0.561664506	7.693192156	2.03E-05	0.000399438	3.284909007	chr9	-	38071264	38074401	Intergenic	Up
lnc-SIAE-1	4.80928	1.749861	4.149037	0.002140163	0.0212598	-1.472237	chr11	-	124539331	124565603	Sense	Up
lnc-SIGLEC16-4	5.752491489	2.991919816	21.1392831	2.09E-09	2.84E-07	11.47913086	chr19	+	50544348	50546041	Sense	Up
lnc-SIK2-1	5.590044199	1.622272682	7.280482082	3.22E-05	0.000590831	2.818772286	chr11	+	111653037	111654663	Antisense	Up
lnc-SIRPG-1	-5.925104011	1.366510441	-9.531535653	3.21E-06	8.29E-05	5.102408626	chr20	-	1753922	1829932	Sense	Down
lnc-SIVA1-1	6.513245582	8.569033162	11.0934481	8.30E-07	2.66E-05	6.338808125	chr14	+	105235685	105236608	Antisense	Up
lnc-SKA2-2	6.895875445	2.458773081	28.39881336	1.26E-10	6.52E-08	13.3355744	chr17	-	57477848	57480664	Intergenic	Up
lnc-SKIV2L2-1	9.106492867	3.965685546	24.60399216	4.95E-10	1.27E-07	12.38074241	chr5	+	54529761	54591029	Antisense	Up
lnc-SLA2-1	6.812728704	3.105506873	35.05304655	1.68E-11	3.31E-08	13.94613198	chr20	-	35220846	35230365	Intron	Up
lnc-SLAMF9-2	3.464689378	1.153189234	5.206845949	0.000445931	0.005711879	0.210239823	chr1	-	159946783	159954309	Antisense	Up
lnc-SLC12A2-3	5.007783	5.59737	3.683018	0.004485918	0.03895423	-2.268999	chr5	+	127292490	127397273	Antisense	Up
lnc-SLC16A3-1	2.921671018	9.899944493	7.299995059	3.15E-05	0.000579897	2.834089535	chr17	+	80200542	80203317	Antisense	Up
lnc-SLC16A6-2	7.756636283	2.806445472	15.21329645	4.59E-08	2.58E-06	9.056517704	chr17	-	66124480	66143664	Antisense	Up
lnc-SLC1A1-6	-5.118858787	0.987157418	-7.568034568	2.33E-05	0.000447054	3.134019675	chr9	+	4483536	4489030	Intergenic	Down
lnc-SLC22A18-1	5.653695	7.387116	3.640615	0.004804815	0.04113453	-2.333651	chr11	+	2965667	2966753	Antisense	Up
lnc-SLC22A18-2	2.347097	6.655496	3.708827	0.004302716	0.03763729	-2.151363	chr11	+	2904451	2909796	Antisense	Up
lnc-SLC22A23-1	4.999879688	5.117239308	8.794001348	6.48E-06	0.000148867	4.413932284	chr6	-	3261779	3266383	Antisense	Up
lnc-SLC23A1-1	4.326607484	8.396130435	5.912399958	0.000171161	0.00252491	1.115169115	chr5	-	138700365	138705406	Sense	Up
lnc-SLC24A5-5	6.529044938	2.183278555	21.18882038	2.04E-09	2.81E-07	11.45732633	chr15	+	48443339	48443970	Antisense	Up
lnc-SLC25A16-2	5.494030054	1.012777448	14.64823929	6.52E-08	3.38E-06	8.630091307	chr10	-	70451420	70452698	Antisense	Up
lnc-SLC25A21-4	6.583845635	3.000972727	18.78522894	6.37E-09	5.96E-07	10.68138705	chr14	-	38064228	38065264	Sense	Up
lnc-SLC25A29-1	9.389708167	5.437249143	25.33198098	3.75E-10	1.08E-07	12.53401749	chr14	-	100745185	100757793	Sense	Up
lnc-SLC25A31-2	5.325480429	3.815881221	4.825926229	0.000770079	0.009110462	-0.461986319	chr4	+	128734172	128741676	Sense	Up
lnc-SLC25A47-2	8.636757009	4.231560314	25.94805458	2.98E-10	9.75E-08	12.77800992	chr14	+	100800126	100820398	Antisense	Up
lnc-SLC25A47-5	3.803138571	1.702592122	8.909788286	5.79E-06	0.000135187	4.522477242	chr14	+	100745712	100749124	Intergenic	Up
lnc-SLC2A1-1	6.153111514	1.23560793	11.89475036	4.41E-07	1.58E-05	6.969671888	chr1	-	43435919	43449027	Antisense	Up
lnc-SLC2A6-2	5.316481705	2.517052986	14.81419882	5.87E-08	3.13E-06	8.844042558	chr9	-	136330157	136332664	Antisense	Up
lnc-SLC30A4-2	4.387690606	8.235843412	8.292034454	1.08E-05	0.000230933	3.918218616	chr15	-	45865723	45925724	Antisense	Up
lnc-SLC35F5-17	4.726988	4.223055	4.019071	0.002623335	0.0252266	-1.721121	chr2	-	114347801	114356084	Antisense	Up
lnc-SLC36A1-5	5.822782502	2.844408702	11.74114035	4.97E-07	1.74E-05	6.878519087	chr5	+	151186315	151190915	Intergenic	Up
lnc-SLC38A8-9	4.82840147	2.295150528	20.78800058	2.45E-09	3.16E-07	11.41795804	chr16	-	83979516	83980778	Intergenic	Up
lnc-SLC39A10-10	6.725903317	5.634882678	4.965223568	0.000629096	0.00765254	-0.25086883	chr2	+	197035607	197037431	Antisense	Up
lnc-SLC39A11-1	-5.44229	2.024466	-3.534471	0.005711173	0.04747504	-2.514559	chr17	-	70319263	70636611	Sense	Down
lnc-SLC39A6-1	7.240635961	2.66385892	26.07387563	2.85E-10	9.38E-08	12.83104012	chr18	-	33759552	33767411	Intergenic	Up
lnc-SLC3A2-1	5.311207	5.142466	4.183997	0.002026913	0.02040133	-1.451127	chr11	+	62599705	62601515	Antisense	Up
lnc-SLC3A2-3	7.226918772	3.2371934	19.07183761	5.53E-09	5.40E-07	10.7202124	chr11	+	62619908	62620313	Antisense	Up
lnc-SLC46A2-1	9.376133724	4.463232485	37.47005235	8.89E-12	2.91E-08	14.70133948	chr9	-	115631917	115636827	Antisense	Up
lnc-SLC4A10-2	5.166293	5.322045	3.857073	0.003391591	0.03112568	-1.977733	chr2	+	162929765	162931679	Antisense	Up
lnc-SLC5A2-3	3.312339063	5.121492781	9.126678709	4.69E-06	0.000114422	4.728428891	chr16	+	31500809	31502181	Antisense	Up
lnc-SLC7A6OS-2	6.56563	6.369505	4.147783	0.002144345	0.0212919	-1.50958	chr16	-	68259871	68263048	Sense	Up
lnc-SLC7A7-2	2.632454456	7.663625612	5.238964265	0.000426261	0.005491887	0.233665852	chr14	-	23238861	23268760	Sense	Up
lnc-SLCO2B1-2	5.061204477	6.800603508	4.448779164	0.00135018	0.014467306	-0.97906679	chr11	+	74971170	74972069	Antisense	Up
lnc-SLCO2B1-3	6.027991777	5.938580157	5.553639077	0.000276115	0.003798491	0.613801657	chr11	+	74975332	74976214	Intron	Up
lnc-SLFN12-1	-5.383412613	1.328091466	-5.664297297	0.000237798	0.00334172	0.75935533	chr17	-	33733702	33737247	Intergenic	Down
lnc-SLMO1-1	2.436264939	6.404829934	4.809991545	0.00078824	0.009275465	-0.480182156	chr18	+	12437679	12448204	Antisense	Up
lnc-SLTM-1	6.844813944	2.62862176	19.19559269	5.20E-09	5.14E-07	10.79015339	chr15	-	59149029	59157262	Antisense	Up
lnc-SMAD4-2	-4.678727401	1.371295274	-7.721374275	1.97E-05	0.000388429	3.331652637	chr18	+	48688001	48692340	Intergenic	Down
lnc-SMARCC2-3	6.441869435	4.157517758	6.263320963	0.000109034	0.00171878	1.571932987	chr12	-	56514473	56522638	Antisense	Up
lnc-SMARCC2-4	3.122562893	1.02611351	4.473761784	0.001300065	0.014009282	-0.956705793	chr12	-	56512751	56513723	Antisense	Up
lnc-SMARCC2-5	8.305675093	4.754812118	18.99963457	5.73E-09	5.51E-07	10.73446882	chr12	-	56498397	56507689	Antisense	Up
lnc-SMARCC2-7	5.69758672	1.387814736	14.21431609	8.61E-08	4.20E-06	8.383951214	chr12	-	56496907	56497292	Intergenic	Up
lnc-SMCR7-2	6.433234825	2.994095618	10.33464579	1.57E-06	4.53E-05	5.80096611	chr17	+	18176223	18178354	Antisense	Up
lnc-SMG1-2	7.011136311	3.758565305	8.781314185	6.56E-06	0.000150247	4.396138986	chr16	-	19131297	19132951	Antisense	Up
lnc-SMG6-3	8.706858498	5.879822657	10.1623348	1.82E-06	5.11E-05	5.649826479	chr17	-	1946193	1946719	Antisense	Up
lnc-SNAPC2-4	4.12501	0.8120872	4.160057	0.002103759	0.02098791	-1.475417	chr19	+	8024006	8024896	Intron	Up
lnc-SNN-5	5.866591277	8.236697082	5.240499054	0.000425345	0.00548346	0.183772909	chr16	+	11643239	11680147	Antisense	Up
lnc-SNRNP35-1	5.905215821	3.050685906	21.6344004	1.68E-09	2.53E-07	11.5948732	chr12	+	123942665	123957701	Sense	Up
lnc-SNTG2-3	6.99131954	3.206665502	21.10127388	2.13E-09	2.87E-07	11.51929912	chr2	+	677185	697371	Antisense	Up
lnc-SNX11-7	-4.35669477	0.875969234	-10.51797815	1.34E-06	3.97E-05	5.853426376	chr17	+	46206812	46208268	Intergenic	Down
lnc-SNX20-3	6.742415375	2.725426411	17.74507028	1.09E-08	8.70E-07	10.2066517	chr16	-	50774820	50776726	Antisense	Up
lnc-SNX20-5	7.529263958	3.322039096	18.70537197	6.63E-09	6.11E-07	10.62412585	chr16	-	50817769	50837249	Antisense	Up
lnc-SNX33-1	6.349855331	5.600765517	4.489791116	0.001268953	0.013712895	-0.971447561	chr15	+	75928479	75931580	Antisense	Up
lnc-SNX33-2	5.277836729	3.567445243	4.526918967	0.001199889	0.0131054	-0.915321569	chr15	+	75917133	75918031	Intron	Up
lnc-SOD3-1	-4.235899689	1.554360275	-6.017675016	0.000149247	0.00224517	1.34482548	chr4	+	24661478	24673191	Intergenic	Down
lnc-SOX15-1	4.520308809	1.017894012	5.785409973	0.000202321	0.002922717	0.94777383	chr17	-	7485281	7487390	Antisense	Up
lnc-SOX15-4	2.970205719	5.900225226	8.213387732	1.17E-05	0.000247749	3.83221403	chr17	-	7463970	7465000	Antisense	Up
lnc-SP110-5	5.262370127	2.444068271	20.6611589	2.60E-09	3.31E-07	11.37506373	chr2	-	231263879	231273488	Antisense	Up
lnc-SP110-8	4.294346097	3.704704272	4.984584302	0.000611797	0.007479092	-0.205309966	chr2	-	231360031	231378009	Intergenic	Up
lnc-SP140-3	3.55847	3.036235	3.683349	0.004483521	0.03894192	-2.264717	chr2	+	230989748	231038939	Antisense	Up
lnc-SP3-1	-2.855212	0.3288176	-3.515809	0.005888109	0.0486173	-2.465396	chr2	-	174745592	174764156	Intergenic	Down
lnc-SPATA12-2	6.484935947	3.360029332	14.00324627	9.89E-08	4.70E-06	8.369839795	chr3	+	57112970	57114129	Intergenic	Up
lnc-SPATA21-3	6.332069	5.979874	4.007603	0.002671169	0.02558327	-1.735739	chr1	-	16781920	16785908	Antisense	Up
lnc-SPATA9-1	6.876690486	7.128816738	5.089694223	0.000526349	0.006580701	-0.065185607	chr5	-	95036952	95067999	Antisense	Up
lnc-SPATC1-1	2.632769	4.385205	3.88038	0.003267864	0.03018227	-1.915027	chr8	+	145104457	145106423	Antisense	Up
lnc-SPERT-4	8.530498652	3.262728626	23.37206299	8.07E-10	1.60E-07	12.20122677	chr13	+	46530610	46533781	Intergenic	Up
lnc-SPG11-3	5.830060831	6.58708641	5.282757588	0.000400927	0.005220161	0.273193218	chr15	-	44694882	44719342	Antisense	Up
lnc-SPIN1-1	-5.7440398	1.166123787	-10.9945609	8.99E-07	2.84E-05	6.31826596	chr9	+	90785940	90794628	Intergenic	Down
lnc-SPIN3-5	6.268734259	2.701447385	24.22844291	5.73E-10	1.39E-07	12.28184279	chrX	-	56311187	56312246	Antisense	Up
lnc-SPINT2-2	-4.335526	1.174944	-3.992867	0.00273399	0.02610461	-1.752447	chr19	+	38735857	38740218	Intergenic	Down
lnc-SPINT2-5	-4.302348871	1.923859325	-6.100488964	0.000134139	0.002050377	1.418783006	chr19	+	38675015	38676905	Intron	Down
lnc-SPP1-1	-5.257244694	1.051685334	-11.05922747	8.53E-07	2.72E-05	6.293385296	chr4	+	88843345	88855577	Intergenic	Down
lnc-SPPL3.1-3	4.07039	7.346843	4.219753	0.001917614	0.0194699	-1.323722	chr12	-	121134926	121137344	Antisense	Up
lnc-SPRED2-11	8.05105287	4.861943383	9.489736546	3.33E-06	8.57E-05	5.065278798	chr2	-	65452778	65455079	Antisense	Up
lnc-SPRYD3-1	5.759582217	7.922713545	18.79638546	6.34E-09	5.94E-07	10.14778978	chr12	-	53408412	53448202	Sense	Up
lnc-SPTBN2-3	6.472475935	2.838614638	11.96810267	4.17E-07	1.51E-05	7.040639351	chr11	-	66432924	66433966	Sense	Up
lnc-SPTBN4-3	3.702545922	0.577128859	5.840351614	0.000188147	0.002744511	1.0276529	chr19	+	40949342	40949994	Intron	Up
lnc-SPTBN5-1	5.963735049	3.91553548	8.130945493	1.27E-05	0.000266643	3.734791275	chr15	-	42117296	42120134	Antisense	Up
lnc-SPTBN5-2	6.122805692	2.021987285	25.66752125	3.31E-10	1.03E-07	12.63012369	chr15	-	42062137	42065278	Intergenic	Up
lnc-SRA1-3	4.699093047	3.684291083	5.687060741	0.00023065	0.003258788	0.784951503	chr5	-	139942027	139971708	Sense	Up
lnc-SRGAP3-2	4.900271248	6.668799328	6.400306212	9.18E-05	0.001482889	1.810454654	chr3	-	9366373	9413338	Antisense	Up
lnc-SRPK2-5	6.264351772	1.702375367	5.848199917	0.000186212	0.00272007	1.034358067	chr7	-	104751150	105029837	Sense	Up
lnc-SRPK2-7	5.254437642	0.905826549	11.24772418	7.33E-07	2.41E-05	6.501961601	chr7	-	104743284	104745930	Antisense	Up
lnc-SRPRB-1	3.205722115	6.506892032	7.389768683	2.85E-05	0.000530432	2.975162663	chr3	+	133543099	133547693	Antisense	Up
lnc-SRPX2-2	8.055696263	7.990642192	10.81267465	1.04E-06	3.24E-05	6.166564496	chrX	+	99929124	99930782	Antisense	Up
lnc-SRSF2-1	2.755022549	1.983366084	4.405233572	0.0014425	0.015311374	-1.097076727	chr17	-	74775768	74778303	Intergenic	Up
lnc-SRSF5-2	4.402170131	7.001442033	9.872037212	2.35E-06	6.33E-05	5.376326421	chr14	+	70346402	70352687	Intron	Up
lnc-SSBP4-2	5.997083266	4.903843491	6.588223656	7.29E-05	0.001206611	1.966160927	chr19	+	18551919	18555242	Antisense	Up
lnc-SSR3-7	-3.908453	1.659874	-3.609104	0.005057076	0.04288158	-2.319746	chr3	-	156359230	156383752	Intergenic	Down
lnc-SSTR1-1	-2.687319	0.7532686	-3.529543	0.005757352	0.04777346	-2.504111	chr14	+	38660187	38672731	Intergenic	Down
lnc-ST3GAL1-1	5.539269751	1.805964836	20.18762258	3.23E-09	3.73E-07	11.1742079	chr8	-	134374741	134421713	Intergenic	Up
lnc-ST6GAL2-1	-5.299523783	1.024084902	-12.05847544	3.90E-07	1.43E-05	6.984367676	chr2	-	107871146	107982329	Sense	Down
lnc-ST7L-1	6.651975111	2.973873937	11.78744312	4.79E-07	1.69E-05	6.934128045	chr1	-	112957338	112958909	Antisense	Up
lnc-ST7L-3	8.162704956	5.076276569	16.64174061	1.99E-08	1.36E-06	9.755065546	chr1	-	113068151	113162418	Sense	Up
lnc-STAG3L4-5	5.190395013	2.265885677	19.43419043	4.63E-09	4.70E-07	10.85970813	chr7	+	66738713	66742413	Intron	Up
lnc-STAP1-12	7.712174876	3.609595025	18.54914384	7.18E-09	6.51E-07	10.52470901	chr4	+	66218273	66241698	Antisense	Up
lnc-STARD9-1	7.420894054	4.491055428	7.813809634	1.78E-05	0.000357066	3.394105321	chr15	+	43031315	43035400	Intergenic	Up
lnc-STAT1-1	6.909470038	2.463677391	19.89095322	3.72E-09	4.07E-07	11.04073169	chr2	-	191798137	191800014	Intron	Up
lnc-STON1-1	-5.721587155	1.209922319	-9.278688442	4.06E-06	0.000101272	4.871919878	chr2	+	48752493	48787278	Sense	Down
lnc-STS-1	5.659787219	1.008280655	14.84642116	5.76E-08	3.07E-06	8.759012869	chrX	+	7065292	7171377	Sense	Up
lnc-STUB1-2	4.850926	5.150931	3.743401	0.004069466	0.03599601	-2.167912	chr16	+	739493	742554	Antisense	Up
lnc-STYX-2	3.027028249	7.621066005	9.495833084	3.31E-06	8.53E-05	5.050563591	chr14	+	53241954	53244458	Antisense	Up
lnc-SUCNR1-4	-4.466976	0.7297288	-3.69512	0.004399016	0.03832734	-2.246617	chr3	+	151663335	151666899	Intergenic	Down
lnc-SUN5-1	-2.329715	0.4543374	-3.504151	0.006001532	0.04936862	-2.443495	chr20	-	31564504	31590443	Sense	Down
lnc-SURF1-1	4.246625292	3.598011428	5.227886832	0.000432938	0.005562488	0.147423894	chr9	-	136222959	136223552	Sense	Up
lnc-SUSD1-1	-6.047697472	2.402508251	-13.19868459	1.71E-07	7.38E-06	7.839755013	chr9	-	114794834	114800010	Intron	Down
lnc-SUSD5-1	5.368817814	1.517852082	6.505438256	8.06E-05	0.001321355	1.914777507	chr3	-	33185595	33189213	Antisense	Up
lnc-SVIL-3	3.85386	6.696542	3.822898	0.003581967	0.03252311	-1.939969	chr10	-	29710567	29711301	Intron	Up
lnc-SWSAP1-1	3.569671942	1.357074226	9.621953302	2.95E-06	7.70E-05	5.18486944	chr19	+	11491559	11492625	Antisense	Up
lnc-SYCP1-1	-3.713026	0.5357842	-3.750776	0.004021448	0.03563912	-2.153035	chr1	+	115379847	115394074	Intergenic	Down
lnc-SYNE2-1	5.812147668	2.669391123	14.8530573	5.73E-08	3.06E-06	8.785537158	chr14	+	64065591	64065966	Intron	Up
lnc-SYNM-2	5.461448349	3.564399189	12.53159257	2.74E-07	1.09E-05	7.427649975	chr15	+	99679521	99685575	Antisense	Up
lnc-SYT13-2	4.004753656	3.384429796	4.622539002	0.001039778	0.011689399	-0.763727614	chr11	-	45168193	45236289	Antisense	Up
lnc-SYT15-3	4.491935496	2.006820052	7.337116611	3.02E-05	0.000559188	2.859058388	chr10	-	46914144	46917230	Intron	Up
lnc-SZT2-2	5.769929	5.743068	4.089961	0.002346983	0.02292763	-1.600167	chr1	+	43850783	43854826	Antisense	Up
lnc-TAF13-2	5.542833614	5.863047373	5.593746858	0.00026151	0.00362333	0.683377046	chr1	-	109630592	109633480	Antisense	Up
lnc-TAF1A-1	7.437800015	3.306520471	25.26065394	3.85E-10	1.10E-07	12.427686	chr1	-	222763364	222765741	Antisense	Up
lnc-TAF1D-1	4.517176124	2.13486338	12.1471838	3.65E-07	1.36E-05	7.182607567	chr11	-	93459819	93462971	Intergenic	Up
lnc-TAF9-7	-3.571923	0.73185	-4.24748	0.001837152	0.01877144	-1.282858	chr5	-	69194136	69194892	Intron	Down
lnc-TAGLN-2	3.577610751	5.920104871	4.342324316	0.001587882	0.016589264	-1.174622471	chr11	+	117075682	117078178	Antisense	Up
lnc-TAL2-2	-5.997862409	1.282071751	-15.94653523	2.96E-08	1.86E-06	9.051598024	chr9	+	108418159	108504764	Sense	Down
lnc-TAOK3-9	4.531765402	11.54638446	20.64579953	2.61E-09	3.31E-07	10.70351698	chr12	-	118582296	118583391	Antisense	Up
lnc-TARBP2-5	3.376589329	0.322697374	4.410348604	0.001431317	0.015213236	-1.07832089	chr12	+	54071094	54071347	Intergenic	Up
lnc-TAS2R42-1	5.002316521	3.80916996	7.6026304	2.25E-05	0.000434268	3.163191082	chr12	-	11318688	11323952	Antisense	Up
lnc-TASP1-10	3.138777791	0.386325807	6.664135525	6.64E-05	0.001113452	2.097267233	chr20	-	13147712	13148970	Intergenic	Up
lnc-TATDN1-2	4.677713672	4.891288906	8.927297588	5.69E-06	0.00013342	4.540069062	chr8	-	125549055	125555843	Antisense	Up
lnc-TBC1D17-1	3.9487	3.078176	3.979028	0.002794402	0.02660854	-1.780921	chr19	+	50373978	50374364	Intron	Up
lnc-TBCB-1	3.013903	5.344206	4.133583	0.002192337	0.02166999	-1.511226	chr19	+	36605190	36606453	Sense	Up
lnc-TBL1XR1-6	-6.09683556	1.60714116	-7.630666852	2.18E-05	0.000422745	3.220190629	chr3	-	176004973	176042942	Intergenic	Down
lnc-TBP-3	7.658240464	4.58996253	9.974138996	2.15E-06	5.88E-05	5.494069586	chr6	+	170886763	170887558	Intron	Up
lnc-TBPL1-3	5.688868135	2.091761801	6.26728474	0.00010849	0.001711044	1.588992337	chr6	+	134309209	134311566	Intron	Up
lnc-TBXAS1-4	2.526035	6.045064	3.512919	0.00591602	0.04879958	-2.365254	chr7	+	139723547	139724022	Antisense	Up
lnc-TCF7-4	3.647866506	1.635411053	6.159583904	0.000124371	0.001923573	1.437076494	chr5	+	133562100	133563518	Intergenic	Up
lnc-TCHP-1	6.728898707	4.990093269	5.515120712	0.00029097	0.003967613	0.540110851	chr12	+	110367649	110421646	Antisense	Up
lnc-TCIRG1-1	4.427873331	6.684615694	4.519014683	0.001214251	0.013238054	-0.917443046	chr11	+	67819099	67821229	Antisense	Up
lnc-TCP1-2	4.880502609	1.34223183	22.16870806	1.33E-09	2.17E-07	11.66403686	chr6	-	160146542	160148128	Antisense	Up
lnc-TCP10L-3	3.299334396	1.23521501	4.367818387	0.001527176	0.016067433	-1.165408739	chr21	-	33887526	33887980	Antisense	Up
lnc-TCTA-1	6.338103807	4.456317272	8.837474104	6.21E-06	0.000143341	4.451056619	chr3	+	49460378	49461864	Intron	Up
lnc-TCTEX1D1-1	4.749489201	1.388488386	11.44170562	6.28E-07	2.12E-05	6.602453345	chr1	+	67292624	67294241	Antisense	Up
lnc-TEFM-5	6.067449242	3.04158101	15.4348581	4.01E-08	2.33E-06	9.154905226	chr17	-	29417804	29422468	Sense	Up
lnc-TEKT1-2	4.157846	4.131744	4.010459	0.002659172	0.02549501	-1.723207	chr17	-	6676149	6679435	Antisense	Up
lnc-TESC-4	6.291097946	2.120992495	24.23523352	5.72E-10	1.39E-07	12.33174028	chr12	-	117468113	117468878	Intergenic	Up
lnc-TFAP2C-4	-3.30503	0.3864997	-3.871332	0.003315323	0.03055313	-1.917426	chr20	+	55260399	55261952	Intergenic	Down
lnc-TFB2M-1	7.252227676	3.366541169	13.94462302	1.03E-07	4.87E-06	8.334077595	chr1	-	246830008	246831638	Antisense	Up
lnc-TGM6-4	3.866734834	6.080619898	4.425895807	0.001397887	0.014905919	-0.957144047	chr20	+	2462502	2465290	Antisense	Up
lnc-THBS4-1	7.114311258	4.046913845	12.40864163	3.00E-07	1.16E-05	7.34849744	chr5	+	79281763	79287066	Antisense	Up
lnc-THBS4-6	6.599302325	5.272205731	4.984294856	0.000612052	0.007480021	-0.225521064	chr5	+	79442899	79443344	Antisense	Up
lnc-THRB-3	4.150082711	0.684179519	5.29004627	0.000396869	0.005178619	0.281659361	chr3	-	24537762	24541071	Antisense	Up
lnc-THRSP-2	7.774576735	3.25584944	24.02764758	6.20E-10	1.46E-07	12.38075566	chr11	+	77726760	77727541	Antisense	Up
lnc-THSD4-4	7.47934799	3.479614366	14.0053591	9.88E-08	4.70E-06	8.382937162	chr15	+	72110736	72115947	Intergenic	Up
lnc-THUMPD2-1	4.54251441	0.664674433	11.1176745	8.14E-07	2.62E-05	6.40395945	chr2	-	39815588	39828261	Antisense	Up
lnc-THUMPD3-4	4.681733	5.201438	3.815838	0.003622674	0.03280725	-2.037658	chr3	+	9429770	9432288	Antisense	Up
lnc-THYN1-1	4.256654	8.064594	3.954512	0.0029049	0.02744822	-1.735637	chr11	-	134130071	134145463	Antisense	Up
lnc-TIAL1-5	-4.475964	0.743755	-3.589577	0.005220291	0.04401569	-2.421051	chr10	-	121440674	121442476	Intergenic	Down
lnc-TICAM1-1	8.925062418	3.485134155	34.86603031	1.77E-11	3.31E-08	14.33896084	chr19	-	4794993	4795571	Antisense	Up
lnc-TIGD1-1	3.589821084	6.991047718	5.268273622	0.000409122	0.005308686	0.312643444	chr2	-	233445657	233476681	Antisense	Up
lnc-TIGD1L2-6	7.15274714	2.560907732	21.40837142	1.85E-09	2.67E-07	11.60992498	chr9	+	32541770	32543014	Intron	Up
lnc-TIGD6-1	5.926227082	4.615647902	5.958824942	0.000161097	0.002395886	1.157803833	chr5	-	149362621	149365756	Antisense	Up
lnc-TIMM9-3	-6.131445943	2.185534633	-11.36836239	6.65E-07	2.22E-05	6.479270139	chr14	-	59041016	59061827	Intergenic	Down
lnc-TK2-2	3.748675	3.490612	4.170728	0.002069131	0.02071658	-1.451839	chr16	-	66613885	66614619	Intron	Up
lnc-TLCD1-3	4.872164932	2.35703915	7.546386428	2.39E-05	0.000455609	3.099853545	chr17	-	27059980	27070120	Antisense	Up
lnc-TLE2-1	4.090353182	4.119097181	4.543229799	0.001170822	0.01284832	-0.821040153	chr19	-	2908387	2926809	Antisense	Up
lnc-TLE3-8	2.320243097	12.26473069	6.029780112	0.000146929	0.002219107	1.276684799	chr15	-	69745159	69746425	Antisense	Up
lnc-TM2D2-1	6.046951553	2.814256982	12.94335039	2.04E-07	8.49E-06	7.726941104	chr8	-	38827878	38830530	Antisense	Up
lnc-TMBIM1-3	3.143858786	7.215748966	4.996391572	0.000601498	0.007372578	-0.043423532	chr2	-	219209579	219209849	Intergenic	Up
lnc-TMC5-1	8.102962756	3.647609867	11.66732591	5.26E-07	1.82E-05	6.846570995	chr16	+	19513010	19513608	Antisense	Up
lnc-TMED5-5	4.096487	4.503215	4.074096	0.002406046	0.02336814	-1.614912	chr1	-	93543457	93583977	Antisense	Up
lnc-TMEM116-1	5.824066889	3.3802365	8.964377911	5.49E-06	0.000130277	4.573759826	chr12	-	112331317	112333002	Intergenic	Up
lnc-TMEM123-1	10.7660531	5.134304299	22.79959343	1.02E-09	1.87E-07	11.90660758	chr11	-	102100581	102101653	Antisense	Up
lnc-TMEM126B-4	-4.376740426	2.080251303	-6.364403234	9.60E-05	0.001541245	1.733434953	chr11	+	84594423	84604599	Intron	Down
lnc-TMEM132B-9	-4.776871994	1.054798922	-6.490283842	8.22E-05	0.001343623	1.903471469	chr12	+	126927026	126957336	Intergenic	Down
lnc-TMEM132D-2	-3.820757	0.5240933	-3.805204	0.003684906	0.03326056	-2.037267	chr12	-	130551505	130553098	Intergenic	Down
lnc-TMEM138-4	7.965582214	3.056665732	22.08167715	1.38E-09	2.21E-07	11.8281173	chr11	+	61114589	61116612	Sense	Up
lnc-TMEM147-1	5.781958214	2.431133041	9.257730676	4.14E-06	0.00010293	4.850971979	chr19	+	36031640	36032480	Antisense	Up
lnc-TMEM150A-1	7.126911343	4.174039553	22.57184269	1.12E-09	1.97E-07	11.71891968	chr2	-	85825775	85830319	Sense	Up
lnc-TMEM150A-3	3.659479432	9.918908066	6.764556033	5.89E-05	0.000998143	2.206796113	chr2	-	85808701	85809137	Antisense	Up
lnc-TMEM156-1	6.430970778	3.452486406	11.9947855	4.09E-07	1.49E-05	7.080873578	chr4	-	39114296	39128438	Intron	Up
lnc-TMEM161B-4	5.38650777	4.553008456	5.502198432	0.000296145	0.004027664	0.548559608	chr5	-	87566340	87583994	Antisense	Up
lnc-TMEM164-2	7.204895233	3.216620753	18.6602567	6.79E-09	6.22E-07	10.6086732	chrX	+	109437413	109438732	Antisense	Up
lnc-TMEM180-3	9.379728604	5.075588413	15.60835065	3.61E-08	2.15E-06	9.208021338	chr10	+	104242795	104243316	Antisense	Up
lnc-TMEM186-1	6.106421	8.13515	4.122926	0.002229097	0.02196068	-1.53549	chr16	-	8873632	8891499	Antisense	Up
lnc-TMEM194B-6	5.449869771	2.211077727	26.45074745	2.49E-10	8.94E-08	12.62305657	chr2	-	191533493	191535668	Antisense	Up
lnc-TMEM22-2	5.039182236	2.35935313	17.00419369	1.62E-08	1.19E-06	9.92663921	chr3	+	136537488	136562164	Sense	Up
lnc-TMEM220-1	7.679051125	4.89377219	14.55944147	6.90E-08	3.52E-06	8.620402738	chr17	-	10644583	10672333	Intron	Up
lnc-TMEM232-4	3.494059	3.552399	3.654908	0.004694756	0.04040223	-2.292803	chr5	-	109624933	110074753	Sense	Up
lnc-TMEM234-1	3.296214283	3.227222788	6.742728675	6.04E-05	0.001022566	2.18594057	chr1	-	32670369	32675448	Antisense	Up
lnc-TMEM234-4	4.571151053	9.409069313	4.694571657	0.000934243	0.010666996	-0.634794315	chr1	-	32658801	32665958	Antisense	Up
lnc-TMEM240-1	4.411313551	1.281567442	9.26357581	4.12E-06	0.000102484	4.850958494	chr1	-	1497725	1499904	Intron	Up
lnc-TMEM27-1	4.592233	3.302498	3.715599	0.004255948	0.03732298	-2.215007	chrX	-	15713760	15715633	Intron	Up
lnc-TMEM38A-2	6.584040299	2.098699472	12.1541641	3.63E-07	1.36E-05	7.145057766	chr19	+	16741553	16754753	Intergenic	Up
lnc-TMEM41B-4	8.180424742	4.213473672	19.458237	4.57E-09	4.70E-07	10.90775698	chr11	-	9438532	9438844	Antisense	Up
lnc-TMEM43-1	4.787124173	5.394006504	4.433199906	0.001382468	0.014765839	-1.05921844	chr3	+	14186222	14189784	Antisense	Up
lnc-TMEM50B-2	8.223100515	4.425539758	15.74216725	3.34E-08	2.03E-06	9.332591429	chr21	-	34804791	34821717	Sense	Up
lnc-TMEM50B-3	8.367502	4.139487408	20.65745233	2.60E-09	3.31E-07	11.34454011	chr21	-	34757299	34787274	Antisense	Up
lnc-TMEM75-8	-6.467179354	2.214594063	-16.26304335	2.46E-08	1.62E-06	9.494382332	chr8	-	128767771	128815392	Antisense	Down
lnc-TMEM85-1	6.199105102	2.580622756	12.30010957	3.25E-07	1.24E-05	7.186500768	chr15	+	34547486	34550033	Antisense	Up
lnc-TMEM85-2	5.069663388	2.471629629	16.674379	1.95E-08	1.35E-06	9.651301452	chr15	+	34530519	34564617	Antisense	Up
lnc-TMEM98-2	5.717878	6.395391	3.974097	0.002816269	0.02675583	-1.784428	chr17	+	31203776	31233602	Antisense	Up
lnc-TMPRSS2-1	5.390785174	3.904906445	6.369710873	9.54E-05	0.00153283	1.686815268	chr21	-	42813320	42814669	Antisense	Up
lnc-TMSB15A-3	5.117210127	1.654974936	7.135656855	3.80E-05	0.000682942	2.651814819	chrX	-	101860008	101862247	Intergenic	Up
lnc-TMSB15A-5	7.767627634	4.95427661	9.643133116	2.89E-06	7.58E-05	5.203461827	chrX	-	101854584	101914640	Antisense	Up
lnc-TMSB15A-6	4.204123378	2.456000072	5.373135777	0.000353608	0.004696171	0.343766792	chrX	-	101973352	101975591	Intergenic	Up
lnc-TMTC3-14	6.437806186	2.831859221	17.27697502	1.40E-08	1.06E-06	10.03234809	chr12	+	89918768	89934079	Antisense	Up
lnc-TMUB2-1	7.713823869	4.659194102	19.59215824	4.29E-09	4.47E-07	10.87336739	chr17	+	42276249	42301142	Antisense	Up
lnc-TMUB2-2	2.956120206	8.942793856	6.483362756	8.29E-05	0.001351969	1.842982404	chr17	+	42269165	42271337	Antisense	Up
lnc-TNFAIP3-5	-6.100919007	1.290632704	-9.562798303	3.12E-06	8.08E-05	5.130319462	chr6	+	137736804	137751988	Intergenic	Down
lnc-TNFRSF11B-2	7.829350625	2.954655975	22.11456515	1.36E-09	2.20E-07	11.78222574	chr8	-	120227350	120259088	Antisense	Up
lnc-TNFRSF1A-3	4.049409375	2.88570096	5.412618166	0.000334852	0.00447693	0.40167557	chr12	-	6418427	6430944	Antisense	Up
lnc-TNIP2-1	7.178395613	4.185067354	16.79396115	1.82E-08	1.30E-06	9.711610773	chr4	-	2837615	2839958	Antisense	Up
lnc-TNN-1	5.739811	4.562072	3.887579	0.003230613	0.02991089	-1.934097	chr1	+	175126669	175127666	Intron	Up
lnc-TNNC2-1	4.062255141	4.458104506	4.511680449	0.00122774	0.013350312	-0.941485426	chr20	-	44470661	44477749	Sense	Up
lnc-TNNT1-1	-5.5446512	1.134048521	-8.810524473	6.38E-06	0.000146915	4.428462748	chr19	-	55622743	55626884	Sense	Down
lnc-TNP1-4	5.62565109	1.431047818	14.61221645	6.67E-08	3.44E-06	8.562839616	chr2	-	217735163	217738655	Intergenic	Up
lnc-TNP1-6	-4.54177285	2.117410412	-5.617073973	0.0002534	0.003530125	0.731084947	chr2	-	217692809	217698159	Intergenic	Down
lnc-TOMM20L-1	6.643188301	2.38253032	20.96221082	2.26E-09	3.00E-07	11.29240358	chr14	+	58865274	58893843	Sense	Up
lnc-TOP1MT-5	5.357031971	3.337816261	8.92262581	5.71E-06	0.000133786	4.533440003	chr8	-	144343416	144344565	Antisense	Up
lnc-TOR1AIP1-1	3.942544884	4.445742099	6.293465154	0.000104971	0.001662242	1.661414309	chr1	+	179836661	179846917	Antisense	Up
lnc-TOR1AIP1-2	6.48881	6.023395	3.682641	0.004488658	0.03896226	-2.268188	chr1	+	179831572	179833589	Intron	Up
lnc-TOR1AIP2-5	4.996882954	6.495303283	4.486798855	0.001274701	0.013771443	-0.932965589	chr1	-	179850741	179851730	Antisense	Up
lnc-TOR3A-1	8.509138185	5.483315318	12.39896583	3.02E-07	1.17E-05	7.351752479	chr1	+	179070797	179074885	Intron	Up
lnc-TOX4-1	4.972211719	1.477651319	10.40479879	1.47E-06	4.30E-05	5.844119518	chr14	+	21989233	21990794	Antisense	Up
lnc-TP53I11-6	4.6750971	0.854136218	6.493269512	8.18E-05	0.001339735	1.896156639	chr11	-	44626057	44626887	Antisense	Up
lnc-TPCN2-1	4.599595615	1.785128656	9.436746777	3.50E-06	8.92E-05	4.994146461	chr11	+	68870960	68876562	Intergenic	Up
lnc-TPSG1-1	3.862128	3.990467	4.246724	0.001839297	0.01878419	-1.328245	chr16	-	1256559	1257124	Antisense	Up
lnc-TRAFD1-1	5.954579	5.70924	3.696868	0.004386609	0.03824783	-2.244879	chr12	+	112694603	112696895	Intergenic	Up
lnc-TRAP1-1	4.407872391	1.424515264	7.015390793	4.37E-05	0.000772388	2.516438062	chr16	-	3700636	3701704	Intergenic	Up
lnc-TRAPPC12-1	7.21071217	6.314109918	18.68892667	6.69E-09	6.15E-07	9.631675268	chr2	+	3523045	3528138	Antisense	Up
lnc-TRAPPC2L-1	4.381046041	4.320541231	4.711110641	0.000911661	0.010459967	-0.630350384	chr16	+	88947445	88950334	Antisense	Up
lnc-TRAPPC4-1	7.26272489	4.275990736	29.04250019	1.02E-10	5.68E-08	12.75343817	chr11	+	118914898	118916205	Antisense	Up
lnc-TREX1-2	4.573373309	6.824394066	8.236131023	1.14E-05	0.000242825	3.862137859	chr3	+	48731726	48732949	Intron	Up
lnc-TRIAP1-2	8.19945666	4.910618783	15.78938321	3.25E-08	2.00E-06	9.343093139	chr12	-	120899495	120901199	Sense	Up
lnc-TRIM16-4	6.387738316	2.062311401	12.83164577	2.21E-07	9.10E-06	7.635283596	chr17	-	15691100	15691519	Antisense	Up
lnc-TRIM6-TRIM34-1	5.852633	5.608283	4.146974	0.002147049	0.02131302	-1.509442	chr11	+	5664411	5687610	Antisense	Up
lnc-TRIM69-1	5.113481376	6.969472653	5.479629108	0.000305421	0.004136335	0.498789302	chr15	+	45118737	45119292	Intergenic	Up
lnc-TRIP10-4	7.081732733	3.166894446	24.07520671	6.09E-10	1.45E-07	12.2473488	chr19	+	6680188	6720573	Antisense	Up
lnc-TRMT11-1	-3.920747	1.209317	-3.792086	0.003763223	0.03377291	-2.015046	chr6	+	126380719	126407973	Intergenic	Down
lnc-TRMT1L-2	4.70217293	1.557211672	13.54044309	1.35E-07	6.09E-06	8.090006017	chr1	-	185140466	185140842	Intron	Up
lnc-TRMT2A-1	7.5440385	5.028128623	22.06899938	1.39E-09	2.21E-07	11.57251491	chr22	-	20098343	20099398	Sense	Up
lnc-TRMT61B-1	2.161040846	0.138202445	6.245197064	0.000111559	0.001751977	1.572886268	chr2	-	28931733	28973597	Intergenic	Up
lnc-TRNT1-1	7.048089001	2.493324269	13.69273538	1.22E-07	5.56E-06	8.194824429	chr3	+	3194625	3195119	Antisense	Up
lnc-TRPV2-5	4.386777227	0.722786702	5.767243178	0.000207257	0.002983723	0.925003544	chr17	+	16449416	16451935	Intergenic	Up
lnc-TRRAP-1	3.819811	6.524439	4.135894	0.00218445	0.02160385	-1.411627	chr7	+	98627848	98645710	Antisense	Up
lnc-TSC1-1	4.673408398	9.240081144	13.19801749	1.71E-07	7.38E-06	7.870113887	chr9	-	135895126	135896294	Intergenic	Up
lnc-TSC2-2	2.474909	-0.0649735	3.502694	0.006015862	0.04943788	-2.515712	chr16	+	2162335	2163343	Antisense	Up
lnc-TSHZ3-2	6.213525672	3.56879139	10.35734477	1.54E-06	4.45E-05	5.815637196	chr19	-	32078945	32086626	Antisense	Up
lnc-TSKS-1	5.340011326	3.532246393	6.512722018	7.99E-05	0.001311106	1.883624284	chr19	-	50311875	50313122	Sense	Up
lnc-TSN-4	4.452514355	0.809173956	6.600276159	7.18E-05	0.001191359	2.012154972	chr2	+	122287997	122290281	Sense	Up
lnc-TSPAN18-2	4.256842	5.874504	3.846389	0.003449939	0.03152281	-1.97718	chr11	+	44951561	44956152	Sense	Up
lnc-TSPYL4-1	8.632904965	4.105447132	22.74034965	1.05E-09	1.89E-07	12.02534663	chr6	-	116565349	116565891	Intergenic	Up
lnc-TSSK6-1	3.288651632	6.810312816	7.741520955	1.93E-05	0.000381255	3.343157002	chr19	-	19465543	19468888	Antisense	Up
lnc-TTC23-5	-4.904112532	1.128222438	-5.586053914	0.000264246	0.003656856	0.654522222	chr15	-	99961345	99972112	Intergenic	Down
lnc-TTC26-4	6.769111228	2.877079536	22.55046006	1.13E-09	1.98E-07	11.9095949	chr7	+	138708092	138708856	Intergenic	Up
lnc-TTC26-5	4.555028552	0.651093022	12.61171983	2.59E-07	1.04E-05	7.444671576	chr7	+	138707696	138707940	Intergenic	Up
lnc-TTC35-7	-4.038707	0.6223388	-3.686317	0.004462057	0.03878771	-2.230992	chr8	+	109584871	109585403	Intergenic	Down
lnc-TTYH3-2	5.008789	6.727677	3.942095	0.002962612	0.02792414	-1.814419	chr7	+	2762817	2764609	Intergenic	Up
lnc-TUBA1C-1	2.866776397	9.56493376	8.337365266	1.03E-05	0.000221989	3.963931949	chr12	+	49521564	49541652	Antisense	Up
lnc-TUBA1C-3	6.807139128	4.120997872	14.62165072	6.63E-08	3.43E-06	8.725861247	chr12	+	49582518	49650272	Antisense	Up
lnc-TUBB2A-1	4.609900568	5.523280092	4.440620515	0.001366988	0.014628659	-1.015534085	chr6	-	3138627	3153296	Antisense	Up
lnc-TUBGCP4-1	6.851304034	3.242499126	30.61648174	6.15E-11	4.75E-08	13.77082195	chr15	+	43661418	43668822	Sense	Up
lnc-TUBGCP6-5	6.834144245	3.063650351	23.9359029	6.43E-10	1.49E-07	12.32757667	chr22	-	50637518	50638976	Antisense	Up
lnc-TUFM-1	7.671837529	4.595914106	30.92978441	5.58E-11	4.40E-08	12.94606893	chr16	-	28841932	28848521	Antisense	Up
lnc-TULP4-1	6.061272202	1.248313356	8.955296994	5.54E-06	0.000130843	4.567840176	chr6	+	158703294	158733691	Intergenic	Up
lnc-TUSC5-5	9.00977354	6.009312597	21.51302847	1.77E-09	2.64E-07	11.58864819	chr17	+	1366962	1368138	Antisense	Up
lnc-TWIST1-1	4.251321004	2.01307104	5.343866895	0.00036824	0.004859625	0.305166025	chr7	-	19039115	19095789	Intergenic	Up
lnc-TXNDC9-1	3.076474	0.354218	3.99209	0.002737348	0.02613071	-1.726822	chr2	-	100018992	100019893	Sense	Up
lnc-TYMS-1	3.35944881	7.198237592	4.798314406	0.000801839	0.009398464	-0.321275033	chr18	+	696224	698160	Antisense	Up
lnc-TYW1-1	6.461199	7.205469	3.839116	0.003490259	0.03182864	-2.006387	chr7	+	66460159	66463842	Sense	Up
lnc-UBAP1-5	5.10719318	7.017973969	5.308816992	0.000386622	0.005059111	0.257867589	chr9	+	34107126	34107655	Antisense	Up
lnc-UBC-1	-3.644485	0.4635297	-3.842082	0.003473761	0.03169201	-1.973526	chr12	-	125343128	125362549	Sense	Down
lnc-UBE2B-1	5.741123783	1.990056068	15.60610583	3.62E-08	2.15E-06	9.25706933	chr5	+	133735185	133737612	Intergenic	Up
lnc-UBE2K-5	3.218438142	0.504688954	4.352881353	0.001562439	0.016368432	-1.126071524	chr4	+	39835388	39835985	Intron	Up
lnc-UBE2N-1	-5.336738451	1.148390656	-8.302095783	1.06E-05	0.0002289	3.930715562	chr12	-	93397190	93771512	Sense	Down
lnc-UBE2Z-1	3.069532869	8.813286068	4.540282481	0.001176019	0.012885059	-0.880288021	chr17	+	47009152	47014462	Antisense	Up
lnc-UBE3A-6	2.731567	4.822034	4.089358	0.002349199	0.02293856	-1.444568	chr15	-	25320793	25321008	Intergenic	Up
lnc-UBFD1-1	2.754954922	7.710379872	6.156211187	0.000124908	0.001931153	1.507535072	chr16	+	23487630	23490537	Antisense	Up
lnc-UBL5-7	4.441594171	1.502529081	6.268456903	0.00010833	0.001710258	1.630375672	chr19	+	9903551	9913112	Intergenic	Up
lnc-UCK1-3	5.231830721	7.167671625	4.800341051	0.000799461	0.009375847	-0.489938315	chr9	-	134374795	134375537	Intergenic	Up
lnc-UGP2-4	8.073739331	3.595225635	29.33955074	9.24E-11	5.68E-08	13.52290994	chr2	+	64309105	64333464	Antisense	Up
lnc-ULBP3-5	-5.256868559	1.207773055	-6.955821931	4.69E-05	0.00082064	2.458271072	chr6	-	150825946	150831436	Intergenic	Down
lnc-UMODL1-5	4.31211	5.384235	4.217142	0.001925379	0.01953451	-1.378684	chr21	+	43159532	43161468	Antisense	Up
lnc-UMODL1-7	6.185765534	2.868387525	21.65600109	1.66E-09	2.52E-07	11.63109538	chr21	+	43305203	43305960	Antisense	Up
lnc-UNC93A-3	5.171934445	2.604839505	13.63543249	1.26E-07	5.74E-06	8.152185747	chr6	+	167764292	167765446	Intergenic	Up
lnc-UPB1-2	3.51881936	0.410762735	7.479359089	2.57E-05	0.000485795	3.049844709	chr22	+	24936028	24936481	Antisense	Up
lnc-URB2-1	3.253718	5.195152	4.190167	0.002007592	0.02023121	-1.343588	chr1	+	229643816	229650019	Sense	Up
lnc-USP25-3	-2.866597	0.9518255	-3.505154	0.005991685	0.04931672	-2.548076	chr21	+	17994100	18017814	Intergenic	Down
lnc-USP28-5	4.324127784	0.795853635	5.917764206	0.000169964	0.002509912	1.156309378	chr11	-	113931026	113932261	Antisense	Up
lnc-USP35-3	8.235795793	4.114147648	19.2794583	4.99E-09	4.99E-07	10.8554978	chr11	+	78035803	78155095	Antisense	Up
lnc-USP37-1	4.251236	4.253302	3.653916	0.004702314	0.04043081	-2.31032	chr2	-	219263465	219263942	Intron	Up
lnc-USP40-2	2.521112113	5.866824943	4.353605483	0.00156071	0.016358512	-0.954663118	chr2	-	234370671	234372610	Antisense	Up
lnc-USP45-1	6.979940012	1.610752976	17.93066661	9.87E-09	8.05E-07	10.15205962	chr6	-	99979222	99979482	Antisense	Up
lnc-USP47-2	5.122464	5.029583	4.196746	0.001987203	0.02006926	-1.375491	chr11	+	11373972	11374854	Antisense	Up
lnc-USP50-1	7.570858669	3.409090118	24.63752552	4.89E-10	1.26E-07	12.52673172	chr15	-	50789391	50790941	Antisense	Up
lnc-USP50-2	7.54290751	2.98330838	17.21790213	1.44E-08	1.08E-06	10.00609372	chr15	-	50786214	50789277	Antisense	Up
lnc-USP7-1	3.262733	6.404775	3.738238	0.004103442	0.03623523	-2.144621	chr16	-	9199690	9201031	Antisense	Up
lnc-USP8-1	5.005580962	0.932061921	6.455302435	8.58E-05	0.001393682	1.825984163	chr15	+	50849797	50852697	Intron	Up
lnc-USPL1-2	-5.945727719	1.650210865	-6.424471642	8.91E-05	0.001442917	1.768988412	chr13	+	30890496	30963377	Antisense	Down
lnc-UTP11L-3	-4.903980244	1.060529132	-4.474268537	0.001299069	0.014002158	-0.996463239	chr1	+	38586872	38676024	Antisense	Down
lnc-UTY-1	3.778956081	0.407719888	8.315206564	1.05E-05	0.000226175	3.938746866	chrY	-	15470989	15591384	Sense	Up
lnc-VAC14-1	-4.651002561	1.2618886	-9.470224802	3.39E-06	8.69E-05	5.012339692	chr16	-	70835985	70840039	Intergenic	Down
lnc-VAT1-1	3.612365658	5.753413797	7.437230339	2.70E-05	0.000506496	3.026554116	chr17	-	41164797	41167836	Sense	Up
lnc-VCAN-1	-4.930073327	1.184094444	-4.803565598	0.000795693	0.009339513	-0.488889385	chr5	+	83680244	83786583	Antisense	Down
lnc-VCL-2	4.117758252	0.690928554	9.328454027	3.87E-06	9.74E-05	4.914125283	chr10	+	75880799	75881121	Intron	Up
lnc-VIPR1-1	3.661956454	9.122257814	10.42879193	1.44E-06	4.23E-05	5.866730589	chr3	+	42589484	42594936	Antisense	Up
lnc-VMAC-1	5.101308496	3.158434234	7.690076264	2.04E-05	0.000400237	3.267065893	chr19	+	5899905	5901522	Antisense	Up
lnc-VN1R2-3	7.798975727	3.639694759	22.5475652	1.13E-09	1.98E-07	11.96666565	chr19	+	53743927	53745166	Intron	Up
lnc-VN1R2-8	6.869828055	4.165141492	11.69299393	5.16E-07	1.80E-05	6.861541288	chr19	+	53643080	53669074	Antisense	Up
lnc-VN1R2-9	5.720428	6.621914	3.894476	0.003195344	0.02966315	-1.921455	chr19	+	53569944	53613152	Antisense	Up
lnc-VPS13D-1	-4.538515118	1.276085918	-7.537243263	2.41E-05	0.000459626	3.135246794	chr1	+	12587485	12589505	Intergenic	Down
lnc-VPS33B-6	4.076482	7.793731	3.507197	0.005971677	0.04918107	-2.457491	chr15	-	91835593	91842399	Antisense	Up
lnc-VPS36-2	4.058457819	0.73072012	5.118253115	0.000505407	0.006356885	0.011774658	chr13	-	53049715	53049947	Antisense	Up
lnc-VPS4B-1	4.433091672	1.400869982	13.28684791	1.60E-07	7.02E-06	7.923285837	chr18	-	61048609	61048864	Intergenic	Up
lnc-VRK3-1	2.362385	4.494988	3.532176	0.005732634	0.04763451	-2.502139	chr19	-	50544348	50546041	Antisense	Up
lnc-VRK3-2	6.124160923	2.807859457	13.63894379	1.26E-07	5.73E-06	8.141688363	chr19	-	50546574	50554292	Antisense	Up
lnc-VSTM2B-9	2.932796437	6.76383836	7.783971529	1.84E-05	0.000366852	3.393722917	chr19	+	28283685	28447494	Sense	Up
lnc-VTCN1-3	5.336451477	3.141637702	22.57537355	1.12E-09	1.97E-07	11.43766595	chr1	-	117907434	117910070	Intergenic	Up
lnc-VWDE-1	5.003920533	2.81182448	9.544711909	3.17E-06	8.20E-05	5.115030247	chr7	-	12609750	12611017	Antisense	Up
lnc-WBSCR22-4	6.00847201	3.735587796	4.519230236	0.001213857	0.013237209	-0.930240039	chr7	+	73093482	73095695	Antisense	Up
lnc-WDPCP-2	5.336315394	2.972795691	5.755022696	0.000210651	0.003026982	0.872312297	chr2	-	63053198	63085573	Antisense	Up
lnc-WDR26-1	-5.366957115	1.040857605	-11.29026389	7.08E-07	2.34E-05	6.461198649	chr1	-	224789941	224803922	Intergenic	Down
lnc-WDR27-1	-5.481903547	1.102749761	-11.89282781	4.42E-07	1.58E-05	6.876053543	chr6	-	169818906	169846389	Intergenic	Down
lnc-WDR34-2	6.046087183	4.554735502	6.108448369	0.000132777	0.002033265	1.34675303	chr9	-	131290818	131314689	Antisense	Up
lnc-WDR41-1	9.480453539	4.02981639	32.07829225	3.94E-11	3.41E-08	13.95484796	chr5	-	76721794	76728984	Sense	Up
lnc-WDR45L-1	8.855565687	4.058969186	21.3662361	1.89E-09	2.69E-07	11.48325058	chr17	-	80560864	80562401	Antisense	Up
lnc-WDR60-11	3.013170874	2.58682782	4.819812366	0.000776994	0.009174101	-0.420488894	chr7	+	158493805	158511689	Antisense	Up
lnc-WDR67-1	6.456903306	2.646097595	23.08161511	9.08E-10	1.73E-07	11.91589417	chr8	+	124014799	124042991	Antisense	Up
lnc-WDR73-7	4.853119	4.934039	3.716004	0.004253173	0.03731318	-2.208053	chr15	-	85177460	85197472	Sense	Up
lnc-WDR73-9	6.409271258	4.220912585	9.379210213	3.69E-06	9.33E-05	4.964090166	chr15	-	85165251	85166468	Antisense	Up
lnc-WDR77-2	6.580342077	3.415593027	14.37831749	7.75E-08	3.84E-06	8.55823998	chr1	-	112004683	112012086	Intergenic	Up
lnc-WDR81-2	8.154148286	4.274653434	24.79588155	4.60E-10	1.23E-07	12.40757352	chr17	+	1524912	1574839	Antisense	Up
lnc-WDR83OS-1	7.595533904	4.825189106	10.10056515	1.92E-06	5.35E-05	5.596210381	chr19	-	12780892	12781837	Antisense	Up
lnc-WDR86-2	8.021277213	3.927284504	13.09300615	1.84E-07	7.82E-06	7.819877951	chr7	-	151062455	151065689	Antisense	Up
lnc-WDSUB1-3	4.595773086	0.907598777	7.60849649	2.23E-05	0.000431867	3.190946971	chr2	-	160411953	160471935	Sense	Up
lnc-WIBG-1	2.623955367	6.096404278	4.453861096	0.001339822	0.014374732	-0.933385037	chr12	-	56360621	56361258	Antisense	Up
lnc-WNT1-2	5.212244752	4.092513293	5.040815697	0.000564377	0.006974831	-0.140767032	chr12	+	49392149	49412988	Antisense	Up
lnc-WNT8A-2	3.365842224	5.330930476	8.925322507	5.70E-06	0.000133567	4.492548211	chr5	+	137368462	137372955	Antisense	Up
lnc-WNT9A-3	3.748704992	0.889159974	5.448921411	0.000318547	0.004284963	0.484803131	chr1	-	227921319	227922072	Sense	Up
lnc-WRNIP1-3	4.688308718	1.45085547	13.70233399	1.21E-07	5.54E-06	8.201446151	chr6	+	2244110	2245808	Antisense	Up
lnc-XPOT-4	-5.284195256	1.118284729	-6.35822934	9.68E-05	0.001551435	1.683795203	chr12	+	64784475	64790835	Intergenic	Down
lnc-XRCC6-1	4.621752576	7.724519066	5.564094338	0.000272225	0.003753621	0.670163957	chr22	+	41994033	41995651	Antisense	Up
lnc-XRN2-10	-4.149801538	1.23159742	-5.821380565	0.000192917	0.002803323	1.047799083	chr20	+	21128343	21134889	Intron	Down
lnc-YIF1A-1	3.502196311	8.499528944	5.768978184	0.00020678	0.002978907	0.943864696	chr11	-	66044249	66044963	Antisense	Up
lnc-YIF1A-4	6.684993226	3.068906326	21.92555681	1.48E-09	2.29E-07	11.78230249	chr11	-	66032247	66033137	Antisense	Up
lnc-YIF1B-1	5.002290643	5.648045791	5.039657073	0.000565314	0.006979243	-0.123816546	chr19	-	38782740	38783088	Antisense	Up
lnc-YPEL5-1	-4.966354478	0.987169977	-8.954412715	5.54E-06	0.000130843	4.558813962	chr2	+	30147349	30152828	Intergenic	Down
lnc-YY1-1	5.636409561	5.683645721	6.545543286	7.68E-05	0.001263277	1.923320951	chr14	+	100757452	100758287	Antisense	Up
lnc-ZAP70-1	4.375246173	0.80343082	5.378328056	0.000351078	0.004669988	0.383580288	chr2	+	98372802	98375517	Antisense	Up
lnc-ZBED4-1	5.677261159	3.04633995	12.38397288	3.06E-07	1.18E-05	7.330370165	chr22	+	50295126	50298224	Antisense	Up
lnc-ZBTB25-2	7.470587804	3.563067605	21.46884894	1.81E-09	2.66E-07	11.64021241	chr14	-	64889652	64915275	Antisense	Up
lnc-ZBTB25-5	4.88791112	0.817883041	8.841268784	6.19E-06	0.000142887	4.459853312	chr14	-	64628927	64629144	Intergenic	Up
lnc-ZBTB37-2	6.083857347	7.439443956	4.947135423	0.000645731	0.007829843	-0.273540972	chr1	+	173834366	173835344	Antisense	Up
lnc-ZBTB4-3	4.644911	6.463108	4.227012	0.001896195	0.01928521	-1.32838	chr17	-	7416340	7417916	Antisense	Up
lnc-ZC3H12B-12	3.63529001	5.995776534	8.03839945	1.40E-05	0.000290876	3.662114393	chrX	+	62736789	62780931	Antisense	Up
lnc-ZC3H6-3	4.787667129	0.964668114	9.529733585	3.21E-06	8.30E-05	5.096231832	chr2	+	113127057	113127714	Intron	Up
lnc-ZCCHC17-7	4.048037732	6.852717079	5.286276704	0.000398962	0.00519808	0.232658243	chr1	+	31756622	31762433	Antisense	Up
lnc-ZCCHC24-7	6.026105389	5.416573015	4.902327545	0.000688999	0.008284826	-0.341938739	chr10	-	81058518	81061950	Antisense	Up
lnc-ZCCHC24-8	-3.600986	1.06833	-3.63794	0.004825713	0.04128977	-2.290709	chr10	-	80928942	80930381	Intron	Down
lnc-ZFAND1-1	5.666547534	5.875273423	4.559409579	0.001142727	0.012579621	-0.863936231	chr8	-	82626674	82645138	Sense	Up
lnc-ZFAND3-4	6.524518024	3.592534995	20.31870867	3.04E-09	3.63E-07	11.21765968	chr6	+	38142930	38144082	Intron	Up
lnc-ZFAT-6	-5.584381004	1.186579742	-10.4487659	1.42E-06	4.16E-05	5.850482492	chr8	-	135873412	135880758	Intron	Down
lnc-ZFC3H1-4	4.625941183	0.872488897	10.24455352	1.69E-06	4.82E-05	5.705741474	chr12	-	72187634	72193407	Intergenic	Up
lnc-ZFC3H1-5	-3.857462	0.5015849	-4.096293	0.002323841	0.02273341	-1.563082	chr12	-	72439928	72451157	Intergenic	Down
lnc-ZFP42-2	-5.028162744	1.179546472	-5.36392953	0.000358142	0.004747337	0.339519079	chr4	+	188534085	188647874	Antisense	Down
lnc-ZFP62-1	6.261530681	5.321097457	5.753326792	0.000211127	0.00303212	0.873961783	chr5	-	180261302	180262712	Antisense	Up
lnc-ZFYVE1-1	6.123496321	2.855169105	13.27298501	1.62E-07	7.07E-06	7.897618314	chr14	-	73523701	73526123	Antisense	Up
lnc-ZFYVE9-1	7.234962333	3.976992682	18.25348961	8.35E-09	7.20E-07	10.44100537	chr1	+	52819158	52819549	Intron	Up
lnc-ZNF101-4	6.110133313	1.24523062	8.993578875	5.33E-06	0.00012717	4.603578082	chr19	+	19821996	19822691	Intron	Up
lnc-ZNF131-10	4.757053137	3.639871215	5.035316254	0.000568837	0.007015429	-0.146368424	chr5	+	43018530	43024564	Antisense	Up
lnc-ZNF146-1	6.160257184	3.876867994	14.65030056	6.51E-08	3.38E-06	8.693875493	chr19	+	36795481	36812260	Sense	Up
lnc-ZNF175-1	5.957859111	1.130427573	13.82822926	1.11E-07	5.19E-06	8.19984989	chr19	+	52094162	52095761	Antisense	Up
lnc-ZNF177-1	2.463914678	7.192400942	6.286911258	0.00010584	0.00167474	1.588693452	chr19	+	9633899	9637304	Intergenic	Up
lnc-ZNF181-2	4.995880953	4.627857284	4.605681368	0.001066265	0.01193264	-0.787126878	chr19	+	35258274	35258584	Antisense	Up
lnc-ZNF213-2	5.011276	4.780522	3.951514	0.002918723	0.02755393	-1.825332	chr16	+	3175529	3184830	Antisense	Up
lnc-ZNF22-2	-4.375478	1.008227	-3.555325	0.005519985	0.0461518	-2.475822	chr10	+	45622765	45681489	Sense	Down
lnc-ZNF235-2	7.785731983	4.068569564	10.63705432	1.21E-06	3.66E-05	6.052086363	chr19	-	44660661	44682394	Antisense	Up
lnc-ZNF238-7	2.053651	-0.10552	3.702799	0.00434479	0.03795769	-2.218244	chr1	+	243456419	243468859	Sense	Up
lnc-ZNF257-5	5.987179033	2.902830413	22.6574599	1.08E-09	1.93E-07	11.99386667	chr19	+	22025859	22026637	Antisense	Up
lnc-ZNF30-1	-4.813920889	1.40782661	-9.204406537	4.36E-06	0.000107536	4.76294362	chr19	+	35414102	35417732	Antisense	Down
lnc-ZNF382-1	6.984232052	1.474569747	15.19748734	4.63E-08	2.59E-06	8.942814802	chr19	+	37129592	37130950	Intron	Up
lnc-ZNF382-2	2.376881314	0.6984603	4.563029562	0.00113654	0.012531302	-0.753887054	chr19	+	37071156	37074507	Antisense	Up
lnc-ZNF385D-3	-2.960662	0.9320302	-3.502135	0.006021369	0.0494637	-2.550713	chr3	-	21603410	22414812	Antisense	Down
lnc-ZNF391-1	3.030297	1.246136	4.287122	0.001728265	0.01783315	-1.24088	chr6	+	27342393	27367327	Sense	Up
lnc-ZNF394-1	5.50919567	1.800040813	13.42270988	1.46E-07	6.49E-06	8.028231084	chr7	-	99084141	99097947	Sense	Up
lnc-ZNF394-2	3.569370661	7.616094874	4.565929907	0.001131608	0.012496696	-0.714155955	chr7	-	99074502	99078842	Antisense	Up
lnc-ZNF397-2	6.118878582	3.347961024	7.119391991	3.88E-05	0.000694286	2.610546589	chr18	+	32821014	32847097	Sense	Up
lnc-ZNF423-3	5.47278168	3.602382936	14.15451768	8.96E-08	4.34E-06	8.45510994	chr16	-	50080339	50100135	Antisense	Up
lnc-ZNF433-1	3.725585	2.749603	4.29168	0.00171619	0.01774358	-1.255646	chr19	-	12105581	12114626	Intergenic	Up
lnc-ZNF44-1	5.947212028	4.181966574	9.674208163	2.81E-06	7.40E-05	5.226509688	chr19	-	12335510	12348964	Intergenic	Up
lnc-ZNF445-4	8.105947922	3.72160352	28.60083819	1.18E-10	6.16E-08	13.33534539	chr3	-	44437628	44440531	Antisense	Up
lnc-ZNF45-2	5.505901731	1.745257774	20.29452759	3.07E-09	3.64E-07	11.17971939	chr19	-	44501047	44507022	Sense	Up
lnc-ZNF45-4	6.257160058	2.798425501	13.05336276	1.89E-07	7.98E-06	7.793860517	chr19	-	44598502	44603864	Antisense	Up
lnc-ZNF460-2	5.749321688	1.11436802	7.6332508	2.17E-05	0.00042221	3.222141952	chr19	+	57815672	57819930	Intergenic	Up
lnc-ZNF479-1	-3.428908	0.6621321	-3.583554	0.005271734	0.04434216	-2.399068	chr7	-	57277571	57289881	Intergenic	Down
lnc-ZNF486-6	6.513276613	4.151693898	12.95103993	2.03E-07	8.46E-06	7.659334087	chr19	+	20378625	20379200	Intergenic	Up
lnc-ZNF506-2	7.920641515	3.91034655	15.89452445	3.05E-08	1.90E-06	9.405091928	chr19	-	19945685	20008579	Antisense	Up
lnc-ZNF514-2	5.497546522	3.141700839	18.74246034	6.51E-09	6.04E-07	10.374062	chr2	-	95836539	95846237	Antisense	Up
lnc-ZNF532-2	4.559051	4.059148	4.060694	0.002457159	0.02379274	-1.638405	chr18	+	56702970	56725174	Sense	Up
lnc-ZNF551-2	6.69742143	3.488777925	13.08121651	1.85E-07	7.88E-06	7.782395155	chr19	+	58212907	58214160	Intron	Up
lnc-ZNF552-2	2.49990036	6.241968181	5.351822326	0.000364199	0.004813384	0.440909155	chr19	-	58329850	58332973	Intergenic	Up
lnc-ZNF575-1	6.774863334	3.33582086	16.34963126	2.34E-08	1.56E-06	9.608654305	chr19	+	44057596	44059646	Antisense	Up
lnc-ZNF582-3	9.191061696	4.65609438	17.55192242	1.21E-08	9.47E-07	10.16169442	chr19	-	56888072	56889161	Antisense	Up
lnc-ZNF583-5	5.583353707	3.061803561	9.231675627	4.25E-06	0.000105251	4.828364438	chr19	+	56825618	56852656	Intergenic	Up
lnc-ZNF585A-3	5.717361419	2.201682584	12.6454645	2.53E-07	1.02E-05	7.528624054	chr19	-	37619580	37632542	Antisense	Up
lnc-ZNF599-3	2.624729	1.017942	4.124292	0.002224347	0.02192421	-1.503988	chr19	-	35339892	35351480	Intergenic	Up
lnc-ZNF613-7	7.084807942	3.720389148	23.9160817	6.48E-10	1.49E-07	12.12425989	chr19	+	52550186	52553075	Antisense	Up
lnc-ZNF639-1	-4.880953784	1.061439573	-4.591123671	0.001089717	0.012144124	-0.81424817	chr3	+	179058109	179060100	Intergenic	Down
lnc-ZNF680-14	3.95808601	1.175515726	5.353649645	0.000363278	0.004804762	0.351653437	chr7	-	64139331	64147771	Antisense	Up
lnc-ZNF681-2	5.311696245	2.383177427	19.00218289	5.72E-09	5.51E-07	10.7154621	chr19	-	24101882	24141028	Antisense	Up
lnc-ZNF681-4	4.640285631	4.654333146	10.53495521	1.32E-06	3.93E-05	5.89889463	chr19	-	24231275	24246420	Antisense	Up
lnc-ZNF682-3	3.005490345	1.400951083	7.92295488	1.59E-05	0.000322476	3.52880683	chr19	-	20236185	20432114	Antisense	Up
lnc-ZNF687-1	7.628529903	3.271506608	21.32174727	1.93E-09	2.73E-07	11.48988973	chr1	+	151313123	151314442	Antisense	Up
lnc-ZNF701-2	8.227275397	5.288740064	14.26881872	8.31E-08	4.08E-06	8.478976594	chr19	+	53300916	53453256	Antisense	Up
lnc-ZNF710-1	6.21253185	1.235184771	12.29304462	3.27E-07	1.25E-05	7.242451278	chr15	+	90624693	90625438	Intergenic	Up
lnc-ZNF724P-2	-4.928252915	1.128618944	-5.164183142	0.000473578	0.006012594	0.042156564	chr19	-	23171058	23207156	Sense	Down
lnc-ZNF727-6	5.280554849	2.171052118	15.91101792	3.02E-08	1.89E-06	9.310986557	chr7	+	63361200	63385546	Intergenic	Up
lnc-ZNF732-4	3.787136843	1.564138223	5.202587446	0.000448611	0.005741347	0.127229685	chr4	-	248107	260058	Antisense	Up
lnc-ZNF738-5	7.263596517	3.570164413	19.96443951	3.59E-09	4.01E-07	11.13246511	chr19	+	21458356	21477566	Antisense	Up
lnc-ZNF740-2	6.163018077	2.689808935	15.89002085	3.06E-08	1.90E-06	9.383802275	chr12	+	53551572	53570194	Antisense	Up
lnc-ZNF775-1	6.304390493	2.699974998	22.87098777	9.91E-10	1.85E-07	12.06092307	chr7	+	150076417	150109558	Sense	Up
lnc-ZNF780B-1	5.635512511	2.677333387	17.10258135	1.54E-08	1.14E-06	9.961680074	chr19	-	40519720	40522954	Antisense	Up
lnc-ZNF788-1	3.996793	4.869499	3.72959	0.004161016	0.03664305	-2.190249	chr19	+	12203077	12248050	Sense	Up
lnc-ZNF790-1	5.077347195	1.960910898	11.41656489	6.40E-07	2.15E-05	6.659231023	chr19	-	37341778	37342418	Antisense	Up
lnc-ZNF791-10	6.26988791	1.305239398	8.45206577	9.13E-06	0.000199687	4.079674641	chr19	+	12500862	12542068	Antisense	Up
lnc-ZNF791-3	5.39217033	9.717844861	7.549398546	2.38E-05	0.000454297	3.104937748	chr19	+	12754404	12754799	Intergenic	Up
lnc-ZNF792-5	7.281098784	4.180418157	15.54449312	3.76E-08	2.20E-06	9.167870186	chr19	-	35434457	35435670	Antisense	Up
lnc-ZNF804B-1	-5.368738203	1.319303098	-6.237240951	0.000112687	0.001767091	1.547696163	chr7	+	88339944	88386039	Intergenic	Down
lnc-ZNF804B-2	-5.104761583	1.208607093	-6.867321867	5.21E-05	0.000897928	2.340299657	chr7	+	88983549	89126232	Intergenic	Down
lnc-ZNF814-1	3.043058251	5.239066258	4.66772359	0.000972179	0.011027261	-0.589185348	chr19	-	58377135	58400442	Sense	Up
lnc-ZNF823-2	4.809208781	2.342105892	7.594028348	2.27E-05	0.000438005	3.15766863	chr19	-	11906898	11909413	Antisense	Up
lnc-ZNF827-1	5.794973916	1.137469229	12.78157555	2.29E-07	9.34E-06	7.548018929	chr4	-	146563487	146571776	Antisense	Up
lnc-ZNF83-4	7.195818077	3.433592808	25.43107782	3.61E-10	1.08E-07	12.60777422	chr19	-	53079135	53088814	Antisense	Up
lnc-ZNF83-6	7.661143266	5.035056959	10.87647743	9.91E-07	3.10E-05	6.244011519	chr19	-	53057603	53064515	Antisense	Up
lnc-ZNF83-7	5.374222759	0.947718094	11.03386527	8.71E-07	2.77E-05	6.340691815	chr19	-	53014534	53015595	Antisense	Up
lnc-ZNF836-2	3.816866177	7.835965533	13.08016732	1.85E-07	7.88E-06	7.722521196	chr19	-	52725477	52734547	Intergenic	Up
lnc-ZNF841-2	6.296164896	2.736888734	16.03538818	2.81E-08	1.78E-06	9.457667512	chr19	-	52552062	52598991	Sense	Up
lnc-ZNF862-1	-3.708903543	1.086665013	-5.810123204	0.000195808	0.002837453	1.036581383	chr7	+	149473189	149524980	Sense	Down
lnc-ZSCAN2-5	4.786818743	4.712191781	5.039548091	0.000565402	0.006979243	-0.140816548	chr15	+	85175193	85186244	Sense	Up
lnc-ZSCAN2-6	4.512842995	1.449121448	11.14100668	7.98E-07	2.58E-05	6.450082714	chr15	+	85113790	85123412	Sense	Up
[truncated: 366 more rows]
