# Supplementary material for: LncRNAs induce oxidative stress and spermatogenesis by regulating endoplasmic reticulum genes and pathways
Source: Aging (Albany NY). 2021 May 6;13(10):13764–87. doi: 10.18632/aging.202971 (PMC8202879; doi:10.18632/aging.202971)
Supplement: Supplementary Table 4 [file aging-13-202971-s004.csv]

Supplementary Table 4. chromosome_mrna_condition.
entrezgene_id	chromosome_name	strand_name	start_position	end_position	difference
1	chr19	-	58856544	58864865	Down
9	chr8	+	18027986	18081198	Up
18	chr16	+	8768422	8878432	Up
20	chr9	-	139901686	139923367	Down
30	chr3	-	38144620	38178733	Up
31	chr17	-	35441923	35766909	Up
36	chr10	+	124768495	124817827	Up
38	chr11	+	107992243	108018503	Up
47	chr17	-	40023161	40086795	Up
50	chr22	+	41865129	41924993	Up
51	chr17	-	73937588	73975515	Up
55	chr3	+	132036211	132087142	Up
60	chr17	-	79476997	79490873	Up
81	chr19	+	39138289	39222223	Up
94	chr12	+	52300692	52317145	Down
101	chr10	-	135075907	135090372	Down
111	chr3	-	123001143	123168605	Down
112	chr12	-	49159975	49182820	Down
116	chr18	+	904944	912173	Down
120	chr10	+	111756126	111895323	Up
126	chr4	-	100257649	100274184	Down
136	chr17	+	15848231	15879060	Up
157	chr22	+	25960816	26125261	Up
176	chr15	+	89346674	89418585	Down
182	chr20	-	10618332	10654694	Down
202	chr6	+	106959730	107018326	Up
220	chr15	+	101417919	101456831	Up
224	chr17	+	19551449	19580911	Up
238	chr2	-	29415640	30144432	Down
239	chr17	+	6899384	6914055	Up
242	chr17	-	7975954	7991021	Up
257	chr1	-	110602616	110613322	Up
262	chr6	+	111195973	111216916	Up
269	chr12	+	53817639	53825318	Down
271	chr1	+	110158726	110174673	Down
273	chr7	-	38423305	38671167	Down
275	chr3	-	49454211	49460186	Up
287	chr4	+	113739265	114304896	Down
292	chrX	+	118602363	118605282	Up
301	chr9	+	75766673	75785309	Up
310	chr10	-	75134859	75173834	Up
320	chr9	-	72042446	72287222	Down
327	chr3	+	49711435	49721396	Up
329	chr11	+	102217942	102249401	Up
358	chr7	+	30893010	30965131	Down
367	chrX	+	66764465	66950461	Up
375	chr1	+	228270361	228286912	Up
382	chr14	+	50359810	50361490	Up
384	chr14	+	68086515	68118437	Up
387	chr3	-	49396578	49450431	Up
388	chr2	+	20646835	20649200	Up
389	chr1	-	113243728	113250056	Up
405	chr1	-	150782181	150849244	Up
411	chr5	-	78073032	78281910	Up
412	chrX	+	7137497	7272851	Up
435	chr7	+	65540785	65558545	Down
444	chr8	-	62413116	62627155	Down
479	chr13	+	25254549	25285921	Down
487	chr16	+	28889726	28915830	Up
488	chr12	+	110718561	110788898	Down
490	chr12	-	89981828	90103077	Down
498	chr18	-	43664110	43684300	Up
509	chr10	+	7830092	7849778	Up
522	chr21	-	27088815	27107984	Up
529	chr22	-	18074902	18111584	Up
558	chr19	+	41725108	41767671	Up
563	chr7	-	99564343	99573780	Up
573	chr9	-	33247818	33264761	Up
580	chr2	-	215590370	215674428	Up
595	chr11	+	69455855	69469242	Up
613	chr22	+	23521891	23660224	Down
631	chr20	-	17474550	17549865	Up
637	chr22	-	18216906	18257536	Up
652	chr14	-	54416454	54425479	Down
658	chr4	+	95679119	96079599	Up
664	chr10	-	133781578	133795435	Up
667	chr6	-	56322785	56819426	Down
673	chr7	-	140419127	140624564	Up
687	chr9	-	72999503	73029540	Up
689	chr5	+	72794233	72801460	Up
708	chr17	-	5336097	5352150	Up
738	chr11	+	64856796	64879332	Up
740	chr11	+	64889655	64894843	Up
745	chr11	+	61520114	61555990	Down
747	chr11	+	61447905	61514473	Down
753	chr18	+	13217497	13652754	Up
762	chr17	+	58227297	58248260	Down
774	chr9	+	140772241	141019076	Down
775	chr12	+	2079952	2802108	Down
777	chr1	+	181382238	181777219	Down
778	chrX	-	49061523	49089833	Down
794	chr16	+	71392616	71424341	Down
800	chr7	+	134429003	134655479	Up
801	chr19	+	47104331	47114050	Up
805	chr19	+	47104331	47114050	Up
811	chr19	+	13049392	13055303	Up
821	chr5	+	179105629	179157926	Up
823	chr11	+	64948037	64979477	Up
825	chr15	+	42640301	42704516	Down
826	chr19	+	36630477	36641255	Up
839	chr4	-	110609785	110624739	Up
871	chr11	+	75273101	75283828	Down
874	chr21	+	37507210	37518864	Up
885	chr3	-	42299317	42307699	Up
891	chr5	+	68462837	68474072	Down
899	chr16	+	2479395	2508855	Up
902	chr5	-	86687311	86708836	Up
923	chr11	+	60739115	60787849	Down
925	chr2	-	87011729	87035519	Down
926	chr2	+	107103824	107123396	Down
929	chr5	-	140011313	140013286	Up
939	chr12	+	6554033	6560884	Up
956	chr3	+	40428647	40470110	Up
957	chr14	-	74424713	74486102	Up
999	chr16	+	68771128	68869451	Down
1009	chr16	-	64977656	65160015	Down
1019	chr12	-	58141510	58149796	Up
1021	chr7	-	92234235	92465908	Up
1038	chrX	-	139865425	139866723	Up
1059	chr20	-	3764498	3767337	Up
1063	chr1	+	214776538	214837931	Down
1069	chrX	-	151995517	151999321	Up
1072	chr11	-	65590493	65629497	Up
1104	chr1	+	28832455	28865812	Down
1108	chr12	-	6679249	6716642	Up
1135	chr8	-	27317279	27337400	Down
1137	chr20	-	61975420	62009753	Down
1145	chr17	-	4801069	4806369	Up
1183	chrX	+	10125024	10205700	Down
1191	chr8	-	27454434	27472548	Up
1196	chr1	-	155232659	155248282	Down
1200	chr11	-	6634000	6640692	Down
1203	chr13	+	77564795	77576652	Up
1211	chr9	+	36190853	36304778	Up
1213	chr17	+	57697219	57773671	Up
1241	chr14	+	24780656	24787242	Down
1244	chr10	+	101542489	101611949	Down
1258	chr16	-	57917503	58005020	Down
1261	chr2	+	98962618	99015064	Down
1267	chr17	+	40118759	40129749	Up
1271	chr9	-	34551430	34590121	Down
1281	chr2	+	189839046	189877472	Down
1292	chr21	+	47518011	47552763	Down
1294	chr3	-	48601506	48632700	Down
1306	chr9	+	101705461	101833069	Down
1307	chr1	-	32117848	32169920	Down
1310	chr6	+	70576463	70919679	Down
1314	chr1	-	160259063	160313190	Up
1318	chr9	+	115913222	115926417	Up
1345	chr8	-	100885428	100906290	Up
1350	chr5	+	85913721	85916779	Up
1353	chr17	-	53029263	53046146	Up
1356	chr3	-	148880197	148939842	Up
1376	chr1	+	53662101	53679869	Up
1379	chr1	+	207818458	207911761	Down
1389	chr12	+	12764761	12798042	Up
1390	chr10	+	35415719	35501886	Down
1398	chr17	-	1323983	1366456	Up
1400	chr4	-	5749811	5894785	Up
1429	chr1	-	75171170	75199092	Up
1431	chr12	-	56665483	56694176	Up
1432	chr6	+	35995488	36079013	Up
1445	chr15	+	75074398	75095539	Up
1452	chr5	-	148872949	148884233	Up
1462	chr5	+	82767284	82878122	Down
1488	chr10	-	126676421	126849739	Up
1495	chr5	+	137946656	138270723	Up
1496	chr2	+	79412357	80875905	Down
1500	chr11	+	57520715	57587018	Up
1508	chr8	-	11700033	11726957	Up
1524	chr3	-	39304985	39323226	Down
1528	chr18	-	71920530	71959251	Up
1555	chr19	+	41497204	41524303	Down
1607	chr7	-	14184674	15014402	Down
1611	chr5	-	10679342	10761384	Up
1615	chr2	-	136664247	136743670	Up
1632	chr16	-	2289396	2302301	Up
1636	chr17	+	61554422	61599205	Down
1644	chr7	-	50526134	50633154	Down
1655	chr17	-	62495734	62504317	Up
1666	chr8	+	91013633	91064320	Up
1690	chr14	+	31343720	31364271	Down
1723	chr16	+	72042487	72058954	Down
1734	chr14	-	80663873	80854100	Down
1759	chr9	+	130965658	131017527	Down
1767	chr5	-	13690440	13944652	Down
1768	chr2	+	84743579	85046713	Down
1770	chr17	+	11501748	11873065	Down
1773	chr16	+	3661729	3730144	Up
1794	chr5	+	169064251	169510386	Down
1803	chr2	-	162848751	162931052	Up
1808	chr8	+	26371791	26515694	Down
1821	chrX	+	100474758	100519486	Down
1831	chrX	-	106956451	107020572	Up
1832	chr6	+	7541808	7586950	Up
1870	chr1	-	23832922	23857712	Down
1875	chr8	+	86089460	86129387	Up
1892	chr10	-	135175984	135187193	Up
1915	chr6	-	74225473	74233520	Up
1937	chr11	-	62327073	62342401	Up
1938	chr19	-	3976054	3985467	Up
1951	chr3	-	48673902	48700348	Down
1953	chr1	-	3406484	3528059	Down
1960	chr8	-	22545172	22550815	Up
1962	chr3	-	184908412	184999778	Up
1974	chr3	+	186500994	186507689	Up
1979	chr10	+	72164135	72188374	Up
1983	chr14	+	103799881	103811362	Up
1984	chr17	+	7210318	7215774	Up
1997	chr13	-	41506056	41635576	Up
1998	chr4	-	139949266	140098372	Up
2009	chr14	+	100204030	100408397	Down
2021	chr9	+	131580753	131584956	Up
2037	chr6	-	131160487	131384462	Down
2051	chr7	+	142552792	142568847	Down
2057	chr19	-	11488236	11495018	Up
2058	chr1	-	220141943	220220000	Up
2065	chr12	+	56473641	56497289	Up
2066	chr2	-	212240446	213403565	Down
2067	chr19	-	45910591	45982086	Up
2068	chr19	-	45853095	45874176	Down
2079	chr14	-	69846848	69865344	Up
2099	chr6	+	151977826	152450754	Down
2101	chr11	+	64073044	64084215	Up
2110	chr4	+	159593277	159630775	Up
2137	chr8	+	28457986	28613116	Down
2166	chr1	+	46859937	46879520	Down
2180	chr4	-	185676749	185747972	Up
2191	chr2	-	163027194	163101661	Up
2194	chr17	-	80036214	80056208	Up
2197	chr11	-	64888100	64889945	Up
2199	chr3	+	13573824	13679922	Down
2200	chr15	-	48700503	48938046	Down
2209	chr1	+	149754227	149764074	Up
2263	chr10	-	123237848	123357972	Down
2288	chr12	+	2904119	2914576	Up
2300	chr16	+	86609974	86615303	Down
2316	chrX	-	153576892	153603006	Down
2318	chr7	+	128470431	128499328	Down
2321	chr13	-	28874489	29069265	Down
2322	chr13	-	28577411	28674729	Down
2324	chr5	-	180028506	180076624	Down
2332	chrX	+	146993469	147032645	Up
2355	chr2	+	28615315	28640179	Up
2512	chr19	+	49468558	49470135	Up
2517	chr1	-	24171567	24194784	Up
2531	chr18	-	60994959	61034743	Down
2547	chr22	+	42017123	42060044	Up
2561	chr5	-	160715436	160976050	Down
2642	chr17	+	79762008	79771889	Down
2644	chr15	+	41056218	41059906	Up
2660	chr2	-	190920423	190927455	Down
2661	chr5	-	132196873	132202576	Up
2665	chr10	-	5807186	5884095	Up
2677	chr2	-	85771846	85788670	Up
2689	chr17	-	61957578	61959295	Down
2729	chr6	-	53362139	53481768	Up
2733	chr9	+	131266979	131304567	Up
2734	chr16	-	74481325	74483790	Up
2739	chr6	-	38643701	38670917	Up
2760	chr5	+	150591711	150650001	Down
2764	chr14	-	54941202	54955914	Up
2768	chr7	-	2767746	2883958	Up
2775	chr16	+	56225302	56391356	Down
2781	chr22	+	23412540	23467224	Down
2800	chr9	-	127640646	127710771	Up
2849	chr10	+	125425871	125454123	Down
2863	chr2	+	133174147	133404132	Up
2876	chr3	-	49394609	49396033	Up
2879	chr19	+	1103936	1106787	Up
2885	chr17	-	73314157	73401790	Up
2893	chr11	+	105480721	105852819	Down
2909	chr19	+	47421933	47508334	Up
2926	chr4	-	71681499	71705662	Up
2948	chr1	+	110198703	110208118	Down
2965	chr11	+	18343842	18388591	Up
2969	chr7	+	74071994	74175026	Up
2971	chr13	+	27998681	28009958	Up
2976	chr2	-	27548716	27579868	Up
2987	chr1	+	228327663	228336685	Up
3000	chr17	+	7905912	7923657	Up
3005	chr22	+	38201114	38203442	Up
3006	chr6	-	26055968	26056699	Up
3021	chr17	-	73772515	73781974	Up
3032	chr2	+	26466038	26513336	Up
3038	chr16	+	69139467	69152622	Up
3069	chr2	-	242166679	242256476	Up
3091	chr14	+	62162231	62214976	Up
3092	chr7	-	75162621	75368280	Down
3093	chr4	+	39699664	39784412	Up
3097	chr6	-	143072604	143266338	Up
3098	chr10	+	71029740	71161638	Up
3106	chr6	-	31321649	31324965	Up
3107	chr6	-	31236526	31239907	Up
3113	chr6	-	33032346	33048552	Up
3123	chr6	-	32546546	32557625	Down
3141	chr21	-	38123189	38362536	Up
3157	chr5	-	43289497	43313614	Up
3163	chr16	+	4524691	4560348	Up
3169	chr14	-	38059189	38069245	Up
3178	chrX	-	100110277	100111368	Up
3181	chr7	-	26229547	26241149	Up
3182	chr5	+	177631508	177638164	Up
3184	chr4	-	83273651	83295656	Up
3185	chr10	-	43881065	43904614	Up
3190	chr9	-	86582998	86595569	Up
3200	chr7	-	27145803	27192200	Up
3206	chr7	-	27210210	27219880	Up
3236	chr2	+	176973518	176984670	Up
3251	chrX	+	133594183	133654543	Up
3292	chr17	+	40701232	40707231	Up
3295	chr5	+	118788138	118972894	Up
3308	chr5	+	132387654	132442141	Up
3312	chr11	-	122928197	122933938	Up
3313	chr5	-	137890571	137911133	Up
3329	chr2	-	198351305	198381461	Up
3339	chr1	-	22148738	22263790	Down
3363	chr10	-	92500578	92617671	Down
3371	chr9	-	117782806	117880536	Down
3400	chr6	+	19837617	19840915	Up
3416	chr10	-	94211441	94333833	Up
3417	chr2	-	209100951	209130798	Up
3421	chrX	-	153051221	153059978	Up
3422	chr10	-	1085848	1095110	Up
3425	chr4	+	980785	998316	Down
3460	chr21	+	34775202	34851655	Up
3556	chr3	+	190231840	190375843	Down
3560	chr22	-	37521878	37571094	Down
3577	chr2	-	219027568	219031718	Down
3594	chr19	-	18169805	18209754	Down
3608	chr1	-	153634512	153643524	Up
3611	chr11	+	6624961	6632102	Up
3626	chr12	+	57828543	57844611	Down
3638	chr7	+	155089486	155101945	Up
3646	chr8	-	109213445	109447562	Up
3656	chr3	+	10206549	10285427	Down
3674	chr17	-	42449548	42466873	Down
3675	chr17	+	48133332	48167845	Down
3680	chr3	+	37493606	37865005	Up
3684	chr16	+	31271311	31344213	Down
3687	chr16	+	31366455	31394318	Down
3691	chr17	+	73717408	73753899	Down
3697	chr3	+	52811603	52826078	Down
3712	chr15	+	40697686	40728146	Up
3716	chr1	-	65298912	65432187	Up
3718	chr19	-	17935589	17958880	Down
3727	chr19	-	18390563	18392432	Up
3742	chr12	+	4918342	4960277	Down
3749	chr1	+	110753965	110825722	Down
3766	chr1	-	160007257	160040038	Down
3782	chr1	-	154669931	154842756	Down
3798	chr12	+	57943781	57980415	Down
3835	chr16	+	29802040	29816706	Up
3837	chr17	+	45726842	45762871	Up
3845	chr12	-	25357723	25403870	Up
3854	chr12	-	52840435	52845910	Down
3856	chr8	+	62490779	62492230	Up
3858	chr17	-	38974369	38978847	Up
3875	chr12	+	53342655	53346685	Up
3899	chr2	-	100162323	100759201	Up
3908	chr6	+	129204342	129837714	Down
3914	chr1	-	209788215	209825811	Down
3915	chr1	+	182992595	183114727	Up
3916	chr13	+	113951556	113977987	Down
3918	chr1	+	183155373	183214035	Down
3921	chr3	+	39448180	39454033	Up
3936	chr13	-	46700055	46786006	Up
3938	chr2	-	136545410	136594750	Down
3990	chr15	+	58702768	58861151	Down
3992	chr11	-	61567099	61596790	Up
4026	chr3	+	187871072	188608460	Up
4035	chr12	+	57522276	57607134	Down
4036	chr2	-	169983619	170219195	Down
4040	chr12	-	12268959	12419946	Down
4041	chr11	+	68080077	68216743	Down
4051	chr19	+	15751707	15773635	Down
4058	chr15	-	41795836	41806085	Down
4074	chr12	-	9092959	9102551	Up
4109	chrX	-	151301782	151307033	Down
4130	chr15	+	43803156	43823818	Down
4147	chr8	+	98881068	99048944	Down
4149	chr14	-	65472892	65569413	Up
4150	chr16	+	29817427	29823649	Up
4154	chr3	+	151961617	152183569	Up
4166	chr16	-	75510949	75529282	Down
4168	chrX	-	138663929	138790386	Down
4170	chr1	-	150547032	150552066	Up
4176	chr7	-	99690351	99699563	Up
4185	chr17	+	42836399	42859214	Down
4200	chr18	+	48405419	48474691	Up
4201	chr6	-	42979832	42981706	Up
4210	chr16	-	3292028	3306627	Down
4214	chr5	+	56111401	56191979	Down
4236	chr15	-	44096690	44117000	Up
4259	chr1	+	165600098	165631033	Up
4285	chr13	-	24304328	24463558	Up
4288	chr10	-	129894923	129924649	Down
4289	chr7	+	130794855	131181395	Up
4291	chr3	+	158288952	158325041	Down
4301	chr6	+	168227602	168372703	Up
4308	chr15	-	31293264	31453476	Down
4318	chr20	+	44637547	44645200	Down
4324	chr16	+	58059470	58080805	Down
4326	chr12	+	132312938	132336328	Down
4327	chr12	-	56229217	56236750	Up
4329	chr14	-	74523553	74551196	Up
4336	chr3	+	39508689	39570970	Down
4350	chr16	+	127006	135852	Up
4534	chrX	+	149737069	149841795	Up
4548	chr1	+	236958610	237067281	Up
4580	chr1	+	155178490	155183615	Up
4583	chr11	+	1074875	1104419	Down
4594	chr6	-	49398073	49430904	Up
4595	chr1	-	45794835	45806142	Up
4601	chr10	+	111967363	112047123	Up
4622	chr17	-	10346607	10372876	Down
4624	chr14	-	23851199	23877486	Down
4629	chr16	-	15797029	15950890	Up
4637	chr12	+	56551945	56557280	Up
4647	chr11	+	76839310	76926284	Down
4651	chr5	-	16665395	16936372	Down
4660	chr1	+	202317827	202561834	Up
4669	chr17	+	40688190	40696467	Down
4676	chr11	-	2965667	3013607	Up
4677	chr18	-	55267888	55289445	Up
4688	chr1	-	183524698	183560011	Down
4691	chr2	-	232318242	232348352	Up
4692	chr15	-	23930565	23932450	Down
4694	chrX	+	119005450	119010625	Up
4697	chr7	-	10971578	10979883	Up
4700	chr22	-	42481529	42486959	Up
4714	chr10	-	102265385	102289638	Up
4716	chr16	+	2009509	2011976	Up
4717	chr4	-	140188034	140223705	Up
4724	chr5	+	52856463	52979168	Up
4725	chr1	+	39491990	39500308	Up
4735	chr2	+	242254515	242293442	Up
4736	chr6	+	35436185	35438562	Up
4778	chr12	-	54685895	54694905	Down
4779	chr17	+	46125691	46138849	Down
4784	chr19	+	13106422	13209610	Up
4790	chr4	+	103422486	103538459	Up
4817	chr1	+	161087876	161095235	Up
4824	chr8	-	23536206	23540440	Up
4826	chr20	+	36149617	36152092	Up
4833	chr16	+	446725	460367	Up
4843	chr17	-	26083792	26127525	Down
4848	chr12	+	70636774	70748773	Up
4851	chr9	-	139388896	139440314	Down
4854	chr19	-	15270444	15311792	Down
4860	chr14	+	20937113	20945253	Up
4883	chr5	+	32689176	32791819	Up
4900	chr11	+	124609742	124617106	Up
4905	chr17	+	44668035	44834830	Up
4907	chr6	+	86159809	86205500	Up
4915	chr9	+	87283466	87638505	Down
4926	chr11	-	71713910	71791739	Up
4929	chr2	-	157180944	157198860	Down
4943	chrX	+	48397845	48420997	Down
4953	chr2	-	10580094	10588630	Up
4968	chr3	+	9791628	9829903	Up
5001	chr7	-	103766788	103848495	Down
5003	chr11	-	2909010	2924970	Up
5028	chr3	+	152552736	152555841	Up
5037	chr12	+	118573663	118583389	Up
5046	chr15	-	101840818	102065405	Down
5048	chr17	+	2496504	2588909	Up
5049	chr11	+	117014983	117047610	Up
5052	chr1	-	45976708	45988719	Up
5054	chr7	+	100770370	100782547	Down
5079	chr9	-	36833272	37034103	Down
5080	chr11	-	31806340	31839509	Up
5087	chr1	+	164524821	164868533	Up
5092	chr10	-	72642037	72648541	Up
5093	chr2	+	70314585	70316332	Up
5094	chr12	+	53835525	53874946	Up
5095	chr13	+	100741269	101182686	Up
5097	chr5	-	141232938	141258811	Down
5099	chr4	+	30722037	31148422	Down
5116	chr21	+	47744036	47865682	Down
5130	chr3	-	195941093	196014828	Up
5162	chr3	-	58413357	58419584	Up
5178	chr19	-	57285920	57352097	Up
5189	chr7	-	92116334	92157845	Up
5190	chr6	-	42931608	42946958	Up
5195	chr1	+	10532345	10690815	Down
5204	chr12	+	53689075	53693234	Up
5217	chr3	-	149682691	149768575	Up
5224	chr7	-	44102326	44105186	Up
5230	chrX	+	77320685	77384793	Up
5238	chr6	-	83870869	83903655	Up
5250	chr12	+	98987369	98995946	Up
5251	chrX	+	22050559	22269427	Down
5272	chr6	-	2887500	2903514	Down
5281	chr2	-	46808076	46844258	Up
5283	chr14	-	68048672	68067004	Up
5289	chr18	+	39535171	39667794	Up
5325	chr6	-	144261437	144385735	Down
5331	chr11	+	64018995	64036622	Down
5336	chr16	+	81772702	81991899	Down
5340	chr6	+	161123270	161174347	Down
5352	chr3	-	145787227	145881440	Down
5361	chr3	+	126707437	126756235	Down
5379	chr7	-	100320640	100336307	Up
5393	chr4	+	122722472	122738176	Up
5411	chr14	+	39644387	39652422	Up
5412	chr13	-	30338508	30424821	Up
5432	chr16	+	57496299	57505922	Up
5434	chr19	-	1086594	1095598	Up
5440	chr8	+	101162812	101166230	Up
5452	chr19	-	42590263	42700737	Down
5467	chr6	+	35310335	35395968	Down
5479	chr15	-	64448011	64455404	Up
5481	chr4	-	159630286	159644548	Up
5494	chr14	+	60712470	60765805	Up
5500	chr2	+	28974506	29025806	Up
5501	chr12	-	111157485	111180744	Up
5511	chr1	+	28157289	28178187	Up
5515	chr5	-	133530025	133561833	Up
5518	chr19	+	52693292	52730687	Up
5519	chr11	-	111597632	111637151	Up
5528	chr6	+	42952237	42980080	Up
5530	chr4	-	101944566	102269435	Up
5532	chr10	-	75196186	75255782	Up
5535	chr9	-	104353897	104357283	Down
5537	chr9	-	127908852	127952218	Up
5549	chr1	+	203444956	203460480	Down
5569	chr8	+	79428374	79517502	Up
5570	chr6	+	122793076	123047518	Down
5573	chr17	+	66507921	66547460	Up
5577	chr7	+	106685094	106802256	Up
5578	chr17	+	64298754	64806861	Up
5582	chr19	+	54382444	54410906	Down
5583	chr14	+	61654277	62017694	Up
5584	chr3	+	169940153	170023769	Up
5599	chr10	+	49514698	49647403	Down
5601	chr5	-	179660143	179719099	Up
5603	chr6	+	36095586	36107842	Down
5604	chr15	+	66679155	66784650	Up
5611	chr13	+	96329393	96447243	Down
5620	chr16	-	11369496	11370337	Up
5648	chr3	-	186935942	187009810	Down
5651	chr21	-	19641433	19858197	Down
5684	chr14	+	58711549	58738730	Up
5685	chr15	+	78832747	78841604	Up
5687	chr14	+	35591755	35786680	Up
5689	chr6	-	170844205	170862429	Up
5692	chr1	+	151372010	151374420	Up
5695	chr9	-	127115745	127177723	Up
5705	chr17	+	61904512	61909379	Up
5707	chr2	+	231921578	232037541	Up
5708	chr3	+	184016497	184026842	Up
5711	chr9	-	123577774	123605262	Up
5714	chr19	+	38865176	38874464	Up
5718	chr17	-	65334032	65362743	Up
5721	chr14	-	24612574	24616779	Up
5733	chr1	-	71318036	71513491	Down
5744	chr12	-	28111017	28125638	Down
5747	chr8	-	141667999	142012315	Up
5753	chr20	-	62159778	62168723	Down
5763	chr12	+	6874682	6880116	Up
5780	chr15	-	75759462	75871630	Up
5788	chr1	+	198607801	198726545	Down
5789	chr9	-	8314246	10612723	Down
5795	chr11	+	48002113	48189670	Up
5803	chr7	+	121513143	121702090	Down
5805	chr11	+	112097088	112140678	Up
5818	chr11	-	119494120	119599794	Down
5832	chr10	-	97365696	97416463	Up
5837	chr11	-	64513861	64527769	Down
5869	chr12	+	56367697	56388490	Up
5870	chr11	-	73386683	73472182	Up
5883	chr11	+	67159176	67165881	Up
5885	chr8	-	117858174	117887105	Up
5894	chr3	-	12625100	12705725	Up
5899	chr2	+	120997640	121052289	Up
5901	chr12	+	131356424	131362223	Up
5902	chr22	+	20103461	20114878	Up
5908	chr12	+	69004619	69054372	Up
5913	chr11	-	47459308	47470730	Down
5918	chr3	-	158414681	158450485	Up
5924	chr5	+	80256491	80525975	Down
5928	chr1	+	33116743	33151812	Up
5930	chr16	+	24549014	24584184	Up
5934	chr16	+	53467889	53525561	Up
5976	chr19	+	18942747	18979045	Up
5985	chr12	+	118451393	118470935	Up
5988	chr22	+	29834572	29838444	Up
5992	chr12	+	106976685	107156581	Down
5998	chr9	+	116207011	116360018	Down
6017	chr15	-	89753100	89764982	Up
6051	chr1	+	201951500	201975275	Up
6092	chr3	+	75955846	77699115	Down
6098	chr6	-	117609463	117747018	Down
6102	chrX	+	46696375	46741793	Up
6103	chrX	-	38128416	38186817	Up
6121	chr1	-	68894505	68915642	Down
6124	chr15	-	66790355	66816870	Up
6125	chr1	+	93297582	93307481	Up
6128	chr12	-	112842994	112856642	Up
6130	chr9	+	136215069	136218281	Up
6132	chr8	-	146015150	146017972	Up
6134	chrX	+	153618315	153637504	Up
6136	chr9	-	130209953	130213684	Up
6137	chr16	+	89627065	89630950	Up
6138	chr3	+	23958036	23965183	Up
6139	chr18	-	47008051	47017956	Up
6143	chr17	+	37356536	37360980	Up
6147	chr17	+	27046411	27051377	Up
6152	chr3	-	101399935	101405626	Up
6154	chr17	-	8280838	8286531	Up
6155	chr17	+	41150290	41154976	Up
6157	chr11	+	8703958	8736306	Up
6159	chr3	-	52027616	52029958	Up
6164	chr4	+	109541722	109551568	Up
6165	chr3	+	197676858	197683481	Up
6167	chr5	-	40825364	40835437	Up
6168	chr2	+	217362912	217443903	Up
6169	chr17	+	72199721	72206794	Up
6170	chrX	-	118920467	118925606	Up
6171	chr12	+	56510370	56511727	Up
6175	chr12	-	120634489	120639038	Up
6181	chr11	+	809647	812880	Up
6187	chr16	-	2012053	2014861	Up
6188	chr11	+	75110530	75133324	Up
6189	chr15	+	60060543	60061347	Up
6191	chrX	-	71475529	71497150	Up
6192	chrY	+	2709527	2800041	Up
6194	chr9	-	19375713	19380252	Up
6197	chrX	-	20168029	20285523	Up
6201	chr2	+	3622795	3628509	Up
6202	chr1	+	45240923	45244451	Up
6205	chr19	+	49999622	50002946	Up
6207	chr11	-	17095936	17099334	Up
6208	chr5	-	149822753	149829319	Up
6209	chr19	+	1438358	1440583	Up
6210	chr16	-	18792617	18801705	Up
6218	chr15	-	82821158	82824972	Up
6224	chr8	-	56979854	56987069	Up
6228	chr5	-	81569177	81574396	Up
6233	chr2	+	55459039	55462989	Up
6234	chr19	+	8386042	8388224	Up
6240	chr11	+	4115937	4160106	Up
6259	chr3	-	133784147	133969689	Up
6261	chr19	+	38924339	39078204	Down
6262	chr1	+	237205505	237997288	Down
6263	chr15	+	33603163	34158303	Down
6271	chr1	+	153600402	153604513	Up
6299	chr16	-	51169886	51185278	Down
6302	chr12	+	58131796	58143994	Up
6323	chr2	-	166845670	166984523	Down
6327	chr11	-	118032666	118047388	Down
6331	chr3	-	38589548	38691164	Down
6332	chr2	-	167260083	167350757	Down
6342	chr1	+	53392901	53517375	Up
6345	chr16	-	4239375	4292081	Down
6386	chr8	+	59465483	59495419	Up
6389	chr5	+	218356	256815	Up
6392	chr11	+	111957497	111990353	Up
6397	chr17	+	75082798	75213179	Up
6406	chr20	+	43835638	43838413	Up
6426	chr17	-	56080721	56084707	Up
6427	chr17	-	74730197	74733456	Up
6431	chr20	+	42086568	42092245	Up
6432	chr2	-	38970741	38978636	Up
6433	chr12	+	132195626	132284282	Up
6442	chr17	+	48241575	48253292	Down
6464	chr1	-	154934774	154946871	Up
6500	chr5	-	133484633	133512729	Up
6506	chr11	-	35272753	35441610	Down
6507	chr5	+	36606457	36688436	Down
6508	chr2	+	220492049	220506702	Down
6513	chr1	-	43391052	43424530	Down
6517	chr17	+	7184986	7191576	Down
6519	chr2	+	44502599	44548633	Up
6523	chr22	+	32439019	32509016	Down
6527	chr22	-	32614465	32651328	Up
6533	chr3	+	14444076	14530857	Down
6559	chr16	+	56899119	56949762	Down
6569	chr5	+	176806236	176825849	Down
6571	chr10	+	119000604	119038941	Up
6575	chr8	-	42273993	42397069	Up
6579	chr12	-	21417534	21572528	Down
6584	chr5	+	131705444	131731306	Down
6586	chr5	-	168088745	168728133	Down
6590	chr20	-	43880880	43883205	Down
6597	chr19	+	11071598	11176071	Up
6611	chrX	+	21958691	22025798	Up
6624	chr7	+	5632439	5646286	Down
6628	chr20	-	2442280	2451499	Up
6632	chr18	+	19192228	19210417	Up
6633	chr19	-	46190712	46195827	Up
6636	chr12	+	96252706	96297606	Up
6637	chr2	-	70508494	70520903	Up
6647	chr21	+	33031935	33041244	Up
6648	chr6	-	160090089	160183561	Up
6652	chr15	+	45315302	45369383	Up
6667	chr12	+	53773960	53810230	Up
6677	chr7	+	123565286	123611468	Down
6692	chr15	+	41136216	41150405	Up
6697	chr2	+	73114489	73119287	Up
6708	chr1	-	158580496	158656488	Down
6714	chr20	+	35973088	36034453	Up
6715	chr5	+	6633456	6669675	Up
6720	chr17	-	17713713	17740325	Down
6726	chr1	+	225965531	225978168	Up
6728	chr5	+	112196919	112205485	Up
6738	chr1	+	193028552	193060907	Up
6741	chr2	+	170648443	170668574	Up
6767	chr22	-	41220539	41253026	Up
6769	chr3	+	36421836	36589499	Down
6772	chr2	-	191829084	191885686	Up
6774	chr17	-	40465342	40540586	Up
6780	chr20	-	47729878	47804904	Up
6820	chr19	+	49055332	49102682	Up
6827	chr17	-	56422539	56430454	Up
6833	chr11	-	17414432	17498449	Down
6862	chr6	-	166571144	166582188	Down
6867	chr8	+	38585704	38710546	Up
6871	chr17	+	35766965	35839835	Down
6881	chr11	-	6627526	6633898	Up
6900	chr1	+	205012325	205047627	Down
6901	chrX	+	153639854	153650065	Up
6909	chr17	+	59477257	59486827	Up
6917	chr8	-	54879112	54935089	Up
6926	chr12	-	115108059	115121969	Up
6927	chr12	+	121416346	121440315	Up
6929	chr19	-	1609291	1652604	Down
6948	chr22	+	31002825	31023265	Down
6950	chr6	-	160199530	160210781	Up
6954	chr6	-	35085848	35116387	Up
6988	chr3	+	49449639	49453908	Up
6990	chrX	-	37696010	37706890	Up
6991	chr6	-	170140210	170151655	Down
7007	chr11	+	120971882	121062202	Down
7010	chr9	+	27109139	27230173	Down
7015	chr5	-	1253262	1295184	Down
7020	chr6	-	10393419	10419892	Up
7045	chr5	+	135364584	135399507	Down
7047	chr3	+	44916100	44956482	Up
7049	chr1	-	92145902	92371892	Down
7052	chr20	-	36756863	36794980	Down
7053	chr20	+	2276647	2321724	Down
7058	chr6	-	169615875	169654139	Down
7095	chr3	+	169684423	169716161	Up
7111	chr9	+	100263462	100364030	Up
7113	chr21	-	42836478	42903043	Up
7126	chr17	+	26662628	26674035	Up
7127	chr14	+	103589779	103603776	Down
7128	chr6	+	138188351	138204449	Down
7132	chr12	-	6437923	6451280	Down
7135	chr1	-	201373625	201398994	Up
7143	chr1	-	175284330	175712906	Down
7167	chr12	+	6976283	6980112	Up
7170	chr1	-	154127784	154167124	Up
7171	chr19	+	16177831	16213813	Up
7178	chr13	-	45911008	45915505	Up
7180	chr6	-	49660073	49681274	Up
7200	chr3	+	129693148	129696781	Down
7226	chr21	+	45770046	45862964	Down
7259	chr6	-	116597741	116601066	Up
7277	chr2	-	220114433	220142892	Up
7288	chr19	-	49384222	49401990	Down
7290	chr22	-	19318221	19435224	Up
7297	chr19	-	10461209	10491352	Down
7298	chr18	+	657604	673578	Up
7301	chr15	+	41849873	41871536	Down
7314	chr17	+	16284112	16286059	Up
7316	chr12	-	125396150	125401914	Up
7323	chr4	-	103715540	103790053	Up
7324	chr3	+	23847394	23932807	Up
7327	chr21	-	46188955	46221934	Up
7334	chr12	-	93799449	93836038	Up
7341	chr2	-	203070903	203103331	Up
7342	chr3	-	33429828	33482863	Up
7358	chr4	-	39500375	39529931	Up
7386	chr19	-	29698173	29704448	Up
7390	chr10	-	127477146	127511817	Up
7399	chr1	-	215796236	216596738	Down
7402	chr6	+	144606837	145174170	Up
7404	chrY	-	15360259	15592553	Up
7416	chrX	+	80184999	80185846	Up
7429	chr2	+	219283815	219318018	Down
7430	chr6	-	159186773	159240444	Up
7431	chr10	+	17270258	17279592	Up
7442	chr17	-	3468738	3539543	Down
7450	chr12	-	6058040	6233936	Down
7456	chr2	-	175424300	175547644	Down
7462	chr7	+	73613982	73644161	Up
7494	chr22	-	29190543	29196585	Up
7498	chr2	-	31557187	31637581	Down
7517	chr14	-	104163946	104181841	Down
7528	chr14	+	100704635	100749129	Up
7529	chr20	+	43514317	43537173	Up
7534	chr8	-	101928753	101965616	Up
7544	chrY	+	2803112	2850547	Up
7549	chr2	+	95831177	95850065	Up
7551	chr7	-	99661656	99680171	Up
7555	chr3	-	128888327	128902765	Up
7561	chr19	-	19821280	19843906	Up
7580	chr10	-	44139307	44144304	Up
7582	chr10	-	43084555	43133992	Up
7589	chr7	+	99647390	99662661	Up
7678	chr1	-	247285277	247335318	Up
7691	chr19	-	58944181	58951589	Up
7701	chr2	-	219502639	219524378	Up
7704	chr11	+	113930315	114121398	Up
7705	chr19	+	36705504	36729676	Up
7718	chr6	+	28048753	28057341	Up
7727	chr16	+	3451235	3459370	Down
7763	chr9	-	74966341	74980163	Up
7767	chr19	+	44598492	44612479	Up
7782	chr15	-	45771809	45815005	Up
7799	chr1	+	14026693	14151574	Up
7879	chr3	+	128444965	128533639	Up
7881	chr3	+	155755490	156256545	Up
7913	chr6	-	18224099	18265054	Up
7942	chr6	-	41651716	41703997	Down
7965	chr7	+	6048876	6063465	Up
7976	chr8	+	28351729	28431775	Down
7994	chr8	-	41786997	41909508	Up
8019	chr9	-	136895427	136933657	Up
8030	chr10	-	61548521	61666414	Up
8031	chr10	+	51565108	51590734	Up
8073	chr1	-	32372022	32410457	Up
8125	chr15	-	69070874	69113236	Up
8178	chr19	-	18553473	18632937	Down
8189	chr19	-	46318668	46366548	Down
8192	chr19	+	6361463	6368919	Up
8226	chrX	-	6966961	7066231	Up
8284	chrY	-	21865751	21906825	Up
8291	chr2	+	71680852	71913898	Down
8338	chr1	+	149858525	149858961	Up
8367	chr1	+	149804221	149811339	Up
8402	chr17	-	4840425	4843546	Up
8405	chr17	-	47676246	47755596	Up
8408	chr12	+	132379196	132407712	Up
8409	chrX	-	47511197	47518560	Up
8416	chr1	+	150954493	150968110	Up
8448	chr16	-	30016830	30034591	Up
8450	chrX	-	119658464	119709649	Up
8455	chr20	+	3451687	3631769	Down
8464	chr6	-	44777054	45345690	Up
8467	chr4	+	144434616	144478639	Up
8490	chr1	-	163214295	163291684	Down
8502	chr2	+	159313476	159539391	Up
8508	chr22	-	29950797	29977326	Up
8516	chr10	-	15555948	15762124	Down
8545	chr3	-	88101094	88199035	Up
8562	chr12	+	123237321	123255611	Up
8575	chr2	-	179296141	179316239	Up
8605	chr19	-	48551100	48614074	Up
8625	chr19	+	19303008	19312678	Up
8633	chr4	-	96083655	96470357	Down
8646	chr3	+	184097861	184108524	Down
8647	chr2	-	169779448	169887832	Down
8653	chrY	+	15016019	15032390	Up
8660	chr13	-	110406184	110438915	Up
8661	chr10	-	120794356	120840316	Up
8664	chr22	-	36906897	36925483	Up
8665	chr11	+	7991798	8023409	Up
8668	chr1	+	32687529	32697205	Up
8674	chr1	-	171669300	171711387	Up
8682	chr1	+	160175127	160185166	Up
8683	chr12	-	120899471	120907596	Up
8692	chr3	-	50355221	50360337	Down
8694	chr8	-	145539954	145550573	Up
8703	chr1	-	161141100	161147287	Up
8714	chr17	+	48712138	48769613	Down
8725	chr19	+	30414551	30506611	Up
8728	chr5	-	156822542	157002783	Down
8736	chr18	-	3066805	3220106	Down
8761	chr1	-	40026488	40042462	Up
8766	chr15	+	66018392	66184329	Up
8774	chr18	+	10525902	10552758	Up
8793	chr8	-	22993101	23021543	Down
8797	chr8	-	23047965	23082639	Down
8800	chr15	-	90220995	90234014	Up
8812	chr14	+	99947506	100001381	Up
8813	chr20	-	49551404	49575092	Up
8815	chr11	+	65769550	65771620	Up
8828	chr2	+	206546714	206662857	Down
8831	chr6	+	33387847	33421466	Down
8832	chr1	-	160510885	160549306	Down
8835	chr12	+	93963590	93977263	Up
8848	chr13	-	45007655	45151283	Up
8850	chr3	+	20081515	20195896	Up
8852	chrX	-	49955406	49965664	Up
8861	chr10	-	103867317	103880210	Down
8872	chr10	+	12237964	12292588	Up
8878	chr5	+	179233388	179265078	Up
8886	chr2	+	118572226	118589955	Up
8888	chr21	-	47655047	47706211	Up
8891	chr1	-	45316450	45452282	Up
8896	chr7	+	99006264	99017239	Up
8911	chr22	+	39966758	40085742	Down
8913	chr17	+	48638429	48704835	Down
8932	chr18	-	51679079	51751158	Up
8936	chr6	-	110421022	110501207	Down
8971	chr3	-	129033615	129035120	Up
8976	chr7	-	123321989	123389121	Up
8997	chr3	+	123798870	124445172	Down
9045	chr3	+	40498783	40503861	Up
9057	chr16	+	68298433	68335722	Up
9061	chr4	-	108511433	108641608	Up
9070	chr8	+	37962760	38001594	Up
9088	chr16	-	3018025	3030540	Up
9097	chr18	+	158383	214629	Up
9135	chr17	+	5185558	5289129	Up
9146	chr17	+	79650356	79670168	Up
9153	chr15	+	45544428	45568149	Down
9162	chr7	-	137065783	137531838	Down
9167	chr2	-	42560686	42652228	Up
9191	chr1	-	161090764	161102478	Up
9194	chr12	+	59989848	60176395	Down
9201	chr13	-	36345478	36705443	Down
9202	chr1	+	35734568	35887659	Up
9214	chr1	-	207077731	207096592	Down
9217	chr20	+	56964178	57026157	Up
9219	chr11	-	62360686	62369312	Up
9221	chr10	+	103911933	103923627	Up
9223	chr3	-	65339200	66024509	Up
9230	chr19	+	8454865	8469318	Up
9254	chr3	-	50400233	50541675	Up
9255	chr4	+	107236701	107270383	Up
9263	chr7	+	43622357	43666385	Up
9266	chr19	+	48972289	48985571	Down
9274	chr16	-	30844947	30906281	Down
9295	chr1	+	70671365	70718735	Up
9319	chr5	+	892758	919472	Down
9320	chr2	-	230628554	230787955	Up
9321	chr14	-	92432335	92507240	Up
9322	chr19	+	6737936	6751537	Up
9326	chr17	+	34842473	34855154	Up
9341	chr1	+	7831329	7841492	Up
9343	chr17	-	42927311	42977030	Up
9349	chr17	-	37004118	37010096	Up
9352	chr18	-	54264439	54318831	Up
9358	chr13	+	102104966	102375456	Down
9373	chr9	-	26904081	26947461	Up
9382	chr17	+	71189129	71204646	Up
9403	chr1	-	87328132	87380107	Up
9414	chr9	+	71736209	71870124	Down
9415	chr11	+	61560452	61634826	Up
9419	chr2	+	46843555	46852881	Up
9465	chr6	+	131456806	131604675	Up
9470	chr2	+	233414762	233448354	Up
9488	chr15	+	55611158	55647846	Up
9498	chr12	+	51785101	51902980	Down
9508	chr4	-	73146686	73434516	Down
9512	chr7	+	102937869	102969958	Up
9521	chr6	-	8073593	8102811	Up
9527	chr17	+	28804380	28854610	Up
9528	chr1	-	54497347	54519177	Up
9543	chr15	-	65619465	65670378	Down
9552	chr17	-	4862521	4871167	Up
9563	chr1	+	9294834	9331396	Down
9575	chr4	-	56294070	56413305	Up
9583	chr8	-	23243296	23315208	Down
9584	chr20	-	34291531	34330234	Up
9586	chr7	+	28338940	28865511	Down
9588	chr1	+	173446405	173457946	Up
9589	chr6	+	160146617	160177351	Up
9590	chr6	+	151561134	151679692	Up
9643	chrX	-	102930424	102943086	Up
9658	chr18	-	74069644	74207146	Down
9689	chr2	+	201675317	201688569	Up
9690	chr7	+	156931607	157062066	Up
9692	chr14	+	35591052	35743271	Up
9699	chr8	+	104512976	105268322	Up
9715	chr7	-	143050493	143059863	Down
9722	chr1	+	162039564	162353321	Down
9725	chr1	-	226033237	226070069	Down
9728	chr15	-	49280673	49338760	Up
9730	chr3	-	51433298	51534010	Up
9744	chr17	+	7239848	7254797	Up
9746	chr12	+	7282294	7311541	Down
9754	chrX	+	67867508	67945684	Down
9758	chrX	+	12156585	12742642	Down
9761	chr12	+	121124672	121139667	Up
9764	chr16	+	85061375	85127836	Down
9765	chr5	+	79703832	79775169	Up
9771	chr7	-	22157856	22396763	Down
9772	chr17	+	73437240	73496171	Up
9778	chr4	+	6783102	6885897	Up
9779	chr3	-	17198654	18486309	Up
9784	chr2	+	27593389	27599995	Up
9802	chr12	+	51632076	51665146	Up
9804	chr1	-	235272651	235292251	Up
9824	chr15	+	32907345	32932150	Down
9826	chr1	-	156904632	157015162	Down
9836	chr15	-	43619974	43622803	Up
9859	chr1	-	243287730	243418650	Down
9867	chr5	-	108670410	108745695	Up
9878	chr14	+	21944756	21967319	Up
9884	chr17	+	44370099	44415160	Up
9889	chr22	+	50247490	50283726	Up
9899	chr15	+	91643180	91844539	Up
9908	chr4	-	76567966	76649709	Up
9922	chr3	-	12938719	13114617	Down
9945	chr5	-	179727690	179780387	Down
9948	chr4	-	10075963	10118573	Up
9960	chr15	+	63796793	63886839	Up
9961	chr16	+	29831715	29859355	Down
10000	chr1	-	243651535	244014381	Up
10002	chr15	+	71810554	71818253	Down
10005	chr20	-	44470360	44486045	Up
10007	chr5	-	141371314	141392606	Up
10015	chr3	+	33839844	33911194	Up
10016	chr5	+	271736	353971	Up
10018	chr2	+	111876955	111926024	Up
10040	chr17	+	52976748	53039310	Up
10043	chr22	+	35695268	35743985	Down
10044	chr9	-	130500596	130541020	Down
10055	chr19	+	47616531	47713886	Up
10057	chr3	-	183637722	183735803	Down
10069	chr21	-	30376705	30391699	Up
10071	chr7	+	100612904	100662230	Down
10083	chr11	-	17515442	17565963	Down
10087	chr5	-	74664311	74807963	Up
10093	chr3	+	9834179	9849410	Up
10121	chr10	-	104238986	104262482	Up
10128	chr2	-	44113647	44223144	Up
10135	chr7	-	105888731	105926772	Up
10137	chr20	-	34236847	34252878	Up
10140	chr17	-	48939584	48945339	Up
10146	chr5	+	151150606	151192346	Up
10153	chr2	-	37428755	37458856	Up
10158	chr1	-	47649265	47656716	Down
10169	chr15	+	44069285	44094787	Up
10188	chr3	-	195590235	195638816	Up
10196	chr11	+	20409076	20530840	Up
10198	chr12	-	123636867	123728561	Up
10206	chr13	+	50570024	50594617	Up
10209	chr17	+	39845137	39848920	Up
10210	chr9	-	32540542	32552551	Up
10216	chr1	+	186265405	186283694	Up
10220	chr12	+	56137064	56150911	Up
10229	chr16	+	19078921	19091417	Up
10235	chr11	-	64494383	64512928	Down
10239	chr15	-	90373831	90437574	Up
10241	chr17	+	46908350	46943884	Up
10243	chr14	+	66974125	67648520	Up
10245	chrX	-	48750730	48755426	Up
10263	chr11	-	67273968	67276120	Down
10270	chr19	-	15464196	15490609	Up
10273	chr16	+	730224	732870	Up
10282	chr7	-	93592074	93633694	Up
10284	chr13	+	21714653	21723221	Up
10286	chr1	-	115110178	115124260	Up
10298	chr19	+	39616410	39673456	Up
10300	chr16	+	57769642	57791162	Down
10302	chr15	-	66782473	66790151	Up
10336	chr4	+	699537	764428	Up
10345	chr6	-	123537483	123958238	Down
10351	chr17	-	66863433	66951533	Down
10362	chr19	+	3572775	3579086	Up
10379	chr14	+	24620427	24636611	Up
10383	chr9	+	140135665	140138159	Up
10390	chr1	+	111682249	111727724	Up
10391	chr15	+	68871308	69020145	Down
10393	chr4	-	145888264	146019693	Up
10397	chr8	-	134249414	134314265	Up
10399	chr5	-	180663909	180675096	Up
10403	chr18	+	2571510	2616634	Down
10411	chr12	-	48128455	48164823	Up
10412	chr5	+	74062817	74072737	Up
10418	chr11	+	13983914	14289646	Down
10422	chr9	-	138824815	138853226	Down
10434	chr8	-	54958938	55014577	Up
10436	chr12	+	6970913	6997428	Up
10440	chr1	+	201924619	201939789	Up
10451	chr1	-	108113782	108507766	Down
10455	chr6	-	4115923	4135831	Up
10456	chr1	+	154244987	154248351	Up
10460	chr4	+	1723227	1746898	Down
10462	chr17	-	6977856	6983626	Down
10463	chr4	+	41992489	42092474	Up
10466	chr7	-	106842000	107204959	Up
10474	chr3	-	9821544	9834695	Up
10476	chr17	-	73034958	73043080	Up
10479	chrX	+	135067598	135129423	Down
10480	chr11	+	32605344	32627808	Up
10487	chr1	+	40505905	40538321	Up
10494	chr2	-	242432089	242449145	Up
10498	chr19	+	10982189	11033453	Up
10501	chr19	-	4542600	4559820	Down
10514	chr17	-	4442192	4458926	Down
10519	chr15	-	90773207	90777279	Up
10521	chr22	-	38879445	38903665	Up
10524	chr11	+	65479467	65487075	Up
10528	chr20	+	2632791	2639039	Up
10533	chr3	+	11313995	11599139	Up
10542	chr1	-	110943871	110950564	Up
10568	chr4	+	25656923	25680370	Down
10585	chr9	+	134378289	134399193	Down
10588	chr15	-	80135889	80136646	Up
10608	chr4	-	2249159	2264021	Up
10610	chr17	-	74559792	74583038	Up
10614	chr17	+	43224684	43229468	Up
10618	chr2	-	85545147	85555548	Up
10627	chr18	+	3247479	3256234	Up
10629	chr11	+	62538775	62554814	Up
10632	chr11	+	118271869	118302211	Up
10657	chr1	+	32479430	32526451	Up
10664	chr16	+	67596310	67673086	Up
10677	chr12	-	58191159	58212487	Up
10694	chr21	-	30428126	30446118	Up
10718	chr10	+	83635070	84746935	Down
10721	chr3	-	121150278	121264853	Down
10724	chr10	-	103544200	103578696	Up
10726	chr1	+	27226729	27273353	Up
10728	chr12	-	57057127	57082159	Up
10730	chr10	-	27399383	27444195	Up
10733	chr4	+	128802016	128820350	Down
10734	chr7	+	99775186	99819111	Up
10735	chrX	+	123094062	123556514	Up
10740	chr22	-	29832818	29874164	Up
10741	chr20	-	18467184	18477887	Up
10776	chr15	-	52839242	52862080	Up
10778	chr18	+	32870246	32890730	Up
10788	chr5	+	75699074	76003957	Up
10800	chrX	-	77526961	77583048	Down
10804	chr13	-	20796110	20806534	Down
10810	chr13	+	27131840	27263085	Up
10841	chr21	-	47556176	47575481	Down
10884	chr5	+	44809027	44820530	Up
10891	chr4	-	23756664	23905712	Down
10899	chr1	-	153946745	153950164	Up
10901	chr14	+	24422795	24438488	Up
10906	chr12	+	112563305	112591407	Up
10912	chr9	+	92219928	92221470	Up
10916	chrX	+	54834032	54842445	Up
10920	chr2	+	237993955	238009109	Up
10921	chr16	-	2303117	2318413	Up
10923	chr5	+	32531739	32604185	Up
10929	chr11	+	94800361	94802388	Up
10944	chr11	+	16634679	16778428	Up
10946	chr1	-	38422647	38456593	Up
10951	chr17	-	46147414	46178883	Up
10954	chr3	+	122785909	122944074	Down
10961	chr12	+	112451120	112461255	Up
10971	chr2	-	9724101	9771143	Up
10974	chr10	+	88727949	88743691	Up
10980	chr7	+	99686577	99689823	Up
10983	chr4	-	77968311	77997158	Up
10992	chr11	+	65818200	65836779	Up
11010	chr12	+	75874460	75897633	Up
11014	chr7	-	6485584	6523873	Up
11034	chr20	+	17550508	17590564	Up
11044	chr5	+	6714718	6757161	Down
11068	chr3	+	50388126	50395891	Up
11070	chr3	-	50392180	50397041	Up
11078	chr22	+	38093011	38172563	Down
11079	chr1	+	2323267	2336883	Up
11096	chr21	-	28290231	28338832	Down
11098	chr11	+	86502101	86663952	Up
11112	chr7	-	27565061	27702614	Up
11113	chr12	-	120123595	120315095	Down
11123	chr1	+	24829387	24867530	Up
11140	chr19	-	10501810	10530797	Up
11170	chr3	-	58549844	58613337	Down
11171	chr12	+	16035325	16056412	Up
11173	chr15	-	79051545	79103773	Down
11174	chr5	-	64444563	64777747	Down
11180	chr3	+	49044495	49053386	Up
11182	chr9	-	136336217	136344259	Down
11183	chr14	-	50885219	51027844	Up
11184	chr19	-	39078281	39109522	Down
11188	chr3	+	52489134	52527087	Down
11224	chr9	-	127620159	127624260	Up
11226	chr12	-	51745031	51786651	Down
11232	chr17	-	62473902	62493154	Up
11238	chrX	+	15706953	15805747	Up
11251	chr11	-	60618413	60623444	Down
11253	chr9	+	139981379	140003635	Down
11261	chr15	+	41523037	41574043	Up
11267	chr17	-	47006678	47022479	Up
11269	chr16	+	70323566	70369186	Up
11275	chr4	+	166128770	166244308	Up
11278	chr13	-	74260226	74708394	Down
11280	chr3	-	38887260	38992052	Down
11282	chr5	-	179224597	179233952	Up
11315	chr1	+	8014351	8045565	Up
11317	chr20	+	43935491	43945803	Down
11321	chr2	+	27851114	27874375	Up
11331	chr12	-	7074490	7079988	Up
11345	chr16	+	75600249	75611779	Up
22794	chr17	+	38296571	38328436	Up
22802	chr1	+	87012761	87046437	Down
22809	chr19	+	50431959	50437192	Up
22818	chr12	+	54694986	54745633	Up
22820	chr3	+	128968449	128996614	Up
22826	chr1	-	28525967	28559536	Up
22853	chr7	+	97736197	97838945	Down
22870	chr19	-	55741148	55770363	Down
22872	chr4	-	83739814	83822319	Up
22888	chr20	-	3088219	3140842	Down
22890	chr14	+	64970430	65000408	Up
22898	chr8	+	142127377	142205907	Down
22904	chr19	-	1107636	1174282	Down
22906	chr3	+	42055294	42267381	Up
22909	chr15	+	31196055	31235311	Up
22932	chr7	-	76239303	76256578	Up
22976	chr7	-	154735397	154794794	Up
22978	chr10	-	104845940	104953056	Up
22989	chr3	-	108099216	108248169	Down
22994	chr17	-	79163393	79196799	Down
23007	chr3	-	155093369	155462856	Down
23008	chr7	+	129710350	129775560	Up
23019	chr16	-	58553855	58663790	Up
23030	chr19	+	4969125	5153606	Up
23031	chr19	+	18208603	18262502	Down
23033	chr6	+	83777385	83881069	Up
23039	chr8	+	21777180	21864096	Up
23040	chr2	-	1792885	2335032	Down
23042	chr16	+	15068448	15233196	Up
23059	chr16	+	3550924	3589048	Up
23061	chr5	-	179289066	179334859	Up
23063	chr10	-	88195013	88281572	Up
23086	chr11	-	108376158	108464465	Up
23091	chr13	-	46528600	46626894	Up
23093	chr14	+	76099968	76421421	Up
23096	chrX	-	53262058	53350522	Down
23098	chr17	+	26691378	26728065	Up
23105	chr5	-	132532147	132948255	Down
23113	chr6	+	43149913	43192325	Down
23118	chr6	+	149539777	149732749	Up
23120	chr5	-	159990127	160279221	Down
23125	chr17	-	4871287	4890960	Down
23145	chr7	+	149776042	149833965	Down
23151	chr22	+	46971909	47075688	Down
23157	chrX	-	118749687	118827333	Up
23158	chr4	-	141541919	141677274	Up
23168	chr15	+	41700606	41775761	Up
23187	chr11	+	118477155	118528741	Down
23191	chr15	+	22892005	23006016	Up
23197	chr5	+	175874629	175937075	Down
23207	chr1	+	16010827	16061264	Down
23210	chr17	-	74708919	74722866	Down
23218	chr3	+	47021173	47051193	Down
23225	chr3	-	13357737	13461809	Down
23237	chr8	-	143692405	143696833	Down
23244	chr4	-	39824483	39979576	Up
23255	chr18	+	8705659	8832776	Down
23258	chr11	-	9160372	9286937	Down
23265	chr17	-	74077087	74117657	Up
23274	chr16	+	11038345	11276046	Down
23279	chr11	-	47799639	47870107	Up
23302	chr17	+	5675554	6027747	Down
23313	chr22	-	45586219	45636650	Up
23318	chr1	-	52873954	53019159	Up
23345	chr6	-	152442819	152958936	Down
23351	chr14	+	24898492	24910540	Up
23359	chr15	-	29412457	29862927	Down
23360	chr11	-	47738072	47788995	Up
23367	chr5	+	154092462	154197167	Up
23389	chr12	-	116395711	116715143	Up
23399	chr17	-	7146910	7155810	Up
23416	chr12	+	49932940	49952091	Down
23435	chr1	+	11072414	11085796	Up
23467	chr22	-	39214457	39239987	Down
23468	chr12	-	54624724	54673886	Up
23478	chr15	-	85212775	85259947	Up
23492	chr22	-	39516172	39548679	Up
23517	chr5	+	54603588	54721409	Up
23521	chr19	+	49990811	49995565	Up
23533	chr17	-	8782233	8869029	Down
23544	chr22	+	26565440	26779562	Down
23545	chr12	+	124196865	124246302	Down
23560	chr10	+	1034338	1065876	Up
23566	chr1	-	85277285	85358896	Up
23569	chr1	+	17634690	17690499	Down
23586	chr9	-	32455300	32526322	Up
23587	chr17	+	7154735	7163259	Up
23593	chr6	+	138724668	138743334	Up
23608	chr7	-	140152840	140179369	Up
23609	chr3	+	12598513	12625212	Up
23621	chr11	-	117156402	117186975	Up
23657	chr4	-	139085251	139163503	Down
23658	chr7	-	32524951	32534895	Up
23673	chr1	+	28099694	28150963	Up
23676	chrX	-	21724090	21776281	Down
23677	chr2	+	235860617	235964358	Up
23746	chr17	-	6297013	6338519	Down
23760	chr22	-	28247657	28316122	Up
23784	chr22	-	16256441	16287937	Up
23788	chr11	-	47638867	47664175	Up
24141	chr20	+	9495005	9511171	Down
24144	chr22	-	26887191	26908471	Up
24149	chr6	-	43274872	43337216	Up
25766	chr12	+	49962001	50038449	Down
25776	chr22	+	39052641	39069859	Up
25792	chr9	-	130928343	130966662	Down
25793	chr22	+	32870663	32894818	Up
25798	chr7	+	97881691	97937162	Up
25799	chr19	+	58978423	58984945	Up
25804	chr19	-	18417040	18434084	Up
25828	chr22	-	36863083	36878077	Up
25833	chr11	+	120107349	120190653	Down
25847	chr3	-	134196548	134205558	Up
25871	chr3	-	112721287	112738708	Up
25873	chr19	+	5674958	5691887	Up
25874	chr1	-	167885967	167906278	Up
25897	chr8	-	101269288	101348446	Up
25906	chr11	-	71817424	71823826	Up
25917	chr3	+	9404526	9428475	Up
25926	chr17	+	65713949	65740647	Up
25945	chr3	+	110788918	110994410	Down
25956	chr10	-	102246399	102289628	Down
25957	chr6	-	99845927	99873207	Up
25974	chr1	+	45965725	45976739	Up
25983	chr14	+	23938897	23979071	Up
25987	chr11	+	76493295	76509198	Up
26009	chr1	-	78028101	78149104	Up
26015	chr15	-	41809374	41836467	Down
26018	chr3	-	66429221	66551687	Down
26031	chr7	-	24836158	25021253	Down
26033	chr10	+	116853124	117708503	Down
26038	chr1	-	6161853	6240183	Down
26051	chr20	+	37434348	37551667	Down
26073	chr17	-	26673659	26684545	Up
26074	chr20	+	20033158	20341346	Down
26088	chr22	+	38004481	38029571	Up
26094	chr14	+	73393040	73426411	Down
26099	chr1	+	16679070	16724640	Up
26118	chr17	+	25621102	25640657	Up
26128	chr10	+	70748487	70776738	Up
26137	chr3	-	114056941	114866118	Up
26155	chr1	-	879584	894689	Up
26224	chr13	-	77566740	77601330	Up
26249	chr5	-	136953189	137071779	Down
26258	chr15	+	45879321	45908197	Up
26286	chr22	-	43192508	43254112	Up
26354	chr3	+	52715172	52728508	Up
26471	chr16	-	28548606	28550495	Up
26502	chr17	+	80416056	80448413	Up
26519	chr11	-	57295936	57298276	Up
26523	chr1	+	36335409	36395211	Up
26959	chr7	+	106809406	106842974	Up
26986	chr8	-	101698044	101735037	Up
26994	chr1	+	51701943	51739127	Up
27034	chr11	+	134123389	134135749	Up
27039	chr5	+	137223657	137278436	Up
27065	chr4	+	4349867	4420785	Up
27068	chr4	-	106290234	106395238	Up
27069	chr10	+	85899196	85913001	Up
27086	chr3	-	71003844	71633140	Up
27102	chr7	-	6061881	6098861	Up
27107	chr3	-	101367733	101396339	Up
27128	chr22	+	37678068	37711382	Down
27141	chr14	-	24774302	24780636	Up
27158	chr9	+	140100147	140111461	Down
27159	chr1	+	111833484	111863188	Down
27183	chr16	+	69345259	69358949	Up
27229	chr15	+	43661419	43699293	Up
27230	chr3	-	150259781	150321015	Up
27236	chr4	+	153701089	153839615	Up
27243	chr19	-	59062933	59066491	Up
27248	chr2	+	54014181	54045956	Up
27249	chr2	-	150426148	150444330	Up
27250	chr10	+	112631565	112659764	Up
27257	chr8	-	38020839	38034248	Up
27296	chr20	-	44002526	44036529	Up
27297	chr7	+	65579591	65619555	Up
27300	chr19	+	58739960	58788815	Up
27330	chrX	-	83318984	83442933	Up
27333	chr3	-	167726465	167813763	Down
27341	chr22	-	42905974	42915808	Up
27342	chr7	+	66093868	66276446	Up
27346	chr17	+	26646121	26655707	Up
27350	chr22	+	39410088	39416357	Up
27429	chr2	+	74756504	74760472	Up
27440	chr22	-	17618401	17646177	Up
27443	chr22	+	17840837	18037850	Up
28513	chr18	-	64168320	64271375	Down
28954	chr20	+	30063096	30072708	Down
28972	chr3	+	52738971	52742182	Up
28988	chr7	+	44084239	44109055	Up
28990	chr3	-	130732719	130746493	Up
29068	chr11	-	130096572	130184581	Up
29079	chr13	-	48627459	48669267	Up
29081	chr2	-	170666591	170681441	Up
29087	chr11	-	134118173	134123264	Up
29091	chr14	-	25278862	25519503	Up
29098	chr17	+	8191815	8193410	Up
29101	chr1	-	1477053	1510249	Up
29119	chr10	-	67672276	69455927	Down
29761	chr21	+	17102344	17252377	Down
29781	chr22	+	50946645	50961901	Up
29855	chr16	+	4896666	4932361	Up
29882	chr9	-	140069236	140082989	Up
29887	chr7	+	26331541	26413949	Down
29893	chr17	-	40724333	40729849	Up
29927	chr3	+	127770484	127790526	Up
29943	chr1	+	17531621	17572500	Down
29945	chr4	+	25378835	25420120	Down
29968	chr9	+	80912059	80945009	Up
29994	chr2	-	160175490	160473203	Up
30009	chr17	+	45810610	45823485	Down
30061	chr2	-	190425305	190448484	Up
30836	chr1	-	94333373	94345474	Up
30844	chr15	-	42190950	42264776	Up
43847	chr19	-	51580752	51587502	Down
50485	chr2	+	217277137	217347776	Up
50487	chr22	-	31530795	31536593	Down
50506	chr15	-	45384848	45406542	Down
50846	chr12	-	49483204	49488602	Down
50862	chr11	-	10533225	10562777	Up
50939	chr3	-	100941390	101039404	Down
50943	chrX	-	49106897	49121288	Up
50999	chr1	-	93615299	93646285	Down
51003	chr17	-	6546635	6554954	Up
51008	chr10	-	73856278	73976892	Up
51012	chr20	-	57608200	57617964	Up
51015	chr5	+	128430444	128449721	Up
51022	chr1	-	193065598	193075244	Up
51030	chr17	+	18684308	18710027	Up
51031	chr17	-	660337	685581	Up
51032	chr1	+	15792404	15817895	Up
51056	chr4	+	17578815	17609595	Up
51060	chr1	-	52485803	52521843	Up
51068	chr3	+	160822484	160971320	Up
51079	chr19	+	19626545	19644285	Up
51094	chr1	-	202909951	202927700	Up
51096	chr17	+	49337889	49375297	Up
51115	chr8	-	87480486	87526586	Up
51119	chr7	-	66452664	66460588	Up
51126	chr20	+	19997760	20014299	Up
51128	chr5	-	133936834	133984961	Up
51131	chr13	+	50069746	50103123	Up
51132	chrX	-	73805052	73834452	Up
51142	chr7	-	56169262	56174269	Up
51155	chr17	-	73131343	73164376	Up
51161	chr3	-	50595462	50608458	Up
51162	chr9	+	139553308	139567130	Down
51184	chr12	-	110890289	110907073	Down
51185	chr3	-	3190676	3221394	Up
51186	chrX	+	102611373	102613397	Up
51187	chr15	-	55473004	55489265	Up
51192	chr16	+	66586466	66600154	Up
51237	chr5	-	138723169	138725770	Up
51241	chr14	-	70791798	70826448	Up
51249	chr1	+	46152886	46160115	Up
51275	chr12	-	112277571	112280706	Up
51276	chr19	-	38045684	38085673	Up
51280	chr9	-	88641061	88715088	Up
51282	chr20	-	34541539	34547394	Up
51309	chrX	+	100805514	100809683	Up
51312	chr8	+	23386318	23432976	Up
51318	chr2	+	86426478	86440917	Up
51322	chr10	+	28821422	28912041	Up
51329	chr12	+	123464607	123467456	Up
51332	chr15	-	42140345	42186275	Down
51339	chr14	+	59100685	59115039	Down
51347	chr12	-	118587606	118810750	Up
51367	chr12	-	121016567	121019201	Up
51371	chr13	+	29233241	29253062	Up
51372	chr3	+	48481667	48485616	Up
51377	chr1	-	192981380	193029237	Up
51378	chr20	-	853296	896977	Down
51380	chr12	-	53551447	53575135	Up
51386	chr22	+	38244875	38285414	Up
51398	chr19	-	12778885	12782170	Up
51399	chr11	+	118889142	118896164	Up
51412	chr7	-	100240720	100254084	Down
51454	chr2	+	189156396	189460653	Up
51465	chr6	-	90036344	90062567	Up
51479	chr17	-	4067201	4167274	Up
51490	chr9	-	131581930	131592100	Up
51504	chr11	-	64083932	64085556	Up
51512	chr22	+	46692638	46726707	Down
51514	chr1	+	212208919	212280742	Down
51524	chr11	+	61129473	61136981	Up
51529	chr17	+	79848666	79858867	Up
51573	chr16	-	19513015	19533467	Up
51582	chr8	-	103838585	103906092	Up
51593	chr7	+	100472733	100486285	Up
51611	chr1	-	101455179	101491644	Up
51637	chr14	+	52456193	52471420	Up
51642	chr11	+	73498361	73576178	Up
51645	chr6	-	36822603	36842800	Up
51646	chr2	+	30369807	30383399	Up
51668	chr1	-	54382247	54411602	Up
51669	chr8	-	29920528	29940723	Up
51686	chr1	+	151735445	151743808	Up
51727	chr1	+	47799469	47844511	Up
51762	chr15	+	63481668	63559981	Up
51808	chr5	+	125935960	125962944	Up
51809	chr4	+	174089904	174245118	Up
53346	chr15	+	83776159	83813606	Up
53635	chr19	+	50353992	50364001	Up
53842	chr4	+	184020446	184241930	Up
53947	chr22	-	43088127	43117304	Up
54059	chr21	+	47706251	47717665	Up
54093	chr21	-	37406839	37451687	Down
54097	chr21	+	42676139	42729358	Up
54187	chr9	+	100819021	100845357	Up
54437	chr3	-	122628041	122747452	Down
54440	chrX	+	128913955	128929177	Down
54456	chr22	+	50528308	50600119	Down
54460	chr1	+	150266289	150281414	Up
54461	chr9	-	139834887	139839148	Down
54482	chr1	+	100598706	100616053	Up
54492	chr5	+	172068269	172118543	Down
54507	chr1	+	150521884	150533413	Down
54508	chr5	+	112419583	112420978	Up
54529	chr2	+	190526111	190535557	Up
54532	chr4	+	120133742	120216672	Down
54535	chr6	-	31110216	31126015	Down
54537	chr10	+	88853918	88951225	Up
54541	chr10	+	74033678	74035794	Up
54543	chr7	-	22852251	22862470	Up
54545	chr5	-	32227100	32313115	Up
54549	chr17	-	71330523	71640228	Down
54554	chr3	-	122130715	122134882	Up
54556	chr7	+	120590803	120617270	Up
54581	chr15	+	85174682	85185695	Up
54622	chr5	-	53179775	53606412	Up
54733	chr11	-	107661717	107799019	Up
54749	chr7	+	37723446	37991543	Up
54752	chr17	+	33448598	33457751	Up
54758	chr16	-	87730091	87799598	Up
54765	chr11	+	35684353	35829775	Up
54777	chr10	-	134621896	134756327	Down
54785	chr17	-	8091652	8093564	Up
54796	chr9	-	16409501	16870841	Down
54812	chr2	+	64751465	64820139	Up
54840	chr9	-	32972604	33025166	Up
54867	chr2	+	27255778	27264563	Down
54868	chr17	+	72772622	72835918	Down
54878	chr15	-	65734801	65810042	Up
54881	chr9	-	103064359	103115221	Up
54885	chrX	+	106045910	106119375	Up
54886	chr9	+	103790991	104087417	Down
54888	chr5	-	6599352	6633404	Up
54893	chr15	-	31231144	31283810	Up
54918	chr3	-	32522804	32544900	Up
54922	chr19	-	49223844	49243978	Down
54925	chr16	-	3432085	3451065	Up
54940	chr4	+	48807229	48863834	Up
54946	chr3	-	125725198	125820404	Down
54964	chr1	+	151020216	151024462	Up
54973	chr1	-	1246965	1260071	Up
54988	chr16	+	20420856	20452658	Down
55004	chr11	-	71796941	71814433	Up
55007	chr22	+	45704849	45737836	Up
55012	chr14	-	35554673	35591723	Up
55024	chr4	+	102332443	102995969	Up
55054	chr2	+	234118697	234204320	Up
55072	chr14	+	24615892	24629870	Up
55083	chr1	+	245318287	245872733	Down
55101	chr19	-	41937223	41946622	Up
55107	chr11	+	69924408	70035634	Down
55114	chr16	-	24930706	25026987	Up
55127	chr1	-	236712305	236767804	Up
55135	chr17	+	7589389	7606820	Up
55150	chr19	-	49621655	49622397	Up
55152	chr3	-	49052921	49059726	Up
55157	chr1	+	173793641	173827684	Up
55173	chr6	-	42174539	42185603	Up
55176	chr10	+	12171636	12211960	Up
55178	chr17	+	685513	695749	Up
55182	chr1	+	44870866	45117396	Up
55190	chrX	-	51232863	51239448	Up
55196	chr12	+	32112304	32146039	Up
55205	chr18	+	56529832	56653712	Up
55207	chr3	+	5163905	5222596	Up
55213	chr13	-	50106082	50159719	Up
55215	chr15	+	89787180	89860492	Up
55222	chr10	-	72058729	72142382	Down
55225	chr1	+	65210778	65298915	Up
55229	chr1	-	2439972	2458039	Down
55239	chr16	+	56485402	56513012	Up
55243	chr1	+	157963063	158070052	Down
55249	chr1	-	155629237	155658791	Up
55250	chr18	+	33709407	33757909	Up
55251	chr20	+	62887094	62926855	Up
55255	chr5	-	76721795	76916436	Up
55262	chr7	-	99752043	99756338	Down
55267	chr22	-	46445358	46450024	Up
55274	chr6	-	170104001	170124151	Up
55281	chr7	+	134832824	134850967	Up
55289	chr2	+	111490150	111875799	Up
55290	chr8	-	37700786	37707422	Up
55299	chr5	+	34915481	34926101	Up
55308	chr16	+	70380732	70407286	Up
55312	chr9	-	79000433	79009433	Up
55322	chr5	+	31532373	31555165	Up
55325	chr4	-	186320694	186347139	Up
55334	chr14	+	69864732	69929105	Up
55342	chr9	-	125871779	126030855	Up
55352	chr17	-	30178883	30186356	Up
55361	chr10	+	99344131	99436191	Up
55362	chr6	+	44094651	44123256	Up
55422	chr19	+	54024235	54083523	Up
55435	chr4	+	113152893	113191203	Up
55449	chr14	-	24407940	24458048	Up
55504	chr13	+	24144509	24250232	Up
55527	chr19	+	4791728	4795571	Up
55540	chr3	+	53880607	53899827	Up
55567	chr16	-	20944433	21170762	Down
55571	chr2	+	101869264	101886778	Up
55588	chr19	+	39881943	39891277	Up
55593	chrX	-	48779305	48815648	Up
55601	chr4	-	169137444	169239958	Down
55603	chr6	-	82201156	82462491	Up
55607	chr7	+	94536514	94925727	Down
55623	chr16	-	20744986	20753406	Up
55624	chr1	-	46654354	46685977	Up
55628	chr18	+	72265106	72777627	Down
55643	chr19	-	1985447	2034880	Up
55654	chr2	-	96914254	96931732	Down
55662	chr10	+	102288829	102319755	Up
55664	chr9	+	4679559	4708398	Up
55680	chr10	-	70100864	70167051	Up
55693	chr11	+	94706845	94732682	Down
55695	chr7	-	72716514	72722864	Up
55700	chr1	+	36621180	36646450	Down
55709	chr11	-	47593749	47600567	Up
55715	chr16	-	57505863	57521239	Up
55720	chr17	-	2225797	2240801	Up
55737	chr16	-	46690054	46723430	Up
55739	chr13	+	111267881	111292340	Up
55744	chr7	-	43648055	43769316	Up
55748	chr18	+	72163051	72188366	Up
55766	chr12	+	14927270	14930936	Up
55769	chr19	-	53097313	53193749	Up
55783	chr16	-	71315292	71323618	Up
55785	chr12	-	95470525	95611258	Down
55787	chrX	+	16804550	16862642	Up
55794	chr16	-	68055179	68057770	Up
55795	chr13	-	113831891	113863029	Up
55799	chr3	+	54156574	55108584	Down
55819	chr5	-	179338651	179499118	Up
55839	chr16	+	81040103	81066719	Up
55856	chr6	+	24667263	24705293	Up
55867	chr11	+	64323098	64340347	Down
55869	chrX	-	71549366	71792953	Up
55884	chr12	-	118470712	118500235	Up
55902	chr20	+	33459949	33515769	Up
55915	chr7	+	55433141	55501435	Up
55924	chr1	-	112223252	112298446	Up
55959	chr20	-	46285092	46415360	Down
55966	chr1	+	4714792	4852594	Down
56000	chrX	-	102330738	102348157	Down
56006	chr19	-	44235301	44259142	Down
56052	chr16	+	5083703	5137380	Up
56154	chr8	-	30689060	30748122	Down
56163	chr13	+	25338290	25454059	Down
56181	chr1	+	26145131	26159432	Up
56259	chr20	+	36322408	36500531	Up
56262	chr9	+	131644391	131680318	Up
56339	chr14	-	21966277	21979517	Up
56413	chr14	+	24774940	24781259	Up
56474	chrX	-	16606126	16731059	Up
56478	chr22	-	31832963	31892094	Up
56623	chr9	-	139323071	139334274	Down
56647	chr10	+	127512115	127542264	Up
56674	chr11	-	8968841	8986558	Up
56776	chr1	+	240177648	240638489	Down
56834	chr11	+	64037534	64056972	Up
56882	chr1	-	151023447	151042801	Up
56884	chr4	-	162305049	163085187	Down
56900	chr1	+	109632425	109639556	Up
56919	chr17	-	5344232	5372380	Down
56924	chr15	+	40509629	40569688	Down
56935	chr11	-	93211638	93276674	Up
56944	chr1	+	114522063	114524876	Down
56947	chr2	+	228189867	228222550	Up
56948	chr14	-	24908972	24912111	Up
56970	chr17	-	42269173	42277481	Down
56978	chr4	+	81105033	81125483	Up
56983	chr3	+	119187785	119213555	Down
56985	chr17	+	10600911	10614550	Up
56995	chr6	+	158733692	158932860	Up
56999	chr3	-	64501333	64673676	Down
57018	chr3	-	156864297	156878549	Up
57084	chr11	+	22359643	22401049	Down
57089	chr10	+	101419263	101465997	Up
57092	chr3	+	101292939	101313281	Up
57109	chr9	-	136271186	136283164	Up
57120	chr6	-	117639374	117923691	Up
57158	chr20	-	42740335	42816218	Down
57168	chr22	+	26825239	26840981	Up
57175	chr11	-	67205519	67211292	Up
57180	chr7	+	152456834	152552463	Up
57181	chr2	+	196440701	196602426	Up
57184	chr15	-	75192328	75199462	Up
57185	chr1	+	24742284	24799466	Up
57194	chr15	-	25922420	26110317	Down
57221	chr6	+	138483058	138665800	Up
57224	chr6	-	138743180	139013708	Up
57228	chr12	-	51638342	51664674	Up
57325	chr20	+	18118762	18169031	Up
57409	chr17	-	73262309	73267308	Up
57448	chr2	+	32582096	32843966	Up
57456	chr3	-	44779153	44803154	Up
57459	chr1	-	153777201	153895451	Up
57460	chr12	-	63037762	63328817	Up
57462	chr9	-	34366668	34376851	Down
57466	chr21	-	33043346	33104388	Down
57484	chr4	-	141780961	142134031	Down
57502	chrX	-	5758678	6146904	Down
57504	chr2	+	42721709	42984087	Down
57507	chr5	-	123972608	124084500	Down
57509	chr8	-	17501304	17658426	Up
57510	chr6	-	43490072	43543812	Up
57511	chr13	+	40229764	40365802	Up
57520	chr2	-	197059094	197458416	Down
57529	chrX	+	109602044	109699562	Down
57530	chr1	+	151482986	151511168	Up
57553	chr22	-	18270415	18507325	Down
57558	chr11	+	77899858	77925757	Down
57559	chr10	+	90639491	90734910	Down
57568	chr1	-	232533711	232697304	Down
57571	chr11	+	67182439	67193078	Down
57579	chr6	+	71122644	71270877	Up
57582	chr9	+	138594031	138684992	Down
57597	chr17	+	79373540	79433357	Down
57608	chr10	-	30301729	30404423	Down
57636	chr17	+	36584662	36668628	Down
57647	chr12	-	125431371	125473668	Down
57648	chr1	+	33207486	33240571	Up
57683	chr2	+	207139387	207179148	Up
57688	chr5	+	60628100	60841997	Down
57700	chr10	+	116581503	116659591	Up
57704	chr9	-	35736863	35749983	Up
57705	chr10	+	49892921	50191001	Down
57715	chr10	+	102729275	102745628	Up
57727	chr20	-	44689624	44718591	Up
57731	chr19	+	40972148	41082370	Down
57786	chr7	+	5085452	5109119	Up
57834	chr19	-	16023177	16045677	Up
57862	chr14	+	74353320	74399214	Up
58478	chr4	+	83351715	83382244	Up
58489	chr15	+	80972025	81047962	Up
58527	chr6	+	139349819	139364439	Up
59084	chr6	-	46126924	46138708	Up
59286	chr19	+	9938568	9940791	Up
59348	chr19	-	52467596	52490109	Up
59352	chr1	+	202163029	202288909	Down
60412	chr7	+	132937829	133751342	Up
60437	chr20	+	58533471	58609066	Up
60468	chr6	-	90636248	91006627	Down
60481	chr6	-	53132196	53213947	Up
60494	chr11	+	86085778	86134151	Down
60509	chr2	+	27265232	27293490	Up
60558	chr4	+	44680444	44702943	Up
63826	chr17	+	2206677	2228554	Up
63891	chr3	+	49726932	49758962	Up
63916	chr20	-	44994688	45061704	Up
63917	chr7	+	151722759	151819425	Up
63925	chr20	-	44577292	44600833	Down
63939	chr20	+	58508819	58523735	Up
63977	chr21	-	43218385	43299591	Down
63982	chr11	+	26210829	26684835	Down
64083	chr5	-	32124810	32174456	Up
64101	chr7	-	127667124	127672160	Down
64112	chr14	-	93648541	93651273	Up
64115	chr10	-	73507316	73533255	Down
64121	chr1	-	39303870	39325495	Up
64132	chr17	+	48423453	48440499	Down
64137	chr11	+	119019722	119033360	Down
64168	chr8	+	91803778	91971636	Up
64343	chr3	-	28356494	28390618	Up
64344	chr19	+	46800303	46846690	Down
64359	chr17	-	702553	883010	Up
64398	chr14	+	67707826	67802536	Up
64403	chr14	-	23516271	23526747	Down
64431	chr12	+	100592900	100635643	Up
64432	chr3	-	15083967	15106842	Up
64478	chr8	-	2792875	4852494	Down
64710	chr1	-	205681947	205719404	Up
64714	chr16	+	333152	337215	Down
64772	chr17	+	77071021	77084681	Down
64781	chr22	-	47080308	47134158	Down
64786	chr12	+	72233487	72320629	Up
64844	chr2	+	160569000	160627538	Up
64855	chr9	-	130267618	130341268	Up
64856	chr1	+	1370241	1378262	Down
64943	chr3	-	52558386	52569070	Down
65061	chr2	+	202655184	202760273	Down
65108	chr1	-	32799433	32801980	Up
65217	chr10	-	55562531	57387702	Down
65220	chr1	-	1682671	1711896	Up
65244	chr12	+	49760367	49921205	Down
65980	chr5	-	850406	892939	Down
65992	chr20	-	3170996	3185331	Down
65996	chr19	+	59084870	59111168	Down
66002	chr19	+	15783567	15807984	Down
66037	chr2	-	198591603	198651486	Down
79000	chr1	-	26158414	26185903	Up
79009	chr10	+	70661034	70706603	Up
79017	chr7	-	30536237	30591095	Up
79036	chr19	+	18668572	18680197	Up
79038	chr14	+	104182067	104200005	Up
79074	chr2	+	105953816	105965668	Up
79083	chr2	+	238394071	238463961	Up
79086	chr19	-	16741562	16771253	Up
79157	chr17	+	74731947	74777531	Up
79165	chr19	-	54658899	54663620	Up
79172	chr2	+	25016005	25045245	Up
79188	chr3	+	14166440	14185179	Down
79258	chr1	-	2522078	2564481	Up
79441	chr4	-	2229191	2243891	Up
79573	chr1	-	231041989	231114621	Down
79576	chrX	-	119059014	119077735	Down
79587	chr13	-	111293759	111365950	Up
79613	chr16	+	68877507	69119083	Up
79621	chr13	+	51483814	51544592	Down
79628	chr5	-	148303202	148442726	Down
79633	chr4	+	126237554	126414087	Down
79644	chr4	+	56212276	56239263	Down
79649	chrX	-	135295381	135338641	Down
79652	chr16	+	1578689	1605581	Down
79660	chr8	-	8993765	9009084	Up
79666	chr8	+	96146032	96168912	Down
79670	chr9	-	88902648	88969369	Up
79671	chr11	+	119037277	119054725	Down
79672	chr17	+	80674559	80688204	Down
79676	chr12	+	123459127	123464590	Up
79690	chr7	-	99756867	99766373	Down
79699	chr1	+	53192126	53293014	Up
79710	chrX	-	106057101	106243474	Up
79717	chr1	+	42921788	42939056	Up
79719	chr15	-	67493371	67547533	Up
79722	chr5	-	55395507	55529186	Down
79730	chr4	+	40751914	40812002	Up
79742	chrX	-	45007619	45060146	Down
79747	chr6	+	146920101	147136598	Down
79751	chr11	-	790475	798316	Up
79762	chr1	+	220863187	220872499	Up
79788	chr19	-	53662466	53696639	Down
79791	chr16	-	87360593	87425748	Down
79807	chr4	+	106629935	106768885	Down
79828	chr2	-	172173919	172291312	Up
79830	chr1	+	35525387	35581460	Up
79831	chr16	+	27214807	27233089	Up
79834	chr15	-	77400471	77712486	Down
79838	chr16	+	19421818	19510435	Up
79845	chr8	-	33405273	33424643	Down
79848	chr8	+	67974661	68108498	Up
79856	chr15	+	64443914	64449680	Up
79863	chr18	+	77794358	77806397	Down
79871	chr10	-	88614453	88615993	Up
79887	chr12	-	14656595	14721283	Up
79901	chr2	+	172378757	172414643	Down
79912	chr12	+	21590549	21623300	Up
79918	chr16	+	58549383	58554431	Up
79933	chr10	-	75404639	75423561	Down
79946	chr10	-	104209594	104211300	Up
79958	chr19	-	6467218	6482568	Up
79961	chr1	-	111729796	111747157	Down
79974	chr7	+	120628731	120937498	Down
79977	chr8	+	102504660	102681954	Up
79981	chr6	-	168456425	168482237	Down
79987	chr9	-	113127531	113342160	Down
80006	chr5	+	64920543	64962060	Up
80012	chr3	-	169804520	169899537	Up
80013	chr10	-	15820169	15902519	Up
80067	chr2	+	172290727	172341562	Up
80086	chr2	+	220117965	220136910	Down
80095	chr19	-	58488421	58514717	Up
80097	chr2	+	130939310	130948302	Up
80114	chr10	+	60272900	60591195	Down
80127	chr14	+	74486056	74549566	Up
80135	chr1	+	84944942	84963473	Up
80144	chr4	+	78978724	79465423	Down
80150	chr11	+	62104920	62160882	Up
80152	chr16	-	67862060	67881714	Up
80173	chr9	+	26947037	27062928	Up
80179	chr17	-	34851477	34899284	Up
80185	chr8	-	33330904	33371119	Up
80199	chr19	-	50310126	50320633	Up
80208	chr15	-	44854894	44955876	Up
80210	chr2	+	232063260	232239548	Down
80212	chr12	-	124403207	124457378	Up
80218	chr3	-	113435307	113465147	Up
80243	chr8	+	68864353	69149265	Down
80254	chr3	+	134204585	134293859	Up
80309	chr2	-	228844666	229046361	Down
80321	chr3	-	138213186	138313380	Up
80332	chr20	-	3648612	3662893	Down
80344	chr14	+	24583404	24594451	Up
80745	chr2	-	39963200	40006407	Up
80762	chr5	+	141488070	141534005	Up
80774	chr17	-	61773262	61778532	Up
80821	chr14	-	53510686	53620000	Down
80824	chr12	-	12628829	12715317	Up
81493	chr1	-	33145507	33169197	Up
81544	chr11	-	75145685	75236948	Down
81551	chr8	-	27092840	27115937	Down
81553	chr2	-	16730727	16847599	Up
81554	chr7	-	74441226	74490064	Up
81555	chr5	-	143537723	143550278	Up
81562	chr2	-	97371666	97405801	Down
81566	chr12	-	51454990	51477447	Down
81609	chr1	+	151584541	151671567	Up
81614	chr15	-	23004684	23034427	Up
81624	chr13	-	60239717	60738121	Down
81789	chr5	-	149372681	149380730	Up
81853	chr6	+	10747992	10852986	Up
81856	chr19	-	53206066	53238326	Up
81929	chr18	+	12947132	12987535	Up
83416	chr1	-	157483167	157522310	Down
83463	chr5	-	176728462	176739758	Up
83596	chr19	+	50168823	50177173	Up
83643	chr10	-	12938627	13141652	Down
83694	chr14	-	75370657	75390099	Down
83695	chr12	+	2985424	2998626	Up
83700	chr11	+	133938820	134021896	Up
83850	chr3	+	138153428	138200528	Down
83854	chr19	-	10203014	10213472	Up
83872	chr1	+	185703683	186160085	Down
83887	chr6	+	167738574	167772991	Up
83933	chr22	-	50683612	50689834	Down
83939	chr3	+	150264465	150302029	Up
83959	chr20	-	3208063	3219836	Down
83992	chr7	-	117350705	117514193	Down
84033	chr1	+	228395831	228566577	Down
84063	chr19	+	36346763	36358011	Down
84064	chr18	-	44633774	44676891	Up
84066	chr1	+	178482212	178517734	Down
84084	chr2	+	130737235	130740311	Up
84124	chr7	-	99084142	99097947	Up
84128	chr2	+	190306159	190340291	Up
84129	chr3	-	132276982	132379567	Up
84153	chr11	-	65482367	65488418	Up
84159	chr10	+	63661059	63856703	Up
84167	chr19	+	16607122	16632163	Up
84176	chr7	+	98836417	98908753	Down
84221	chr21	-	47581062	47604390	Up
84231	chr16	+	2205699	2228130	Up
84248	chr3	+	197464050	197514467	Up
84251	chr1	+	66999066	67213982	Down
84262	chr7	-	1606966	1610641	Down
84268	chr17	+	5322961	5336196	Up
84269	chr2	+	113341817	113346852	Up
84283	chr1	+	156252726	156262976	Up
84292	chr19	+	12777614	12786646	Up
84293	chr10	+	82167585	82192753	Up
84301	chr1	+	15943995	15995539	Up
84311	chr17	+	36452989	36479101	Up
84313	chr17	+	40925454	40931617	Up
84317	chr2	-	131095814	131099922	Up
84318	chr12	+	498439	551811	Up
84328	chr1	-	9982173	10003465	Up
84335	chr19	-	50372295	50381716	Up
84340	chr5	-	74017029	74063196	Up
84433	chr7	-	2945775	3083579	Down
84443	chrX	+	106765680	106848481	Down
84457	chr10	+	60936350	61007534	Up
84460	chrX	-	101137262	101187004	Down
84467	chr19	-	8130286	8214730	Down
84501	chr16	+	89884587	89937727	Down
84513	chr8	-	38120648	38126761	Up
84515	chr20	+	5931298	5975852	Up
84516	chr16	+	23652713	23681195	Up
84530	chr12	+	119419300	119600856	Down
84545	chr10	-	102729215	102747272	Up
84570	chr4	-	109731877	110223813	Down
84624	chr6	+	159590429	159693141	Down
84645	chr22	-	38339528	38349676	Up
84661	chr2	-	32092878	32264881	Up
84693	chr2	-	71336814	71357369	Up
84696	chr2	+	27346682	27353680	Up
84708	chr4	-	54325468	54567572	Up
84747	chr12	+	121148238	121161443	Up
84817	chr17	+	6544078	6547861	Up
84820	chr7	-	43980494	44058774	Up
84823	chr19	-	2427636	2456994	Down
84838	chr1	-	247460714	247495148	Down
84839	chr19	-	3769087	3772233	Down
84851	chr5	-	180681417	180688119	Up
84864	chr3	-	97660662	97691301	Up
84865	chr2	-	74699113	74710535	Up
84878	chr19	-	59024897	59050278	Up
84895	chr9	+	131798900	131834361	Down
84899	chr13	-	101256181	101327347	Down
84914	chr19	+	58361225	58376480	Up
84923	chr17	-	71203492	71232892	Up
84969	chr20	+	42543504	42698256	Down
85015	chr6	-	99880190	99969604	Up
85236	chr6	-	27106073	27114619	Up
85301	chr9	+	116917840	117074791	Down
85352	chr22	-	44639547	44708731	Down
85358	chr22	+	51112843	51171726	Down
85406	chr12	-	56214744	56224608	Up
85457	chr14	+	77564440	77583630	Up
85495	chr14	-	20811207	20811844	Up
85865	chr7	+	89964537	90020769	Up
87769	chr13	-	101183810	101241782	Up
89766	chr21	+	43483068	43563563	Down
89778	chr18	+	61314813	61391127	Up
89797	chr11	+	19372271	20143144	Down
89845	chr6	+	43395104	43418168	Down
89876	chr3	+	119421869	119485949	Up
[truncated: 601 more rows]
