# Supplementary material for: LncRNAs induce oxidative stress and spermatogenesis by regulating endoplasmic reticulum genes and pathways
Source: Aging (Albany NY). 2021 May 6;13(10):13764–87. doi: 10.18632/aging.202971 (PMC8202879; doi:10.18632/aging.202971)
Supplement: Supplementary Table 7 [file aging-13-202971-s007.csv]

Supplementary Table 7. go_org_con.
category	pathway	ontology	goseq	plage
GO:0006614	SRP-dependent cotranslational protein targeting to membrane	BP	2.22E-25	9.75E-08
GO:0006613	cotranslational protein targeting to membrane	BP	7.04E-25	1.44E-07
GO:0045047	protein targeting to ER	BP	3.36E-24	4.59E-07
GO:0072599	establishment of protein localization to endoplasmic reticulum	BP	8.67E-24	6.77E-07
GO:0006413	translational initiation	BP	1.09E-22	1.60E-05
GO:0070972	protein localization to endoplasmic reticulum	BP	1.92E-22	8.58E-07
GO:0022626	cytosolic ribosome	CC	2.63E-22	1.57E-07
GO:0000184	nuclear-transcribed mRNA catabolic process, nonsense-mediated decay	BP	5.37E-21	5.13E-06
GO:0000956	nuclear-transcribed mRNA catabolic process	BP	3.89E-20	8.16E-05
GO:0006605	protein targeting	BP	1.84E-17	4.73E-05
GO:0090150	establishment of protein localization to membrane	BP	1.86E-17	5.65E-05
GO:0045184	establishment of protein localization	BP	2.25E-17	0.001629637
GO:0003723	RNA binding	MF	3.61E-17	0.001873889
GO:0032991	protein-containing complex	CC	5.85E-17	0.004979424
GO:0003735	structural constituent of ribosome	MF	6.68E-17	1.12E-05
GO:0015031	protein transport	BP	1.79E-16	0.001260308
GO:0006402	mRNA catabolic process	BP	4.05E-16	0.000285954
GO:0015833	peptide transport	BP	5.08E-16	0.001241278
GO:0022625	cytosolic large ribosomal subunit	CC	9.90E-16	1.35E-07
GO:0042886	amide transport	BP	1.02E-15	0.001326417
GO:0072594	establishment of protein localization to organelle	BP	1.72E-15	0.000171114
GO:0044445	cytosolic part	CC	2.40E-15	1.77E-05
GO:0006401	RNA catabolic process	BP	3.32E-15	0.000286897
GO:0046907	intracellular transport	BP	3.61E-15	0.001139751
GO:0005829	cytosol	CC	6.14E-15	0.004745141
GO:0044391	ribosomal subunit	CC	8.40E-15	7.02E-06
GO:1903561	extracellular vesicle	CC	8.82E-15	0.000299628
GO:0043230	extracellular organelle	CC	1.03E-14	0.000302678
GO:0006612	protein targeting to membrane	BP	1.26E-14	8.01E-06
GO:0070062	extracellular exosome	CC	1.89E-14	0.000316101
GO:0044446	intracellular organelle part	CC	3.25E-14	0.012722808
GO:0005840	ribosome	CC	3.47E-14	1.55E-05
GO:1990904	ribonucleoprotein complex	CC	5.11E-14	0.000763896
GO:0005737	cytoplasm	CC	6.88E-14	0.03964133
GO:0034655	nucleobase-containing compound catabolic process	BP	7.81E-14	0.000746571
GO:0044265	cellular macromolecule catabolic process	BP	8.65E-14	0.002176339
GO:0006886	intracellular protein transport	BP	9.54E-14	0.000602425
GO:0071705	nitrogen compound transport	BP	1.17E-13	0.002545152
GO:0009057	macromolecule catabolic process	BP	1.56E-13	0.001693787
GO:0043043	peptide biosynthetic process	BP	2.02E-13	0.000497535
GO:0044444	cytoplasmic part	CC	2.89E-13	0.020789702
GO:0044422	organelle part	CC	3.28E-13	0.01560263
GO:0071702	organic substance transport	BP	3.92E-13	0.005986786
GO:0006412	translation	BP	4.16E-13	0.000461313
GO:0019439	aromatic compound catabolic process	BP	4.49E-13	0.000608744
GO:0051649	establishment of localization in cell	BP	4.59E-13	0.001475634
GO:0006518	peptide metabolic process	BP	6.39E-13	0.00048253
GO:0046700	heterocycle catabolic process	BP	7.17E-13	0.000753969
GO:0043228	non-membrane-bounded organelle	CC	7.19E-13	0.00867334
GO:0044270	cellular nitrogen compound catabolic process	BP	9.39E-13	0.000816359
GO:0043232	intracellular non-membrane-bounded organelle	CC	9.95E-13	0.008899442
GO:1901361	organic cyclic compound catabolic process	BP	1.08E-12	0.000619707
GO:0008104	protein localization	BP	1.62E-12	0.003542841
GO:1901575	organic substance catabolic process	BP	2.38E-12	0.002016434
GO:0071840	cellular component organization or biogenesis	BP	2.64E-12	0.014958856
GO:0009056	catabolic process	BP	3.78E-12	0.003441517
GO:0043603	cellular amide metabolic process	BP	4.38E-12	0.000670766
GO:0044248	cellular catabolic process	BP	4.50E-12	0.003515247
GO:0006810	transport	BP	6.52E-12	0.130011309
GO:0033365	protein localization to organelle	BP	7.64E-12	0.000775152
GO:0051641	cellular localization	BP	9.96E-12	0.003180689
GO:0043227	membrane-bounded organelle	CC	1.39E-11	0.030155107
GO:0016071	mRNA metabolic process	BP	1.45E-11	0.001554711
GO:0043604	amide biosynthetic process	BP	1.89E-11	0.00074756
GO:0033036	macromolecule localization	BP	1.92E-11	0.005408062
GO:0051234	establishment of localization	BP	1.94E-11	0.177087436
GO:0031974	membrane-enclosed lumen	CC	5.40E-11	0.007972607
GO:0043233	organelle lumen	CC	5.40E-11	0.007972607
GO:0070013	intracellular organelle lumen	CC	5.40E-11	0.007972607
GO:0044424	intracellular part	CC	5.65E-11	0.051629049
GO:0034613	cellular protein localization	BP	7.50E-11	0.001914839
GO:0005622	intracellular	CC	9.02E-11	0.060364481
GO:0070727	cellular macromolecule localization	BP	9.86E-11	0.001999125
GO:0072657	protein localization to membrane	BP	1.02E-10	0.000236969
GO:0043229	intracellular organelle	CC	1.35E-10	0.037043915
GO:0043231	intracellular membrane-bounded organelle	CC	1.93E-10	0.020311803
GO:0016043	cellular component organization	BP	2.04E-10	0.018927593
GO:0043226	organelle	CC	2.34E-10	0.049879483
GO:0031982	vesicle	CC	2.93E-10	0.007159012
GO:0005912	adherens junction	CC	3.20E-10	6.38E-05
GO:0044421	extracellular region part	CC	4.21E-10	0.005750385
GO:0006996	organelle organization	BP	6.26E-10	0.005485379
GO:0031981	nuclear lumen	CC	6.70E-10	0.008094139
GO:0070161	anchoring junction	CC	7.94E-10	7.14E-05
GO:0015934	large ribosomal subunit	CC	8.04E-10	1.34E-06
GO:0044428	nuclear part	CC	1.02E-09	0.008649234
GO:1901566	organonitrogen compound biosynthetic process	BP	1.69E-09	0.001999547
GO:0005198	structural molecule activity	MF	2.63E-09	1.63E-07
GO:0002181	cytoplasmic translation	BP	2.80E-09	3.90E-05
GO:0022627	cytosolic small ribosomal subunit	CC	5.66E-09	1.77E-06
GO:1901564	organonitrogen compound metabolic process	BP	7.45E-09	0.022103858
GO:0005615	extracellular space	CC	1.10E-08	0.032210878
GO:0022613	ribonucleoprotein complex biogenesis	BP	1.21E-08	0.001046384
GO:0065003	protein-containing complex assembly	BP	1.30E-08	0.0025334
GO:0005654	nucleoplasm	CC	1.50E-08	0.007507182
GO:0043933	protein-containing complex subunit organization	BP	1.64E-08	0.002592814
GO:0051179	localization	BP	1.69E-08	0.53184357
GO:0005938	cell cortex	CC	2.08E-08	0.000599787
GO:0005924	cell-substrate adherens junction	CC	2.47E-08	0.000117949
GO:0005925	focal adhesion	CC	3.26E-08	0.000140959
GO:0030055	cell-substrate junction	CC	4.34E-08	0.000111488
GO:0042254	ribosome biogenesis	BP	1.14E-07	0.000314828
GO:0005576	extracellular region	CC	1.18E-07	0.010624337
GO:0005634	nucleus	CC	1.37E-07	0.016536314
GO:0034622	cellular protein-containing complex assembly	BP	1.96E-07	0.001951941
GO:0010608	posttranscriptional regulation of gene expression	BP	5.54E-07	0.002072497
GO:0042255	ribosome assembly	BP	7.03E-07	7.35E-06
GO:1901363	heterocyclic compound binding	MF	7.06E-07	0.012168049
GO:0044085	cellular component biogenesis	BP	7.82E-07	0.005085333
GO:0099568	cytoplasmic region	CC	1.30E-06	0.012072475
GO:0034660	ncRNA metabolic process	BP	1.86E-06	0.002793183
GO:0044267	cellular protein metabolic process	BP	1.95E-06	0.014347392
GO:0005730	nucleolus	CC	3.19E-06	0.002512552
GO:0044237	cellular metabolic process	BP	3.39E-06	0.029142811
GO:0097159	organic cyclic compound binding	MF	3.62E-06	0.012927825
GO:0071826	ribonucleoprotein complex subunit organization	BP	4.09E-06	0.001009981
GO:0006807	nitrogen compound metabolic process	BP	4.41E-06	0.031540128
GO:0022618	ribonucleoprotein complex assembly	BP	4.62E-06	0.001089719
GO:0044448	cell cortex part	CC	5.23E-06	2.90E-05
GO:0019843	rRNA binding	MF	5.34E-06	2.97E-06
GO:0036109	alpha-linolenic acid metabolic process	BP	6.23E-06	1.83E-05
GO:0015935	small ribosomal subunit	CC	7.76E-06	3.15E-05
GO:0008152	metabolic process	BP	7.84E-06	0.041717277
GO:0034641	cellular nitrogen compound metabolic process	BP	8.02E-06	0.014831306
GO:0034470	ncRNA processing	BP	9.57E-06	0.000577597
GO:0044238	primary metabolic process	BP	1.37E-05	0.037536458
GO:0042273	ribosomal large subunit biogenesis	BP	1.45E-05	0.000147931
GO:0006396	RNA processing	BP	1.46E-05	0.005908739
GO:0010629	negative regulation of gene expression	BP	1.80E-05	0.009629239
GO:0042788	polysomal ribosome	CC	1.85E-05	2.38E-06
GO:0006364	rRNA processing	BP	2.04E-05	0.000133116
GO:0019538	protein metabolic process	BP	2.31E-05	0.030376353
GO:0022607	cellular component assembly	BP	2.91E-05	0.006547909
GO:1902494	catalytic complex	CC	2.97E-05	0.004284197
GO:0051427	hormone receptor binding	MF	3.65E-05	0.005842557
GO:0010605	negative regulation of macromolecule metabolic process	BP	3.82E-05	0.0146744
GO:0071704	organic substance metabolic process	BP	3.99E-05	0.041614061
GO:0030863	cortical cytoskeleton	CC	4.18E-05	1.58E-06
GO:0016072	rRNA metabolic process	BP	4.58E-05	0.000266361
GO:0000027	ribosomal large subunit assembly	BP	4.71E-05	1.87E-05
GO:0061024	membrane organization	BP	4.95E-05	0.000507804
GO:0030163	protein catabolic process	BP	5.09E-05	0.003578144
GO:0045296	cadherin binding	MF	5.91E-05	0.000625754
GO:0048027	mRNA 5'-UTR binding	MF	7.30E-05	0.000237097
GO:0050839	cell adhesion molecule binding	MF	8.70E-05	0.000387127
GO:0030900	forebrain development	BP	0.000100388	7.29E-05
GO:0003729	mRNA binding	MF	0.00010409	0.002110414
GO:0005844	polysome	CC	0.000109412	2.73E-05
GO:0009894	regulation of catabolic process	BP	0.000115552	0.007060186
GO:0009892	negative regulation of metabolic process	BP	0.000116442	0.014657346
GO:1905368	peptidase complex	CC	0.000122533	0.000768538
GO:0035722	interleukin-12-mediated signaling pathway	BP	0.000132428	2.22E-06
GO:0071806	protein transmembrane transport	BP	0.000137253	0.000608599
GO:0022904	respiratory electron transport chain	BP	0.00013791	0.001406102
GO:0031047	gene silencing by RNA	BP	0.000142793	0.002693218
GO:0046483	heterocycle metabolic process	BP	0.000148251	0.01705612
GO:0044877	protein-containing complex binding	MF	0.000165612	0.005649251
GO:0003676	nucleic acid binding	MF	0.000168981	0.013392729
GO:0019899	enzyme binding	MF	0.000176844	0.013729798
GO:0031090	organelle membrane	CC	0.000177155	0.01117883
GO:0006725	cellular aromatic compound metabolic process	BP	0.000181269	0.01724401
GO:0030054	cell junction	CC	0.000185255	0.111444643
GO:0044257	cellular protein catabolic process	BP	0.000190849	0.003969314
GO:1901565	organonitrogen compound catabolic process	BP	0.000211655	0.003768278
GO:0032940	secretion by cell	BP	0.000216902	0.669714063
GO:0044260	cellular macromolecule metabolic process	BP	0.000257574	0.030112294
GO:0071349	cellular response to interleukin-12	BP	0.000273731	3.38E-06
GO:0035770	ribonucleoprotein granule	CC	0.000298339	0.003136206
GO:0033540	fatty acid beta-oxidation using acyl-CoA oxidase	BP	0.000299152	0.002452781
GO:0005739	mitochondrion	CC	0.000299405	0.005486081
GO:0046903	secretion	BP	0.000333241	0.309432277
GO:0070585	protein localization to mitochondrion	BP	0.000337777	0.002095661
GO:0035194	posttranscriptional gene silencing by RNA	BP	0.000342347	0.003630372
GO:0044429	mitochondrial part	CC	0.000350245	0.004645351
GO:0090723	growth cone part	CC	0.000355951	1.51E-07
GO:0070671	response to interleukin-12	BP	0.000367728	3.40E-06
GO:1903321	negative regulation of protein modification by small protein conjugation or removal	BP	0.000368199	0.00205968
GO:1905369	endopeptidase complex	CC	0.000368325	0.00062557
GO:0031397	negative regulation of protein ubiquitination	BP	0.000370207	0.001836123
GO:0017111	nucleoside-triphosphatase activity	MF	0.000378881	0.00289574
GO:0016192	vesicle-mediated transport	BP	0.000387143	0.012769228
GO:0006139	nucleobase-containing compound metabolic process	BP	0.000390051	0.017317742
GO:0070180	large ribosomal subunit rRNA binding	MF	0.000392566	6.73E-08
GO:0008022	protein C-terminus binding	MF	0.000403434	6.25E-05
GO:0016441	posttranscriptional gene silencing	BP	0.000421259	0.003491261
GO:0045202	synapse	CC	0.000424482	0.010089843
GO:0072655	establishment of protein localization to mitochondrion	BP	0.000444936	0.001643121
GO:0051015	actin filament binding	MF	0.00045091	5.49E-05
GO:0098885	modification of postsynaptic actin cytoskeleton	BP	0.000454476	0.000134457
GO:1902527	positive regulation of protein monoubiquitination	BP	0.000462171	3.57E-06
GO:0016282	eukaryotic 43S preinitiation complex	CC	0.00047765	2.23E-05
GO:0003824	catalytic activity	MF	0.000505476	0.035740387
GO:0001732	formation of cytoplasmic translation initiation complex	BP	0.000509484	8.91E-06
GO:0035195	gene silencing by miRNA	BP	0.000509898	0.004489433
GO:0010467	gene expression	BP	0.000524888	0.01873929
GO:0006417	regulation of translation	BP	0.000538287	0.003288468
GO:1901360	organic cyclic compound metabolic process	BP	0.000543026	0.018261035
GO:0042623	ATPase activity, coupled	MF	0.000550862	0.000272159
GO:0035258	steroid hormone receptor binding	MF	0.00057999	0.007260652
GO:0007005	mitochondrion organization	BP	0.000602801	0.001358625
GO:0019904	protein domain specific binding	MF	0.000616772	0.00338114
GO:1901265	nucleoside phosphate binding	MF	0.000626024	0.0124797
GO:0072329	monocarboxylic acid catabolic process	BP	0.000693036	0.008173325
GO:0043209	myelin sheath	CC	0.000701707	0.000101846
GO:0031647	regulation of protein stability	BP	0.000711907	0.002549787
GO:0030864	cortical actin cytoskeleton	CC	0.000724384	2.47E-05
GO:0051603	proteolysis involved in cellular protein catabolic process	BP	0.000752938	0.004284151
GO:0031967	organelle envelope	CC	0.00075322	0.004962405
GO:0031975	envelope	CC	0.00075322	0.004962405
GO:0000166	nucleotide binding	MF	0.000757212	0.012792885
GO:0007568	aging	BP	0.000805973	0.001704313
GO:0032462	regulation of protein homooligomerization	BP	0.000810815	1.15E-06
GO:0000502	proteasome complex	CC	0.000837853	0.00071586
GO:0044403	symbiont process	BP	0.000886515	0.004648583
GO:0098966	perisynaptic extracellular matrix	CC	0.000886673	1.13E-05
GO:0099535	synapse-associated extracellular matrix	CC	0.000886673	1.13E-05
GO:0099544	perisynaptic space	CC	0.000886673	1.13E-05
GO:0070993	translation preinitiation complex	CC	0.000892106	2.20E-05
GO:0045333	cellular respiration	BP	0.000894252	0.005264063
GO:0005856	cytoskeleton	CC	0.000915742	0.11229431
GO:0006626	protein targeting to mitochondrion	BP	0.000964155	0.00145007
GO:0016887	ATPase activity	MF	0.00096456	0.000472406
GO:0046983	protein dimerization activity	MF	0.001013784	0.036148232
GO:0044389	ubiquitin-like protein ligase binding	MF	0.001039846	0.001490504
GO:0033290	eukaryotic 48S preinitiation complex	CC	0.001046941	1.33E-05
GO:0071541	eukaryotic translation initiation factor 3 complex, eIF3m	CC	0.00104943	7.65E-06
GO:0002183	cytoplasmic translational initiation	BP	0.001055521	0.000223856
GO:0016462	pyrophosphatase activity	MF	0.001073783	0.004044812
GO:0022900	electron transport chain	BP	0.001102442	0.002132955
GO:0044455	mitochondrial membrane part	CC	0.001122886	0.00115789
GO:0044271	cellular nitrogen compound biosynthetic process	BP	0.001146589	0.018734238
GO:0098796	membrane protein complex	CC	0.001170643	0.148364176
GO:0051018	protein kinase A binding	MF	0.00118311	9.68E-05
GO:0016817	hydrolase activity, acting on acid anhydrides	MF	0.001185274	0.003915516
GO:0016818	hydrolase activity, acting on acid anhydrides, in phosphorus-containing anhydrides	MF	0.001185274	0.003915516
GO:0021537	telencephalon development	BP	0.001213262	3.43E-07
GO:0030017	sarcomere	CC	0.00121806	4.70E-05
GO:0098800	inner mitochondrial membrane protein complex	CC	0.001253262	0.000932166
GO:0035257	nuclear hormone receptor binding	MF	0.001256182	0.011880784
GO:0044419	interspecies interaction between organisms	BP	0.001335193	0.004817941
GO:0071013	catalytic step 2 spliceosome	CC	0.001336176	0.000621242
GO:0048025	negative regulation of mRNA splicing, via spliceosome	BP	0.001369947	1.83E-05
GO:0034236	protein kinase A catalytic subunit binding	MF	0.001400161	1.32E-05
GO:0031050	dsRNA processing	BP	0.001405021	0.004987083
GO:0070918	production of small RNA involved in gene silencing by RNA	BP	0.001405021	0.004987083
GO:0034315	regulation of Arp2/3 complex-mediated actin nucleation	BP	0.001416281	2.97E-05
GO:0070971	endoplasmic reticulum exit site	CC	0.001418545	7.96E-07
GO:0006625	protein targeting to peroxisome	BP	0.00141859	0.000526209
GO:0072662	protein localization to peroxisome	BP	0.00141859	0.000526209
GO:0072663	establishment of protein localization to peroxisome	BP	0.00141859	0.000526209
GO:0075522	IRES-dependent viral translational initiation	BP	0.001461487	3.20E-05
GO:0065002	intracellular protein transmembrane transport	BP	0.0014636	0.000925876
GO:0006119	oxidative phosphorylation	BP	0.001470985	0.002222355
GO:0019752	carboxylic acid metabolic process	BP	0.001493409	0.009375332
GO:0000028	ribosomal small subunit assembly	BP	0.001515257	1.26E-07
GO:0060592	mammary gland formation	BP	0.001529391	0.000627523
GO:0009062	fatty acid catabolic process	BP	0.001544804	0.01384408
GO:0033119	negative regulation of RNA splicing	BP	0.001548405	2.44E-05
GO:0016787	hydrolase activity	MF	0.001550801	0.058756609
GO:0042274	ribosomal small subunit biogenesis	BP	0.001552224	3.87E-05
GO:1903051	negative regulation of proteolysis involved in cellular protein catabolic process	BP	0.001561007	0.002500316
GO:0016829	lyase activity	MF	0.001601757	7.67E-05
GO:0042490	mechanoreceptor differentiation	BP	0.001617665	0.002596166
GO:0043168	anion binding	MF	0.001619332	0.112625159
GO:1903076	regulation of protein localization to plasma membrane	BP	0.001648026	0.001528368
GO:0008565	protein transporter activity	MF	0.001676519	0.001454231
GO:0003743	translation initiation factor activity	MF	0.001699561	0.000493759
GO:0043632	modification-dependent macromolecule catabolic process	BP	0.001724522	0.003903885
GO:0043574	peroxisomal transport	BP	0.001727437	0.00062659
GO:0019222	regulation of metabolic process	BP	0.001750274	0.031370417
GO:0060113	inner ear receptor cell differentiation	BP	0.001773241	0.005238402
GO:0005852	eukaryotic translation initiation factor 3 complex	CC	0.001792543	3.32E-05
GO:0030953	astral microtubule organization	BP	0.001801105	0.000166319
GO:0043170	macromolecule metabolic process	BP	0.001823055	0.038707776
GO:0015149	hexose transmembrane transporter activity	MF	0.00182926	2.33E-09
GO:0030120	vesicle coat	CC	0.001869492	3.04E-05
GO:0006839	mitochondrial transport	BP	0.001881357	0.002138401
GO:1902414	protein localization to cell junction	BP	0.001898377	3.67E-05
GO:0021954	central nervous system neuron development	BP	0.001910383	0.000229913
GO:0042773	ATP synthesis coupled electron transport	BP	0.001942829	0.000827295
GO:0042775	mitochondrial ATP synthesis coupled electron transport	BP	0.001942829	0.000827295
GO:0006511	ubiquitin-dependent protein catabolic process	BP	0.001956324	0.003991437
GO:0035196	production of miRNAs involved in gene silencing by miRNA	BP	0.001994296	0.004878693
GO:1902525	regulation of protein monoubiquitination	BP	0.00203717	5.96E-06
GO:0090611	ubiquitin-independent protein catabolic process via the multivesicular body sorting pathway	BP	0.002053036	5.28E-05
GO:0005768	endosome	CC	0.002081766	0.009308517
GO:0007031	peroxisome organization	BP	0.002091579	0.000681975
GO:0005767	secondary lysosome	CC	0.002092481	3.40E-06
GO:0098805	whole membrane	CC	0.002098232	0.012717824
GO:1901799	negative regulation of proteasomal protein catabolic process	BP	0.002103366	0.002146845
GO:0006753	nucleoside phosphate metabolic process	BP	0.002124195	0.007149422
GO:0005687	U4 snRNP	CC	0.002136455	1.16E-06
GO:0055086	nucleobase-containing small molecule metabolic process	BP	0.002159128	0.005318124
GO:0016835	carbon-oxygen lyase activity	MF	0.002197878	4.33E-06
GO:0031410	cytoplasmic vesicle	CC	0.002255019	0.087916035
GO:0019081	viral translation	BP	0.002351734	2.70E-05
GO:0006891	intra-Golgi vesicle-mediated transport	BP	0.002389295	0.000154951
GO:0099010	modification of postsynaptic structure	BP	0.002394381	3.77E-05
GO:0031597	cytosolic proteasome complex	CC	0.00240907	0.000274419
GO:0002318	myeloid progenitor cell differentiation	BP	0.002457048	9.25E-08
GO:0097708	intracellular vesicle	CC	0.002481164	0.092654262
GO:0005515	protein binding	MF	0.002507876	0.048418952
GO:0010824	regulation of centrosome duplication	BP	0.00250833	5.54E-05
GO:0062023	collagen-containing extracellular matrix	CC	0.002511782	0.000376862
GO:0031966	mitochondrial membrane	CC	0.002519394	0.003946448
GO:0031329	regulation of cellular catabolic process	BP	0.002532828	0.01078041
GO:0019941	modification-dependent protein catabolic process	BP	0.002535343	0.003903279
GO:0048024	regulation of mRNA splicing, via spliceosome	BP	0.002552709	0.000199142
GO:0022884	macromolecule transmembrane transporter activity	MF	0.002558885	0.000983726
GO:0048291	isotype switching to IgG isotypes	BP	0.002594653	1.02E-07
GO:0005131	growth hormone receptor binding	MF	0.002622822	1.81E-06
GO:0019395	fatty acid oxidation	BP	0.002669748	0.027592886
GO:0006591	ornithine metabolic process	BP	0.002684554	6.64E-07
GO:0045727	positive regulation of translation	BP	0.0026881	0.001832338
GO:0008253	5'-nucleotidase activity	MF	0.002770658	0.001301344
GO:0045007	depurination	BP	0.00279081	0.000128572
GO:0060749	mammary gland alveolus development	BP	0.002868787	7.97E-06
GO:0061377	mammary gland lobule development	BP	0.002868787	7.97E-06
GO:1904375	regulation of protein localization to cell periphery	BP	0.002873346	0.001602842
GO:0047134	protein-disulfide reductase activity	MF	0.002950735	0.000107973
GO:0036464	cytoplasmic ribonucleoprotein granule	CC	0.002995818	0.005834942
GO:1903543	positive regulation of exosomal secretion	BP	0.003020249	0.000189195
GO:0009117	nucleotide metabolic process	BP	0.00303448	0.00695248
GO:0005488	binding	MF	0.003058085	0.131529141
GO:0034440	lipid oxidation	BP	0.003098126	0.027880177
GO:0098888	extrinsic component of presynaptic membrane	CC	0.003116261	0.000423003
GO:0042383	sarcolemma	CC	0.003198695	7.77E-06
GO:0004165	dodecenoyl-CoA delta-isomerase activity	MF	0.003308852	7.17E-08
GO:0005740	mitochondrial envelope	CC	0.003310846	0.004210605
GO:0010606	positive regulation of cytoplasmic mRNA processing body assembly	BP	0.003352308	4.64E-05
GO:0034709	methylosome	CC	0.003370659	5.79E-05
GO:0051125	regulation of actin nucleation	BP	0.003406398	0.000200965
GO:0008320	protein transmembrane transporter activity	MF	0.003426211	0.001338609
GO:1990182	exosomal secretion	BP	0.003446816	2.41E-05
GO:0051087	chaperone binding	MF	0.00345645	0.001522183
GO:0034248	regulation of cellular amide metabolic process	BP	0.003479385	0.004432844
GO:0030507	spectrin binding	MF	0.003491616	6.30E-06
GO:0097110	scaffold protein binding	MF	0.003585141	1.52E-06
GO:0032433	filopodium tip	CC	0.003589766	4.53E-08
GO:0044393	microspike	CC	0.003597582	9.52E-05
GO:0017144	drug metabolic process	BP	0.003599227	0.003854693
GO:0016607	nuclear speck	CC	0.003640154	0.009399595
GO:0047485	protein N-terminus binding	MF	0.003648622	0.001199213
GO:0031074	nucleocytoplasmic transport complex	CC	0.003701363	7.69E-09
GO:0010159	specification of animal organ position	BP	0.003759609	3.40E-06
GO:0031625	ubiquitin protein ligase binding	MF	0.003776244	0.00116559
GO:0007049	cell cycle	BP	0.003800991	0.019866323
GO:1904377	positive regulation of protein localization to cell periphery	BP	0.003846616	1.29E-05
GO:0019210	kinase inhibitor activity	MF	0.003852215	0.001983184
GO:0034314	Arp2/3 complex-mediated actin nucleation	BP	0.003872498	0.00110575
GO:0043292	contractile fiber	CC	0.003886043	0.000139561
GO:0030016	myofibril	CC	0.003895377	5.81E-05
GO:0098974	postsynaptic actin cytoskeleton organization	BP	0.00397012	9.96E-05
GO:0070925	organelle assembly	BP	0.004006834	0.00491731
GO:0051128	regulation of cellular component organization	BP	0.004015465	0.046496733
GO:0007420	brain development	BP	0.004021345	0.004110441
GO:0010821	regulation of mitochondrion organization	BP	0.004054095	0.000762152
GO:0006635	fatty acid beta-oxidation	BP	0.004075721	0.008730036
GO:0009161	ribonucleoside monophosphate metabolic process	BP	0.004079298	0.006352154
GO:0019887	protein kinase regulator activity	MF	0.004112926	0.004035629
GO:2001032	regulation of double-strand break repair via nonhomologous end joining	BP	0.004115025	0.000245668
GO:0009987	cellular process	BP	0.004160467	0.303792252
GO:0016032	viral process	BP	0.004194648	0.004213736
GO:0009259	ribonucleotide metabolic process	BP	0.004254802	0.006489042
GO:0043161	proteasome-mediated ubiquitin-dependent protein catabolic process	BP	0.004321542	0.002665922
GO:0060627	regulation of vesicle-mediated transport	BP	0.004331715	0.009322426
GO:0031386	protein tag	MF	0.004350603	1.95E-05
GO:0000375	RNA splicing, via transesterification reactions	BP	0.004354083	0.002286339
GO:0060596	mammary placode formation	BP	0.004390042	3.35E-05
GO:0015145	monosaccharide transmembrane transporter activity	MF	0.004404796	2.47E-06
GO:0099563	modification of synaptic structure	BP	0.004424397	2.20E-05
GO:1901135	carbohydrate derivative metabolic process	BP	0.004434275	0.028891301
GO:0051082	unfolded protein binding	MF	0.004434588	0.000534925
GO:0030133	transport vesicle	CC	0.004437126	0.000735209
GO:0060255	regulation of macromolecule metabolic process	BP	0.00443874	0.032463904
GO:0044449	contractile fiber part	CC	0.004472698	0.000238051
GO:1901657	glycosyl compound metabolic process	BP	0.004496567	0.000823521
GO:0044464	cell part	CC	0.004521224	0.324396462
GO:0019199	transmembrane receptor protein kinase activity	MF	0.004612309	0.001477335
GO:1901659	glycosyl compound biosynthetic process	BP	0.004700241	6.66E-06
GO:1903541	regulation of exosomal secretion	BP	0.004907142	0.00019291
GO:0097734	extracellular exosome biogenesis	BP	0.005001491	1.50E-05
GO:0006915	apoptotic process	BP	0.005010631	0.064501951
GO:0044451	nucleoplasm part	CC	0.005025664	0.015002999
GO:0034250	positive regulation of cellular amide metabolic process	BP	0.00502643	0.002372886
GO:0045010	actin nucleation	BP	0.005099768	0.001779881
GO:0030904	retromer complex	CC	0.005242204	6.45E-05
GO:0036094	small molecule binding	MF	0.005245184	0.032903113
GO:0042176	regulation of protein catabolic process	BP	0.005282203	0.002905926
GO:0004860	protein kinase inhibitor activity	MF	0.005307849	0.00211527
GO:0000377	RNA splicing, via transesterification reactions with bulged adenosine as nucleophile	BP	0.00537225	0.002366655
GO:0000398	mRNA splicing, via spliceosome	BP	0.00537225	0.002366655
GO:0009123	nucleoside monophosphate metabolic process	BP	0.005376058	0.008737361
GO:0033240	positive regulation of cellular amine metabolic process	BP	0.005387298	0.0001585
GO:0016529	sarcoplasmic reticulum	CC	0.005436579	4.75E-05
GO:0008494	translation activator activity	MF	0.005709779	0.007581703
GO:0050657	nucleic acid transport	BP	0.005791807	0.006096172
GO:0050658	RNA transport	BP	0.005791807	0.006096172
GO:0070647	protein modification by small protein conjugation or removal	BP	0.005792221	0.008741919
GO:0070883	pre-miRNA binding	MF	0.005792738	0.001388862
GO:0000819	sister chromatid segregation	BP	0.005821096	0.00428537
GO:1903078	positive regulation of protein localization to plasma membrane	BP	0.005850344	7.22E-06
GO:0044754	autolysosome	CC	0.005926996	2.23E-06
GO:0005355	glucose transmembrane transporter activity	MF	0.005949612	3.63E-07
GO:0010468	regulation of gene expression	BP	0.005954618	0.027852864
GO:0032463	negative regulation of protein homooligomerization	BP	0.005980471	5.26E-07
GO:0070229	negative regulation of lymphocyte apoptotic process	BP	0.006029268	6.24E-05
GO:0070911	global genome nucleotide-excision repair	BP	0.006079089	0.014055008
GO:0010506	regulation of autophagy	BP	0.006100453	0.009317169
GO:0048519	negative regulation of biological process	BP	0.006177245	0.109874674
GO:0043436	oxoacid metabolic process	BP	0.006185638	0.024305952
GO:0045915	positive regulation of catecholamine metabolic process	BP	0.006195676	8.70E-07
GO:0045964	positive regulation of dopamine metabolic process	BP	0.006195676	8.70E-07
GO:0032553	ribonucleotide binding	MF	0.00625796	0.018583444
GO:0060119	inner ear receptor cell development	BP	0.006290942	0.002284497
GO:0050686	negative regulation of mRNA processing	BP	0.006324181	8.62E-06
GO:1901798	positive regulation of signal transduction by p53 class mediator	BP	0.006330382	1.65E-08
GO:0035639	purine ribonucleoside triphosphate binding	MF	0.006334457	0.018029334
GO:0021670	lateral ventricle development	BP	0.006370587	6.62E-05
GO:1903902	positive regulation of viral life cycle	BP	0.006370993	0.00160933
GO:0042063	gliogenesis	BP	0.006470084	6.57E-06
GO:0005764	lysosome	CC	0.006484118	0.052657466
GO:0071803	positive regulation of podosome assembly	BP	0.006592958	0.038692285
GO:0004714	transmembrane receptor protein tyrosine kinase activity	MF	0.006701273	0.002034063
GO:0010498	proteasomal protein catabolic process	BP	0.006781061	0.003496273
GO:0033043	regulation of organelle organization	BP	0.006812502	0.005321962
GO:0000323	lytic vacuole	CC	0.006821404	0.060742965
GO:0016070	RNA metabolic process	BP	0.006823199	0.02246743
GO:0070402	NADPH binding	MF	0.006845633	0.005803099
GO:0031334	positive regulation of protein complex assembly	BP	0.006846674	0.003055515
GO:0060322	head development	BP	0.006909163	0.011455804
GO:1903363	negative regulation of cellular protein catabolic process	BP	0.00695364	0.003407373
GO:0006403	RNA localization	BP	0.006956474	0.007184374
GO:1904680	peptide transmembrane transporter activity	MF	0.007022457	1.15E-05
GO:0061951	establishment of protein localization to plasma membrane	BP	0.007054338	0.005071773
GO:0008380	RNA splicing	BP	0.007088337	0.004568371
GO:0044437	vacuolar part	CC	0.007164273	0.024972055
GO:0019207	kinase regulator activity	MF	0.007207216	0.007180273
GO:0032555	purine ribonucleotide binding	MF	0.007241647	0.017736142
GO:0033238	regulation of cellular amine metabolic process	BP	0.007349812	4.79E-06
GO:0051286	cell tip	CC	0.007353974	0.001597908
GO:0072521	purine-containing compound metabolic process	BP	0.007364092	0.007512809
GO:0006082	organic acid metabolic process	BP	0.007398361	0.028425465
GO:0071415	cellular response to purine-containing compound	BP	0.00742873	0.000626092
GO:0005790	smooth endoplasmic reticulum	CC	0.007431678	9.71E-07
GO:0016050	vesicle organization	BP	0.007490366	0.000766549
GO:0005743	mitochondrial inner membrane	CC	0.007492241	0.001883882
GO:0017076	purine nucleotide binding	MF	0.007513828	0.015805007
GO:1904813	ficolin-1-rich granule lumen	CC	0.007630997	0.00059879
GO:0051236	establishment of RNA localization	BP	0.007768513	0.007905761
GO:0008144	drug binding	MF	0.007777226	0.039359605
GO:0012505	endomembrane system	CC	0.00782319	0.546113426
GO:0007009	plasma membrane organization	BP	0.007892612	1.13E-10
GO:0005201	extracellular matrix structural constituent	MF	0.007937937	0.000784833
GO:0098588	bounding membrane of organelle	CC	0.007961868	0.047289858
GO:0015078	proton transmembrane transporter activity	MF	0.007968823	2.81E-05
GO:0005773	vacuole	CC	0.007985665	0.025094214
GO:0007032	endosome organization	BP	0.008027861	0.001444582
GO:0008252	nucleotidase activity	MF	0.008112632	0.00265767
GO:0043254	regulation of protein complex assembly	BP	0.00814378	0.003054382
GO:0048285	organelle fission	BP	0.008162808	0.059991351
GO:0050821	protein stabilization	BP	0.008254442	0.00345699
GO:0060740	prostate gland epithelium morphogenesis	BP	0.008259775	1.11E-07
GO:0015629	actin cytoskeleton	CC	0.008270288	0.008966515
GO:0006399	tRNA metabolic process	BP	0.008273144	0.004499375
GO:0031492	nucleosomal DNA binding	MF	0.008420962	0.002172515
GO:0051020	GTPase binding	MF	0.008455916	0.051569195
GO:0009167	purine ribonucleoside monophosphate metabolic process	BP	0.008532305	0.006891999
GO:0044827	modulation by host of viral genome replication	BP	0.008539787	2.03E-05
GO:0019693	ribose phosphate metabolic process	BP	0.008557034	0.007824611
GO:0031491	nucleosome binding	MF	0.008560043	0.002080696
GO:0051246	regulation of protein metabolic process	BP	0.008619807	0.040342145
GO:0060612	adipose tissue development	BP	0.008759212	0.001065045
GO:0005623	cell	CC	0.008843215	0.333832255
GO:0048522	positive regulation of cellular process	BP	0.008875585	0.149870969
GO:0031145	anaphase-promoting complex-dependent catabolic process	BP	0.008908543	0.000180531
GO:0035723	interleukin-15-mediated signaling pathway	BP	0.008932957	0.000776699
GO:0071350	cellular response to interleukin-15	BP	0.008932957	0.000776699
GO:0005777	peroxisome	CC	0.008997442	0.000632683
GO:0042579	microbody	CC	0.008997442	0.000632683
GO:0060443	mammary gland morphogenesis	BP	0.009140677	0.001495631
GO:0051168	nuclear export	BP	0.009160005	0.002627096
GO:0032464	positive regulation of protein homooligomerization	BP	0.009167765	0.000732
GO:0009126	purine nucleoside monophosphate metabolic process	BP	0.009190541	0.006871981
GO:0090304	nucleic acid metabolic process	BP	0.009192933	0.020808483
GO:0044281	small molecule metabolic process	BP	0.009194675	0.01615995
GO:0061631	ubiquitin conjugating enzyme activity	MF	0.009275252	0.001026579
GO:0008179	adenylate cyclase binding	MF	0.009299424	5.31E-06
GO:0098803	respiratory chain complex	CC	0.00937187	0.000987384
GO:0016241	regulation of macroautophagy	BP	0.009436917	0.00871972
GO:0003725	double-stranded RNA binding	MF	0.009574657	0.007613083
GO:0044743	protein transmembrane import into intracellular organelle	BP	0.009596846	0.001691003
GO:0005746	mitochondrial respiratory chain	CC	0.009599556	0.00153743
GO:0000381	regulation of alternative mRNA splicing, via spliceosome	BP	0.0096985	9.27E-05
GO:2001242	regulation of intrinsic apoptotic signaling pathway	BP	0.00972107	0.007835569
GO:1902117	positive regulation of organelle assembly	BP	0.009771327	0.001032604
GO:0055114	oxidation-reduction process	BP	0.009819438	0.008557184
GO:0048302	regulation of isotype switching to IgG isotypes	BP	0.00989258	7.92E-08
GO:0034719	SMN-Sm protein complex	CC	0.009941844	0.000221147
GO:0140112	extracellular vesicle biogenesis	BP	0.009952844	2.90E-05
GO:0035904	aorta development	BP	0.009970507	3.87E-09
GO:1902255	positive regulation of intrinsic apoptotic signaling pathway by p53 class mediator	BP	0.009983989	3.90E-07
GO:0008534	oxidized purine nucleobase lesion DNA N-glycosylase activity	MF	0.00998499	9.06E-06
GO:0031674	I band	CC	0.009992423	6.66E-05
GO:0006574	valine catabolic process	BP	0.010034539	0.000858872
GO:0030950	establishment or maintenance of actin cytoskeleton polarity	BP	0.010080218	0.005089979
GO:0007417	central nervous system development	BP	0.010085499	0.004644588
GO:0097367	carbohydrate derivative binding	MF	0.010269763	0.108978293
GO:0033554	cellular response to stress	BP	0.010368095	0.017388071
GO:0006914	autophagy	BP	0.010379363	0.005239805
GO:0061919	process utilizing autophagic mechanism	BP	0.010379363	0.005239805
GO:0042455	ribonucleoside biosynthetic process	BP	0.01048337	1.27E-05
GO:0036112	medium-chain fatty-acyl-CoA metabolic process	BP	0.010535064	2.39E-06
GO:0006163	purine nucleotide metabolic process	BP	0.010629485	0.008911581
GO:0006405	RNA export from nucleus	BP	0.010653966	0.002963028
GO:0030018	Z disc	CC	0.010655613	0.000123374
GO:0042997	negative regulation of Golgi to plasma membrane protein transport	BP	0.010733988	6.46E-05
GO:0004974	leukotriene receptor activity	MF	0.010748304	2.39E-06
GO:0060512	prostate gland morphogenesis	BP	0.010826511	7.53E-09
GO:0009299	mRNA transcription	BP	0.010833074	1.09E-07
GO:0044430	cytoskeletal part	CC	0.010882853	0.045920051
GO:0007034	vacuolar transport	BP	0.010970003	0.006561329
GO:0030043	actin filament fragmentation	BP	0.010992618	0.000215681
GO:0030137	COPI-coated vesicle	CC	0.011076095	4.72E-05
GO:0009295	nucleoid	CC	0.011118638	0.003184434
GO:0042645	mitochondrial nucleoid	CC	0.011118638	0.003184434
GO:0007006	mitochondrial membrane organization	BP	0.011218539	7.44E-05
GO:0042954	lipoprotein transporter activity	MF	0.011290813	4.62E-06
GO:0006887	exocytosis	BP	0.011296691	0.079726736
GO:0090231	regulation of spindle checkpoint	BP	0.011326651	0.12424695
GO:0090266	regulation of mitotic cell cycle spindle assembly checkpoint	BP	0.011326651	0.12424695
GO:1903504	regulation of mitotic spindle checkpoint	BP	0.011326651	0.12424695
GO:0036258	multivesicular body assembly	BP	0.011402153	0.000821329
GO:0006749	glutathione metabolic process	BP	0.011597288	5.03E-07
GO:0032584	growth cone membrane	CC	0.011649642	7.52E-05
GO:0044242	cellular lipid catabolic process	BP	0.011736932	0.131509721
GO:0051702	interaction with symbiont	BP	0.011739594	0.001695019
GO:0006206	pyrimidine nucleobase metabolic process	BP	0.011751234	0.000291154
GO:0046034	ATP metabolic process	BP	0.011873707	0.003346252
GO:1902600	proton transmembrane transport	BP	0.011891143	6.45E-05
GO:0070106	interleukin-27-mediated signaling pathway	BP	0.011939614	0.007312961
GO:0016528	sarcoplasm	CC	0.011990853	5.64E-05
GO:0012501	programmed cell death	BP	0.01206296	0.2072966
GO:0016508	long-chain-enoyl-CoA hydratase activity	MF	0.012109281	0.001693655
GO:0006900	vesicle budding from membrane	BP	0.012135912	9.80E-05
GO:0090232	positive regulation of spindle checkpoint	BP	0.01218549	0.084115949
GO:0090267	positive regulation of mitotic cell cycle spindle assembly checkpoint	BP	0.01218549	0.084115949
GO:0042996	regulation of Golgi to plasma membrane protein transport	BP	0.012195707	0.000142495
GO:0010856	adenylate cyclase activator activity	MF	0.012270566	6.66E-07
GO:0016627	oxidoreductase activity, acting on the CH-CH group of donors	MF	0.012348638	0.010506671
GO:0048011	neurotrophin TRK receptor signaling pathway	BP	0.012403366	1.54E-08
GO:0008092	cytoskeletal protein binding	MF	0.012462508	0.032697287
GO:0000070	mitotic sister chromatid segregation	BP	0.012621991	0.00284784
GO:1905394	retromer complex binding	MF	0.012877709	0.009779339
GO:0016197	endosomal transport	BP	0.012894274	0.002022677
GO:0048539	bone marrow development	BP	0.012943774	1.24E-10
GO:0099188	postsynaptic cytoskeleton organization	BP	0.012971907	0.000316661
GO:0033143	regulation of intracellular steroid hormone receptor signaling pathway	BP	0.013000542	0.018842596
GO:0042264	peptidyl-aspartic acid hydroxylation	BP	0.013033976	6.46E-06
GO:0000079	regulation of cyclin-dependent protein serine/threonine kinase activity	BP	0.013125648	0.021015928
GO:0030554	adenyl nucleotide binding	MF	0.013169793	0.022570742
GO:0016458	gene silencing	BP	0.013220682	0.0079008
GO:0044829	positive regulation by host of viral genome replication	BP	0.013408558	6.26E-08
GO:0032559	adenyl ribonucleotide binding	MF	0.013446683	0.027029614
GO:0071362	cellular response to ether	BP	0.013464324	5.77E-05
GO:0032787	monocarboxylic acid metabolic process	BP	0.01361961	0.094770511
GO:0048549	positive regulation of pinocytosis	BP	0.013677749	0.000730362
GO:0006596	polyamine biosynthetic process	BP	0.013685159	0.000142042
GO:0050662	coenzyme binding	MF	0.013803543	0.006365333
GO:0043217	myelin maintenance	BP	0.01387131	7.47E-08
GO:1903311	regulation of mRNA metabolic process	BP	0.013891156	0.003359873
GO:0070672	response to interleukin-15	BP	0.014036809	0.005412731
GO:0061650	ubiquitin-like protein conjugating enzyme activity	MF	0.014211693	0.000751616
GO:0098871	postsynaptic actin cytoskeleton	CC	0.014253665	2.53E-05
GO:0006974	cellular response to DNA damage stimulus	BP	0.014406021	0.007658559
GO:0051129	negative regulation of cellular component organization	BP	0.01443241	0.011040906
GO:0051092	positive regulation of NF-kappaB transcription factor activity	BP	0.014526456	0.101267094
GO:0009163	nucleoside biosynthetic process	BP	0.014579324	3.84E-06
GO:0061156	pulmonary artery morphogenesis	BP	0.014621991	0.000247528
GO:0032880	regulation of protein localization	BP	0.014672025	0.027645444
GO:0005524	ATP binding	MF	0.01471756	0.030288161
GO:0036257	multivesicular body organization	BP	0.014731809	0.000422923
GO:0032268	regulation of cellular protein metabolic process	BP	0.014735762	0.036181064
GO:0010822	positive regulation of mitochondrion organization	BP	0.014772171	0.000132186
GO:0042461	photoreceptor cell development	BP	0.014968056	8.34E-06
GO:0006611	protein export from nucleus	BP	0.014968482	0.002036079
GO:0005021	vascular endothelial growth factor-activated receptor activity	MF	0.014997417	1.69E-05
GO:0031730	CCR5 chemokine receptor binding	MF	0.015033791	0.000891641
GO:0046530	photoreceptor cell differentiation	BP	0.015076099	2.00E-07
GO:0009116	nucleoside metabolic process	BP	0.015089011	0.000561208
GO:2000059	negative regulation of ubiquitin-dependent protein catabolic process	BP	0.015105176	0.001041711
GO:0048524	positive regulation of viral process	BP	0.015124773	0.008654876
GO:0010638	positive regulation of organelle organization	BP	0.015130033	0.00185641
GO:0007041	lysosomal transport	BP	0.015151118	0.014857237
GO:0009306	protein secretion	BP	0.01517608	0.107257933
GO:0051119	sugar transmembrane transporter activity	MF	0.015176626	2.36E-08
GO:0051248	negative regulation of protein metabolic process	BP	0.01521325	0.023259374
GO:0002064	epithelial cell development	BP	0.015223132	0.03935597
GO:0001973	adenosine receptor signaling pathway	BP	0.015288662	1.06E-05
GO:0010586	miRNA metabolic process	BP	0.01530232	0.008137147
GO:0003779	actin binding	MF	0.015447652	0.633784622
GO:0009896	positive regulation of catabolic process	BP	0.015522061	0.007273464
GO:0048471	perinuclear region of cytoplasm	CC	0.015611367	0.002508836
GO:0044420	extracellular matrix component	CC	0.015696679	0.000256875
GO:0042803	protein homodimerization activity	MF	0.015748198	0.085779975
GO:0017148	negative regulation of translation	BP	0.01578953	0.004215002
GO:0031083	BLOC-1 complex	CC	0.015803359	0.000178733
GO:0042802	identical protein binding	MF	0.015856516	0.038823102
GO:0060147	regulation of posttranscriptional gene silencing	BP	0.015897577	0.015477514
GO:0060966	regulation of gene silencing by RNA	BP	0.015897577	0.015477514
GO:0051726	regulation of cell cycle	BP	0.01603962	0.016358036
GO:0008186	RNA-dependent ATPase activity	MF	0.01613921	0.000417277
GO:0009119	ribonucleoside metabolic process	BP	0.016287846	0.00061211
GO:0051656	establishment of organelle localization	BP	0.016359452	0.002805044
GO:0030135	coated vesicle	CC	0.016451576	0.000135019
GO:0005217	intracellular ligand-gated ion channel activity	MF	0.016461384	0.001968463
GO:0099738	cell cortex region	CC	0.016529079	1.62E-07
GO:0030117	membrane coat	CC	0.016726918	0.00095491
GO:0048475	coated membrane	CC	0.016726918	0.00095491
GO:0031396	regulation of protein ubiquitination	BP	0.016750899	0.003938702
GO:0051306	mitotic sister chromatid separation	BP	0.016773891	0.456920423
GO:1901137	carbohydrate derivative biosynthetic process	BP	0.016829469	0.129679313
GO:0046605	regulation of centrosome cycle	BP	0.016943321	0.000502154
GO:1905214	regulation of RNA binding	BP	0.016971013	0.001199814
GO:0022411	cellular component disassembly	BP	0.016988478	0.001698021
GO:0044215	other organism	CC	0.017006181	0.000620659
GO:0044216	other organism cell	CC	0.017006181	0.000620659
GO:0044217	other organism part	CC	0.017006181	0.000620659
GO:0016538	cyclin-dependent protein serine/threonine kinase regulator activity	MF	0.017218177	0.00512215
GO:0008135	translation factor activity, RNA binding	MF	0.017247461	0.000825659
GO:0051169	nuclear transport	BP	0.017317716	0.004724892
GO:0030198	extracellular matrix organization	BP	0.017374444	0.001554139
GO:1905475	regulation of protein localization to membrane	BP	0.017458497	0.026310787
GO:0008154	actin polymerization or depolymerization	BP	0.017641802	0.000165112
GO:1903320	regulation of protein modification by small protein conjugation or removal	BP	0.017650464	0.003853017
GO:0060444	branching involved in mammary gland duct morphogenesis	BP	0.017742751	0.000122059
GO:0032269	negative regulation of cellular protein metabolic process	BP	0.017803668	0.017283629
GO:0005782	peroxisomal matrix	CC	0.017841376	0.00071559
GO:0031907	microbody lumen	CC	0.017841376	0.00071559
GO:0016408	C-acyltransferase activity	MF	0.017855262	4.98E-06
GO:0060049	regulation of protein glycosylation	BP	0.017897265	2.07E-06
GO:0009141	nucleoside triphosphate metabolic process	BP	0.017939526	0.004374663
GO:0022612	gland morphogenesis	BP	0.017984725	1.80E-10
GO:0019068	virion assembly	BP	0.018035074	0.000103699
GO:0030140	trans-Golgi network transport vesicle	CC	0.01805802	0.000208367
GO:0005774	vacuolar membrane	CC	0.018080948	0.012460601
GO:0030520	intracellular estrogen receptor signaling pathway	BP	0.018118587	0.042803325
GO:0016491	oxidoreductase activity	MF	0.01818483	0.010293479
GO:0043067	regulation of programmed cell death	BP	0.018422948	0.05364068
GO:0010008	endosome membrane	CC	0.018520362	0.004898823
GO:0005685	U1 snRNP	CC	0.01865514	8.78E-05
GO:0014029	neural crest formation	BP	0.018853402	0.000301251
GO:0004300	enoyl-CoA hydratase activity	MF	0.019032927	0.003781195
GO:0022010	central nervous system myelination	BP	0.019196327	1.35E-05
GO:0032291	axon ensheathment in central nervous system	BP	0.019196327	1.35E-05
GO:0048518	positive regulation of biological process	BP	0.019254383	0.237587573
GO:0075733	intracellular transport of virus	BP	0.01926138	1.54E-05
GO:0005219	ryanodine-sensitive calcium-release channel activity	MF	0.019342283	0.000346857
GO:0016236	macroautophagy	BP	0.019635327	0.003922236
GO:0043022	ribosome binding	MF	0.019641244	0.002270353
GO:0005681	spliceosomal complex	CC	0.019696029	0.002448412
GO:0050661	NADP binding	MF	0.01970313	0.012445912
GO:0005913	cell-cell adherens junction	CC	0.019709775	2.51E-06
GO:0032446	protein modification by small protein conjugation	BP	0.019784835	0.008257869
GO:0017157	regulation of exocytosis	BP	0.019806871	0.019674405
GO:0002476	antigen processing and presentation of endogenous peptide antigen via MHC class Ib	BP	0.019827588	0.003389074
GO:0034039	8-oxo-7,8-dihydroguanine DNA N-glycosylase activity	MF	0.019830348	0.000908396
GO:1902766	skeletal muscle satellite cell migration	BP	0.019831169	3.07E-05
GO:0016722	oxidoreductase activity, oxidizing metal ions	MF	0.019877716	2.59E-05
GO:0036475	neuron death in response to oxidative stress	BP	0.019945753	1.52E-06
GO:0008064	regulation of actin polymerization or depolymerization	BP	0.01996208	0.000595038
GO:0018995	host	CC	0.019998038	0.000904217
GO:0043657	host cell	CC	0.019998038	0.000904217
GO:0009150	purine ribonucleotide metabolic process	BP	0.020032326	0.007812679
GO:0004862	cAMP-dependent protein kinase inhibitor activity	MF	0.020056102	0.071204332
GO:0042178	xenobiotic catabolic process	BP	0.020125922	0.00196199
GO:0030662	coated vesicle membrane	CC	0.02020342	2.69E-05
GO:0016840	carbon-nitrogen lyase activity	MF	0.020219383	1.31E-07
GO:0001632	leukotriene B4 receptor activity	MF	0.020304923	0.000226594
GO:0007468	regulation of rhodopsin gene expression	BP	0.02050034	7.28E-08
GO:0000380	alternative mRNA splicing, via spliceosome	BP	0.020546691	0.000669372
GO:0003865	3-oxo-5-alpha-steroid 4-dehydrogenase activity	MF	0.020701681	0.000881689
GO:0033765	steroid dehydrogenase activity, acting on the CH-CH group of donors	MF	0.020701681	0.000881689
GO:0035671	enone reductase activity	MF	0.020701681	0.000881689
GO:0047751	cholestenone 5-alpha-reductase activity	MF	0.020701681	0.000881689
GO:0061741	chaperone-mediated protein transport involved in chaperone-mediated autophagy	BP	0.020718097	3.56E-07
GO:0016567	protein ubiquitination	BP	0.020737084	0.009201595
GO:0019566	arabinose metabolic process	BP	0.020780548	3.90E-07
GO:0046373	L-arabinose metabolic process	BP	0.020780548	3.90E-07
GO:0046556	alpha-L-arabinofuranosidase activity	MF	0.020780548	3.90E-07
GO:1900452	regulation of long-term synaptic depression	BP	0.020840424	0.002528496
GO:0000726	non-recombinational repair	BP	0.020841842	0.001294997
GO:0006913	nucleocytoplasmic transport	BP	0.020855444	0.005438447
GO:0140014	mitotic nuclear division	BP	0.020881056	0.004250123
GO:0043000	Golgi to plasma membrane CFTR protein transport	BP	0.020902573	2.45E-05
GO:0060051	negative regulation of protein glycosylation	BP	0.020981518	0.011406896
GO:0090285	negative regulation of protein glycosylation in Golgi	BP	0.020981518	0.011406896
GO:0098901	regulation of cardiac muscle cell action potential	BP	0.021018594	1.73E-05
GO:0048763	calcium-induced calcium release activity	MF	0.021023183	0.001023667
GO:0031490	chromatin DNA binding	MF	0.021059361	0.001043222
GO:1904383	response to sodium phosphate	BP	0.021090504	3.81E-06
GO:0034404	nucleobase-containing small molecule biosynthetic process	BP	0.02109262	0.002695171
GO:2000480	negative regulation of cAMP-dependent protein kinase activity	BP	0.02110769	0.043500882
GO:0006303	double-strand break repair via nonhomologous end joining	BP	0.02111675	0.001732447
GO:0034515	proteasome storage granule	CC	0.021161227	0.00012683
GO:2001235	positive regulation of apoptotic signaling pathway	BP	0.021162656	0.000634518
GO:0043244	regulation of protein complex disassembly	BP	0.021224699	3.75E-05
GO:0030540	female genitalia development	BP	0.021265029	0.020818852
GO:0016836	hydro-lyase activity	MF	0.021331443	0.00024279
GO:0042789	mRNA transcription by RNA polymerase II	BP	0.021333282	4.08E-10
GO:0086004	regulation of cardiac muscle cell contraction	BP	0.021463505	7.48E-09
GO:0035498	carnosine metabolic process	BP	0.021522966	1.80E-05
GO:0060741	prostate gland stromal morphogenesis	BP	0.02162884	0.001402696
GO:0030832	regulation of actin filament length	BP	0.021650314	0.000564962
GO:0002790	peptide secretion	BP	0.021774978	0.019707939
GO:0033559	unsaturated fatty acid metabolic process	BP	0.021790085	5.04E-06
GO:0006597	spermine biosynthetic process	BP	0.021900608	1.54E-08
GO:0007626	locomotory behavior	BP	0.021927716	0.000859284
GO:1904029	regulation of cyclin-dependent protein kinase activity	BP	0.021981129	0.017503547
GO:0004815	aspartate-tRNA ligase activity	MF	0.022137284	0.000203952
GO:0060316	positive regulation of ryanodine-sensitive calcium-release channel activity	BP	0.022175984	1.87E-06
GO:0042981	regulation of apoptotic process	BP	0.022195859	0.056052072
GO:0098978	glutamatergic synapse	CC	0.022250474	0.010005248
GO:0015432	bile acid-exporting ATPase activity	MF	0.022262439	2.32E-05
GO:0033283	organic acid-transporting ATPase activity	MF	0.022262439	2.32E-05
GO:0033284	carboxylic acid-transporting ATPase activity	MF	0.022262439	2.32E-05
GO:0033285	monocarboxylic acid-transporting ATPase activity	MF	0.022262439	2.32E-05
GO:0000702	oxidized base lesion DNA N-glycosylase activity	MF	0.022348693	1.96E-07
GO:2001244	positive regulation of intrinsic apoptotic signaling pathway	BP	0.0223851	0.00131061
GO:0038114	interleukin-21-mediated signaling pathway	BP	0.02239431	8.85E-05
GO:0098756	response to interleukin-21	BP	0.02239431	8.85E-05
GO:0098757	cellular response to interleukin-21	BP	0.02239431	8.85E-05
GO:0055105	ubiquitin-protein transferase inhibitor activity	MF	0.022410454	1.11E-06
GO:1990948	ubiquitin ligase inhibitor activity	MF	0.022410454	1.11E-06
GO:0007017	microtubule-based process	BP	0.02241848	0.044646458
GO:0016561	protein import into peroxisome matrix, translocation	BP	0.022448333	0.000961606
GO:0031122	cytoplasmic microtubule organization	BP	0.022777385	0.000228857
GO:0048548	regulation of pinocytosis	BP	0.022781197	0.00700958
GO:0048193	Golgi vesicle transport	BP	0.022896549	0.00115047
GO:0016635	oxidoreductase activity, acting on the CH-CH group of donors, quinone or related compound as acceptor	MF	0.02294499	2.70E-07
GO:0000280	nuclear division	BP	0.023013197	0.405070809
GO:0044388	small protein activating enzyme binding	MF	0.023045167	9.58E-05
GO:0000288	nuclear-transcribed mRNA catabolic process, deadenylation-dependent decay	BP	0.023045727	0.01422394
GO:0017101	aminoacyl-tRNA synthetase multienzyme complex	CC	0.023048592	2.26E-05
GO:0030073	insulin secretion	BP	0.023077028	0.000866507
GO:0006102	isocitrate metabolic process	BP	0.023110338	0.010370281
GO:0043651	linoleic acid metabolic process	BP	0.023141398	0.00084086
GO:0007010	cytoskeleton organization	BP	0.023159298	0.223756052
GO:1905663	positive regulation of telomerase RNA reverse transcriptase activity	BP	0.02321405	0.001920696
GO:0035315	hair cell differentiation	BP	0.023262584	0.016563188
GO:1903312	negative regulation of mRNA metabolic process	BP	0.023348251	0.003044828
GO:0055056	D-glucose transmembrane transporter activity	MF	0.02335011	2.92E-05
GO:0045055	regulated exocytosis	BP	0.023365686	0.645177652
GO:0030518	intracellular steroid hormone receptor signaling pathway	BP	0.023401782	0.014125762
GO:0006508	proteolysis	BP	0.023422002	0.079563202
GO:0005791	rough endoplasmic reticulum	CC	0.023425155	2.06E-06
GO:0032287	peripheral nervous system myelin maintenance	BP	0.023446721	6.67E-10
GO:0019079	viral genome replication	BP	0.023628677	0.001761653
GO:1903179	regulation of dopamine biosynthetic process	BP	0.023631102	0.000522868
GO:1903181	positive regulation of dopamine biosynthetic process	BP	0.023631102	0.000522868
GO:0021895	cerebral cortex neuron differentiation	BP	0.02363534	2.32E-05
GO:0010992	ubiquitin recycling	BP	0.023638729	0.000332812
GO:0061737	leukotriene signaling pathway	BP	0.023652672	2.74E-05
GO:0032010	phagolysosome	CC	0.023663656	6.15E-05
GO:0050954	sensory perception of mechanical stimulus	BP	0.023681306	0.000399848
GO:0043696	dedifferentiation	BP	0.02377902	0.000264951
GO:0043697	cell dedifferentiation	BP	0.02377902	0.000264951
GO:0051000	positive regulation of nitric-oxide synthase activity	BP	0.023825551	0.000126721
GO:0009199	ribonucleoside triphosphate metabolic process	BP	0.023859717	0.003426282
GO:0002444	myeloid leukocyte mediated immunity	BP	0.02386691	0.010640435
GO:0004586	ornithine decarboxylase activity	MF	0.023918279	6.71E-07
GO:1903146	regulation of autophagy of mitochondrion	BP	0.023939334	0.000281453
GO:0048709	oligodendrocyte differentiation	BP	0.024049445	1.51E-05
GO:1903999	negative regulation of eating behavior	BP	0.024092818	7.61E-08
GO:0060122	inner ear receptor cell stereocilium organization	BP	0.024101543	0.000467871
GO:0008645	hexose transmembrane transport	BP	0.024104262	0.03243744
GO:0071540	eukaryotic translation initiation factor 3 complex, eIF3e	CC	0.02411517	7.95E-05
GO:1903615	positive regulation of protein tyrosine phosphatase activity	BP	0.024123221	5.50E-06
GO:0035281	pre-miRNA export from nucleus	BP	0.024132532	3.34E-06
GO:0042565	RNA nuclear export complex	CC	0.024132532	3.34E-06
GO:0042272	nuclear RNA export factor complex	CC	0.024132532	8.53E-08
GO:1902396	protein localization to bicellular tight junction	BP	0.024264936	8.36E-05
GO:2000170	positive regulation of peptidyl-cysteine S-nitrosylation	BP	0.024298096	2.38E-07
GO:0008798	beta-aspartyl-peptidase activity	MF	0.02431269	4.57E-05
GO:0005747	mitochondrial respiratory chain complex I	CC	0.024354569	0.000439843
GO:0030964	NADH dehydrogenase complex	CC	0.024354569	0.000439843
GO:0045271	respiratory chain complex I	CC	0.024354569	0.000439843
GO:0038113	interleukin-9-mediated signaling pathway	BP	0.024387268	0.135069913
GO:0071355	cellular response to interleukin-9	BP	0.024387268	0.135069913
GO:0006397	mRNA processing	BP	0.024408159	0.009602138
GO:0007605	sensory perception of sound	BP	0.024461939	0.000114265
GO:0045070	positive regulation of viral genome replication	BP	0.024465679	0.000557949
GO:0031330	negative regulation of cellular catabolic process	BP	0.024471063	0.007695456
GO:1901355	response to rapamycin	BP	0.0245013	0.002345782
GO:0098798	mitochondrial protein complex	CC	0.024527521	0.003035534
GO:0032713	negative regulation of interleukin-4 production	BP	0.024584586	2.03E-05
GO:0043484	regulation of RNA splicing	BP	0.024634207	0.000476039
GO:0070603	SWI/SNF superfamily-type complex	CC	0.024656134	0.011596896
GO:0090204	protein localization to nuclear pore	BP	0.024714494	3.03E-06
GO:0021955	central nervous system neuron axonogenesis	BP	0.024758156	4.96E-09
GO:0032459	regulation of protein oligomerization	BP	0.024811895	0.001734982
GO:0071140	resolution of mitotic recombination intermediates	BP	0.024947162	0.696472043
GO:0042910	xenobiotic transmembrane transporter activity	MF	0.024981318	7.17E-06
GO:0098907	regulation of SA node cell action potential	BP	0.024982918	8.85E-09
GO:0044772	mitotic cell cycle phase transition	BP	0.025009331	0.006668621
GO:0006449	regulation of translational termination	BP	0.025013217	0.003479171
GO:0002676	regulation of chronic inflammatory response	BP	0.025041497	3.52E-05
GO:0005759	mitochondrial matrix	CC	0.025057461	0.003694324
GO:0009205	purine ribonucleoside triphosphate metabolic process	BP	0.025074037	0.003714426
GO:0015399	primary active transmembrane transporter activity	MF	0.025165838	2.31E-07
GO:0015405	P-P-bond-hydrolysis-driven transmembrane transporter activity	MF	0.025165838	2.31E-07
GO:0075525	viral translational termination-reinitiation	BP	0.025220994	2.06E-05
GO:0070469	respiratory chain	CC	0.025312328	0.001056476
GO:0043653	mitochondrial fragmentation involved in apoptotic process	BP	0.025320952	0.000413929
GO:0008360	regulation of cell shape	BP	0.025459338	0.000382445
GO:0005798	Golgi-associated vesicle	CC	0.025491569	7.32E-06
GO:0051640	organelle localization	BP	0.025525099	0.003139504
GO:0051817	modification of morphology or physiology of other organism involved in symbiotic interaction	BP	0.025564374	0.014400135
GO:0070201	regulation of establishment of protein localization	BP	0.025608627	0.01168039
GO:0030879	mammary gland development	BP	0.025637238	0.868225914
GO:0098686	hippocampal mossy fiber to CA3 synapse	CC	0.025667497	0.001149634
GO:0006631	fatty acid metabolic process	BP	0.025699366	0.024504138
GO:0070436	Grb2-EGFR complex	CC	0.025742367	0.001106209
GO:0042278	purine nucleoside metabolic process	BP	0.025762474	0.000615368
GO:0060623	regulation of chromosome condensation	BP	0.025787983	0.000564428
GO:0038093	Fc receptor signaling pathway	BP	0.0258127	0.002547967
GO:0060523	prostate epithelial cord elongation	BP	0.025835609	7.86E-09
GO:0032354	response to follicle-stimulating hormone	BP	0.025870907	1.23E-06
GO:0051343	positive regulation of cyclic-nucleotide phosphodiesterase activity	BP	0.02596161	1.09E-06
GO:0034629	cellular protein-containing complex localization	BP	0.026001749	0.000775743
GO:1902410	mitotic cytokinetic process	BP	0.026070162	7.45E-07
GO:0016054	organic acid catabolic process	BP	0.026080656	0.001821758
GO:0046395	carboxylic acid catabolic process	BP	0.026080656	0.001821758
GO:0051823	regulation of synapse structural plasticity	BP	0.026124763	1.19E-08
GO:0030914	STAGA complex	CC	0.026159854	0.019180646
GO:0034249	negative regulation of cellular amide metabolic process	BP	0.026190695	0.00590004
GO:0071800	podosome assembly	BP	0.026262526	0.383941068
GO:0009628	response to abiotic stimulus	BP	0.026273816	0.311833182
GO:0005604	basement membrane	CC	0.026323651	4.33E-05
GO:0044770	cell cycle phase transition	BP	0.026353059	0.008120503
GO:0004004	ATP-dependent RNA helicase activity	MF	0.026402242	0.001275126
GO:0032770	positive regulation of monooxygenase activity	BP	0.026611849	3.57E-05
GO:0043243	positive regulation of protein complex disassembly	BP	0.026673188	0.000611135
GO:0046548	retinal rod cell development	BP	0.026697908	1.19E-05
GO:1990542	mitochondrial transmembrane transport	BP	0.026790703	0.009030254
GO:0032470	positive regulation of endoplasmic reticulum calcium ion concentration	BP	0.026897215	0.000709296
GO:0060068	vagina development	BP	0.027029004	0.000282474
GO:1902915	negative regulation of protein polyubiquitination	BP	0.027103879	0.005410183
GO:0061043	regulation of vascular wound healing	BP	0.027126121	6.64E-07
GO:0030291	protein serine/threonine kinase inhibitor activity	MF	0.027193182	0.010294607
GO:0098835	presynaptic endocytic zone membrane	CC	0.027233162	7.75E-05
GO:1903573	negative regulation of response to endoplasmic reticulum stress	BP	0.027233223	0.032478312
GO:0043069	negative regulation of programmed cell death	BP	0.027322928	0.171998485
GO:0008219	cell death	BP	0.02734364	0.282541276
GO:0044438	microbody part	CC	0.027352108	0.000531856
GO:0044439	peroxisomal part	CC	0.027352108	0.000531856
GO:0071801	regulation of podosome assembly	BP	0.027360232	0.418386254
GO:0071438	invadopodium membrane	CC	0.02761862	5.11E-06
GO:2000301	negative regulation of synaptic vesicle exocytosis	BP	0.027658189	0.000107179
GO:0046912	transferase activity, transferring acyl groups, acyl groups converted into alkyl on transfer	MF	0.027747814	0.000125632
GO:0001510	RNA methylation	BP	0.0278011	0.006519646
GO:0101002	ficolin-1-rich granule	CC	0.027806596	0.001189747
GO:0044440	endosomal part	CC	0.02783479	0.00663935
GO:0022402	cell cycle process	BP	0.027853868	0.023001096
GO:0018197	peptidyl-aspartic acid modification	BP	0.027994032	9.79E-10
GO:0017022	myosin binding	MF	0.028169431	0.000224446
GO:0098858	actin-based cell projection	CC	0.028215814	0.030823977
GO:0000320	re-entry into mitotic cell cycle	BP	0.028237774	0.019894581
GO:0055038	recycling endosome membrane	CC	0.028354652	0.000342172
GO:0016651	oxidoreductase activity, acting on NAD(P)H	MF	0.028382264	0.004472399
GO:0035838	growing cell tip	CC	0.028398274	0.014895957
GO:0071076	RNA 3' uridylation	BP	0.028440987	0.002227894
GO:0035900	response to isolation stress	BP	0.0284861	0.005394184
GO:0034185	apolipoprotein binding	MF	0.028505553	0.001060989
GO:0010603	regulation of cytoplasmic mRNA processing body assembly	BP	0.02858936	0.009511717
GO:0106001	intestinal hexose absorption	BP	0.0286375	0.00038193
GO:1990316	Atg1/ULK1 kinase complex	CC	0.028640794	0.028610272
GO:0051851	modification by host of symbiont morphology or physiology	BP	0.028690428	0.002821455
GO:0072534	perineuronal net	CC	0.028730205	3.18E-05
GO:0036309	protein localization to M-band	BP	0.028794442	1.38E-07
GO:0051091	positive regulation of DNA-binding transcription factor activity	BP	0.028823222	0.045207863
GO:0002446	neutrophil mediated immunity	BP	0.028842853	0.004057584
GO:0031012	extracellular matrix	CC	0.028872772	0.001258447
GO:0004222	metalloendopeptidase activity	MF	0.028908711	0.016249654
GO:0004386	helicase activity	MF	0.028985897	0.003376989
GO:1902263	apoptotic process involved in embryonic digit morphogenesis	BP	0.028993304	0.000508776
GO:0051276	chromosome organization	BP	0.029006788	0.007845568
GO:0051262	protein tetramerization	BP	0.029144538	0.000142753
GO:0045981	positive regulation of nucleotide metabolic process	BP	0.029175774	1.49E-06
GO:1900544	positive regulation of purine nucleotide metabolic process	BP	0.029175774	1.49E-06
GO:0030046	parallel actin filament bundle assembly	BP	0.029266147	1.13E-06
GO:0004402	histone acetyltransferase activity	MF	0.029316267	0.001797914
GO:0061136	regulation of proteasomal protein catabolic process	BP	0.029379076	0.009327537
GO:0045920	negative regulation of exocytosis	BP	0.02941427	1.16E-05
GO:0034330	cell junction organization	BP	0.029484189	0.148716019
GO:1904928	coreceptor activity involved in canonical Wnt signaling pathway	MF	0.029509993	0.003911011
GO:0051704	multi-organism process	BP	0.02967118	0.341678658
GO:0031461	cullin-RING ubiquitin ligase complex	CC	0.02978884	0.000504967
GO:0016581	NuRD complex	CC	0.029844978	0.003074757
GO:0090545	CHD-type complex	CC	0.029844978	0.003074757
GO:0030705	cytoskeleton-dependent intracellular transport	BP	0.029861675	0.031406444
GO:0097064	ncRNA export from nucleus	BP	0.029895709	0.000306399
GO:0050957	equilibrioception	BP	0.029896944	1.86E-06
GO:0044249	cellular biosynthetic process	BP	0.029968592	0.023849389
GO:0046689	response to mercury ion	BP	0.030102189	0.000480621
GO:0097742	de novo centriole assembly	BP	0.030153735	4.95E-05
GO:0098535	de novo centriole assembly involved in multi-ciliated epithelial cell differentiation	BP	0.030153735	4.95E-05
GO:0015749	monosaccharide transmembrane transport	BP	0.030340203	0.038527916
GO:0008278	cohesin complex	CC	0.030451419	0.074986398
GO:1903827	regulation of cellular protein localization	BP	0.030682319	0.013163238
GO:0019372	lipoxygenase pathway	BP	0.030875184	0.000758893
GO:0021563	glossopharyngeal nerve development	BP	0.030914774	6.01E-09
GO:0044547	DNA topoisomerase binding	MF	0.030956233	2.17E-05
GO:0000125	PCAF complex	CC	0.030956725	0.013520146
GO:0017053	transcriptional repressor complex	CC	0.030995362	0.005086084
GO:0034040	lipid-transporting ATPase activity	MF	0.031034714	0.001496189
GO:0042908	xenobiotic transport	BP	0.031141681	1.20E-05
GO:0002275	myeloid cell activation involved in immune response	BP	0.031175894	0.008941078
GO:0031333	negative regulation of protein complex assembly	BP	0.031217474	0.002051793
GO:0050684	regulation of mRNA processing	BP	0.031260213	0.00371873
GO:0021952	central nervous system projection neuron axonogenesis	BP	0.031320963	3.58E-06
GO:0000289	nuclear-transcribed mRNA poly(A) tail shortening	BP	0.031324905	0.000987992
GO:0014009	glial cell proliferation	BP	0.031379167	1.42E-06
GO:0010508	positive regulation of autophagy	BP	0.031411156	0.005528785
GO:0034704	calcium channel complex	CC	0.031434908	6.37E-05
GO:0098900	regulation of action potential	BP	0.031559003	9.19E-05
GO:0098876	vesicle-mediated transport to the plasma membrane	BP	0.031566271	0.005134693
GO:0002139	stereocilia coupling link	CC	0.031637443	0.000348315
GO:1905274	regulation of modification of postsynaptic actin cytoskeleton	BP	0.031700818	0.000100436
GO:0097066	response to thyroid hormone	BP	0.031741418	9.03E-05
GO:0099243	extrinsic component of synaptic membrane	CC	0.031810977	0.016833004
GO:0005542	folic acid binding	MF	0.031955682	6.48E-06
GO:0002223	stimulatory C-type lectin receptor signaling pathway	BP	0.031984845	1.84E-06
GO:0006616	SRP-dependent cotranslational protein targeting to membrane, translocation	BP	0.032031921	0.000981948
GO:0004953	icosanoid receptor activity	MF	0.032052869	0.001854328
GO:0034645	cellular macromolecule biosynthetic process	BP	0.032168233	0.024866063
GO:0003433	chondrocyte development involved in endochondral bone morphogenesis	BP	0.032203705	1.03E-11
GO:0006879	cellular iron ion homeostasis	BP	0.032219706	4.94E-07
GO:0030100	regulation of endocytosis	BP	0.032320233	0.037535561
GO:0033192	calmodulin-dependent protein phosphatase activity	MF	0.032328202	0.00383013
GO:0098770	FBXO family protein binding	MF	0.032367772	0.05797029
GO:0015278	calcium-release channel activity	MF	0.032405698	0.002253149
GO:0021953	central nervous system neuron differentiation	BP	0.032455696	0.003541462
GO:0045182	translation regulator activity	MF	0.032459614	0.009986764
GO:0060670	branching involved in labyrinthine layer morphogenesis	BP	0.032539669	0.121599268
GO:0072595	maintenance of protein localization in organelle	BP	0.032553156	5.50E-05
GO:1902415	regulation of mRNA binding	BP	0.032709665	0.000761951
GO:0043256	laminin complex	CC	0.032868099	0.000516765
GO:1901021	positive regulation of calcium ion transmembrane transporter activity	BP	0.032922578	3.13E-05
GO:0043167	ion binding	MF	0.032954059	0.198285425
GO:0003724	RNA helicase activity	MF	0.033112464	0.0021955
GO:0071312	cellular response to alkaloid	BP	0.033130092	2.69E-07
GO:0051028	mRNA transport	BP	0.03315552	0.006183425
GO:0035821	modification of morphology or physiology of other organism	BP	0.033157032	0.01891879
GO:0050885	neuromuscular process controlling balance	BP	0.033210365	0.000693197
GO:0006888	ER to Golgi vesicle-mediated transport	BP	0.033222007	6.16E-05
GO:0008091	spectrin	CC	0.033275533	2.88E-05
GO:0019058	viral life cycle	BP	0.033290311	0.00212273
GO:0055072	iron ion homeostasis	BP	0.033310164	4.66E-06
GO:0016042	lipid catabolic process	BP	0.033345722	0.362754087
GO:0098813	nuclear chromosome segregation	BP	0.033355725	0.250551086
GO:0051601	exocyst localization	BP	0.033420273	0.003050211
GO:0032435	negative regulation of proteasomal ubiquitin-dependent protein catabolic process	BP	0.033667829	0.001930233
GO:0031581	hemidesmosome assembly	BP	0.033786523	0.000197163
GO:0021960	anterior commissure morphogenesis	BP	0.033808398	7.55E-06
GO:0002283	neutrophil activation involved in immune response	BP	0.033874031	0.004460845
GO:0000715	nucleotide-excision repair, DNA damage recognition	BP	0.033914529	0.004680147
GO:0035145	exon-exon junction complex	CC	0.034065684	0.00165595
GO:0043066	negative regulation of apoptotic process	BP	0.034083767	0.183139755
GO:0002377	immunoglobulin production	BP	0.034112356	0.068298481
GO:0030496	midbody	CC	0.034143527	0.007568321
GO:0031419	cobalamin binding	MF	0.034199083	0.055106002
GO:0030029	actin filament-based process	BP	0.034216561	0.78978954
GO:0061733	peptide-lysine-N-acetyltransferase activity	MF	0.034222514	0.003253018
GO:0016604	nuclear body	CC	0.034272941	0.015017734
GO:0006622	protein targeting to lysosome	BP	0.034274769	0.003445878
GO:0006907	pinocytosis	BP	0.034627585	3.95E-06
GO:0042887	amide transmembrane transporter activity	MF	0.034850653	3.40E-06
GO:1901978	positive regulation of cell cycle checkpoint	BP	0.034953901	0.111350325
GO:0022804	active transmembrane transporter activity	MF	0.034981067	0.001113491
GO:0030522	intracellular receptor signaling pathway	BP	0.035064414	0.036252054
GO:0019897	extrinsic component of plasma membrane	CC	0.035141223	0.138279732
GO:0030331	estrogen receptor binding	MF	0.035148354	0.082066784
GO:0015931	nucleobase-containing compound transport	BP	0.035222171	0.009456517
GO:0009309	amine biosynthetic process	BP	0.035294643	0.000194055
GO:0042401	cellular biogenic amine biosynthetic process	BP	0.035294643	0.000194055
GO:0030126	COPI vesicle coat	CC	0.035364632	9.14E-05
GO:0031901	early endosome membrane	CC	0.035385176	0.000652041
GO:0002704	negative regulation of leukocyte mediated immunity	BP	0.035677295	0.032870862
GO:0008137	NADH dehydrogenase (ubiquinone) activity	MF	0.035682193	0.002098169
GO:0050136	NADH dehydrogenase (quinone) activity	MF	0.035682193	0.002098169
GO:0010942	positive regulation of cell death	BP	0.035728762	0.01261449
GO:0036514	dopaminergic neuron axon guidance	BP	0.035761588	0.000236742
GO:1904938	planar cell polarity pathway involved in axon guidance	BP	0.035761588	0.000236742
GO:0030261	chromosome condensation	BP	0.035844752	0.0111531
GO:0035337	fatty-acyl-CoA metabolic process	BP	0.035852126	0.002589081
GO:0033146	regulation of intracellular estrogen receptor signaling pathway	BP	0.035867525	0.01730446
GO:0030838	positive regulation of actin filament polymerization	BP	0.035884027	0.001048658
GO:0046085	adenosine metabolic process	BP	0.035996409	0.00077815
GO:0038179	neurotrophin signaling pathway	BP	0.036033497	0.000593717
GO:1903047	mitotic cell cycle process	BP	0.036062484	0.006052632
GO:0010038	response to metal ion	BP	0.036125704	0.601870951
GO:1900271	regulation of long-term synaptic potentiation	BP	0.036265743	0.025043708
GO:0016798	hydrolase activity, acting on glycosyl bonds	MF	0.036294164	0.64950566
GO:0046794	transport of virus	BP	0.036301726	5.02E-05
GO:0022624	proteasome accessory complex	CC	0.036428081	4.88E-05
GO:0030865	cortical cytoskeleton organization	BP	0.036460527	0.000370373
GO:0042491	inner ear auditory receptor cell differentiation	BP	0.036512136	0.006925197
GO:0003413	chondrocyte differentiation involved in endochondral bone morphogenesis	BP	0.03652765	1.02E-08
GO:0009144	purine nucleoside triphosphate metabolic process	BP	0.036610535	0.005022603
GO:0042776	mitochondrial ATP synthesis coupled proton transport	BP	0.036712904	0.000654749
GO:1904293	negative regulation of ERAD pathway	BP	0.036817722	0.012601683
GO:0072659	protein localization to plasma membrane	BP	0.03686225	0.013802391
GO:0039702	viral budding via host ESCRT complex	BP	0.0368672	0.000192257
GO:0007007	inner mitochondrial membrane organization	BP	0.036895697	0.000596114
GO:0034656	nucleobase-containing small molecule catabolic process	BP	0.03702298	0.01975346
GO:0030127	COPII vesicle coat	CC	0.037076745	2.49E-05
GO:0071104	response to interleukin-9	BP	0.037214809	0.013831256
GO:0042826	histone deacetylase binding	MF	0.037251807	0.010743044
GO:0031547	brain-derived neurotrophic factor receptor signaling pathway	BP	0.037260776	7.98E-07
GO:0032768	regulation of monooxygenase activity	BP	0.037289596	0.0001208
GO:0030952	establishment or maintenance of cytoskeleton polarity	BP	0.037294901	0.013449879
GO:0014003	oligodendrocyte development	BP	0.037307843	2.38E-06
GO:0035458	cellular response to interferon-beta	BP	0.037419033	5.18E-05
GO:0034219	carbohydrate transmembrane transport	BP	0.037499647	0.075557998
GO:0045947	negative regulation of translational initiation	BP	0.037620374	0.000161369
GO:0030574	collagen catabolic process	BP	0.037627735	0.006558909
GO:0048037	cofactor binding	MF	0.037724513	0.016661522
GO:0003159	morphogenesis of an endothelium	BP	0.037742273	0.000987547
GO:0061154	endothelial tube morphogenesis	BP	0.037742273	0.000987547
GO:0060968	regulation of gene silencing	BP	0.037836251	0.020928502
GO:0034085	establishment of sister chromatid cohesion	BP	0.037865507	0.001892405
GO:0019104	DNA N-glycosylase activity	MF	0.037877546	1.68E-07
GO:0006294	nucleotide-excision repair, preincision complex assembly	BP	0.038211849	0.038957274
GO:0010035	response to inorganic substance	BP	0.03823469	0.004598696
GO:0048268	clathrin coat assembly	BP	0.038387139	7.62E-05
GO:0060502	epithelial cell proliferation involved in lung morphogenesis	BP	0.038417067	2.79E-07
GO:1903204	negative regulation of oxidative stress-induced neuron death	BP	0.03872798	3.00E-07
GO:0051899	membrane depolarization	BP	0.038945428	5.55E-09
GO:0001676	long-chain fatty acid metabolic process	BP	0.038959354	0.019104667
GO:0046677	response to antibiotic	BP	0.039199488	0.004972962
GO:1903362	regulation of cellular protein catabolic process	BP	0.039301088	0.006532543
GO:0043312	neutrophil degranulation	BP	0.039302037	0.004967783
GO:1902175	regulation of oxidative stress-induced intrinsic apoptotic signaling pathway	BP	0.039409533	0.016846812
GO:0008584	male gonad development	BP	0.039424554	0.001296513
GO:0042177	negative regulation of protein catabolic process	BP	0.039470757	0.004017666
GO:0016020	membrane	CC	0.039503345	0.145614476
GO:0006897	endocytosis	BP	0.039571317	0.900976347
GO:0086046	membrane depolarization during SA node cell action potential	BP	0.039577872	3.00E-06
GO:0044297	cell body	CC	0.039713615	0.00306781
GO:0006595	polyamine metabolic process	BP	0.039983101	4.22E-05
GO:0098862	cluster of actin-based cell projections	CC	0.040003745	1.60E-06
GO:0034715	pICln-Sm protein complex	CC	0.040052824	1.95E-07
GO:0005694	chromosome	CC	0.040104362	0.010793695
GO:0099078	BORC complex	CC	0.040165439	0.024443397
GO:0033683	nucleotide-excision repair, DNA incision	BP	0.040211447	0.015129134
GO:0086010	membrane depolarization during action potential	BP	0.040390013	1.09E-08
GO:0090151	establishment of protein localization to mitochondrial membrane	BP	0.040432397	3.72E-05
GO:1901857	positive regulation of cellular respiration	BP	0.040466327	5.54E-08
GO:0060603	mammary gland duct morphogenesis	BP	0.040504993	8.03E-05
GO:0045621	positive regulation of lymphocyte differentiation	BP	0.040685944	0.027866836
GO:0030833	regulation of actin filament polymerization	BP	0.040706471	0.000617222
GO:0051920	peroxiredoxin activity	MF	0.040795162	1.76E-05
GO:0070757	interleukin-35-mediated signaling pathway	BP	0.040855565	0.000521406
GO:0090087	regulation of peptide transport	BP	0.041001991	0.014472905
GO:0005765	lysosomal membrane	CC	0.041148261	0.015633013
GO:0051186	cofactor metabolic process	BP	0.041226909	0.004988587
GO:0030857	negative regulation of epithelial cell differentiation	BP	0.041251688	2.00E-07
GO:2000765	regulation of cytoplasmic translation	BP	0.041288097	0.012465895
GO:0003988	acetyl-CoA C-acyltransferase activity	MF	0.041327336	0.000873835
GO:0002063	chondrocyte development	BP	0.041329209	2.74E-06
GO:1905477	positive regulation of protein localization to membrane	BP	0.041370221	0.015576022
GO:0006091	generation of precursor metabolites and energy	BP	0.041471935	0.002985387
GO:0002220	innate immune response activating cell surface receptor signaling pathway	BP	0.041630332	4.00E-06
GO:0009260	ribonucleotide biosynthetic process	BP	0.041732134	0.008072566
GO:0010941	regulation of cell death	BP	0.04174743	0.077204047
GO:0010243	response to organonitrogen compound	BP	0.041804323	0.074552379
GO:0007018	microtubule-based movement	BP	0.041807096	0.02334216
GO:0099170	postsynaptic modulation of chemical synaptic transmission	BP	0.041838836	0.00219766
GO:0070233	negative regulation of T cell apoptotic process	BP	0.041958395	0.000271717
GO:0036230	granulocyte activation	BP	0.042126657	0.004656141
GO:1903115	regulation of actin filament-based movement	BP	0.04222364	9.73E-06
GO:0006285	base-excision repair, AP site formation	BP	0.042227619	0.000670871
GO:0006336	DNA replication-independent nucleosome assembly	BP	0.042255118	0.014261985
GO:0035198	miRNA binding	MF	0.042284885	0.001767147
GO:0032154	cleavage furrow	CC	0.042301288	0.004558641
GO:0014701	junctional sarcoplasmic reticulum membrane	CC	0.042564603	0.004080644
GO:0003954	NADH dehydrogenase activity	MF	0.04260506	0.004407885
GO:0086045	membrane depolarization during AV node cell action potential	BP	0.042656944	8.16E-05
GO:0030660	Golgi-associated vesicle membrane	CC	0.042750285	3.81E-06
GO:0101031	chaperone complex	CC	0.042907385	0.00035721
GO:0005838	proteasome regulatory particle	CC	0.042915745	7.70E-05
GO:0004298	threonine-type endopeptidase activity	MF	0.042982124	0.000350853
GO:0070003	threonine-type peptidase activity	MF	0.042982124	0.000350853
GO:0016842	amidine-lyase activity	MF	0.04302436	6.36E-07
GO:0042470	melanosome	CC	0.043044889	0.00344545
GO:0048770	pigment granule	CC	0.043044889	0.00344545
GO:0060261	positive regulation of transcription initiation from RNA polymerase II promoter	BP	0.043098035	0.004203527
GO:0007091	metaphase/anaphase transition of mitotic cell cycle	BP	0.043105012	0.818162561
GO:0051223	regulation of protein transport	BP	0.043110109	0.016395929
GO:0009898	cytoplasmic side of plasma membrane	CC	0.043117268	0.025124476
GO:0010561	negative regulation of glycoprotein biosynthetic process	BP	0.043123232	0.092928739
GO:0086065	cell communication involved in cardiac conduction	BP	0.043169794	0.006016524
GO:0016584	nucleosome positioning	BP	0.043205466	0.001048226
GO:0043065	positive regulation of apoptotic process	BP	0.043239512	0.01066262
GO:1903829	positive regulation of cellular protein localization	BP	0.043262313	0.012831235
GO:0009895	negative regulation of catabolic process	BP	0.043384905	0.004978868
GO:0098852	lytic vacuole membrane	CC	0.043394431	0.018871808
GO:0046546	development of primary male sexual characteristics	BP	0.043471375	0.002009621
GO:0007040	lysosome organization	BP	0.043501747	0.004129739
GO:0080171	lytic vacuole organization	BP	0.043501747	0.004129739
GO:0043062	extracellular structure organization	BP	0.043551321	0.00076988
GO:0015937	coenzyme A biosynthetic process	BP	0.043608409	0.003270914
GO:0002263	cell activation involved in immune response	BP	0.043623034	0.07356702
GO:0044433	cytoplasmic vesicle part	CC	0.043828502	0.03794433
GO:0006936	muscle contraction	BP	0.0440642	0.005763141
GO:1901569	fatty acid derivative catabolic process	BP	0.044146517	0.000207552
GO:0021782	glial cell development	BP	0.044162451	7.09E-06
GO:0008239	dipeptidyl-peptidase activity	MF	0.044167361	0.005256632
GO:1903054	negative regulation of extracellular matrix organization	BP	0.044310593	0.017954842
GO:0051049	regulation of transport	BP	0.044395401	0.112795516
GO:1990204	oxidoreductase complex	CC	0.044405497	0.006882974
GO:0022890	inorganic cation transmembrane transporter activity	MF	0.044860259	0.001734292
GO:0030041	actin filament polymerization	BP	0.044978682	0.000420144
GO:0002768	immune response-regulating cell surface receptor signaling pathway	BP	0.045080653	0.038743334
GO:0071426	ribonucleoprotein complex export from nucleus	BP	0.045091248	0.002695841
GO:0098589	membrane region	CC	0.045230873	0.007365346
GO:0006732	coenzyme metabolic process	BP	0.04529985	0.003471482
GO:0031503	protein-containing complex localization	BP	0.045358877	0.008393969
GO:0016655	oxidoreductase activity, acting on NAD(P)H, quinone or similar compound as acceptor	MF	0.045415831	0.004273068
GO:0038111	interleukin-7-mediated signaling pathway	BP	0.04544094	0.069355647
GO:0006520	cellular amino acid metabolic process	BP	0.045491851	0.000507603
GO:0005839	proteasome core complex	CC	0.045605703	0.003027827
GO:0004857	enzyme inhibitor activity	MF	0.045612745	0.25029519
GO:1903530	regulation of secretion by cell	BP	0.045637368	0.044309976
GO:0060964	regulation of gene silencing by miRNA	BP	0.045702007	0.021104433
GO:0002443	leukocyte mediated immunity	BP	0.045753067	0.695738832
GO:0009059	macromolecule biosynthetic process	BP	0.045823681	0.025956759
GO:0001518	voltage-gated sodium channel complex	CC	0.045837683	1.55E-06
GO:0071556	integral component of lumenal side of endoplasmic reticulum membrane	CC	0.045876074	0.001005477
GO:0098553	lumenal side of endoplasmic reticulum membrane	CC	0.045876074	0.001005477
GO:0051031	tRNA transport	BP	0.045897881	5.33E-05
GO:0070461	SAGA-type complex	CC	0.045910793	0.013260783
GO:0071007	U2-type catalytic step 2 spliceosome	CC	0.045992261	0.020638239
GO:0006835	dicarboxylic acid transport	BP	0.046030606	0.006942543
GO:1901568	fatty acid derivative metabolic process	BP	0.046064391	0.034021596
GO:0016445	somatic diversification of immunoglobulins	BP	0.046226327	0.000406752
GO:1903779	regulation of cardiac conduction	BP	0.046273363	1.94E-05
GO:0007059	chromosome segregation	BP	0.046356809	0.031678355
GO:0003997	acyl-CoA oxidase activity	MF	0.046356937	0.006144667
GO:0042119	neutrophil activation	BP	0.046389635	0.005436904
GO:0019866	organelle inner membrane	CC	0.046433093	0.0030712
GO:1903050	regulation of proteolysis involved in cellular protein catabolic process	BP	0.046433192	0.007556715
GO:2000252	negative regulation of feeding behavior	BP	0.046510388	3.46E-05
GO:1902177	positive regulation of oxidative stress-induced intrinsic apoptotic signaling pathway	BP	0.046555214	0.000250503
GO:0042587	glycogen granule	CC	0.046744333	0.00198988
GO:0086015	SA node cell action potential	BP	0.046754272	3.45E-05
GO:0086018	SA node cell to atrial cardiac muscle cell signaling	BP	0.046754272	3.45E-05
GO:1905818	regulation of chromosome separation	BP	0.046901835	0.30237308
GO:0014850	response to muscle activity	BP	0.046922341	0.003067568
GO:0001776	leukocyte homeostasis	BP	0.047081984	0.000875742
GO:0035635	entry of bacterium into host cell	BP	0.047094551	2.62E-06
GO:0043044	ATP-dependent chromatin remodeling	BP	0.047146535	0.012606327
GO:0044839	cell cycle G2/M phase transition	BP	0.047217915	0.00073453
GO:0002366	leukocyte activation involved in immune response	BP	0.047238247	0.096649262
GO:0060045	positive regulation of cardiac muscle cell proliferation	BP	0.047295534	5.74E-06
GO:1903203	regulation of oxidative stress-induced neuron death	BP	0.047308384	1.13E-07
GO:0001775	cell activation	BP	0.047339079	0.171848504
GO:0044106	cellular amine metabolic process	BP	0.047345753	9.26E-07
GO:0017085	response to insecticide	BP	0.047462957	0.124749312
GO:1902804	negative regulation of synaptic vesicle transport	BP	0.04754439	0.000107179
GO:0015144	carbohydrate transmembrane transporter activity	MF	0.047636487	0.00802465
GO:0016860	intramolecular oxidoreductase activity	MF	0.047727352	0.000535579
GO:0014074	response to purine-containing compound	BP	0.048033956	0.003842645
GO:0044788	modulation by host of viral process	BP	0.048087199	6.30E-05
GO:0042451	purine nucleoside biosynthetic process	BP	0.048244644	0.000431431
GO:0046129	purine ribonucleoside biosynthetic process	BP	0.048244644	0.000431431
GO:0044766	multi-organism transport	BP	0.048279803	0.001487455
GO:1902579	multi-organism localization	BP	0.048279803	0.001487455
GO:0045619	regulation of lymphocyte differentiation	BP	0.048293319	0.002626321
GO:0007062	sister chromatid cohesion	BP	0.048406629	0.0182567
GO:0090543	Flemming body	CC	0.048486002	0.018616282
GO:0036477	somatodendritic compartment	CC	0.048488271	0.002403172
GO:0098684	photoreceptor ribbon synapse	CC	0.048490063	4.25E-08
GO:0086016	AV node cell action potential	BP	0.048491996	0.007323862
GO:0086027	AV node cell to bundle of His cell signaling	BP	0.048491996	0.007323862
GO:0050792	regulation of viral process	BP	0.048525693	0.006064522
GO:0000152	nuclear ubiquitin ligase complex	CC	0.048604293	0.000366181
GO:0048102	autophagic cell death	BP	0.048695453	2.49E-07
GO:0071313	cellular response to caffeine	BP	0.048809929	1.54E-05
GO:0021889	olfactory bulb interneuron differentiation	BP	0.048840349	0.000278682
GO:0071166	ribonucleoprotein complex localization	BP	0.048885946	0.002344022
GO:0034212	peptide N-acetyltransferase activity	MF	0.048890936	0.003284196
GO:0045445	myoblast differentiation	BP	0.048907874	0.131125943
GO:0098857	membrane microdomain	CC	0.048921708	0.005997627
GO:0010965	regulation of mitotic sister chromatid separation	BP	0.049038959	0.96369391
GO:0000470	maturation of LSU-rRNA	BP	0.049304024	0.005126679
GO:0034446	substrate adhesion-dependent cell spreading	BP	0.049319638	7.24E-05
GO:0034724	DNA replication-independent nucleosome organization	BP	0.049420742	0.006257208
GO:0009083	branched-chain amino acid catabolic process	BP	0.049647829	0.003744678
GO:0000307	cyclin-dependent protein kinase holoenzyme complex	CC	0.049725244	0.013893104
GO:0019003	GDP binding	MF	0.049852048	0.004739858
GO:0048194	Golgi vesicle budding	BP	0.049908391	0.000396113
GO:0030014	CCR4-NOT complex	CC	0.049998018	0.001896063
GO:0009112	nucleobase metabolic process	BP	0.050101373	0.000309513
GO:0030521	androgen receptor signaling pathway	BP	0.050167189	0.005431784
GO:0051289	protein homotetramerization	BP	0.050278506	0.000182186
GO:0030048	actin filament-based movement	BP	0.050519898	1.12E-05
GO:0005680	anaphase-promoting complex	CC	0.050547481	0.012544228
GO:0042462	eye photoreceptor cell development	BP	0.050582586	4.13E-05
GO:0032460	negative regulation of protein oligomerization	BP	0.050717059	1.86E-05
GO:0050999	regulation of nitric-oxide synthase activity	BP	0.050808762	1.77E-05
GO:0098586	cellular response to virus	BP	0.050831166	0.013503408
GO:0071437	invadopodium	CC	0.050947176	0.001639724
GO:0030488	tRNA methylation	BP	0.050951413	0.006796816
GO:0098833	presynaptic endocytic zone	CC	0.051008229	3.48E-05
GO:2000107	negative regulation of leukocyte apoptotic process	BP	0.051086148	0.003872825
GO:0048592	eye morphogenesis	BP	0.051150146	0.003898865
GO:0043068	positive regulation of programmed cell death	BP	0.051251726	0.011519022
GO:0010256	endomembrane system organization	BP	0.051497803	0.003370445
GO:0002764	immune response-regulating signaling pathway	BP	0.051509718	0.065503871
GO:0070862	negative regulation of protein exit from endoplasmic reticulum	BP	0.05153177	0.011302454
GO:0032535	regulation of cellular component size	BP	0.051537652	9.10E-05
GO:0009653	anatomical structure morphogenesis	BP	0.05154855	0.068075962
GO:0006620	posttranslational protein targeting to endoplasmic reticulum membrane	BP	0.051567137	0.005565204
GO:0032051	clathrin light chain binding	MF	0.051641728	0.000933675
GO:0000185	activation of MAPKKK activity	BP	0.051674484	0.000175903
GO:0070997	neuron death	BP	0.051992774	0.213805402
GO:0016579	protein deubiquitination	BP	0.052082795	0.009470824
GO:0031267	small GTPase binding	MF	0.052277227	0.221946149
GO:0046916	cellular transition metal ion homeostasis	BP	0.052290028	4.60E-07
GO:0023056	positive regulation of signaling	BP	0.052291228	0.538768698
GO:0032695	negative regulation of interleukin-12 production	BP	0.052326322	0.006536168
GO:0071383	cellular response to steroid hormone stimulus	BP	0.052327474	0.084398858
GO:0032461	positive regulation of protein oligomerization	BP	0.052742525	0.000249546
GO:0050998	nitric-oxide synthase binding	MF	0.052791308	4.24E-05
GO:0008344	adult locomotory behavior	BP	0.052957312	0.006747535
GO:0021591	ventricular system development	BP	0.053106562	0.493030615
GO:0006446	regulation of translational initiation	BP	0.053257819	0.003276745
GO:0090398	cellular senescence	BP	0.053299197	0.003525846
GO:2000767	positive regulation of cytoplasmic translation	BP	0.05330253	0.027062698
GO:0051784	negative regulation of nuclear division	BP	0.05342882	0.344301196
GO:0006383	transcription by RNA polymerase III	BP	0.053470792	0.022588825
GO:0061025	membrane fusion	BP	0.053585257	0.005669528
GO:1990778	protein localization to cell periphery	BP	0.053613549	0.015739779
GO:0051298	centrosome duplication	BP	0.053666543	0.042170473
GO:0039529	RIG-I signaling pathway	BP	0.05389562	0.040018095
GO:1902626	assembly of large subunit precursor of preribosome	BP	0.053901922	6.35E-07
GO:0002428	antigen processing and presentation of peptide antigen via MHC class Ib	BP	0.053901922	0.001716364
GO:0002396	MHC protein complex assembly	BP	0.053901922	0.001165423
GO:0051130	positive regulation of cellular component organization	BP	0.053924662	0.02049534
GO:0098910	regulation of atrial cardiac muscle cell action potential	BP	0.053927776	1.14E-08
GO:0010796	regulation of multivesicular body size	BP	0.053937749	1.87E-07
GO:0040029	regulation of gene expression, epigenetic	BP	0.053961123	0.00806154
GO:2001034	positive regulation of double-strand break repair via nonhomologous end joining	BP	0.054004779	0.001162862
GO:0009138	pyrimidine nucleoside diphosphate metabolic process	BP	0.054038683	0.001416794
GO:0032417	positive regulation of sodium:proton antiporter activity	BP	0.054050927	0.002337288
GO:1903936	cellular response to sodium arsenite	BP	0.054093165	0.000139536
GO:0043492	ATPase activity, coupled to movement of substances	MF	0.05411749	6.90E-05
GO:0030292	protein tyrosine kinase inhibitor activity	MF	0.054123126	1.94E-05
GO:0061738	late endosomal microautophagy	BP	0.05415807	1.05E-06
GO:1905146	lysosomal protein catabolic process	BP	0.054320285	2.07E-05
GO:0000339	RNA cap binding	MF	0.054386625	0.021491708
GO:0008637	apoptotic mitochondrial changes	BP	0.054627779	0.000590493
GO:1902074	response to salt	BP	0.054665028	0.003696455
GO:0001936	regulation of endothelial cell proliferation	BP	0.054670408	0.003283004
GO:0002070	epithelial cell maturation	BP	0.054981427	0.000430725
GO:0032299	ribonuclease H2 complex	CC	0.055071401	0.00144179
GO:0007569	cell aging	BP	0.055176326	0.002032654
GO:0004129	cytochrome-c oxidase activity	MF	0.055209627	2.85E-05
GO:0015002	heme-copper terminal oxidase activity	MF	0.055209627	2.85E-05
GO:0016676	oxidoreductase activity, acting on a heme group of donors, oxygen as acceptor	MF	0.055209627	2.85E-05
GO:1901896	positive regulation of calcium-transporting ATPase activity	BP	0.05525985	0.044082887
GO:0044784	metaphase/anaphase transition of cell cycle	BP	0.055513046	0.910875796
GO:0004723	calcium-dependent protein serine/threonine phosphatase activity	MF	0.055588368	0.002941832
GO:0008026	ATP-dependent helicase activity	MF	0.055617815	0.001261899
GO:0070035	purine NTP-dependent helicase activity	MF	0.055617815	0.001261899
GO:0061952	midbody abscission	BP	0.055683251	3.34E-06
GO:0009041	uridylate kinase activity	MF	0.055723927	0.000832564
GO:1903576	response to L-arginine	BP	0.055729135	0.594497825
GO:0031510	SUMO activating enzyme complex	CC	0.055821939	0.003675139
GO:0045545	syndecan binding	MF	0.055951985	0.000441351
GO:0070920	regulation of production of small RNA involved in gene silencing by RNA	BP	0.055992849	0.003481472
GO:0008033	tRNA processing	BP	0.055997498	0.004986584
GO:1905936	regulation of germ cell proliferation	BP	0.056110602	0.423056421
GO:2000254	regulation of male germ cell proliferation	BP	0.056110602	0.423056421
GO:1904627	response to phorbol 13-acetate 12-myristate	BP	0.056152468	0.002934327
GO:1904628	cellular response to phorbol 13-acetate 12-myristate	BP	0.056152468	0.002934327
GO:0001754	eye photoreceptor cell differentiation	BP	0.056220337	6.02E-06
GO:0072357	PTW/PP1 phosphatase complex	CC	0.056241667	0.007949196
GO:0045472	response to ether	BP	0.056245855	0.001671894
GO:0002363	alpha-beta T cell lineage commitment	BP	0.056296217	0.003800198
GO:0004052	arachidonate 12-lipoxygenase activity	MF	0.056299332	0.000219063
GO:0060664	epithelial cell proliferation involved in salivary gland morphogenesis	BP	0.056656496	6.03E-06
GO:0043299	leukocyte degranulation	BP	0.0566676	0.014782422
GO:0042374	phylloquinone metabolic process	BP	0.056727368	0.004471596
GO:0042376	phylloquinone catabolic process	BP	0.056727368	0.004471596
GO:1901662	quinone catabolic process	BP	0.056727368	0.004471596
GO:0033292	T-tubule organization	BP	0.056774087	2.65E-06
GO:0048010	vascular endothelial growth factor receptor signaling pathway	BP	0.056777616	0.003276857
GO:0098657	import into cell	BP	0.05678065	0.107705214
GO:0070891	lipoteichoic acid binding	MF	0.056846504	3.20E-07
GO:0035259	glucocorticoid receptor binding	MF	0.056886831	0.000767612
GO:0098760	response to interleukin-7	BP	0.057109654	0.308895889
GO:0098761	cellular response to interleukin-7	BP	0.057109654	0.308895889
GO:0044463	cell projection part	CC	0.057109806	0.033721352
GO:0120038	plasma membrane bounded cell projection part	CC	0.057109806	0.033721352
GO:0030071	regulation of mitotic metaphase/anaphase transition	BP	0.057184363	0.985239717
GO:0000118	histone deacetylase complex	CC	0.057254048	0.003382051
GO:1990418	response to insulin-like growth factor stimulus	BP	0.057664808	0.009251641
GO:0043621	protein self-association	MF	0.057725032	2.95E-06
GO:0006421	asparaginyl-tRNA aminoacylation	BP	0.057809883	1.24E-05
GO:0042053	regulation of dopamine metabolic process	BP	0.057835794	0.000549508
GO:0042069	regulation of catecholamine metabolic process	BP	0.057835794	0.000549508
GO:0015936	coenzyme A metabolic process	BP	0.057876238	0.009101108
GO:0043039	tRNA aminoacylation	BP	0.05808262	0.000798544
GO:0046716	muscle cell cellular homeostasis	BP	0.058146606	0.000894015
GO:0097470	ribbon synapse	CC	0.058234305	4.15E-05
GO:0005313	L-glutamate transmembrane transporter activity	MF	0.058257485	6.60E-05
GO:0015172	acidic amino acid transmembrane transporter activity	MF	0.058257485	6.60E-05
GO:0043025	neuronal cell body	CC	0.058264245	0.003159359
GO:0098814	spontaneous synaptic transmission	BP	0.05836207	0.005110683
GO:1990234	transferase complex	CC	0.058555865	0.005147536
GO:0005862	muscle thin filament tropomyosin	CC	0.058696225	0.003186457
GO:0051654	establishment of mitochondrion localization	BP	0.058728461	0.114154382
GO:0042626	ATPase activity, coupled to transmembrane movement of substances	MF	0.05876391	1.89E-05
GO:0031595	nuclear proteasome complex	CC	0.058775254	7.97E-05
GO:0010737	protein kinase A signaling	BP	0.058803475	3.92E-06
GO:0015929	hexosaminidase activity	MF	0.058914221	0.011223022
GO:0016774	phosphotransferase activity, carboxyl group as acceptor	MF	0.05892463	0.013863426
GO:1903580	positive regulation of ATP metabolic process	BP	0.058935682	0.002549508
GO:0070097	delta-catenin binding	MF	0.058943189	0.037016773
GO:0046390	ribose phosphate biosynthetic process	BP	0.058950838	0.010859542
GO:0000041	transition metal ion transport	BP	0.05903723	0.009645948
GO:0042134	rRNA primary transcript binding	MF	0.059051591	0.001433865
GO:0031054	pre-miRNA processing	BP	0.05924147	0.00333671
GO:0017016	Ras GTPase binding	MF	0.059429881	0.269715113
GO:0044447	axoneme part	CC	0.059442469	0.242026908
GO:0045841	negative regulation of mitotic metaphase/anaphase transition	BP	0.059457755	0.492296105
GO:0002639	positive regulation of immunoglobulin production	BP	0.059471665	0.727330324
GO:0010647	positive regulation of cell communication	BP	0.05949112	0.49431209
GO:0090140	regulation of mitochondrial fission	BP	0.059525633	0.001429371
GO:0004597	peptide-aspartate beta-dioxygenase activity	MF	0.05956033	9.40E-05
GO:0016239	positive regulation of macroautophagy	BP	0.059667518	0.007045005
GO:0098562	cytoplasmic side of membrane	CC	0.059922522	0.000670982
GO:0050855	regulation of B cell receptor signaling pathway	BP	0.059950787	0.038605393
GO:0015722	canalicular bile acid transport	BP	0.059965691	2.53E-06
GO:0000103	sulfate assimilation	BP	0.060017091	0.001695905
GO:1905661	regulation of telomerase RNA reverse transcriptase activity	BP	0.060081828	0.005411625
GO:0010970	transport along microtubule	BP	0.06013754	0.022666968
GO:0099111	microtubule-based transport	BP	0.06013754	0.022666968
GO:0033045	regulation of sister chromatid segregation	BP	0.060226196	0.00114943
GO:0008540	proteasome regulatory particle, base subcomplex	CC	0.060294964	0.00047752
GO:0061517	macrophage proliferation	BP	0.060414952	0.016869408
GO:0061518	microglial cell proliferation	BP	0.060414952	0.016869408
GO:0051444	negative regulation of ubiquitin-protein transferase activity	BP	0.060445815	3.55E-05
GO:0032970	regulation of actin filament-based process	BP	0.060496795	5.12E-05
GO:0060574	intestinal epithelial cell maturation	BP	0.060510724	8.24E-06
GO:0004882	androgen receptor activity	MF	0.060520898	0.00029023
GO:0048294	negative regulation of isotype switching to IgE isotypes	BP	0.060536596	0.009727699
GO:0061304	retinal blood vessel morphogenesis	BP	0.060640028	1.11E-05
GO:0002378	immunoglobulin biosynthetic process	BP	0.060677893	0.000272077
GO:0032633	interleukin-4 production	BP	0.060824149	0.003966781
GO:0033387	putrescine biosynthetic process from ornithine	BP	0.06082943	4.85E-06
GO:0031997	N-terminal myristoylation domain binding	MF	0.060829868	6.17E-06
GO:0044502	positive regulation of signal transduction in other organism	BP	0.060829868	6.17E-06
GO:0052470	modulation by host of symbiont signal transduction pathway	BP	0.060829868	6.17E-06
GO:0052525	positive regulation by host of symbiont signal transduction pathway	BP	0.060829868	6.17E-06
GO:0052526	positive regulation by organism of signal transduction in other organism involved in symbiotic interaction	BP	0.060829868	6.17E-06
GO:0075205	modulation by host of symbiont cAMP-mediated signal transduction	BP	0.060829868	6.17E-06
GO:0075206	positive regulation by host of symbiont cAMP-mediated signal transduction	BP	0.060829868	6.17E-06
GO:0032545	CURI complex	CC	0.060856227	4.32E-09
GO:0034456	UTP-C complex	CC	0.060856227	4.32E-09
GO:0043412	macromolecule modification	BP	0.060900634	0.043152301
GO:0008593	regulation of Notch signaling pathway	BP	0.060931003	0.009990074
GO:0000814	ESCRT II complex	CC	0.060937182	4.58E-05
GO:0045216	cell-cell junction organization	BP	0.061117144	0.126530952
GO:0038095	Fc-epsilon receptor signaling pathway	BP	0.061167017	0.026724235
GO:0004705	JUN kinase activity	MF	0.061201963	0.315301763
GO:0016909	SAP kinase activity	MF	0.061201963	0.315301763
GO:0002677	negative regulation of chronic inflammatory response	BP	0.061246804	1.05E-05
GO:0008175	tRNA methyltransferase activity	MF	0.061306506	0.030156035
GO:0001536	radial spoke stalk	CC	0.06142217	0.004380876
GO:0006521	regulation of cellular amino acid metabolic process	BP	0.061424369	0.000261282
GO:0034455	t-UTP complex	CC	0.061438653	0.000138818
GO:0099523	presynaptic cytosol	CC	0.061531296	0.979233034
GO:1904636	response to ionomycin	BP	0.061565241	0.000269381
GO:1904637	cellular response to ionomycin	BP	0.061565241	0.000269381
GO:0042995	cell projection	CC	0.061685232	0.091631511
GO:0003332	negative regulation of extracellular matrix constituent secretion	BP	0.061722673	2.36E-08
GO:0046686	response to cadmium ion	BP	0.061755512	7.88E-06
GO:0061740	protein targeting to lysosome involved in chaperone-mediated autophagy	BP	0.061764675	0.015857383
GO:0043903	regulation of symbiosis, encompassing mutualism through parasitism	BP	0.061810404	0.012775384
GO:0030850	prostate gland development	BP	0.061987281	9.23E-07
GO:0090283	regulation of protein glycosylation in Golgi	BP	0.06210982	0.035897167
GO:0038172	interleukin-33-mediated signaling pathway	BP	0.062202256	2.53E-07
GO:0098911	regulation of ventricular cardiac muscle cell action potential	BP	0.062354829	0.000565427
GO:0016401	palmitoyl-CoA oxidase activity	MF	0.062360194	0.002810625
GO:0061073	ciliary body morphogenesis	BP	0.062381475	0.00085874
GO:0090200	positive regulation of release of cytochrome c from mitochondria	BP	0.062539544	0.000120367
GO:0070646	protein modification by small protein removal	BP	0.062678597	0.010000684
GO:0004307	ethanolaminephosphotransferase activity	MF	0.063121885	0.000516256
GO:0072522	purine-containing compound biosynthetic process	BP	0.063131453	0.013140315
GO:0031291	Ran protein signal transduction	BP	0.06320688	1.25E-05
GO:0001951	intestinal D-glucose absorption	BP	0.063272903	0.000167442
GO:1902896	terminal web assembly	BP	0.063272903	0.000167442
GO:0045121	membrane raft	CC	0.063308307	0.006940164
GO:0008334	histone mRNA metabolic process	BP	0.063400932	0.010008052
GO:0043225	ATPase-coupled anion transmembrane transporter activity	MF	0.063420056	2.96E-06
GO:0099133	ATP hydrolysis coupled anion transmembrane transport	BP	0.063420056	2.96E-06
GO:0070291	N-acylethanolamine metabolic process	BP	0.063524878	0.000197092
GO:0005753	mitochondrial proton-transporting ATP synthase complex	CC	0.063630969	0.000362331
GO:0045259	proton-transporting ATP synthase complex	CC	0.063630969	0.000362331
GO:0000276	mitochondrial proton-transporting ATP synthase complex, coupling factor F(o)	CC	0.063637673	0.003013632
GO:0045263	proton-transporting ATP synthase complex, coupling factor F(o)	CC	0.063637673	0.003013632
GO:0042953	lipoprotein transport	BP	0.063715674	1.57E-07
GO:0044872	lipoprotein localization	BP	0.063715674	1.57E-07
GO:0007143	female meiotic nuclear division	BP	0.063770406	0.12160742
GO:0000151	ubiquitin ligase complex	CC	0.063823755	0.002195377
GO:0048039	ubiquinone binding	MF	0.063841526	0.029833514
GO:0007595	lactation	BP	0.063973333	0.005833825
GO:0003012	muscle system process	BP	0.064025056	0.010268004
GO:0035845	photoreceptor cell outer segment organization	BP	0.064044209	1.44E-06
GO:0015800	acidic amino acid transport	BP	0.064144502	0.003987692
GO:0044794	positive regulation by host of viral process	BP	0.06417421	1.34E-06
GO:0019087	transformation of host cell by virus	BP	0.064198386	0.007745159
GO:0032989	cellular component morphogenesis	BP	0.064383791	0.171451682
GO:0045684	positive regulation of epidermis development	BP	0.064411526	8.29E-05
GO:0051348	negative regulation of transferase activity	BP	0.064565243	0.006954466
GO:0060168	positive regulation of adenosine receptor signaling pathway	BP	0.064605659	0.000253156
GO:0000145	exocyst	CC	0.064758858	0.139976323
GO:0045662	negative regulation of myoblast differentiation	BP	0.064864401	1.11E-06
GO:0002360	T cell lineage commitment	BP	0.064907967	0.000795253
GO:0031526	brush border membrane	CC	0.064927664	0.00038636
GO:0045056	transcytosis	BP	0.064951556	1.79E-06
GO:0000086	G2/M transition of mitotic cell cycle	BP	0.064995399	0.000835301
GO:0061980	regulatory RNA binding	MF	0.065436126	0.002617646
GO:0046128	purine ribonucleoside metabolic process	BP	0.065570116	0.000472968
GO:0071641	negative regulation of macrophage inflammatory protein 1 alpha production	BP	0.065743746	0.012868886
GO:0030132	clathrin coat of coated pit	CC	0.065822879	0.028427013
GO:0002066	columnar/cuboidal epithelial cell development	BP	0.066065706	0.000689097
GO:0072350	tricarboxylic acid metabolic process	BP	0.066195899	0.018117292
GO:0031331	positive regulation of cellular catabolic process	BP	0.066255456	0.012846593
GO:0030072	peptide hormone secretion	BP	0.066387477	0.014476808
GO:0097332	response to antipsychotic drug	BP	0.066511406	2.81E-05
GO:0001938	positive regulation of endothelial cell proliferation	BP	0.066559023	0.041704495
GO:0005683	U7 snRNP	CC	0.066654336	4.47E-05
GO:1904761	negative regulation of myofibroblast differentiation	BP	0.066704723	0.001309723
GO:1904659	glucose transmembrane transport	BP	0.066828589	0.075919985
GO:0034982	mitochondrial protein processing	BP	0.066847548	0.001202365
GO:0061945	regulation of protein K48-linked ubiquitination	BP	0.066852484	0.001057808
GO:0008240	tripeptidyl-peptidase activity	MF	0.066889565	3.94E-05
GO:0008173	RNA methyltransferase activity	MF	0.066923176	0.020444637
GO:0035459	cargo loading into vesicle	BP	0.067073412	0.000314485
GO:0043038	amino acid activation	BP	0.067086133	0.000661538
GO:0043488	regulation of mRNA stability	BP	0.067230247	0.006084733
GO:0061817	endoplasmic reticulum-plasma membrane tethering	BP	0.067439392	5.80E-05
GO:0008134	transcription factor binding	MF	0.067576124	0.010002333
GO:0048608	reproductive structure development	BP	0.06759631	0.440049515
GO:0060935	cardiac fibroblast cell differentiation	BP	0.06763808	8.54E-06
GO:0060936	cardiac fibroblast cell development	BP	0.06763808	8.54E-06
GO:0060938	epicardium-derived cardiac fibroblast cell differentiation	BP	0.06763808	8.54E-06
GO:0060939	epicardium-derived cardiac fibroblast cell development	BP	0.06763808	8.54E-06
GO:0051251	positive regulation of lymphocyte activation	BP	0.067651174	0.05038958
GO:0045185	maintenance of protein location	BP	0.067712866	3.18E-05
GO:0002200	somatic diversification of immune receptors	BP	0.067786197	0.000328544
GO:1903599	positive regulation of autophagy of mitochondrion	BP	0.06782643	5.87E-08
GO:0030810	positive regulation of nucleotide biosynthetic process	BP	0.067846148	0.002424584
GO:1900373	positive regulation of purine nucleotide biosynthetic process	BP	0.067846148	0.002424584
GO:0009449	gamma-aminobutyric acid biosynthetic process	BP	0.06802855	1.13E-06
GO:0016675	oxidoreductase activity, acting on a heme group of donors	MF	0.068098513	1.93E-05
GO:0070242	thymocyte apoptotic process	BP	0.068254099	0.000261234
GO:0005911	cell-cell junction	CC	0.068288939	0.290940149
GO:0021879	forebrain neuron differentiation	BP	0.068380803	0.00039318
GO:0005776	autophagosome	CC	0.068542218	0.002958336
GO:0001927	exocyst assembly	BP	0.068602274	0.000767571
GO:0032155	cell division site part	CC	0.0687544	0.005398303
GO:0010948	negative regulation of cell cycle process	BP	0.068776636	0.034972553
GO:0050265	RNA uridylyltransferase activity	MF	0.068843335	0.00023992
GO:1905651	regulation of artery morphogenesis	BP	0.068847046	0.001911998
GO:1905653	positive regulation of artery morphogenesis	BP	0.068847046	0.001911998
GO:0002274	myeloid leukocyte activation	BP	0.068911035	0.455215792
GO:0018126	protein hydroxylation	BP	0.068922817	0.117634391
GO:1902822	regulation of late endosome to lysosome transport	BP	0.068943903	1.30E-07
GO:0021564	vagus nerve development	BP	0.069040735	3.91E-05
GO:0005509	calcium ion binding	MF	0.069121642	0.005059962
GO:2000816	negative regulation of mitotic sister chromatid separation	BP	0.069131028	0.611028808
GO:1902100	negative regulation of metaphase/anaphase transition of cell cycle	BP	0.069131028	0.538214572
GO:0086070	SA node cell to atrial cardiac muscle cell communication	BP	0.069170348	1.54E-05
GO:1902339	positive regulation of apoptotic process involved in morphogenesis	BP	0.069170817	0.000508438
GO:1904747	positive regulation of apoptotic process involved in development	BP	0.069170817	0.000508438
GO:0002829	negative regulation of type 2 immune response	BP	0.069199575	0.002175262
GO:0065008	regulation of biological quality	BP	0.069331812	0.250661939
GO:0030175	filopodium	CC	0.069346887	0.444936176
GO:0042335	cuticle development	BP	0.069368671	0.316395621
GO:0072092	ureteric bud invasion	BP	0.069507636	2.20E-05
GO:0004698	calcium-dependent protein kinase C activity	MF	0.069547636	0.001543365
GO:0071139	resolution of recombination intermediates	BP	0.06976872	0.021635681
GO:0010001	glial cell differentiation	BP	0.069804756	5.57E-05
GO:1902231	positive regulation of intrinsic apoptotic signaling pathway in response to DNA damage	BP	0.0698133	0.011221336
GO:0006776	vitamin A metabolic process	BP	0.069865522	8.12E-06
GO:2001241	positive regulation of extrinsic apoptotic signaling pathway in absence of ligand	BP	0.069891818	0.000540568
GO:0097447	dendritic tree	CC	0.069910708	0.001280398
GO:0140035	ubiquitination-like modification-dependent protein binding	MF	0.069954907	0.002900916
GO:0140036	ubiquitin-dependent protein binding	MF	0.069954907	0.002900916
GO:0006493	protein O-linked glycosylation	BP	0.069959527	0.00936156
GO:0033046	negative regulation of sister chromatid segregation	BP	0.070101653	0.438803897
GO:0044282	small molecule catabolic process	BP	0.070146035	0.00508568
GO:0097305	response to alcohol	BP	0.070171145	0.141935764
GO:1903900	regulation of viral life cycle	BP	0.070173589	0.006823803
GO:1901576	organic substance biosynthetic process	BP	0.070589601	0.023825218
GO:0060737	prostate gland morphogenetic growth	BP	0.070604256	5.32E-05
GO:0070649	formin-nucleated actin cable assembly	BP	0.070726586	6.52E-05
GO:0110009	formin-nucleated actin cable organization	BP	0.070726586	6.52E-05
GO:0006627	protein processing involved in protein targeting to mitochondrion	BP	0.070746861	0.00301754
GO:0035437	maintenance of protein localization in endoplasmic reticulum	BP	0.070850098	3.59E-07
GO:0045582	positive regulation of T cell differentiation	BP	0.070872749	0.072866246
GO:0032452	histone demethylase activity	MF	0.071122039	0.004008179
GO:0008088	axo-dendritic transport	BP	0.07113577	0.001982119
GO:0006729	tetrahydrobiopterin biosynthetic process	BP	0.071226906	1.71E-05
GO:0046146	tetrahydrobiopterin metabolic process	BP	0.071226906	1.71E-05
GO:0007043	cell-cell junction assembly	BP	0.071245197	0.19379679
GO:0086067	AV node cell to bundle of His cell communication	BP	0.071361366	0.004793254
GO:0002102	podosome	CC	0.071529607	0.000728965
GO:1901293	nucleoside phosphate biosynthetic process	BP	0.071676755	0.013340361
GO:0045505	dynein intermediate chain binding	MF	0.071682639	0.000423393
GO:0031325	positive regulation of cellular metabolic process	BP	0.071734515	0.067688623
GO:0038128	ERBB2 signaling pathway	BP	0.07177133	0.022886073
GO:0005606	laminin-1 complex	CC	0.07179793	0.002193089
GO:0051651	maintenance of location in cell	BP	0.071824355	1.96E-05
GO:0044326	dendritic spine neck	CC	0.072037476	0.008265721
GO:0021872	forebrain generation of neurons	BP	0.072091546	0.000169819
GO:0102485	dATP phosphohydrolase activity	MF	0.072155075	0.000216029
GO:0102486	dCTP phosphohydrolase activity	MF	0.072155075	0.000216029
GO:0102487	dUTP phosphohydrolase activity	MF	0.072155075	0.000216029
GO:0102488	dTTP phosphohydrolase activity	MF	0.072155075	0.000216029
GO:0102489	GTP phosphohydrolase activity	MF	0.072155075	0.000216029
GO:0102490	8-oxo-dGTP phosphohydrolase activity	MF	0.072155075	0.000216029
GO:0102491	dGTP phosphohydrolase activity	MF	0.072155075	0.000216029
GO:0033017	sarcoplasmic reticulum membrane	CC	0.072213916	0.000234791
GO:0001836	release of cytochrome c from mitochondria	BP	0.072358125	0.003594994
GO:0046719	regulation by virus of viral protein levels in host cell	BP	0.072399468	2.66E-05
GO:0045921	positive regulation of exocytosis	BP	0.072412946	0.000419967
GO:0055076	transition metal ion homeostasis	BP	0.072448845	0.000113522
GO:0005310	dicarboxylic acid transmembrane transporter activity	MF	0.072589454	0.001446808
GO:1902416	positive regulation of mRNA binding	BP	0.072623956	0.000120789
GO:0021675	nerve development	BP	0.072630044	0.001358958
GO:0019637	organophosphate metabolic process	BP	0.072634664	0.016066126
GO:0015980	energy derivation by oxidation of organic compounds	BP	0.072683121	0.002588937
GO:0031968	organelle outer membrane	CC	0.07271019	0.005004236
GO:0071372	cellular response to follicle-stimulating hormone stimulus	BP	0.072757367	5.53E-06
GO:0002177	manchette	CC	0.072795267	0.000610291
GO:0009218	pyrimidine ribonucleotide metabolic process	BP	0.072816629	0.002163369
GO:0043194	axon initial segment	CC	0.072871079	4.03E-05
GO:0002431	Fc receptor mediated stimulatory signaling pathway	BP	0.072872971	0.000168142
GO:1905167	positive regulation of lysosomal protein catabolic process	BP	0.072923095	5.06E-06
GO:0021538	epithalamus development	BP	0.072928532	0.017413999
GO:0021986	habenula development	BP	0.072928532	0.017413999
GO:1902099	regulation of metaphase/anaphase transition of cell cycle	BP	0.072997645	0.923225222
GO:0043369	CD4-positive or CD8-positive, alpha-beta T cell lineage commitment	BP	0.073051928	0.007300867
GO:0032495	response to muramyl dipeptide	BP	0.073177527	0.000616521
GO:0051304	chromosome separation	BP	0.073190136	0.354441702
GO:1990074	polyuridylation-dependent mRNA catabolic process	BP	0.073271872	0.0875883
GO:0070243	regulation of thymocyte apoptotic process	BP	0.073354472	9.12E-09
GO:0005819	spindle	CC	0.073364558	0.000803443
GO:0060548	negative regulation of cell death	BP	0.073425694	0.158628804
GO:0030036	actin cytoskeleton organization	BP	0.073432512	0.166460367
GO:0010499	proteasomal ubiquitin-independent protein catabolic process	BP	0.073452124	0.005215216
GO:1905050	positive regulation of metallopeptidase activity	BP	0.07349356	0.000545943
GO:0060002	plus-end directed microfilament motor activity	MF	0.073505285	0.000184355
GO:0051428	peptide hormone receptor binding	MF	0.073629439	3.15E-06
GO:0044291	cell-cell contact zone	CC	0.073669486	0.002807287
GO:0010526	negative regulation of transposition, RNA-mediated	BP	0.073682957	0.000442276
GO:1990851	Wnt-Frizzled-LRP5/6 complex	CC	0.073710858	0.001222933
GO:0015321	sodium-dependent phosphate transmembrane transporter activity	MF	0.073745121	0.002725979
GO:0009109	coenzyme catabolic process	BP	0.073760511	0.001845696
GO:0008821	crossover junction endodeoxyribonuclease activity	MF	0.074085323	0.010234532
GO:0002903	negative regulation of B cell apoptotic process	BP	0.074098082	0.356066552
GO:0046755	viral budding	BP	0.074379934	8.20E-05
GO:0006213	pyrimidine nucleoside metabolic process	BP	0.074619971	0.00307691
GO:0034351	negative regulation of glial cell apoptotic process	BP	0.074700574	0.000432165
GO:0051188	cofactor biosynthetic process	BP	0.074730384	0.005871512
GO:0034329	cell junction assembly	BP	0.074810698	0.840932567
GO:2000137	negative regulation of cell proliferation involved in heart morphogenesis	BP	0.074868471	6.99E-06
GO:0043624	cellular protein complex disassembly	BP	0.075022597	0.002130991
GO:0030158	protein xylosyltransferase activity	MF	0.075027504	0.000482167
GO:0015630	microtubule cytoskeleton	CC	0.075028867	0.01291655
GO:0048304	positive regulation of isotype switching to IgG isotypes	BP	0.075045372	0.000142452
GO:0000790	nuclear chromatin	CC	0.075289694	0.008253095
GO:0010259	multicellular organism aging	BP	0.075437942	1.00E-06
GO:0008406	gonad development	BP	0.075676221	0.318523328
GO:0002188	translation reinitiation	BP	0.075766606	0.003591666
GO:0048403	brain-derived neurotrophic factor binding	MF	0.075853973	1.65E-06
GO:0017158	regulation of calcium ion-dependent exocytosis	BP	0.075967598	0.044910406
GO:0032703	negative regulation of interleukin-2 production	BP	0.076128706	0.001863669
GO:1903749	positive regulation of establishment of protein localization to mitochondrion	BP	0.076410853	0.006787605
GO:0032532	regulation of microvillus length	BP	0.076444513	3.51E-05
GO:0016004	phospholipase activator activity	MF	0.076458087	1.76E-09
GO:0061364	apoptotic process involved in luteolysis	BP	0.076517644	0.000401845
GO:0010971	positive regulation of G2/M transition of mitotic cell cycle	BP	0.076915573	0.211193761
GO:0000775	chromosome, centromeric region	CC	0.077108708	0.010836583
GO:0009158	ribonucleoside monophosphate catabolic process	BP	0.077172853	0.001314845
GO:0009169	purine ribonucleoside monophosphate catabolic process	BP	0.077172853	0.001314845
GO:2000811	negative regulation of anoikis	BP	0.077182428	4.11E-05
GO:0061458	reproductive system development	BP	0.077227659	0.337128924
GO:0031929	TOR signaling	BP	0.077436458	0.002959665
GO:1903251	multi-ciliated epithelial cell differentiation	BP	0.077443905	4.96E-06
GO:0009636	response to toxic substance	BP	0.077556923	0.01734037
GO:0006334	nucleosome assembly	BP	0.077691753	0.013711755
GO:0034644	cellular response to UV	BP	0.077729271	0.003819443
GO:0042813	Wnt-activated receptor activity	MF	0.077758285	0.002783983
GO:0004535	poly(A)-specific ribonuclease activity	MF	0.077785413	3.31E-05
GO:0010640	regulation of platelet-derived growth factor receptor signaling pathway	BP	0.077845289	0.089595323
GO:0061418	regulation of transcription from RNA polymerase II promoter in response to hypoxia	BP	0.077847974	0.005160333
GO:0002262	myeloid cell homeostasis	BP	0.077956528	0.015061873
GO:0030663	COPI-coated vesicle membrane	CC	0.077966594	0.000550934
GO:0050796	regulation of insulin secretion	BP	0.078033787	0.000496137
GO:0019867	outer membrane	CC	0.078080829	0.005075559
GO:0006766	vitamin metabolic process	BP	0.078099768	0.026307953
GO:0140098	catalytic activity, acting on RNA	MF	0.078106003	0.01115442
GO:0060341	regulation of cellular localization	BP	0.078203527	0.070439559
GO:0061462	protein localization to lysosome	BP	0.078464061	0.000779628
GO:0048872	homeostasis of number of cells	BP	0.078504201	0.006045229
GO:0042117	monocyte activation	BP	0.07865584	0.001037543
GO:0051172	negative regulation of nitrogen compound metabolic process	BP	0.078851652	0.035587845
GO:0008332	low voltage-gated calcium channel activity	MF	0.079005148	0.019997507
GO:0070142	synaptic vesicle budding	BP	0.079019768	5.14E-07
GO:0003192	mitral valve formation	BP	0.079043325	0.021873469
GO:0032984	protein-containing complex disassembly	BP	0.079145807	0.002167083
GO:0032420	stereocilium	CC	0.079162479	0.005331286
GO:0097435	supramolecular fiber organization	BP	0.079189826	0.037895103
GO:0060379	cardiac muscle cell myoblast differentiation	BP	0.079201179	3.66E-06
GO:0097458	neuron part	CC	0.079217757	0.031461951
GO:0042407	cristae formation	BP	0.079252262	0.001338632
GO:0005614	interstitial matrix	CC	0.079356186	0.000128379
GO:0000785	chromatin	CC	0.079391341	0.007321971
GO:0099503	secretory vesicle	CC	0.079433473	0.676208881
GO:0048563	post-embryonic animal organ morphogenesis	BP	0.079484229	0.063842049
GO:0003730	mRNA 3'-UTR binding	MF	0.079599635	0.003133495
GO:0060628	regulation of ER to Golgi vesicle-mediated transport	BP	0.079721212	0.001445205
GO:1905819	negative regulation of chromosome separation	BP	0.079723433	0.77772061
GO:1903019	negative regulation of glycoprotein metabolic process	BP	0.079761581	0.163177614
GO:0006338	chromatin remodeling	BP	0.079812716	0.009159592
GO:0060416	response to growth hormone	BP	0.079879784	0.147812801
GO:0008310	single-stranded DNA 3'-5' exodeoxyribonuclease activity	MF	0.079958047	1.21E-05
GO:0051985	negative regulation of chromosome segregation	BP	0.079975518	0.506072117
GO:0009058	biosynthetic process	BP	0.080023089	0.024706555
GO:0038110	interleukin-2-mediated signaling pathway	BP	0.080144404	0.290891475
GO:0016863	intramolecular oxidoreductase activity, transposing C=C bonds	MF	0.080271632	8.89E-07
GO:0006418	tRNA aminoacylation for protein translation	BP	0.080347305	0.002125379
GO:0006281	DNA repair	BP	0.080350695	0.009015688
GO:0051050	positive regulation of transport	BP	0.080649738	0.684180438
GO:0002474	antigen processing and presentation of peptide antigen via MHC class I	BP	0.080660828	2.91E-05
GO:1903421	regulation of synaptic vesicle recycling	BP	0.080668139	0.001569842
GO:0090276	regulation of peptide hormone secretion	BP	0.080751547	1.43E-06
GO:0005635	nuclear envelope	CC	0.080757858	0.006821754
GO:0031304	intrinsic component of mitochondrial inner membrane	CC	0.08076006	8.61E-05
GO:0031305	integral component of mitochondrial inner membrane	CC	0.08076006	8.61E-05
GO:2001233	regulation of apoptotic signaling pathway	BP	0.080796812	0.004541009
GO:0060840	artery development	BP	0.080911677	5.38E-06
GO:1901990	regulation of mitotic cell cycle phase transition	BP	0.080912036	0.017374183
GO:1901658	glycosyl compound catabolic process	BP	0.080949855	0.352802867
GO:0015985	energy coupled proton transport, down electrochemical gradient	BP	0.081084161	0.001420891
GO:0015986	ATP synthesis coupled proton transport	BP	0.081084161	0.001420891
GO:1902914	regulation of protein polyubiquitination	BP	0.081213453	0.07457559
GO:0051602	response to electrical stimulus	BP	0.081299835	0.376500177
GO:0070777	D-aspartate transport	BP	0.081354292	9.62E-06
GO:0070779	D-aspartate import across plasma membrane	BP	0.081354292	9.62E-06
GO:1905165	regulation of lysosomal protein catabolic process	BP	0.081364958	5.40E-06
GO:0070852	cell body fiber	CC	0.081404991	0.004591532
GO:0050861	positive regulation of B cell receptor signaling pathway	BP	0.081446227	0.000104288
GO:0036297	interstrand cross-link repair	BP	0.081549745	0.002368181
GO:0006120	mitochondrial electron transport, NADH to ubiquinone	BP	0.081941666	0.002480731
GO:0006893	Golgi to plasma membrane transport	BP	0.082023541	0.009736188
GO:0071044	histone mRNA catabolic process	BP	0.082051733	0.006435893
GO:0045292	mRNA cis splicing, via spliceosome	BP	0.082078403	0.000731735
GO:0008180	COP9 signalosome	CC	0.08208079	0.000973615
GO:0030315	T-tubule	CC	0.082082002	1.03E-08
GO:0060442	branching involved in prostate gland morphogenesis	BP	0.082195078	1.54E-10
GO:0070507	regulation of microtubule cytoskeleton organization	BP	0.082292272	0.032751107
GO:0031082	BLOC complex	CC	0.082350808	0.010181319
GO:0046661	male sex differentiation	BP	0.082366777	0.00945429
GO:0000278	mitotic cell cycle	BP	0.082378832	0.012917605
GO:0043029	T cell homeostasis	BP	0.082400733	0.000579836
GO:0042447	hormone catabolic process	BP	0.082468027	0.008957002
GO:0097067	cellular response to thyroid hormone stimulus	BP	0.082723373	0.003060528
GO:0060742	epithelial cell differentiation involved in prostate gland development	BP	0.082777181	4.95E-07
GO:0001844	protein insertion into mitochondrial membrane involved in apoptotic signaling pathway	BP	0.082783455	0.003451137
GO:0034643	establishment of mitochondrion localization, microtubule-mediated	BP	0.08280184	0.124831852
GO:0047497	mitochondrion transport along microtubule	BP	0.08280184	0.124831852
GO:0051059	NF-kappaB binding	MF	0.083064129	0.00952461
GO:1901096	regulation of autophagosome maturation	BP	0.083113514	0.005199142
GO:0005245	voltage-gated calcium channel activity	MF	0.08335602	0.000828172
GO:0030665	clathrin-coated vesicle membrane	CC	0.083362375	0.000192346
GO:0005741	mitochondrial outer membrane	CC	0.083438725	0.007863053
GO:2000601	positive regulation of Arp2/3 complex-mediated actin nucleation	BP	0.083547401	4.18E-05
GO:0045839	negative regulation of mitotic nuclear division	BP	0.083550359	0.10554011
GO:0009165	nucleotide biosynthetic process	BP	0.083659009	0.012971538
GO:0006195	purine nucleotide catabolic process	BP	0.083685758	0.060270449
GO:0030425	dendrite	CC	0.083737964	0.001505601
GO:0051493	regulation of cytoskeleton organization	BP	0.083797918	0.004355951
GO:0000904	cell morphogenesis involved in differentiation	BP	0.083999345	0.008208953
GO:0003256	regulation of transcription from RNA polymerase II promoter involved in myocardial precursor cell differentiation	BP	0.084113201	0.009070421
GO:1904816	positive regulation of protein localization to chromosome, telomeric region	BP	0.084191952	6.37E-06
GO:0051291	protein heterooligomerization	BP	0.084425852	0.002356151
GO:0060687	regulation of branching involved in prostate gland morphogenesis	BP	0.084471323	4.92E-05
GO:0052803	imidazole-containing compound metabolic process	BP	0.084559232	0.000672443
GO:0060525	prostate glandular acinus development	BP	0.08472702	9.47E-06
GO:0006400	tRNA modification	BP	0.084756258	0.003624516
GO:0008150	biological_process	BP	0.084803809	0.532683112
GO:0008090	retrograde axonal transport	BP	0.084831623	6.85E-08
GO:0030893	meiotic cohesin complex	CC	0.084868581	0.020040617
GO:0005223	intracellular cGMP-activated cation channel activity	MF	0.085142413	0.000307029
GO:0002433	immune response-regulating cell surface receptor signaling pathway involved in phagocytosis	BP	0.085224179	0.000108163
GO:0038096	Fc-gamma receptor signaling pathway involved in phagocytosis	BP	0.085224179	0.000108163
GO:0003995	acyl-CoA dehydrogenase activity	MF	0.085262466	0.004100837
GO:2001259	positive regulation of cation channel activity	BP	0.085321867	1.29E-05
GO:0036166	phenotypic switching	BP	0.085480562	2.28E-05
GO:1900239	regulation of phenotypic switching	BP	0.085480562	2.28E-05
GO:0010812	negative regulation of cell-substrate adhesion	BP	0.085483501	0.63334142
GO:0045580	regulation of T cell differentiation	BP	0.08553711	0.002657943
GO:0009893	positive regulation of metabolic process	BP	0.085594329	0.057503218
GO:2000394	positive regulation of lamellipodium morphogenesis	BP	0.085641637	0.002408532
GO:0019856	pyrimidine nucleobase biosynthetic process	BP	0.085696252	0.95546117
GO:0070228	regulation of lymphocyte apoptotic process	BP	0.085736375	0.010644239
GO:0005903	brush border	CC	0.08574206	2.06E-06
GO:0060117	auditory receptor cell development	BP	0.085762969	0.015508524
GO:0099571	postsynaptic cytoskeleton	CC	0.085772523	0.000213048
GO:0005686	U2 snRNP	CC	0.085877135	0.002746052
GO:2001243	negative regulation of intrinsic apoptotic signaling pathway	BP	0.085905667	0.014325062
GO:0051385	response to mineralocorticoid	BP	0.086119149	0.040704881
GO:0051305	chromosome movement towards spindle pole	BP	0.086152279	1.08E-05
GO:1904949	ATPase complex	CC	0.086358286	0.037217348
GO:0099116	tRNA 5'-end processing	BP	0.086390536	0.001146208
GO:1901214	regulation of neuron death	BP	0.0864621	0.179343918
GO:0043900	regulation of multi-organism process	BP	0.086479927	0.124945358
GO:0120025	plasma membrane bounded cell projection	CC	0.086564603	0.080056541
GO:0055085	transmembrane transport	BP	0.086687716	0.006834229
GO:0031010	ISWI-type complex	CC	0.086738471	0.055052215
GO:0030490	maturation of SSU-rRNA	BP	0.086773162	0.000158808
GO:0002260	lymphocyte homeostasis	BP	0.087024728	0.000440783
GO:0010559	regulation of glycoprotein biosynthetic process	BP	0.087065695	0.046202964
GO:0002758	innate immune response-activating signal transduction	BP	0.087142003	0.0556331
GO:0003360	brainstem development	BP	0.087148175	5.89E-08
GO:0070840	dynein complex binding	MF	0.08723193	8.87E-05
GO:0016018	cyclosporin A binding	MF	0.087280267	0.009039177
GO:0051707	response to other organism	BP	0.087310723	0.263546162
GO:0016589	NURF complex	CC	0.087316222	0.000684536
GO:0019080	viral gene expression	BP	0.087455084	0.009841136
GO:0030314	junctional membrane complex	CC	0.08746321	0.001492586
GO:0007548	sex differentiation	BP	0.087502664	0.1757084
GO:0043001	Golgi to plasma membrane protein transport	BP	0.087635715	0.005947054
GO:1901698	response to nitrogen compound	BP	0.087678166	0.102149423
GO:0043902	positive regulation of multi-organism process	BP	0.087841803	0.005232346
GO:0051051	negative regulation of transport	BP	0.088002588	0.060859237
GO:0098712	L-glutamate import across plasma membrane	BP	0.088052808	0.000130838
GO:0006909	phagocytosis	BP	0.088176961	0.000337942
GO:0010390	histone monoubiquitination	BP	0.088205096	0.002143852
GO:1901098	positive regulation of autophagosome maturation	BP	0.088320448	0.000193955
GO:0098845	postsynaptic endosome	CC	0.088589567	0.000713215
GO:0086056	voltage-gated calcium channel activity involved in AV node cell action potential	MF	0.088650562	0.000101977
GO:0000463	maturation of LSU-rRNA from tricistronic rRNA transcript (SSU-rRNA, 5.8S rRNA, LSU-rRNA)	BP	0.088655651	0.020391391
GO:0099003	vesicle-mediated transport in synapse	BP	0.088738992	0.414654702
GO:0021987	cerebral cortex development	BP	0.088794528	0.008791465
GO:0010501	RNA secondary structure unwinding	BP	0.089072747	0.108266173
GO:0043401	steroid hormone mediated signaling pathway	BP	0.089145462	0.031504917
GO:0098797	plasma membrane protein complex	CC	0.089187012	0.001864103
GO:0035385	Roundabout signaling pathway	BP	0.089264687	0.01423697
GO:1903306	negative regulation of regulated secretory pathway	BP	0.089288886	0.115744117
GO:0045069	regulation of viral genome replication	BP	0.089307341	0.005052229
GO:0006513	protein monoubiquitination	BP	0.08936166	0.002078501
GO:0031248	protein acetyltransferase complex	CC	0.089426998	0.006643086
GO:1902493	acetyltransferase complex	CC	0.089426998	0.006643086
GO:0070307	lens fiber cell development	BP	0.089498329	4.56E-05
GO:1903747	regulation of establishment of protein localization to mitochondrion	BP	0.089566701	0.002142237
GO:2000779	regulation of double-strand break repair	BP	0.089615777	9.22E-05
GO:0006289	nucleotide-excision repair	BP	0.089639325	0.008163331
GO:0000226	microtubule cytoskeleton organization	BP	0.089818115	0.18902389
GO:0014912	negative regulation of smooth muscle cell migration	BP	0.089854588	1.39E-06
GO:0043207	response to external biotic stimulus	BP	0.089859598	0.267705567
GO:0098912	membrane depolarization during atrial cardiac muscle cell action potential	BP	0.089902769	0.010278778
GO:0071428	rRNA-containing ribonucleoprotein complex export from nucleus	BP	0.089915457	0.000300363
GO:0051046	regulation of secretion	BP	0.089930222	0.023660866
GO:0006458	'de novo' protein folding	BP	0.090192494	0.007313272
GO:0032870	cellular response to hormone stimulus	BP	0.09020611	0.142924265
GO:0003727	single-stranded RNA binding	MF	0.090211851	0.006891314
GO:0004177	aminopeptidase activity	MF	0.090228728	0.002568429
GO:0019773	proteasome core complex, alpha-subunit complex	CC	0.090335307	0.001511674
GO:0045039	protein import into mitochondrial inner membrane	BP	0.090359134	0.000214089
GO:0003682	chromatin binding	MF	0.090498917	0.01172518
GO:0001554	luteolysis	BP	0.090846358	0.000117034
GO:0030021	extracellular matrix structural constituent conferring compression resistance	MF	0.090900959	0.000423912
GO:0007088	regulation of mitotic nuclear division	BP	0.090916378	0.005793295
GO:0007080	mitotic metaphase plate congression	BP	0.090979761	0.000387517
GO:0031055	chromatin remodeling at centromere	BP	0.091063565	0.007488355
GO:0097718	disordered domain specific binding	MF	0.091175059	5.54E-05
GO:0045577	regulation of B cell differentiation	BP	0.091214955	0.008174654
GO:0045738	negative regulation of DNA repair	BP	0.091513231	0.003840936
GO:0070252	actin-mediated cell contraction	BP	0.091800607	3.94E-08
GO:0031324	negative regulation of cellular metabolic process	BP	0.091834315	0.034539717
GO:0045321	leukocyte activation	BP	0.091885776	0.327576602
GO:0006101	citrate metabolic process	BP	0.09212641	0.01692202
GO:0044322	endoplasmic reticulum quality control compartment	CC	0.092175598	0.152215281
GO:0030658	transport vesicle membrane	CC	0.09223999	7.58E-05
GO:0051775	response to redox state	BP	0.092294485	0.000313259
GO:0070831	basement membrane assembly	BP	0.092310394	0.03270295
GO:0046426	negative regulation of JAK-STAT cascade	BP	0.092418547	0.129438472
GO:0045602	negative regulation of endothelial cell differentiation	BP	0.092517779	0.001557913
GO:0048468	cell development	BP	0.092549886	0.022887075
GO:0050919	negative chemotaxis	BP	0.092553487	8.01E-06
GO:0009967	positive regulation of signal transduction	BP	0.092662327	0.549952616
GO:0051131	chaperone-mediated protein complex assembly	BP	0.092905697	0.000766241
GO:0002753	cytoplasmic pattern recognition receptor signaling pathway	BP	0.092945245	0.048980672
GO:0051173	positive regulation of nitrogen compound metabolic process	BP	0.093043398	0.073058577
GO:0090557	establishment of endothelial intestinal barrier	BP	0.093049255	0.186243594
GO:0044089	positive regulation of cellular component biogenesis	BP	0.093087991	0.005115849
GO:0038094	Fc-gamma receptor signaling pathway	BP	0.093253101	0.000116495
GO:2000194	regulation of female gonad development	BP	0.093311007	0.013624018
GO:0080008	Cul4-RING E3 ubiquitin ligase complex	CC	0.09331356	0.000705948
GO:0010564	regulation of cell cycle process	BP	0.093333267	0.01753665
GO:0032153	cell division site	CC	0.09369437	0.017861731
GO:0008287	protein serine/threonine phosphatase complex	CC	0.093725011	0.031739626
GO:1903293	phosphatase complex	CC	0.093725011	0.031739626
GO:0060371	regulation of atrial cardiac muscle cell membrane depolarization	BP	0.093811788	0.000170147
GO:0070847	core mediator complex	CC	0.093838006	0.000173217
GO:0015450	P-P-bond-hydrolysis-driven protein transmembrane transporter activity	MF	0.094196975	0.002071579
GO:0046622	positive regulation of organ growth	BP	0.094332156	0.000134544
GO:0016614	oxidoreductase activity, acting on CH-OH group of donors	MF	0.094376438	0.013997586
GO:0071900	regulation of protein serine/threonine kinase activity	BP	0.094422187	0.007135617
GO:0043950	positive regulation of cAMP-mediated signaling	BP	0.094515299	1.06E-05
GO:0004966	galanin receptor activity	MF	0.094572493	0.012284413
GO:0010882	regulation of cardiac muscle contraction by calcium ion signaling	BP	0.094761374	0.00119064
GO:0097284	hepatocyte apoptotic process	BP	0.09477045	0.015231387
GO:0030506	ankyrin binding	MF	0.094891853	4.42E-05
GO:0009615	response to virus	BP	0.094901732	0.045225317
GO:0039535	regulation of RIG-I signaling pathway	BP	0.095177006	0.140489275
GO:0042416	dopamine biosynthetic process	BP	0.095218614	0.008465372
GO:0030867	rough endoplasmic reticulum membrane	CC	0.095316009	0.000340238
GO:0072666	establishment of protein localization to vacuole	BP	0.095339251	0.000575973
GO:0032352	positive regulation of hormone metabolic process	BP	0.095349138	0.000534081
GO:0006360	transcription by RNA polymerase I	BP	0.095387167	0.029897347
GO:0002052	positive regulation of neuroblast proliferation	BP	0.095511398	0.002233904
GO:0006283	transcription-coupled nucleotide-excision repair	BP	0.095655966	0.012393208
GO:2000648	positive regulation of stem cell proliferation	BP	0.095713071	0.00089272
GO:0017119	Golgi transport complex	CC	0.095783456	0.000919003
GO:0045787	positive regulation of cell cycle	BP	0.095798033	0.177802477
GO:0030042	actin filament depolymerization	BP	0.095813467	1.20E-06
GO:0007015	actin filament organization	BP	0.096006765	0.002997723
GO:0045931	positive regulation of mitotic cell cycle	BP	0.096097141	0.131099186
GO:0000422	autophagy of mitochondrion	BP	0.096143799	0.001796993
GO:0061726	mitochondrion disassembly	BP	0.096143799	0.001796993
GO:0097211	cellular response to gonadotropin-releasing hormone	BP	0.096252199	2.11E-06
GO:0035563	positive regulation of chromatin binding	BP	0.096557317	0.001021465
GO:0007094	mitotic spindle assembly checkpoint	BP	0.096559948	0.713432116
GO:0031577	spindle checkpoint	BP	0.096559948	0.713432116
GO:0071173	spindle assembly checkpoint	BP	0.096559948	0.713432116
GO:0071174	mitotic spindle checkpoint	BP	0.096559948	0.713432116
GO:0033643	host cell part	CC	0.096687002	0.070344359
GO:1902555	endoribonuclease complex	CC	0.096719018	0.000404665
GO:1905348	endonuclease complex	CC	0.096719018	0.000404665
GO:0035690	cellular response to drug	BP	0.096782403	0.284316972
GO:0043524	negative regulation of neuron apoptotic process	BP	0.096848279	0.937535196
GO:0086012	membrane depolarization during cardiac muscle cell action potential	BP	0.096888169	3.32E-07
GO:0070475	rRNA base methylation	BP	0.096945612	0.003683609
GO:0060348	bone development	BP	0.097052073	0.004461935
GO:0006356	regulation of transcription by RNA polymerase I	BP	0.097109382	0.013371009
GO:0030168	platelet activation	BP	0.097280918	0.017895224
GO:0070296	sarcoplasmic reticulum calcium ion transport	BP	0.097371608	0.000680929
GO:0045943	positive regulation of transcription by RNA polymerase I	BP	0.097517218	0.016833932
GO:0032754	positive regulation of interleukin-5 production	BP	0.097738872	1.60E-05
GO:0042612	MHC class I protein complex	CC	0.09781986	0.001296493
GO:0006235	dTTP biosynthetic process	BP	0.097823613	0.004086282
GO:0009212	pyrimidine deoxyribonucleoside triphosphate biosynthetic process	BP	0.097823613	0.004086282
GO:0046075	dTTP metabolic process	BP	0.097823613	0.004086282
GO:0010257	NADH dehydrogenase complex assembly	BP	0.097841531	0.012758938
GO:0032981	mitochondrial respiratory chain complex I assembly	BP	0.097841531	0.012758938
GO:0000253	3-keto sterol reductase activity	MF	0.097911654	5.39E-05
GO:1903008	organelle disassembly	BP	0.097922598	0.001435383
GO:2000825	positive regulation of androgen receptor activity	BP	0.097971226	1.15E-07
GO:0003810	protein-glutamine gamma-glutamyltransferase activity	MF	0.097974392	0.051922313
GO:0051787	misfolded protein binding	MF	0.09804529	0.170775454
GO:0008324	cation transmembrane transporter activity	MF	0.098051347	0.003165451
GO:0051030	snRNA transport	BP	0.098078457	0.019561139
GO:0044878	mitotic cytokinesis checkpoint	BP	0.098095214	4.59E-06
GO:1905448	positive regulation of mitochondrial ATP synthesis coupled electron transport	BP	0.098128343	0.020636916
GO:0003857	3-hydroxyacyl-CoA dehydrogenase activity	MF	0.098156086	0.008426992
GO:0042558	pteridine-containing compound metabolic process	BP	0.09816107	0.000752523
GO:0046131	pyrimidine ribonucleoside metabolic process	BP	0.098199389	0.005119508
GO:1990726	Lsm1-7-Pat1 complex	CC	0.098326452	0.004123433
GO:0006548	histidine catabolic process	BP	0.098433936	0.01876043
GO:0052805	imidazole-containing compound catabolic process	BP	0.098433936	0.01876043
GO:0071550	death-inducing signaling complex assembly	BP	0.098467298	2.85E-05
GO:0061013	regulation of mRNA catabolic process	BP	0.098589249	0.005368911
GO:0002757	immune response-activating signal transduction	BP	0.09859759	0.031258684
GO:0045579	positive regulation of B cell differentiation	BP	0.09859786	4.94E-07
GO:1903706	regulation of hemopoiesis	BP	0.098628343	0.616278011
GO:0033047	regulation of mitotic sister chromatid segregation	BP	0.098694351	0.021332607
GO:0010716	negative regulation of extracellular matrix disassembly	BP	0.098810684	0.141397502
GO:0016853	isomerase activity	MF	0.098818392	0.003134697
GO:1901292	nucleoside phosphate catabolic process	BP	0.098865595	0.00929077
GO:0018202	peptidyl-histidine modification	BP	0.098948289	2.60E-05
GO:0050873	brown fat cell differentiation	BP	0.098951714	0.10111978
GO:0032026	response to magnesium ion	BP	0.098971587	0.014657497
GO:0009166	nucleotide catabolic process	BP	0.099005268	0.008121695
GO:0022617	extracellular matrix disassembly	BP	0.099025617	0.003180927
GO:0070085	glycosylation	BP	0.099078178	0.063068919
GO:0016577	histone demethylation	BP	0.099091723	0.002298567
GO:0050808	synapse organization	BP	0.099109132	0.002838408
GO:0006528	asparagine metabolic process	BP	0.099116539	0.002722259
GO:0015813	L-glutamate transmembrane transport	BP	0.099164906	0.000331949
GO:0009081	branched-chain amino acid metabolic process	BP	0.099166809	0.009988647
GO:0002227	innate immune response in mucosa	BP	0.099221431	3.48E-13
GO:0001682	tRNA 5'-leader removal	BP	0.099224297	5.55E-05
GO:0099173	postsynapse organization	BP	0.09940433	0.003229436
GO:0002376	immune system process	BP	0.099423159	0.306794095
GO:0045737	positive regulation of cyclin-dependent protein serine/threonine kinase activity	BP	0.099514995	0.007528057
GO:0006302	double-strand break repair	BP	0.099611127	0.008939943
GO:0000104	succinate dehydrogenase activity	MF	0.099831746	2.80E-05
GO:0005749	mitochondrial respiratory chain complex II, succinate dehydrogenase complex (ubiquinone)	CC	0.099831746	2.80E-05
GO:0008177	succinate dehydrogenase (ubiquinone) activity	MF	0.099831746	2.80E-05
GO:0045257	succinate dehydrogenase complex (ubiquinone)	CC	0.099831746	2.80E-05
GO:0045273	respiratory chain complex II	CC	0.099831746	2.80E-05
GO:0045281	succinate dehydrogenase complex	CC	0.099831746	2.80E-05
GO:0045283	fumarate reductase complex	CC	0.099831746	2.80E-05
GO:0006121	mitochondrial electron transport, succinate to ubiquinone	BP	0.099831746	0.000476061
GO:0031400	negative regulation of protein modification process	BP	0.099835568	0.01157381
GO:0006323	DNA packaging	BP	0.099862392	0.017586031
GO:0000123	histone acetyltransferase complex	CC	0.099906977	0.008187341
GO:0090261	positive regulation of inclusion body assembly	BP	0.100003175	0.004334021
GO:0042641	actomyosin	CC	0.100009381	0.011614495
GO:0060251	regulation of glial cell proliferation	BP	0.100018942	9.67E-07
GO:1903772	regulation of viral budding via host ESCRT complex	BP	0.100019719	0.000929108
GO:2000737	negative regulation of stem cell differentiation	BP	0.100166657	0.000807651
GO:0050871	positive regulation of B cell activation	BP	0.100168952	0.190076742
GO:0007219	Notch signaling pathway	BP	0.100205621	0.053259221
GO:0043487	regulation of RNA stability	BP	0.100274443	0.006390294
GO:0004536	deoxyribonuclease activity	MF	0.100382659	0.005624084
GO:0015842	aminergic neurotransmitter loading into synaptic vesicle	BP	0.100406826	0.005389079
GO:0004127	cytidylate kinase activity	MF	0.100407592	0.002106591
GO:0008643	carbohydrate transport	BP	0.100442258	0.973633759
GO:0008305	integrin complex	CC	0.100451981	3.86E-05
GO:0019898	extrinsic component of membrane	CC	0.100519629	0.083309818
GO:0005087	Ran guanyl-nucleotide exchange factor activity	MF	0.100659631	0.135159378
GO:0090596	sensory organ morphogenesis	BP	0.100725256	0.00384133
GO:0004198	calcium-dependent cysteine-type endopeptidase activity	MF	0.10073153	0.279070207
GO:0070530	K63-linked polyubiquitin modification-dependent protein binding	MF	0.100889275	0.006008969
GO:0035909	aorta morphogenesis	BP	0.100905874	3.71E-05
GO:0072520	seminiferous tubule development	BP	0.100930036	2.49E-05
GO:0006621	protein retention in ER lumen	BP	0.101106812	0.000399847
GO:1902229	regulation of intrinsic apoptotic signaling pathway in response to DNA damage	BP	0.10110863	0.016412603
GO:0045955	negative regulation of calcium ion-dependent exocytosis	BP	0.101195034	4.22E-06
GO:0032429	regulation of phospholipase A2 activity	BP	0.10124424	1.71E-09
GO:1901215	negative regulation of neuron death	BP	0.101255303	0.500352249
GO:0005638	lamin filament	CC	0.101324661	0.000319245
GO:0043373	CD4-positive, alpha-beta T cell lineage commitment	BP	0.101416885	0.001413816
GO:0014839	myoblast migration involved in skeletal muscle regeneration	BP	0.10142225	0.000406462
GO:0042611	MHC protein complex	CC	0.101512868	8.68E-06
GO:0033018	sarcoplasmic reticulum lumen	CC	0.101613154	0.245374311
GO:1902749	regulation of cell cycle G2/M phase transition	BP	0.101670383	0.001766522
GO:1903077	negative regulation of protein localization to plasma membrane	BP	0.101731038	0.019232327
GO:0002176	male germ cell proliferation	BP	0.101914784	0.080544887
GO:0036093	germ cell proliferation	BP	0.101914784	0.080544887
GO:1903798	regulation of production of miRNAs involved in gene silencing by miRNA	BP	0.101915276	0.025022851
GO:0072733	response to staurosporine	BP	0.101941011	0.00251272
GO:0072734	cellular response to staurosporine	BP	0.101941011	0.00251272
GO:0000209	protein polyubiquitination	BP	0.101976278	0.016013655
GO:0009725	response to hormone	BP	0.102053702	0.183941578
GO:2001258	negative regulation of cation channel activity	BP	0.102056771	0.000770875
GO:0032616	interleukin-13 production	BP	0.102132438	0.001782237
GO:0032656	regulation of interleukin-13 production	BP	0.102132438	0.001782237
GO:1905451	positive regulation of Fc-gamma receptor signaling pathway involved in phagocytosis	BP	0.102284982	0.024597748
GO:0006152	purine nucleoside catabolic process	BP	0.102498801	3.83E-05
GO:0046130	purine ribonucleoside catabolic process	BP	0.102498801	3.83E-05
GO:0008215	spermine metabolic process	BP	0.102513346	6.86E-06
GO:0007130	synaptonemal complex assembly	BP	0.102518701	0.010054978
GO:0005891	voltage-gated calcium channel complex	CC	0.10253315	3.31E-05
GO:0036100	leukotriene catabolic process	BP	0.102634758	0.003378064
GO:0036101	leukotriene B4 catabolic process	BP	0.102634758	0.003378064
GO:0036102	leukotriene B4 metabolic process	BP	0.102634758	0.003378064
GO:0050051	leukotriene-B4 20-monooxygenase activity	MF	0.102634758	0.003378064
GO:1901523	icosanoid catabolic process	BP	0.102634758	0.003378064
GO:0097413	Lewy body	CC	0.10264853	0.000207872
GO:0009189	deoxyribonucleoside diphosphate biosynthetic process	BP	0.102737779	0.152910648
GO:0019901	protein kinase binding	MF	0.102740925	0.027983605
GO:0031252	cell leading edge	CC	0.10284357	0.11656025
GO:0016435	rRNA (guanine) methyltransferase activity	MF	0.10296014	0.001905487
GO:0009064	glutamine family amino acid metabolic process	BP	0.103075673	3.41E-05
GO:0015740	C4-dicarboxylate transport	BP	0.103186926	0.001084684
GO:1903540	establishment of protein localization to postsynaptic membrane	BP	0.103300106	0.025566291
GO:0009308	amine metabolic process	BP	0.103400942	0.000233761
GO:0035116	embryonic hindlimb morphogenesis	BP	0.103501093	0.009605607
GO:0033089	positive regulation of T cell differentiation in thymus	BP	0.103669239	0.005263045
GO:0010639	negative regulation of organelle organization	BP	0.103679006	0.004765603
GO:0072523	purine-containing compound catabolic process	BP	0.103689622	0.029895798
GO:0043162	ubiquitin-dependent protein catabolic process via the multivesicular body sorting pathway	BP	0.103877743	0.000815275
GO:0005902	microvillus	CC	0.103917681	0.001690067
GO:1903201	regulation of oxidative stress-induced cell death	BP	0.104051111	0.014489141
GO:0007144	female meiosis I	BP	0.104051603	6.84E-06
[truncated: 20,158 more rows]
