# Supplementary material for: LncRNAs induce oxidative stress and spermatogenesis by regulating endoplasmic reticulum genes and pathways
Source: Aging (Albany NY). 2021 May 6;13(10):13764–87. doi: 10.18632/aging.202971 (PMC8202879; doi:10.18632/aging.202971)
Supplement: Supplementary Table 8 [file aging-13-202971-s008.csv]

Supplementary Table 8. KEGG_org_con.
category	pathway	goseq	plage
3010	Ribosome	7.89E-25	3.34E-07
4114	Oocyte meiosis	0.000810115	2.08E-05
280	Valine, leucine and isoleucine degradation	0.001187396	0.0003469
5012	Parkinson disease	0.002725666	0.000133817
4510	Focal adhesion	0.003656105	7.46E-06
4530	Tight junction	0.004661771	0.000833938
5010	Alzheimer disease	0.006432569	0.000102062
3050	Proteasome	0.007688198	7.42E-05
640	Propanoate metabolism	0.009507226	0.000198131
4720	Long-term potentiation	0.010848707	3.16E-06
5016	Huntington disease	0.016619815	0.0002271
71	Fatty acid degradation	0.01779788	7.21E-05
190	Oxidative phosphorylation	0.018140404	0.000207945
4670	Leukocyte transendothelial migration	0.018794999	0.023733587
3040	Spliceosome	0.022320744	0.00208283
3060	Protein export	0.027580785	0.000912415
5130	Pathogenic Escherichia coli infection	0.030211064	2.07E-05
4914	Progesterone-mediated oocyte maturation	0.031817	7.92E-05
4722	Neurotrophin signaling pathway	0.035505038	0.000215791
4910	Insulin signaling pathway	0.037901638	0.000271195
4146	Peroxisome	0.038301008	5.21E-05
5214	Glioma	0.042532396	0.000126
5100	Bacterial invasion of epithelial cells	0.044981627	8.09E-06
630	Glyoxylate and dicarboxylate metabolism	0.046664896	2.38E-06
480	Glutathione metabolism	0.049232674	0.000912879
4666	Fc gamma R-mediated phagocytosis	0.051164626	1.52E-05
2010	ABC transporters	0.051828779	6.97E-05
3018	RNA degradation	0.053933906	0.003712406
5412	Arrhythmogenic right ventricular cardiomyopathy (ARVC)	0.055015443	0.000270518
4012	ErbB signaling pathway	0.056565738	0.000664805
3013	RNA transport	0.07061656	0.001261285
5145	Toxoplasmosis	0.071661932	0.296400291
4612	Antigen processing and presentation	0.071811416	5.28E-05
5223	Non-small cell lung cancer	0.072866394	0.000250223
5212	Pancreatic cancer	0.073047022	0.001215619
4370	VEGF signaling pathway	0.075030907	3.75E-05
650	Butanoate metabolism	0.080851996	0.000228256
4660	T cell receptor signaling pathway	0.086495466	0.000752894
5110	Vibrio cholerae infection	0.086611918	2.05E-07
240	Pyrimidine metabolism	0.088835484	0.000696
4270	Vascular smooth muscle contraction	0.093919128	8.91E-08
4520	Adherens junction	0.095150098	0.000353826
5216	Thyroid cancer	0.099252414	5.54E-05
4320	Dorso-ventral axis formation	0.101284985	5.65E-06
5140	Leishmaniasis	0.112530944	0.107904627
760	Nicotinate and nicotinamide metabolism	0.112742346	0.001185949
4010	MAPK signaling pathway	0.115264757	0.003030628
20	Citrate cycle (TCA cycle)	0.116519545	0.012145012
4145	Phagosome	0.117162736	0.008024293
4930	Type II diabetes mellitus	0.117441021	1.65E-05
5213	Endometrial cancer	0.121566412	0.000234433
4210	Apoptosis	0.121749376	0.008727765
232	Caffeine metabolism	0.139131283	0.000188564
61	Fatty acid biosynthesis	0.141964581	0.019719935
5410	Hypertrophic cardiomyopathy (HCM)	0.142432027	0.000209056
4730	Long-term depression	0.144733978	9.10E-07
5416	Viral myocarditis	0.146911967	0.001040868
1040	Biosynthesis of unsaturated fatty acids	0.156672162	0.02334535
5414	Dilated cardiomyopathy (DCM)	0.161197545	0.000150252
4512	ECM-receptor interaction	0.169286023	0.000415904
5221	Acute myeloid leukemia	0.170256402	0.001714204
4260	Cardiac muscle contraction	0.180520049	5.90E-07
4380	Osteoclast differentiation	0.182097797	0.545253402
5160	Hepatitis C	0.186748411	0.011185878
5120	Epithelial cell signaling in Helicobacter pylori infection	0.18999678	0.101949014
5146	Amoebiasis	0.190091796	0.002332609
670	One carbon pool by folate	0.191767476	0.01621339
531	Glycosaminoglycan degradation	0.200137168	0.016276526
592	alpha-Linolenic acid metabolism	0.210408411	0.000715913
5220	Chronic myeloid leukemia	0.21458369	0.00224125
5014	Amyotrophic lateral sclerosis (ALS)	0.216317278	0.004240822
4912	GnRH signaling pathway	0.226475493	8.16E-05
4020	Calcium signaling pathway	0.231862623	0.001434531
4664	Fc epsilon RI signaling pathway	0.241519313	0.000348985
5222	Small cell lung cancer	0.248297399	0.839000912
5219	Bladder cancer	0.25512793	0.000118478
4144	Endocytosis	0.257670706	0.005982059
4650	Natural killer cell mediated cytotoxicity	0.262087744	0.000828165
5211	Renal cell carcinoma	0.300565617	0.001489203
5142	Chagas disease (American trypanosomiasis)	0.301937537	0.015246683
410	beta-Alanine metabolism	0.309806104	0.000144719
5131	Shigellosis	0.313357065	0.000671586
62	Fatty acid elongation	0.317698649	0.003018715
780	Biotin metabolism	0.320854264	0.007086005
620	Pyruvate metabolism	0.324884108	1.80E-05
4810	Regulation of actin cytoskeleton	0.326680339	0.371475795
72	Synthesis and degradation of ketone bodies	0.328630971	5.75E-05
4110	Cell cycle	0.332119205	0.000516877
4662	B cell receptor signaling pathway	0.351440491	0.006844273
4350	TGF-beta signaling pathway	0.361899483	0.021230904
5200	Pathways in cancer	0.376987526	0.124961713
920	Sulfur metabolism	0.383429272	0.063123631
4622	RIG-I-like receptor signaling pathway	0.389849048	0.269259455
4150	mTOR signaling pathway	0.393765682	0.00501942
4621	NOD-like receptor signaling pathway	0.401306359	0.058106843
5340	Primary immunodeficiency	0.401404823	0.004380223
785	Lipoic acid metabolism	0.40213567	0.002204248
590	Arachidonic acid metabolism	0.402208925	0.008704086
4972	Pancreatic secretion	0.410234318	0.00142186
5330	Allograft rejection	0.412441804	0.009637368
4120	Ubiquitin mediated proteolysis	0.43277582	0.000976146
740	Riboflavin metabolism	0.457966154	2.29E-07
900	Terpenoid backbone biosynthesis	0.465561115	4.56E-05
4141	Protein processing in endoplasmic reticulum	0.465656757	0.009310206
5150	Staphylococcus aureus infection	0.469662	0.0108892
4920	Adipocytokine signaling pathway	0.480632746	0.138428506
330	Arginine and proline metabolism	0.481288047	3.70E-06
340	Histidine metabolism	0.483342384	0.054970218
4514	Cell adhesion molecules (CAMs)	0.490765739	0.008898716
5322	Systemic lupus erythematosus	0.492293927	0.091464628
3008	Ribosome biogenesis in eukaryotes	0.501595215	0.001682698
790	Folate biosynthesis	0.505254543	0.000304471
4062	Chemokine signaling pathway	0.50727964	0.321380042
4310	Wnt signaling pathway	0.522308934	0.032818161
4940	Type I diabetes mellitus	0.531198901	0.047901516
4962	Vasopressin-regulated water reabsorption	0.538946071	0.000316695
3015	mRNA surveillance pathway	0.546825011	0.008468272
3420	Nucleotide excision repair	0.552044691	0.011568636
360	Phenylalanine metabolism	0.560660773	0.012192186
4744	Phototransduction	0.560819835	7.01E-05
4330	Notch signaling pathway	0.574284354	0.000107776
5218	Melanoma	0.574992998	0.517629878
4977	Vitamin digestion and absorption	0.579920444	0.165284357
565	Ether lipid metabolism	0.58362345	0.172935153
5210	Colorectal cancer	0.608587534	0.007143076
5332	Graft-versus-host disease	0.63079627	0.014246177
524	Neomycin, kanamycin and gentamicin biosynthesis	0.633008454	0.000174282
1100	Metabolic pathways	0.637769694	0.003617942
4070	Phosphatidylinositol signaling system	0.643516599	0.027014802
910	Nitrogen metabolism	0.648478851	0.859631995
4130	SNARE interactions in vesicular transport	0.652982192	0.000305039
3020	RNA polymerase	0.655029571	0.018728804
4140	Autophagy - animal	0.663849876	0.000913166
860	Porphyrin and chlorophyll metabolism	0.665804898	0.646199429
750	Vitamin B6 metabolism	0.682985898	0.001304037
5310	Asthma	0.68486542	0.188403933
5215	Prostate cancer	0.685620878	0.001940842
520	Amino sugar and nucleotide sugar metabolism	0.687396155	0.000102052
564	Glycerophospholipid metabolism	0.68810966	0.274189942
120	Primary bile acid biosynthesis	0.702126418	0.060933042
512	Mucin type O-glycan biosynthesis	0.702462496	0.058602146
130	Ubiquinone and other terpenoid-quinone biosynthesis	0.706058672	0.146262954
3320	PPAR signaling pathway	0.708048518	0.948881629
770	Pantothenate and CoA biosynthesis	0.712239609	0.001415092
5320	Autoimmune thyroid disease	0.714856196	0.027611066
4360	Axon guidance	0.71944394	0.000501379
563	Glycosylphosphatidylinositol (GPI)-anchor biosynthesis	0.720378523	0.193691808
4142	Lysosome	0.72269616	0.636923862
4640	Hematopoietic cell lineage	0.728290942	0.004095694
10	Glycolysis / Gluconeogenesis	0.731335907	0.003007353
511	Other glycan degradation	0.747320223	0.299272912
450	Selenocompound metabolism	0.755713831	0.017654698
4710	Circadian rhythm	0.761324124	0.057878798
533	Glycosaminoglycan biosynthesis - keratan sulfate	0.762704226	0.109596075
561	Glycerolipid metabolism	0.769598431	0.243744247
230	Purine metabolism	0.771346592	0.052796311
5020	Prion diseases	0.7752851	0.029734752
140	Steroid hormone biosynthesis	0.785416676	0.156434536
4122	Sulfur relay system	0.797354882	0.192701345
3410	Base excision repair	0.800365047	8.77E-05
510	N-Glycan biosynthesis	0.801540011	0.224009756
4540	Gap junction	0.803944144	0.000884572
53	Ascorbate and aldarate metabolism	0.804077566	0.084533044
4971	Gastric acid secretion	0.808583209	6.94E-05
430	Taurine and hypotaurine metabolism	0.809040371	0.031787841
970	Aminoacyl-tRNA biosynthesis	0.815160183	0.002874268
3022	Basal transcription factors	0.827254135	0.085280428
4966	Collecting duct acid secretion	0.839887086	0.021035583
380	Tryptophan metabolism	0.840810515	0.004799442
4973	Carbohydrate digestion and absorption	0.841157781	0.003844527
534	Glycosaminoglycan biosynthesis - heparan sulfate / heparin	0.841468496	0.089175566
4620	Toll-like receptor signaling pathway	0.851094318	0.858500885
4115	p53 signaling pathway	0.85520961	0.058666664
4970	Salivary secretion	0.855986097	0.000438239
4976	Bile secretion	0.8562238	0.002175482
290	Valine, leucine and isoleucine biosynthesis	0.858386542	0.008547002
4960	Aldosterone-regulated sodium reabsorption	0.859419364	0.236790833
3030	DNA replication	0.862024301	0.004642459
310	Lysine degradation	0.862857628	0.004071883
5143	African trypanosomiasis	0.864730486	0.013115059
591	Linoleic acid metabolism	0.870183581	0.010912391
270	Cysteine and methionine metabolism	0.870643344	0.00015091
4916	Melanogenesis	0.885139918	0.000441777
514	Other types of O-glycan biosynthesis	0.89558671	0.084826339
350	Tyrosine metabolism	0.89635102	0.067318957
4964	Proximal tubule bicarbonate reclamation	0.89923235	0.04715545
562	Inositol phosphate metabolism	0.899919734	0.053389706
4950	Maturity onset diabetes of the young	0.903656374	0.11899719
4630	JAK-STAT signaling pathway	0.905642418	0.02972568
830	Retinol metabolism	0.906246665	0.033574416
532	Glycosaminoglycan biosynthesis - chondroitin sulfate / dermatan sulfate	0.907518304	0.06548139
40	Pentose and glucuronate interconversions	0.912877067	0.228260445
260	Glycine, serine and threonine metabolism	0.921779921	5.99E-06
3450	Non-homologous end-joining	0.924825267	0.010772102
603	Glycosphingolipid biosynthesis - globo and isoglobo series	0.927197585	0.546596528
250	Alanine, aspartate and glutamate metabolism	0.928433139	0.019344431
4974	Protein digestion and absorption	0.937610391	0.00386141
4623	Cytosolic DNA-sensing pathway	0.940381504	0.696667147
980	Metabolism of xenobiotics by cytochrome P450	0.941684801	0.092129631
600	Sphingolipid metabolism	0.94502246	0.178953736
52	Galactose metabolism	0.947865606	0.068573994
4614	Renin-angiotensin system	0.949667672	0.006059577
982	Drug metabolism - cytochrome P450	0.949733568	0.07308077
983	Drug metabolism - other enzymes	0.955502216	0.943636322
3440	Homologous recombination	0.958169977	0.617592425
51	Fructose and mannose metabolism	0.958457333	6.79E-05
5323	Rheumatoid arthritis	0.958979898	0.030892755
4672	Intestinal immune network for IgA production	0.968330447	0.018395619
4340	Hedgehog signaling pathway	0.974945089	0.001451117
500	Starch and sucrose metabolism	0.981660805	0.151796375
601	Glycosphingolipid biosynthesis - lacto and neolacto series	0.983242396	0.041357191
3430	Mismatch repair	0.986384691	0.002778883
4742	Taste transduction	0.988899519	0.008236958
30	Pentose phosphate pathway	0.989151852	0.496038069
4975	Fat digestion and absorption	0.991064432	0.153950088
5144	Malaria	0.992669816	0.034158718
4610	Complement and coagulation cascades	0.992820706	0.013943933
4060	Cytokine-cytokine receptor interaction	0.994895636	0.015086573
5217	Basal cell carcinoma	0.998915548	0.01763057
4080	Neuroactive ligand-receptor interaction	0.999996143	0.018910674
4740	Olfactory transduction	0.999999833	0.167222767
300	Lysine biosynthesis	1	0.076601363
472	D-Arginine and D-ornithine metabolism	1	1
400	Phenylalanine, tyrosine and tryptophan biosynthesis	1	3.24E-06
100	Steroid biosynthesis	1	0.081189382
460	Cyanoamino acid metabolism	1	0.436444577
604	Glycosphingolipid biosynthesis - ganglio series	1	0.249246242
471	D-Glutamine and D-glutamate metabolism	1	0.074531587
730	Thiamine metabolism	1	0.607994867
