# Supplementary material for: LncRNAs induce oxidative stress and spermatogenesis by regulating endoplasmic reticulum genes and pathways
Source: Aging (Albany NY). 2021 May 6;13(10):13764–87. doi: 10.18632/aging.202971 (PMC8202879; doi:10.18632/aging.202971)
Supplement: Supplementary Table 9 [file aging-13-202971-s009.csv]

Supplementary Table 9. TOP_correlation_network.
Var1	Var2	value
lnc-AP3S1-15	A1BG	-0.715784607
lnc-CDK12-2	A1BG	-0.735607148
lnc-CSNK1A1-7	A1BG	-0.695378116
lnc-EEF1B2-3	A1BG	-0.740524957
lnc-FOXN1-1	A1BG	-0.697335742
lnc-GNS-3	A1BG	-0.732230975
lnc-IL31RA-1	A1BG	-0.717395826
lnc-KB-1980E6.3.1-6	A1BG	-0.841328045
lnc-LAT2-2	A1BG	-0.748512935
lnc-LRRC38-2	A1BG	-0.694423482
lnc-PHLDB1-1	A1BG	-0.728121052
lnc-RAPH1-6	A1BG	-0.729855444
lnc-SERHL2-7	A1BG	-0.719175915
lnc-TICAM1-1	A1BG	-0.704808201
XLOC_1093926	A1BG	-0.719471314
XLOC_2394941	A1BG	-0.746249406
lnc-AP3S1-15	AKT3	0.803105214
lnc-CDK12-2	AKT3	0.769446677
lnc-CSNK1A1-7	AKT3	0.780501667
lnc-EEF1B2-3	AKT3	0.783185349
lnc-FOXN1-1	AKT3	0.701447634
lnc-GNS-3	AKT3	0.766189666
lnc-IL31RA-1	AKT3	0.75307594
lnc-KB-1980E6.3.1-6	AKT3	0.813582582
lnc-LAT2-2	AKT3	0.787113993
lnc-LRRC38-2	AKT3	0.805594138
lnc-NLRP2-2	AKT3	0.798607936
lnc-PHLDB1-1	AKT3	0.76542101
lnc-RAPH1-6	AKT3	0.767898852
lnc-SERHL2-7	AKT3	0.748320547
lnc-SLA2-1	AKT3	0.789723166
lnc-SLC46A2-1	AKT3	0.777080845
lnc-TICAM1-1	AKT3	0.740353514
XLOC_1093926	AKT3	0.756269243
XLOC_2394941	AKT3	0.788967914
XLOC_515910	AKT3	0.735816444
lnc-AP3S1-15	ZBTB11-AS1	0.697128924
lnc-CSNK1A1-7	ZBTB11-AS1	0.69909605
lnc-FOXN1-1	ZBTB11-AS1	0.718948853
lnc-LRRC38-2	ZBTB11-AS1	0.716325976
lnc-NLRP2-2	ZBTB11-AS1	0.720525623
lnc-SLA2-1	ZBTB11-AS1	0.709432286
lnc-SLC46A2-1	ZBTB11-AS1	0.724889873
lnc-AP3S1-15	NR2E3	-0.752037455
lnc-CDK12-2	NR2E3	-0.817910327
lnc-CSNK1A1-7	NR2E3	-0.745464316
lnc-EEF1B2-3	NR2E3	-0.799710511
lnc-FOXN1-1	NR2E3	-0.840260849
lnc-GNS-3	NR2E3	-0.815756494
lnc-IL31RA-1	NR2E3	-0.812712735
lnc-KB-1980E6.3.1-6	NR2E3	-0.724985475
lnc-LAT2-2	NR2E3	-0.804070107
lnc-LRRC38-2	NR2E3	-0.714784427
lnc-PHLDB1-1	NR2E3	-0.809066444
lnc-RAPH1-6	NR2E3	-0.797013404
lnc-SERHL2-7	NR2E3	-0.82844618
lnc-SLC46A2-1	NR2E3	-0.718388353
lnc-TICAM1-1	NR2E3	-0.808887363
XLOC_1093926	NR2E3	-0.802465039
XLOC_2394941	NR2E3	-0.795430144
lnc-AP3S1-15	DDTL	0.756586145
lnc-CDK12-2	DDTL	0.704653903
lnc-CSNK1A1-7	DDTL	0.76809224
lnc-EEF1B2-3	DDTL	0.691933391
lnc-FOXN1-1	DDTL	0.733587084
lnc-GNS-3	DDTL	0.708189632
lnc-IL31RA-1	DDTL	0.71177762
lnc-LAT2-2	DDTL	0.693762
lnc-LRRC38-2	DDTL	0.747368077
lnc-NLRP2-2	DDTL	0.748906392
lnc-PHLDB1-1	DDTL	0.7074338
lnc-RAPH1-6	DDTL	0.709094182
lnc-SERHL2-7	DDTL	0.716664282
lnc-SLA2-1	DDTL	0.749204966
lnc-SLC46A2-1	DDTL	0.764775618
lnc-TICAM1-1	DDTL	0.714406426
XLOC_1093926	DDTL	0.713100408
XLOC_515910	DDTL	0.688693012
lnc-AP3S1-15	ACOT8	0.945395165
lnc-CDK12-2	ACOT8	0.985260387
lnc-CSNK1A1-7	ACOT8	0.955561385
lnc-EEF1B2-3	ACOT8	0.992645767
lnc-FOXN1-1	ACOT8	0.969744173
lnc-GNS-3	ACOT8	0.98614364
lnc-IL31RA-1	ACOT8	0.99408148
lnc-KB-1980E6.3.1-6	ACOT8	0.966407663
lnc-LAT2-2	ACOT8	0.983153716
lnc-LRRC38-2	ACOT8	0.952332067
lnc-NLRP2-2	ACOT8	0.894578932
lnc-PHLDB1-1	ACOT8	0.99284257
lnc-RAPH1-6	ACOT8	0.991446012
lnc-SERHL2-7	ACOT8	0.985985153
lnc-SLA2-1	ACOT8	0.857920688
lnc-SLC46A2-1	ACOT8	0.944793716
lnc-TICAM1-1	ACOT8	0.994404295
XLOC_1093926	ACOT8	0.99324018
XLOC_2394941	ACOT8	0.970907963
XLOC_515910	ACOT8	0.923457246
lnc-EEF1B2-3	GNPDA1	0.693978307
lnc-KB-1980E6.3.1-6	GNPDA1	0.693509351
XLOC_2394941	GNPDA1	0.735030668
lnc-AP3S1-15	DNM1P35	-0.764858492
lnc-CDK12-2	DNM1P35	-0.752321785
lnc-CSNK1A1-7	DNM1P35	-0.767049023
lnc-EEF1B2-3	DNM1P35	-0.752925776
lnc-FOXN1-1	DNM1P35	-0.720479206
lnc-GNS-3	DNM1P35	-0.74113997
lnc-IL31RA-1	DNM1P35	-0.745626404
lnc-KB-1980E6.3.1-6	DNM1P35	-0.705989215
lnc-LAT2-2	DNM1P35	-0.751106543
lnc-LRRC38-2	DNM1P35	-0.756097631
lnc-NLRP2-2	DNM1P35	-0.735960302
lnc-PHLDB1-1	DNM1P35	-0.745845343
lnc-RAPH1-6	DNM1P35	-0.765586782
lnc-SERHL2-7	DNM1P35	-0.743208595
lnc-SLA2-1	DNM1P35	-0.728894704
lnc-SLC46A2-1	DNM1P35	-0.748595754
lnc-TICAM1-1	DNM1P35	-0.741023808
XLOC_1093926	DNM1P35	-0.752334923
XLOC_2394941	DNM1P35	-0.726511813
XLOC_515910	DNM1P35	-0.850077319
lnc-AP3S1-15	LOC100128361	0.936078233
lnc-CDK12-2	LOC100128361	0.970849549
lnc-CSNK1A1-7	LOC100128361	0.954608083
lnc-EEF1B2-3	LOC100128361	0.960464581
lnc-FOXN1-1	LOC100128361	0.949032452
lnc-GNS-3	LOC100128361	0.961294511
lnc-IL31RA-1	LOC100128361	0.975545419
lnc-KB-1980E6.3.1-6	LOC100128361	0.926287205
lnc-LAT2-2	LOC100128361	0.954561552
lnc-LRRC38-2	LOC100128361	0.916413189
lnc-NLRP2-2	LOC100128361	0.859675783
lnc-PHLDB1-1	LOC100128361	0.967181474
lnc-RAPH1-6	LOC100128361	0.983410655
lnc-SERHL2-7	LOC100128361	0.977234996
lnc-SLA2-1	LOC100128361	0.834196618
lnc-SLC46A2-1	LOC100128361	0.924945321
lnc-TICAM1-1	LOC100128361	0.977315348
XLOC_1093926	LOC100128361	0.978366725
XLOC_2394941	LOC100128361	0.918200921
XLOC_515910	LOC100128361	0.913781889
lnc-FOXN1-1	C19orf71	0.740819347
lnc-AP3S1-15	OST4	0.733417832
lnc-CDK12-2	OST4	0.779223301
lnc-CSNK1A1-7	OST4	0.716083421
lnc-EEF1B2-3	OST4	0.759919012
lnc-FOXN1-1	OST4	0.717579901
lnc-GNS-3	OST4	0.739764485
lnc-IL31RA-1	OST4	0.75718331
lnc-KB-1980E6.3.1-6	OST4	0.729342848
lnc-LAT2-2	OST4	0.750506661
lnc-LRRC38-2	OST4	0.708723017
lnc-PHLDB1-1	OST4	0.743327594
lnc-RAPH1-6	OST4	0.761817234
lnc-SERHL2-7	OST4	0.775039501
lnc-SLC46A2-1	OST4	0.70631582
lnc-TICAM1-1	OST4	0.74882555
XLOC_1093926	OST4	0.744594913
XLOC_2394941	OST4	0.737500973
XLOC_515910	OST4	0.706348244
lnc-AP3S1-15	LOC100129034	0.849314988
lnc-CDK12-2	LOC100129034	0.90770601
lnc-CSNK1A1-7	LOC100129034	0.851310963
lnc-EEF1B2-3	LOC100129034	0.903885505
lnc-FOXN1-1	LOC100129034	0.927825987
lnc-GNS-3	LOC100129034	0.913937654
lnc-IL31RA-1	LOC100129034	0.913350094
lnc-KB-1980E6.3.1-6	LOC100129034	0.789723835
lnc-LAT2-2	LOC100129034	0.902117307
lnc-LRRC38-2	LOC100129034	0.836906083
lnc-NLRP2-2	LOC100129034	0.769557563
lnc-PHLDB1-1	LOC100129034	0.912406032
lnc-RAPH1-6	LOC100129034	0.896655402
lnc-SERHL2-7	LOC100129034	0.916407405
lnc-SLA2-1	LOC100129034	0.727276778
lnc-SLC46A2-1	LOC100129034	0.835475107
lnc-TICAM1-1	LOC100129034	0.912536193
XLOC_1093926	LOC100129034	0.906004212
XLOC_2394941	LOC100129034	0.897187883
XLOC_515910	LOC100129034	0.882914559
lnc-AP3S1-15	LOC100129361	0.775262005
lnc-CDK12-2	LOC100129361	0.714601612
lnc-CSNK1A1-7	LOC100129361	0.754963914
lnc-EEF1B2-3	LOC100129361	0.701604864
lnc-FOXN1-1	LOC100129361	0.749324579
lnc-GNS-3	LOC100129361	0.709484236
lnc-IL31RA-1	LOC100129361	0.705467202
lnc-LAT2-2	LOC100129361	0.704347678
lnc-LRRC38-2	LOC100129361	0.770453831
lnc-NLRP2-2	LOC100129361	0.780158399
lnc-PHLDB1-1	LOC100129361	0.703475217
lnc-RAPH1-6	LOC100129361	0.69052275
lnc-SERHL2-7	LOC100129361	0.719546482
lnc-SLA2-1	LOC100129361	0.776287482
lnc-SLC46A2-1	LOC100129361	0.775671099
lnc-TICAM1-1	LOC100129361	0.699487648
XLOC_1093926	LOC100129361	0.693687614
XLOC_2394941	LOC100129361	0.705329771
lnc-AP3S1-15	CCDC152	0.927579866
lnc-CDK12-2	CCDC152	0.87410167
lnc-CSNK1A1-7	CCDC152	0.923863774
lnc-EEF1B2-3	CCDC152	0.888586515
lnc-FOXN1-1	CCDC152	0.817285914
lnc-GNS-3	CCDC152	0.876677424
lnc-IL31RA-1	CCDC152	0.875056276
lnc-KB-1980E6.3.1-6	CCDC152	0.871678731
lnc-LAT2-2	CCDC152	0.884321611
lnc-LRRC38-2	CCDC152	0.949525668
lnc-NLRP2-2	CCDC152	0.950189479
lnc-PHLDB1-1	CCDC152	0.881262433
lnc-RAPH1-6	CCDC152	0.881367997
lnc-SERHL2-7	CCDC152	0.864396498
lnc-SLA2-1	CCDC152	0.941572934
lnc-SLC46A2-1	CCDC152	0.935538838
lnc-TICAM1-1	CCDC152	0.870628959
XLOC_1093926	CCDC152	0.878127195
XLOC_2394941	CCDC152	0.878333563
XLOC_515910	CCDC152	0.849014255
lnc-AP3S1-15	LOC100129973	0.718748511
lnc-CDK12-2	LOC100129973	0.730748932
lnc-CSNK1A1-7	LOC100129973	0.71471089
lnc-EEF1B2-3	LOC100129973	0.730025329
lnc-FOXN1-1	LOC100129973	0.784752907
lnc-GNS-3	LOC100129973	0.726443424
lnc-IL31RA-1	LOC100129973	0.731801835
lnc-KB-1980E6.3.1-6	LOC100129973	0.746255586
lnc-LAT2-2	LOC100129973	0.723233115
lnc-LRRC38-2	LOC100129973	0.723970247
lnc-NLRP2-2	LOC100129973	0.692374589
lnc-PHLDB1-1	LOC100129973	0.728588245
lnc-RAPH1-6	LOC100129973	0.721187249
lnc-SERHL2-7	LOC100129973	0.733371872
lnc-SLC46A2-1	LOC100129973	0.720432594
lnc-TICAM1-1	LOC100129973	0.72996859
XLOC_1093926	LOC100129973	0.723883555
XLOC_2394941	LOC100129973	0.722369605
lnc-FOXN1-1	LOC100130264	-0.77056966
lnc-KB-1980E6.3.1-6	LOC100130264	-0.722554686
lnc-AP3S1-15	LOC100130331	-0.753793035
lnc-CDK12-2	LOC100130331	-0.783218887
lnc-CSNK1A1-7	LOC100130331	-0.758448841
lnc-EEF1B2-3	LOC100130331	-0.784294357
lnc-FOXN1-1	LOC100130331	-0.761871303
lnc-GNS-3	LOC100130331	-0.772618214
lnc-IL31RA-1	LOC100130331	-0.777137553
lnc-KB-1980E6.3.1-6	LOC100130331	-0.868211349
lnc-LAT2-2	LOC100130331	-0.782224356
lnc-LRRC38-2	LOC100130331	-0.737682288
lnc-NLRP2-2	LOC100130331	-0.691951633
lnc-PHLDB1-1	LOC100130331	-0.777472003
lnc-RAPH1-6	LOC100130331	-0.796625404
lnc-SERHL2-7	LOC100130331	-0.774281912
lnc-SLC46A2-1	LOC100130331	-0.727054494
lnc-TICAM1-1	LOC100130331	-0.772631851
XLOC_1093926	LOC100130331	-0.783801836
XLOC_2394941	LOC100130331	-0.757554575
lnc-AP3S1-15	EFCAB10	0.95443093
lnc-CDK12-2	EFCAB10	0.994079624
lnc-CSNK1A1-7	EFCAB10	0.953974189
lnc-EEF1B2-3	EFCAB10	0.99945629
lnc-FOXN1-1	EFCAB10	0.97193693
lnc-GNS-3	EFCAB10	0.991423701
lnc-IL31RA-1	EFCAB10	0.995364701
lnc-KB-1980E6.3.1-6	EFCAB10	0.968002799
lnc-LAT2-2	EFCAB10	0.991624071
lnc-LRRC38-2	EFCAB10	0.954498978
lnc-NLRP2-2	EFCAB10	0.896903258
lnc-PHLDB1-1	EFCAB10	0.995111811
lnc-RAPH1-6	EFCAB10	0.991289973
lnc-SERHL2-7	EFCAB10	0.992495246
lnc-SLA2-1	EFCAB10	0.859899994
lnc-SLC46A2-1	EFCAB10	0.943894083
lnc-TICAM1-1	EFCAB10	0.992166485
XLOC_1093926	EFCAB10	0.991364678
XLOC_2394941	EFCAB10	0.984656124
XLOC_515910	EFCAB10	0.918147718
lnc-AP3S1-15	USP3-AS1	0.961709228
lnc-CDK12-2	USP3-AS1	0.99756619
lnc-CSNK1A1-7	USP3-AS1	0.963998384
lnc-EEF1B2-3	USP3-AS1	0.998596438
lnc-FOXN1-1	USP3-AS1	0.976504329
lnc-GNS-3	USP3-AS1	0.99588327
lnc-IL31RA-1	USP3-AS1	0.999210059
lnc-KB-1980E6.3.1-6	USP3-AS1	0.969302507
lnc-LAT2-2	USP3-AS1	0.994835807
lnc-LRRC38-2	USP3-AS1	0.953961046
lnc-NLRP2-2	USP3-AS1	0.897261922
lnc-PHLDB1-1	USP3-AS1	0.999367122
lnc-RAPH1-6	USP3-AS1	0.997761431
lnc-SERHL2-7	USP3-AS1	0.998120366
lnc-SLA2-1	USP3-AS1	0.863522762
lnc-SLC46A2-1	USP3-AS1	0.94641395
lnc-TICAM1-1	USP3-AS1	0.995392556
XLOC_1093926	USP3-AS1	0.996969987
XLOC_2394941	USP3-AS1	0.981374561
XLOC_515910	USP3-AS1	0.925531446
lnc-AP3S1-15	TSTD1	0.81452288
lnc-CDK12-2	TSTD1	0.712080501
lnc-CSNK1A1-7	TSTD1	0.83413519
lnc-EEF1B2-3	TSTD1	0.726355279
lnc-FOXN1-1	TSTD1	0.716351628
lnc-GNS-3	TSTD1	0.736602554
lnc-IL31RA-1	TSTD1	0.737546734
lnc-LAT2-2	TSTD1	0.721226304
lnc-LRRC38-2	TSTD1	0.855860369
lnc-NLRP2-2	TSTD1	0.888021028
lnc-PHLDB1-1	TSTD1	0.741546179
lnc-RAPH1-6	TSTD1	0.728399638
lnc-SERHL2-7	TSTD1	0.720732201
lnc-SLA2-1	TSTD1	0.891757395
lnc-SLC46A2-1	TSTD1	0.863554946
lnc-TICAM1-1	TSTD1	0.744570038
XLOC_1093926	TSTD1	0.742889329
XLOC_2394941	TSTD1	0.710130134
lnc-AP3S1-15	LOC100131257	-0.698045487
lnc-CDK12-2	LOC100131257	-0.756443521
lnc-EEF1B2-3	LOC100131257	-0.745965131
lnc-FOXN1-1	LOC100131257	-0.816318052
lnc-GNS-3	LOC100131257	-0.759511343
lnc-IL31RA-1	LOC100131257	-0.741683235
lnc-KB-1980E6.3.1-6	LOC100131257	-0.708515242
lnc-LAT2-2	LOC100131257	-0.757240097
lnc-PHLDB1-1	LOC100131257	-0.747674072
lnc-RAPH1-6	LOC100131257	-0.726240902
lnc-SERHL2-7	LOC100131257	-0.757091072
lnc-TICAM1-1	LOC100131257	-0.731233395
XLOC_1093926	LOC100131257	-0.730811081
XLOC_2394941	LOC100131257	-0.765205596
lnc-AP3S1-15	LOC100131626	0.822136205
lnc-CDK12-2	LOC100131626	0.731067949
lnc-CSNK1A1-7	LOC100131626	0.846268032
lnc-EEF1B2-3	LOC100131626	0.745892429
lnc-FOXN1-1	LOC100131626	0.695226027
lnc-GNS-3	LOC100131626	0.743706714
lnc-IL31RA-1	LOC100131626	0.757704274
lnc-KB-1980E6.3.1-6	LOC100131626	0.699051617
lnc-LAT2-2	LOC100131626	0.731278955
lnc-LRRC38-2	LOC100131626	0.873532517
lnc-NLRP2-2	LOC100131626	0.900788579
lnc-PHLDB1-1	LOC100131626	0.755036659
lnc-RAPH1-6	LOC100131626	0.751355458
lnc-SERHL2-7	LOC100131626	0.738972656
lnc-SLA2-1	LOC100131626	0.902282705
lnc-SLC46A2-1	LOC100131626	0.88207767
lnc-TICAM1-1	LOC100131626	0.766574723
XLOC_1093926	LOC100131626	0.761260097
XLOC_2394941	LOC100131626	0.717200443
lnc-KB-1980E6.3.1-6	ZNF717	0.688252738
lnc-LAT2-2	ZNF717	0.688024189
XLOC_2394941	ZNF717	0.728142792
lnc-AP3S1-15	RRN3P3	0.817187487
lnc-CDK12-2	RRN3P3	0.687883193
lnc-CSNK1A1-7	RRN3P3	0.813412676
lnc-GNS-3	RRN3P3	0.696917617
lnc-LAT2-2	RRN3P3	0.696133234
lnc-LRRC38-2	RRN3P3	0.817423492
lnc-NLRP2-2	RRN3P3	0.864057035
lnc-PHLDB1-1	RRN3P3	0.692899252
lnc-RAPH1-6	RRN3P3	0.69520454
lnc-SLA2-1	RRN3P3	0.885928131
lnc-SLC46A2-1	RRN3P3	0.822093861
XLOC_1093926	RRN3P3	0.693267996
XLOC_515910	RRN3P3	0.723363256
lnc-AP3S1-15	PHKA2-AS1	0.840963213
lnc-CDK12-2	PHKA2-AS1	0.808037352
lnc-CSNK1A1-7	PHKA2-AS1	0.857662674
lnc-EEF1B2-3	PHKA2-AS1	0.807955642
lnc-FOXN1-1	PHKA2-AS1	0.762356169
lnc-GNS-3	PHKA2-AS1	0.803260363
lnc-IL31RA-1	PHKA2-AS1	0.813411471
lnc-KB-1980E6.3.1-6	PHKA2-AS1	0.727778088
lnc-LAT2-2	PHKA2-AS1	0.803126037
lnc-LRRC38-2	PHKA2-AS1	0.841381999
lnc-NLRP2-2	PHKA2-AS1	0.830019454
lnc-PHLDB1-1	PHKA2-AS1	0.810502776
lnc-RAPH1-6	PHKA2-AS1	0.829508079
lnc-SERHL2-7	PHKA2-AS1	0.807291623
lnc-SLA2-1	PHKA2-AS1	0.826468658
lnc-SLC46A2-1	PHKA2-AS1	0.845172507
lnc-TICAM1-1	PHKA2-AS1	0.814631062
XLOC_1093926	PHKA2-AS1	0.822091842
XLOC_2394941	PHKA2-AS1	0.769799828
XLOC_515910	PHKA2-AS1	0.912556909
lnc-CDK12-2	FCGR1C	0.69090422
lnc-CSNK1A1-7	FCGR1C	0.717791539
lnc-EEF1B2-3	FCGR1C	0.723398563
lnc-FOXN1-1	FCGR1C	0.731918562
lnc-GNS-3	FCGR1C	0.729352972
lnc-IL31RA-1	FCGR1C	0.735403483
lnc-KB-1980E6.3.1-6	FCGR1C	0.717413022
lnc-LAT2-2	FCGR1C	0.710716394
lnc-LRRC38-2	FCGR1C	0.717365813
lnc-PHLDB1-1	FCGR1C	0.742108375
lnc-RAPH1-6	FCGR1C	0.728575856
lnc-SERHL2-7	FCGR1C	0.699758813
lnc-SLC46A2-1	FCGR1C	0.715148782
lnc-TICAM1-1	FCGR1C	0.749458578
XLOC_1093926	FCGR1C	0.748686669
XLOC_2394941	FCGR1C	0.6975269
XLOC_515910	FCGR1C	0.688641867
lnc-CDK12-2	FGD5P1	-0.719537699
lnc-CSNK1A1-7	FGD5P1	-0.69291296
lnc-EEF1B2-3	FGD5P1	-0.724177347
lnc-FOXN1-1	FGD5P1	-0.722631721
lnc-GNS-3	FGD5P1	-0.708619397
lnc-IL31RA-1	FGD5P1	-0.714086532
lnc-KB-1980E6.3.1-6	FGD5P1	-0.725067346
lnc-LAT2-2	FGD5P1	-0.721045229
lnc-PHLDB1-1	FGD5P1	-0.715164331
lnc-RAPH1-6	FGD5P1	-0.737948092
lnc-SERHL2-7	FGD5P1	-0.707970424
lnc-TICAM1-1	FGD5P1	-0.709895477
XLOC_1093926	FGD5P1	-0.723170849
XLOC_2394941	FGD5P1	-0.695693319
XLOC_515910	FGD5P1	-0.815477955
lnc-AP3S1-15	PAXIP1OS	0.716191952
lnc-CDK12-2	PAXIP1OS	0.764350576
lnc-CSNK1A1-7	PAXIP1OS	0.724100755
lnc-EEF1B2-3	PAXIP1OS	0.735397842
lnc-FOXN1-1	PAXIP1OS	0.704641678
lnc-GNS-3	PAXIP1OS	0.717014141
lnc-IL31RA-1	PAXIP1OS	0.752148713
lnc-KB-1980E6.3.1-6	PAXIP1OS	0.701309492
lnc-LAT2-2	PAXIP1OS	0.719638431
lnc-LRRC38-2	PAXIP1OS	0.686534241
lnc-PHLDB1-1	PAXIP1OS	0.727388183
lnc-RAPH1-6	PAXIP1OS	0.766106826
lnc-SERHL2-7	PAXIP1OS	0.769347452
lnc-SLC46A2-1	PAXIP1OS	0.703283264
lnc-TICAM1-1	PAXIP1OS	0.751697132
XLOC_1093926	PAXIP1OS	0.745366683
XLOC_515910	PAXIP1OS	0.715733401
lnc-AP3S1-15	DPH3P1	0.732590884
lnc-CDK12-2	DPH3P1	0.816018899
lnc-CSNK1A1-7	DPH3P1	0.749974812
lnc-EEF1B2-3	DPH3P1	0.825703133
lnc-FOXN1-1	DPH3P1	0.871948509
lnc-GNS-3	DPH3P1	0.820921954
lnc-IL31RA-1	DPH3P1	0.827667291
lnc-KB-1980E6.3.1-6	DPH3P1	0.753101114
lnc-LAT2-2	DPH3P1	0.81754696
lnc-LRRC38-2	DPH3P1	0.731635395
lnc-PHLDB1-1	DPH3P1	0.827868805
lnc-RAPH1-6	DPH3P1	0.828250454
lnc-SERHL2-7	DPH3P1	0.816604908
lnc-SLC46A2-1	DPH3P1	0.721964939
lnc-TICAM1-1	DPH3P1	0.829572659
XLOC_1093926	DPH3P1	0.830468488
XLOC_2394941	DPH3P1	0.803855114
XLOC_515910	DPH3P1	0.935306403
lnc-AP3S1-15	LOC100133091	0.904639221
lnc-CDK12-2	LOC100133091	0.85518128
lnc-CSNK1A1-7	LOC100133091	0.918588755
lnc-EEF1B2-3	LOC100133091	0.847911789
lnc-FOXN1-1	LOC100133091	0.768661709
lnc-GNS-3	LOC100133091	0.843262872
lnc-IL31RA-1	LOC100133091	0.861009336
lnc-KB-1980E6.3.1-6	LOC100133091	0.844155561
lnc-LAT2-2	LOC100133091	0.838168329
lnc-LRRC38-2	LOC100133091	0.91134874
lnc-NLRP2-2	LOC100133091	0.909321183
lnc-PHLDB1-1	LOC100133091	0.851291517
lnc-RAPH1-6	LOC100133091	0.867420337
lnc-SERHL2-7	LOC100133091	0.860609766
lnc-SLA2-1	LOC100133091	0.907336016
lnc-SLC46A2-1	LOC100133091	0.924292741
lnc-TICAM1-1	LOC100133091	0.863619621
XLOC_1093926	LOC100133091	0.862296158
XLOC_2394941	LOC100133091	0.807243091
XLOC_515910	LOC100133091	0.702953125
lnc-FOXN1-1	LOC100133286	0.761560232
lnc-GNS-3	LOC100133286	0.687713601
lnc-IL31RA-1	LOC100133286	0.691575488
lnc-PHLDB1-1	LOC100133286	0.68825349
lnc-SERHL2-7	LOC100133286	0.69269038
lnc-TICAM1-1	LOC100133286	0.694110213
XLOC_1093926	LOC100133286	0.68761538
XLOC_515910	LOC100133286	0.709281825
lnc-NLRP2-2	PDCD6IP	0.688071989
lnc-SLA2-1	PDCD6IP	0.687299332
lnc-AP3S1-15	DNMBP-AS1	0.778395891
lnc-CDK12-2	DNMBP-AS1	0.715185819
lnc-CSNK1A1-7	DNMBP-AS1	0.797685121
lnc-EEF1B2-3	DNMBP-AS1	0.724513783
lnc-GNS-3	DNMBP-AS1	0.709063297
lnc-IL31RA-1	DNMBP-AS1	0.726472597
lnc-KB-1980E6.3.1-6	DNMBP-AS1	0.726911835
lnc-LAT2-2	DNMBP-AS1	0.711252254
lnc-LRRC38-2	DNMBP-AS1	0.807408877
lnc-NLRP2-2	DNMBP-AS1	0.819436637
lnc-PHLDB1-1	DNMBP-AS1	0.721961418
lnc-RAPH1-6	DNMBP-AS1	0.741269372
lnc-SERHL2-7	DNMBP-AS1	0.712474245
lnc-SLA2-1	DNMBP-AS1	0.823026151
lnc-SLC46A2-1	DNMBP-AS1	0.810880527
lnc-TICAM1-1	DNMBP-AS1	0.730224268
XLOC_1093926	DNMBP-AS1	0.734448944
XLOC_515910	DNMBP-AS1	0.725686633
lnc-CDK12-2	SMG1P3	-0.689299152
lnc-EEF1B2-3	SMG1P3	-0.699684778
lnc-GNS-3	SMG1P3	-0.689731968
lnc-IL31RA-1	SMG1P3	-0.705490856
lnc-KB-1980E6.3.1-6	SMG1P3	-0.792267034
lnc-LAT2-2	SMG1P3	-0.687668898
lnc-PHLDB1-1	SMG1P3	-0.70210305
lnc-RAPH1-6	SMG1P3	-0.718219307
lnc-SERHL2-7	SMG1P3	-0.689487924
lnc-TICAM1-1	SMG1P3	-0.711184055
XLOC_1093926	SMG1P3	-0.715110748
lnc-AP3S1-15	BCDIN3D-AS1	0.854034739
lnc-CDK12-2	BCDIN3D-AS1	0.819963705
lnc-CSNK1A1-7	BCDIN3D-AS1	0.866115889
lnc-EEF1B2-3	BCDIN3D-AS1	0.811633126
lnc-FOXN1-1	BCDIN3D-AS1	0.876744051
lnc-GNS-3	BCDIN3D-AS1	0.832078732
lnc-IL31RA-1	BCDIN3D-AS1	0.831961023
lnc-KB-1980E6.3.1-6	BCDIN3D-AS1	0.737441028
lnc-LAT2-2	BCDIN3D-AS1	0.813531825
lnc-LRRC38-2	BCDIN3D-AS1	0.848584548
lnc-NLRP2-2	BCDIN3D-AS1	0.835469246
lnc-PHLDB1-1	BCDIN3D-AS1	0.830285581
lnc-RAPH1-6	BCDIN3D-AS1	0.820981452
lnc-SERHL2-7	BCDIN3D-AS1	0.834144738
lnc-SLA2-1	BCDIN3D-AS1	0.823758454
lnc-SLC46A2-1	BCDIN3D-AS1	0.8637294
lnc-TICAM1-1	BCDIN3D-AS1	0.835163724
XLOC_1093926	BCDIN3D-AS1	0.83145957
XLOC_2394941	BCDIN3D-AS1	0.793275296
XLOC_515910	BCDIN3D-AS1	0.711502406
lnc-CDK12-2	DDX11L5	-0.696685743
lnc-EEF1B2-3	DDX11L5	-0.692709187
lnc-GNS-3	DDX11L5	-0.687278569
lnc-IL31RA-1	DDX11L5	-0.689928187
lnc-KB-1980E6.3.1-6	DDX11L5	-0.740233689
lnc-LAT2-2	DDX11L5	-0.692569324
lnc-PHLDB1-1	DDX11L5	-0.68917266
lnc-RAPH1-6	DDX11L5	-0.701897458
lnc-SERHL2-7	DDX11L5	-0.69199147
XLOC_1093926	DDX11L5	-0.692759849
lnc-FOXN1-1	DDX11L9	-0.725709542
lnc-AP3S1-15	REXO1L2P	-0.832614113
lnc-CDK12-2	REXO1L2P	-0.838136653
lnc-CSNK1A1-7	REXO1L2P	-0.808998064
lnc-EEF1B2-3	REXO1L2P	-0.861711722
lnc-FOXN1-1	REXO1L2P	-0.84966108
lnc-GNS-3	REXO1L2P	-0.864203848
lnc-IL31RA-1	REXO1L2P	-0.835242126
lnc-KB-1980E6.3.1-6	REXO1L2P	-0.871942287
lnc-LAT2-2	REXO1L2P	-0.870490557
lnc-LRRC38-2	REXO1L2P	-0.842516211
lnc-NLRP2-2	REXO1L2P	-0.808975404
lnc-PHLDB1-1	REXO1L2P	-0.856732621
lnc-RAPH1-6	REXO1L2P	-0.822682894
lnc-SERHL2-7	REXO1L2P	-0.82565581
lnc-SLA2-1	REXO1L2P	-0.774683927
lnc-SLC46A2-1	REXO1L2P	-0.809351689
lnc-TICAM1-1	REXO1L2P	-0.824543002
XLOC_1093926	REXO1L2P	-0.832783947
XLOC_2394941	REXO1L2P	-0.895910569
XLOC_515910	REXO1L2P	-0.726105387
lnc-NLRP2-2	PAN3-AS1	0.722163765
lnc-SLA2-1	PAN3-AS1	0.732605721
lnc-AP3S1-15	ZNF587B	0.732488234
lnc-CSNK1A1-7	ZNF587B	0.696916784
lnc-LRRC38-2	ZNF587B	0.75953589
lnc-NLRP2-2	ZNF587B	0.825316015
lnc-SLA2-1	ZNF587B	0.848821203
lnc-SLC46A2-1	ZNF587B	0.752029124
lnc-FOXN1-1	SLC25A5-AS1	0.69146027
lnc-AP3S1-15	TOM1L1	0.845324394
lnc-CDK12-2	TOM1L1	0.866833931
lnc-CSNK1A1-7	TOM1L1	0.824150609
lnc-EEF1B2-3	TOM1L1	0.870376226
lnc-FOXN1-1	TOM1L1	0.793709721
lnc-GNS-3	TOM1L1	0.865023414
lnc-IL31RA-1	TOM1L1	0.852034972
lnc-KB-1980E6.3.1-6	TOM1L1	0.789764037
lnc-LAT2-2	TOM1L1	0.875807341
lnc-LRRC38-2	TOM1L1	0.829186038
lnc-NLRP2-2	TOM1L1	0.785708841
lnc-PHLDB1-1	TOM1L1	0.860718014
lnc-RAPH1-6	TOM1L1	0.854256108
lnc-SERHL2-7	TOM1L1	0.855254382
lnc-SLA2-1	TOM1L1	0.757993797
lnc-SLC46A2-1	TOM1L1	0.807642285
lnc-TICAM1-1	TOM1L1	0.840535656
XLOC_1093926	TOM1L1	0.849120572
XLOC_2394941	TOM1L1	0.877858812
XLOC_515910	TOM1L1	0.923458437
lnc-CDK12-2	TOM1	-0.718132138
lnc-EEF1B2-3	TOM1	-0.706819446
lnc-GNS-3	TOM1	-0.712492741
lnc-IL31RA-1	TOM1	-0.712130207
lnc-LAT2-2	TOM1	-0.709096501
lnc-PHLDB1-1	TOM1	-0.709869221
lnc-RAPH1-6	TOM1	-0.709767748
lnc-SERHL2-7	TOM1	-0.721299719
lnc-TICAM1-1	TOM1	-0.70817347
XLOC_1093926	TOM1	-0.708205868
XLOC_2394941	TOM1	-0.695666955
lnc-CDK12-2	SH2D3C	-0.715333843
lnc-EEF1B2-3	SH2D3C	-0.704054043
lnc-GNS-3	SH2D3C	-0.709428518
lnc-IL31RA-1	SH2D3C	-0.709143371
lnc-LAT2-2	SH2D3C	-0.706330091
lnc-PHLDB1-1	SH2D3C	-0.706884073
lnc-RAPH1-6	SH2D3C	-0.707267877
lnc-SERHL2-7	SH2D3C	-0.718264948
lnc-TICAM1-1	SH2D3C	-0.705132019
XLOC_1093926	SH2D3C	-0.705392896
XLOC_2394941	SH2D3C	-0.692648649
lnc-AP3S1-15	LOC100505549	0.845312591
lnc-CDK12-2	LOC100505549	0.906268758
lnc-CSNK1A1-7	LOC100505549	0.847964674
lnc-EEF1B2-3	LOC100505549	0.915657841
lnc-FOXN1-1	LOC100505549	0.880746522
lnc-GNS-3	LOC100505549	0.898504913
lnc-IL31RA-1	LOC100505549	0.906058974
lnc-KB-1980E6.3.1-6	LOC100505549	0.864245872
lnc-LAT2-2	LOC100505549	0.906034749
lnc-LRRC38-2	LOC100505549	0.847005419
lnc-NLRP2-2	LOC100505549	0.781109073
lnc-PHLDB1-1	LOC100505549	0.905905395
lnc-RAPH1-6	LOC100505549	0.91182646
lnc-SERHL2-7	LOC100505549	0.898580246
lnc-SLA2-1	LOC100505549	0.742951522
lnc-SLC46A2-1	LOC100505549	0.830076885
lnc-TICAM1-1	LOC100505549	0.902564018
XLOC_1093926	LOC100505549	0.905780622
XLOC_2394941	LOC100505549	0.89679007
XLOC_515910	LOC100505549	0.986763217
lnc-AP3S1-15	PTOV1-AS1	0.838390019
lnc-CDK12-2	PTOV1-AS1	0.913435235
lnc-CSNK1A1-7	PTOV1-AS1	0.841278237
lnc-EEF1B2-3	PTOV1-AS1	0.908282386
lnc-FOXN1-1	PTOV1-AS1	0.947359176
lnc-GNS-3	PTOV1-AS1	0.915593703
lnc-IL31RA-1	PTOV1-AS1	0.918155341
lnc-KB-1980E6.3.1-6	PTOV1-AS1	0.851735676
lnc-LAT2-2	PTOV1-AS1	0.904677456
lnc-LRRC38-2	PTOV1-AS1	0.82336704
lnc-NLRP2-2	PTOV1-AS1	0.746613921
lnc-PHLDB1-1	PTOV1-AS1	0.915222387
lnc-RAPH1-6	PTOV1-AS1	0.902484259
lnc-SERHL2-7	PTOV1-AS1	0.922014388
lnc-SLA2-1	PTOV1-AS1	0.700654254
lnc-SLC46A2-1	PTOV1-AS1	0.821544846
lnc-TICAM1-1	PTOV1-AS1	0.917432381
XLOC_1093926	PTOV1-AS1	0.91009678
XLOC_2394941	PTOV1-AS1	0.898354745
XLOC_515910	PTOV1-AS1	0.792765335
lnc-AP3S1-15	SPTY2D1-AS1	0.879498614
lnc-CDK12-2	SPTY2D1-AS1	0.869592118
lnc-CSNK1A1-7	SPTY2D1-AS1	0.881225492
lnc-EEF1B2-3	SPTY2D1-AS1	0.875923607
lnc-FOXN1-1	SPTY2D1-AS1	0.824455258
lnc-GNS-3	SPTY2D1-AS1	0.866977052
lnc-IL31RA-1	SPTY2D1-AS1	0.870235829
lnc-KB-1980E6.3.1-6	SPTY2D1-AS1	0.810557173
lnc-LAT2-2	SPTY2D1-AS1	0.871065923
lnc-LRRC38-2	SPTY2D1-AS1	0.885459222
lnc-NLRP2-2	SPTY2D1-AS1	0.860433229
lnc-PHLDB1-1	SPTY2D1-AS1	0.871690295
lnc-RAPH1-6	SPTY2D1-AS1	0.876490995
lnc-SERHL2-7	SPTY2D1-AS1	0.864360188
lnc-SLA2-1	SPTY2D1-AS1	0.843033359
lnc-SLC46A2-1	SPTY2D1-AS1	0.876261444
lnc-TICAM1-1	SPTY2D1-AS1	0.867216252
XLOC_1093926	SPTY2D1-AS1	0.872243954
XLOC_2394941	SPTY2D1-AS1	0.857707984
XLOC_515910	SPTY2D1-AS1	0.908762521
lnc-AP3S1-15	PXN-AS1	0.943266316
lnc-CDK12-2	PXN-AS1	0.907856686
lnc-CSNK1A1-7	PXN-AS1	0.959436988
lnc-EEF1B2-3	PXN-AS1	0.896908519
lnc-FOXN1-1	PXN-AS1	0.867940884
lnc-GNS-3	PXN-AS1	0.899964511
lnc-IL31RA-1	PXN-AS1	0.913504769
lnc-KB-1980E6.3.1-6	PXN-AS1	0.88765255
lnc-LAT2-2	PXN-AS1	0.891866086
lnc-LRRC38-2	PXN-AS1	0.936334268
lnc-NLRP2-2	PXN-AS1	0.922278919
lnc-PHLDB1-1	PXN-AS1	0.905280002
lnc-RAPH1-6	PXN-AS1	0.920653171
lnc-SERHL2-7	PXN-AS1	0.915373993
lnc-SLA2-1	PXN-AS1	0.916323801
lnc-SLC46A2-1	PXN-AS1	0.951150248
lnc-TICAM1-1	PXN-AS1	0.915901804
XLOC_1093926	PXN-AS1	0.91667266
XLOC_2394941	PXN-AS1	0.855651698
XLOC_515910	PXN-AS1	0.763498929
lnc-AP3S1-15	EBLN3	0.947736345
lnc-CDK12-2	EBLN3	0.8542656
lnc-CSNK1A1-7	EBLN3	0.926132396
lnc-EEF1B2-3	EBLN3	0.858581047
lnc-FOXN1-1	EBLN3	0.78388065
lnc-GNS-3	EBLN3	0.854998855
lnc-IL31RA-1	EBLN3	0.846619371
lnc-KB-1980E6.3.1-6	EBLN3	0.811667629
lnc-LAT2-2	EBLN3	0.859766967
lnc-LRRC38-2	EBLN3	0.964317547
lnc-NLRP2-2	EBLN3	0.988966024
lnc-PHLDB1-1	EBLN3	0.852485588
lnc-RAPH1-6	EBLN3	0.840983714
lnc-SERHL2-7	EBLN3	0.848037237
lnc-SLA2-1	EBLN3	0.988927309
lnc-SLC46A2-1	EBLN3	0.955348737
lnc-TICAM1-1	EBLN3	0.838514916
XLOC_1093926	EBLN3	0.841094753
XLOC_2394941	EBLN3	0.864415319
XLOC_515910	EBLN3	0.736089121
lnc-AP3S1-15	PITRM1-AS1	0.896319197
lnc-CDK12-2	PITRM1-AS1	0.895659408
lnc-CSNK1A1-7	PITRM1-AS1	0.892896849
lnc-EEF1B2-3	PITRM1-AS1	0.889738176
lnc-FOXN1-1	PITRM1-AS1	0.914553241
lnc-GNS-3	PITRM1-AS1	0.896419361
lnc-IL31RA-1	PITRM1-AS1	0.895680751
lnc-KB-1980E6.3.1-6	PITRM1-AS1	0.773710282
lnc-LAT2-2	PITRM1-AS1	0.889527941
lnc-LRRC38-2	PITRM1-AS1	0.887811473
lnc-NLRP2-2	PITRM1-AS1	0.855224611
lnc-PHLDB1-1	PITRM1-AS1	0.894773185
lnc-RAPH1-6	PITRM1-AS1	0.886472578
lnc-SERHL2-7	PITRM1-AS1	0.900640338
lnc-SLA2-1	PITRM1-AS1	0.832066468
lnc-SLC46A2-1	PITRM1-AS1	0.888740533
lnc-TICAM1-1	PITRM1-AS1	0.892870415
XLOC_1093926	PITRM1-AS1	0.890237899
XLOC_2394941	PITRM1-AS1	0.880232566
XLOC_515910	PITRM1-AS1	0.891262615
lnc-AP3S1-15	LOC100507412	-0.88449954
lnc-CDK12-2	LOC100507412	-0.913767699
lnc-CSNK1A1-7	LOC100507412	-0.853376535
lnc-EEF1B2-3	LOC100507412	-0.93040784
lnc-FOXN1-1	LOC100507412	-0.9153035
lnc-GNS-3	LOC100507412	-0.924311535
lnc-IL31RA-1	LOC100507412	-0.90210592
lnc-KB-1980E6.3.1-6	LOC100507412	-0.921245064
lnc-LAT2-2	LOC100507412	-0.935427997
lnc-LRRC38-2	LOC100507412	-0.886432525
lnc-NLRP2-2	LOC100507412	-0.838271427
lnc-PHLDB1-1	LOC100507412	-0.918003633
lnc-RAPH1-6	LOC100507412	-0.890449254
lnc-SERHL2-7	LOC100507412	-0.899496877
lnc-SLA2-1	LOC100507412	-0.79785848
lnc-SLC46A2-1	LOC100507412	-0.851851656
lnc-TICAM1-1	LOC100507412	-0.888764869
XLOC_1093926	LOC100507412	-0.894231352
XLOC_2394941	LOC100507412	-0.960802382
XLOC_515910	LOC100507412	-0.822538417
lnc-AP3S1-15	SDCBP2-AS1	0.910750208
lnc-CDK12-2	SDCBP2-AS1	0.951760165
lnc-CSNK1A1-7	SDCBP2-AS1	0.946951322
lnc-EEF1B2-3	SDCBP2-AS1	0.953970324
lnc-FOXN1-1	SDCBP2-AS1	0.947269841
lnc-GNS-3	SDCBP2-AS1	0.951045222
lnc-IL31RA-1	SDCBP2-AS1	0.974372302
lnc-KB-1980E6.3.1-6	SDCBP2-AS1	0.917887757
lnc-LAT2-2	SDCBP2-AS1	0.937925605
lnc-LRRC38-2	SDCBP2-AS1	0.92001235
lnc-NLRP2-2	SDCBP2-AS1	0.8615423
lnc-PHLDB1-1	SDCBP2-AS1	0.964336505
lnc-RAPH1-6	SDCBP2-AS1	0.97662473
lnc-SERHL2-7	SDCBP2-AS1	0.962446017
lnc-SLA2-1	SDCBP2-AS1	0.830085305
lnc-SLC46A2-1	SDCBP2-AS1	0.929876481
lnc-TICAM1-1	SDCBP2-AS1	0.983866666
XLOC_1093926	SDCBP2-AS1	0.979031499
XLOC_2394941	SDCBP2-AS1	0.903526359
XLOC_515910	SDCBP2-AS1	0.915681455
lnc-AP3S1-15	EGFR-AS1	0.803360368
lnc-CDK12-2	EGFR-AS1	0.756196292
lnc-CSNK1A1-7	EGFR-AS1	0.82527593
lnc-EEF1B2-3	EGFR-AS1	0.762172947
lnc-FOXN1-1	EGFR-AS1	0.697449588
lnc-GNS-3	EGFR-AS1	0.748192497
lnc-IL31RA-1	EGFR-AS1	0.766440744
lnc-KB-1980E6.3.1-6	EGFR-AS1	0.837830087
lnc-LAT2-2	EGFR-AS1	0.749947001
lnc-LRRC38-2	EGFR-AS1	0.822807037
lnc-NLRP2-2	EGFR-AS1	0.82335912
lnc-PHLDB1-1	EGFR-AS1	0.760911319
lnc-RAPH1-6	EGFR-AS1	0.784190516
lnc-SERHL2-7	EGFR-AS1	0.754185026
lnc-SLA2-1	EGFR-AS1	0.823990568
lnc-SLC46A2-1	EGFR-AS1	0.827172085
lnc-TICAM1-1	EGFR-AS1	0.770188809
XLOC_1093926	EGFR-AS1	0.775637404
XLOC_2394941	EGFR-AS1	0.717460975
lnc-AP3S1-15	RNF212B	0.733565723
lnc-CDK12-2	RNF212B	0.735428382
lnc-CSNK1A1-7	RNF212B	0.716214834
lnc-EEF1B2-3	RNF212B	0.725597151
lnc-FOXN1-1	RNF212B	0.768114845
lnc-GNS-3	RNF212B	0.721550559
lnc-IL31RA-1	RNF212B	0.733200363
lnc-LAT2-2	RNF212B	0.713128637
lnc-LRRC38-2	RNF212B	0.747212555
lnc-NLRP2-2	RNF212B	0.723996559
lnc-PHLDB1-1	RNF212B	0.722279296
lnc-RAPH1-6	RNF212B	0.702918548
lnc-SERHL2-7	RNF212B	0.745163483
lnc-SLA2-1	RNF212B	0.696107723
lnc-SLC46A2-1	RNF212B	0.751048019
lnc-TICAM1-1	RNF212B	0.730964533
XLOC_1093926	RNF212B	0.710617717
XLOC_2394941	RNF212B	0.7274041
lnc-FOXN1-1	SEPT5-GP1BB	-0.763529173
lnc-SERHL2-7	SEPT5-GP1BB	-0.696353475
lnc-LRRC38-2	SAE1	0.698409639
lnc-NLRP2-2	SAE1	0.753058922
lnc-SLA2-1	SAE1	0.77339183
lnc-SLC46A2-1	SAE1	0.689194553
lnc-AP3S1-15	ABCC5	-0.726392193
lnc-CDK12-2	ABCC5	-0.794334343
lnc-EEF1B2-3	ABCC5	-0.801252697
lnc-FOXN1-1	ABCC5	-0.777450895
lnc-GNS-3	ABCC5	-0.778225478
lnc-IL31RA-1	ABCC5	-0.772611541
lnc-KB-1980E6.3.1-6	ABCC5	-0.796571027
lnc-LAT2-2	ABCC5	-0.795373997
lnc-LRRC38-2	ABCC5	-0.72739521
lnc-PHLDB1-1	ABCC5	-0.776189063
lnc-RAPH1-6	ABCC5	-0.757922041
lnc-SERHL2-7	ABCC5	-0.779607562
lnc-SLC46A2-1	ABCC5	-0.693374081
lnc-TICAM1-1	ABCC5	-0.757961666
XLOC_1093926	ABCC5	-0.75365115
XLOC_2394941	ABCC5	-0.826781329
lnc-AP3S1-15	LOC100631378	0.94322673
lnc-CDK12-2	LOC100631378	0.970412646
lnc-CSNK1A1-7	LOC100631378	0.964802644
lnc-EEF1B2-3	LOC100631378	0.973894035
lnc-FOXN1-1	LOC100631378	0.969113972
lnc-GNS-3	LOC100631378	0.9809271
lnc-IL31RA-1	LOC100631378	0.984295984
lnc-KB-1980E6.3.1-6	LOC100631378	0.946653636
lnc-LAT2-2	LOC100631378	0.97130811
lnc-LRRC38-2	LOC100631378	0.937316165
lnc-NLRP2-2	LOC100631378	0.883896289
lnc-PHLDB1-1	LOC100631378	0.985238206
lnc-RAPH1-6	LOC100631378	0.987020799
lnc-SERHL2-7	LOC100631378	0.97571132
lnc-SLA2-1	LOC100631378	0.854628798
lnc-SLC46A2-1	LOC100631378	0.938186146
lnc-TICAM1-1	LOC100631378	0.987180121
XLOC_1093926	LOC100631378	0.990889995
XLOC_2394941	LOC100631378	0.944580233
XLOC_515910	LOC100631378	0.918108232
lnc-FOXN1-1	PYCARDOS	0.704862419
lnc-AP3S1-15	LOC100652768	0.701658157
lnc-CSNK1A1-7	LOC100652768	0.711237347
lnc-LRRC38-2	LOC100652768	0.730684996
lnc-NLRP2-2	LOC100652768	0.75290928
lnc-SLA2-1	LOC100652768	0.757609199
lnc-SLC46A2-1	LOC100652768	0.733087565
lnc-KB-1980E6.3.1-6	SNX29P1	-0.71876882
lnc-RAPH1-6	SNX29P1	-0.686543476
XLOC_515910	SNX29P1	-0.726526339
lnc-AP3S1-15	MUC12	-0.803851037
lnc-CDK12-2	MUC12	-0.854071571
lnc-CSNK1A1-7	MUC12	-0.757538603
lnc-EEF1B2-3	MUC12	-0.854660608
lnc-FOXN1-1	MUC12	-0.804678131
lnc-GNS-3	MUC12	-0.861097825
lnc-IL31RA-1	MUC12	-0.825639986
lnc-KB-1980E6.3.1-6	MUC12	-0.818856294
lnc-LAT2-2	MUC12	-0.874104709
lnc-LRRC38-2	MUC12	-0.763985547
lnc-NLRP2-2	MUC12	-0.703057088
lnc-PHLDB1-1	MUC12	-0.844303318
lnc-RAPH1-6	MUC12	-0.816794546
lnc-SERHL2-7	MUC12	-0.839057517
lnc-SLC46A2-1	MUC12	-0.72960435
lnc-TICAM1-1	MUC12	-0.805644873
XLOC_1093926	MUC12	-0.816409813
XLOC_2394941	MUC12	-0.896806308
XLOC_515910	MUC12	-0.769215146
lnc-AP3S1-15	RNA45S5	-0.696532443
lnc-CDK12-2	RNA45S5	-0.730156871
lnc-EEF1B2-3	RNA45S5	-0.723809123
lnc-FOXN1-1	RNA45S5	-0.687769586
lnc-GNS-3	RNA45S5	-0.695350262
lnc-IL31RA-1	RNA45S5	-0.705337242
lnc-KB-1980E6.3.1-6	RNA45S5	-0.703339978
lnc-LAT2-2	RNA45S5	-0.714726306
lnc-LRRC38-2	RNA45S5	-0.68707577
lnc-PHLDB1-1	RNA45S5	-0.698703816
lnc-RAPH1-6	RNA45S5	-0.710414325
lnc-SERHL2-7	RNA45S5	-0.716787149
lnc-TICAM1-1	RNA45S5	-0.693500071
XLOC_1093926	RNA45S5	-0.692959535
XLOC_2394941	RNA45S5	-0.717061926
XLOC_515910	RNA45S5	-0.710259648
lnc-AP3S1-15	COL4A3BP	0.805754917
lnc-CDK12-2	COL4A3BP	0.856438298
lnc-CSNK1A1-7	COL4A3BP	0.800970397
lnc-EEF1B2-3	COL4A3BP	0.86937143
lnc-FOXN1-1	COL4A3BP	0.831252838
lnc-GNS-3	COL4A3BP	0.857354769
lnc-IL31RA-1	COL4A3BP	0.850958064
lnc-KB-1980E6.3.1-6	COL4A3BP	0.954824212
lnc-LAT2-2	COL4A3BP	0.869205645
lnc-LRRC38-2	COL4A3BP	0.798296115
lnc-NLRP2-2	COL4A3BP	0.738421997
lnc-PHLDB1-1	COL4A3BP	0.859518155
lnc-RAPH1-6	COL4A3BP	0.861432351
lnc-SERHL2-7	COL4A3BP	0.843059827
lnc-SLA2-1	COL4A3BP	0.70464459
lnc-SLC46A2-1	COL4A3BP	0.773341888
lnc-TICAM1-1	COL4A3BP	0.843518783
XLOC_1093926	COL4A3BP	0.854911782
XLOC_2394941	COL4A3BP	0.863469452
XLOC_515910	COL4A3BP	0.733634686
lnc-AP3S1-15	MTOR-AS1	0.975355052
lnc-CDK12-2	MTOR-AS1	0.914990076
lnc-CSNK1A1-7	MTOR-AS1	0.986943012
lnc-EEF1B2-3	MTOR-AS1	0.916269044
lnc-FOXN1-1	MTOR-AS1	0.877692829
lnc-GNS-3	MTOR-AS1	0.921659349
lnc-IL31RA-1	MTOR-AS1	0.926056504
lnc-KB-1980E6.3.1-6	MTOR-AS1	0.864406965
lnc-LAT2-2	MTOR-AS1	0.912570576
lnc-LRRC38-2	MTOR-AS1	0.987766992
lnc-NLRP2-2	MTOR-AS1	0.988414704
lnc-PHLDB1-1	MTOR-AS1	0.925321717
lnc-RAPH1-6	MTOR-AS1	0.924636694
lnc-SERHL2-7	MTOR-AS1	0.920686157
lnc-SLA2-1	MTOR-AS1	0.982309443
lnc-SLC46A2-1	MTOR-AS1	0.997482324
lnc-TICAM1-1	MTOR-AS1	0.928094515
XLOC_1093926	MTOR-AS1	0.928652859
XLOC_2394941	MTOR-AS1	0.891607304
XLOC_515910	MTOR-AS1	0.822603651
lnc-AP3S1-15	SNRK-AS1	0.886197307
lnc-CDK12-2	SNRK-AS1	0.937733608
lnc-CSNK1A1-7	SNRK-AS1	0.905237782
lnc-EEF1B2-3	SNRK-AS1	0.929685286
lnc-FOXN1-1	SNRK-AS1	0.915701544
lnc-GNS-3	SNRK-AS1	0.928235918
lnc-IL31RA-1	SNRK-AS1	0.948889979
lnc-KB-1980E6.3.1-6	SNRK-AS1	0.841593998
lnc-LAT2-2	SNRK-AS1	0.916191992
lnc-LRRC38-2	SNRK-AS1	0.882581262
lnc-NLRP2-2	SNRK-AS1	0.819534149
lnc-PHLDB1-1	SNRK-AS1	0.936468246
lnc-RAPH1-6	SNRK-AS1	0.942453728
lnc-SERHL2-7	SNRK-AS1	0.949347621
lnc-SLA2-1	SNRK-AS1	0.784406966
lnc-SLC46A2-1	SNRK-AS1	0.892436405
lnc-TICAM1-1	SNRK-AS1	0.95357294
XLOC_1093926	SNRK-AS1	0.944239775
XLOC_2394941	SNRK-AS1	0.891843306
XLOC_515910	SNRK-AS1	0.900879446
lnc-FOXN1-1	CDH11	-0.687713677
lnc-FOXN1-1	C5orf66	0.701262009
XLOC_515910	C5orf66	0.694844892
lnc-AP3S1-15	ADAM8	-0.72597722
lnc-CDK12-2	ADAM8	-0.729541809
lnc-CSNK1A1-7	ADAM8	-0.690170508
lnc-EEF1B2-3	ADAM8	-0.738487059
lnc-FOXN1-1	ADAM8	-0.700700936
lnc-GNS-3	ADAM8	-0.72883909
lnc-IL31RA-1	ADAM8	-0.702596155
lnc-KB-1980E6.3.1-6	ADAM8	-0.838968235
lnc-LAT2-2	ADAM8	-0.752359721
lnc-LRRC38-2	ADAM8	-0.703257301
lnc-PHLDB1-1	ADAM8	-0.720298914
lnc-RAPH1-6	ADAM8	-0.715579176
lnc-SERHL2-7	ADAM8	-0.705708174
XLOC_1093926	ADAM8	-0.703827764
XLOC_2394941	ADAM8	-0.761356567
lnc-AP3S1-15	ACTR1A	0.856340527
lnc-CDK12-2	ACTR1A	0.81595021
lnc-CSNK1A1-7	ACTR1A	0.838150013
lnc-EEF1B2-3	ACTR1A	0.798823839
lnc-FOXN1-1	ACTR1A	0.851470416
lnc-GNS-3	ACTR1A	0.817287123
lnc-IL31RA-1	ACTR1A	0.80494165
lnc-KB-1980E6.3.1-6	ACTR1A	0.726163939
lnc-LAT2-2	ACTR1A	0.809914399
lnc-LRRC38-2	ACTR1A	0.829410356
lnc-NLRP2-2	ACTR1A	0.820804304
lnc-PHLDB1-1	ACTR1A	0.806886394
lnc-RAPH1-6	ACTR1A	0.7940213
lnc-SERHL2-7	ACTR1A	0.821695425
lnc-SLA2-1	ACTR1A	0.811879743
lnc-SLC46A2-1	ACTR1A	0.834719871
lnc-TICAM1-1	ACTR1A	0.797553585
XLOC_1093926	ACTR1A	0.797432435
XLOC_2394941	ACTR1A	0.802370281
lnc-AP3S1-15	LRPPRC	0.786156244
lnc-CDK12-2	LRPPRC	0.688958687
lnc-CSNK1A1-7	LRPPRC	0.756563567
lnc-EEF1B2-3	LRPPRC	0.706869345
lnc-GNS-3	LRPPRC	0.702894242
lnc-KB-1980E6.3.1-6	LRPPRC	0.77284587
lnc-LAT2-2	LRPPRC	0.718189138
lnc-LRRC38-2	LRPPRC	0.800273439
lnc-NLRP2-2	LRPPRC	0.831573484
lnc-PHLDB1-1	LRPPRC	0.696089568
lnc-SLA2-1	LRPPRC	0.835917592
lnc-SLC46A2-1	LRPPRC	0.773685878
XLOC_2394941	LRPPRC	0.731848155
lnc-AP3S1-15	TOB1	0.938116798
lnc-CDK12-2	TOB1	0.864760276
lnc-CSNK1A1-7	TOB1	0.925795081
lnc-EEF1B2-3	TOB1	0.860446083
lnc-FOXN1-1	TOB1	0.799529963
lnc-GNS-3	TOB1	0.863954101
lnc-IL31RA-1	TOB1	0.852871006
lnc-KB-1980E6.3.1-6	TOB1	0.878069959
lnc-LAT2-2	TOB1	0.869832031
lnc-LRRC38-2	TOB1	0.923218437
lnc-NLRP2-2	TOB1	0.932202452
lnc-PHLDB1-1	TOB1	0.859516354
lnc-RAPH1-6	TOB1	0.864523377
lnc-SERHL2-7	TOB1	0.857672308
lnc-SLA2-1	TOB1	0.935960126
lnc-SLC46A2-1	TOB1	0.918971719
lnc-TICAM1-1	TOB1	0.84422446
XLOC_1093926	TOB1	0.857070786
XLOC_2394941	TOB1	0.85149205
XLOC_515910	TOB1	0.724230164
lnc-CSNK1A1-7	MMP24-AS1	0.691021963
lnc-SLA2-1	MMP24-AS1	0.697193991
lnc-NLRP2-2	G3BP1	0.699717643
lnc-SLA2-1	G3BP1	0.702835724
lnc-AP3S1-15	CEBPZ	0.975677769
lnc-CDK12-2	CEBPZ	0.92180442
lnc-CSNK1A1-7	CEBPZ	0.969515684
lnc-EEF1B2-3	CEBPZ	0.913598516
lnc-FOXN1-1	CEBPZ	0.862694676
lnc-GNS-3	CEBPZ	0.911582255
lnc-IL31RA-1	CEBPZ	0.917938182
lnc-KB-1980E6.3.1-6	CEBPZ	0.852821436
lnc-LAT2-2	CEBPZ	0.909507766
lnc-LRRC38-2	CEBPZ	0.977376355
lnc-NLRP2-2	CEBPZ	0.976068058
lnc-PHLDB1-1	CEBPZ	0.913079328
lnc-RAPH1-6	CEBPZ	0.915268023
lnc-SERHL2-7	CEBPZ	0.924104263
lnc-SLA2-1	CEBPZ	0.96944476
lnc-SLC46A2-1	CEBPZ	0.98226234
lnc-TICAM1-1	CEBPZ	0.914525181
XLOC_1093926	CEBPZ	0.912465195
XLOC_2394941	CEBPZ	0.894885805
XLOC_515910	CEBPZ	0.806803778
lnc-CDK12-2	PDZK1IP1	-0.707728392
lnc-EEF1B2-3	PDZK1IP1	-0.690414316
lnc-GNS-3	PDZK1IP1	-0.707468245
lnc-IL31RA-1	PDZK1IP1	-0.703968616
lnc-LAT2-2	PDZK1IP1	-0.69469928
lnc-PHLDB1-1	PDZK1IP1	-0.700501337
lnc-SERHL2-7	PDZK1IP1	-0.719166858
lnc-TICAM1-1	PDZK1IP1	-0.700944717
XLOC_1093926	PDZK1IP1	-0.693199971
XLOC_2394941	PDZK1IP1	-0.689552787
lnc-AP3S1-15	SERF2	0.940934233
lnc-CDK12-2	SERF2	0.894841171
lnc-CSNK1A1-7	SERF2	0.905215654
lnc-EEF1B2-3	SERF2	0.894566252
lnc-FOXN1-1	SERF2	0.859314088
lnc-GNS-3	SERF2	0.895384168
lnc-IL31RA-1	SERF2	0.876791399
lnc-KB-1980E6.3.1-6	SERF2	0.846917619
lnc-LAT2-2	SERF2	0.902751304
lnc-LRRC38-2	SERF2	0.935121576
lnc-NLRP2-2	SERF2	0.930360174
lnc-PHLDB1-1	SERF2	0.886314041
lnc-RAPH1-6	SERF2	0.866555894
lnc-SERHL2-7	SERF2	0.886281008
lnc-SLA2-1	SERF2	0.91563615
lnc-SLC46A2-1	SERF2	0.917713528
lnc-TICAM1-1	SERF2	0.863175738
XLOC_1093926	SERF2	0.866774055
XLOC_2394941	SERF2	0.916495254
XLOC_515910	SERF2	0.75197331
lnc-CDK12-2	STAG3L5P-PVRIG2P-PILRB	0.692518805
lnc-RAPH1-6	STAG3L5P-PVRIG2P-PILRB	0.687442822
lnc-SERHL2-7	STAG3L5P-PVRIG2P-PILRB	0.693324765
lnc-CSNK1A1-7	TNK2	0.688186448
lnc-KB-1980E6.3.1-6	TNK2	0.728663761
lnc-RAPH1-6	TNK2	0.710121027
XLOC_1093926	TNK2	0.69148627
XLOC_515910	TNK2	0.787129864
lnc-AP3S1-15	CDK4	0.831917511
lnc-CDK12-2	CDK4	0.813190526
lnc-CSNK1A1-7	CDK4	0.848259356
lnc-EEF1B2-3	CDK4	0.823552442
lnc-FOXN1-1	CDK4	0.7956299
lnc-GNS-3	CDK4	0.831525459
lnc-IL31RA-1	CDK4	0.821191875
lnc-KB-1980E6.3.1-6	CDK4	0.900138873
lnc-LAT2-2	CDK4	0.830959904
lnc-LRRC38-2	CDK4	0.823097924
lnc-NLRP2-2	CDK4	0.799966228
lnc-PHLDB1-1	CDK4	0.832343716
lnc-RAPH1-6	CDK4	0.838570975
lnc-SERHL2-7	CDK4	0.808462882
lnc-SLA2-1	CDK4	0.789848801
lnc-SLC46A2-1	CDK4	0.816113114
lnc-TICAM1-1	CDK4	0.820190663
XLOC_1093926	CDK4	0.837422428
XLOC_2394941	CDK4	0.802759545
XLOC_515910	CDK4	0.701249865
lnc-AP3S1-15	CTB-118N6.3	0.704353915
lnc-CDK12-2	CTB-118N6.3	0.754497555
lnc-EEF1B2-3	CTB-118N6.3	0.745956406
lnc-FOXN1-1	CTB-118N6.3	0.693712948
lnc-GNS-3	CTB-118N6.3	0.718744025
lnc-IL31RA-1	CTB-118N6.3	0.73566965
lnc-KB-1980E6.3.1-6	CTB-118N6.3	0.726632948
lnc-LAT2-2	CTB-118N6.3	0.732515844
lnc-LRRC38-2	CTB-118N6.3	0.697227373
lnc-PHLDB1-1	CTB-118N6.3	0.724548186
lnc-RAPH1-6	CTB-118N6.3	0.736625272
lnc-SERHL2-7	CTB-118N6.3	0.746655797
lnc-SLC46A2-1	CTB-118N6.3	0.686193506
lnc-TICAM1-1	CTB-118N6.3	0.727317995
XLOC_1093926	CTB-118N6.3	0.721829797
XLOC_2394941	CTB-118N6.3	0.731301711
XLOC_515910	CTB-118N6.3	0.690904486
lnc-AP3S1-15	LOC101927905	0.940359251
lnc-CDK12-2	LOC101927905	0.966355524
lnc-CSNK1A1-7	LOC101927905	0.964194712
lnc-EEF1B2-3	LOC101927905	0.958384343
lnc-FOXN1-1	LOC101927905	0.957590543
lnc-GNS-3	LOC101927905	0.96790927
lnc-IL31RA-1	LOC101927905	0.97570273
lnc-KB-1980E6.3.1-6	LOC101927905	0.925607918
lnc-LAT2-2	LOC101927905	0.957359698
lnc-LRRC38-2	LOC101927905	0.918163307
lnc-NLRP2-2	LOC101927905	0.864598758
lnc-PHLDB1-1	LOC101927905	0.971712558
lnc-RAPH1-6	LOC101927905	0.984306378
lnc-SERHL2-7	LOC101927905	0.974305139
lnc-SLA2-1	LOC101927905	0.84136777
lnc-SLC46A2-1	LOC101927905	0.927800393
lnc-TICAM1-1	LOC101927905	0.978653555
XLOC_1093926	LOC101927905	0.983077601
XLOC_2394941	LOC101927905	0.917785614
XLOC_515910	LOC101927905	0.913774318
lnc-LRRC38-2	LOC101927911	0.689636495
lnc-NLRP2-2	LOC101927911	0.695344928
lnc-SLA2-1	LOC101927911	0.696092513
lnc-AP3S1-15	LOC101928069	0.734263105
lnc-CDK12-2	LOC101928069	0.734965977
lnc-CSNK1A1-7	LOC101928069	0.741320947
lnc-EEF1B2-3	LOC101928069	0.72670786
lnc-FOXN1-1	LOC101928069	0.828125542
lnc-GNS-3	LOC101928069	0.754418864
lnc-IL31RA-1	LOC101928069	0.747436974
lnc-LAT2-2	LOC101928069	0.731802046
lnc-LRRC38-2	LOC101928069	0.723076235
lnc-NLRP2-2	LOC101928069	0.692564239
lnc-PHLDB1-1	LOC101928069	0.74839752
lnc-RAPH1-6	LOC101928069	0.725284619
lnc-SERHL2-7	LOC101928069	0.751998341
lnc-SLC46A2-1	LOC101928069	0.735226252
lnc-TICAM1-1	LOC101928069	0.750038312
XLOC_1093926	LOC101928069	0.742624126
XLOC_2394941	LOC101928069	0.723719112
lnc-AP3S1-15	C21orf140	0.894439431
lnc-CDK12-2	C21orf140	0.757857877
lnc-CSNK1A1-7	C21orf140	0.870719544
lnc-EEF1B2-3	C21orf140	0.760222021
lnc-FOXN1-1	C21orf140	0.688900715
lnc-GNS-3	C21orf140	0.770290444
lnc-IL31RA-1	C21orf140	0.748090604
lnc-KB-1980E6.3.1-6	C21orf140	0.716675218
lnc-LAT2-2	C21orf140	0.773501149
lnc-LRRC38-2	C21orf140	0.899491018
lnc-NLRP2-2	C21orf140	0.949203025
lnc-PHLDB1-1	C21orf140	0.761279509
lnc-RAPH1-6	C21orf140	0.747272021
lnc-SERHL2-7	C21orf140	0.751157074
lnc-SLA2-1	C21orf140	0.965095062
lnc-SLC46A2-1	C21orf140	0.893110636
lnc-TICAM1-1	C21orf140	0.738348109
XLOC_1093926	C21orf140	0.748837953
XLOC_2394941	C21orf140	0.773723735
lnc-AP3S1-15	LOC101928371	0.965974142
lnc-CDK12-2	LOC101928371	0.894897341
lnc-CSNK1A1-7	LOC101928371	0.965906384
lnc-EEF1B2-3	LOC101928371	0.902343943
lnc-FOXN1-1	LOC101928371	0.850088239
lnc-GNS-3	LOC101928371	0.903645451
lnc-IL31RA-1	LOC101928371	0.902031439
lnc-KB-1980E6.3.1-6	LOC101928371	0.854618152
lnc-LAT2-2	LOC101928371	0.899445314
lnc-LRRC38-2	LOC101928371	0.98731613
lnc-NLRP2-2	LOC101928371	0.997159343
lnc-PHLDB1-1	LOC101928371	0.90560065
lnc-RAPH1-6	LOC101928371	0.896629684
lnc-SERHL2-7	LOC101928371	0.895564134
lnc-SLA2-1	LOC101928371	0.98954202
lnc-SLC46A2-1	LOC101928371	0.985365222
lnc-TICAM1-1	LOC101928371	0.900811402
XLOC_1093926	LOC101928371	0.901670009
XLOC_2394941	LOC101928371	0.892513858
XLOC_515910	LOC101928371	0.794997652
lnc-FOXN1-1	LOC101929231	0.704760479
lnc-NLRP2-2	TRIM13	0.72169436
lnc-SLA2-1	TRIM13	0.746869358
lnc-AP3S1-15	TOPORS	0.908220838
lnc-CDK12-2	TOPORS	0.960920181
lnc-CSNK1A1-7	TOPORS	0.898075192
lnc-EEF1B2-3	TOPORS	0.96020588
lnc-FOXN1-1	TOPORS	0.930747065
lnc-GNS-3	TOPORS	0.9527542
lnc-IL31RA-1	TOPORS	0.94924492
lnc-KB-1980E6.3.1-6	TOPORS	0.918648289
lnc-LAT2-2	TOPORS	0.961249589
lnc-LRRC38-2	TOPORS	0.885336958
lnc-NLRP2-2	TOPORS	0.820272534
lnc-PHLDB1-1	TOPORS	0.952290707
lnc-RAPH1-6	TOPORS	0.955674329
lnc-SERHL2-7	TOPORS	0.952497033
lnc-SLA2-1	TOPORS	0.78543078
lnc-SLC46A2-1	TOPORS	0.868962223
lnc-TICAM1-1	TOPORS	0.94050113
XLOC_1093926	TOPORS	0.947766574
XLOC_2394941	TOPORS	0.950853444
XLOC_515910	TOPORS	0.973122269
lnc-AP3S1-15	GDF11	0.747792365
lnc-CSNK1A1-7	GDF11	0.755592263
lnc-EEF1B2-3	GDF11	0.688280458
lnc-GNS-3	GDF11	0.687712264
lnc-IL31RA-1	GDF11	0.686345678
lnc-KB-1980E6.3.1-6	GDF11	0.742376557
lnc-LAT2-2	GDF11	0.69007289
lnc-LRRC38-2	GDF11	0.750812842
lnc-NLRP2-2	GDF11	0.761058706
lnc-PHLDB1-1	GDF11	0.690507682
lnc-RAPH1-6	GDF11	0.701588231
lnc-SLA2-1	GDF11	0.766652837
lnc-SLC46A2-1	GDF11	0.749121305
XLOC_1093926	GDF11	0.696296868
lnc-AP3S1-15	COQ7	0.94461666
lnc-CDK12-2	COQ7	0.958891333
lnc-CSNK1A1-7	COQ7	0.922598415
lnc-EEF1B2-3	COQ7	0.958545603
lnc-FOXN1-1	COQ7	0.940360825
lnc-GNS-3	COQ7	0.970589626
lnc-IL31RA-1	COQ7	0.943874176
lnc-KB-1980E6.3.1-6	COQ7	0.936820656
lnc-LAT2-2	COQ7	0.975508231
lnc-LRRC38-2	COQ7	0.910123883
lnc-NLRP2-2	COQ7	0.863904979
lnc-PHLDB1-1	COQ7	0.959022895
lnc-RAPH1-6	COQ7	0.944463433
lnc-SERHL2-7	COQ7	0.950373542
lnc-SLA2-1	COQ7	0.836279668
lnc-SLC46A2-1	COQ7	0.890776732
lnc-TICAM1-1	COQ7	0.930960751
XLOC_1093926	COQ7	0.944302521
XLOC_2394941	COQ7	0.973419449
XLOC_515910	COQ7	0.871646066
XLOC_2394941	AP3S2	0.732482333
lnc-CSNK1A1-7	GPHN	0.694696489
lnc-KB-1980E6.3.1-6	GPHN	0.72666079
lnc-LRRC38-2	GPHN	0.693669035
lnc-NLRP2-2	GPHN	0.712870184
lnc-SLA2-1	GPHN	0.72263543
lnc-SLC46A2-1	GPHN	0.692786436
lnc-AP3S1-15	TIMM17B	0.732398781
lnc-CSNK1A1-7	TIMM17B	0.74916728
lnc-LRRC38-2	TIMM17B	0.749059636
lnc-NLRP2-2	TIMM17B	0.766663198
lnc-SLA2-1	TIMM17B	0.77372706
lnc-SLC46A2-1	TIMM17B	0.751737152
XLOC_515910	TIMM17B	0.737000935
lnc-NLRP2-2	AKAP8	0.738346187
lnc-SLA2-1	AKAP8	0.767873213
lnc-AP3S1-15	LOC102724153	-0.695117245
lnc-CDK12-2	LOC102724153	-0.754844263
lnc-EEF1B2-3	LOC102724153	-0.739493399
lnc-FOXN1-1	LOC102724153	-0.698417313
lnc-GNS-3	LOC102724153	-0.724370451
lnc-IL31RA-1	LOC102724153	-0.703592614
lnc-KB-1980E6.3.1-6	LOC102724153	-0.709491013
lnc-LAT2-2	LOC102724153	-0.753590738
lnc-PHLDB1-1	LOC102724153	-0.710714424
lnc-RAPH1-6	LOC102724153	-0.710292322
lnc-SERHL2-7	LOC102724153	-0.731519153
XLOC_1093926	LOC102724153	-0.689105284
XLOC_2394941	LOC102724153	-0.768512902
XLOC_515910	LOC102724153	-0.743764722
lnc-LAT2-2	SAP18	0.694509847
lnc-LRRC38-2	SAP18	0.68745502
XLOC_2394941	SAP18	0.743453865
lnc-AP3S1-15	BCAS2	0.962967978
lnc-CDK12-2	BCAS2	0.995626866
lnc-CSNK1A1-7	BCAS2	0.960122908
lnc-EEF1B2-3	BCAS2	0.997435623
lnc-FOXN1-1	BCAS2	0.971260867
lnc-GNS-3	BCAS2	0.995754116
lnc-IL31RA-1	BCAS2	0.992244052
lnc-KB-1980E6.3.1-6	BCAS2	0.97587172
lnc-LAT2-2	BCAS2	0.997134707
lnc-LRRC38-2	BCAS2	0.949480189
lnc-NLRP2-2	BCAS2	0.894158685
lnc-PHLDB1-1	BCAS2	0.99551445
lnc-RAPH1-6	BCAS2	0.993987943
lnc-SERHL2-7	BCAS2	0.991878609
lnc-SLA2-1	BCAS2	0.86184361
lnc-SLC46A2-1	BCAS2	0.938307648
lnc-TICAM1-1	BCAS2	0.986825192
XLOC_1093926	BCAS2	0.991850405
XLOC_2394941	BCAS2	0.985171879
XLOC_515910	BCAS2	0.927038414
lnc-AP3S1-15	PAK4	0.81316058
lnc-CDK12-2	PAK4	0.764163666
lnc-CSNK1A1-7	PAK4	0.816153886
lnc-EEF1B2-3	PAK4	0.773495851
lnc-FOXN1-1	PAK4	0.706919117
lnc-GNS-3	PAK4	0.761903551
lnc-IL31RA-1	PAK4	0.765093119
lnc-KB-1980E6.3.1-6	PAK4	0.696917385
lnc-LAT2-2	PAK4	0.768997514
lnc-LRRC38-2	PAK4	0.827413123
lnc-NLRP2-2	PAK4	0.828747036
lnc-PHLDB1-1	PAK4	0.767840648
lnc-RAPH1-6	PAK4	0.777826231
lnc-SERHL2-7	PAK4	0.756064473
lnc-SLA2-1	PAK4	0.825797491
lnc-SLC46A2-1	PAK4	0.81970799
lnc-TICAM1-1	PAK4	0.762419591
XLOC_1093926	PAK4	0.770993262
XLOC_2394941	PAK4	0.753059718
XLOC_515910	PAK4	0.88728081
lnc-FOXN1-1	KATNB1	-0.779829176
lnc-AP3S1-15	SNAPC5	0.90132754
lnc-CDK12-2	SNAPC5	0.863502701
lnc-CSNK1A1-7	SNAPC5	0.901747
lnc-EEF1B2-3	SNAPC5	0.855950036
lnc-FOXN1-1	SNAPC5	0.891046481
lnc-GNS-3	SNAPC5	0.8736787
lnc-IL31RA-1	SNAPC5	0.870788984
lnc-KB-1980E6.3.1-6	SNAPC5	0.771421607
lnc-LAT2-2	SNAPC5	0.857527776
lnc-LRRC38-2	SNAPC5	0.900087355
lnc-NLRP2-2	SNAPC5	0.889003049
lnc-PHLDB1-1	SNAPC5	0.87007357
lnc-RAPH1-6	SNAPC5	0.85310167
lnc-SERHL2-7	SNAPC5	0.875766993
lnc-SLA2-1	SNAPC5	0.873937397
lnc-SLC46A2-1	SNAPC5	0.91007352
lnc-TICAM1-1	SNAPC5	0.871074539
XLOC_1093926	SNAPC5	0.864680984
XLOC_2394941	SNAPC5	0.848845171
XLOC_515910	SNAPC5	0.714314117
lnc-AP3S1-15	PCGF3	0.698889363
lnc-CSNK1A1-7	PCGF3	0.691277421
lnc-LRRC38-2	PCGF3	0.713047956
lnc-NLRP2-2	PCGF3	0.728375835
lnc-SLA2-1	PCGF3	0.725512572
lnc-SLC46A2-1	PCGF3	0.72041247
lnc-FOXN1-1	TRDN	-0.753699598
lnc-SERHL2-7	TRDN	-0.687096738
lnc-CDK12-2	ABCA8	-0.713809542
lnc-EEF1B2-3	ABCA8	-0.699069564
lnc-GNS-3	ABCA8	-0.71213508
lnc-IL31RA-1	ABCA8	-0.709738944
lnc-LAT2-2	ABCA8	-0.702476738
lnc-PHLDB1-1	ABCA8	-0.706804066
lnc-RAPH1-6	ABCA8	-0.696923246
lnc-SERHL2-7	ABCA8	-0.72241932
lnc-TICAM1-1	ABCA8	-0.706525912
XLOC_1093926	ABCA8	-0.70139219
XLOC_2394941	ABCA8	-0.694707833
lnc-EEF1B2-3	IRF9	0.696301842
lnc-GNS-3	IRF9	0.705818614
lnc-KB-1980E6.3.1-6	IRF9	0.706878477
lnc-LAT2-2	IRF9	0.71658592
lnc-PHLDB1-1	IRF9	0.690995941
XLOC_2394941	IRF9	0.754616055
XLOC_2394941	CDR1	0.692275741
lnc-EEF1B2-3	TUBB4B	0.6954469
lnc-GNS-3	TUBB4B	0.711747673
lnc-KB-1980E6.3.1-6	TUBB4B	0.700439196
lnc-LAT2-2	TUBB4B	0.726846824
lnc-PHLDB1-1	TUBB4B	0.688908921
XLOC_2394941	TUBB4B	0.761779698
lnc-AP3S1-15	CEPT1	0.871240437
lnc-CDK12-2	CEPT1	0.817887071
lnc-CSNK1A1-7	CEPT1	0.878304956
lnc-EEF1B2-3	CEPT1	0.818663287
lnc-FOXN1-1	CEPT1	0.758875098
lnc-GNS-3	CEPT1	0.811183563
lnc-IL31RA-1	CEPT1	0.819166648
lnc-KB-1980E6.3.1-6	CEPT1	0.737152317
lnc-LAT2-2	CEPT1	0.813785862
lnc-LRRC38-2	CEPT1	0.87780065
lnc-NLRP2-2	CEPT1	0.879050172
lnc-PHLDB1-1	CEPT1	0.81718537
lnc-RAPH1-6	CEPT1	0.831683633
lnc-SERHL2-7	CEPT1	0.814915457
lnc-SLA2-1	CEPT1	0.878566106
lnc-SLC46A2-1	CEPT1	0.879334148
lnc-TICAM1-1	CEPT1	0.818031592
XLOC_1093926	CEPT1	0.824254753
XLOC_2394941	CEPT1	0.788754564
XLOC_515910	CEPT1	0.89919654
lnc-EEF1B2-3	MYL12B	0.694920194
lnc-GNS-3	MYL12B	0.69847944
lnc-KB-1980E6.3.1-6	MYL12B	0.686520579
lnc-LAT2-2	MYL12B	0.713667265
XLOC_2394941	MYL12B	0.758380276
lnc-AP3S1-15	ANAPC10	0.848845256
lnc-CDK12-2	ANAPC10	0.783695622
lnc-CSNK1A1-7	ANAPC10	0.854039029
lnc-EEF1B2-3	ANAPC10	0.789134268
lnc-FOXN1-1	ANAPC10	0.722053487
lnc-GNS-3	ANAPC10	0.77833001
lnc-IL31RA-1	ANAPC10	0.787711106
lnc-KB-1980E6.3.1-6	ANAPC10	0.712100695
lnc-LAT2-2	ANAPC10	0.780792869
lnc-LRRC38-2	ANAPC10	0.869809286
lnc-NLRP2-2	ANAPC10	0.880479379
lnc-PHLDB1-1	ANAPC10	0.785708517
lnc-RAPH1-6	ANAPC10	0.794954632
lnc-SERHL2-7	ANAPC10	0.780656426
lnc-SLA2-1	ANAPC10	0.880637676
lnc-SLC46A2-1	ANAPC10	0.86896018
lnc-TICAM1-1	ANAPC10	0.78730888
XLOC_1093926	ANAPC10	0.790242792
XLOC_2394941	ANAPC10	0.763885458
XLOC_515910	ANAPC10	0.824139314
lnc-AP3S1-15	GNB2L1	0.703108018
lnc-CDK12-2	GNB2L1	0.703893001
lnc-EEF1B2-3	GNB2L1	0.72343308
lnc-FOXN1-1	GNB2L1	0.694093694
lnc-GNS-3	GNB2L1	0.733227322
lnc-KB-1980E6.3.1-6	GNB2L1	0.722328575
lnc-LAT2-2	GNB2L1	0.749432077
lnc-LRRC38-2	GNB2L1	0.686344515
lnc-PHLDB1-1	GNB2L1	0.712562877
XLOC_2394941	GNB2L1	0.792306736
lnc-FOXN1-1	NDC80	-0.686740028
lnc-AP3S1-15	NSA2	0.880966612
lnc-CDK12-2	NSA2	0.92189016
lnc-CSNK1A1-7	NSA2	0.879512639
lnc-EEF1B2-3	NSA2	0.933024489
lnc-FOXN1-1	NSA2	0.912114978
lnc-GNS-3	NSA2	0.932115913
lnc-IL31RA-1	NSA2	0.92141896
lnc-KB-1980E6.3.1-6	NSA2	0.888141524
lnc-LAT2-2	NSA2	0.936316606
lnc-LRRC38-2	NSA2	0.871186444
lnc-NLRP2-2	NSA2	0.812899203
lnc-PHLDB1-1	NSA2	0.93155093
lnc-RAPH1-6	NSA2	0.925698745
lnc-SERHL2-7	NSA2	0.914082946
lnc-SLA2-1	NSA2	0.778311044
lnc-SLC46A2-1	NSA2	0.851661006
lnc-TICAM1-1	NSA2	0.915585416
XLOC_1093926	NSA2	0.925558508
XLOC_2394941	NSA2	0.929247223
XLOC_515910	NSA2	0.969958332
lnc-CDK12-2	UBAC1	-0.720141315
lnc-EEF1B2-3	UBAC1	-0.708372315
lnc-GNS-3	UBAC1	-0.716346696
lnc-IL31RA-1	UBAC1	-0.715355777
lnc-LAT2-2	UBAC1	-0.710775615
lnc-PHLDB1-1	UBAC1	-0.713027799
lnc-RAPH1-6	UBAC1	-0.709362075
lnc-SERHL2-7	UBAC1	-0.725093029
lnc-TICAM1-1	UBAC1	-0.711808162
XLOC_1093926	UBAC1	-0.710085002
XLOC_2394941	UBAC1	-0.699468965
lnc-AP3S1-15	LYPLA1	0.84565994
lnc-CDK12-2	LYPLA1	0.826206826
lnc-CSNK1A1-7	LYPLA1	0.844579241
lnc-EEF1B2-3	LYPLA1	0.836992683
lnc-FOXN1-1	LYPLA1	0.784651616
lnc-GNS-3	LYPLA1	0.832518568
lnc-IL31RA-1	LYPLA1	0.823399853
lnc-KB-1980E6.3.1-6	LYPLA1	0.922707498
lnc-LAT2-2	LYPLA1	0.841031007
lnc-LRRC38-2	LYPLA1	0.842553026
lnc-NLRP2-2	LYPLA1	0.82250226
lnc-PHLDB1-1	LYPLA1	0.833353734
lnc-RAPH1-6	LYPLA1	0.837989982
lnc-SERHL2-7	LYPLA1	0.815059593
lnc-SLA2-1	LYPLA1	0.810233817
lnc-SLC46A2-1	LYPLA1	0.827053486
lnc-TICAM1-1	LYPLA1	0.817416602
XLOC_1093926	LYPLA1	0.832166718
XLOC_2394941	LYPLA1	0.826516136
XLOC_515910	LYPLA1	0.687383168
lnc-AP3S1-15	EMG1	0.85212188
lnc-CDK12-2	EMG1	0.783131732
lnc-CSNK1A1-7	EMG1	0.84386797
lnc-EEF1B2-3	EMG1	0.779055305
lnc-FOXN1-1	EMG1	0.71484346
lnc-GNS-3	EMG1	0.779277141
lnc-IL31RA-1	EMG1	0.770694288
lnc-KB-1980E6.3.1-6	EMG1	0.83755727
lnc-LAT2-2	EMG1	0.787916381
lnc-LRRC38-2	EMG1	0.8348668
lnc-NLRP2-2	EMG1	0.844100213
lnc-PHLDB1-1	EMG1	0.776604491
lnc-RAPH1-6	EMG1	0.78964846
lnc-SERHL2-7	EMG1	0.774019339
lnc-SLA2-1	EMG1	0.851548801
lnc-SLC46A2-1	EMG1	0.830195862
lnc-TICAM1-1	EMG1	0.762575221
XLOC_1093926	EMG1	0.778271543
XLOC_2394941	EMG1	0.764005252
lnc-EEF1B2-3	TIMM17A	0.707239322
lnc-GNS-3	TIMM17A	0.694692464
lnc-KB-1980E6.3.1-6	TIMM17A	0.718619335
lnc-LAT2-2	TIMM17A	0.717378675
XLOC_2394941	TIMM17A	0.776248196
lnc-CDK12-2	VAV3	-0.69565494
lnc-FOXN1-1	VAV3	-0.793803692
lnc-GNS-3	VAV3	-0.692728222
lnc-IL31RA-1	VAV3	-0.691786835
lnc-LAT2-2	VAV3	-0.687260214
lnc-PHLDB1-1	VAV3	-0.689781558
lnc-SERHL2-7	VAV3	-0.700369892
lnc-TICAM1-1	VAV3	-0.688575831
XLOC_1093926	VAV3	-0.686874497
lnc-AP3S1-15	ECI2	0.749915715
lnc-CDK12-2	ECI2	0.77063381
lnc-CSNK1A1-7	ECI2	0.707661267
lnc-EEF1B2-3	ECI2	0.789728868
lnc-FOXN1-1	ECI2	0.751399358
lnc-GNS-3	ECI2	0.791301308
lnc-IL31RA-1	ECI2	0.748223756
lnc-KB-1980E6.3.1-6	ECI2	0.847922602
lnc-LAT2-2	ECI2	0.810464893
lnc-LRRC38-2	ECI2	0.730448843
lnc-NLRP2-2	ECI2	0.689321584
lnc-PHLDB1-1	ECI2	0.776634128
lnc-RAPH1-6	ECI2	0.747660803
lnc-SERHL2-7	ECI2	0.746996136
lnc-TICAM1-1	ECI2	0.728426483
XLOC_1093926	ECI2	0.747946434
XLOC_2394941	ECI2	0.837759845
lnc-EEF1B2-3	HAX1	0.701855576
lnc-GNS-3	HAX1	0.697191478
lnc-KB-1980E6.3.1-6	HAX1	0.710032885
lnc-LAT2-2	HAX1	0.723279466
XLOC_2394941	HAX1	0.777301321
lnc-AP3S1-15	TACC3	-0.958267504
lnc-CDK12-2	TACC3	-0.9577757
lnc-CSNK1A1-7	TACC3	-0.953408838
lnc-EEF1B2-3	TACC3	-0.946483829
lnc-FOXN1-1	TACC3	-0.904818737
lnc-GNS-3	TACC3	-0.953810577
lnc-IL31RA-1	TACC3	-0.953392451
lnc-KB-1980E6.3.1-6	TACC3	-0.866819763
lnc-LAT2-2	TACC3	-0.948167165
lnc-LRRC38-2	TACC3	-0.939236237
lnc-NLRP2-2	TACC3	-0.903759105
lnc-PHLDB1-1	TACC3	-0.951250214
lnc-RAPH1-6	TACC3	-0.948293688
lnc-SERHL2-7	TACC3	-0.962363366
lnc-SLA2-1	TACC3	-0.882073613
lnc-SLC46A2-1	TACC3	-0.942172574
lnc-TICAM1-1	TACC3	-0.949218875
XLOC_1093926	TACC3	-0.948486582
XLOC_2394941	TACC3	-0.932582978
XLOC_515910	TACC3	-0.86872139
lnc-NLRP2-2	CLEC10A	-0.686854683
lnc-SLA2-1	CLEC10A	-0.694036766
lnc-FOXN1-1	TADA3	0.698955843
lnc-FOXN1-1	SLC9A6	-0.786411724
lnc-SERHL2-7	SLC9A6	-0.690998467
lnc-AP3S1-15	STK25	0.840668253
lnc-CDK12-2	STK25	0.77640685
lnc-CSNK1A1-7	STK25	0.836481949
lnc-EEF1B2-3	STK25	0.780823467
lnc-FOXN1-1	STK25	0.750069487
lnc-GNS-3	STK25	0.787515755
lnc-IL31RA-1	STK25	0.771963214
lnc-KB-1980E6.3.1-6	STK25	0.850230598
lnc-LAT2-2	STK25	0.791809819
lnc-LRRC38-2	STK25	0.831145393
lnc-NLRP2-2	STK25	0.837460935
lnc-PHLDB1-1	STK25	0.783571817
lnc-RAPH1-6	STK25	0.78514742
lnc-SERHL2-7	STK25	0.768636739
lnc-SLA2-1	STK25	0.840558862
lnc-SLC46A2-1	STK25	0.823384222
lnc-TICAM1-1	STK25	0.76549984
XLOC_1093926	STK25	0.78155483
XLOC_2394941	STK25	0.774345026
lnc-AP3S1-15	CARM1	0.90346921
lnc-CDK12-2	CARM1	0.793122024
lnc-CSNK1A1-7	CARM1	0.897469501
lnc-EEF1B2-3	CARM1	0.796016252
lnc-FOXN1-1	CARM1	0.71734998
lnc-GNS-3	CARM1	0.787962369
lnc-IL31RA-1	CARM1	0.795569468
lnc-KB-1980E6.3.1-6	CARM1	0.740486458
lnc-LAT2-2	CARM1	0.787336912
lnc-LRRC38-2	CARM1	0.936054395
lnc-NLRP2-2	CARM1	0.973752573
lnc-PHLDB1-1	CARM1	0.792695633
lnc-RAPH1-6	CARM1	0.790581068
lnc-SERHL2-7	CARM1	0.793180025
lnc-SLA2-1	CARM1	0.981172835
lnc-SLC46A2-1	CARM1	0.939275763
lnc-TICAM1-1	CARM1	0.794125198
XLOC_1093926	CARM1	0.790715399
XLOC_2394941	CARM1	0.782036216
lnc-FOXN1-1	SEMA6B	-0.764641592
lnc-CDK12-2	MYBBP1A	-0.695063901
lnc-EEF1B2-3	MYBBP1A	-0.687170882
lnc-FOXN1-1	MYBBP1A	-0.757074722
lnc-GNS-3	MYBBP1A	-0.701773971
lnc-LAT2-2	MYBBP1A	-0.705341724
lnc-SERHL2-7	MYBBP1A	-0.689636381
XLOC_2394941	MYBBP1A	-0.727457905
lnc-CDK12-2	KAT5	0.785621094
lnc-CSNK1A1-7	KAT5	0.69057429
lnc-EEF1B2-3	KAT5	0.777344307
lnc-FOXN1-1	KAT5	0.850488715
lnc-GNS-3	KAT5	0.78679214
lnc-IL31RA-1	KAT5	0.790082259
lnc-LAT2-2	KAT5	0.77675886
lnc-PHLDB1-1	KAT5	0.786849219
lnc-RAPH1-6	KAT5	0.785547372
lnc-SERHL2-7	KAT5	0.7936837
lnc-TICAM1-1	KAT5	0.790558072
XLOC_1093926	KAT5	0.788670872
XLOC_2394941	KAT5	0.75777092
XLOC_515910	KAT5	0.869148977
lnc-AP3S1-15	NOP56	0.885035372
lnc-CDK12-2	NOP56	0.905566422
lnc-CSNK1A1-7	NOP56	0.88975535
lnc-EEF1B2-3	NOP56	0.925646996
lnc-FOXN1-1	NOP56	0.91156964
lnc-GNS-3	NOP56	0.931842473
lnc-IL31RA-1	NOP56	0.916862106
lnc-KB-1980E6.3.1-6	NOP56	0.915560301
lnc-LAT2-2	NOP56	0.928797907
lnc-LRRC38-2	NOP56	0.893051571
lnc-NLRP2-2	NOP56	0.846559868
lnc-PHLDB1-1	NOP56	0.931161121
lnc-RAPH1-6	NOP56	0.912140613
lnc-SERHL2-7	NOP56	0.901702857
lnc-SLA2-1	NOP56	0.812113006
lnc-SLC46A2-1	NOP56	0.874078996
lnc-TICAM1-1	NOP56	0.914538634
XLOC_1093926	NOP56	0.92210718
XLOC_2394941	NOP56	0.928688329
XLOC_515910	NOP56	0.853397234
lnc-NLRP2-2	ATG7	0.692856364
lnc-SLA2-1	ATG7	0.690930435
lnc-SLC46A2-1	ATG7	0.697345245
lnc-AP3S1-15	LAMTOR5	0.957210146
lnc-CDK12-2	LAMTOR5	0.987968405
lnc-CSNK1A1-7	LAMTOR5	0.936947285
lnc-EEF1B2-3	LAMTOR5	0.981492726
lnc-FOXN1-1	LAMTOR5	0.949508517
lnc-GNS-3	LAMTOR5	0.979597083
lnc-IL31RA-1	LAMTOR5	0.970270314
lnc-KB-1980E6.3.1-6	LAMTOR5	0.9562946
lnc-LAT2-2	LAMTOR5	0.987465219
lnc-LRRC38-2	LAMTOR5	0.927120439
lnc-NLRP2-2	LAMTOR5	0.873281972
lnc-PHLDB1-1	LAMTOR5	0.974476301
lnc-RAPH1-6	LAMTOR5	0.97272414
lnc-SERHL2-7	LAMTOR5	0.980306255
lnc-SLA2-1	LAMTOR5	0.843234791
lnc-SLC46A2-1	LAMTOR5	0.912439216
lnc-TICAM1-1	LAMTOR5	0.958678546
XLOC_1093926	LAMTOR5	0.96560679
XLOC_2394941	LAMTOR5	0.980585299
XLOC_515910	LAMTOR5	0.90201361
lnc-CDK12-2	POMT1	-0.689608006
lnc-FOXN1-1	POMT1	-0.797298686
lnc-GNS-3	POMT1	-0.700099577
lnc-LAT2-2	POMT1	-0.69125247
lnc-PHLDB1-1	POMT1	-0.690323443
lnc-SERHL2-7	POMT1	-0.695191796
XLOC_2394941	POMT1	-0.687081443
XLOC_2394941	MTHFS	0.710716054
lnc-AP3S1-15	MXD4	0.735698178
lnc-CDK12-2	MXD4	0.702236949
lnc-CSNK1A1-7	MXD4	0.729353239
lnc-EEF1B2-3	MXD4	0.71488804
lnc-IL31RA-1	MXD4	0.706372368
lnc-LAT2-2	MXD4	0.691653871
lnc-LRRC38-2	MXD4	0.78609475
lnc-NLRP2-2	MXD4	0.790879575
lnc-PHLDB1-1	MXD4	0.698212768
lnc-RAPH1-6	MXD4	0.696284663
lnc-SERHL2-7	MXD4	0.698023653
lnc-SLA2-1	MXD4	0.782956763
lnc-SLC46A2-1	MXD4	0.777041946
lnc-TICAM1-1	MXD4	0.705974179
XLOC_1093926	MXD4	0.694580833
XLOC_2394941	MXD4	0.701939077
lnc-SLC46A2-1	HEXIM1	0.688094223
lnc-AP3S1-15	TGOLN2	0.79951331
lnc-CSNK1A1-7	TGOLN2	0.769307551
lnc-LRRC38-2	TGOLN2	0.786468822
lnc-NLRP2-2	TGOLN2	0.861426134
lnc-SLA2-1	TGOLN2	0.895406045
lnc-SLC46A2-1	TGOLN2	0.786786204
lnc-EEF1B2-3	MYL12A	0.695287452
lnc-GNS-3	MYL12A	0.69661375
lnc-KB-1980E6.3.1-6	MYL12A	0.694350932
lnc-LAT2-2	MYL12A	0.714364943
XLOC_2394941	MYL12A	0.76971243
lnc-AP3S1-15	TAF6L	0.729644364
lnc-CSNK1A1-7	TAF6L	0.736490885
lnc-FOXN1-1	TAF6L	0.743081205
lnc-LRRC38-2	TAF6L	0.740976491
lnc-NLRP2-2	TAF6L	0.750659188
lnc-SLA2-1	TAF6L	0.74509834
lnc-SLC46A2-1	TAF6L	0.757379606
lnc-TICAM1-1	TAF6L	0.68676716
lnc-CDK12-2	CENPF	-0.701987448
lnc-EEF1B2-3	CENPF	-0.686574558
lnc-FOXN1-1	CENPF	-0.789418725
lnc-GNS-3	CENPF	-0.700855587
lnc-IL31RA-1	CENPF	-0.698106347
lnc-LAT2-2	CENPF	-0.690232943
lnc-PHLDB1-1	CENPF	-0.695031505
lnc-SERHL2-7	CENPF	-0.711471851
lnc-TICAM1-1	CENPF	-0.695010811
XLOC_1093926	CENPF	-0.689028416
lnc-AP3S1-15	KHDRBS1	0.90316934
lnc-CDK12-2	KHDRBS1	0.792844694
lnc-CSNK1A1-7	KHDRBS1	0.871523278
lnc-EEF1B2-3	KHDRBS1	0.797041075
lnc-FOXN1-1	KHDRBS1	0.728221117
lnc-GNS-3	KHDRBS1	0.803273855
lnc-IL31RA-1	KHDRBS1	0.779432424
lnc-KB-1980E6.3.1-6	KHDRBS1	0.752512482
lnc-LAT2-2	KHDRBS1	0.809249251
lnc-LRRC38-2	KHDRBS1	0.908077773
lnc-NLRP2-2	KHDRBS1	0.94259579
lnc-PHLDB1-1	KHDRBS1	0.79342359
lnc-RAPH1-6	KHDRBS1	0.773654572
lnc-SERHL2-7	KHDRBS1	0.783857951
lnc-SLA2-1	KHDRBS1	0.947868175
lnc-SLC46A2-1	KHDRBS1	0.894384535
lnc-TICAM1-1	KHDRBS1	0.767333305
XLOC_1093926	KHDRBS1	0.775732535
XLOC_2394941	KHDRBS1	0.819419623
XLOC_515910	AVIL	0.784197543
lnc-AP3S1-15	CETN2	0.686565381
lnc-CDK12-2	CETN2	0.692535657
lnc-EEF1B2-3	CETN2	0.712905302
lnc-GNS-3	CETN2	0.715395306
lnc-KB-1980E6.3.1-6	CETN2	0.718992768
lnc-LAT2-2	CETN2	0.736805483
lnc-PHLDB1-1	CETN2	0.695456105
XLOC_2394941	CETN2	0.785021602
lnc-CDK12-2	NRG3	-0.700836434
lnc-EEF1B2-3	NRG3	-0.699820127
lnc-GNS-3	NRG3	-0.705096696
lnc-KB-1980E6.3.1-6	NRG3	-0.692800694
lnc-LAT2-2	NRG3	-0.716547704
lnc-PHLDB1-1	NRG3	-0.69078615
lnc-SERHL2-7	NRG3	-0.688068688
XLOC_2394941	NRG3	-0.734468702
lnc-AP3S1-15	CFL1	0.971321806
lnc-CDK12-2	CFL1	0.898637274
lnc-CSNK1A1-7	CFL1	0.956388499
lnc-EEF1B2-3	CFL1	0.896519878
lnc-FOXN1-1	CFL1	0.828928379
lnc-GNS-3	CFL1	0.906144338
lnc-IL31RA-1	CFL1	0.892910143
lnc-KB-1980E6.3.1-6	CFL1	0.83984615
lnc-LAT2-2	CFL1	0.904311306
lnc-LRRC38-2	CFL1	0.967716785
lnc-NLRP2-2	CFL1	0.975739922
lnc-PHLDB1-1	CFL1	0.899988119
lnc-RAPH1-6	CFL1	0.887950469
lnc-SERHL2-7	CFL1	0.897480869
lnc-SLA2-1	CFL1	0.971502031
lnc-SLC46A2-1	CFL1	0.964477743
lnc-TICAM1-1	CFL1	0.885853541
XLOC_1093926	CFL1	0.890686288
XLOC_2394941	CFL1	0.899049942
XLOC_515910	CFL1	0.772435122
lnc-FOXN1-1	POLQ	-0.713269063
lnc-AP3S1-15	MGEA5	0.829749373
lnc-CDK12-2	MGEA5	0.735791713
lnc-CSNK1A1-7	MGEA5	0.801404441
lnc-EEF1B2-3	MGEA5	0.739541077
lnc-GNS-3	MGEA5	0.729469401
lnc-IL31RA-1	MGEA5	0.716997588
lnc-KB-1980E6.3.1-6	MGEA5	0.794234257
lnc-LAT2-2	MGEA5	0.745426552
lnc-LRRC38-2	MGEA5	0.833582967
lnc-NLRP2-2	MGEA5	0.86245441
lnc-PHLDB1-1	MGEA5	0.725801641
lnc-RAPH1-6	MGEA5	0.726132611
lnc-SERHL2-7	MGEA5	0.720268005
lnc-SLA2-1	MGEA5	0.870698001
lnc-SLC46A2-1	MGEA5	0.818085062
lnc-TICAM1-1	MGEA5	0.704419112
XLOC_1093926	MGEA5	0.716154985
XLOC_2394941	MGEA5	0.746208913
lnc-AP3S1-15	NUDC	0.928531409
lnc-CDK12-2	NUDC	0.821737871
lnc-CSNK1A1-7	NUDC	0.905828438
lnc-EEF1B2-3	NUDC	0.82112155
lnc-FOXN1-1	NUDC	0.794010131
lnc-GNS-3	NUDC	0.837723789
lnc-IL31RA-1	NUDC	0.812971957
lnc-KB-1980E6.3.1-6	NUDC	0.768313196
lnc-LAT2-2	NUDC	0.836632128
lnc-LRRC38-2	NUDC	0.923257354
lnc-NLRP2-2	NUDC	0.952489157
lnc-PHLDB1-1	NUDC	0.826461221
lnc-RAPH1-6	NUDC	0.80734976
lnc-SERHL2-7	NUDC	0.818482752
lnc-SLA2-1	NUDC	0.958042649
lnc-SLC46A2-1	NUDC	0.917759631
lnc-TICAM1-1	NUDC	0.803400014
XLOC_1093926	NUDC	0.812299986
XLOC_2394941	NUDC	0.836888954
XLOC_515910	NUDC	0.693388237
lnc-AP3S1-15	PTGES3	0.900964334
lnc-CDK12-2	PTGES3	0.889060934
lnc-CSNK1A1-7	PTGES3	0.871100828
lnc-EEF1B2-3	PTGES3	0.896178317
lnc-FOXN1-1	PTGES3	0.821097392
lnc-GNS-3	PTGES3	0.880989575
lnc-IL31RA-1	PTGES3	0.868203625
lnc-KB-1980E6.3.1-6	PTGES3	0.928200816
lnc-LAT2-2	PTGES3	0.90007835
lnc-LRRC38-2	PTGES3	0.894499363
lnc-NLRP2-2	PTGES3	0.87116885
lnc-PHLDB1-1	PTGES3	0.87796339
lnc-RAPH1-6	PTGES3	0.875501628
lnc-SERHL2-7	PTGES3	0.870561703
lnc-SLA2-1	PTGES3	0.85224204
lnc-SLC46A2-1	PTGES3	0.867003994
lnc-TICAM1-1	PTGES3	0.853623588
XLOC_1093926	PTGES3	0.864971078
XLOC_2394941	PTGES3	0.905884143
XLOC_515910	PTGES3	0.787671268
lnc-AP3S1-15	PLK4	-0.84440773
lnc-CDK12-2	PLK4	-0.731966778
lnc-CSNK1A1-7	PLK4	-0.837181852
lnc-EEF1B2-3	PLK4	-0.726275194
lnc-GNS-3	PLK4	-0.726398855
lnc-IL31RA-1	PLK4	-0.727582358
lnc-KB-1980E6.3.1-6	PLK4	-0.687608314
lnc-LAT2-2	PLK4	-0.726587888
lnc-LRRC38-2	PLK4	-0.852845823
lnc-NLRP2-2	PLK4	-0.891318771
lnc-PHLDB1-1	PLK4	-0.726534357
lnc-RAPH1-6	PLK4	-0.731178907
lnc-SERHL2-7	PLK4	-0.731500249
lnc-SLA2-1	PLK4	-0.906434266
lnc-SLC46A2-1	PLK4	-0.858938237
lnc-TICAM1-1	PLK4	-0.723973455
XLOC_1093926	PLK4	-0.727129276
XLOC_2394941	PLK4	-0.710808379
lnc-AP3S1-15	STAG2	0.756468242
lnc-CDK12-2	STAG2	0.705998695
lnc-CSNK1A1-7	STAG2	0.731758699
lnc-EEF1B2-3	STAG2	0.723425356
lnc-GNS-3	STAG2	0.708535576
lnc-IL31RA-1	STAG2	0.692281046
lnc-KB-1980E6.3.1-6	STAG2	0.827365102
lnc-LAT2-2	STAG2	0.727763262
lnc-LRRC38-2	STAG2	0.768276519
lnc-NLRP2-2	STAG2	0.773521042
lnc-PHLDB1-1	STAG2	0.706797923
lnc-RAPH1-6	STAG2	0.701791166
lnc-SLA2-1	STAG2	0.767321442
lnc-SLC46A2-1	STAG2	0.739856359
XLOC_1093926	STAG2	0.694334691
XLOC_2394941	STAG2	0.737033854
lnc-AP3S1-15	RFPL1S	0.903695431
lnc-CDK12-2	RFPL1S	0.784280008
lnc-CSNK1A1-7	RFPL1S	0.905403208
lnc-EEF1B2-3	RFPL1S	0.786522858
lnc-FOXN1-1	RFPL1S	0.733898913
lnc-GNS-3	RFPL1S	0.797599018
lnc-IL31RA-1	RFPL1S	0.791206365
lnc-KB-1980E6.3.1-6	RFPL1S	0.733019277
lnc-LAT2-2	RFPL1S	0.790236484
lnc-LRRC38-2	RFPL1S	0.919226607
lnc-NLRP2-2	RFPL1S	0.957808541
lnc-PHLDB1-1	RFPL1S	0.796310381
lnc-RAPH1-6	RFPL1S	0.789810387
lnc-SERHL2-7	RFPL1S	0.787375109
lnc-SLA2-1	RFPL1S	0.969732353
lnc-SLC46A2-1	RFPL1S	0.925470135
lnc-TICAM1-1	RFPL1S	0.790586496
XLOC_1093926	RFPL1S	0.795072317
XLOC_2394941	RFPL1S	0.775428248
lnc-AP3S1-15	ZNF271	0.94816705
lnc-CDK12-2	ZNF271	0.859300527
lnc-CSNK1A1-7	ZNF271	0.909866581
lnc-EEF1B2-3	ZNF271	0.860096226
lnc-FOXN1-1	ZNF271	0.787647422
lnc-GNS-3	ZNF271	0.861395689
lnc-IL31RA-1	ZNF271	0.839187778
lnc-KB-1980E6.3.1-6	ZNF271	0.816532241
lnc-LAT2-2	ZNF271	0.871354405
lnc-LRRC38-2	ZNF271	0.94563694
lnc-NLRP2-2	ZNF271	0.966357523
lnc-PHLDB1-1	ZNF271	0.851314704
lnc-RAPH1-6	ZNF271	0.833994941
lnc-SERHL2-7	ZNF271	0.847982588
lnc-SLA2-1	ZNF271	0.965230005
lnc-SLC46A2-1	ZNF271	0.929042118
lnc-TICAM1-1	ZNF271	0.824429615
XLOC_1093926	ZNF271	0.832215976
XLOC_2394941	ZNF271	0.883139523
XLOC_515910	ZNF271	0.730011699
lnc-AP3S1-15	CYSLTR1	-0.770142092
lnc-CDK12-2	CYSLTR1	-0.802401229
lnc-CSNK1A1-7	CYSLTR1	-0.764909819
lnc-EEF1B2-3	CYSLTR1	-0.788908662
lnc-FOXN1-1	CYSLTR1	-0.878239346
lnc-GNS-3	CYSLTR1	-0.802265651
lnc-IL31RA-1	CYSLTR1	-0.799949516
lnc-KB-1980E6.3.1-6	CYSLTR1	-0.730661537
lnc-LAT2-2	CYSLTR1	-0.791648744
lnc-LRRC38-2	CYSLTR1	-0.746037383
lnc-NLRP2-2	CYSLTR1	-0.696983322
lnc-PHLDB1-1	CYSLTR1	-0.797332685
lnc-RAPH1-6	CYSLTR1	-0.785891522
lnc-SERHL2-7	CYSLTR1	-0.811468892
lnc-SLC46A2-1	CYSLTR1	-0.750633027
lnc-TICAM1-1	CYSLTR1	-0.796965603
XLOC_1093926	CYSLTR1	-0.791485139
XLOC_2394941	CYSLTR1	-0.783578451
XLOC_515910	GJB6	-0.695550261
lnc-CDK12-2	FTCD	-0.702783838
lnc-EEF1B2-3	FTCD	-0.690884123
lnc-GNS-3	FTCD	-0.698904292
lnc-IL31RA-1	FTCD	-0.697871962
lnc-LAT2-2	FTCD	-0.6933743
lnc-PHLDB1-1	FTCD	-0.695508239
lnc-RAPH1-6	FTCD	-0.691874968
lnc-SERHL2-7	FTCD	-0.707746885
lnc-TICAM1-1	FTCD	-0.694340377
XLOC_1093926	FTCD	-0.692570603
lnc-AP3S1-15	PPARGC1A	-0.761950938
lnc-CDK12-2	PPARGC1A	-0.763573847
lnc-CSNK1A1-7	PPARGC1A	-0.76595134
lnc-EEF1B2-3	PPARGC1A	-0.765732971
lnc-FOXN1-1	PPARGC1A	-0.706746579
lnc-GNS-3	PPARGC1A	-0.751241763
lnc-IL31RA-1	PPARGC1A	-0.756489508
lnc-KB-1980E6.3.1-6	PPARGC1A	-0.737627023
lnc-LAT2-2	PPARGC1A	-0.763369179
lnc-LRRC38-2	PPARGC1A	-0.751144204
lnc-NLRP2-2	PPARGC1A	-0.722436022
lnc-PHLDB1-1	PPARGC1A	-0.757027538
lnc-RAPH1-6	PPARGC1A	-0.780092064
lnc-SERHL2-7	PPARGC1A	-0.752517172
lnc-SLA2-1	PPARGC1A	-0.712362366
lnc-SLC46A2-1	PPARGC1A	-0.741069594
lnc-TICAM1-1	PPARGC1A	-0.75168224
XLOC_1093926	PPARGC1A	-0.76483027
XLOC_2394941	PPARGC1A	-0.736748032
XLOC_515910	PPARGC1A	-0.859725091
lnc-AP3S1-15	JTB	0.896888846
lnc-CDK12-2	JTB	0.902733199
lnc-CSNK1A1-7	JTB	0.887374195
lnc-EEF1B2-3	JTB	0.899160784
lnc-FOXN1-1	JTB	0.930395635
lnc-GNS-3	JTB	0.900332972
lnc-IL31RA-1	JTB	0.902478924
lnc-KB-1980E6.3.1-6	JTB	0.833309491
lnc-LAT2-2	JTB	0.894130599
lnc-LRRC38-2	JTB	0.899492447
lnc-NLRP2-2	JTB	0.86506879
lnc-PHLDB1-1	JTB	0.899810302
lnc-RAPH1-6	JTB	0.885014736
lnc-SERHL2-7	JTB	0.907685508
lnc-SLA2-1	JTB	0.835951962
lnc-SLC46A2-1	JTB	0.897265033
lnc-TICAM1-1	JTB	0.899228041
XLOC_1093926	JTB	0.890884708
XLOC_2394941	JTB	0.896200709
XLOC_515910	JTB	0.771477569
lnc-AP3S1-15	DHRS4	0.705317058
lnc-CSNK1A1-7	DHRS4	0.69133153
lnc-FOXN1-1	DHRS4	0.743039843
lnc-GNS-3	DHRS4	0.694378078
lnc-LRRC38-2	DHRS4	0.701119661
lnc-NLRP2-2	DHRS4	0.68894959
lnc-PHLDB1-1	DHRS4	0.686487325
lnc-SERHL2-7	DHRS4	0.687558047
lnc-SLC46A2-1	DHRS4	0.6987625
XLOC_2394941	DHRS4	0.692448178
lnc-AP3S1-15	TRAFD1	0.696622151
[truncated: 19,470 more rows]
