# Supplementary material for: LncRNAs induce oxidative stress and spermatogenesis by regulating endoplasmic reticulum genes and pathways
Source: Aging (Albany NY). 2021 May 6;13(10):13764–87. doi: 10.18632/aging.202971 (PMC8202879; doi:10.18632/aging.202971)
Supplement: Supplementary Table 10 [file aging-13-202971-s010.csv]

Supplementary Table 10. SR_correlation_network.
Var1	Var2	value
ARHGEF19-AS1	KDELR2	0.803833432
FOXP1-AS1	KDELR2	0.830539979
lnc-ADAM21-4	KDELR2	0.779904744
lnc-ADC-1	KDELR2	0.888555983
lnc-BCAP31-1	KDELR2	0.796122577
lnc-C11orf1-1	KDELR2	0.934584071
lnc-C12orf63-3	KDELR2	0.694093764
lnc-C15orf48-1	KDELR2	0.772356071
lnc-C1orf124-1	KDELR2	0.868791245
lnc-C2CD4A-9	KDELR2	0.823975242
lnc-C2orf78-3	KDELR2	0.722135302
lnc-C2orf84-1	KDELR2	0.911952129
lnc-C4orf34-3	KDELR2	0.790725528
lnc-C7orf45-1	KDELR2	0.72589755
lnc-CD2BP2-1	KDELR2	0.81930507
lnc-CD80-2	KDELR2	0.737651788
lnc-CKS1B-2	KDELR2	0.829202684
lnc-CORIN-2	KDELR2	0.833363915
lnc-CPSF4-1	KDELR2	0.822679656
lnc-CST7-1	KDELR2	0.761627398
lnc-DENND4C-1	KDELR2	0.740369661
lnc-EDC3-3	KDELR2	0.915748636
lnc-FBXL3-1	KDELR2	0.880538024
lnc-FLNB-3	KDELR2	0.809870799
lnc-FREM3-2	KDELR2	0.825567662
lnc-GARS-2	KDELR2	0.689952269
lnc-GLDN-2	KDELR2	0.75864503
lnc-GLUD1-2	KDELR2	0.766001637
lnc-GPR37L1-2	KDELR2	0.855686235
lnc-GRAMD2-1	KDELR2	0.824617272
lnc-HAAO-1	KDELR2	0.849645206
lnc-KDM4C-18	KDELR2	0.781801965
lnc-LALBA-1	KDELR2	0.871904854
lnc-LRR1-1	KDELR2	0.814913477
lnc-MAFF-9	KDELR2	0.692404948
lnc-MFSD8-1	KDELR2	0.878859615
lnc-MLH3-2	KDELR2	0.831410673
lnc-MPHOSPH8-4	KDELR2	0.834983213
lnc-MRPS30-8	KDELR2	0.884705658
lnc-NCKAP1-1	KDELR2	0.872288721
lnc-NDUFS6-15	KDELR2	0.71301309
lnc-NEMF-1	KDELR2	0.691399037
lnc-NKX2-5-2	KDELR2	0.840034623
lnc-NKX3-1-2	KDELR2	0.841983015
lnc-PANK3-13	KDELR2	0.926427533
lnc-PMM2-6	KDELR2	0.887511847
lnc-PPFIA3-2	KDELR2	0.836424436
lnc-PRDM13-2	KDELR2	0.908253446
lnc-PTPN2-6	KDELR2	0.82313642
lnc-PTPN6-1	KDELR2	0.701252608
lnc-PUS10-4	KDELR2	0.814161376
lnc-REST-4	KDELR2	0.877443372
lnc-RLIM-8	KDELR2	0.812097915
lnc-RNF213-1	KDELR2	0.828846015
lnc-RPL30-1	KDELR2	0.74485088
lnc-SCNN1G-1	KDELR2	0.833611681
lnc-SEPT10-2	KDELR2	0.843770352
lnc-SNAPC2-4	KDELR2	0.800971332
lnc-SOX15-1	KDELR2	0.819593179
lnc-SPTBN4-3	KDELR2	0.846011001
lnc-SUSD5-1	KDELR2	0.797246026
lnc-TARBP2-5	KDELR2	0.702133731
lnc-TCTEX1D1-1	KDELR2	0.856634391
lnc-TIGD6-1	KDELR2	0.70585233
lnc-TMED5-5	KDELR2	0.694628347
lnc-TMEM240-1	KDELR2	0.858384146
lnc-TSKS-1	KDELR2	0.721206831
lnc-TULP4-1	KDELR2	0.829115802
lnc-VPS36-2	KDELR2	0.822934682
lnc-ZNF101-4	KDELR2	0.826580892
lnc-ZNF238-7	KDELR2	0.758898357
lnc-ZNF460-2	KDELR2	0.826025792
lnc-ZNF532-2	KDELR2	0.724160917
lnc-ZNF791-10	KDELR2	0.80916884
lnc-ZXDB-3	KDELR2	0.883696789
MEG8	KDELR2	-0.774100741
OIP5-AS1	KDELR2	0.927845267
RRM1-AS1	KDELR2	0.828859336
TTTY14	KDELR2	0.771632532
XLOC_1174749	KDELR2	0.821478787
XLOC_1230810	KDELR2	0.69567836
XLOC_1233735	KDELR2	0.845635861
XLOC_1829151	KDELR2	0.831524103
XLOC_2217694	KDELR2	0.866629759
XLOC_2219986	KDELR2	0.81774567
XLOC_236009	KDELR2	0.864061792
XLOC_2393128	KDELR2	0.831614217
XLOC_2394463	KDELR2	0.837537511
XLOC_2834725	KDELR2	-0.739247135
XLOC_514590	KDELR2	0.834504866
XLOC_515394	KDELR2	0.893933212
XLOC_753260	KDELR2	0.824540813
XLOC_846032	KDELR2	0.77649802
ADIRF-AS1	RER1	0.921834694
ATP6V0E2-AS1	RER1	0.864612246
B3GALT5-AS1	RER1	-0.750079685
BOLA3-AS1	RER1	0.758046287
CARS-AS1	RER1	0.925588806
CCDC144NL-AS1	RER1	0.958792154
CHKB-AS1	RER1	-0.865466932
COX10-AS1	RER1	-0.743381153
DCTN1-AS1	RER1	0.750987012
DLGAP4-AS1	RER1	0.781948957
EAF1-AS1	RER1	0.861591241
EIF1B-AS1	RER1	0.727574723
FARP1-AS1	RER1	0.935066327
FARSA-AS1	RER1	0.941227798
FLNB-AS1	RER1	0.955853261
GNAS-AS1	RER1	-0.746072541
GTF3C2-AS1	RER1	0.722633676
H1FX-AS1	RER1	0.865373089
HOXA10-AS	RER1	0.826731563
HOXC-AS3	RER1	-0.702716059
IGBP1-AS2	RER1	0.688682701
KDM4A-AS1	RER1	0.693862848
LAMTOR5-AS1	RER1	0.958761106
LIMD1-AS1	RER1	0.976789419
LINC00094	RER1	0.964407164
LINC00431	RER1	-0.779437348
LINC00526	RER1	0.84733355
LINC00649	RER1	0.77210451
LINC00847	RER1	0.887603294
LINC00890	RER1	0.758403248
LINC00894	RER1	0.793443332
LINC00905	RER1	-0.829366169
LINC00959	RER1	-0.774447869
LINC01102	RER1	-0.851452795
LINC01297	RER1	-0.851272465
LINC01606	RER1	-0.762533193
lnc-A1BG-3	RER1	0.698509807
lnc-ABAT-3	RER1	0.956415071
lnc-ABCC3-1	RER1	0.808636299
lnc-ABCD3-1	RER1	-0.828475574
lnc-ABHD12B-1	RER1	0.754534025
lnc-AC008073.6.1-2	RER1	0.746274006
lnc-AC008686.1-4	RER1	0.740021948
lnc-AC010336.2-1	RER1	0.7448064
lnc-AC011239.1.1-6	RER1	-0.787029799
lnc-AC011443.1-4	RER1	0.780646654
lnc-AC011551.1-1	RER1	0.865977644
lnc-AC040934.1-3	RER1	0.917943264
lnc-AC074212.3.1-1	RER1	0.854739757
lnc-AC084851.1-9	RER1	0.808376203
lnc-AC092295.7.1-2	RER1	0.742102225
lnc-AC115618.1-1	RER1	0.733267462
lnc-AC127496.3-6	RER1	0.718407338
lnc-ACP1-3	RER1	-0.775713874
lnc-ACSBG1-4	RER1	0.83182559
lnc-ACY1-2	RER1	0.876730815
lnc-ADAM22-2	RER1	0.837125466
lnc-ADAMTS16-2	RER1	-0.688700594
lnc-ADAMTS18-3	RER1	0.846992119
lnc-ADCK3-1	RER1	0.960115589
lnc-AGRP-7	RER1	-0.759605908
lnc-AIDA-1	RER1	0.69455896
lnc-AL033381.1-8	RER1	-0.720452388
lnc-AL136219.1-3	RER1	0.760677566
lnc-AL391421.1-2	RER1	0.854538502
lnc-AL901608.1-3	RER1	-0.694321722
lnc-ALDH1A2-3	RER1	0.868723725
lnc-ALG2-6	RER1	-0.795471177
lnc-ALPK1-2	RER1	0.940335871
lnc-ALPK2-4	RER1	0.945224545
lnc-AMDHD2-2	RER1	0.750076856
lnc-AMN-1	RER1	0.952999718
lnc-AMN-3	RER1	0.877847222
lnc-ANAPC11-2	RER1	0.913120491
lnc-ANGPTL6-1	RER1	0.924002772
lnc-ANKRD50-3	RER1	-0.750646051
lnc-AP3S1-1	RER1	0.754214617
lnc-AP3S1-6	RER1	0.962343136
lnc-APC-4	RER1	0.686611176
lnc-APITD1-CORT-1	RER1	0.846082672
lnc-ARF6-1	RER1	0.903250883
lnc-ARHGAP28-7	RER1	0.838422209
lnc-ARHGEF38-1	RER1	0.951368776
lnc-ARHGEF40-1	RER1	0.718985742
lnc-ARID5A-2	RER1	0.788416236
lnc-ARL16-1	RER1	0.945571511
lnc-ARL6IP5-1	RER1	0.720222854
lnc-ARMC2-1	RER1	0.698622994
lnc-ARMC7-1	RER1	0.936683016
lnc-ARVCF-4	RER1	0.972372582
lnc-ASB5-1	RER1	0.745277615
lnc-ASH2L-1	RER1	0.942547318
lnc-ATF7IP2-1	RER1	0.823945263
lnc-ATG10-6	RER1	0.863456061
lnc-ATG12-5	RER1	0.864875121
lnc-ATP1B3-2	RER1	0.808330481
lnc-ATP2C2-1	RER1	0.819522343
lnc-ATP6V1C2-2	RER1	0.71486191
lnc-ATPAF2-2	RER1	0.819890771
lnc-ATPIF1-2	RER1	0.701947422
lnc-B3GAT1-2	RER1	-0.791167883
lnc-B4GALT3-1	RER1	0.969755061
lnc-B4GALT7-1	RER1	0.711413348
lnc-B9D1-1	RER1	0.68935397
lnc-BASP1-1	RER1	0.81553044
lnc-BCL6-9	RER1	0.728471555
lnc-BEAN1-1	RER1	0.789048588
lnc-BLID-7	RER1	0.824708236
lnc-BLK-2	RER1	0.944562744
lnc-BNIP2-2	RER1	-0.896849662
lnc-BPHL-9	RER1	0.825981658
lnc-BRAT1-2	RER1	0.918483421
lnc-BRI3-1	RER1	0.73657748
lnc-BTBD10-8	RER1	0.804601791
lnc-BTBD6-1	RER1	0.936480601
lnc-BTD-1	RER1	0.763078643
lnc-BTG2-3	RER1	0.939730609
lnc-C10orf103-1	RER1	0.849726718
lnc-C10orf28-5	RER1	0.889444386
lnc-C11orf41-1	RER1	0.936784232
lnc-C11orf44-8	RER1	-0.804383469
lnc-C11orf74-7	RER1	-0.854070606
lnc-C12orf23-1	RER1	0.885650895
lnc-C12orf60-2	RER1	-0.709130423
lnc-C14orf177-5	RER1	0.903965581
lnc-C14orf23-2	RER1	-0.796739272
lnc-C15orf32-3	RER1	0.792171569
lnc-C16orf62-1	RER1	0.920132994
lnc-C17orf104-1	RER1	0.782745514
lnc-C17orf63-2	RER1	0.77467086
lnc-C17orf97-5	RER1	0.753510635
lnc-C19orf26-2	RER1	0.867696662
lnc-C19orf6-3	RER1	0.878692933
lnc-C19orf6-5	RER1	0.743987743
lnc-C19orf68-4	RER1	0.85702955
lnc-C1orf122-2	RER1	0.949051775
lnc-C1orf123-1	RER1	0.963361613
lnc-C1orf167-2	RER1	0.972276395
lnc-C1orf177-2	RER1	0.822132734
lnc-C1orf201-3	RER1	0.751071511
lnc-C1orf201-5	RER1	0.932871508
lnc-C1orf43-3	RER1	0.955269749
lnc-C1orf43-4	RER1	0.765328937
lnc-C1orf56-1	RER1	0.697141299
lnc-C1orf85-1	RER1	0.968596233
lnc-C1QBP-1	RER1	0.883635679
lnc-C1QL3-1	RER1	0.70011811
lnc-C1S-1	RER1	0.695649457
lnc-C20orf96-3	RER1	0.933732348
lnc-C2orf18-1	RER1	-0.847483495
lnc-C3orf23-2	RER1	0.968343581
lnc-C5orf25-1	RER1	0.881485045
lnc-C5orf27-4	RER1	0.742221811
lnc-C5orf45-1	RER1	0.795769925
lnc-C5orf63-2	RER1	0.702024237
lnc-C6orf105-5	RER1	0.753917235
lnc-C6orf108-1	RER1	0.714671002
lnc-C6orf164-2	RER1	-0.753937249
lnc-C6orf99-7	RER1	0.930154321
lnc-C8orf48-7	RER1	-0.774995508
lnc-C8orf56-3	RER1	0.762917972
lnc-C9orf3-6	RER1	0.708620782
lnc-C9orf43-1	RER1	0.780562963
lnc-C9orf50-2	RER1	0.814831419
lnc-CASKIN2-1	RER1	0.940634617
lnc-CBR1-1	RER1	0.694796419
lnc-CCDC127-2	RER1	-0.777234619
lnc-CCDC159-1	RER1	0.918782511
lnc-CCDC159-4	RER1	0.982036403
lnc-CCDC23-1	RER1	0.834907359
lnc-CCDC68-1	RER1	0.741841473
lnc-CCDC7-2	RER1	0.928333799
lnc-CCDC85C-2	RER1	0.783112166
lnc-CCM2-2	RER1	0.734395417
lnc-CCT6B-4	RER1	0.814283785
lnc-CD226-5	RER1	-0.797503004
lnc-CD37-1	RER1	0.875195642
lnc-CDH11-2	RER1	-0.760758332
lnc-CDIPT-1	RER1	0.957021673
lnc-CDKL1-1	RER1	0.702641205
lnc-CDYL-10	RER1	-0.884063136
lnc-CEBPG-4	RER1	0.953948177
lnc-CELF3-2	RER1	0.866043371
lnc-CEMP1-10	RER1	0.738826988
lnc-CEMP1-5	RER1	0.907107425
lnc-CENPT-1	RER1	0.728480751
lnc-CHAD-3	RER1	0.788621061
lnc-CHADL-1	RER1	0.942955223
lnc-CHRAC1-7	RER1	0.783202309
lnc-CHRNA5-3	RER1	-0.849512526
lnc-CHST12-1	RER1	-0.739711795
lnc-CHSY1-5	RER1	0.920351133
lnc-CIB1-3	RER1	0.720165493
lnc-CIB3-1	RER1	0.867728837
lnc-CLASP2-1	RER1	0.742902708
lnc-CLDN6-4	RER1	0.70182476
lnc-CLLU1.1-1	RER1	-0.785535622
lnc-CLVS1-1	RER1	-0.749416103
lnc-CMBL-5	RER1	0.932060785
lnc-CNIH3-2	RER1	-0.747101196
lnc-COBL-2	RER1	-0.833263627
lnc-COG8-1	RER1	0.924232841
lnc-COL28A1-1	RER1	0.851066507
lnc-COMMD5-1	RER1	0.961532828
lnc-COTL1-2	RER1	0.733328615
lnc-CPLX1-2	RER1	0.803387756
lnc-CPLX1-3	RER1	0.811840358
lnc-CPNE5-1	RER1	-0.788358366
lnc-CRHR1-6	RER1	0.69128154
lnc-CTNS-1	RER1	0.745251793
lnc-CTRL-2	RER1	0.964421107
lnc-CXCL16-1	RER1	0.852296419
lnc-CYB5R2-5	RER1	0.771009356
lnc-CYFIP1-5	RER1	0.867527692
lnc-CYP2C18-1	RER1	-0.846973517
lnc-DALRD3-1	RER1	0.744180997
lnc-DALRD3-2	RER1	0.829506946
lnc-DAPP1-1	RER1	0.938998224
lnc-DCAF6-1	RER1	0.964808488
lnc-DDHD2-1	RER1	0.726514812
lnc-DDX54-1	RER1	0.78296993
lnc-DEGS2-6	RER1	0.727355599
lnc-DHRS7B-1	RER1	-0.877563252
lnc-DHRS7B-3	RER1	0.977165378
lnc-DHX36-3	RER1	0.84522673
lnc-DKK4-5	RER1	0.815666469
lnc-DNAJA1-1	RER1	0.704956253
lnc-DNAJA4-1	RER1	0.7299156
lnc-DNASE1L1-1	RER1	0.885981013
lnc-DOC2B-3	RER1	-0.71561106
lnc-DONSON-1	RER1	0.968282659
lnc-DPCD-3	RER1	0.721350171
lnc-DPP4-2	RER1	0.862667363
lnc-DSCC1-1	RER1	0.797420113
lnc-DTHD1-5	RER1	-0.836587348
lnc-DUOX2-1	RER1	0.843201183
lnc-DUSP11-3	RER1	0.876417644
lnc-DUSP14-4	RER1	0.78507805
lnc-DUXA-1	RER1	0.882264193
lnc-EAF2-3	RER1	0.706542365
lnc-EDC3-5	RER1	0.73432219
lnc-EEF1B2-1	RER1	0.956212316
lnc-EIF1AD-1	RER1	0.937881833
lnc-EIF2AK4-3	RER1	0.796593353
lnc-EIF2C2-2	RER1	-0.782111909
lnc-ENTPD5-5	RER1	0.786974563
lnc-EPHB6-1	RER1	0.741261352
lnc-ERAL1-3	RER1	0.880892231
lnc-ERAP1-1	RER1	0.810747086
lnc-ERH-1	RER1	0.786787695
lnc-ESPN-3	RER1	0.823262058
lnc-EVX1-15	RER1	0.887610064
lnc-EXOC3-3	RER1	0.879094609
lnc-F8-1	RER1	0.954940232
lnc-FAM117A-1	RER1	0.931482009
lnc-FAM120B-3	RER1	-0.823753321
lnc-FAM127C-1	RER1	0.894411822
lnc-FAM135A-2	RER1	0.704031341
lnc-FAM161B-1	RER1	0.972028911
lnc-FAM162A-2	RER1	0.77961288
lnc-FAM183A-3	RER1	0.725028921
lnc-FAM190B-4	RER1	-0.857117885
lnc-FAM196A-1	RER1	0.886403319
lnc-FAM57A-3	RER1	0.91683038
lnc-FAM59B-3	RER1	0.887082555
lnc-FAM78A-3	RER1	0.957800418
lnc-FAM8A1-2	RER1	0.90129429
lnc-FBN1-3	RER1	0.835847982
lnc-FBXL22-1	RER1	0.968901557
lnc-FBXO34-5	RER1	-0.744195925
lnc-FBXO47-1	RER1	0.867806353
lnc-FEM1A-4	RER1	0.783866535
lnc-FER-1	RER1	0.811572716
lnc-FEZ1-2	RER1	0.841096464
lnc-FGF21-2	RER1	0.695085776
lnc-FKBP8-1	RER1	0.972129997
lnc-FKRP-1	RER1	0.729546138
lnc-FLII-1	RER1	0.93370918
lnc-FN1-4	RER1	0.968922718
lnc-FOXK2-3	RER1	0.96157629
lnc-FOXM1-1	RER1	0.696896982
lnc-FPR2-1	RER1	-0.87062622
lnc-FRAT1-2	RER1	0.962432904
lnc-FRMD1-8	RER1	0.85604194
lnc-FSCN2-3	RER1	0.763075252
lnc-FTSJ3-1	RER1	0.857478179
lnc-GALNT3-1	RER1	0.720272353
lnc-GAMT-2	RER1	0.849354763
lnc-GANC-1	RER1	0.818675431
lnc-GATAD2B-1	RER1	0.785069563
lnc-GCC1-1	RER1	0.820261129
lnc-GCGR-1	RER1	0.830913323
lnc-GDE1-2	RER1	0.820482854
lnc-GDI2-1	RER1	0.708241283
lnc-GDPD4-1	RER1	0.985773631
lnc-GJA10-8	RER1	-0.807487071
lnc-GJA4-2	RER1	0.82247426
lnc-GK-3	RER1	0.704845178
lnc-GMNC-5	RER1	0.723752531
lnc-GMPR2-1	RER1	0.969021581
lnc-GNA11-3	RER1	0.867456758
lnc-GNG13-5	RER1	-0.7939398
lnc-GNRHR2-1	RER1	0.943876835
lnc-GOSR2-2	RER1	0.704623877
lnc-GPBP1-3	RER1	-0.752749859
lnc-GPLD1-1	RER1	0.697891878
lnc-GPR101-3	RER1	-0.750389669
lnc-GPR126-1	RER1	0.760871656
lnc-GPR157-6	RER1	-0.746016392
lnc-GPR68-1	RER1	0.820760554
lnc-GPR98-8	RER1	0.711260183
lnc-GPT2-1	RER1	-0.69489059
lnc-GRID2IP-1	RER1	0.873937361
lnc-GSG1L-1	RER1	0.810812377
lnc-GSTM5-1	RER1	0.919590455
lnc-GTF2E2-2	RER1	0.796711639
lnc-GTF2F2-7	RER1	0.87469768
lnc-GUCY1A3-3	RER1	-0.876655688
lnc-GUSB-4	RER1	0.907357022
lnc-GYG2P1-1	RER1	0.876658102
lnc-H2AFY2-1	RER1	0.719648951
lnc-H3F3B-1	RER1	0.70545048
lnc-HAUS1-1	RER1	0.969242832
lnc-HBG2-1	RER1	0.775916116
lnc-HCRTR1-1	RER1	0.707355072
lnc-HDLBP-1	RER1	0.846819004
lnc-HDLBP-3	RER1	0.695935583
lnc-HEATR4-6	RER1	0.827482001
lnc-HERC6-1	RER1	-0.838992566
lnc-HHIPL1-2	RER1	0.89401136
lnc-HIP1R-1	RER1	0.74190627
lnc-HMBOX1-2	RER1	0.96039848
lnc-HMGA1-2	RER1	0.875227933
lnc-HMGB2-3	RER1	0.779032248
lnc-HOXA13-1	RER1	0.978592101
lnc-HOXB4-1	RER1	-0.893962439
lnc-HPDL-1	RER1	-0.720277881
lnc-HSP90AA1-1	RER1	0.688052225
lnc-HSP90AA1-3	RER1	0.927613077
lnc-HSPB6-1	RER1	0.924417695
lnc-ID2-1	RER1	0.689960684
lnc-IFT46-1	RER1	0.773495583
lnc-IKBIP-1	RER1	0.782900198
lnc-IL10RB-3	RER1	0.725744488
lnc-IL12RB1-2	RER1	0.716094629
lnc-IL23A-2	RER1	0.852933497
lnc-IL37-4	RER1	-0.731834195
lnc-IL6-8	RER1	0.938615856
lnc-IMPDH2-2	RER1	0.929383825
lnc-INPPL1-1	RER1	0.694152607
lnc-IQCF6-2	RER1	0.767521015
lnc-IRF2BP2-4	RER1	-0.869565302
lnc-IRF4-6	RER1	0.834534336
lnc-IRS2-8	RER1	-0.707202065
lnc-ITGB3BP-5	RER1	0.781999253
lnc-JAG1-1	RER1	0.692991569
lnc-JMJD7-PLA2G4B-2	RER1	0.955837792
lnc-JUNB-2	RER1	0.817735827
lnc-KAZALD1-1	RER1	0.882148058
lnc-KCNC1-2	RER1	-0.830073305
lnc-KCNT1-7	RER1	0.734091204
lnc-KCTD18-1	RER1	0.976826325
lnc-KCTD2-2	RER1	0.881486244
lnc-KDM3A-1	RER1	0.790385353
lnc-KDM5B-3	RER1	-0.902992098
lnc-KHDRBS3-6	RER1	-0.729798239
lnc-KIAA0125-2	RER1	-0.699461463
lnc-KIAA0196-5	RER1	0.698399733
lnc-KIAA0564-2	RER1	0.785434798
lnc-KIAA0913-1	RER1	0.927519737
lnc-KIDINS220-11	RER1	-0.88402801
lnc-KIF13B-2	RER1	0.97724744
lnc-KIF26A-1	RER1	-0.878353294
lnc-KLHL25-12	RER1	0.702554801
lnc-KLHL25-6	RER1	0.731067207
lnc-KLHL36-2	RER1	0.962778549
lnc-KMO-1	RER1	-0.855601503
lnc-KRT80-9	RER1	0.82289346
lnc-LAMA5-2	RER1	0.778316026
lnc-LAMA5-3	RER1	0.85426368
lnc-LECT1-1	RER1	0.832726632
lnc-LEKR1-1	RER1	-0.705483399
lnc-LENG9-4	RER1	0.86184026
lnc-LIPG-2	RER1	0.689601318
lnc-LMAN2-1	RER1	0.723568746
lnc-LMOD1-4	RER1	0.932334126
lnc-LOH12CR1-1	RER1	0.778092833
lnc-LPP-7	RER1	-0.875017673
lnc-LRIT2-4	RER1	0.946697634
lnc-LRRC57-1	RER1	0.746954619
lnc-LRRFIP2-1	RER1	0.762205044
lnc-LRRFIP2-3	RER1	0.692653407
lnc-LRSAM1-1	RER1	0.754362618
lnc-LSS-1	RER1	0.707196283
lnc-LUZP1-3	RER1	0.806621163
lnc-LY86-4	RER1	-0.815960891
lnc-MACC1-1	RER1	0.793525462
lnc-MAFF-2	RER1	0.745131917
lnc-MAN2A2-2	RER1	0.8744439
lnc-MAP1LC3B-1	RER1	-0.767850719
lnc-MARCH10-1	RER1	0.71471235
lnc-MARCH4-1	RER1	0.704338861
lnc-MBOAT1-13	RER1	0.907181841
lnc-MBTPS2-1	RER1	-0.719016515
lnc-MCTS1-2	RER1	0.751997343
lnc-MEP1B-2	RER1	0.933262949
lnc-MESDC1-2	RER1	-0.787559014
lnc-MEST-2	RER1	0.695641291
lnc-MFSD4-1	RER1	0.794708585
lnc-MGLL-5	RER1	0.78769991
lnc-MLX-3	RER1	0.904923182
lnc-MNT-1	RER1	0.881353757
lnc-MORC2-2	RER1	0.931049497
lnc-MPPE1-3	RER1	0.871840496
lnc-MRC2-1	RER1	0.696401676
lnc-MRPL40-4	RER1	0.776425389
lnc-MRPL41-1	RER1	0.943346735
lnc-MRPL48-1	RER1	0.960319067
lnc-MRPS16-1	RER1	0.847570668
lnc-MRPS25-5	RER1	0.84989491
lnc-MRPS27-1	RER1	-0.813699246
lnc-MRPS5-14	RER1	-0.834706122
lnc-MRTO4-2	RER1	0.785024303
lnc-MSI2-5	RER1	0.815552909
lnc-MSMP-2	RER1	0.692284676
lnc-MST1-2	RER1	0.711710472
lnc-MTIF3-2	RER1	0.76649671
lnc-MTRR-7	RER1	0.706236966
lnc-MYC-3	RER1	-0.893790685
lnc-MYL6-2	RER1	0.782225122
lnc-MYLPF-3	RER1	0.717603034
lnc-MYO7B-2	RER1	0.763211244
lnc-MYOM1-1	RER1	0.948956106
lnc-NAA50-3	RER1	0.738821126
lnc-NAA60-1	RER1	0.807846645
lnc-NBAS-15	RER1	0.878190556
lnc-NDUFS6-15	RER1	0.741086015
lnc-NECAB1-2	RER1	-0.726000229
lnc-NEURL4-1	RER1	0.85250962
lnc-NFKBIB-5	RER1	0.71193661
lnc-NGFR-1	RER1	0.936674319
lnc-NHSL1-2	RER1	0.709073313
lnc-NID2-5	RER1	0.749849521
lnc-NIN-1	RER1	-0.871947685
lnc-NIPBL-1	RER1	0.883853191
lnc-NMBR-2	RER1	-0.894534452
lnc-NME6-2	RER1	0.977735147
lnc-NMNAT1-3	RER1	0.989903323
lnc-NPAS2-2	RER1	0.727995004
lnc-NPAT-2	RER1	0.772873404
lnc-NPB-3	RER1	0.982738213
lnc-NPY5R-2	RER1	-0.90770844
lnc-NQO2-14	RER1	0.856273822
lnc-NR2F2-7	RER1	-0.852692544
lnc-NRIP2-1	RER1	0.773617564
lnc-NRIP2-2	RER1	0.975944237
lnc-NSMCE1-1	RER1	0.745342546
lnc-NT5DC2-1	RER1	0.760377145
lnc-NTAN1-1	RER1	0.983615572
lnc-NTSR2-6	RER1	0.895291198
lnc-NUB1-4	RER1	0.886668758
lnc-NUDT6-3	RER1	-0.882416838
lnc-NXPH2-3	RER1	-0.863948184
lnc-OAZ3-4	RER1	-0.87656727
lnc-OBSCN-3	RER1	0.972678587
lnc-ODF4-2	RER1	0.718218585
lnc-OLR1-3	RER1	0.983992164
lnc-OR6S1-1	RER1	0.954956793
lnc-ORC3-1	RER1	0.728110235
lnc-ORC3-2	RER1	0.72415771
lnc-OSBPL7-1	RER1	0.937756212
lnc-OSBPL9-3	RER1	0.739874871
lnc-OTP-2	RER1	-0.918213384
lnc-OXNAD1-6	RER1	0.746294487
lnc-P4HA3-1	RER1	0.780696561
lnc-PANK1-6	RER1	0.772459874
lnc-PANK3-16	RER1	-0.896577168
lnc-PARN-10	RER1	0.707114991
lnc-PARN-14	RER1	-0.831790759
lnc-PCCA-2	RER1	0.880213743
lnc-PCDH1-5	RER1	-0.90080447
lnc-PCGF2-3	RER1	0.908281369
lnc-PCK1-2	RER1	0.922087302
lnc-PCNA-1	RER1	0.757954577
lnc-PDAP1-1	RER1	0.807137237
lnc-PDE8A-2	RER1	-0.731899027
lnc-PDGFRL-2	RER1	0.697573812
lnc-PDZD7-1	RER1	0.749101341
lnc-PEA15-1	RER1	0.793374336
lnc-PER2-5	RER1	0.885370168
lnc-PEX14-1	RER1	0.867167248
lnc-PEX7-2	RER1	0.733337165
lnc-PFKFB2-2	RER1	0.813257514
lnc-PFKP-16	RER1	-0.736971301
lnc-PGBD5-1	RER1	0.860633583
lnc-PHB2-4	RER1	0.839414105
lnc-PHYHIP-1	RER1	0.690899055
lnc-PIGG-2	RER1	0.789455918
lnc-PIGY-5	RER1	0.805431111
lnc-PKLR-1	RER1	0.815970959
lnc-PKP4-4	RER1	-0.82978246
lnc-PLCG1-1	RER1	0.728271812
lnc-PLD3-3	RER1	0.800767682
lnc-PMM2-1	RER1	0.690759419
lnc-PNMA1-1	RER1	0.781071653
lnc-PNMA2-1	RER1	0.700276093
lnc-POC5-1	RER1	0.694635712
lnc-POLRMT-5	RER1	0.717490917
lnc-PPIF-1	RER1	0.851910701
lnc-PPM1D-1	RER1	-0.819200576
lnc-PPP1R3B-11	RER1	0.748792432
lnc-PPP2R3C-4	RER1	-0.765270998
lnc-PPP4C-1	RER1	0.707280711
lnc-PPP4C-8	RER1	0.722700272
lnc-PPP4R1-18	RER1	0.843031679
lnc-PRKAB2-1	RER1	0.713387853
lnc-PRL-13	RER1	0.898366036
lnc-PRR11-1	RER1	0.738437002
lnc-PRR15L-2	RER1	0.812138865
lnc-PRR15L-6	RER1	0.821725229
lnc-PSMC3IP-1	RER1	0.752796803
lnc-PSME1-1	RER1	0.742885695
lnc-PSMG4-11	RER1	-0.746732966
lnc-PSMG4-6	RER1	-0.793393289
lnc-PTGDR2-2	RER1	0.948406078
lnc-PTPRCAP-1	RER1	0.975805585
lnc-PTRHD1-1	RER1	0.87119467
lnc-PURG-1	RER1	0.756191363
lnc-PXDC1-12	RER1	0.744694788
lnc-RAB15-1	RER1	0.828010892
lnc-RAB17-2	RER1	0.783585291
lnc-RAB23-2	RER1	0.764397558
lnc-RAB3A-3	RER1	0.715510869
lnc-RADIL-1	RER1	0.973627317
lnc-RAG2-1	RER1	0.73451996
lnc-RARS-2	RER1	-0.867652343
lnc-RBM26-1	RER1	0.775111732
lnc-RCC1-6	RER1	-0.91381474
lnc-RELL2-1	RER1	0.786104949
lnc-REM2-2	RER1	0.861484225
lnc-RG9MTD1-4	RER1	-0.805720503
lnc-RGS20-1	RER1	0.773314355
lnc-RGS20-3	RER1	-0.761004717
lnc-RHBDF1-1	RER1	0.953822625
lnc-RHOA-1	RER1	0.924423053
lnc-RHOC-1	RER1	0.771368464
lnc-RIC8A-1	RER1	0.964665948
lnc-RIOK1-2	RER1	-0.813141899
lnc-RNF113B-2	RER1	0.878935343
lnc-RNF125-2	RER1	0.957078843
lnc-RNF139-2	RER1	0.739489434
lnc-RNF166-1	RER1	0.857187616
lnc-RNF24-1	RER1	0.94215862
lnc-RNF40-1	RER1	0.971513722
lnc-ROS1-2	RER1	-0.778750337
lnc-RP1-286D6.2.1-2	RER1	0.986262974
lnc-RP11-168K9.2.1-2	RER1	-0.885625021
lnc-RP11-210M15.2.1-6	RER1	0.777476695
lnc-RP11-404P21.6.1-9	RER1	0.836095962
lnc-RP11-498D10.4.1-1	RER1	0.731473204
lnc-RP11-537P22.1.1-1	RER1	-0.811936063
lnc-RP11-6F2.7.1-5	RER1	0.815394045
lnc-RP11-706O15.1.1-7	RER1	-0.916881399
lnc-RP11-884K10.5.1-2	RER1	-0.861305204
lnc-RPL14-2	RER1	0.777231153
lnc-RPS27L-1	RER1	0.686708324
lnc-RRP8-1	RER1	0.990889081
lnc-RSBN1L-2	RER1	0.926966603
lnc-RSPH1-3	RER1	-0.744034443
lnc-RTN3-1	RER1	0.932682127
lnc-RUNDC3A-1	RER1	0.927636265
lnc-RWDD3-1	RER1	-0.763333839
lnc-S100A7A-1	RER1	-0.86524397
lnc-S1PR1-2	RER1	-0.696298677
lnc-S1PR2-2	RER1	0.863603952
lnc-SAFB-1	RER1	0.96024059
lnc-SCAND1-5	RER1	0.95928618
lnc-SCGB1D4-1	RER1	0.859109547
lnc-SCGB2B2-7	RER1	-0.719614468
lnc-SCML4-1	RER1	-0.769071224
lnc-SCNN1B-1	RER1	0.936071914
lnc-SCRN1-2	RER1	-0.716794929
lnc-SDCCAG8-1	RER1	0.770306578
lnc-SEC24B-1	RER1	-0.827150239
lnc-SEMA4B-2	RER1	0.96834631
lnc-SERAC1-3	RER1	0.744029741
lnc-SETD1B-3	RER1	0.70313646
lnc-SETD6-1	RER1	0.977535515
lnc-SETD8-1	RER1	0.707190421
lnc-SGCG-11	RER1	0.742814769
lnc-SGTB-2	RER1	0.95409242
lnc-SHANK2-5	RER1	0.92537902
lnc-SHARPIN-2	RER1	0.690042992
lnc-SHARPIN-4	RER1	0.732032023
lnc-SIVA1-1	RER1	0.800133376
lnc-SLC16A3-1	RER1	0.931322113
lnc-SLC1A1-6	RER1	-0.816649885
lnc-SLC22A18-1	RER1	0.960038021
lnc-SLC22A18-2	RER1	0.724657537
lnc-SLC22A23-1	RER1	0.864481604
lnc-SLC23A1-1	RER1	0.799873992
lnc-SLC25A29-1	RER1	0.754072299
lnc-SLC25A31-2	RER1	0.7742731
lnc-SLC25A47-2	RER1	0.696966316
lnc-SLC30A4-2	RER1	0.815151894
lnc-SLC36A1-5	RER1	0.696954355
lnc-SLC39A10-10	RER1	0.86901172
lnc-SLC39A11-1	RER1	-0.686262121
lnc-SLC3A2-1	RER1	0.864892346
lnc-SLC4A10-2	RER1	0.849785359
lnc-SLC5A2-3	RER1	0.782307032
lnc-SLC7A6OS-2	RER1	0.885059564
lnc-SLC7A7-2	RER1	0.732161457
lnc-SLCO2B1-2	RER1	0.972752528
lnc-SLCO2B1-3	RER1	0.859421092
lnc-SMARCC2-3	RER1	0.780665048
lnc-SMG6-3	RER1	0.822406587
lnc-SNN-5	RER1	0.84330127
lnc-SNX33-1	RER1	0.875786983
lnc-SP110-8	RER1	0.720394194
lnc-SP140-3	RER1	0.86068178
lnc-SP3-1	RER1	-0.919551909
lnc-SPATA12-2	RER1	0.727311661
lnc-SPATA21-3	RER1	0.874697753
lnc-SPATA9-1	RER1	0.952414579
lnc-SPATC1-1	RER1	0.748642208
lnc-SPIN1-1	RER1	-0.791324639
lnc-SPINT2-2	RER1	-0.753839729
lnc-SPPL3.1-3	RER1	0.854498338
lnc-SPRED2-11	RER1	0.732881546
lnc-SPRYD3-1	RER1	0.712599381
lnc-SPTBN5-1	RER1	0.710165533
lnc-SRA1-3	RER1	0.742805048
lnc-SRGAP3-2	RER1	0.747281429
lnc-SRPRB-1	RER1	0.91022851
lnc-SRPX2-2	RER1	0.853096323
lnc-SRSF5-2	RER1	0.853488257
lnc-SSBP4-2	RER1	0.849530705
lnc-ST7L-3	RER1	0.775983233
lnc-STON1-1	RER1	-0.861073952
lnc-STUB1-2	RER1	0.890165547
lnc-SUCNR1-4	RER1	-0.841546728
lnc-SVIL-3	RER1	0.957705488
lnc-SYCP1-1	RER1	-0.840789367
lnc-SYNM-2	RER1	0.709499348
lnc-SYT13-2	RER1	0.766694782
lnc-SYT15-3	RER1	0.695869371
lnc-SZT2-2	RER1	0.884969706
lnc-TAF13-2	RER1	0.922629016
lnc-TAGLN-2	RER1	0.827315466
lnc-TAOK3-9	RER1	0.892272926
lnc-TAS2R42-1	RER1	0.824016087
lnc-TBL1XR1-6	RER1	-0.744588494
lnc-TBP-3	RER1	0.688596299
lnc-TBXAS1-4	RER1	0.956465088
lnc-TCIRG1-1	RER1	0.952392348
lnc-TCTA-1	RER1	0.832469396
lnc-TEKT1-2	RER1	0.737710113
lnc-TFAP2C-4	RER1	-0.920609249
lnc-THBS4-6	RER1	0.801058266
lnc-THUMPD3-4	RER1	0.855108929
lnc-THYN1-1	RER1	0.968597224
lnc-TIAL1-5	RER1	-0.844849034
lnc-TIGD6-1	RER1	0.755229998
lnc-TLE3-8	RER1	0.825039768
lnc-TMBIM1-3	RER1	0.956805307
lnc-TMEM116-1	RER1	0.736730442
lnc-TMEM132D-2	RER1	-0.870317747
lnc-TMEM150A-1	RER1	0.785674407
lnc-TMEM150A-3	RER1	0.793667258
lnc-TMEM156-1	RER1	0.695671143
lnc-TMEM161B-4	RER1	0.730693263
lnc-TMEM186-1	RER1	0.967219686
lnc-TMEM220-1	RER1	0.750474781
lnc-TMEM234-4	RER1	0.932120655
lnc-TMEM43-1	RER1	0.959341151
lnc-TMEM50B-2	RER1	0.690644122
lnc-TMEM98-2	RER1	0.852855523
lnc-TMPRSS2-1	RER1	0.777062814
lnc-TMUB2-1	RER1	0.775506024
lnc-TMUB2-2	RER1	0.959191291
lnc-TNFAIP3-5	RER1	-0.813733427
lnc-TNIP2-1	RER1	0.784197157
lnc-TNN-1	RER1	0.859558656
lnc-TNNT1-1	RER1	-0.822749996
lnc-TOP1MT-5	RER1	0.759912517
lnc-TOR1AIP1-2	RER1	0.877876153
lnc-TOR1AIP2-5	RER1	0.947245864
lnc-TOR3A-1	RER1	0.751803597
lnc-TPSG1-1	RER1	0.766963152
lnc-TRAFD1-1	RER1	0.879726382
lnc-TRAPPC12-1	RER1	0.843825182
lnc-TRAPPC2L-1	RER1	0.72042399
lnc-TRAPPC4-1	RER1	0.750551781
lnc-TRIAP1-2	RER1	0.779714867
lnc-TRIM6-TRIM34-1	RER1	0.881525077
lnc-TRIM69-1	RER1	0.905045553
lnc-TRMT2A-1	RER1	0.728339241
lnc-TRRAP-1	RER1	0.957094668
lnc-TSC1-1	RER1	0.840919133
lnc-TSPAN18-2	RER1	0.853874811
lnc-TSSK6-1	RER1	0.796517021
lnc-TTC23-5	RER1	-0.759670948
lnc-TTC35-7	RER1	-0.848660091
lnc-TTYH3-2	RER1	0.977213793
lnc-TUBA1C-1	RER1	0.860059153
lnc-TUBA1C-3	RER1	0.730088555
lnc-TUBB2A-1	RER1	0.906706968
lnc-TUFM-1	RER1	0.73440673
lnc-TUSC5-5	RER1	0.745917244
lnc-TYMS-1	RER1	0.967960048
lnc-TYW1-1	RER1	0.860777143
lnc-UBAP1-5	RER1	0.953018905
lnc-UBC-1	RER1	-0.869359104
lnc-UBE2Z-1	RER1	0.959957065
lnc-UBE3A-6	RER1	0.94368903
lnc-UBFD1-1	RER1	0.7617471
lnc-UCK1-3	RER1	0.977920503
lnc-ULBP3-5	RER1	-0.801730545
lnc-UMODL1-5	RER1	0.899142107
lnc-URB2-1	RER1	0.690720556
lnc-USP35-3	RER1	0.697904538
lnc-USP37-1	RER1	0.805088711
lnc-USP40-2	RER1	0.806118877
lnc-USP7-1	RER1	0.714046072
lnc-UTP11L-3	RER1	-0.744920886
lnc-VAC14-1	RER1	-0.718073602
lnc-VAT1-1	RER1	0.961611162
lnc-VIPR1-1	RER1	0.91990756
lnc-VN1R2-8	RER1	0.732802627
lnc-VN1R2-9	RER1	0.960402
lnc-VPS33B-6	RER1	0.813782819
lnc-VSTM2B-9	RER1	0.746372876
lnc-WDR73-7	RER1	0.868522177
lnc-WDR73-9	RER1	0.793284804
lnc-WDR77-2	RER1	0.709941219
lnc-WDR83OS-1	RER1	0.769960482
lnc-WIBG-1	RER1	0.735141802
lnc-WNT8A-2	RER1	0.948399199
lnc-XPOT-4	RER1	-0.868023782
lnc-XRCC6-1	RER1	0.88135513
lnc-YIF1A-1	RER1	0.799332632
lnc-YIF1B-1	RER1	0.907763159
lnc-YY1-1	RER1	0.79581912
lnc-ZBED4-1	RER1	0.721506224
lnc-ZBTB37-2	RER1	0.957359133
lnc-ZC3H12B-12	RER1	0.733170046
lnc-ZCCHC17-7	RER1	0.721899458
lnc-ZCCHC24-7	RER1	0.852238786
lnc-ZCCHC24-8	RER1	-0.7460716
lnc-ZFAND1-1	RER1	0.941318376
lnc-ZFAT-6	RER1	-0.801860534
lnc-ZFC3H1-5	RER1	-0.893108227
lnc-ZFP62-1	RER1	0.770197707
lnc-ZFYVE9-1	RER1	0.743984298
lnc-ZNF131-10	RER1	0.818209266
lnc-ZNF146-1	RER1	0.735765617
lnc-ZNF181-2	RER1	0.864867796
lnc-ZNF213-2	RER1	0.846788942
lnc-ZNF394-2	RER1	0.875421337
lnc-ZNF514-2	RER1	0.73039962
lnc-ZNF532-2	RER1	0.707116391
lnc-ZNF582-3	RER1	0.69927893
lnc-ZNF613-7	RER1	0.703901454
lnc-ZNF724P-2	RER1	-0.918783616
lnc-ZNF788-1	RER1	0.924860627
lnc-ZNF791-3	RER1	0.84335265
lnc-ZNF792-5	RER1	0.714757981
lnc-ZNF804B-2	RER1	-0.794350269
lnc-ZNF814-1	RER1	0.709779314
lnc-ZNF83-6	RER1	0.77707122
lnc-ZNF836-2	RER1	0.910493469
lnc-ZSCAN2-5	RER1	0.950821145
lnc-ZXDA-1	RER1	0.91806362
MCM3AP-AS1	RER1	0.944666807
MIR100HG	RER1	-0.796880271
MIR4307HG	RER1	-0.819254463
MME-AS1	RER1	0.822902618
MORC2-AS1	RER1	0.984987058
MRVI1-AS1	RER1	0.831333644
NAPA-AS1	RER1	0.965316681
NCBP2-AS1	RER1	0.702343454
NKILA	RER1	0.932876811
PCBP1-AS1	RER1	0.797775599
PITPNA-AS1	RER1	0.716966128
PPP3CB-AS1	RER1	0.853341206
PRKAR2A-AS1	RER1	0.955212936
PRMT5-AS1	RER1	0.853179625
PTOV1-AS2	RER1	0.979540266
RUSC1-AS1	RER1	0.985735602
SBF2-AS1	RER1	0.789771133
SEMA3F-AS1	RER1	0.867988584
SOX2-OT	RER1	0.955436866
TCEB3-AS1	RER1	0.806102814
TCL6	RER1	-0.722715722
TESC-AS1	RER1	0.892483588
TH2LCRR	RER1	0.733239418
TSC22D1-AS1	RER1	0.868551615
TTC3-AS1	RER1	0.773086139
UGDH-AS1	RER1	0.925141484
XLOC_000090	RER1	0.855887118
XLOC_000127	RER1	-0.868874182
XLOC_001976	RER1	0.948092032
XLOC_003475	RER1	-0.864049927
XLOC_004093	RER1	0.925451904
XLOC_004281	RER1	0.805975221
XLOC_004358	RER1	0.706037568
XLOC_005400	RER1	0.92598507
XLOC_005944	RER1	0.727555915
XLOC_006773	RER1	0.856546378
XLOC_1013783	RER1	0.878157007
XLOC_1015575	RER1	0.970765705
XLOC_1016089	RER1	0.843410304
XLOC_1093786	RER1	-0.729033465
XLOC_1174083	RER1	0.73853198
XLOC_1174150	RER1	0.89211773
XLOC_1175315	RER1	0.941081167
XLOC_1175511	RER1	0.757276215
XLOC_1176618	RER1	0.694289109
XLOC_1176816	RER1	0.970000787
XLOC_1176877	RER1	0.690733277
XLOC_1229860	RER1	-0.919749843
XLOC_1230085	RER1	0.73189756
XLOC_1230790	RER1	-0.876369986
XLOC_1231041	RER1	-0.703456828
XLOC_1231971	RER1	0.785641046
XLOC_1233095	RER1	0.694129017
XLOC_1236338	RER1	0.87402829
XLOC_1236417	RER1	-0.816095586
XLOC_1483319	RER1	-0.847730567
XLOC_1547464	RER1	0.785141521
XLOC_1584675	RER1	0.811911581
XLOC_1585090	RER1	-0.865301371
XLOC_1585364	RER1	0.963171678
XLOC_1621025	RER1	-0.920063367
XLOC_1621861	RER1	0.76352597
XLOC_1622314	RER1	0.818374139
XLOC_1623377	RER1	0.748244356
XLOC_1623520	RER1	0.858281654
XLOC_1623935	RER1	0.902860046
XLOC_1828250	RER1	0.968445319
XLOC_2029264	RER1	0.875911748
XLOC_2030250	RER1	0.77738559
XLOC_2031229	RER1	-0.835305187
XLOC_2031508	RER1	0.774312663
XLOC_2032021	RER1	0.707148631
XLOC_2217124	RER1	-0.8496094
XLOC_2217240	RER1	0.730400866
XLOC_2220896	RER1	0.739713964
XLOC_2393336	RER1	0.699891539
XLOC_2394807	RER1	0.877492886
XLOC_2396781	RER1	0.688916487
XLOC_2557495	RER1	0.781354062
XLOC_2558149	RER1	0.767073811
XLOC_2558202	RER1	-0.78286749
XLOC_2560875	RER1	0.805999754
XLOC_2711915	RER1	-0.87631564
XLOC_2712490	RER1	0.730880506
XLOC_2714423	RER1	0.699189826
XLOC_2714659	RER1	0.887445193
XLOC_2835378	RER1	-0.777521163
XLOC_2837916	RER1	-0.905653461
XLOC_2840559	RER1	0.880367866
XLOC_375823	RER1	0.769452566
XLOC_376348	RER1	0.702509874
XLOC_378168	RER1	0.807026245
XLOC_378454	RER1	0.928130685
XLOC_379277	RER1	-0.74195317
XLOC_514513	RER1	0.73981627
XLOC_515042	RER1	0.78678936
XLOC_515758	RER1	0.858162347
XLOC_516577	RER1	0.978191658
XLOC_651258	RER1	0.760219459
XLOC_753809	RER1	0.763493092
XLOC_754515	RER1	0.820980423
XLOC_754873	RER1	0.697011017
XLOC_845107	RER1	-0.739809749
XLOC_845791	RER1	-0.847439335
XLOC_845984	RER1	0.72998954
XLOC_846292	RER1	0.955162065
XLOC_846295	RER1	0.974354303
XLOC_847013	RER1	0.909329883
XLOC_847052	RER1	0.69831098
XLOC_847150	RER1	0.775073319
XLOC_931187	RER1	0.687076643
XLOC_932037	RER1	0.955405815
XLOC_932070	RER1	0.721397551
XLOC_932582	RER1	0.694812063
XLOC_934016	RER1	0.831009349
ZBTB20-AS1	RER1	0.756966261
ZNF337-AS1	RER1	0.762532328
ZNF571-AS1	RER1	0.77708509
ALKBH3-AS1	CHMP4B	0.710021417
ARSD-AS1	CHMP4B	0.994097966
B3GALT5-AS1	CHMP4B	-0.800556771
BIRC6-AS1	CHMP4B	0.910081022
BOLA3-AS1	CHMP4B	0.87575414
BZRAP1-AS1	CHMP4B	0.72988632
CASC15	CHMP4B	-0.913007508
CASK-AS1	CHMP4B	0.94462889
CFLAR-AS1	CHMP4B	0.974618883
CNOT10-AS1	CHMP4B	0.981297029
DANT1	CHMP4B	-0.818653873
DCTN1-AS1	CHMP4B	0.79028641
DNAJC9-AS1	CHMP4B	0.724996066
DSG2-AS1	CHMP4B	0.720534996
EAF1-AS1	CHMP4B	0.859914095
EIF1B-AS1	CHMP4B	0.734901602
EVX1-AS	CHMP4B	0.89423465
FAM13A-AS1	CHMP4B	0.930425417
FAM95B1	CHMP4B	-0.770794296
FLNB-AS1	CHMP4B	0.720492191
GCC2-AS1	CHMP4B	0.701389243
GLYCTK-AS1	CHMP4B	0.728874234
GRTP1-AS1	CHMP4B	0.926858772
HAGLROS	CHMP4B	0.771018516
HOXC-AS3	CHMP4B	-0.793927203
IDH1-AS1	CHMP4B	0.893954182
IDI2-AS1	CHMP4B	0.9430624
IGBP1-AS2	CHMP4B	0.848281218
ITGA9-AS1	CHMP4B	-0.911880544
KDM4A-AS1	CHMP4B	0.76497855
LINC-PINT	CHMP4B	-0.763236382
LINC00115	CHMP4B	-0.804008272
LINC00237	CHMP4B	-0.784929682
LINC00431	CHMP4B	-0.765801115
LINC00620	CHMP4B	-0.792251554
LINC00649	CHMP4B	0.723435866
LINC00890	CHMP4B	0.791680186
LINC00943	CHMP4B	-0.69984356
LINC00959	CHMP4B	-0.737208969
LINC01039	CHMP4B	-0.751285314
LINC01091	CHMP4B	-0.873327446
LINC01224	CHMP4B	-0.816652994
LINC01297	CHMP4B	-0.758914486
LINC01359	CHMP4B	-0.721018106
LIPE-AS1	CHMP4B	0.775519794
lnc-AARS-1	CHMP4B	0.989927723
lnc-ABCA5-7	CHMP4B	0.771714069
lnc-ABCC3-1	CHMP4B	0.746389332
lnc-ABHD12B-1	CHMP4B	0.823273816
lnc-ABHD12B-4	CHMP4B	0.729392703
lnc-ABHD4-1	CHMP4B	0.710343653
lnc-AC002553.1-1	CHMP4B	0.909836296
lnc-AC006050.2.1-6	CHMP4B	0.911817809
lnc-AC006455.1-12	CHMP4B	-0.700097555
lnc-AC007390.5.1-1	CHMP4B	0.816690046
lnc-AC007390.5.1-4	CHMP4B	0.988984488
lnc-AC008073.6.1-2	CHMP4B	0.823895246
lnc-AC010336.2-1	CHMP4B	0.79856228
lnc-AC010872.2.1-2	CHMP4B	-0.810292262
lnc-AC011443.1-4	CHMP4B	0.746666091
lnc-AC018816.3.1-11	CHMP4B	0.971339996
lnc-AC018816.3.1-9	CHMP4B	0.78580782
lnc-AC020907.3-2	CHMP4B	0.716900251
lnc-AC027323.1-2	CHMP4B	0.724475258
lnc-AC079341.1-10	CHMP4B	0.870315725
lnc-AC091132.1-3	CHMP4B	0.949468388
lnc-AC092295.7.1-2	CHMP4B	0.810138794
lnc-AC114947.1.1-1	CHMP4B	0.793830699
lnc-AC115618.1-1	CHMP4B	0.837447394
lnc-AC127496.3-7	CHMP4B	0.840475789
lnc-ACP1-3	CHMP4B	-0.763410398
lnc-ACSBG1-4	CHMP4B	0.861097976
lnc-ADAM22-2	CHMP4B	0.735108156
lnc-ADAMTS18-1	CHMP4B	0.990813617
lnc-ADAMTS18-3	CHMP4B	0.783787842
lnc-AE000662.92.1-10	CHMP4B	-0.759288278
lnc-AF127577.1-3	CHMP4B	0.986296869
lnc-AF131216.6.1-2	CHMP4B	0.890042197
lnc-AFM-3	CHMP4B	0.827035124
lnc-AGGF1-1	CHMP4B	0.732434177
lnc-AGMAT-4	CHMP4B	0.892216163
lnc-AGPS-3	CHMP4B	0.789010051
lnc-AHSA2-5	CHMP4B	0.744443776
lnc-AIDA-1	CHMP4B	0.831317991
lnc-AIDA-2	CHMP4B	0.851805764
lnc-AL033381.1-4	CHMP4B	-0.688526497
lnc-AL901608.1-17	CHMP4B	-0.82776059
lnc-AL901608.1-3	CHMP4B	-0.828719331
lnc-ALG3-3	CHMP4B	0.925997135
lnc-ALPK1-2	CHMP4B	0.732080731
lnc-ALPK2-6	CHMP4B	0.986345148
lnc-ALX4-5	CHMP4B	0.892917776
lnc-ALX4-7	CHMP4B	0.83823666
lnc-AMDHD1-2	CHMP4B	0.963597793
lnc-AMDHD1-3	CHMP4B	0.912446115
lnc-AMDHD1-4	CHMP4B	0.926686882
lnc-AMDHD2-2	CHMP4B	0.761184899
lnc-AMELY-10	CHMP4B	0.731216774
lnc-AMFR-2	CHMP4B	0.72444428
lnc-ANGPT2-2	CHMP4B	0.984381934
lnc-ANGPTL2-1	CHMP4B	0.982054657
lnc-ANKMY2-1	CHMP4B	0.855682046
lnc-ANKRD20A2-14	CHMP4B	0.785480268
lnc-ANKRD27-6	CHMP4B	0.948868065
lnc-ANKRD30A-5	CHMP4B	-0.700696918
lnc-ANKS6-1	CHMP4B	0.841733433
lnc-AP002414.1.1-1	CHMP4B	0.894182519
lnc-AP005482.1.1-2	CHMP4B	0.932220199
lnc-AP1S2-1	CHMP4B	0.908773026
lnc-AP3S1-1	CHMP4B	0.850465241
lnc-AP3S1-15	CHMP4B	0.951988667
lnc-AP3S1-4	CHMP4B	0.931758537
lnc-AP3S1-9	CHMP4B	0.725584096
lnc-AP4E1-1	CHMP4B	0.925863587
lnc-APC-4	CHMP4B	0.921185197
lnc-APITD1-CORT-1	CHMP4B	0.839896428
lnc-ARF1-1	CHMP4B	0.708433943
lnc-ARHGAP17-9	CHMP4B	0.716816877
lnc-ARHGAP28-7	CHMP4B	0.840247959
lnc-ARHGAP32-4	CHMP4B	0.919595871
lnc-ARHGEF26-3	CHMP4B	0.849416729
lnc-ARHGEF40-1	CHMP4B	0.693291995
lnc-ARID5A-2	CHMP4B	0.810725744
lnc-ARL1-3	CHMP4B	0.944853756
lnc-ARL13A-1	CHMP4B	0.861263265
lnc-ARL4D-1	CHMP4B	0.872299179
lnc-ARMC2-1	CHMP4B	0.938917083
lnc-ARPC4-3	CHMP4B	0.72346894
lnc-ARRDC1-1	CHMP4B	0.902763292
lnc-ASB5-1	CHMP4B	0.773551088
lnc-ASCC2-1	CHMP4B	0.951481616
lnc-ASPRV1-2	CHMP4B	0.886830156
lnc-ATG10-6	CHMP4B	0.697178346
lnc-ATG12-5	CHMP4B	0.686677595
lnc-ATG13-1	CHMP4B	0.725232136
lnc-ATG5-3	CHMP4B	0.713179903
lnc-ATL1-2	CHMP4B	0.797500986
lnc-ATM-1	CHMP4B	0.859528386
lnc-ATM-2	CHMP4B	0.933363618
lnc-ATP11B-6	CHMP4B	0.965188786
lnc-ATP5F1-2	CHMP4B	0.726779247
lnc-ATP6V1C2-2	CHMP4B	0.907841561
lnc-ATP6V1C2-4	CHMP4B	0.992057031
lnc-ATP6V1G3-4	CHMP4B	-0.922795604
lnc-B4GALT7-1	CHMP4B	0.797413949
lnc-B9D1-1	CHMP4B	0.915366624
lnc-BAG3-1	CHMP4B	0.74272415
lnc-BARHL2-4	CHMP4B	-0.687646465
lnc-BASP1-1	CHMP4B	0.7878831
lnc-BASP1-6	CHMP4B	0.808460205
lnc-BCL2L13-3	CHMP4B	0.927522373
lnc-BCL6-9	CHMP4B	0.797965527
lnc-BDH1-5	CHMP4B	-0.719237435
lnc-BEAN1-1	CHMP4B	0.760129827
lnc-BHMT2-4	CHMP4B	-0.765086794
lnc-BIRC8-3	CHMP4B	0.771889026
lnc-BLCAP-1	CHMP4B	-0.81889673
lnc-BLNK-4	CHMP4B	0.909420864
lnc-BMS1-12	CHMP4B	-0.693660284
lnc-BRAT1-2	CHMP4B	0.690380002
lnc-BRCA1-3	CHMP4B	0.7303205
lnc-BRD7-3	CHMP4B	0.880669793
lnc-BRI3-1	CHMP4B	0.818970539
lnc-BRMS1L-7	CHMP4B	0.993246194
lnc-BTD-1	CHMP4B	0.858575595
lnc-C11orf44-8	CHMP4B	-0.727752834
lnc-C11orf49-3	CHMP4B	0.990535482
lnc-C12orf40-3	CHMP4B	0.831201979
lnc-C12orf60-2	CHMP4B	-0.749569847
lnc-C12orf66-1	CHMP4B	0.76408066
lnc-C12orf66-2	CHMP4B	0.72662719
lnc-C14orf102-1	CHMP4B	0.981381589
lnc-C14orf23-2	CHMP4B	-0.724021855
lnc-C14orf28-2	CHMP4B	0.970605752
lnc-C16orf58-5	CHMP4B	0.885110744
lnc-C16orf61-1	CHMP4B	0.866130253
lnc-C17orf101-3	CHMP4B	-0.732869084
lnc-C17orf104-1	CHMP4B	0.697772481
lnc-C17orf48-1	CHMP4B	0.919888622
lnc-C17orf80-6	CHMP4B	0.71381393
lnc-C18orf42-3	CHMP4B	0.983927913
lnc-C19orf10-1	CHMP4B	0.718411318
lnc-C19orf6-3	CHMP4B	0.69017959
lnc-C19orf6-5	CHMP4B	0.833054488
lnc-C19orf80-1	CHMP4B	-0.755804845
lnc-C1orf106-1	CHMP4B	-0.977225195
lnc-C1orf112-3	CHMP4B	0.954023807
lnc-C1orf122-1	CHMP4B	0.757178536
lnc-C1orf186-3	CHMP4B	-0.713208367
lnc-C1orf201-3	CHMP4B	0.84483209
lnc-C1orf43-4	CHMP4B	0.798610895
lnc-C1orf56-1	CHMP4B	0.866464408
lnc-C1QL3-1	CHMP4B	0.883973358
lnc-C1S-1	CHMP4B	0.80138121
lnc-C20orf187-1	CHMP4B	-0.982914184
lnc-C22orf26-1	CHMP4B	0.73055708
lnc-C2orf89-2	CHMP4B	0.808900573
lnc-C3orf17-2	CHMP4B	0.983060615
lnc-C3orf24-1	CHMP4B	0.84602784
lnc-C4orf21-1	CHMP4B	0.93947985
lnc-C4orf34-3	CHMP4B	0.724277936
lnc-C4orf37-2	CHMP4B	0.724370907
lnc-C5orf25-1	CHMP4B	0.702396857
lnc-C5orf27-4	CHMP4B	0.76096177
lnc-C5orf32-3	CHMP4B	0.96377177
lnc-C5orf35-1	CHMP4B	0.72460944
lnc-C5orf35-3	CHMP4B	0.89993506
lnc-C5orf39-1	CHMP4B	0.80039671
lnc-C5orf39-3	CHMP4B	0.888114746
lnc-C5orf45-1	CHMP4B	0.886657456
lnc-C5orf49-1	CHMP4B	0.78301193
lnc-C6orf105-5	CHMP4B	0.767323185
lnc-C6orf108-1	CHMP4B	0.761787914
lnc-C6orf112-8	CHMP4B	0.850480435
lnc-C6orf146-4	CHMP4B	0.803392355
lnc-C6orf195-14	CHMP4B	0.72474081
lnc-C6orf201-18	CHMP4B	-0.699405571
lnc-C7orf45-1	CHMP4B	0.747862507
lnc-C7orf71-4	CHMP4B	0.879948174
lnc-C8orf42-4	CHMP4B	0.937111634
lnc-C8orf56-3	CHMP4B	0.823689322
lnc-C9orf103-7	CHMP4B	0.920055898
lnc-C9orf152-5	CHMP4B	0.956373258
lnc-C9orf3-6	CHMP4B	0.893362442
lnc-C9orf43-1	CHMP4B	0.8117092
lnc-C9orf57-3	CHMP4B	0.905212148
lnc-CALHM1-1	CHMP4B	-0.694828437
lnc-CAMKMT-1	CHMP4B	-0.811456517
lnc-CAP1-1	CHMP4B	-0.718346429
lnc-CAPN13-1	CHMP4B	0.78005536
lnc-CAPN2-2	CHMP4B	0.766696346
lnc-CBR1-1	CHMP4B	0.930669037
lnc-CBY3-3	CHMP4B	0.879145683
lnc-CCDC125-22	CHMP4B	0.914500226
lnc-CCDC148-1	CHMP4B	0.932725616
lnc-CCDC152-2	CHMP4B	0.995758137
lnc-CCDC51-1	CHMP4B	0.83544156
lnc-CCDC68-1	CHMP4B	0.860556031
lnc-CCDC7-2	CHMP4B	0.726397693
lnc-CCDC70-2	CHMP4B	0.693292872
lnc-CCDC83-1	CHMP4B	0.941607513
lnc-CCDC85C-2	CHMP4B	0.759191077
lnc-CCL27-1	CHMP4B	0.95755361
lnc-CCM2-2	CHMP4B	0.704220831
lnc-CCNB1IP1-2	CHMP4B	0.728075289
lnc-CCNI-3	CHMP4B	0.723586103
lnc-CCRN4L-14	CHMP4B	0.8652262
lnc-CCT6B-4	CHMP4B	0.799322466
lnc-CD151-2	CHMP4B	0.973994241
lnc-CD53-2	CHMP4B	0.873312041
lnc-CDCP2-1	CHMP4B	0.710880504
lnc-CDH11-2	CHMP4B	-0.696196973
lnc-CDH18-7	CHMP4B	-0.799412603
lnc-CDK1-3	CHMP4B	0.783433102
lnc-CDK12-1	CHMP4B	-0.689004165
lnc-CDK12-2	CHMP4B	0.99237589
lnc-CDK20-12	CHMP4B	0.952490436
lnc-CDK20-4	CHMP4B	-0.737124986
lnc-CDKL1-1	CHMP4B	0.903353082
lnc-CDR2-1	CHMP4B	0.729699063
lnc-CELF3-2	CHMP4B	0.770446301
lnc-CEMP1-10	CHMP4B	0.905080404
lnc-CGNL1-3	CHMP4B	-0.717211222
lnc-CHAC1-4	CHMP4B	0.869538524
lnc-CHADL-3	CHMP4B	0.993436518
lnc-CHMP4C-1	CHMP4B	0.807966315
lnc-CHMP4C-2	CHMP4B	0.730437914
lnc-CHRNA3-5	CHMP4B	0.893833039
lnc-CHRNA4-4	CHMP4B	-0.746297428
lnc-CHRNA9-2	CHMP4B	0.919398658
lnc-CHST7-2	CHMP4B	0.844091637
lnc-CHSY1-6	CHMP4B	0.982972267
lnc-CIB3-1	CHMP4B	0.719422336
lnc-CLASP2-1	CHMP4B	0.706024481
lnc-CLASP2-5	CHMP4B	-0.75578342
lnc-CLDN15-2	CHMP4B	0.727584588
lnc-CLRN2-1	CHMP4B	0.870579751
lnc-CMBL-5	CHMP4B	0.690315522
lnc-CNDP1-1	CHMP4B	0.974671853
lnc-CNIH3-2	CHMP4B	-0.928239992
lnc-CNOT7-1	CHMP4B	-0.703798588
lnc-COG3-2	CHMP4B	0.801215614
lnc-COIL-2	CHMP4B	0.925504084
lnc-COMMD1-1	CHMP4B	0.889055955
lnc-COQ9-1	CHMP4B	0.852957155
lnc-COTL1-2	CHMP4B	0.875001305
lnc-CPLX1-2	CHMP4B	0.863094282
lnc-CPLX1-3	CHMP4B	0.793014931
lnc-CPM-1	CHMP4B	0.9609209
lnc-CPM-2	CHMP4B	0.874514029
lnc-CPM-3	CHMP4B	0.943021751
lnc-CPT2-3	CHMP4B	0.924664731
lnc-CREG1-2	CHMP4B	0.857829358
lnc-CREM-6	CHMP4B	0.921877578
lnc-CRHR1-5	CHMP4B	0.95553023
lnc-CRHR1-6	CHMP4B	0.908284431
lnc-CRIPT-1	CHMP4B	-0.740178688
lnc-CROCC-2	CHMP4B	0.7781887
lnc-CS-1	CHMP4B	0.721860439
lnc-CSMD1-18	CHMP4B	0.854988709
lnc-CSNK1A1-7	CHMP4B	0.949296386
lnc-CTC-203F4.1.1-3	CHMP4B	-0.800840924
lnc-CTD-2368P22.1.1-2	CHMP4B	0.720755884
lnc-CTNS-1	CHMP4B	0.889782156
lnc-CTRB1-2	CHMP4B	0.799379141
lnc-CTSZ-7	CHMP4B	0.95314957
lnc-CYB5D2-2	CHMP4B	0.975655197
lnc-CYB5R2-3	CHMP4B	-0.959164688
lnc-CYB5R2-5	CHMP4B	0.747274501
lnc-CYFIP1-3	CHMP4B	0.964199122
lnc-CYS1-5	CHMP4B	0.976967168
lnc-CYTH4-4	CHMP4B	0.731090489
lnc-DALRD3-1	CHMP4B	0.90960264
lnc-DBNDD1-1	CHMP4B	0.936598704
lnc-DDX19B-2	CHMP4B	0.911202622
lnc-DDX27-3	CHMP4B	0.88645959
lnc-DENND2D-1	CHMP4B	0.726178298
lnc-DENND4C-1	CHMP4B	0.727327172
lnc-DHX57-1	CHMP4B	0.731886592
lnc-DISC1-1	CHMP4B	-0.688477473
lnc-DKK3-1	CHMP4B	0.716798962
lnc-DKK4-5	CHMP4B	0.791137795
lnc-DLEU7-5	CHMP4B	0.961504374
lnc-DNAJA1-1	CHMP4B	0.924970909
lnc-DNAJA1-2	CHMP4B	-0.714318693
lnc-DNAJA4-1	CHMP4B	0.83363643
lnc-DNAJC5B-1	CHMP4B	0.790626212
lnc-DNASE1L2-1	CHMP4B	0.901318673
lnc-DONSON-1	CHMP4B	0.728018209
lnc-DPCD-3	CHMP4B	0.810656896
lnc-DPP4-2	CHMP4B	0.708984383
lnc-DR1-1	CHMP4B	0.819321292
lnc-DSCC1-1	CHMP4B	0.773600538
lnc-DUSP11-4	CHMP4B	0.927746358
lnc-DUSP14-4	CHMP4B	0.729187717
lnc-DUSP14-5	CHMP4B	0.711161134
lnc-DUXA-3	CHMP4B	0.843985863
lnc-DYNC1I1-5	CHMP4B	0.989188078
lnc-DYSF-12	CHMP4B	0.90129004
lnc-EAF2-3	CHMP4B	0.6921216
lnc-EBNA1BP2-1	CHMP4B	0.960148486
lnc-ECHDC3-1	CHMP4B	0.820778465
lnc-EDC3-5	CHMP4B	0.796323355
lnc-EEF1A1-1	CHMP4B	0.991934247
lnc-EEF1B2-2	CHMP4B	0.854194588
lnc-EEF1B2-3	CHMP4B	0.992206493
lnc-EFCAB5-2	CHMP4B	0.711251747
lnc-EGR4-2	CHMP4B	0.963718489
lnc-EIF2B1-3	CHMP4B	0.87744191
lnc-ENDOU-1	CHMP4B	0.821442686
lnc-EPN1-6	CHMP4B	0.72755998
lnc-EPOR-2	CHMP4B	0.874921732
lnc-ERAL1-3	CHMP4B	0.694726724
lnc-ERICH1-9	CHMP4B	-0.84527842
lnc-ERP44-1	CHMP4B	0.922631522
lnc-ESD-1	CHMP4B	0.870574646
lnc-ETNK2-7	CHMP4B	0.990031741
lnc-EXOC2-21	CHMP4B	-0.782410837
lnc-EXOSC6-2	CHMP4B	0.838288414
lnc-FABP3-1	CHMP4B	0.919617058
lnc-FABP3-3	CHMP4B	0.981433821
lnc-FAM102B-2	CHMP4B	0.993901077
lnc-FAM110B-11	CHMP4B	-0.693478698
lnc-FAM138A-3	CHMP4B	-0.691890464
lnc-FAM161B-2	CHMP4B	0.881713538
lnc-FAM162A-2	CHMP4B	0.808076665
lnc-FAM164C-2	CHMP4B	0.951120559
lnc-FAM178A-1	CHMP4B	0.766083683
lnc-FAM179A-1	CHMP4B	-0.75797708
lnc-FAM183A-3	CHMP4B	0.873942102
lnc-FAM198B-1	CHMP4B	0.915205094
lnc-FAM207A-8	CHMP4B	0.744608049
lnc-FAM210A-2	CHMP4B	0.922256663
lnc-FAM43A-2	CHMP4B	0.980706373
lnc-FAM55B-1	CHMP4B	0.702224382
lnc-FAM57A-2	CHMP4B	0.718178321
lnc-FAM59B-3	CHMP4B	0.724528102
lnc-FAM72B-2	CHMP4B	0.814353404
lnc-FAM82A1-10	CHMP4B	0.996296835
lnc-FAM96B-3	CHMP4B	0.834337942
lnc-FAT2-1	CHMP4B	0.99731
lnc-FBXW8-2	CHMP4B	0.723211194
lnc-FDFT1-1	CHMP4B	0.919731966
lnc-FEM1A-4	CHMP4B	0.830931549
lnc-FGFBP1-1	CHMP4B	0.877551741
lnc-FGFR1OP2-1	CHMP4B	0.704474659
lnc-FICD-2	CHMP4B	0.70336474
lnc-FIGNL1-1	CHMP4B	0.794080686
lnc-FKBP2-1	CHMP4B	0.997043381
lnc-FKRP-1	CHMP4B	0.73645056
lnc-FMN1-2	CHMP4B	-0.983611279
lnc-FMO5-1	CHMP4B	0.704152741
lnc-FOXM1-1	CHMP4B	0.899084002
lnc-FOXN1-1	CHMP4B	0.96757691
lnc-FSIP1-1	CHMP4B	0.74681277
lnc-FTSJ3-1	CHMP4B	0.818320733
lnc-G3BP2-1	CHMP4B	0.713451123
lnc-GADD45A-2	CHMP4B	0.939271128
lnc-GALNTL2-1	CHMP4B	-0.730443802
lnc-GAMT-7	CHMP4B	0.861628292
lnc-GARS-2	CHMP4B	0.722175781
lnc-GAS8-1	CHMP4B	-0.770676113
lnc-GATAD2B-1	CHMP4B	0.701451037
lnc-GCC1-1	CHMP4B	0.702279672
lnc-GCC2-1	CHMP4B	0.995462287
lnc-GDI2-1	CHMP4B	0.809586876
lnc-GGCT-1	CHMP4B	-0.893694071
lnc-GINS1-4	CHMP4B	0.726177565
lnc-GIP-5	CHMP4B	0.980512285
lnc-GJA4-2	CHMP4B	0.827666271
lnc-GK-3	CHMP4B	0.841116084
lnc-GLCCI1-1	CHMP4B	0.86718731
lnc-GLDN-2	CHMP4B	0.756209448
lnc-GLDN-3	CHMP4B	0.976116233
lnc-GLIPR1L1-2	CHMP4B	0.729781564
lnc-GLRX2-1	CHMP4B	0.937837265
lnc-GLUD1-2	CHMP4B	0.753431368
lnc-GNG13-5	CHMP4B	-0.782026761
lnc-GNS-3	CHMP4B	0.986578011
lnc-GOSR2-2	CHMP4B	0.878300133
lnc-GPLD1-1	CHMP4B	0.899012266
lnc-GPR101-3	CHMP4B	-0.715371168
lnc-GPR126-1	CHMP4B	0.718071038
lnc-GPR137C-2	CHMP4B	0.818331602
lnc-GPR160-1	CHMP4B	0.908857995
lnc-GPR27-5	CHMP4B	0.892797832
lnc-GPR98-8	CHMP4B	0.906493001
lnc-GPRC5D-1	CHMP4B	0.859333321
lnc-GPRC5D-3	CHMP4B	0.887822956
lnc-GPS1-1	CHMP4B	0.742012526
lnc-GRHL2-14	CHMP4B	0.801796403
lnc-GRIA3-5	CHMP4B	-0.695322505
lnc-GRM7-2	CHMP4B	-0.782269473
lnc-GTF2E2-2	CHMP4B	0.795534084
lnc-GTPBP1-1	CHMP4B	0.990730223
lnc-H2AFY2-1	CHMP4B	0.972262197
lnc-H3F3C-4	CHMP4B	0.75168156
lnc-HABP4-4	CHMP4B	0.938444749
lnc-HCN3-1	CHMP4B	0.816855992
lnc-HCN4-2	CHMP4B	0.725714509
lnc-HDLBP-2	CHMP4B	0.87558087
lnc-HDLBP-3	CHMP4B	0.897679315
lnc-HELZ-2	CHMP4B	0.802637074
lnc-HIP1R-1	CHMP4B	0.736089335
lnc-HKR1-3	CHMP4B	0.70212596
lnc-HMBOX1-8	CHMP4B	0.933640413
lnc-HMGA1-2	CHMP4B	0.727986265
lnc-HMGB2-1	CHMP4B	0.898836474
lnc-HOXA13-4	CHMP4B	0.763341493
lnc-HSP90AA1-1	CHMP4B	0.892282995
lnc-HSPB7-1	CHMP4B	0.725680641
lnc-HSPG2-1	CHMP4B	0.958463446
lnc-HTRA2-1	CHMP4B	-0.734608791
lnc-IARS2-2	CHMP4B	0.917398341
lnc-ID2-1	CHMP4B	0.936008151
lnc-ID4-2	CHMP4B	0.963048396
lnc-IFNG-3	CHMP4B	0.88295604
lnc-IFT46-1	CHMP4B	0.698055048
lnc-IGFBP7-1	CHMP4B	0.981441927
lnc-IGFL3-3	CHMP4B	-0.756277678
lnc-IKBIP-1	CHMP4B	0.822504007
lnc-IKZF1-2	CHMP4B	0.764004066
lnc-IKZF2-9	CHMP4B	0.835692325
lnc-IL12RB1-2	CHMP4B	0.918942911
lnc-IL2RG-4	CHMP4B	0.976548296
lnc-IL31RA-1	CHMP4B	0.993143226
lnc-ILKAP-4	CHMP4B	0.975143441
lnc-ING1-3	CHMP4B	0.917826515
lnc-INPPL1-1	CHMP4B	0.860926762
lnc-INTS12-1	CHMP4B	0.947485452
lnc-INTS12-2	CHMP4B	0.864753788
lnc-IQCG-2	CHMP4B	0.920209362
lnc-IQCG-6	CHMP4B	0.872850884
lnc-IRAK4-2	CHMP4B	0.857217543
lnc-IRF1-4	CHMP4B	0.87671926
lnc-IRF4-6	CHMP4B	0.73712314
lnc-IRGM-1	CHMP4B	0.880344242
lnc-ITIH3-4	CHMP4B	0.72812462
lnc-ITPR2-2	CHMP4B	0.831949167
lnc-JAG1-1	CHMP4B	0.800573778
lnc-JAG1-6	CHMP4B	0.742879529
lnc-JUNB-2	CHMP4B	0.689691032
lnc-KANK3-3	CHMP4B	0.950161657
lnc-KAT8-2	CHMP4B	0.958550113
lnc-KATNAL2-5	CHMP4B	0.95899207
lnc-KB-1980E6.3.1-6	CHMP4B	0.981568344
lnc-KBTBD3-1	CHMP4B	0.973589829
lnc-KCNH5-3	CHMP4B	0.921919472
lnc-KCNJ13-1	CHMP4B	0.740214994
lnc-KCNS3-11	CHMP4B	0.72059337
lnc-KCNT1-2	CHMP4B	0.931775251
lnc-KCTD18-1	CHMP4B	0.694237384
lnc-KCTD4-1	CHMP4B	0.861035371
lnc-KDM3A-1	CHMP4B	0.836406011
lnc-KHDRBS3-4	CHMP4B	-0.728866988
lnc-KIAA0020-2	CHMP4B	0.698792858
lnc-KIAA0020-7	CHMP4B	0.839070081
lnc-KIAA0087-2	CHMP4B	0.713390534
lnc-KIAA0125-2	CHMP4B	-0.807623654
lnc-KIAA0196-5	CHMP4B	0.856419552
lnc-KIAA0319-1	CHMP4B	0.77512118
lnc-KIAA0564-2	CHMP4B	0.755550449
lnc-KIAA0664-2	CHMP4B	0.870963232
lnc-KIAA1147-1	CHMP4B	0.762903317
lnc-KIAA1429-6	CHMP4B	0.991761087
lnc-KIAA1609-1	CHMP4B	0.776573966
lnc-KIAA1731-1	CHMP4B	0.92100525
lnc-KIAA1919-8	CHMP4B	0.721580699
lnc-KIF26A-1	CHMP4B	-0.748336415
lnc-KIF26B-4	CHMP4B	-0.749289914
lnc-KLHDC10-2	CHMP4B	0.73204471
lnc-KLHL20-1	CHMP4B	0.725923976
lnc-KLHL22-2	CHMP4B	0.686609669
lnc-KLHL25-12	CHMP4B	0.7348125
lnc-KLHL25-6	CHMP4B	0.875244169
lnc-KLHL31-8	CHMP4B	0.757710593
lnc-KNTC1-3	CHMP4B	-0.688534741
lnc-KRBA1-2	CHMP4B	0.787177769
lnc-KRT80-10	CHMP4B	0.972026116
lnc-L3MBTL2-1	CHMP4B	0.693230079
lnc-LAD1-1	CHMP4B	-0.747408149
lnc-LAT2-2	CHMP4B	0.984886316
lnc-LEO1-2	CHMP4B	0.914607735
lnc-LEO1-4	CHMP4B	0.966686684
lnc-LEPRE1-1	CHMP4B	0.963759295
lnc-LEPROTL1-9	CHMP4B	-0.692564485
lnc-LETM2-2	CHMP4B	0.839109566
lnc-LETM2-5	CHMP4B	0.909613071
lnc-LIPG-2	CHMP4B	0.859797799
lnc-LMTK3-1	CHMP4B	0.693789462
lnc-LOH12CR1-1	CHMP4B	0.922745971
lnc-LOH12CR1-5	CHMP4B	0.694922967
lnc-LOXL1-1	CHMP4B	0.928233847
lnc-LPIN2-1	CHMP4B	0.984194303
lnc-LRRC1-5	CHMP4B	0.971592212
lnc-LRRC38-2	CHMP4B	0.95177398
lnc-LRRC57-1	CHMP4B	0.887798347
lnc-LRRC57-2	CHMP4B	0.711192456
lnc-LRRFIP2-1	CHMP4B	0.872132518
lnc-LRRN4-2	CHMP4B	0.981210349
lnc-LRSAM1-1	CHMP4B	0.719104293
lnc-LSG1-4	CHMP4B	0.943159101
lnc-LSM5-2	CHMP4B	0.930178789
lnc-LSS-1	CHMP4B	0.906192364
lnc-LTBR-6	CHMP4B	0.977887006
lnc-LUZP1-3	CHMP4B	0.844587633
lnc-LXN-1	CHMP4B	0.989982199
lnc-LYRM2-2	CHMP4B	0.773943725
lnc-MACC1-1	CHMP4B	0.902154689
lnc-MAFF-2	CHMP4B	0.695480155
lnc-MAFF-6	CHMP4B	0.70099364
lnc-MAN2A2-2	CHMP4B	0.715272841
lnc-MANSC4-2	CHMP4B	0.922645385
lnc-MAP1LC3B-9	CHMP4B	0.711775098
lnc-MAP4K3-2	CHMP4B	0.878874252
lnc-MAP6-1	CHMP4B	0.936784745
lnc-MAPK6-5	CHMP4B	0.873165748
lnc-MAPK6-8	CHMP4B	0.85897809
lnc-MAPK6-9	CHMP4B	0.737133792
lnc-MARCH10-4	CHMP4B	-0.713988509
lnc-MARCH4-1	CHMP4B	0.896042147
lnc-MATN2-1	CHMP4B	0.7922613
lnc-MBOAT1-13	CHMP4B	0.696176645
lnc-MBTPS2-2	CHMP4B	-0.69252513
lnc-MCTS1-2	CHMP4B	0.755396078
lnc-MDM4-8	CHMP4B	0.914249377
lnc-MDS2-1	CHMP4B	-0.735828653
lnc-MEST-2	CHMP4B	0.848118721
lnc-MFN1-1	CHMP4B	0.770770245
lnc-MFSD2A-1	CHMP4B	0.751187896
lnc-MFSD4-1	CHMP4B	0.855605763
lnc-MFSD9-4	CHMP4B	0.996014353
lnc-MINA-9	CHMP4B	0.732616579
lnc-MIXL1-2	CHMP4B	0.97380044
lnc-MKI67IP-8	CHMP4B	0.712965674
lnc-MKLN1-1	CHMP4B	0.763726326
lnc-MLST8-1	CHMP4B	0.965838869
lnc-MLX-3	CHMP4B	0.700630083
lnc-MMP15-1	CHMP4B	0.994793249
lnc-MMP23B-3	CHMP4B	0.934252686
lnc-MOCS2-3	CHMP4B	0.879505746
lnc-MORC2-1	CHMP4B	0.964585371
lnc-MORC2-2	CHMP4B	0.702095305
lnc-MORC2-5	CHMP4B	-0.68702395
lnc-MPEG1-2	CHMP4B	0.872892112
lnc-MPHOSPH10-2	CHMP4B	0.928484367
lnc-MPI-1	CHMP4B	0.939100147
lnc-MPP7-8	CHMP4B	-0.860966179
lnc-MRC2-1	CHMP4B	0.74281468
lnc-MRP63-6	CHMP4B	0.881073844
lnc-MRPL39-20	CHMP4B	0.931915852
lnc-MRPL40-4	CHMP4B	0.796438878
lnc-MRPL47-2	CHMP4B	0.942076382
lnc-MRPL9-2	CHMP4B	0.773863094
lnc-MRPS11-2	CHMP4B	0.721959264
lnc-MRPS16-1	CHMP4B	0.825629424
lnc-MRPS24-2	CHMP4B	0.803178638
lnc-MRPS25-5	CHMP4B	0.693342545
lnc-MRPS27-10	CHMP4B	0.744806447
lnc-MRTO4-2	CHMP4B	0.897840955
lnc-MSI2-5	CHMP4B	0.781410872
lnc-MST1-2	CHMP4B	0.82155094
lnc-MTIF3-2	CHMP4B	0.850451635
lnc-MTMR2-1	CHMP4B	-0.754779471
lnc-MTMR2-2	CHMP4B	0.807817821
lnc-MTO1-1	CHMP4B	0.757324738
lnc-MUC20-10	CHMP4B	0.924173205
lnc-MUTYH-1	CHMP4B	0.722373775
lnc-MYL12A-1	CHMP4B	0.84083261
lnc-MYL4-1	CHMP4B	0.992160859
lnc-MYL6-2	CHMP4B	0.794645213
lnc-MYO19-2	CHMP4B	-0.687924194
lnc-MYOM1-1	CHMP4B	0.705293134
lnc-MZT2B-1	CHMP4B	0.976938501
lnc-NAA11-1	CHMP4B	0.73368601
lnc-NAA50-1	CHMP4B	0.867240575
lnc-NAA50-3	CHMP4B	0.912944851
lnc-NAB2-1	CHMP4B	-0.73380956
lnc-NBAS-15	CHMP4B	0.778094173
lnc-NBN-1	CHMP4B	-0.694027047
lnc-NBPF15-2	CHMP4B	0.92573917
lnc-NBPF9-4	CHMP4B	-0.699930047
lnc-NCOA3-9	CHMP4B	-0.877459673
lnc-NDE1-3	CHMP4B	0.97240396
lnc-NDFIP2-13	CHMP4B	0.920094375
lnc-NDUFAB1-1	CHMP4B	0.801253789
lnc-NDUFAF2-1	CHMP4B	0.998052588
lnc-NDUFAF2-2	CHMP4B	0.698473353
lnc-NDUFAF3-1	CHMP4B	0.87958653
lnc-NDUFB3-3	CHMP4B	0.696570671
lnc-NDUFB9-1	CHMP4B	0.721973846
lnc-NDUFS6-16	CHMP4B	0.703135295
lnc-NDUFS6-17	CHMP4B	0.895512066
lnc-NDUFV1-6	CHMP4B	0.958178239
lnc-NEDD1-8	CHMP4B	-0.689242478
lnc-NEK5-1	CHMP4B	0.930702652
lnc-NEMF-1	CHMP4B	0.696288606
lnc-NEURL2-1	CHMP4B	0.800746824
lnc-NFAT5-1	CHMP4B	0.869455593
lnc-NFATC3-1	CHMP4B	0.797356857
lnc-NFKBIB-5	CHMP4B	0.876470208
lnc-NID2-5	CHMP4B	0.913528599
lnc-NIPAL1-2	CHMP4B	0.92638143
lnc-NIPBL-1	CHMP4B	0.709997686
lnc-NLN-2	CHMP4B	-0.745739873
lnc-NLRP2-2	CHMP4B	0.891682134
lnc-NLRP3-4	CHMP4B	0.889071175
lnc-NMBR-2	CHMP4B	-0.69445708
lnc-NNT-5	CHMP4B	0.816490794
lnc-NPAS2-2	CHMP4B	0.862120172
lnc-NPAT-2	CHMP4B	0.843091353
lnc-NPHS2-3	CHMP4B	0.946761213
lnc-NPIPL2-3	CHMP4B	0.734326644
lnc-NR2C2-1	CHMP4B	0.78820972
lnc-NRIP1-2	CHMP4B	-0.720431088
lnc-NRIP2-1	CHMP4B	0.692846816
lnc-NSMCE1-1	CHMP4B	0.857521265
lnc-NSUN7-1	CHMP4B	0.733074578
lnc-NUDT16-1	CHMP4B	-0.765055825
lnc-NUDT5-1	CHMP4B	0.866661701
lnc-NUP107-1	CHMP4B	0.724915035
lnc-NXPH2-3	CHMP4B	-0.753292835
lnc-OAZ3-6	CHMP4B	0.995819565
lnc-ODF3L2-2	CHMP4B	0.782005306
lnc-ODZ1-6	CHMP4B	0.971798769
lnc-OR4F16-8	CHMP4B	0.907875298
lnc-OR4M2-12	CHMP4B	-0.793524813
lnc-OR7C2-1	CHMP4B	0.889465672
lnc-ORC3-1	CHMP4B	0.774404529
lnc-ORC3-2	CHMP4B	0.776174031
lnc-ORC4-1	CHMP4B	0.961483061
lnc-OSBPL9-3	CHMP4B	0.780401992
lnc-OTP-5	CHMP4B	0.937563224
lnc-OTUD6B-1	CHMP4B	0.863048178
lnc-OTUD6B-2	CHMP4B	0.971021473
lnc-OXNAD1-6	CHMP4B	0.838238433
lnc-OXSM-2	CHMP4B	0.923468073
lnc-P4HA3-1	CHMP4B	0.779143902
lnc-PABPC1L2B-2	CHMP4B	0.946911292
lnc-PADI4-2	CHMP4B	0.821891332
lnc-PAH-3	CHMP4B	-0.968207897
lnc-PAICS-2	CHMP4B	0.883197309
lnc-PANK3-16	CHMP4B	-0.700984949
lnc-PAPLN-1	CHMP4B	0.870692097
lnc-PARP2-1	CHMP4B	0.980450553
lnc-PCCA-2	CHMP4B	0.71786072
lnc-PCDH12-1	CHMP4B	0.938471879
lnc-PCK1-4	CHMP4B	-0.686378495
lnc-PCM1-3	CHMP4B	0.870214484
lnc-PDCD4-1	CHMP4B	0.696339512
lnc-PDE8A-2	CHMP4B	-0.80727519
lnc-PDGFRL-2	CHMP4B	0.922443076
lnc-PDZD7-2	CHMP4B	0.775118116
lnc-PEA15-1	CHMP4B	0.7366913
lnc-PEAK1.1-5	CHMP4B	0.99174841
lnc-PER2-5	CHMP4B	0.693390844
lnc-PFKP-16	CHMP4B	-0.782794122
lnc-PHF10-1	CHMP4B	0.729594858
lnc-PHLDB1-1	CHMP4B	0.993530498
lnc-PHLPP2-1	CHMP4B	0.706277228
lnc-PHRF1-1	CHMP4B	0.700784752
lnc-PHYHIP-1	CHMP4B	0.884657557
lnc-PI4KA-2	CHMP4B	0.982416348
lnc-PIGB-2	CHMP4B	0.907618469
lnc-PIGG-2	CHMP4B	0.814256985
lnc-PIGL-1	CHMP4B	0.9880062
lnc-PIGU-3	CHMP4B	0.988379858
lnc-PIGY-5	CHMP4B	0.749296599
lnc-PINK1-2	CHMP4B	0.931906852
lnc-PLA2G2D-1	CHMP4B	0.854515048
lnc-PLAC8L1-1	CHMP4B	0.939217284
lnc-PLAT-4	CHMP4B	0.689396115
lnc-PLCG1-1	CHMP4B	0.705495868
lnc-PLD3-3	CHMP4B	0.690934806
lnc-PLD6-1	CHMP4B	0.72453536
lnc-PLEKHH1-1	CHMP4B	0.721668691
lnc-PLXND1-2	CHMP4B	0.714587522
lnc-PMEL-1	CHMP4B	0.719584003
lnc-PMM2-1	CHMP4B	0.889179238
lnc-PNLIPRP1-1	CHMP4B	0.852552016
lnc-PNMA1-1	CHMP4B	0.720691503
lnc-PNMA2-1	CHMP4B	0.901208825
lnc-PNO1-1	CHMP4B	0.909302612
lnc-POC1B-GALNT4-2	CHMP4B	0.987585021
lnc-POC5-1	CHMP4B	0.855842221
lnc-PODXL-3	CHMP4B	0.874529624
lnc-POLE4-6	CHMP4B	0.731682374
lnc-POLH-1	CHMP4B	0.99483582
lnc-POLR1E-4	CHMP4B	0.88419734
lnc-POTEB-5	CHMP4B	-0.936444991
lnc-POTEM-4	CHMP4B	0.819956301
lnc-POU5F1B-10	CHMP4B	-0.747386878
lnc-PPAP2A-1	CHMP4B	0.995977693
lnc-PPDPF-3	CHMP4B	0.701941396
lnc-PPIAL4C-9	CHMP4B	0.95627033
lnc-PPM1D-1	CHMP4B	-0.753415339
lnc-PPP1CB-1	CHMP4B	0.841319602
lnc-PPP1R13B-1	CHMP4B	0.751216177
lnc-PPP1R14B-1	CHMP4B	0.977668658
lnc-PPP1R26-1	CHMP4B	0.967963471
lnc-PPP1R3A-4	CHMP4B	0.724744066
lnc-PPP1R3G-3	CHMP4B	-0.837957243
lnc-PPP2R5B-4	CHMP4B	0.804658343
lnc-PPP4C-1	CHMP4B	0.861922048
lnc-PPP4R1-18	CHMP4B	0.69058827
lnc-PPP4R1L-1	CHMP4B	0.832223956
lnc-PRDM2-2	CHMP4B	0.881864942
lnc-PRDM4-4	CHMP4B	0.78241454
lnc-PRKAR1A-7	CHMP4B	0.71450061
lnc-PRMT8-6	CHMP4B	0.691162564
lnc-PRPF4B-5	CHMP4B	0.93353361
lnc-PRR15L-2	CHMP4B	0.772375203
lnc-PRR15L-3	CHMP4B	0.781143918
lnc-PSMB11-1	CHMP4B	0.840370593
lnc-PSMC1-1	CHMP4B	0.944405678
lnc-PSME1-1	CHMP4B	0.735723375
lnc-PSME4-2	CHMP4B	0.972717585
lnc-PTDSS1-1	CHMP4B	0.953119399
lnc-PTGDR2-1	CHMP4B	0.857964353
lnc-PTGER4-4	CHMP4B	0.99444397
lnc-PTPLA-2	CHMP4B	0.829865522
lnc-PTPN6-1	CHMP4B	0.829603521
lnc-PTPRZ1-5	CHMP4B	0.721058584
lnc-PTTG1-6	CHMP4B	0.799151899
lnc-PUS7-2	CHMP4B	0.885936323
lnc-PXDC1-12	CHMP4B	0.809609048
lnc-QDPR-2	CHMP4B	0.952705298
lnc-RAB17-2	CHMP4B	0.8584488
lnc-RAB3A-3	CHMP4B	0.738849475
lnc-RAB3GAP2-1	CHMP4B	0.688447508
lnc-RABL2A-5	CHMP4B	0.778804087
lnc-RAD9B-1	CHMP4B	0.889390826
lnc-RAI1-1	CHMP4B	0.936638646
lnc-RALB-8	CHMP4B	0.752423784
lnc-RANBP1-1	CHMP4B	0.913285964
lnc-RAPH1-6	CHMP4B	0.995951215
lnc-RASAL1-1	CHMP4B	0.950225205
lnc-RB1-2	CHMP4B	0.992027075
lnc-RBM26-1	CHMP4B	0.742168105
lnc-RC3H1-1	CHMP4B	0.896271032
lnc-RCAN3-1	CHMP4B	0.966052514
lnc-RELL2-1	CHMP4B	0.834165797
lnc-RFC2-4	CHMP4B	0.836297622
lnc-RFC2-5	CHMP4B	-0.686947014
lnc-RFC4-1	CHMP4B	0.845767459
lnc-RFXAP-2	CHMP4B	0.930194273
lnc-RGS18-6	CHMP4B	0.862043935
lnc-RHBDD3-1	CHMP4B	-0.697892888
lnc-RHOC-1	CHMP4B	0.750219444
lnc-RHOQ-1	CHMP4B	0.979387644
lnc-RHOQ-2	CHMP4B	0.989710771
lnc-RIC8A-2	CHMP4B	0.715036235
lnc-RIIAD1-3	CHMP4B	0.705896207
lnc-RIMS3-2	CHMP4B	0.96056125
lnc-RIMS3-3	CHMP4B	0.969348284
lnc-RIPK2-2	CHMP4B	0.94736038
lnc-RLIM-8	CHMP4B	0.698759373
lnc-RMI1-1	CHMP4B	0.855821467
lnc-RNF121-5	CHMP4B	0.817130962
lnc-RNF125-2	CHMP4B	0.698159659
lnc-RNF139-2	CHMP4B	0.872036008
lnc-RNF146-2	CHMP4B	0.976597645
lnc-RNF149-2	CHMP4B	0.972355164
lnc-RNF24-5	CHMP4B	0.934900308
lnc-RP11-1012A1.4.1-2	CHMP4B	0.795660577
lnc-RP11-10A14.4.1-1	CHMP4B	0.829450149
lnc-RP11-1105G2.3.1-3	CHMP4B	0.937017341
lnc-RP11-116D17.1.1-10	CHMP4B	0.982837088
lnc-RP11-116D17.1.1-4	CHMP4B	-0.723331302
lnc-RP11-180C1.1.1-8	CHMP4B	-0.728987815
lnc-RP11-181C3.1.1-9	CHMP4B	0.864948508
lnc-RP11-210M15.2.1-6	CHMP4B	0.927316761
lnc-RP11-324D17.2.1-3	CHMP4B	-0.983487805
lnc-RP11-582J16.5.1-4	CHMP4B	0.843205619
lnc-RP11-712L6.5.1-3	CHMP4B	0.96246046
lnc-RP3-486B10.1.1-4	CHMP4B	0.788607092
lnc-RPF1-1	CHMP4B	0.868551767
lnc-RPL14-2	CHMP4B	0.831609572
lnc-RPL24-1	CHMP4B	0.702092629
lnc-RPL30-1	CHMP4B	0.759235521
lnc-RPS24-8	CHMP4B	0.973681181
lnc-RPS27L-1	CHMP4B	0.954443178
lnc-RPUSD2-1	CHMP4B	0.727502481
lnc-RSPH1-3	CHMP4B	-0.798341144
lnc-RUNX1-4	CHMP4B	0.72612031
lnc-RWDD3-1	CHMP4B	-0.792189303
lnc-S100A13-1	CHMP4B	0.936218178
lnc-S100A7A-1	CHMP4B	-0.778792005
lnc-SAA2-2	CHMP4B	0.920006969
lnc-SAMD5-1	CHMP4B	-0.734558478
lnc-SAP30-2	CHMP4B	-0.700215958
lnc-SAR1B-1	CHMP4B	0.964644681
lnc-SBF2-1	CHMP4B	-0.689810591
lnc-SBF2-4	CHMP4B	0.712547866
lnc-SCARB2-1	CHMP4B	0.718398231
lnc-SCLT1-4	CHMP4B	0.693040794
lnc-SCN2A-6	CHMP4B	0.771177267
lnc-SCN2A-8	CHMP4B	0.690852049
lnc-SDCCAG8-1	CHMP4B	0.766088871
lnc-SEBOX-1	CHMP4B	0.855256176
lnc-SEC22C-2	CHMP4B	0.981876085
lnc-SEC23A-3	CHMP4B	0.73847745
lnc-SEMA5B-1	CHMP4B	0.727341723
lnc-SENP6-12	CHMP4B	0.869592215
lnc-SEPT14-2	CHMP4B	0.983317356
lnc-SERHL2-7	CHMP4B	0.993292919
lnc-SERPINB6-1	CHMP4B	0.762156893
lnc-SERPINE2-1	CHMP4B	0.96191763
lnc-SETD1B-3	CHMP4B	0.849320594
lnc-SETD5-1	CHMP4B	0.71708504
lnc-SETD8-1	CHMP4B	0.876361457
lnc-SFN-1	CHMP4B	0.723865838
lnc-SGCG-11	CHMP4B	0.759004713
lnc-SGSH-1	CHMP4B	0.796704369
lnc-SH2D3A-2	CHMP4B	0.832764522
lnc-SH2D7-3	CHMP4B	0.968844242
lnc-SH3BGRL2-9	CHMP4B	0.898289822
lnc-SH3RF1-2	CHMP4B	0.980449431
lnc-SH3RF2-1	CHMP4B	0.948525426
lnc-SHANK2-3	CHMP4B	0.905208464
lnc-SHARPIN-4	CHMP4B	0.832564026
lnc-SHB-1	CHMP4B	0.714590783
lnc-SIGLEC16-4	CHMP4B	0.695228842
lnc-SIRPG-1	CHMP4B	-0.804207184
lnc-SIVA1-1	CHMP4B	0.856312543
lnc-SKA2-2	CHMP4B	0.997242457
lnc-SKIV2L2-1	CHMP4B	0.975623326
lnc-SLA2-1	CHMP4B	0.857053712
lnc-SLC12A2-3	CHMP4B	0.726573528
lnc-SLC16A6-2	CHMP4B	0.989505007
lnc-SLC24A5-5	CHMP4B	0.970477038
lnc-SLC25A16-2	CHMP4B	0.726002293
lnc-SLC25A21-4	CHMP4B	0.947545626
lnc-SLC25A29-1	CHMP4B	0.863676754
lnc-SLC25A31-2	CHMP4B	0.813911508
lnc-SLC25A47-2	CHMP4B	0.877065995
lnc-SLC25A47-5	CHMP4B	0.831119847
lnc-SLC2A1-1	CHMP4B	0.734148501
lnc-SLC2A6-2	CHMP4B	0.838687778
lnc-SLC35F5-17	CHMP4B	0.754493928
lnc-SLC36A1-5	CHMP4B	0.806250712
lnc-SLC38A8-9	CHMP4B	0.776418702
lnc-SLC39A10-10	CHMP4B	0.762325046
lnc-SLC39A6-1	CHMP4B	0.989295651
lnc-SLC3A2-3	CHMP4B	0.929331711
lnc-SLC46A2-1	CHMP4B	0.939665732
lnc-SLCO2B1-3	CHMP4B	0.703519911
lnc-SLFN12-1	CHMP4B	-0.802117317
lnc-SLMO1-1	CHMP4B	0.804975009
lnc-SLTM-1	CHMP4B	0.984841074
lnc-SMARCC2-5	CHMP4B	0.865652905
lnc-SMARCC2-7	CHMP4B	0.780398806
lnc-SMCR7-2	CHMP4B	0.853877885
lnc-SMG1-2	CHMP4B	0.902325723
lnc-SNRNP35-1	CHMP4B	0.831994157
lnc-SNTG2-3	CHMP4B	0.926806085
lnc-SNX20-3	CHMP4B	0.943533333
lnc-SNX20-5	CHMP4B	0.937670096
lnc-SNX33-1	CHMP4B	0.712001481
lnc-SNX33-2	CHMP4B	0.701075645
lnc-SP110-5	CHMP4B	0.864680512
lnc-SPATA12-2	CHMP4B	0.918745657
lnc-SPERT-4	CHMP4B	0.988238393
lnc-SPG11-3	CHMP4B	0.719417066
lnc-SPIN3-5	CHMP4B	0.891119307
lnc-SPP1-1	CHMP4B	-0.693552754
lnc-SPRED2-11	CHMP4B	0.856582527
lnc-SPRYD3-1	CHMP4B	0.86853503
lnc-SPTBN2-3	CHMP4B	0.899119321
lnc-SPTBN5-1	CHMP4B	0.696269843
lnc-SPTBN5-2	CHMP4B	0.990801994
lnc-SRPK2-5	CHMP4B	0.694479908
lnc-SRPK2-7	CHMP4B	0.727198072
lnc-SRPX2-2	CHMP4B	0.839705473
lnc-SRSF5-2	CHMP4B	0.812860361
lnc-SSBP4-2	CHMP4B	0.69495774
lnc-ST3GAL1-1	CHMP4B	0.988310473
lnc-ST6GAL2-1	CHMP4B	-0.690168568
lnc-ST7L-1	CHMP4B	0.937074648
lnc-ST7L-3	CHMP4B	0.794769551
lnc-STAG3L4-5	CHMP4B	0.862374086
lnc-STAP1-12	CHMP4B	0.856586265
lnc-STARD9-1	CHMP4B	0.90869404
lnc-STAT1-1	CHMP4B	0.979785218
lnc-STS-1	CHMP4B	0.729232788
lnc-STYX-2	CHMP4B	0.817790288
lnc-SUSD1-1	CHMP4B	-0.95798207
lnc-SYNE2-1	CHMP4B	0.828586905
lnc-SYT15-3	CHMP4B	0.932170707
lnc-TAF13-2	CHMP4B	0.77153258
lnc-TAF1A-1	CHMP4B	0.973330658
lnc-TAF1D-1	CHMP4B	0.777448815
lnc-TAF9-7	CHMP4B	-0.693051679
lnc-TATDN1-2	CHMP4B	0.893615099
lnc-TBL1XR1-6	CHMP4B	-0.787354503
lnc-TBP-3	CHMP4B	0.882082776
lnc-TCF7-4	CHMP4B	0.708434845
lnc-TCHP-1	CHMP4B	0.856271062
lnc-TCP1-2	CHMP4B	0.968877629
lnc-TCTA-1	CHMP4B	0.790431712
lnc-TEFM-5	CHMP4B	0.688027664
lnc-TESC-4	CHMP4B	0.984487841
lnc-TFB2M-1	CHMP4B	0.909572145
lnc-THBS4-1	CHMP4B	0.876278333
lnc-THBS4-6	CHMP4B	0.762071705
lnc-THRSP-2	CHMP4B	0.978579281
lnc-THSD4-4	CHMP4B	0.915995909
lnc-THUMPD2-1	CHMP4B	0.725218465
lnc-TICAM1-1	CHMP4B	0.991496936
lnc-TIGD1L2-6	CHMP4B	0.987840359
lnc-TIGD6-1	CHMP4B	0.764468527
lnc-TLCD1-3	CHMP4B	0.862449732
lnc-TLE2-1	CHMP4B	0.76329517
lnc-TM2D2-1	CHMP4B	0.900917787
lnc-TMC5-1	CHMP4B	0.932943945
lnc-TMEM116-1	CHMP4B	0.711969351
lnc-TMEM123-1	CHMP4B	0.96011626
lnc-TMEM126B-4	CHMP4B	-0.74053078
lnc-TMEM138-4	CHMP4B	0.981021189
lnc-TMEM147-1	CHMP4B	0.950656851
lnc-TMEM156-1	CHMP4B	0.822906928
lnc-TMEM164-2	CHMP4B	0.955638189
lnc-TMEM180-3	CHMP4B	0.923237992
lnc-TMEM194B-6	CHMP4B	0.858642521
lnc-TMEM22-2	CHMP4B	0.848527203
lnc-TMEM220-1	CHMP4B	0.707332323
lnc-TMEM27-1	CHMP4B	0.837615903
lnc-TMEM41B-4	CHMP4B	0.92843295
lnc-TMEM50B-2	CHMP4B	0.8837219
lnc-TMEM50B-3	CHMP4B	0.863899986
lnc-TMEM75-8	CHMP4B	-0.966425564
lnc-TMEM85-1	CHMP4B	0.90564599
lnc-TMEM85-2	CHMP4B	0.823135549
lnc-TMPRSS2-1	CHMP4B	0.807530443
lnc-TMSB15A-5	CHMP4B	0.902656722
lnc-TMTC3-14	CHMP4B	0.922067319
lnc-TMUB2-1	CHMP4B	0.800990383
lnc-TNFRSF11B-2	CHMP4B	0.977951816
lnc-TNN-1	CHMP4B	0.748144835
lnc-TNNC2-1	CHMP4B	0.723834778
lnc-TNP1-4	CHMP4B	0.79355029
lnc-TOMM20L-1	CHMP4B	0.973222681
lnc-TOP1MT-5	CHMP4B	0.737834638
lnc-TOR1AIP1-1	CHMP4B	0.695944615
lnc-TOR1AIP1-2	CHMP4B	0.686609014
lnc-TOR3A-1	CHMP4B	0.89164153
lnc-TPCN2-1	CHMP4B	0.686381169
lnc-TRAPPC12-1	CHMP4B	0.827344244
lnc-TRAPPC4-1	CHMP4B	0.744932315
lnc-TREX1-2	CHMP4B	0.734988016
lnc-TRIAP1-2	CHMP4B	0.862166348
lnc-TRIM16-4	CHMP4B	0.906629156
lnc-TRIM69-1	CHMP4B	0.737399701
lnc-TRIP10-4	CHMP4B	0.906947861
lnc-TRMT1L-2	CHMP4B	0.925403536
lnc-TRNT1-1	CHMP4B	0.969960368
lnc-TRPV2-5	CHMP4B	0.701490371
lnc-TSC1-1	CHMP4B	0.744479285
lnc-TSHZ3-2	CHMP4B	0.835683436
lnc-TSN-4	CHMP4B	0.709685519
lnc-TSPYL4-1	CHMP4B	0.939322157
lnc-TTC23-5	CHMP4B	-0.798566999
lnc-TTC26-4	CHMP4B	0.959314393
lnc-TTC26-5	CHMP4B	0.723645441
lnc-TUBA1C-3	CHMP4B	0.705094185
lnc-TUBGCP4-1	CHMP4B	0.901385592
lnc-TUBGCP6-5	CHMP4B	0.92438902
lnc-TUFM-1	CHMP4B	0.70996427
lnc-TUSC5-5	CHMP4B	0.850728593
lnc-TWIST1-1	CHMP4B	0.772668617
lnc-UBE2B-1	CHMP4B	0.956202106
lnc-UBE2N-1	CHMP4B	-0.691328483
lnc-UGP2-4	CHMP4B	0.965926603
[truncated: 9,238 more rows]
