# Supplementary material for: LncRNAs induce oxidative stress and spermatogenesis by regulating endoplasmic reticulum genes and pathways
Source: Aging (Albany NY). 2021 May 6;13(10):13764–87. doi: 10.18632/aging.202971 (PMC8202879; doi:10.18632/aging.202971)
Supplement: Supplementary Table 11 [file aging-13-202971-s011.csv]

Supplementary Table 11. ER_correlation_network.
Var1	Var2	value
BOLA3-AS1	BCL2L11	0.748672211
lnc-ABCD3-1	BCL2L11	-0.74759179
lnc-AC008686.1-4	BCL2L11	0.727362933
lnc-AC092295.7.1-2	BCL2L11	0.776149493
lnc-ACVR2B-1	BCL2L11	0.80149655
lnc-ADAM17-1	BCL2L11	0.70988756
lnc-AL136219.1-3	BCL2L11	0.693972956
lnc-B4GALT7-1	BCL2L11	0.765227444
lnc-BTD-1	BCL2L11	0.697830138
lnc-C12orf63-3	BCL2L11	0.757550946
lnc-C15orf48-1	BCL2L11	0.768572093
lnc-C17orf104-1	BCL2L11	0.759658924
lnc-C2orf40-8	BCL2L11	0.827758027
lnc-C5orf27-4	BCL2L11	0.763254017
lnc-C6orf105-5	BCL2L11	0.730119259
lnc-C6orf146-4	BCL2L11	0.767982724
lnc-CAPN13-1	BCL2L11	0.745187771
lnc-CCDC125-22	BCL2L11	0.737489884
lnc-CCDC70-2	BCL2L11	0.82593039
lnc-CD80-2	BCL2L11	0.793162883
lnc-CREM-6	BCL2L11	0.688354196
lnc-DALRD3-1	BCL2L11	0.72004059
lnc-DLX2-3	BCL2L11	0.765847774
lnc-EAF2-3	BCL2L11	0.742254583
lnc-EEF1B2-2	BCL2L11	0.692344479
lnc-EPOR-2	BCL2L11	0.698955521
lnc-GARS-2	BCL2L11	0.706328386
lnc-GLIPR1L1-2	BCL2L11	0.743321823
lnc-GPR27-5	BCL2L11	0.740717333
lnc-HPCAL1-2	BCL2L11	0.80156421
lnc-ILK-1	BCL2L11	0.708722625
lnc-ILK-6	BCL2L11	0.689931425
lnc-KDM3A-1	BCL2L11	0.798166528
lnc-KIAA1609-1	BCL2L11	0.800664173
lnc-MKLN1-1	BCL2L11	0.784963609
lnc-MRPS11-2	BCL2L11	0.754029469
lnc-MRPS24-2	BCL2L11	0.78828129
lnc-NAA50-3	BCL2L11	0.711685971
lnc-NDUFS1-2	BCL2L11	0.743416708
lnc-NDUFS6-15	BCL2L11	0.716884946
lnc-ODF4-2	BCL2L11	0.732826258
lnc-PLXND1-2	BCL2L11	0.706331603
lnc-PRDM4-4	BCL2L11	0.723204303
lnc-PTEN-12	BCL2L11	0.750040149
lnc-PXDC1-12	BCL2L11	0.765848543
lnc-RABL2A-5	BCL2L11	0.762486863
lnc-RALB-8	BCL2L11	0.734096402
lnc-RBM10-1	BCL2L11	0.781496987
lnc-RP11-116D17.1.1-4	BCL2L11	-0.768723555
lnc-RP11-582J16.5.1-4	BCL2L11	0.715264435
lnc-RPL30-1	BCL2L11	0.691742135
lnc-SDCCAG8-1	BCL2L11	0.688832198
lnc-SWSAP1-1	BCL2L11	0.81289044
lnc-TBP-3	BCL2L11	0.722921708
lnc-TCHP-1	BCL2L11	0.713220235
lnc-TCP10L-3	BCL2L11	0.76339693
lnc-TMEM161B-4	BCL2L11	0.699575262
lnc-TOR3A-1	BCL2L11	0.724974194
lnc-TSHZ3-2	BCL2L11	0.765895139
lnc-TSKS-1	BCL2L11	0.78721418
lnc-ZFP62-1	BCL2L11	0.708777712
lnc-ZNF585A-3	BCL2L11	0.808271669
lnc-ZNF727-6	BCL2L11	0.77521124
lnc-ZNF780B-1	BCL2L11	0.688459629
lnc-ZNF790-1	BCL2L11	0.736912293
STARD4-AS1	BCL2L11	0.799140023
TRIM52-AS1	BCL2L11	0.712888497
XLOC_1174280	BCL2L11	0.76477613
XLOC_1230810	BCL2L11	0.792290718
XLOC_1586489	BCL2L11	0.80817682
XLOC_1830341	BCL2L11	0.700362122
XLOC_2032959	BCL2L11	0.703212463
XLOC_2217616	BCL2L11	0.964640569
XLOC_2393336	BCL2L11	0.792092657
XLOC_375823	BCL2L11	0.735125644
XLOC_379277	BCL2L11	-0.759562468
XLOC_753555	BCL2L11	0.955697207
ZNF793-AS1	BCL2L11	0.824808034
ARSD-AS1	CEBPZ	0.92246244
B3GALT5-AS1	CEBPZ	-0.691915435
BIRC6-AS1	CEBPZ	0.741341467
BOLA3-AS1	CEBPZ	0.893877627
C1RL-AS1	CEBPZ	0.709038319
CASC15	CEBPZ	-0.817830694
CASK-AS1	CEBPZ	0.856572988
CCDC144NL-AS1	CEBPZ	0.704733579
CFLAR-AS1	CEBPZ	0.891252887
CNOT10-AS1	CEBPZ	0.897657955
DCTN1-AS1	CEBPZ	0.913715023
DLGAP4-AS1	CEBPZ	0.789105268
DNAJC9-AS1	CEBPZ	0.708932266
DNMBP-AS1	CEBPZ	0.74696058
DSG2-AS1	CEBPZ	0.698990802
EAF1-AS1	CEBPZ	0.894452001
EIF1B-AS1	CEBPZ	0.785870042
EVX1-AS	CEBPZ	0.978234462
FAM13A-AS1	CEBPZ	0.897778848
FLNB-AS1	CEBPZ	0.802643099
GLYCTK-AS1	CEBPZ	0.707322002
GRTP1-AS1	CEBPZ	0.960182826
GTF3C2-AS1	CEBPZ	0.737174757
HAGLROS	CEBPZ	0.91436584
IDH1-AS1	CEBPZ	0.982642035
IDI2-AS1	CEBPZ	0.820792644
IGBP1-AS2	CEBPZ	0.755944574
IQCH-AS1	CEBPZ	0.717204613
ITGA9-AS1	CEBPZ	-0.879092708
KDM4A-AS1	CEBPZ	0.726532293
LINC00237	CEBPZ	-0.731294864
LINC00620	CEBPZ	-0.729926364
LINC00649	CEBPZ	0.733986798
LINC00890	CEBPZ	0.851201839
LINC00959	CEBPZ	-0.745609285
LINC01091	CEBPZ	-0.765799913
LINC01224	CEBPZ	-0.72433094
lnc-A1BG-3	CEBPZ	0.700094245
lnc-AARS-1	CEBPZ	0.898649962
lnc-ABCA5-7	CEBPZ	0.908052333
lnc-ABCC4-1	CEBPZ	0.716630152
lnc-ABCD3-1	CEBPZ	-0.769878493
lnc-ABHD12B-1	CEBPZ	0.917065126
lnc-ABHD12B-4	CEBPZ	0.708586848
lnc-ABHD4-1	CEBPZ	0.696719078
lnc-AC002553.1-1	CEBPZ	0.988642726
lnc-AC006050.2.1-6	CEBPZ	0.982036674
lnc-AC007390.5.1-4	CEBPZ	0.898085589
lnc-AC008073.6.1-2	CEBPZ	0.941919097
lnc-AC010336.2-1	CEBPZ	0.943441112
lnc-AC010872.2.1-2	CEBPZ	-0.693195298
lnc-AC018816.3.1-11	CEBPZ	0.959700096
lnc-AC018816.3.1-9	CEBPZ	0.905224268
lnc-AC020907.3-2	CEBPZ	0.701115593
lnc-AC079341.1-10	CEBPZ	0.97512324
lnc-AC091132.1-3	CEBPZ	0.816649034
lnc-AC092295.7.1-2	CEBPZ	0.839207487
lnc-AC114947.1.1-1	CEBPZ	0.846419284
lnc-AC115618.1-1	CEBPZ	0.69412312
lnc-AC127496.3-6	CEBPZ	0.751624985
lnc-AC127496.3-7	CEBPZ	0.960115027
lnc-ACSBG1-4	CEBPZ	0.912842459
lnc-ACVR2B-1	CEBPZ	0.758207379
lnc-ADAMTS18-1	CEBPZ	0.916581745
lnc-ADAMTS18-3	CEBPZ	0.870800337
lnc-AF127577.1-3	CEBPZ	0.898652218
lnc-AF131216.6.1-2	CEBPZ	0.758898043
lnc-AFM-3	CEBPZ	0.891934403
lnc-AGGF1-1	CEBPZ	0.722386544
lnc-AGMAT-4	CEBPZ	0.989851602
lnc-AGPS-3	CEBPZ	0.846400244
lnc-AGRP-7	CEBPZ	-0.692044682
lnc-AHSA2-5	CEBPZ	0.829708365
lnc-AIDA-1	CEBPZ	0.93438291
lnc-AIDA-2	CEBPZ	0.806429721
lnc-AL136219.1-3	CEBPZ	0.764292178
lnc-AL590867.1-4	CEBPZ	0.750096145
lnc-AL901608.1-17	CEBPZ	-0.738823164
lnc-AL901608.1-3	CEBPZ	-0.732689859
lnc-ALG3-3	CEBPZ	0.867961478
lnc-ALPK1-2	CEBPZ	0.738979228
lnc-ALPK2-6	CEBPZ	0.897490659
lnc-ALX4-5	CEBPZ	0.986802684
lnc-ALX4-7	CEBPZ	0.702617847
lnc-AMDHD1-2	CEBPZ	0.965123281
lnc-AMDHD1-3	CEBPZ	0.990249977
lnc-AMDHD1-4	CEBPZ	0.895789677
lnc-AMDHD2-2	CEBPZ	0.793182511
lnc-AMELY-10	CEBPZ	0.7143833
lnc-AMFR-2	CEBPZ	0.702306068
lnc-AMN-1	CEBPZ	0.738131877
lnc-ANGPT2-2	CEBPZ	0.89722323
lnc-ANGPTL2-1	CEBPZ	0.891709737
lnc-ANKMY2-1	CEBPZ	0.981361295
lnc-ANKRD20A2-14	CEBPZ	0.879093115
lnc-ANKRD27-6	CEBPZ	0.841897076
lnc-ANKS6-1	CEBPZ	0.951966263
lnc-AP002414.1.1-1	CEBPZ	0.752545317
lnc-AP005482.1.1-2	CEBPZ	0.793892973
lnc-AP1S2-1	CEBPZ	0.978075265
lnc-AP3S1-1	CEBPZ	0.919763029
lnc-AP3S1-15	CEBPZ	0.98000973
lnc-AP3S1-4	CEBPZ	0.835884115
lnc-AP3S1-9	CEBPZ	0.701470824
lnc-AP4E1-1	CEBPZ	0.85566612
lnc-APC-4	CEBPZ	0.978082022
lnc-APITD1-CORT-1	CEBPZ	0.889879035
lnc-AQP8-1	CEBPZ	0.717664817
lnc-ARF1-1	CEBPZ	0.699004211
lnc-ARHGAP17-9	CEBPZ	0.688093997
lnc-ARHGAP28-7	CEBPZ	0.8294192
lnc-ARHGAP32-4	CEBPZ	0.791385692
lnc-ARHGEF26-3	CEBPZ	0.856978133
lnc-ARHGEF38-1	CEBPZ	0.694636437
lnc-ARHGEF40-1	CEBPZ	0.748968686
lnc-ARID5A-2	CEBPZ	0.932477212
lnc-ARL1-3	CEBPZ	0.97286661
lnc-ARL13A-1	CEBPZ	0.70449558
lnc-ARL4C-2	CEBPZ	0.78701101
lnc-ARL4D-1	CEBPZ	0.931711528
lnc-ARMC2-1	CEBPZ	0.895165319
lnc-ARPC4-3	CEBPZ	0.70133291
lnc-ARRDC1-1	CEBPZ	0.710343806
lnc-ARVCF-4	CEBPZ	0.720060821
lnc-ASB5-1	CEBPZ	0.806728869
lnc-ASCC2-1	CEBPZ	0.975042811
lnc-ASH2L-1	CEBPZ	0.702279967
lnc-ASPRV1-2	CEBPZ	0.765293117
lnc-ATG10-6	CEBPZ	0.726245621
lnc-ATG12-5	CEBPZ	0.72817832
lnc-ATG13-1	CEBPZ	0.704495995
lnc-ATM-1	CEBPZ	0.980685045
lnc-ATM-2	CEBPZ	0.821114422
lnc-ATP11B-6	CEBPZ	0.872969467
lnc-ATP5F1-2	CEBPZ	0.702308124
lnc-ATP6V1C2-2	CEBPZ	0.988387859
lnc-ATP6V1C2-4	CEBPZ	0.907082512
lnc-ATP6V1G3-4	CEBPZ	-0.833622757
lnc-B4GALT7-1	CEBPZ	0.899797903
lnc-B9D1-1	CEBPZ	0.947690273
lnc-BASP1-1	CEBPZ	0.816492231
lnc-BCL2L13-3	CEBPZ	0.862237459
lnc-BCL6-9	CEBPZ	0.90231875
lnc-BEAN1-1	CEBPZ	0.839665042
lnc-BIRC8-3	CEBPZ	0.79695041
lnc-BLCAP-1	CEBPZ	-0.748293214
lnc-BLNK-4	CEBPZ	0.763521676
lnc-BRAT1-2	CEBPZ	0.761082335
lnc-BRD7-3	CEBPZ	0.774663287
lnc-BRI3-1	CEBPZ	0.874035148
lnc-BRMS1L-7	CEBPZ	0.910621755
lnc-BTBD6-1	CEBPZ	0.686460861
lnc-BTD-1	CEBPZ	0.894135258
lnc-C11orf41-1	CEBPZ	0.686469484
lnc-C11orf49-3	CEBPZ	0.916942755
lnc-C12orf40-3	CEBPZ	0.712458654
lnc-C12orf60-2	CEBPZ	-0.699476762
lnc-C12orf66-1	CEBPZ	0.73021584
lnc-C12orf66-2	CEBPZ	0.707296309
lnc-C14orf102-1	CEBPZ	0.892333756
lnc-C14orf28-2	CEBPZ	0.887279815
lnc-C15orf44-1	CEBPZ	0.691006766
lnc-C15orf48-1	CEBPZ	0.715862187
lnc-C16orf58-5	CEBPZ	0.748084641
lnc-C16orf61-1	CEBPZ	0.801736552
lnc-C17orf101-3	CEBPZ	-0.778374376
lnc-C17orf104-1	CEBPZ	0.778083287
lnc-C17orf48-1	CEBPZ	0.98402558
lnc-C17orf80-6	CEBPZ	0.699816062
lnc-C17orf97-5	CEBPZ	0.692795025
lnc-C18orf42-3	CEBPZ	0.918767846
lnc-C19orf10-1	CEBPZ	0.700994897
lnc-C19orf44-5	CEBPZ	0.705386937
lnc-C19orf6-3	CEBPZ	0.750905743
lnc-C19orf6-5	CEBPZ	0.697802819
lnc-C1orf106-1	CEBPZ	-0.934909945
lnc-C1orf112-3	CEBPZ	0.919779356
lnc-C1orf122-1	CEBPZ	0.899030786
lnc-C1orf201-3	CEBPZ	0.877651148
lnc-C1orf43-4	CEBPZ	0.865172688
lnc-C1orf56-1	CEBPZ	0.774849256
lnc-C1QBP-1	CEBPZ	0.717858441
lnc-C1QL3-1	CEBPZ	0.941174222
lnc-C1QTNF5-1	CEBPZ	0.736267678
lnc-C1S-1	CEBPZ	0.95322953
lnc-C20orf187-1	CEBPZ	-0.934643918
lnc-C22orf26-1	CEBPZ	0.713429548
lnc-C2orf40-8	CEBPZ	0.783976475
lnc-C2orf89-2	CEBPZ	0.918984468
lnc-C3orf17-2	CEBPZ	0.906771786
lnc-C3orf23-2	CEBPZ	0.690613843
lnc-C3orf24-1	CEBPZ	0.946021839
lnc-C4orf21-1	CEBPZ	0.977070189
lnc-C5orf25-1	CEBPZ	0.827750087
lnc-C5orf27-4	CEBPZ	0.777709993
lnc-C5orf32-3	CEBPZ	0.893373423
lnc-C5orf35-1	CEBPZ	0.710666432
lnc-C5orf35-3	CEBPZ	0.989467801
lnc-C5orf39-1	CEBPZ	0.750976183
lnc-C5orf39-3	CEBPZ	0.954799193
lnc-C5orf45-1	CEBPZ	0.8825907
lnc-C5orf63-2	CEBPZ	0.691480133
lnc-C6orf105-5	CEBPZ	0.807213724
lnc-C6orf108-1	CEBPZ	0.757370961
lnc-C6orf112-8	CEBPZ	0.878364045
lnc-C6orf146-4	CEBPZ	0.781251492
lnc-C6orf195-14	CEBPZ	0.699077639
lnc-C7orf71-4	CEBPZ	0.883116413
lnc-C8orf42-4	CEBPZ	0.933459111
lnc-C8orf56-3	CEBPZ	0.851436033
lnc-C9orf103-7	CEBPZ	0.92018796
lnc-C9orf152-5	CEBPZ	0.846450125
lnc-C9orf3-6	CEBPZ	0.979593683
lnc-C9orf43-1	CEBPZ	0.844756632
lnc-C9orf57-3	CEBPZ	0.99065521
lnc-C9orf66-7	CEBPZ	0.726141675
lnc-CAPN13-1	CEBPZ	0.944087656
lnc-CAPN2-2	CEBPZ	0.895747052
lnc-CBR1-1	CEBPZ	0.932116346
lnc-CBY3-3	CEBPZ	0.942851564
lnc-CCDC125-22	CEBPZ	0.905328129
lnc-CCDC148-1	CEBPZ	0.989995944
lnc-CCDC152-2	CEBPZ	0.923228917
lnc-CCDC68-1	CEBPZ	0.866556907
lnc-CCDC7-2	CEBPZ	0.707567964
lnc-CCDC70-2	CEBPZ	0.847516892
lnc-CCDC83-1	CEBPZ	0.863589642
lnc-CCDC85C-2	CEBPZ	0.758095857
lnc-CCL27-1	CEBPZ	0.8801238
lnc-CCM2-2	CEBPZ	0.82657547
lnc-CCNB1IP1-2	CEBPZ	0.871201878
lnc-CCNI-3	CEBPZ	0.698794939
lnc-CCRN4L-14	CEBPZ	0.772419359
lnc-CD151-2	CEBPZ	0.898209288
lnc-CD37-1	CEBPZ	0.708606573
lnc-CD47-7	CEBPZ	0.720137715
lnc-CD53-2	CEBPZ	0.920624946
lnc-CDC42SE1-1	CEBPZ	0.724799374
lnc-CDH18-7	CEBPZ	-0.700878888
lnc-CDIPT-1	CEBPZ	0.709413007
lnc-CDK1-3	CEBPZ	0.83433117
lnc-CDK12-2	CEBPZ	0.918263743
lnc-CDK20-12	CEBPZ	0.837613962
lnc-CDKL1-1	CEBPZ	0.956301193
lnc-CELF3-2	CEBPZ	0.854859265
lnc-CEMP1-10	CEBPZ	0.870687817
lnc-CHAC1-4	CEBPZ	0.993409785
lnc-CHADL-3	CEBPZ	0.913396584
lnc-CHMP4C-1	CEBPZ	0.89742168
lnc-CHMP4C-2	CEBPZ	0.709615348
lnc-CHRNA3-5	CEBPZ	0.991927802
lnc-CHRNA9-2	CEBPZ	0.992892207
lnc-CHST7-2	CEBPZ	0.747200007
lnc-CHSY1-6	CEBPZ	0.900800106
lnc-CIB3-1	CEBPZ	0.706862407
lnc-CKAP4-1	CEBPZ	0.861844802
lnc-CLDN15-2	CEBPZ	0.706668829
lnc-CLRN2-1	CEBPZ	0.820870066
lnc-CMBL-5	CEBPZ	0.724981352
lnc-CNDP1-1	CEBPZ	0.885098942
lnc-CNIH3-2	CEBPZ	-0.864193269
lnc-COG3-2	CEBPZ	0.787187881
lnc-COIL-2	CEBPZ	0.827449515
lnc-COMMD1-1	CEBPZ	0.740725091
lnc-COQ9-1	CEBPZ	0.927000918
lnc-COTL1-2	CEBPZ	0.760630261
lnc-CPLX1-2	CEBPZ	0.853076296
lnc-CPLX1-3	CEBPZ	0.859759528
lnc-CPM-1	CEBPZ	0.851619778
lnc-CPM-2	CEBPZ	0.988417882
lnc-CPM-3	CEBPZ	0.924957772
lnc-CPT2-3	CEBPZ	0.794145105
lnc-CREG1-2	CEBPZ	0.967217889
lnc-CREM-6	CEBPZ	0.839377631
lnc-CRHR1-5	CEBPZ	0.834241593
lnc-CRHR1-6	CEBPZ	0.940662547
lnc-CROCC-2	CEBPZ	0.750478378
lnc-CS-1	CEBPZ	0.702562216
lnc-CSMD1-18	CEBPZ	0.711331932
lnc-CSNK1A1-7	CEBPZ	0.97734108
lnc-CTD-2368P22.1.1-2	CEBPZ	0.702310261
lnc-CTNS-1	CEBPZ	0.86712633
lnc-CTRB1-2	CEBPZ	0.907230163
lnc-CTSZ-7	CEBPZ	0.880235999
lnc-CTU2-2	CEBPZ	0.689709863
lnc-CXADR-1	CEBPZ	0.772207866
lnc-CXorf58-2	CEBPZ	0.721833896
lnc-CYB561-5	CEBPZ	0.716248976
lnc-CYB5D2-2	CEBPZ	0.969245792
lnc-CYB5R2-3	CEBPZ	-0.961413813
lnc-CYB5R2-5	CEBPZ	0.807822164
lnc-CYFIP1-3	CEBPZ	0.898057723
lnc-CYS1-5	CEBPZ	0.880762983
lnc-DALRD3-1	CEBPZ	0.916803334
lnc-DBNDD1-1	CEBPZ	0.862611177
lnc-DCAF10-1	CEBPZ	0.688519632
lnc-DCAF6-1	CEBPZ	0.725288756
lnc-DDX19B-2	CEBPZ	0.840917059
lnc-DDX27-3	CEBPZ	0.927055091
lnc-DDX51-2	CEBPZ	0.736871925
lnc-DDX54-1	CEBPZ	0.692962117
lnc-DENND2D-1	CEBPZ	0.703794119
lnc-DHX57-1	CEBPZ	0.7124089
lnc-DKK4-5	CEBPZ	0.843534049
lnc-DLEU7-5	CEBPZ	0.984106804
lnc-DLX2-3	CEBPZ	0.76224345
lnc-DNAJA1-1	CEBPZ	0.988441031
lnc-DNAJA4-1	CEBPZ	0.867905769
lnc-DNASE1L1-1	CEBPZ	0.712233283
lnc-DNASE1L2-1	CEBPZ	0.937133688
lnc-DONSON-1	CEBPZ	0.765633739
lnc-DPCD-3	CEBPZ	0.859417217
lnc-DPP4-2	CEBPZ	0.814523193
lnc-DR1-1	CEBPZ	0.753707096
lnc-DSCC1-1	CEBPZ	0.868761903
lnc-DUPD1-2	CEBPZ	0.736406195
lnc-DUSP11-3	CEBPZ	0.715956679
lnc-DUSP11-4	CEBPZ	0.865755546
lnc-DUSP14-4	CEBPZ	0.803354211
lnc-DUSP14-5	CEBPZ	0.687143136
lnc-DUXA-1	CEBPZ	0.735400085
lnc-DUXA-3	CEBPZ	0.755291245
lnc-DYNC1I1-5	CEBPZ	0.911049453
lnc-DYSF-12	CEBPZ	0.986298278
lnc-EAF2-3	CEBPZ	0.726786635
lnc-EBNA1BP2-1	CEBPZ	0.894700295
lnc-ECHDC2-1	CEBPZ	0.726478757
lnc-ECHDC3-1	CEBPZ	0.747674996
lnc-EDC3-5	CEBPZ	0.707016467
lnc-EEF1A1-1	CEBPZ	0.908649502
lnc-EEF1B2-2	CEBPZ	0.970588287
lnc-EEF1B2-3	CEBPZ	0.911173444
lnc-EFEMP1-8	CEBPZ	0.701303974
lnc-EGR4-2	CEBPZ	0.886032867
lnc-EIF2B1-3	CEBPZ	0.725565953
lnc-EPOR-2	CEBPZ	0.970576023
lnc-ERAL1-3	CEBPZ	0.806409831
lnc-ERICH1-9	CEBPZ	-0.784235661
lnc-ERP44-1	CEBPZ	0.837375831
lnc-ESD-1	CEBPZ	0.970362919
lnc-ETNK2-7	CEBPZ	0.918854339
lnc-EXOC3-3	CEBPZ	0.747404202
lnc-EXOSC6-2	CEBPZ	0.845846206
lnc-FAAH2-6	CEBPZ	0.722800113
lnc-FABP3-1	CEBPZ	0.994904663
lnc-FABP3-3	CEBPZ	0.896594793
lnc-FAM102B-2	CEBPZ	0.912362065
lnc-FAM117A-1	CEBPZ	0.697311421
lnc-FAM120B-3	CEBPZ	-0.697188732
lnc-FAM161B-2	CEBPZ	0.875773357
lnc-FAM162A-2	CEBPZ	0.897022576
lnc-FAM164C-2	CEBPZ	0.925366157
lnc-FAM183A-3	CEBPZ	0.934856862
lnc-FAM196A-1	CEBPZ	0.749465111
lnc-FAM198B-1	CEBPZ	0.96158535
lnc-FAM210A-2	CEBPZ	0.798344052
lnc-FAM43A-2	CEBPZ	0.892268009
lnc-FAM59B-3	CEBPZ	0.762802257
lnc-FAM72B-2	CEBPZ	0.841487989
lnc-FAM78A-1	CEBPZ	0.771392748
lnc-FAM78A-3	CEBPZ	0.721793255
lnc-FAM82A1-10	CEBPZ	0.915967717
lnc-FAM96B-3	CEBPZ	0.981313145
lnc-FAT2-1	CEBPZ	0.918955971
lnc-FBXL22-1	CEBPZ	0.702468147
lnc-FBXO45-3	CEBPZ	0.748009344
lnc-FBXO47-1	CEBPZ	0.717800802
lnc-FBXW8-2	CEBPZ	0.706038869
lnc-FDFT1-1	CEBPZ	0.786006977
lnc-FEM1A-4	CEBPZ	0.876646337
lnc-FGFBP1-1	CEBPZ	0.740550729
lnc-FGFR1OP2-1	CEBPZ	0.824634002
lnc-FIGNL1-1	CEBPZ	0.755013554
lnc-FKBP2-1	CEBPZ	0.919464826
lnc-FKRP-1	CEBPZ	0.743515431
lnc-FMN1-2	CEBPZ	-0.938078827
lnc-FOXM1-1	CEBPZ	0.972438924
lnc-FOXN1-1	CEBPZ	0.890855744
lnc-FREM3-6	CEBPZ	0.699007534
lnc-FSCN2-3	CEBPZ	0.708604507
lnc-FTSJ3-1	CEBPZ	0.900526145
lnc-G3BP2-1	CEBPZ	0.703165271
lnc-GADD45A-2	CEBPZ	0.930835806
lnc-GAMT-7	CEBPZ	0.970468214
lnc-GARS-2	CEBPZ	0.733639681
lnc-GCC1-1	CEBPZ	0.74421421
lnc-GCC2-1	CEBPZ	0.913974122
lnc-GGCT-1	CEBPZ	-0.839012627
lnc-GINS1-4	CEBPZ	0.708007937
lnc-GIP-5	CEBPZ	0.920182598
lnc-GJA4-1	CEBPZ	0.701342324
lnc-GJA4-2	CEBPZ	0.867186882
lnc-GK-3	CEBPZ	0.970663563
lnc-GLCCI1-1	CEBPZ	0.726193444
lnc-GLDN-3	CEBPZ	0.882992372
lnc-GLIPR1L1-2	CEBPZ	0.857015616
lnc-GLRX2-1	CEBPZ	0.982983362
lnc-GMDS-1	CEBPZ	0.705081443
lnc-GNG13-5	CEBPZ	-0.694575419
lnc-GNS-3	CEBPZ	0.910399942
lnc-GOSR2-2	CEBPZ	0.765909311
lnc-GPLD1-1	CEBPZ	0.984467861
lnc-GPR160-1	CEBPZ	0.996924175
lnc-GPR27-5	CEBPZ	0.962045142
lnc-GPR98-8	CEBPZ	0.770693146
lnc-GPRC5D-1	CEBPZ	0.968058341
lnc-GPRC5D-3	CEBPZ	0.750693977
lnc-GPS1-1	CEBPZ	0.689080233
lnc-GRHL2-14	CEBPZ	0.864557115
lnc-GRID2IP-1	CEBPZ	0.71315836
lnc-GSG1L-1	CEBPZ	0.702284622
lnc-GSTO2-4	CEBPZ	0.712955406
lnc-GTF2E2-2	CEBPZ	0.914000408
lnc-GTPBP1-1	CEBPZ	0.903783886
lnc-GTPBP1-2	CEBPZ	0.719685919
lnc-GUCY1A3-3	CEBPZ	-0.686368582
lnc-H2AFY2-1	CEBPZ	0.93356191
lnc-H3F3C-4	CEBPZ	0.796852684
lnc-HABP4-4	CEBPZ	0.926518616
lnc-HAND1-3	CEBPZ	0.696185111
lnc-HBG2-1	CEBPZ	0.761190729
lnc-HCN3-1	CEBPZ	0.92405922
lnc-HCN4-2	CEBPZ	0.709990086
lnc-HDLBP-2	CEBPZ	0.831465286
lnc-HDLBP-3	CEBPZ	0.962998774
lnc-HELZ-2	CEBPZ	0.924118049
lnc-HMBOX1-8	CEBPZ	0.989595261
lnc-HMGA1-2	CEBPZ	0.700237669
lnc-HMGB2-1	CEBPZ	0.763396411
lnc-HMGB2-3	CEBPZ	0.690770608
lnc-HPCAL1-2	CEBPZ	0.850473448
lnc-HSP90AA1-1	CEBPZ	0.92874624
lnc-HSPG2-1	CEBPZ	0.873213977
lnc-IARS2-2	CEBPZ	0.931140917
lnc-ID2-1	CEBPZ	0.953197339
lnc-ID4-2	CEBPZ	0.871526709
lnc-IFNG-3	CEBPZ	0.832680989
lnc-IFT46-1	CEBPZ	0.768875274
lnc-IGFBP7-1	CEBPZ	0.898388502
lnc-IGFL3-3	CEBPZ	-0.69696355
lnc-IKBIP-1	CEBPZ	0.943780785
lnc-IKZF1-2	CEBPZ	0.814778877
lnc-IKZF2-9	CEBPZ	0.973695454
lnc-IL12RB1-2	CEBPZ	0.942309968
lnc-IL23A-2	CEBPZ	0.713828387
lnc-IL2RG-4	CEBPZ	0.899909893
lnc-IL31RA-1	CEBPZ	0.914877713
lnc-IL6-3	CEBPZ	0.767839965
lnc-ILK-1	CEBPZ	0.798476256
lnc-ILKAP-4	CEBPZ	0.878792291
lnc-ING1-3	CEBPZ	0.9924027
lnc-INPPL1-1	CEBPZ	0.959788149
lnc-INTS12-1	CEBPZ	0.975192032
lnc-INTS12-2	CEBPZ	0.946160682
lnc-INTS4-1	CEBPZ	0.715720669
lnc-IQCG-2	CEBPZ	0.976947941
lnc-IQCG-6	CEBPZ	0.717783135
lnc-IRAK4-2	CEBPZ	0.924274486
lnc-IRF1-4	CEBPZ	0.951612388
lnc-IRF4-6	CEBPZ	0.842965655
lnc-IRGM-1	CEBPZ	0.824593781
lnc-ITGB3BP-5	CEBPZ	0.756057681
lnc-ITIH3-4	CEBPZ	0.714437586
lnc-ITPR2-2	CEBPZ	0.777389412
lnc-JAG1-1	CEBPZ	0.706481416
lnc-JAG1-6	CEBPZ	0.805279818
lnc-JUNB-2	CEBPZ	0.788518479
lnc-KANK3-3	CEBPZ	0.833238712
lnc-KAT8-2	CEBPZ	0.89794273
lnc-KATNAL2-5	CEBPZ	0.98664778
lnc-KAZALD1-1	CEBPZ	0.750410013
lnc-KB-1980E6.3.1-6	CEBPZ	0.881066093
lnc-KBTBD3-1	CEBPZ	0.901502306
lnc-KCNH5-3	CEBPZ	0.960876327
lnc-KCNJ12-4	CEBPZ	0.720638146
lnc-KCNJ13-1	CEBPZ	0.745829442
lnc-KCNS3-11	CEBPZ	0.703723277
lnc-KCNT1-2	CEBPZ	0.954239742
lnc-KCNT1-7	CEBPZ	0.739962907
lnc-KCTD18-1	CEBPZ	0.746136461
lnc-KCTD4-1	CEBPZ	0.964990381
lnc-KDM3A-1	CEBPZ	0.872486734
lnc-KIAA0020-7	CEBPZ	0.944224661
lnc-KIAA0087-2	CEBPZ	0.706359103
lnc-KIAA0125-2	CEBPZ	-0.699328791
lnc-KIAA0196-5	CEBPZ	0.958253677
lnc-KIAA0319-1	CEBPZ	0.804451735
lnc-KIAA0564-2	CEBPZ	0.795901097
lnc-KIAA0664-2	CEBPZ	0.779138547
lnc-KIAA1147-1	CEBPZ	0.689925512
lnc-KIAA1429-6	CEBPZ	0.912174175
lnc-KIAA1609-1	CEBPZ	0.876889396
lnc-KIAA1644-1	CEBPZ	-0.686452331
lnc-KIAA1731-1	CEBPZ	0.979891991
lnc-KIAA1919-8	CEBPZ	0.694345735
lnc-KLHDC10-2	CEBPZ	0.719997193
lnc-KLHL20-1	CEBPZ	0.701196572
lnc-KLHL22-2	CEBPZ	0.70404162
lnc-KLHL25-12	CEBPZ	0.87608694
lnc-KLHL25-6	CEBPZ	0.980491057
lnc-KRBA1-2	CEBPZ	0.865703483
lnc-KRT80-10	CEBPZ	0.968621552
lnc-LAT2-2	CEBPZ	0.905839349
lnc-LEO1-2	CEBPZ	0.789454582
lnc-LEO1-4	CEBPZ	0.879876856
lnc-LEPRE1-1	CEBPZ	0.956803085
lnc-LETM2-5	CEBPZ	0.982047826
lnc-LIPG-2	CEBPZ	0.963010693
lnc-LMAN2-1	CEBPZ	0.697991351
lnc-LMTK3-1	CEBPZ	0.738331959
lnc-LOH12CR1-1	CEBPZ	0.868666446
lnc-LOXL1-1	CEBPZ	0.804667288
lnc-LPIN2-1	CEBPZ	0.901229988
lnc-LRRC1-5	CEBPZ	0.853349024
lnc-LRRC38-2	CEBPZ	0.981979017
lnc-LRRC57-1	CEBPZ	0.893756464
lnc-LRRFIP2-1	CEBPZ	0.897581954
lnc-LRRN4-2	CEBPZ	0.877873423
lnc-LSG1-4	CEBPZ	0.849735574
lnc-LSM5-2	CEBPZ	0.999713294
lnc-LSS-1	CEBPZ	0.961269212
lnc-LTBR-6	CEBPZ	0.889050582
lnc-LUZP1-3	CEBPZ	0.832651202
lnc-LXN-1	CEBPZ	0.915176602
lnc-LYRM2-1	CEBPZ	0.698724286
lnc-LYRM2-2	CEBPZ	0.701194653
lnc-LYZL1-10	CEBPZ	0.722324409
lnc-MACC1-1	CEBPZ	0.954443002
lnc-MAFF-2	CEBPZ	0.714941569
lnc-MAFF-6	CEBPZ	0.76282565
lnc-MANSC4-2	CEBPZ	0.991995294
lnc-MAP1LC3B-9	CEBPZ	0.790391058
lnc-MAP4K3-2	CEBPZ	0.830238638
lnc-MAP6-1	CEBPZ	0.969841518
lnc-MAPK6-5	CEBPZ	0.938146801
lnc-MAPK6-8	CEBPZ	0.834152538
lnc-MAPK6-9	CEBPZ	0.727146459
lnc-MARCH10-1	CEBPZ	0.724806464
lnc-MARCH4-1	CEBPZ	0.958691854
lnc-MATN2-1	CEBPZ	0.728164064
lnc-MBOAT1-13	CEBPZ	0.734869594
lnc-MDM4-8	CEBPZ	0.962238957
lnc-MDS2-1	CEBPZ	-0.690536411
lnc-MEP1B-2	CEBPZ	0.743356318
lnc-MEST-2	CEBPZ	0.971534472
lnc-METRNL-1	CEBPZ	-0.696094989
lnc-MFN1-1	CEBPZ	0.742229202
lnc-MFSD2A-1	CEBPZ	0.937435432
lnc-MFSD4-1	CEBPZ	0.816144469
lnc-MFSD9-4	CEBPZ	0.923033036
lnc-MGLL-5	CEBPZ	0.688604029
lnc-MINA-9	CEBPZ	0.694645936
lnc-MIXL1-2	CEBPZ	0.975711687
lnc-MKI67IP-8	CEBPZ	0.695038974
lnc-MKLN1-1	CEBPZ	0.830929172
lnc-MLLT10-5	CEBPZ	-0.701500976
lnc-MLST8-1	CEBPZ	0.8887569
lnc-MLX-3	CEBPZ	0.708986319
lnc-MMP15-1	CEBPZ	0.913316692
lnc-MMP23B-1	CEBPZ	0.730324266
lnc-MMP23B-3	CEBPZ	0.971355583
lnc-MOCS2-3	CEBPZ	0.984151731
lnc-MORC2-1	CEBPZ	0.870513758
lnc-MORC2-2	CEBPZ	0.739455263
lnc-MPEG1-2	CEBPZ	0.97946014
lnc-MPHOSPH10-2	CEBPZ	0.980501645
lnc-MPI-1	CEBPZ	0.990983999
lnc-MPP7-8	CEBPZ	-0.888850031
lnc-MPPE1-3	CEBPZ	0.702985577
lnc-MRC2-1	CEBPZ	0.892212299
lnc-MRP63-6	CEBPZ	0.729571906
lnc-MRPL39-20	CEBPZ	0.853422861
lnc-MRPL40-4	CEBPZ	0.807870347
lnc-MRPL47-2	CEBPZ	0.988748023
lnc-MRPS11-2	CEBPZ	0.784786858
lnc-MRPS16-1	CEBPZ	0.794485821
lnc-MRPS24-2	CEBPZ	0.796443813
lnc-MRTO4-2	CEBPZ	0.925087671
lnc-MSI2-5	CEBPZ	0.883938799
lnc-MTIF3-2	CEBPZ	0.855657881
lnc-MTMR2-2	CEBPZ	0.917415807
lnc-MTO1-1	CEBPZ	0.808666555
lnc-MTRR-7	CEBPZ	0.707496244
lnc-MUC20-10	CEBPZ	0.903132038
lnc-MUTYH-1	CEBPZ	0.713902498
lnc-MYL12A-1	CEBPZ	0.977861099
lnc-MYL4-1	CEBPZ	0.916545188
lnc-MYL6-2	CEBPZ	0.861873343
lnc-MYOM1-1	CEBPZ	0.761483284
lnc-MZT2B-1	CEBPZ	0.887391844
lnc-NAA11-1	CEBPZ	0.718089403
lnc-NAA50-1	CEBPZ	0.992478662
lnc-NAA50-3	CEBPZ	0.876310262
lnc-NAA60-1	CEBPZ	0.725515291
lnc-NAB2-1	CEBPZ	-0.776757287
lnc-NBAS-15	CEBPZ	0.792658243
lnc-NBPF15-2	CEBPZ	0.78917933
lnc-NCOA3-9	CEBPZ	-0.792517221
lnc-NDE1-3	CEBPZ	0.92891483
lnc-NDFIP2-13	CEBPZ	0.811132958
lnc-NDUFAF2-1	CEBPZ	0.918777327
lnc-NDUFAF2-2	CEBPZ	0.755231532
lnc-NDUFAF3-1	CEBPZ	0.951898469
lnc-NDUFB3-3	CEBPZ	0.713041916
lnc-NDUFB9-1	CEBPZ	0.716652609
lnc-NDUFS1-2	CEBPZ	0.714231812
lnc-NDUFS6-15	CEBPZ	0.725944757
lnc-NDUFS6-16	CEBPZ	0.690437246
lnc-NDUFS6-17	CEBPZ	0.976200624
lnc-NDUFV1-6	CEBPZ	0.900117635
lnc-NEK5-1	CEBPZ	0.971811709
lnc-NFAT5-1	CEBPZ	0.971351644
lnc-NFKBIB-5	CEBPZ	0.990145352
lnc-NID2-5	CEBPZ	0.958163939
lnc-NIPAL1-2	CEBPZ	0.966750775
lnc-NIPBL-1	CEBPZ	0.798383835
lnc-NIT2-1	CEBPZ	0.720897618
lnc-NLRP2-2	CEBPZ	0.975711188
lnc-NLRP3-4	CEBPZ	0.900351195
lnc-NMBR-2	CEBPZ	-0.73841037
lnc-NME6-2	CEBPZ	0.725443134
lnc-NNT-3	CEBPZ	0.722852121
lnc-NNT-5	CEBPZ	0.840526338
lnc-NPAS2-2	CEBPZ	0.918571911
lnc-NPAT-2	CEBPZ	0.861719634
lnc-NPHS2-3	CEBPZ	0.846808305
lnc-NPIPL2-3	CEBPZ	0.720066034
lnc-NR2C2-1	CEBPZ	0.789725752
lnc-NRIP2-1	CEBPZ	0.724595839
lnc-NSA2-3	CEBPZ	0.710158446
lnc-NSMCE1-1	CEBPZ	0.871634305
lnc-NSUN7-1	CEBPZ	0.713360109
lnc-NTAN1-1	CEBPZ	0.713046732
lnc-NUDT16-1	CEBPZ	-0.735754618
lnc-NUDT5-1	CEBPZ	0.958399095
lnc-NUP107-1	CEBPZ	0.701691928
lnc-NXPH2-3	CEBPZ	-0.687873246
lnc-OAZ3-4	CEBPZ	-0.704610787
lnc-OAZ3-6	CEBPZ	0.920477517
lnc-ODF4-2	CEBPZ	0.693756213
lnc-ODZ1-6	CEBPZ	0.883827467
lnc-OLR1-3	CEBPZ	0.730360616
lnc-OR4F16-8	CEBPZ	0.873325266
lnc-OR4M2-12	CEBPZ	-0.718520808
lnc-OR7C2-1	CEBPZ	0.987767213
lnc-ORC3-1	CEBPZ	0.83861842
lnc-ORC3-2	CEBPZ	0.82860011
lnc-ORC4-1	CEBPZ	0.872530084
lnc-OSBPL7-1	CEBPZ	0.739278091
lnc-OSBPL9-3	CEBPZ	0.743409358
lnc-OTP-5	CEBPZ	0.971659636
lnc-OTUD6B-1	CEBPZ	0.760374632
lnc-OTUD6B-2	CEBPZ	0.968097793
lnc-OXNAD1-6	CEBPZ	0.940446758
lnc-OXSM-2	CEBPZ	0.930562205
lnc-P4HA3-1	CEBPZ	0.898879395
lnc-PABPC1L2B-2	CEBPZ	0.862489829
lnc-PADI4-2	CEBPZ	0.715087683
lnc-PAH-3	CEBPZ	-0.876858187
lnc-PAICS-2	CEBPZ	0.832563401
lnc-PAPLN-1	CEBPZ	0.876400492
lnc-PARN-10	CEBPZ	0.698537347
lnc-PARP2-1	CEBPZ	0.904714554
lnc-PCCA-2	CEBPZ	0.783272694
lnc-PCDH12-1	CEBPZ	0.981436736
lnc-PCM1-3	CEBPZ	0.960098546
lnc-PCNA-1	CEBPZ	0.704907874
lnc-PDCD4-1	CEBPZ	0.693414151
lnc-PDE8A-2	CEBPZ	-0.694290373
lnc-PDF-1	CEBPZ	0.708198796
lnc-PDGFRL-2	CEBPZ	0.98026407
lnc-PDZD7-1	CEBPZ	0.71568389
lnc-PDZD7-2	CEBPZ	0.75298754
lnc-PDZD9-1	CEBPZ	0.718425893
lnc-PEA15-1	CEBPZ	0.815173188
lnc-PEAK1.1-2	CEBPZ	0.704555319
lnc-PEAK1.1-5	CEBPZ	0.913707112
lnc-PER2-5	CEBPZ	0.76982821
lnc-PEX7-2	CEBPZ	0.746473947
lnc-PFDN4-3	CEBPZ	0.699387881
lnc-PHB2-4	CEBPZ	0.742459315
lnc-PHF10-1	CEBPZ	0.713764437
lnc-PHLDB1-1	CEBPZ	0.914814597
lnc-PHRF1-1	CEBPZ	0.873959084
lnc-PHYHIP-1	CEBPZ	0.94614753
lnc-PI4KA-2	CEBPZ	0.900238499
lnc-PIGB-2	CEBPZ	0.984574475
lnc-PIGG-2	CEBPZ	0.823552494
lnc-PIGL-1	CEBPZ	0.918575109
lnc-PIGN-1	CEBPZ	0.739565638
lnc-PIGU-3	CEBPZ	0.90458809
lnc-PIGY-5	CEBPZ	0.796235402
lnc-PINK1-2	CEBPZ	0.985681158
lnc-PKLR-1	CEBPZ	0.795222076
lnc-PLA2G2D-1	CEBPZ	0.696119552
lnc-PLAC8L1-1	CEBPZ	0.887689149
lnc-PLD3-3	CEBPZ	0.781944781
lnc-PLD6-1	CEBPZ	0.701530105
lnc-PLXND1-2	CEBPZ	0.775878952
lnc-PMEL-1	CEBPZ	0.705698759
lnc-PMM2-1	CEBPZ	0.882153171
lnc-PNLIPRP1-1	CEBPZ	0.950163342
lnc-PNMA1-1	CEBPZ	0.779816254
lnc-PNMA2-1	CEBPZ	0.986335914
lnc-PNO1-1	CEBPZ	0.960909746
lnc-POC1B-GALNT4-2	CEBPZ	0.898497994
lnc-POC5-1	CEBPZ	0.771396592
lnc-PODXL-3	CEBPZ	0.957684389
lnc-POLE4-6	CEBPZ	0.710737693
lnc-POLH-1	CEBPZ	0.914365538
lnc-POLR1E-4	CEBPZ	0.975450819
lnc-POTEB-5	CEBPZ	-0.889339825
lnc-POTEM-4	CEBPZ	0.937681875
lnc-PPAP2A-1	CEBPZ	0.923764254
lnc-PPIAL4C-9	CEBPZ	0.973311732
lnc-PPIF-1	CEBPZ	0.763486619
lnc-PPM1D-1	CEBPZ	-0.687141476
lnc-PPP1CB-1	CEBPZ	0.944151647
lnc-PPP1R14B-1	CEBPZ	0.953160893
lnc-PPP1R26-1	CEBPZ	0.879766515
lnc-PPP1R3A-4	CEBPZ	0.7061713
lnc-PPP1R3B-11	CEBPZ	0.728691201
lnc-PPP1R3G-3	CEBPZ	-0.809180461
lnc-PPP2R5B-4	CEBPZ	0.903454077
lnc-PPP4C-1	CEBPZ	0.786665023
lnc-PPP4C-8	CEBPZ	0.747955837
lnc-PPP4R1-18	CEBPZ	0.711073157
lnc-PPP4R1L-1	CEBPZ	0.750607051
lnc-PRDM14-5	CEBPZ	0.69637443
lnc-PRDM2-2	CEBPZ	0.921947054
lnc-PRDM4-4	CEBPZ	0.869074372
lnc-PRKAB2-1	CEBPZ	0.808177684
lnc-PRPF4B-5	CEBPZ	0.782523377
lnc-PRR15L-2	CEBPZ	0.761043014
lnc-PRR15L-3	CEBPZ	0.878675286
lnc-PRR15L-6	CEBPZ	0.691575939
lnc-PSMB11-1	CEBPZ	0.739769954
lnc-PSMC1-1	CEBPZ	0.859011707
lnc-PSME1-1	CEBPZ	0.723943014
lnc-PSME4-2	CEBPZ	0.893728902
lnc-PTDSS1-1	CEBPZ	0.833708819
lnc-PTEN-12	CEBPZ	0.836483288
lnc-PTGDR2-1	CEBPZ	0.971666928
lnc-PTGER4-4	CEBPZ	0.916208574
lnc-PTPLA-2	CEBPZ	0.687916896
lnc-PTPN6-1	CEBPZ	0.838278915
lnc-PTPRZ1-5	CEBPZ	0.698823817
lnc-PTTG1-6	CEBPZ	0.835666054
lnc-PUS7-2	CEBPZ	0.783161172
lnc-PXDC1-12	CEBPZ	0.870031066
lnc-PYCARD-1	CEBPZ	0.733977285
lnc-QDPR-2	CEBPZ	0.849859901
lnc-RAB17-2	CEBPZ	0.908165824
lnc-RAB3GAP2-1	CEBPZ	0.78740387
lnc-RABL2A-5	CEBPZ	0.884957332
lnc-RAD9B-1	CEBPZ	0.919822983
lnc-RAI1-1	CEBPZ	0.871519059
lnc-RALB-8	CEBPZ	0.914995923
lnc-RANBP1-1	CEBPZ	0.792495245
lnc-RAPH1-6	CEBPZ	0.913723148
lnc-RASAL1-1	CEBPZ	0.957950732
lnc-RB1-2	CEBPZ	0.90822725
lnc-RBM26-1	CEBPZ	0.84604172
lnc-RC3H1-1	CEBPZ	0.970133003
lnc-RCAN3-1	CEBPZ	0.889486006
lnc-RELL2-1	CEBPZ	0.907408238
lnc-REM2-2	CEBPZ	0.726453472
lnc-RFC2-4	CEBPZ	0.776676113
lnc-RFC4-1	CEBPZ	0.76325077
lnc-RFXAP-2	CEBPZ	0.814986259
lnc-RGS18-6	CEBPZ	0.860396319
lnc-RHOC-1	CEBPZ	0.854916778
lnc-RHOQ-1	CEBPZ	0.910037743
lnc-RHOQ-2	CEBPZ	0.905634576
lnc-RIC8A-1	CEBPZ	0.713967596
lnc-RIC8A-2	CEBPZ	0.69892598
lnc-RIMBP3C-3	CEBPZ	0.704331284
lnc-RIMS3-2	CEBPZ	0.869565323
lnc-RIMS3-3	CEBPZ	0.911406683
lnc-RIPK2-2	CEBPZ	0.847424313
lnc-RMI1-1	CEBPZ	0.788030244
lnc-RNF113B-2	CEBPZ	0.778861602
lnc-RNF121-5	CEBPZ	0.930569778
lnc-RNF125-2	CEBPZ	0.72749284
lnc-RNF139-2	CEBPZ	0.828921069
lnc-RNF146-2	CEBPZ	0.891379824
lnc-RNF149-2	CEBPZ	0.949250231
lnc-RNF166-1	CEBPZ	0.727450648
lnc-RNF24-5	CEBPZ	0.820475198
lnc-ROS1-2	CEBPZ	-0.699340098
lnc-RP11-1012A1.4.1-2	CEBPZ	0.825209123
lnc-RP11-1105G2.3.1-3	CEBPZ	0.853678305
lnc-RP11-116D17.1.1-10	CEBPZ	0.908408703
lnc-RP11-116D17.1.1-4	CEBPZ	-0.802397034
lnc-RP11-181C3.1.1-9	CEBPZ	0.797904604
lnc-RP11-210M15.2.1-6	CEBPZ	0.910172538
lnc-RP11-324D17.2.1-3	CEBPZ	-0.889223688
lnc-RP11-582J16.5.1-4	CEBPZ	0.760315009
lnc-RP11-6F2.7.1-5	CEBPZ	0.781878021
lnc-RP11-712L6.5.1-3	CEBPZ	0.87781136
lnc-RP3-486B10.1.1-4	CEBPZ	0.708628263
lnc-RPF1-1	CEBPZ	0.905229425
lnc-RPL14-2	CEBPZ	0.86545714
lnc-RPL30-1	CEBPZ	0.769103978
lnc-RPS24-8	CEBPZ	0.878783252
lnc-RPS27L-1	CEBPZ	0.960876978
lnc-RPS6-3	CEBPZ	0.733967753
lnc-RPUSD2-1	CEBPZ	0.704966763
lnc-RSPH1-3	CEBPZ	-0.706367822
lnc-RUNX1-4	CEBPZ	0.709146527
lnc-S100A13-1	CEBPZ	0.816657293
lnc-S100A7A-1	CEBPZ	-0.776486792
lnc-S1PR2-2	CEBPZ	0.751189206
lnc-SAA2-2	CEBPZ	0.814921208
lnc-SAFB-1	CEBPZ	0.687332714
lnc-SAR1B-1	CEBPZ	0.884670102
lnc-SCAND1-5	CEBPZ	0.733843336
lnc-SCARB2-1	CEBPZ	0.695705625
lnc-SCD-2	CEBPZ	0.784802715
lnc-SCGB1D4-1	CEBPZ	0.705337774
lnc-SCN2A-6	CEBPZ	0.944774736
lnc-SDCCAG8-1	CEBPZ	0.749881365
lnc-SEBOX-1	CEBPZ	0.970134072
lnc-SEC22C-2	CEBPZ	0.89815264
lnc-SEC24B-1	CEBPZ	-0.793885246
lnc-SEMA5A-10	CEBPZ	0.720395486
lnc-SEMA5B-1	CEBPZ	0.711941518
lnc-SENP6-12	CEBPZ	0.775368709
lnc-SEPT14-2	CEBPZ	0.892274824
lnc-SERAC1-3	CEBPZ	0.723999529
lnc-SERHL2-7	CEBPZ	0.920538546
lnc-SERPINB6-1	CEBPZ	0.805720471
lnc-SERPINE2-1	CEBPZ	0.893359806
lnc-SETD1B-3	CEBPZ	0.766632831
lnc-SETD5-1	CEBPZ	0.688791552
lnc-SETD8-1	CEBPZ	0.982977309
lnc-SFN-1	CEBPZ	0.70446396
lnc-SGCG-11	CEBPZ	0.744999149
lnc-SGSH-1	CEBPZ	0.878902279
lnc-SH2D3A-2	CEBPZ	0.720323784
lnc-SH2D7-3	CEBPZ	0.873168314
lnc-SH3BGRL2-9	CEBPZ	0.96617445
lnc-SH3RF1-2	CEBPZ	0.887282028
lnc-SH3RF2-1	CEBPZ	0.980228966
lnc-SHANK2-3	CEBPZ	0.958283188
lnc-SHARPIN-4	CEBPZ	0.784570011
lnc-SIAE-1	CEBPZ	0.715695463
lnc-SIK2-1	CEBPZ	0.737325006
lnc-SIVA1-1	CEBPZ	0.832096906
lnc-SKA2-2	CEBPZ	0.916667517
lnc-SKIV2L2-1	CEBPZ	0.869461051
lnc-SLA2-1	CEBPZ	0.968270257
lnc-SLC12A2-3	CEBPZ	0.750437287
lnc-SLC16A6-2	CEBPZ	0.922590695
lnc-SLC22A23-1	CEBPZ	0.763858998
lnc-SLC24A5-5	CEBPZ	0.896613539
lnc-SLC25A16-2	CEBPZ	0.703130231
lnc-SLC25A21-4	CEBPZ	0.986483204
lnc-SLC25A29-1	CEBPZ	0.943003005
lnc-SLC25A31-2	CEBPZ	0.802672157
lnc-SLC25A47-2	CEBPZ	0.788565068
lnc-SLC25A47-5	CEBPZ	0.958268697
lnc-SLC2A1-1	CEBPZ	0.718333623
lnc-SLC2A6-2	CEBPZ	0.947400912
lnc-SLC35F5-17	CEBPZ	0.806714159
lnc-SLC36A1-5	CEBPZ	0.882780789
lnc-SLC38A8-9	CEBPZ	0.931842329
lnc-SLC39A10-10	CEBPZ	0.80945274
lnc-SLC39A6-1	CEBPZ	0.910279139
lnc-SLC3A2-3	CEBPZ	0.946788429
lnc-SLC46A2-1	CEBPZ	0.983093906
lnc-SLC7A6OS-2	CEBPZ	0.710752921
lnc-SLCO2B1-2	CEBPZ	0.730620695
lnc-SLCO2B1-3	CEBPZ	0.70510334
lnc-SLTM-1	CEBPZ	0.882133001
lnc-SMARCC2-5	CEBPZ	0.763075903
lnc-SMARCC2-7	CEBPZ	0.735009838
lnc-SMCR7-2	CEBPZ	0.690854004
lnc-SMG1-2	CEBPZ	0.75994956
lnc-SNN-5	CEBPZ	0.714372608
lnc-SNRNP35-1	CEBPZ	0.911547974
lnc-SNTG2-3	CEBPZ	0.985924941
lnc-SNX20-3	CEBPZ	0.899795542
lnc-SNX20-5	CEBPZ	0.807038751
lnc-SNX33-1	CEBPZ	0.783772512
lnc-SP110-5	CEBPZ	0.981774388
lnc-SP140-3	CEBPZ	0.731377703
lnc-SPATA12-2	CEBPZ	0.950667666
lnc-SPATA21-3	CEBPZ	0.728252731
lnc-SPATA9-1	CEBPZ	0.697358027
lnc-SPERT-4	CEBPZ	0.903858273
lnc-SPG11-3	CEBPZ	0.75526121
lnc-SPIN3-5	CEBPZ	0.967296736
lnc-SPRED2-11	CEBPZ	0.755267994
lnc-SPRYD3-1	CEBPZ	0.80379573
lnc-SPTBN2-3	CEBPZ	0.755026397
lnc-SPTBN5-1	CEBPZ	0.83253523
lnc-SPTBN5-2	CEBPZ	0.902566444
lnc-SRGAP3-2	CEBPZ	0.692751253
lnc-SRPK2-7	CEBPZ	0.709673823
lnc-SRPX2-2	CEBPZ	0.85473126
lnc-SRSF5-2	CEBPZ	0.859283236
lnc-SSBP4-2	CEBPZ	0.78011321
lnc-ST3GAL1-1	CEBPZ	0.902543424
lnc-ST7L-1	CEBPZ	0.989097875
lnc-ST7L-3	CEBPZ	0.885059386
lnc-STAG3L4-5	CEBPZ	0.963644942
lnc-STAP1-12	CEBPZ	0.953213989
lnc-STARD9-1	CEBPZ	0.946378589
lnc-STAT1-1	CEBPZ	0.887130649
lnc-STS-1	CEBPZ	0.709987342
lnc-STYX-2	CEBPZ	0.803004775
lnc-SUSD1-1	CEBPZ	-0.863686158
lnc-SWSAP1-1	CEBPZ	0.795967027
lnc-SYCP1-1	CEBPZ	-0.707457107
lnc-SYNM-2	CEBPZ	0.728967576
lnc-SYT15-3	CEBPZ	0.90836778
lnc-SZT2-2	CEBPZ	0.704806615
lnc-TAF13-2	CEBPZ	0.759909389
lnc-TAF1A-1	CEBPZ	0.858844637
lnc-TAF1D-1	CEBPZ	0.900497932
lnc-TAOK3-9	CEBPZ	0.702926483
lnc-TATDN1-2	CEBPZ	0.906213843
lnc-TBL1XR1-6	CEBPZ	-0.688292773
lnc-TBP-3	CEBPZ	0.885603304
lnc-TBPL1-3	CEBPZ	0.719848778
lnc-TCHP-1	CEBPZ	0.91701495
lnc-TCP1-2	CEBPZ	0.880201082
lnc-TCP10L-3	CEBPZ	0.841727589
lnc-TCTA-1	CEBPZ	0.78347624
lnc-TESC-4	CEBPZ	0.903838851
lnc-TFB2M-1	CEBPZ	0.762832741
lnc-THBS4-1	CEBPZ	0.756203161
lnc-THRSP-2	CEBPZ	0.958000681
lnc-THSD4-4	CEBPZ	0.99424172
lnc-THUMPD2-1	CEBPZ	0.702107851
lnc-THUMPD3-4	CEBPZ	0.716044822
lnc-TICAM1-1	CEBPZ	0.912816367
lnc-TIGD1L2-6	CEBPZ	0.915702101
lnc-TIGD6-1	CEBPZ	0.769252018
lnc-TLCD1-3	CEBPZ	0.875705516
lnc-TLE2-1	CEBPZ	0.789961725
lnc-TM2D2-1	CEBPZ	0.995383729
lnc-TMC5-1	CEBPZ	0.965956772
lnc-TMEM116-1	CEBPZ	0.692970561
lnc-TMEM123-1	CEBPZ	0.849537026
lnc-TMEM138-4	CEBPZ	0.899615769
lnc-TMEM147-1	CEBPZ	0.847810461
lnc-TMEM156-1	CEBPZ	0.9652875
lnc-TMEM164-2	CEBPZ	0.836900162
lnc-TMEM180-3	CEBPZ	0.791157743
lnc-TMEM194B-6	CEBPZ	0.954816845
lnc-TMEM22-2	CEBPZ	0.954390432
lnc-TMEM27-1	CEBPZ	0.891152645
lnc-TMEM38A-2	CEBPZ	0.740088242
lnc-TMEM41B-4	CEBPZ	0.784914794
lnc-TMEM43-1	CEBPZ	0.722422186
lnc-TMEM50B-2	CEBPZ	0.957238271
lnc-TMEM50B-3	CEBPZ	0.774115845
lnc-TMEM75-8	CEBPZ	-0.964356206
lnc-TMEM85-1	CEBPZ	0.816840841
lnc-TMEM85-2	CEBPZ	0.95147573
lnc-TMPRSS2-1	CEBPZ	0.878446294
lnc-TMSB15A-3	CEBPZ	0.735628387
lnc-TMSB15A-5	CEBPZ	0.712467486
lnc-TMTC3-14	CEBPZ	0.789408718
lnc-TMUB2-1	CEBPZ	0.814854503
lnc-TNFRSF11B-2	CEBPZ	0.901713938
lnc-TNN-1	CEBPZ	0.843768623
lnc-TNNC2-1	CEBPZ	0.734119209
lnc-TNP1-4	CEBPZ	0.696587138
lnc-TOMM20L-1	CEBPZ	0.895063328
lnc-TOP1MT-5	CEBPZ	0.81179213
lnc-TOR1AIP1-1	CEBPZ	0.741110753
lnc-TOR1AIP1-2	CEBPZ	0.786936287
lnc-TOR3A-1	CEBPZ	0.948926801
lnc-TOX4-1	CEBPZ	0.725532779
lnc-TRAFD1-1	CEBPZ	0.762801951
lnc-TRAP1-1	CEBPZ	0.723819063
lnc-TRAPPC12-1	CEBPZ	0.84908614
lnc-TRAPPC4-1	CEBPZ	0.830820185
lnc-TREX1-2	CEBPZ	0.709105915
lnc-TRIAP1-2	CEBPZ	0.899249942
lnc-TRIM16-4	CEBPZ	0.810114376
lnc-TRIM69-1	CEBPZ	0.741508905
lnc-TRIP10-4	CEBPZ	0.76749597
lnc-TRMT1L-2	CEBPZ	0.832908786
lnc-TRNT1-1	CEBPZ	0.876025754
lnc-TSC1-1	CEBPZ	0.793638703
lnc-TSHZ3-2	CEBPZ	0.864911342
lnc-TSKS-1	CEBPZ	0.703298326
lnc-TSN-4	CEBPZ	0.703588022
lnc-TSPYL4-1	CEBPZ	0.996065786
lnc-TTC23-5	CEBPZ	-0.716822894
lnc-TTC26-4	CEBPZ	0.832784271
lnc-TTC26-5	CEBPZ	0.699705896
lnc-TUBA1C-3	CEBPZ	0.776449554
lnc-TUBGCP4-1	CEBPZ	0.980512991
lnc-TUBGCP6-5	CEBPZ	0.976765143
lnc-TUFM-1	CEBPZ	0.769326196
lnc-TUSC5-5	CEBPZ	0.897741946
lnc-TYW1-1	CEBPZ	0.779379545
lnc-UBE2B-1	CEBPZ	0.859711143
lnc-UGP2-4	CEBPZ	0.976019829
lnc-UMODL1-7	CEBPZ	0.972236558
lnc-UPB1-2	CEBPZ	0.691581097
lnc-URB2-1	CEBPZ	0.728102278
lnc-USP35-3	CEBPZ	0.755350719
lnc-USP45-1	CEBPZ	0.746157115
lnc-USP50-1	CEBPZ	0.986015106
lnc-USP50-2	CEBPZ	0.88497625
lnc-USP7-1	CEBPZ	0.735175371
lnc-USP8-1	CEBPZ	0.692863378
lnc-USPL1-2	CEBPZ	-0.760474807
lnc-VAT1-1	CEBPZ	0.749048203
lnc-VMAC-1	CEBPZ	0.827232357
lnc-VN1R2-3	CEBPZ	0.991952395
lnc-VN1R2-8	CEBPZ	0.836579929
lnc-VN1R2-9	CEBPZ	0.704681372
lnc-VPS4B-1	CEBPZ	0.822681211
lnc-VRK3-2	CEBPZ	0.916636702
lnc-WDPCP-2	CEBPZ	0.852016792
lnc-WDR34-2	CEBPZ	0.936186818
lnc-WDR41-1	CEBPZ	0.891910953
lnc-WDR45L-1	CEBPZ	0.857618137
lnc-WDR60-11	CEBPZ	0.742462325
lnc-WDR67-1	CEBPZ	0.725277278
lnc-WDR73-9	CEBPZ	0.843357983
lnc-WDR77-2	CEBPZ	0.920444095
lnc-WDR81-2	CEBPZ	0.790949407
lnc-WDR86-2	CEBPZ	0.86236412
lnc-WDSUB1-3	CEBPZ	0.708638695
lnc-WNT1-2	CEBPZ	0.882967921
lnc-WNT8A-2	CEBPZ	0.771758272
lnc-WRNIP1-3	CEBPZ	0.86656489
lnc-XRCC6-1	CEBPZ	0.773601437
lnc-YIF1A-1	CEBPZ	0.71053349
lnc-YIF1A-4	CEBPZ	0.988756777
lnc-YIF1B-1	CEBPZ	0.706038223
lnc-ZAP70-1	CEBPZ	0.702202801
lnc-ZBED4-1	CEBPZ	0.765354818
lnc-ZBTB25-2	CEBPZ	0.991251934
lnc-ZBTB25-5	CEBPZ	0.704981928
lnc-ZBTB37-2	CEBPZ	0.713595781
lnc-ZBTB4-3	CEBPZ	0.728711872
lnc-ZC3H12B-12	CEBPZ	0.743919722
lnc-ZC3H6-3	CEBPZ	0.731346394
lnc-ZFAND1-1	CEBPZ	0.752808169
lnc-ZFAND3-4	CEBPZ	0.726628331
lnc-ZFP62-1	CEBPZ	0.839881103
lnc-ZFYVE1-1	CEBPZ	0.720564434
lnc-ZFYVE9-1	CEBPZ	0.78797672
lnc-ZNF131-10	CEBPZ	0.832135698
lnc-ZNF146-1	CEBPZ	0.773975058
lnc-ZNF175-1	CEBPZ	0.717197146
lnc-ZNF177-1	CEBPZ	0.881279032
lnc-ZNF235-2	CEBPZ	0.958128363
lnc-ZNF257-5	CEBPZ	0.962732038
lnc-ZNF382-1	CEBPZ	0.718095484
lnc-ZNF394-1	CEBPZ	0.90979721
lnc-ZNF397-2	CEBPZ	0.715904255
lnc-ZNF423-3	CEBPZ	0.696051668
lnc-ZNF44-1	CEBPZ	0.950000337
lnc-ZNF445-4	CEBPZ	0.813442137
lnc-ZNF45-2	CEBPZ	0.877244
lnc-ZNF45-4	CEBPZ	0.981109184
lnc-ZNF486-6	CEBPZ	0.873601936
lnc-ZNF506-2	CEBPZ	0.988847275
lnc-ZNF514-2	CEBPZ	0.875258697
lnc-ZNF551-2	CEBPZ	0.78320401
lnc-ZNF575-1	CEBPZ	0.735233364
lnc-ZNF582-3	CEBPZ	0.788577644
lnc-ZNF583-5	CEBPZ	0.773988177
lnc-ZNF585A-3	CEBPZ	0.882243858
lnc-ZNF613-7	CEBPZ	0.93709536
lnc-ZNF680-14	CEBPZ	0.723143817
lnc-ZNF681-2	CEBPZ	0.941043745
lnc-ZNF681-4	CEBPZ	0.900467616
lnc-ZNF687-1	CEBPZ	0.93857917
lnc-ZNF701-2	CEBPZ	0.944108272
lnc-ZNF710-1	CEBPZ	0.715080541
lnc-ZNF724P-2	CEBPZ	-0.764454494
lnc-ZNF727-6	CEBPZ	0.82897907
lnc-ZNF732-4	CEBPZ	0.743395758
lnc-ZNF738-5	CEBPZ	0.991660955
lnc-ZNF740-2	CEBPZ	0.763363863
lnc-ZNF775-1	CEBPZ	0.916270829
lnc-ZNF780B-1	CEBPZ	0.939952524
lnc-ZNF790-1	CEBPZ	0.882508922
lnc-ZNF791-3	CEBPZ	0.806839182
lnc-ZNF792-5	CEBPZ	0.884003197
lnc-ZNF804B-1	CEBPZ	-0.724114138
lnc-ZNF804B-2	CEBPZ	-0.741429408
lnc-ZNF814-1	CEBPZ	0.723206246
lnc-ZNF823-2	CEBPZ	0.880911695
lnc-ZNF827-1	CEBPZ	0.71059952
lnc-ZNF83-4	CEBPZ	0.738802225
lnc-ZNF83-6	CEBPZ	0.943843298
lnc-ZNF83-7	CEBPZ	0.706121303
lnc-ZNF841-2	CEBPZ	0.828785088
lnc-ZSCAN2-5	CEBPZ	0.712736543
lnc-ZSCAN2-6	CEBPZ	0.812592438
lnc-ZSCAN21-1	CEBPZ	0.948744903
lnc-ZXDA-1	CEBPZ	0.87647481
LYPLAL1-AS1	CEBPZ	0.913869955
MCCC1-AS1	CEBPZ	0.985766354
MEF2C-AS1	CEBPZ	-0.838283583
MIR4435-2HG	CEBPZ	-0.791474696
MTUS2-AS2	CEBPZ	-0.935812975
MYCBP2-AS1	CEBPZ	0.931258396
MYLK-AS1	CEBPZ	0.976932815
NCBP2-AS1	CEBPZ	0.983255028
OXCT1-AS1	CEBPZ	0.76814382
PCBP1-AS1	CEBPZ	0.85311426
PCF11-AS1	CEBPZ	0.749424738
PITPNA-AS1	CEBPZ	0.907526331
PLA2G4C-AS1	CEBPZ	0.874904738
POTEH-AS1	CEBPZ	0.918744714
RAP2C-AS1	CEBPZ	0.983852652
RNF157-AS1	CEBPZ	0.809599433
SBF2-AS1	CEBPZ	0.860421424
SEMA3F-AS1	CEBPZ	0.796209926
SNAP25-AS1	CEBPZ	0.879231315
SPAG5-AS1	CEBPZ	0.779663591
STARD4-AS1	CEBPZ	0.942572722
SUCLA2-AS1	CEBPZ	0.690430449
TAB3-AS2	CEBPZ	0.908714718
TH2LCRR	CEBPZ	0.904957063
THRIL	CEBPZ	0.701532773
TMEM246-AS1	CEBPZ	0.709341003
TNRC6C-AS1	CEBPZ	0.702203114
TRG-AS1	CEBPZ	0.915221588
TRIM52-AS1	CEBPZ	0.861517774
TTC3-AS1	CEBPZ	0.860249769
UBXN7-AS1	CEBPZ	0.918412337
XLOC_000090	CEBPZ	0.728507908
XLOC_000108	CEBPZ	0.827215611
XLOC_000300	CEBPZ	0.96984705
XLOC_002818	CEBPZ	0.937338625
XLOC_003475	CEBPZ	-0.702389587
XLOC_006489	CEBPZ	-0.723272144
XLOC_006773	CEBPZ	0.689465549
XLOC_1014483	CEBPZ	0.793170897
XLOC_1015300	CEBPZ	0.928476587
XLOC_1016089	CEBPZ	0.789246735
XLOC_1017529	CEBPZ	0.772475905
XLOC_1093604	CEBPZ	0.89840244
XLOC_1093877	CEBPZ	0.71698831
XLOC_1093878	CEBPZ	0.703887671
XLOC_1093926	CEBPZ	0.910167841
XLOC_1174083	CEBPZ	0.736818353
XLOC_1174280	CEBPZ	0.862337174
XLOC_1174283	CEBPZ	0.767488055
XLOC_1174686	CEBPZ	0.715349843
XLOC_1174702	CEBPZ	0.860153346
XLOC_1174715	CEBPZ	0.838275126
XLOC_1174717	CEBPZ	0.85328599
XLOC_1174749	CEBPZ	0.697839525
XLOC_1175427	CEBPZ	0.890949708
XLOC_1175511	CEBPZ	0.845866081
XLOC_1175771	CEBPZ	0.697223347
XLOC_1175795	CEBPZ	0.960776906
XLOC_1176009	CEBPZ	0.694900558
XLOC_1176066	CEBPZ	0.981275112
XLOC_1176366	CEBPZ	0.939750067
XLOC_1176581	CEBPZ	0.772431859
XLOC_1176618	CEBPZ	0.823287492
XLOC_1176619	CEBPZ	0.977268969
XLOC_1176874	CEBPZ	0.767389205
XLOC_1176877	CEBPZ	0.69247561
XLOC_1177405	CEBPZ	0.918098556
XLOC_1177575	CEBPZ	0.844795473
XLOC_1178154	CEBPZ	0.75174926
XLOC_1228939	CEBPZ	-0.806624445
XLOC_1230118	CEBPZ	0.873312893
XLOC_1230520	CEBPZ	0.903744245
XLOC_1230810	CEBPZ	0.79611689
XLOC_1231971	CEBPZ	0.711665935
XLOC_1232275	CEBPZ	0.69750121
XLOC_1232514	CEBPZ	0.976109693
XLOC_1233095	CEBPZ	0.834011394
XLOC_1235635	CEBPZ	0.71908646
XLOC_1236338	CEBPZ	0.694023035
XLOC_1482847	CEBPZ	0.893062158
XLOC_1483319	CEBPZ	-0.70754627
XLOC_1483332	CEBPZ	0.986384933
XLOC_1484827	CEBPZ	0.766718081
XLOC_1484828	CEBPZ	0.999131561
XLOC_1547746	CEBPZ	-0.857291747
XLOC_1585064	CEBPZ	0.797467789
XLOC_1586489	CEBPZ	0.789498738
XLOC_1621640	CEBPZ	0.710861059
XLOC_1621861	CEBPZ	0.691789719
XLOC_1622112	CEBPZ	0.691632763
XLOC_1622314	CEBPZ	0.816435052
XLOC_1622484	CEBPZ	0.98453617
XLOC_1622587	CEBPZ	0.719861607
XLOC_1623353	CEBPZ	0.980802943
XLOC_1623377	CEBPZ	0.783503774
XLOC_1623391	CEBPZ	0.871084904
XLOC_1623520	CEBPZ	0.697332323
XLOC_1623747	CEBPZ	0.707150782
XLOC_1623935	CEBPZ	0.727277705
XLOC_1624910	CEBPZ	0.861529677
XLOC_1625085	CEBPZ	0.922367865
XLOC_1625271	CEBPZ	0.963865106
XLOC_1828024	CEBPZ	-0.848128738
XLOC_1828067	CEBPZ	0.906386901
XLOC_1828250	CEBPZ	0.706190671
XLOC_1829717	CEBPZ	0.821532338
XLOC_1830341	CEBPZ	0.811735069
XLOC_1830759	CEBPZ	-0.764199579
XLOC_1830773	CEBPZ	-0.832237572
XLOC_1831791	CEBPZ	0.922392586
XLOC_2028126	CEBPZ	-0.777765907
XLOC_2028132	CEBPZ	-0.866963867
XLOC_2030250	CEBPZ	0.726756929
XLOC_2030363	CEBPZ	0.700281407
XLOC_2032959	CEBPZ	0.732456138
XLOC_2217240	CEBPZ	0.804747347
XLOC_2217271	CEBPZ	0.710148749
XLOC_2217833	CEBPZ	0.906084687
XLOC_2218192	CEBPZ	0.915212421
XLOC_2218929	CEBPZ	0.755465865
XLOC_2220157	CEBPZ	0.822208038
XLOC_2220896	CEBPZ	0.961117068
XLOC_235729	CEBPZ	0.780230472
XLOC_235741	CEBPZ	0.742136035
XLOC_2393336	CEBPZ	0.86547548
XLOC_2393515	CEBPZ	0.911662884
XLOC_2394807	CEBPZ	0.712527891
XLOC_2394941	CEBPZ	0.897885973
XLOC_2395743	CEBPZ	0.910893069
XLOC_2557495	CEBPZ	0.903773305
XLOC_2558149	CEBPZ	0.859643343
XLOC_2558435	CEBPZ	0.698569799
XLOC_2559906	CEBPZ	0.937906757
XLOC_2712228	CEBPZ	0.689670636
XLOC_2712257	CEBPZ	0.800232725
XLOC_2712490	CEBPZ	0.78232438
XLOC_2712801	CEBPZ	0.861897076
XLOC_2714423	CEBPZ	0.889658599
XLOC_2714543	CEBPZ	0.688352007
XLOC_2834721	CEBPZ	-0.787809663
XLOC_2835377	CEBPZ	-0.812911989
XLOC_2835378	CEBPZ	-0.75467735
XLOC_2836988	CEBPZ	-0.744526711
XLOC_2837388	CEBPZ	-0.692428684
XLOC_2839044	CEBPZ	-0.861452052
XLOC_2839990	CEBPZ	-0.873270368
XLOC_2840072	CEBPZ	-0.748365218
XLOC_2840550	CEBPZ	0.736842318
XLOC_2840602	CEBPZ	-0.795139741
XLOC_2993599	CEBPZ	-0.918464663
XLOC_375822	CEBPZ	0.966248001
XLOC_375823	CEBPZ	0.814685518
XLOC_375824	CEBPZ	0.892241232
XLOC_376248	CEBPZ	-0.728802341
XLOC_376348	CEBPZ	0.964446896
XLOC_376899	CEBPZ	0.913316604
XLOC_378168	CEBPZ	0.736683557
XLOC_378685	CEBPZ	0.845471095
XLOC_379277	CEBPZ	-0.777995662
XLOC_514233	CEBPZ	0.950221064
XLOC_514513	CEBPZ	0.755717083
XLOC_515042	CEBPZ	0.891278327
XLOC_515249	CEBPZ	0.917786341
XLOC_515583	CEBPZ	0.881254449
XLOC_515896	CEBPZ	0.713081995
XLOC_515910	CEBPZ	0.806986084
XLOC_516577	CEBPZ	0.687951385
XLOC_516712	CEBPZ	0.977530107
XLOC_517115	CEBPZ	0.695400508
XLOC_651258	CEBPZ	0.724798906
XLOC_753553	CEBPZ	0.984652483
XLOC_753555	CEBPZ	0.739008627
XLOC_753809	CEBPZ	0.816330175
XLOC_754819	CEBPZ	0.767872852
XLOC_754873	CEBPZ	0.982178564
XLOC_845107	CEBPZ	-0.884933479
XLOC_845645	CEBPZ	0.945141941
XLOC_846837	CEBPZ	0.714813176
XLOC_847052	CEBPZ	0.760770317
XLOC_847150	CEBPZ	0.875471314
XLOC_847185	CEBPZ	0.867006713
XLOC_847555	CEBPZ	0.945870826
XLOC_930843	CEBPZ	0.712306858
XLOC_932070	CEBPZ	0.87719574
XLOC_932582	CEBPZ	0.728178942
XLOC_934016	CEBPZ	0.686393683
ZBTB20-AS1	CEBPZ	0.9101938
ZNF571-AS1	CEBPZ	0.945636252
ZNF793-AS1	CEBPZ	0.83019675
ZSCAN16-AS1	CEBPZ	0.956026786
GMDS-AS1	ERN1	0.806803905
LINC00115	ERN1	0.872130215
LINC00466	ERN1	0.738014014
LINC00943	ERN1	0.815250451
LINC01224	ERN1	0.724409755
LINC01270	ERN1	0.83267079
LINC01550	ERN1	0.79592326
LIPE-AS1	ERN1	-0.697141439
lnc-AC073416.2-11	ERN1	0.697744453
lnc-AC107021.1-9	ERN1	0.786757733
lnc-ACMSD-6	ERN1	0.734507931
lnc-AL033381.1-4	ERN1	0.766262716
lnc-ALX4-7	ERN1	-0.836754154
lnc-ANKRD30A-5	ERN1	0.696373282
lnc-APEX1-2	ERN1	0.764975887
lnc-ARHGAP32-4	ERN1	-0.688332683
lnc-ASPRV1-2	ERN1	-0.725777014
lnc-ATM-2	ERN1	-0.688245767
lnc-ATP1A3-1	ERN1	0.740947229
lnc-BARHL2-4	ERN1	0.860304291
lnc-BMS1-10	ERN1	0.85471045
lnc-BOD1-1	ERN1	0.739840294
lnc-C12orf40-3	ERN1	-0.71574514
lnc-C15orf41-11	ERN1	0.72592543
lnc-C1orf186-3	ERN1	0.784927029
lnc-C4orf37-2	ERN1	-0.782888768
lnc-C6orf146-3	ERN1	0.751712156
lnc-C6orf201-11	ERN1	0.831075112
lnc-C6orf201-18	ERN1	0.779596801
lnc-C7orf23-2	ERN1	-0.754913077
lnc-C8orf83-1	ERN1	0.827480593
lnc-CACNA2D3-2	ERN1	0.755659645
lnc-CALHM1-1	ERN1	0.808080619
lnc-CCDC83-1	ERN1	-0.686908597
lnc-CDK12-1	ERN1	0.881548246
lnc-CDYL2-6	ERN1	0.846495383
lnc-CHD2-3	ERN1	0.729390565
lnc-CPT2-3	ERN1	-0.732167078
lnc-CSMD1-18	ERN1	-0.690103484
lnc-CSNK1A1-1	ERN1	-0.767080537
lnc-CTC-203F4.1.1-3	ERN1	0.834829176
lnc-DHX15-1	ERN1	0.831487161
lnc-DISC1-1	ERN1	0.887906045
lnc-DNAH5-4	ERN1	0.731418891
lnc-DNAJA1-2	ERN1	0.705305357
lnc-ERV3-1-2	ERN1	0.764239285
lnc-EXOC2-21	ERN1	0.860842042
lnc-FAM110B-11	ERN1	0.828690017
lnc-FAM110B-12	ERN1	0.740000894
lnc-FAM138A-3	ERN1	0.773923092
lnc-GRIA3-5	ERN1	0.89665546
lnc-GRM7-2	ERN1	0.832529132
lnc-HRASLS-2	ERN1	0.709519876
lnc-IGFN1-5	ERN1	0.701428629
lnc-IL17B-5	ERN1	0.927747277
lnc-KHDRBS3-9	ERN1	0.774447269
lnc-KIAA1644-1	ERN1	0.705220404
lnc-KNTC1-3	ERN1	0.715294332
lnc-LAMA5-4	ERN1	-0.691275456
lnc-LEP-1	ERN1	-0.791397913
lnc-LEPROTL1-9	ERN1	0.75760129
lnc-MARCH10-4	ERN1	0.851342846
lnc-MBTPS2-2	ERN1	0.912104733
lnc-MST1P9-3	ERN1	0.753612965
lnc-MTR-1	ERN1	0.72583821
lnc-MYB-13	ERN1	0.748867368
lnc-MYO19-2	ERN1	0.816282371
lnc-NAALADL2-8	ERN1	0.749442969
lnc-NBN-1	ERN1	0.877003002
lnc-NBPF9-4	ERN1	0.88153215
lnc-NCEH1-1	ERN1	0.749213301
lnc-NCOA3-9	ERN1	0.721178372
lnc-NDUFAB1-1	ERN1	-0.715193664
lnc-NEDD1-8	ERN1	0.861323805
lnc-NTF3-3	ERN1	0.71111808
lnc-NUDT16-1	ERN1	0.750595373
lnc-OR4F16-3	ERN1	0.715508945
lnc-PAH-3	ERN1	0.716483939
lnc-PCK1-4	ERN1	0.807392569
lnc-PHLPP2-1	ERN1	-0.703166637
lnc-PLA2G7-2	ERN1	0.756770408
lnc-POU5F1B-10	ERN1	0.792781592
lnc-PPIAL4G-8	ERN1	0.773197191
lnc-PRPF4B-5	ERN1	-0.781306607
lnc-PTDSS2-1	ERN1	0.798653192
lnc-RD3-5	ERN1	-0.770351284
lnc-RFC2-5	ERN1	0.743698009
lnc-RHBDD3-1	ERN1	0.830859949
lnc-RP11-404L6.2.1-4	ERN1	0.804640494
lnc-RP11-796G6.2.1-3	ERN1	-0.747192484
lnc-RPS24-3	ERN1	0.739341369
lnc-RPS4XP21-1	ERN1	-0.748966855
lnc-RTN4IP1-2	ERN1	0.811061012
lnc-RUNDC3B-1	ERN1	0.833250236
lnc-SAA2-2	ERN1	-0.701336909
lnc-SAMD5-2	ERN1	0.796950433
lnc-SAP30-2	ERN1	0.702597379
lnc-SBDS-4	ERN1	0.793392135
lnc-SBF2-1	ERN1	0.794974872
lnc-SDCCAG8-3	ERN1	-0.736376168
lnc-SETDB1-1	ERN1	-0.86418087
lnc-SIRPG-1	ERN1	0.733182017
lnc-SMAD4-2	ERN1	0.697688844
lnc-SNX11-7	ERN1	0.795245845
lnc-SOD3-1	ERN1	0.709562772
lnc-SPP1-1	ERN1	0.806189514
lnc-ST6GAL2-1	ERN1	0.782401996
lnc-TAF9-7	ERN1	0.92227698
lnc-TAL2-2	ERN1	0.782888601
lnc-TMEM132B-9	ERN1	0.83873258
lnc-TMEM164-2	ERN1	-0.692558027
lnc-TMEM41B-4	ERN1	-0.768205853
lnc-TPCN2-1	ERN1	-0.690149266
lnc-TREX1-2	ERN1	-0.704935223
lnc-TRMT11-1	ERN1	0.743944392
lnc-UBE2N-1	ERN1	0.834731522
lnc-VPS13D-1	ERN1	0.715731638
lnc-WDR26-1	ERN1	0.801231308
lnc-WDR27-1	ERN1	0.828277692
lnc-YPEL5-1	ERN1	0.742550007
lnc-ZFYVE1-1	ERN1	-0.690517095
lnc-ZNF30-1	ERN1	0.730681263
lnc-ZNF862-1	ERN1	0.84509011
LUCAT1	ERN1	0.886476513
MEF2C-AS1	ERN1	0.720740358
MEG3	ERN1	0.732675364
MIR205HG	ERN1	0.840675862
MIR4435-2HG	ERN1	0.775531684
RAD51-AS1	ERN1	0.686269144
SATB1-AS1	ERN1	0.747196654
TMEM9B-AS1	ERN1	0.869719759
XLOC_001052	ERN1	-0.788009424
XLOC_002503	ERN1	0.813751803
XLOC_006489	ERN1	0.762369074
XLOC_1016241	ERN1	0.697364464
XLOC_1176874	ERN1	-0.840715867
XLOC_1483768	ERN1	0.850735587
XLOC_1546890	ERN1	0.703818251
XLOC_1829856	ERN1	-0.73175708
XLOC_1830759	ERN1	0.707808309
XLOC_2028133	ERN1	0.734438342
XLOC_2218929	ERN1	-0.763834891
XLOC_2396126	ERN1	0.823350686
XLOC_2558569	ERN1	0.851215583
XLOC_2712832	ERN1	0.741250197
XLOC_2835382	ERN1	0.808740668
XLOC_2836451	ERN1	0.950759217
XLOC_2836988	ERN1	0.731425826
XLOC_2837223	ERN1	0.915818766
XLOC_2839044	ERN1	0.728459632
XLOC_2840602	ERN1	0.717969611
XLOC_376248	ERN1	0.705735839
XLOC_379275	ERN1	-0.815656563
XLOC_931668	ERN1	0.818962351
XLOC_931842	ERN1	0.74427003
ZRANB2-AS2	ERN1	0.808248553
ARSD-AS1	ATF5	0.901934596
ATP6V0E2-AS1	ATF5	0.695840167
B3GALT5-AS1	ATF5	-0.689571208
BIRC6-AS1	ATF5	0.734049433
BOLA3-AS1	ATF5	0.89097427
CASC15	ATF5	-0.786769783
CASK-AS1	ATF5	0.819358426
CCDC144NL-AS1	ATF5	0.694382388
CFLAR-AS1	ATF5	0.858548365
CNOT10-AS1	ATF5	0.882406872
DCTN1-AS1	ATF5	0.921263695
DLGAP4-AS1	ATF5	0.763084703
DNMBP-AS1	ATF5	0.736636104
EAF1-AS1	ATF5	0.878357756
EIF1B-AS1	ATF5	0.779979532
EVX1-AS	ATF5	0.987729235
FAM13A-AS1	ATF5	0.899214531
FLNB-AS1	ATF5	0.794848577
GRTP1-AS1	ATF5	0.966472796
GTF3C2-AS1	ATF5	0.722127358
HAGLROS	ATF5	0.925976512
IDH1-AS1	ATF5	0.985399325
IDI2-AS1	ATF5	0.8041664
IGBP1-AS2	ATF5	0.715162016
IQCH-AS1	ATF5	0.693707864
ITGA9-AS1	ATF5	-0.852819003
KDM4A-AS1	ATF5	0.741869678
LINC00237	ATF5	-0.739523184
LINC00620	ATF5	-0.742525466
LINC00649	ATF5	0.712956138
LINC00890	ATF5	0.812159038
LINC00959	ATF5	-0.719216566
LINC01091	ATF5	-0.739346938
LINC01224	ATF5	-0.694741154
lnc-A1BG-3	ATF5	0.690632823
lnc-AARS-1	ATF5	0.884536859
lnc-ABCA5-7	ATF5	0.905004032
lnc-ABCC4-1	ATF5	0.706650468
lnc-ABCD3-1	ATF5	-0.787897584
lnc-ABHD12B-1	ATF5	0.918696161
lnc-AC002553.1-1	ATF5	0.985950388
lnc-AC006050.2.1-6	ATF5	0.974341287
lnc-AC007390.5.1-4	ATF5	0.881544346
lnc-AC008073.6.1-2	ATF5	0.927668947
lnc-AC010336.2-1	ATF5	0.956631621
lnc-AC010872.2.1-2	ATF5	-0.6983304
lnc-AC018816.3.1-11	ATF5	0.954814012
lnc-AC018816.3.1-9	ATF5	0.931290745
lnc-AC079341.1-10	ATF5	0.974481733
lnc-AC091132.1-3	ATF5	0.803494406
lnc-AC092295.7.1-2	ATF5	0.831936366
lnc-AC114947.1.1-1	ATF5	0.816572725
lnc-AC127496.3-6	ATF5	0.738130299
lnc-AC127496.3-7	ATF5	0.9614309
lnc-ACSBG1-4	ATF5	0.904095624
lnc-ACVR2B-1	ATF5	0.753086345
lnc-ADAMTS18-1	ATF5	0.889406568
lnc-ADAMTS18-3	ATF5	0.869407376
lnc-AF127577.1-3	ATF5	0.879839707
lnc-AF131216.6.1-2	ATF5	0.731241902
lnc-AFM-3	ATF5	0.918895843
lnc-AGGF1-1	ATF5	0.689953895
lnc-AGMAT-4	ATF5	0.991499092
lnc-AGPS-3	ATF5	0.834195506
lnc-AHSA2-5	ATF5	0.824920454
lnc-AIDA-1	ATF5	0.943348764
lnc-AIDA-2	ATF5	0.800792146
lnc-AL136219.1-3	ATF5	0.787526047
lnc-AL590867.1-4	ATF5	0.760173211
lnc-AL901608.1-17	ATF5	-0.745783928
lnc-AL901608.1-3	ATF5	-0.731860724
lnc-ALG3-3	ATF5	0.834610655
lnc-ALPK1-2	ATF5	0.725947452
lnc-ALPK2-6	ATF5	0.871255012
lnc-ALX4-5	ATF5	0.977991229
lnc-AMDHD1-2	ATF5	0.95256339
lnc-AMDHD1-3	ATF5	0.989638624
lnc-AMDHD1-4	ATF5	0.904079775
lnc-AMDHD2-2	ATF5	0.772870419
lnc-AMN-1	ATF5	0.745273478
lnc-ANGPT2-2	ATF5	0.883081994
lnc-ANGPTL2-1	ATF5	0.88129571
lnc-ANKMY2-1	ATF5	0.98524819
lnc-ANKRD20A2-14	ATF5	0.87074098
lnc-ANKRD27-6	ATF5	0.826180241
lnc-ANKS6-1	ATF5	0.958210916
lnc-AP002414.1.1-1	ATF5	0.744756744
lnc-AP005482.1.1-2	ATF5	0.787286112
lnc-AP1S2-1	ATF5	0.978080028
lnc-AP3S1-1	ATF5	0.891543271
lnc-AP3S1-15	ATF5	0.972899268
lnc-AP3S1-4	ATF5	0.812643721
lnc-AP4E1-1	ATF5	0.863584526
lnc-APC-4	ATF5	0.979461959
lnc-APITD1-CORT-1	ATF5	0.874487316
lnc-AQP8-1	ATF5	0.701826639
lnc-ARHGAP28-7	ATF5	0.807467819
lnc-ARHGAP32-4	ATF5	0.795644822
lnc-ARHGEF26-3	ATF5	0.867654738
lnc-ARHGEF40-1	ATF5	0.733021523
lnc-ARID5A-2	ATF5	0.914461058
lnc-ARL1-3	ATF5	0.965593961
lnc-ARL13A-1	ATF5	0.700947189
lnc-ARL4C-2	ATF5	0.83447789
lnc-ARL4D-1	ATF5	0.942241554
lnc-ARMC2-1	ATF5	0.866323214
lnc-ARRDC1-1	ATF5	0.700720498
lnc-ARVCF-4	ATF5	0.713872483
lnc-ASB5-1	ATF5	0.784446044
lnc-ASCC2-1	ATF5	0.963737059
lnc-ASH2L-1	ATF5	0.686753221
lnc-ASPRV1-2	ATF5	0.756424765
lnc-ATG10-6	ATF5	0.719128368
lnc-ATG12-5	ATF5	0.706087394
lnc-ATM-1	ATF5	0.994337592
lnc-ATM-2	ATF5	0.80301403
lnc-ATP11B-6	ATF5	0.846992032
lnc-ATP6V1C2-2	ATF5	0.974946106
lnc-ATP6V1C2-4	ATF5	0.888031503
lnc-ATP6V1G3-4	ATF5	-0.809246372
lnc-B4GALT7-1	ATF5	0.916315923
lnc-B9D1-1	ATF5	0.93270833
lnc-BASP1-1	ATF5	0.802140732
lnc-BCL2L13-3	ATF5	0.826323726
lnc-BCL6-9	ATF5	0.883515431
lnc-BEAN1-1	ATF5	0.81630998
lnc-BIRC8-3	ATF5	0.79117113
lnc-BLCAP-1	ATF5	-0.724637099
lnc-BLNK-4	ATF5	0.757709469
lnc-BRAT1-2	ATF5	0.751643085
lnc-BRD7-3	ATF5	0.760063364
lnc-BRI3-1	ATF5	0.851511255
lnc-BRMS1L-7	ATF5	0.883807206
lnc-BTD-1	ATF5	0.905337857
lnc-C11orf49-3	ATF5	0.900516766
lnc-C12orf40-3	ATF5	0.710619726
lnc-C12orf60-2	ATF5	-0.690813268
lnc-C12orf66-1	ATF5	0.691554793
lnc-C14orf102-1	ATF5	0.86667721
lnc-C14orf28-2	ATF5	0.855077193
lnc-C15orf44-1	ATF5	0.69783302
lnc-C15orf48-1	ATF5	0.742159623
lnc-C16orf58-5	ATF5	0.760112304
lnc-C16orf61-1	ATF5	0.807985777
lnc-C17orf101-3	ATF5	-0.802133509
lnc-C17orf104-1	ATF5	0.784646444
lnc-C17orf48-1	ATF5	0.975126429
lnc-C17orf97-5	ATF5	0.696513496
lnc-C18orf42-3	ATF5	0.893622674
lnc-C19orf44-5	ATF5	0.704086384
lnc-C19orf6-3	ATF5	0.73541153
lnc-C1orf106-1	ATF5	-0.919795649
lnc-C1orf112-3	ATF5	0.915269007
lnc-C1orf122-1	ATF5	0.918206649
lnc-C1orf201-3	ATF5	0.866007325
lnc-C1orf43-4	ATF5	0.827825362
lnc-C1orf56-1	ATF5	0.735934323
lnc-C1QBP-1	ATF5	0.694076272
lnc-C1QL3-1	ATF5	0.923260064
lnc-C1QTNF5-1	ATF5	0.716786703
lnc-C1S-1	ATF5	0.953287693
lnc-C20orf187-1	ATF5	-0.916061866
lnc-C2orf40-8	ATF5	0.780235186
lnc-C2orf89-2	ATF5	0.933779904
lnc-C3orf17-2	ATF5	0.89586002
lnc-C3orf24-1	ATF5	0.956128857
lnc-C4orf21-1	ATF5	0.959814213
lnc-C5orf25-1	ATF5	0.815609391
lnc-C5orf27-4	ATF5	0.7791698
lnc-C5orf32-3	ATF5	0.860074966
lnc-C5orf35-3	ATF5	0.980993393
lnc-C5orf39-1	ATF5	0.765093628
lnc-C5orf39-3	ATF5	0.957345413
lnc-C5orf45-1	ATF5	0.872565153
lnc-C6orf105-5	ATF5	0.823594128
lnc-C6orf108-1	ATF5	0.730556117
lnc-C6orf112-8	ATF5	0.886026273
lnc-C6orf146-4	ATF5	0.795159865
lnc-C7orf71-4	ATF5	0.860076388
lnc-C8orf42-4	ATF5	0.909786246
lnc-C8orf56-3	ATF5	0.827164137
lnc-C9orf103-7	ATF5	0.909946253
lnc-C9orf152-5	ATF5	0.833608509
lnc-C9orf3-6	ATF5	0.97261586
lnc-C9orf43-1	ATF5	0.810615446
lnc-C9orf57-3	ATF5	0.982807546
lnc-C9orf66-7	ATF5	0.72314579
lnc-CAPN13-1	ATF5	0.938059052
lnc-CAPN2-2	ATF5	0.911238223
lnc-CBR1-1	ATF5	0.936126774
lnc-CBY3-3	ATF5	0.926727828
lnc-CCDC125-22	ATF5	0.905069435
lnc-CCDC148-1	ATF5	0.981217123
lnc-CCDC152-2	ATF5	0.899250075
lnc-CCDC68-1	ATF5	0.831672251
lnc-CCDC7-2	ATF5	0.696869581
lnc-CCDC70-2	ATF5	0.833264185
lnc-CCDC83-1	ATF5	0.837298389
lnc-CCDC85C-2	ATF5	0.732700186
lnc-CCL27-1	ATF5	0.878776272
lnc-CCM2-2	ATF5	0.838014683
lnc-CCNB1IP1-2	ATF5	0.896594279
lnc-CCRN4L-14	ATF5	0.736567119
lnc-CD151-2	ATF5	0.890444197
lnc-CD37-1	ATF5	0.698782298
lnc-CD47-7	ATF5	0.710053309
lnc-CD53-2	ATF5	0.922110607
lnc-CDC42SE1-1	ATF5	0.720399158
lnc-CDH18-7	ATF5	-0.70358776
lnc-CDIPT-1	ATF5	0.686885399
lnc-CDK1-3	ATF5	0.818529001
lnc-CDK12-2	ATF5	0.896543506
lnc-CDK20-12	ATF5	0.819800312
lnc-CDKL1-1	ATF5	0.933277515
lnc-CELF3-2	ATF5	0.841800149
lnc-CEMP1-10	ATF5	0.842963476
lnc-CHAC1-4	ATF5	0.99772381
lnc-CHADL-3	ATF5	0.89056597
lnc-CHMP4C-1	ATF5	0.900539893
lnc-CHRNA3-5	ATF5	0.991436263
lnc-CHRNA9-2	ATF5	0.992021804
lnc-CHST7-2	ATF5	0.717421039
lnc-CHSY1-6	ATF5	0.869909056
lnc-CIB3-1	ATF5	0.69930788
lnc-CKAP4-1	ATF5	0.888035601
lnc-CLRN2-1	ATF5	0.834601834
lnc-CMBL-5	ATF5	0.718798606
lnc-CNDP1-1	ATF5	0.852851237
lnc-CNIH3-2	ATF5	-0.844386588
lnc-COG3-2	ATF5	0.771606887
lnc-COIL-2	ATF5	0.820083103
lnc-COMMD1-1	ATF5	0.711251888
lnc-COQ9-1	ATF5	0.945978188
lnc-COTL1-2	ATF5	0.729990293
lnc-CPLX1-2	ATF5	0.828386581
lnc-CPLX1-3	ATF5	0.834594083
lnc-CPM-1	ATF5	0.824344328
lnc-CPM-2	ATF5	0.98700548
lnc-CPM-3	ATF5	0.905792165
lnc-CPT2-3	ATF5	0.771930879
lnc-CREG1-2	ATF5	0.981149628
lnc-CREM-6	ATF5	0.827048095
lnc-CRHR1-5	ATF5	0.81676911
lnc-CRHR1-6	ATF5	0.946171758
lnc-CROCC-2	ATF5	0.724524526
lnc-CSMD1-18	ATF5	0.713938323
lnc-CSNK1A1-7	ATF5	0.976453558
lnc-CTNS-1	ATF5	0.843733439
lnc-CTRB1-2	ATF5	0.905298659
lnc-CTSZ-7	ATF5	0.84562715
lnc-CTU2-2	ATF5	0.68850023
lnc-CXADR-1	ATF5	0.75104471
lnc-CXorf58-2	ATF5	0.708421017
lnc-CYB561-5	ATF5	0.705230785
lnc-CYB5D2-2	ATF5	0.962067512
lnc-CYB5R2-3	ATF5	-0.944502899
lnc-CYB5R2-5	ATF5	0.784397269
lnc-CYFIP1-3	ATF5	0.870971058
lnc-CYS1-5	ATF5	0.869558209
lnc-DALRD3-1	ATF5	0.911964361
lnc-DBNDD1-1	ATF5	0.840144378
lnc-DCAF10-1	ATF5	0.714080585
lnc-DCAF6-1	ATF5	0.702580385
lnc-DDX19B-2	ATF5	0.84714244
lnc-DDX27-3	ATF5	0.941585663
lnc-DDX51-2	ATF5	0.711697039
lnc-DKK4-5	ATF5	0.827632939
lnc-DLEU7-5	ATF5	0.975971986
lnc-DLX2-3	ATF5	0.796674732
lnc-DNAJA1-1	ATF5	0.982587411
lnc-DNAJA4-1	ATF5	0.853951396
lnc-DNASE1L2-1	ATF5	0.949550127
lnc-DONSON-1	ATF5	0.749930505
lnc-DPCD-3	ATF5	0.841755408
lnc-DPP4-2	ATF5	0.79740018
lnc-DR1-1	ATF5	0.762646133
lnc-DSCC1-1	ATF5	0.854886933
lnc-DUPD1-2	ATF5	0.719775205
lnc-DUSP11-3	ATF5	0.701448008
lnc-DUSP11-4	ATF5	0.858979568
lnc-DUSP14-4	ATF5	0.809340876
lnc-DUXA-1	ATF5	0.718217836
lnc-DUXA-3	ATF5	0.754633503
lnc-DYNC1I1-5	ATF5	0.893412919
lnc-DYSF-12	ATF5	0.982808673
lnc-EAF2-3	ATF5	0.722727897
lnc-EBNA1BP2-1	ATF5	0.869401882
lnc-ECHDC2-1	ATF5	0.713250544
lnc-ECHDC3-1	ATF5	0.705254834
lnc-EEF1A1-1	ATF5	0.890649078
lnc-EEF1B2-2	ATF5	0.963810921
lnc-EEF1B2-3	ATF5	0.888464887
lnc-EGR4-2	ATF5	0.879177497
lnc-EIF2B1-3	ATF5	0.720587707
lnc-EPOR-2	ATF5	0.958795393
lnc-ERAL1-3	ATF5	0.791021968
lnc-ERICH1-9	ATF5	-0.766866396
lnc-ERP44-1	ATF5	0.803550293
lnc-ESD-1	ATF5	0.980079384
lnc-ETNK2-7	ATF5	0.890834812
lnc-EXOC3-3	ATF5	0.728430409
lnc-EXOSC6-2	ATF5	0.821792392
lnc-FAAH2-6	ATF5	0.703030655
lnc-FABP3-1	ATF5	0.98961032
lnc-FABP3-3	ATF5	0.888548881
lnc-FAM102B-2	ATF5	0.901104366
lnc-FAM120B-3	ATF5	-0.691661494
lnc-FAM161B-2	ATF5	0.877771322
lnc-FAM162A-2	ATF5	0.869201408
lnc-FAM164C-2	ATF5	0.925271645
lnc-FAM183A-3	ATF5	0.92443282
lnc-FAM196A-1	ATF5	0.726909538
lnc-FAM198B-1	ATF5	0.948154776
lnc-FAM210A-2	ATF5	0.7975334
lnc-FAM43A-2	ATF5	0.871330572
lnc-FAM59B-3	ATF5	0.741342868
lnc-FAM72B-2	ATF5	0.86235328
lnc-FAM78A-1	ATF5	0.754584095
lnc-FAM78A-3	ATF5	0.708161205
lnc-FAM82A1-10	ATF5	0.893481558
lnc-FAM96B-3	ATF5	0.980485102
lnc-FAT2-1	ATF5	0.901148248
lnc-FBXL22-1	ATF5	0.692042506
lnc-FBXO45-3	ATF5	0.727075844
lnc-FBXO47-1	ATF5	0.696397428
lnc-FDFT1-1	ATF5	0.776401233
lnc-FEM1A-4	ATF5	0.856808488
lnc-FGFBP1-1	ATF5	0.736166645
lnc-FGFR1OP2-1	ATF5	0.855913204
lnc-FIGNL1-1	ATF5	0.74250594
lnc-FKBP2-1	ATF5	0.900603696
lnc-FKRP-1	ATF5	0.711020104
lnc-FMN1-2	ATF5	-0.929597339
lnc-FOXM1-1	ATF5	0.981906384
lnc-FOXN1-1	ATF5	0.866117135
lnc-FREM3-6	ATF5	0.70203645
lnc-FSCN2-3	ATF5	0.69784878
lnc-FTSJ3-1	ATF5	0.885417096
lnc-GADD45A-2	ATF5	0.925630437
lnc-GAMT-7	ATF5	0.969834138
lnc-GARS-2	ATF5	0.756486111
lnc-GCC1-1	ATF5	0.754032732
lnc-GCC2-1	ATF5	0.892614084
lnc-GGCT-1	ATF5	-0.822524152
lnc-GIP-5	ATF5	0.900364516
lnc-GJA4-1	ATF5	0.706732605
lnc-GJA4-2	ATF5	0.849101118
lnc-GK-3	ATF5	0.973916448
lnc-GLCCI1-1	ATF5	0.708304445
lnc-GLDN-3	ATF5	0.853796814
lnc-GLIPR1L1-2	ATF5	0.831923035
lnc-GLRX2-1	ATF5	0.974361224
lnc-GNG13-5	ATF5	-0.69328216
lnc-GNS-3	ATF5	0.88967563
lnc-GOSR2-2	ATF5	0.721144373
lnc-GPLD1-1	ATF5	0.976074101
lnc-GPR160-1	ATF5	0.989675812
lnc-GPR27-5	ATF5	0.960060301
lnc-GPR98-8	ATF5	0.744617521
lnc-GPRC5D-1	ATF5	0.976192628
lnc-GPRC5D-3	ATF5	0.731504828
lnc-GPS1-1	ATF5	0.688607319
lnc-GRHL2-14	ATF5	0.883475172
lnc-GRID2IP-1	ATF5	0.6898025
lnc-GSG1L-1	ATF5	0.689083528
lnc-GSTO2-4	ATF5	0.71632685
lnc-GTF2E2-2	ATF5	0.913412546
lnc-GTPBP1-1	ATF5	0.882957186
lnc-GTPBP1-2	ATF5	0.713306915
lnc-H2AFY2-1	ATF5	0.909767521
lnc-H3F3C-4	ATF5	0.80299367
lnc-HABP4-4	ATF5	0.908696414
lnc-HBG2-1	ATF5	0.779371361
lnc-HCN3-1	ATF5	0.927108299
lnc-HDLBP-2	ATF5	0.806454314
lnc-HDLBP-3	ATF5	0.968511723
lnc-HELZ-2	ATF5	0.914637646
lnc-HMBOX1-8	ATF5	0.980220309
lnc-HMGA1-2	ATF5	0.689199478
lnc-HMGB2-1	ATF5	0.756843859
lnc-HMGB2-3	ATF5	0.701909026
lnc-HPCAL1-2	ATF5	0.838532568
lnc-HSP90AA1-1	ATF5	0.937346707
lnc-HSPG2-1	ATF5	0.865632826
lnc-IARS2-2	ATF5	0.928801615
lnc-ID2-1	ATF5	0.936700189
lnc-ID4-2	ATF5	0.846804469
lnc-IFNG-3	ATF5	0.793604173
lnc-IFT46-1	ATF5	0.793708634
lnc-IGFBP7-1	ATF5	0.875946876
lnc-IGFL3-3	ATF5	-0.692558407
lnc-IKBIP-1	ATF5	0.941589821
lnc-IKZF1-2	ATF5	0.827971437
lnc-IKZF2-9	ATF5	0.981718802
lnc-IL12RB1-2	ATF5	0.911129224
lnc-IL23A-2	ATF5	0.694998917
lnc-IL2RG-4	ATF5	0.890310309
lnc-IL31RA-1	ATF5	0.894574935
lnc-IL6-3	ATF5	0.761001794
lnc-ILK-1	ATF5	0.803126888
lnc-ILKAP-4	ATF5	0.871970792
lnc-ING1-3	ATF5	0.986412951
lnc-INPPL1-1	ATF5	0.958507046
lnc-INTS12-1	ATF5	0.97770803
lnc-INTS12-2	ATF5	0.931000627
lnc-INTS4-1	ATF5	0.70148069
lnc-IQCG-2	ATF5	0.962632877
lnc-IQCG-6	ATF5	0.720507039
lnc-IRAK4-2	ATF5	0.91486845
lnc-IRF1-4	ATF5	0.954839516
lnc-IRF4-6	ATF5	0.829075011
lnc-IRGM-1	ATF5	0.793043114
lnc-ITGB3BP-5	ATF5	0.74801543
lnc-ITIH3-4	ATF5	0.68660915
lnc-ITPR2-2	ATF5	0.750517195
lnc-JAG1-6	ATF5	0.82179302
lnc-JUNB-2	ATF5	0.771269339
lnc-KANK3-3	ATF5	0.817185574
lnc-KAT8-2	ATF5	0.885415693
lnc-KATNAL2-5	ATF5	0.973573164
lnc-KAZALD1-1	ATF5	0.740325472
lnc-KB-1980E6.3.1-6	ATF5	0.861238533
lnc-KBTBD3-1	ATF5	0.867948313
lnc-KCNH5-3	ATF5	0.951063499
lnc-KCNJ12-4	ATF5	0.696560342
lnc-KCNJ13-1	ATF5	0.728087572
lnc-KCNT1-2	ATF5	0.948089568
lnc-KCNT1-7	ATF5	0.718072285
lnc-KCTD18-1	ATF5	0.724525222
lnc-KCTD4-1	ATF5	0.970698462
lnc-KDM3A-1	ATF5	0.865948723
lnc-KIAA0020-7	ATF5	0.934001559
lnc-KIAA0125-2	ATF5	-0.701008763
lnc-KIAA0196-5	ATF5	0.950351088
lnc-KIAA0319-1	ATF5	0.774955796
lnc-KIAA0564-2	ATF5	0.769993992
lnc-KIAA0664-2	ATF5	0.740135177
lnc-KIAA1429-6	ATF5	0.885841459
lnc-KIAA1609-1	ATF5	0.893818979
lnc-KIAA1731-1	ATF5	0.977075288
lnc-KLHDC10-2	ATF5	0.689737755
lnc-KLHL22-2	ATF5	0.699012881
lnc-KLHL25-12	ATF5	0.87485644
lnc-KLHL25-6	ATF5	0.974485315
lnc-KRBA1-2	ATF5	0.881066935
lnc-KRT80-10	ATF5	0.949267339
lnc-LAT2-2	ATF5	0.882719038
lnc-LEO1-2	ATF5	0.769192155
lnc-LEO1-4	ATF5	0.848034039
lnc-LEPRE1-1	ATF5	0.942725496
lnc-LETM2-5	ATF5	0.975396006
lnc-LIPG-2	ATF5	0.96207994
lnc-LMTK3-1	ATF5	0.714769584
lnc-LOH12CR1-1	ATF5	0.842761294
lnc-LOXL1-1	ATF5	0.79919098
lnc-LPIN2-1	ATF5	0.876101601
lnc-LRRC1-5	ATF5	0.840680538
lnc-LRRC38-2	ATF5	0.974713539
lnc-LRRC57-1	ATF5	0.874256289
lnc-LRRFIP2-1	ATF5	0.869679594
lnc-LRRN4-2	ATF5	0.856160277
lnc-LSG1-4	ATF5	0.829366489
lnc-LSM5-2	ATF5	0.985727488
lnc-LSS-1	ATF5	0.959039253
lnc-LTBR-6	ATF5	0.881992138
lnc-LUZP1-3	ATF5	0.828436297
lnc-LXN-1	ATF5	0.901543681
lnc-LYZL1-10	ATF5	0.704486667
lnc-MACC1-1	ATF5	0.949419017
lnc-MAFF-2	ATF5	0.69968856
[truncated: 4,041 more rows]
