# Supplementary material for: LncRNAs induce oxidative stress and spermatogenesis by regulating endoplasmic reticulum genes and pathways
Source: Aging (Albany NY). 2021 May 6;13(10):13764–87. doi: 10.18632/aging.202971 (PMC8202879; doi:10.18632/aging.202971)
Supplement: Supplementary Table 12 [file aging-13-202971-s012.csv]

Supplementary Table 12. OX_correlation_network.
Var1	Var2	value
LINC01016	NOXA1	0.917479873
lnc-C7orf23-2	NOXA1	-0.789744775
lnc-C8orf22-13	NOXA1	0.949210355
lnc-C8orf83-1	NOXA1	0.757394157
lnc-CBWD5-2	NOXA1	0.813555926
lnc-CCDC51-1	NOXA1	-0.747053482
lnc-CNOT7-1	NOXA1	0.740037243
lnc-GOSR2-2	NOXA1	-0.706855621
lnc-MARCKS-5	NOXA1	0.702472605
lnc-MATN2-1	NOXA1	-0.700581581
lnc-NDUFAB1-1	NOXA1	-0.768324439
lnc-PPIAL4G-5	NOXA1	0.962975825
lnc-PTPRZ1-3	NOXA1	0.789904952
lnc-RPL19-6	NOXA1	0.861400075
lnc-SSTR1-1	NOXA1	0.890513888
lnc-TBCB-1	NOXA1	-0.908580924
lnc-TRMT11-1	NOXA1	0.700465907
lnc-XRN2-10	NOXA1	0.843542458
lnc-ZNF385D-3	NOXA1	0.885361499
SPAG5-AS1	NOXA1	-0.689276279
SRRM2-AS1	NOXA1	-0.709626485
XLOC_006489	NOXA1	0.717128276
XLOC_1013595	NOXA1	0.708160337
XLOC_1093784	NOXA1	0.799949527
XLOC_2028133	NOXA1	0.760962484
XLOC_2396092	NOXA1	-0.711865739
XLOC_2835382	NOXA1	0.698799348
XLOC_2840602	NOXA1	0.729961221
ZRANB2-AS2	NOXA1	0.748701985
B3GALT5-AS1	MAPK14	-0.760761523
BIRC6-AS1	MAPK14	0.705274356
BOLA3-AS1	MAPK14	0.910627885
CBR3-AS1	MAPK14	0.826475677
DCTN1-AS1	MAPK14	0.732829174
EAF1-AS1	MAPK14	0.782025027
EVX1-AS	MAPK14	0.791371404
FAM13A-AS1	MAPK14	0.840100579
FLNB-AS1	MAPK14	0.697024449
GRTP1-AS1	MAPK14	0.725265539
HAGLROS	MAPK14	0.7927398
HOXC-AS3	MAPK14	-0.70851114
IDH1-AS1	MAPK14	0.798847392
IDI2-AS1	MAPK14	0.753646193
KDM4A-AS1	MAPK14	0.804235198
LINC00237	MAPK14	-0.833530929
lnc-ABAT-3	MAPK14	0.705739585
lnc-ABCD3-1	MAPK14	-0.942268387
lnc-ABHD12B-1	MAPK14	0.739160881
lnc-AC002553.1-1	MAPK14	0.762300995
lnc-AC006050.2.1-6	MAPK14	0.767870142
lnc-AC007390.5.1-1	MAPK14	0.756974912
lnc-AC008073.6.1-2	MAPK14	0.69214
lnc-AC008686.1-4	MAPK14	0.778931334
lnc-AC010336.2-1	MAPK14	0.74355949
lnc-AC010872.2.1-2	MAPK14	-0.769327674
lnc-AC018816.3.1-11	MAPK14	0.733592179
lnc-AC018816.3.1-9	MAPK14	0.805658151
lnc-AC079341.1-10	MAPK14	0.782660725
lnc-AC092295.7.1-2	MAPK14	0.874463444
lnc-AC115618.1-1	MAPK14	0.693916939
lnc-AC127496.3-7	MAPK14	0.797405454
lnc-ACP1-3	MAPK14	-0.722276431
lnc-ACSBG1-4	MAPK14	0.849131834
lnc-AFM-3	MAPK14	0.933609093
lnc-AGMAT-4	MAPK14	0.787057953
lnc-AIDA-1	MAPK14	0.774340091
lnc-AL136219.1-3	MAPK14	0.892229474
lnc-AL901608.1-3	MAPK14	-0.747265755
lnc-ALPK1-2	MAPK14	0.714846633
lnc-ALX4-5	MAPK14	0.769179199
lnc-AMDHD1-2	MAPK14	0.697482244
lnc-AMDHD1-3	MAPK14	0.776982988
lnc-AMDHD1-4	MAPK14	0.85386435
lnc-AMN-1	MAPK14	0.773458329
lnc-ANKMY2-1	MAPK14	0.80106262
lnc-ANKS6-1	MAPK14	0.800899122
lnc-AP1S2-1	MAPK14	0.790821287
lnc-AP3S1-15	MAPK14	0.742151162
lnc-APC-4	MAPK14	0.850189738
lnc-ARHGAP11B-8	MAPK14	-0.745654921
lnc-ARL1-3	MAPK14	0.74305098
lnc-ARL16-1	MAPK14	0.695340684
lnc-ARL4C-2	MAPK14	0.745054117
lnc-ARL4D-1	MAPK14	0.876800592
lnc-ARVCF-4	MAPK14	0.688783204
lnc-ASCC2-1	MAPK14	0.752586127
lnc-ASH2L-1	MAPK14	0.733977347
lnc-ATM-1	MAPK14	0.797126088
lnc-ATP6V1C2-2	MAPK14	0.720467154
lnc-B4GALT7-1	MAPK14	0.963635052
lnc-BASP1-1	MAPK14	0.808703453
lnc-BIRC8-3	MAPK14	0.73853623
lnc-BTD-1	MAPK14	0.925501668
lnc-C11orf41-1	MAPK14	0.7641224
lnc-C12orf23-1	MAPK14	0.813047129
lnc-C12orf60-2	MAPK14	-0.759421679
lnc-C15orf48-1	MAPK14	0.991526586
lnc-C17orf104-1	MAPK14	0.891560748
lnc-C17orf48-1	MAPK14	0.721174781
lnc-C19orf68-4	MAPK14	0.687490882
lnc-C1orf106-1	MAPK14	-0.697291546
lnc-C1orf112-3	MAPK14	0.786632173
lnc-C1orf122-1	MAPK14	0.845594399
lnc-C1orf123-1	MAPK14	0.733095151
lnc-C1QL3-1	MAPK14	0.728466384
lnc-C1S-1	MAPK14	0.782583925
lnc-C2orf78-3	MAPK14	0.864554319
lnc-C2orf89-2	MAPK14	0.781425333
lnc-C3orf23-2	MAPK14	0.694792648
lnc-C3orf24-1	MAPK14	0.798005193
lnc-C4orf21-1	MAPK14	0.735356968
lnc-C5orf27-4	MAPK14	0.909478109
lnc-C5orf35-3	MAPK14	0.757841433
lnc-C5orf39-1	MAPK14	0.80674903
lnc-C5orf39-3	MAPK14	0.782778136
lnc-C5orf45-1	MAPK14	0.756584407
lnc-C6orf105-5	MAPK14	0.952491223
lnc-C6orf146-4	MAPK14	0.928048219
lnc-C7orf45-1	MAPK14	0.775359549
lnc-C9orf103-7	MAPK14	0.838724058
lnc-C9orf3-5	MAPK14	0.739651481
lnc-C9orf3-6	MAPK14	0.766264676
lnc-C9orf57-3	MAPK14	0.759155359
lnc-CAPN13-1	MAPK14	0.737901284
lnc-CAPN2-2	MAPK14	0.779779194
lnc-CBR1-1	MAPK14	0.727213928
lnc-CBY3-3	MAPK14	0.709590073
lnc-CCDC125-22	MAPK14	0.89248191
lnc-CCDC148-1	MAPK14	0.758390046
lnc-CCM2-2	MAPK14	0.713057069
lnc-CCNB1IP1-2	MAPK14	0.810657446
lnc-CD53-2	MAPK14	0.776471546
lnc-CD80-2	MAPK14	0.962334737
lnc-CDK20-12	MAPK14	0.690204907
lnc-CDK20-4	MAPK14	-0.696762888
lnc-CDKL1-1	MAPK14	0.690602173
lnc-CGNL1-3	MAPK14	-0.753669188
lnc-CHAC1-4	MAPK14	0.77023006
lnc-CHMP4C-1	MAPK14	0.747095874
lnc-CHRNA3-5	MAPK14	0.786348052
lnc-CHRNA9-2	MAPK14	0.754854904
lnc-CKAP4-1	MAPK14	0.795400724
lnc-CLRN2-1	MAPK14	0.783027129
lnc-CMBL-5	MAPK14	0.72284708
lnc-CNIH3-2	MAPK14	-0.706710194
lnc-COMMD1-1	MAPK14	0.697182726
lnc-COQ9-1	MAPK14	0.783138118
lnc-CPM-2	MAPK14	0.777990562
lnc-CREG1-2	MAPK14	0.809836831
lnc-CREM-6	MAPK14	0.830106498
lnc-CRHR1-5	MAPK14	0.693841948
lnc-CRHR1-6	MAPK14	0.884956604
lnc-CSNK1A1-7	MAPK14	0.750318135
lnc-CTRB1-2	MAPK14	0.7777156
lnc-CYB5D2-2	MAPK14	0.771250523
lnc-CYFIP1-5	MAPK14	0.702081234
lnc-DALRD3-1	MAPK14	0.872031467
lnc-DENND4C-1	MAPK14	0.690444827
lnc-DLEU7-5	MAPK14	0.729108891
lnc-DLX2-3	MAPK14	0.967820199
lnc-DNAJA1-1	MAPK14	0.742180599
lnc-DNAJC5B-1	MAPK14	0.754695638
lnc-DNASE1L2-1	MAPK14	0.77360477
lnc-DONSON-1	MAPK14	0.742339511
lnc-DR1-1	MAPK14	0.907901912
lnc-DUSP11-4	MAPK14	0.835138847
lnc-DUSP14-4	MAPK14	0.841412039
lnc-DUXA-3	MAPK14	0.693209545
lnc-DYSF-12	MAPK14	0.767672884
lnc-EAF2-3	MAPK14	0.850161076
lnc-EEF1B2-2	MAPK14	0.780719071
lnc-EIF2B1-3	MAPK14	0.779011098
lnc-EPOR-2	MAPK14	0.755186529
lnc-ESD-1	MAPK14	0.812294206
lnc-FABP3-1	MAPK14	0.772562337
lnc-FAM161B-2	MAPK14	0.869858803
lnc-FAM178A-1	MAPK14	0.740329495
lnc-FAM179A-1	MAPK14	-0.69638511
lnc-FAM183A-3	MAPK14	0.69398502
lnc-FAM198B-1	MAPK14	0.751589711
lnc-FAM210A-2	MAPK14	0.777075145
lnc-FAM72B-2	MAPK14	0.873107765
lnc-FAM96B-3	MAPK14	0.762650207
lnc-FBXL22-1	MAPK14	0.754192021
lnc-FDFT1-1	MAPK14	0.753204229
lnc-FGFBP1-1	MAPK14	0.790822026
lnc-FKBP8-1	MAPK14	0.701206492
lnc-FMN1-2	MAPK14	-0.747244188
lnc-FMO5-1	MAPK14	0.787210031
lnc-FN1-4	MAPK14	0.71621415
lnc-FOXM1-1	MAPK14	0.867280583
lnc-FTSJ3-1	MAPK14	0.72891902
lnc-GADD45A-2	MAPK14	0.722648111
lnc-GALNTL2-1	MAPK14	-0.713508238
lnc-GAMT-7	MAPK14	0.729039301
lnc-GARS-2	MAPK14	0.959507456
lnc-GCC1-1	MAPK14	0.70377523
lnc-GK-3	MAPK14	0.748364975
lnc-GLCCI1-1	MAPK14	0.76831454
lnc-GLRX2-1	MAPK14	0.759418625
lnc-GNG13-5	MAPK14	-0.77676835
lnc-GPLD1-1	MAPK14	0.750044054
lnc-GPR160-1	MAPK14	0.763375753
lnc-GPR27-5	MAPK14	0.83858344
lnc-GPRC5D-1	MAPK14	0.800246971
lnc-GPRC5D-3	MAPK14	0.741498294
lnc-GPT2-1	MAPK14	-0.700609732
lnc-H2AFY2-1	MAPK14	0.704252005
lnc-HBG2-1	MAPK14	0.923043902
lnc-HCN3-1	MAPK14	0.783656605
lnc-HDLBP-3	MAPK14	0.748042727
lnc-HMBOX1-8	MAPK14	0.756704807
lnc-HMGB2-1	MAPK14	0.785167409
lnc-HMGB2-3	MAPK14	0.782464102
lnc-HSP90AA1-1	MAPK14	0.915440612
lnc-HTRA2-1	MAPK14	-0.709888101
lnc-IARS2-2	MAPK14	0.703748733
lnc-ID2-1	MAPK14	0.701809278
lnc-IFT46-1	MAPK14	0.914279706
lnc-IKBIP-1	MAPK14	0.737739778
lnc-IKZF2-9	MAPK14	0.797552472
lnc-ING1-3	MAPK14	0.741009251
lnc-INPPL1-1	MAPK14	0.738264289
lnc-INTS12-1	MAPK14	0.749090148
lnc-INTS12-2	MAPK14	0.733136354
lnc-IQCG-2	MAPK14	0.735965589
lnc-IRAK4-2	MAPK14	0.759678803
lnc-IRF1-4	MAPK14	0.801756717
lnc-KANK3-3	MAPK14	0.696507956
lnc-KATNAL2-5	MAPK14	0.730323535
lnc-KCNH5-3	MAPK14	0.742945541
lnc-KCTD4-1	MAPK14	0.783166307
lnc-KDM3A-1	MAPK14	0.891853947
lnc-KIAA0020-7	MAPK14	0.763784473
lnc-KIAA0125-2	MAPK14	-0.777395516
lnc-KIAA0196-5	MAPK14	0.752066353
lnc-KIAA1609-1	MAPK14	0.920759265
lnc-KIAA1731-1	MAPK14	0.78044891
lnc-KIF26A-1	MAPK14	-0.694794507
lnc-KLHL25-12	MAPK14	0.717581067
lnc-KLHL25-6	MAPK14	0.729516291
lnc-KLHL31-8	MAPK14	0.72040468
lnc-KRBA1-2	MAPK14	0.765334703
lnc-KRT80-10	MAPK14	0.702520138
lnc-LEO1-2	MAPK14	0.757138377
lnc-LEPRE1-1	MAPK14	0.728354078
lnc-LETM2-5	MAPK14	0.770281424
lnc-LIPG-2	MAPK14	0.785224803
lnc-LOH12CR1-1	MAPK14	0.74077084
lnc-LRRC38-2	MAPK14	0.751882076
lnc-LSM5-2	MAPK14	0.747721374
lnc-LSS-1	MAPK14	0.74347311
lnc-LUZP1-3	MAPK14	0.875665028
lnc-MACC1-1	MAPK14	0.826885144
lnc-MAFF-6	MAPK14	0.906238648
lnc-MANSC4-2	MAPK14	0.742724429
lnc-MAP6-1	MAPK14	0.778000764
lnc-MARCH4-1	MAPK14	0.785220944
lnc-MDM4-8	MAPK14	0.769740916
lnc-MEP1B-2	MAPK14	0.746366206
lnc-MEST-2	MAPK14	0.761711904
lnc-MFSD2A-1	MAPK14	0.790572906
lnc-MIXL1-2	MAPK14	0.726561959
lnc-MKLN1-1	MAPK14	0.968438024
lnc-MMP23B-3	MAPK14	0.748158623
lnc-MOCS2-3	MAPK14	0.800687891
lnc-MORC2-2	MAPK14	0.730418573
lnc-MPEG1-2	MAPK14	0.792450849
lnc-MPHOSPH10-2	MAPK14	0.768524306
lnc-MPI-1	MAPK14	0.7504837
lnc-MRC2-1	MAPK14	0.716457745
lnc-MRPL40-4	MAPK14	0.8794727
lnc-MRPL47-2	MAPK14	0.736421121
lnc-MRPS11-2	MAPK14	0.967490488
lnc-MRPS16-1	MAPK14	0.719137697
lnc-MRPS24-2	MAPK14	0.929349182
lnc-MRPS27-10	MAPK14	0.902796598
lnc-MTMR2-2	MAPK14	0.781996547
lnc-MYL12A-1	MAPK14	0.805982479
lnc-MYO7B-2	MAPK14	0.863151723
lnc-NAA50-1	MAPK14	0.778234701
lnc-NAA50-3	MAPK14	0.844191962
lnc-NBAS-15	MAPK14	0.721859405
lnc-NBPF15-2	MAPK14	0.757577971
lnc-NDE1-3	MAPK14	0.690357583
lnc-NDUFAF3-1	MAPK14	0.75900124
lnc-NDUFS6-15	MAPK14	0.898371348
lnc-NDUFS6-17	MAPK14	0.775748308
lnc-NEK5-1	MAPK14	0.777932775
lnc-NFAT5-1	MAPK14	0.793301881
lnc-NFKBIB-5	MAPK14	0.753041701
lnc-NIPAL1-2	MAPK14	0.746217719
lnc-NLN-2	MAPK14	-0.690901251
lnc-NLRP2-2	MAPK14	0.787162224
lnc-NLRP3-4	MAPK14	0.745497736
lnc-NR2C2-1	MAPK14	0.931732903
lnc-NRIP2-1	MAPK14	0.850220088
lnc-NSMCE1-1	MAPK14	0.874455725
lnc-NUDT5-1	MAPK14	0.774718517
lnc-NXPH2-3	MAPK14	-0.756514779
lnc-ODF3L2-2	MAPK14	0.779987821
lnc-ODF4-2	MAPK14	0.92867436
lnc-OR7C2-1	MAPK14	0.776961894
lnc-OTP-5	MAPK14	0.748289963
lnc-OXNAD1-6	MAPK14	0.695082564
lnc-PANK3-16	MAPK14	-0.698469864
lnc-PCDH12-1	MAPK14	0.733437444
lnc-PCM1-3	MAPK14	0.797240123
lnc-PDE4D-1	MAPK14	0.706870294
lnc-PDE8A-2	MAPK14	-0.757170365
lnc-PDGFRL-2	MAPK14	0.765619342
lnc-PFKP-16	MAPK14	-0.748077588
lnc-PHRF1-1	MAPK14	0.763792664
lnc-PHYHIP-1	MAPK14	0.780482078
lnc-PIGB-2	MAPK14	0.787695696
lnc-PIGG-2	MAPK14	0.825299021
lnc-PIGY-5	MAPK14	0.867694081
lnc-PINK1-2	MAPK14	0.762460954
lnc-PLCG1-1	MAPK14	0.792209773
lnc-PLXND1-2	MAPK14	0.951850475
lnc-PNLIPRP1-1	MAPK14	0.74572415
lnc-PNMA2-1	MAPK14	0.752817694
lnc-PNO1-1	MAPK14	0.723387097
lnc-POLR1E-4	MAPK14	0.77012752
lnc-POTEM-4	MAPK14	0.724073128
lnc-PPIAL4C-9	MAPK14	0.761875832
lnc-PPP1CB-1	MAPK14	0.747503611
lnc-PPP1R14B-1	MAPK14	0.725165388
lnc-PPP1R3G-3	MAPK14	-0.697373706
lnc-PRDM2-2	MAPK14	0.786558294
lnc-PRDM4-4	MAPK14	0.963946003
lnc-PRKAB2-1	MAPK14	0.732492505
lnc-PRR11-1	MAPK14	0.910146195
lnc-PTGDR2-1	MAPK14	0.766702951
lnc-PTPN6-1	MAPK14	0.878549476
lnc-PURG-1	MAPK14	0.831149711
lnc-PXDC1-12	MAPK14	0.938170755
lnc-RABL2A-5	MAPK14	0.920046875
lnc-RAD9B-1	MAPK14	0.710199427
lnc-RALB-8	MAPK14	0.745629097
lnc-RANBP1-1	MAPK14	0.762536155
lnc-RBM10-1	MAPK14	0.982065099
lnc-RBM26-1	MAPK14	0.776229028
lnc-RC3H1-1	MAPK14	0.785364
lnc-RFXAP-2	MAPK14	0.719702691
lnc-RNF121-5	MAPK14	0.797439119
lnc-RNF125-2	MAPK14	0.723372864
lnc-RNF135-1	MAPK14	0.885500364
lnc-RNF139-2	MAPK14	0.871356204
lnc-RNF24-5	MAPK14	0.756810971
lnc-RP11-116D17.1.1-4	MAPK14	-0.888321526
lnc-RP11-210M15.2.1-6	MAPK14	0.792251488
lnc-RP11-279O9.4.1-1	MAPK14	0.779184943
lnc-RP11-582J16.5.1-4	MAPK14	0.768693949
lnc-RPL30-1	MAPK14	0.911752415
lnc-RPS27L-1	MAPK14	0.811501744
lnc-RSPH1-3	MAPK14	-0.791275162
lnc-RWDD3-1	MAPK14	-0.701899378
lnc-S100A13-1	MAPK14	0.755288317
lnc-SAFB-1	MAPK14	0.751112807
lnc-SCN2A-6	MAPK14	0.794891271
lnc-SDCCAG8-1	MAPK14	0.852974009
lnc-SEBOX-1	MAPK14	0.737003258
lnc-SEPT14-2	MAPK14	0.704167451
lnc-SETD8-1	MAPK14	0.747683153
lnc-SGSH-1	MAPK14	0.879485607
lnc-SH3BGRL2-9	MAPK14	0.778888205
lnc-SH3RF2-1	MAPK14	0.738551246
lnc-SHANK2-3	MAPK14	0.763303582
lnc-SKIV2L2-1	MAPK14	0.710121199
lnc-SLA2-1	MAPK14	0.801008931
lnc-SLC12A2-3	MAPK14	0.725913946
lnc-SLC25A21-4	MAPK14	0.769046217
lnc-SLC25A47-5	MAPK14	0.824008206
lnc-SLC2A6-2	MAPK14	0.799378417
lnc-SLC36A1-5	MAPK14	0.741431963
lnc-SLC38A8-9	MAPK14	0.806555504
lnc-SLC3A2-3	MAPK14	0.72546933
lnc-SLC46A2-1	MAPK14	0.750945987
lnc-SLCO2B1-3	MAPK14	0.813177039
lnc-SLFN12-1	MAPK14	-0.713052913
lnc-SLTM-1	MAPK14	0.695324488
lnc-SNRNP35-1	MAPK14	0.760799977
lnc-SNTG2-3	MAPK14	0.753242229
lnc-SNX20-3	MAPK14	0.700044741
lnc-SP110-5	MAPK14	0.801316284
lnc-SP110-8	MAPK14	0.884498837
lnc-SPATA12-2	MAPK14	0.738040133
lnc-SPIN3-5	MAPK14	0.783880525
lnc-SPPL3.1-3	MAPK14	0.750399412
lnc-SPTBN2-3	MAPK14	0.743928419
lnc-SRSF5-2	MAPK14	0.697709536
lnc-ST7L-1	MAPK14	0.756771422
lnc-STAG3L4-5	MAPK14	0.795617498
lnc-STAP1-12	MAPK14	0.753416845
lnc-SYNE2-1	MAPK14	0.780335194
lnc-TAF13-2	MAPK14	0.772460599
lnc-TAF1D-1	MAPK14	0.781929155
lnc-TATDN1-2	MAPK14	0.826192052
lnc-TBL1XR1-6	MAPK14	-0.780314273
lnc-TBP-3	MAPK14	0.898765468
lnc-TBXAS1-4	MAPK14	0.699004164
lnc-TCF7-4	MAPK14	0.755484023
lnc-TCHP-1	MAPK14	0.878078412
lnc-TEKT1-2	MAPK14	0.82342764
lnc-THRSP-2	MAPK14	0.713692588
lnc-THSD4-4	MAPK14	0.746973959
lnc-TIGD6-1	MAPK14	0.896236369
lnc-TLCD1-3	MAPK14	0.692966809
lnc-TM2D2-1	MAPK14	0.782002778
lnc-TMBIM1-3	MAPK14	0.69105829
lnc-TMC5-1	MAPK14	0.695962561
lnc-TMED5-5	MAPK14	0.769625912
lnc-TMEM123-1	MAPK14	0.72912919
lnc-TMEM156-1	MAPK14	0.799937492
lnc-TMEM161B-4	MAPK14	0.905690381
lnc-TMEM180-3	MAPK14	0.739465003
lnc-TMEM186-1	MAPK14	0.751101957
lnc-TMEM194B-6	MAPK14	0.798116484
lnc-TMEM22-2	MAPK14	0.785648743
lnc-TMEM50B-2	MAPK14	0.738236477
lnc-TMEM75-8	MAPK14	-0.735067201
lnc-TMEM85-2	MAPK14	0.808438771
lnc-TMPRSS2-1	MAPK14	0.745333663
lnc-TNNC2-1	MAPK14	0.829019859
lnc-TOR3A-1	MAPK14	0.89151869
lnc-TSHZ3-2	MAPK14	0.949768735
lnc-TSKS-1	MAPK14	0.955300903
lnc-TSPYL4-1	MAPK14	0.757390126
lnc-TTC23-5	MAPK14	-0.787219104
lnc-TUBB2A-1	MAPK14	0.734753731
lnc-TUBGCP4-1	MAPK14	0.780419091
lnc-TUBGCP6-5	MAPK14	0.786209428
lnc-UGP2-4	MAPK14	0.73237186
lnc-UMODL1-7	MAPK14	0.789166187
lnc-USP50-1	MAPK14	0.745314033
lnc-USPL1-2	MAPK14	-0.757604725
lnc-VN1R2-3	MAPK14	0.76092542
lnc-VRK3-2	MAPK14	0.770466952
lnc-WDPCP-2	MAPK14	0.692361545
lnc-WDR45L-1	MAPK14	0.739862896
lnc-WDR77-2	MAPK14	0.743272226
lnc-WDR81-2	MAPK14	0.73047371
lnc-WNT1-2	MAPK14	0.778412343
lnc-WNT8A-2	MAPK14	0.743814587
lnc-YIF1A-4	MAPK14	0.753145324
lnc-YIF1B-1	MAPK14	0.810751175
lnc-ZBTB25-2	MAPK14	0.779838734
lnc-ZC3H12B-12	MAPK14	0.732833925
lnc-ZCCHC17-7	MAPK14	0.693877967
lnc-ZFP42-2	MAPK14	-0.737130593
lnc-ZFP62-1	MAPK14	0.924878202
lnc-ZNF235-2	MAPK14	0.725712186
lnc-ZNF257-5	MAPK14	0.81007203
lnc-ZNF45-4	MAPK14	0.717205725
lnc-ZNF506-2	MAPK14	0.764297218
lnc-ZNF532-2	MAPK14	0.807991842
lnc-ZNF551-2	MAPK14	0.873192812
lnc-ZNF613-7	MAPK14	0.77628044
lnc-ZNF681-2	MAPK14	0.818836087
lnc-ZNF687-1	MAPK14	0.750794962
lnc-ZNF738-5	MAPK14	0.780278872
lnc-ZNF775-1	MAPK14	0.68769709
lnc-ZNF780B-1	MAPK14	0.79439087
lnc-ZNF788-1	MAPK14	0.738102582
lnc-ZNF792-5	MAPK14	0.889700642
lnc-ZNF804B-1	MAPK14	-0.830042241
lnc-ZNF804B-2	MAPK14	-0.841576534
lnc-ZNF823-2	MAPK14	0.718978486
lnc-ZNF83-6	MAPK14	0.852969599
lnc-ZSCAN21-1	MAPK14	0.71124831
lnc-ZXDA-1	MAPK14	0.735232855
MCCC1-AS1	MAPK14	0.774887314
MTUS2-AS2	MAPK14	-0.773025791
MYCBP2-AS1	MAPK14	0.722584646
MYLK-AS1	MAPK14	0.783911809
NCBP2-AS1	MAPK14	0.784086764
PCF11-AS1	MAPK14	0.805047028
RAP2C-AS1	MAPK14	0.773446655
STARD4-AS1	MAPK14	0.907345987
TH2LCRR	MAPK14	0.735681535
TRG-AS1	MAPK14	0.76413939
TRIM52-AS1	MAPK14	0.694388622
XLOC_000300	MAPK14	0.74752215
XLOC_002818	MAPK14	0.800008664
XLOC_1015300	MAPK14	0.808293954
XLOC_1174717	MAPK14	0.747194407
XLOC_1175427	MAPK14	0.768029593
XLOC_1175795	MAPK14	0.81168115
XLOC_1176009	MAPK14	0.765497723
XLOC_1176066	MAPK14	0.771493865
XLOC_1176366	MAPK14	0.765546978
XLOC_1176619	MAPK14	0.796524003
XLOC_1230810	MAPK14	0.870626734
XLOC_1232514	MAPK14	0.746524418
XLOC_1483332	MAPK14	0.735014795
XLOC_1484828	MAPK14	0.759770725
XLOC_1585064	MAPK14	0.776347476
XLOC_1586489	MAPK14	0.971550805
XLOC_1622484	MAPK14	0.720562777
XLOC_1623353	MAPK14	0.797473213
XLOC_1623935	MAPK14	0.778975029
XLOC_1624910	MAPK14	0.696749278
XLOC_1625271	MAPK14	0.703300332
XLOC_1828067	MAPK14	0.916550501
XLOC_1828250	MAPK14	0.701007815
XLOC_1830773	MAPK14	-0.705243776
XLOC_2028132	MAPK14	-0.742159496
XLOC_2032959	MAPK14	0.935988136
XLOC_2217616	MAPK14	0.786554357
XLOC_2218688	MAPK14	-0.718434402
XLOC_2220896	MAPK14	0.705803132
XLOC_2393336	MAPK14	0.90505676
XLOC_2557495	MAPK14	0.800506248
XLOC_2559906	MAPK14	0.748118654
XLOC_2714423	MAPK14	0.778807969
XLOC_2835378	MAPK14	-0.784647159
XLOC_2840550	MAPK14	0.776280532
XLOC_2993599	MAPK14	-0.706296897
XLOC_375822	MAPK14	0.737564928
XLOC_375823	MAPK14	0.837361708
XLOC_376348	MAPK14	0.780313496
XLOC_379277	MAPK14	-0.950634792
XLOC_514233	MAPK14	0.691126949
XLOC_515583	MAPK14	0.799606685
XLOC_515910	MAPK14	0.763177057
XLOC_516712	MAPK14	0.777918404
XLOC_753553	MAPK14	0.793298584
XLOC_753555	MAPK14	0.78000683
XLOC_754819	MAPK14	0.779138765
XLOC_845645	MAPK14	0.721264988
XLOC_847555	MAPK14	0.760783297
ZNF571-AS1	MAPK14	0.829599348
ZSCAN16-AS1	MAPK14	0.845844203
FAM13A-AS1	FOXM1	-0.686258694
GMDS-AS1	FOXM1	0.812252182
IDI2-AS1	FOXM1	-0.711298069
LINC00115	FOXM1	0.729749956
LINC00237	FOXM1	0.779571238
LINC00390	FOXM1	0.796783065
LINC00431	FOXM1	0.778405954
LINC00466	FOXM1	0.779063245
LINC00475	FOXM1	0.748637802
LINC00943	FOXM1	0.873561084
LINC01016	FOXM1	0.791538749
LINC01146	FOXM1	0.736100399
LINC01224	FOXM1	0.723077148
LINC01270	FOXM1	0.712717403
lnc-AC107021.1-9	FOXM1	0.810313595
lnc-AC114947.1.1-1	FOXM1	-0.729059855
lnc-AC115618.1-1	FOXM1	-0.723700288
lnc-ACP1-3	FOXM1	0.817751991
lnc-AL033381.1-4	FOXM1	0.811226147
lnc-AL391421.1-2	FOXM1	-0.729187631
lnc-ALX4-7	FOXM1	-0.731974314
lnc-APEX1-2	FOXM1	0.818090313
lnc-ATP1B3-2	FOXM1	-0.719896129
lnc-BARHL2-4	FOXM1	0.766964883
lnc-BIRC8-3	FOXM1	-0.74328294
lnc-BMS1-10	FOXM1	0.787515672
lnc-BTLA-4	FOXM1	0.959238754
lnc-C11orf44-8	FOXM1	0.776747179
lnc-C12orf60-2	FOXM1	0.888532757
lnc-C15orf41-11	FOXM1	0.877436577
lnc-C18orf62-1	FOXM1	0.963227259
lnc-C1orf186-3	FOXM1	0.693052155
lnc-C4orf37-2	FOXM1	-0.799102504
lnc-C6orf146-3	FOXM1	0.902631881
lnc-C6orf201-11	FOXM1	0.773221244
lnc-C6orf201-18	FOXM1	0.847011258
lnc-C8orf22-13	FOXM1	0.732396495
lnc-C8orf83-1	FOXM1	0.746615867
lnc-CACNA2D3-2	FOXM1	0.799011303
lnc-CALHM1-1	FOXM1	0.804644965
lnc-CBWD5-2	FOXM1	0.8831726
lnc-CCDC83-1	FOXM1	-0.719561848
lnc-CD72-1	FOXM1	-0.800232847
lnc-CDK1-3	FOXM1	-0.7282176
lnc-CDK12-1	FOXM1	0.760283616
lnc-CDK20-12	FOXM1	-0.771976473
lnc-CDYL2-6	FOXM1	0.751224168
lnc-CHAC2-5	FOXM1	-0.891943688
lnc-CNOT7-1	FOXM1	0.827294587
lnc-COG3-2	FOXM1	-0.816417324
lnc-CRBN-1	FOXM1	0.75615886
lnc-CSNK1A1-1	FOXM1	-0.779718845
lnc-CTA-299D3.8.1-8	FOXM1	0.938170962
lnc-DHX15-1	FOXM1	0.846277619
lnc-DISC1-1	FOXM1	0.79211503
lnc-DNAH5-4	FOXM1	0.817193782
lnc-DNAJA1-2	FOXM1	0.701624351
lnc-DNAJC5B-1	FOXM1	-0.745774257
lnc-ERV3-1-2	FOXM1	0.754748218
lnc-EVX1-15	FOXM1	-0.729460625
lnc-EXOC2-21	FOXM1	0.822032926
lnc-EXOSC6-2	FOXM1	-0.730674204
lnc-FAM110B-11	FOXM1	0.765136282
lnc-FAM110B-12	FOXM1	0.832376037
lnc-FAM138A-3	FOXM1	0.856921639
lnc-FAM161B-2	FOXM1	-0.689812398
lnc-FAM210A-2	FOXM1	-0.71105234
lnc-FBXO2-1	FOXM1	0.708018421
lnc-FGF4-1	FOXM1	0.952309525
lnc-FGFBP1-1	FOXM1	-0.712951243
lnc-GABARAPL2-4	FOXM1	0.951916371
lnc-GLCCI1-1	FOXM1	-0.698108168
lnc-GPRC5D-3	FOXM1	-0.690465126
lnc-GPT2-1	FOXM1	0.78312655
lnc-GRIA3-5	FOXM1	0.785867592
lnc-HAUS5-3	FOXM1	0.945379886
lnc-HDLBP-2	FOXM1	-0.814136715
lnc-HMGB2-1	FOXM1	-0.716836867
lnc-HRASLS-2	FOXM1	0.714558225
lnc-IGFN1-5	FOXM1	0.819144423
lnc-IL17B-5	FOXM1	0.801130947
lnc-IL17RA-13	FOXM1	0.719870926
lnc-KANK3-3	FOXM1	-0.694011203
lnc-KCNJ13-1	FOXM1	-0.769141372
lnc-KHDRBS3-4	FOXM1	0.704927636
lnc-KHDRBS3-9	FOXM1	0.908231113
lnc-KIAA0125-2	FOXM1	0.698470237
lnc-KIAA1644-1	FOXM1	0.763683817
lnc-KNTC1-3	FOXM1	0.899021269
lnc-LEO1-2	FOXM1	-0.710402459
lnc-LEP-1	FOXM1	-0.818167933
lnc-LEPROTL1-9	FOXM1	0.824014469
lnc-LRRC61-5	FOXM1	-0.803479937
lnc-MATN2-1	FOXM1	-0.743118882
lnc-MBTPS2-2	FOXM1	0.85903526
lnc-METRNL-1	FOXM1	0.757489269
lnc-MLLT10-5	FOXM1	0.701459651
lnc-MORC2-5	FOXM1	0.866090922
lnc-MTMR2-1	FOXM1	0.744659698
lnc-MTR-1	FOXM1	0.931822755
lnc-MYB-13	FOXM1	0.853780445
lnc-MYO19-2	FOXM1	0.798210905
lnc-NAALADL2-8	FOXM1	0.710053064
lnc-NAB2-1	FOXM1	0.692220189
lnc-NBN-1	FOXM1	0.858279169
lnc-NBPF15-2	FOXM1	-0.696555587
lnc-NBPF9-4	FOXM1	0.827190252
lnc-NCEH1-1	FOXM1	0.831827713
lnc-NDUFAB1-1	FOXM1	-0.910822282
lnc-NEDD1-8	FOXM1	0.793341822
lnc-NFYB-2	FOXM1	0.951358585
lnc-NQO2-9	FOXM1	0.934104578
lnc-NRIP1-2	FOXM1	0.981743456
lnc-NTF3-3	FOXM1	0.75638311
lnc-NUDT16-1	FOXM1	0.797885158
lnc-OR4F16-3	FOXM1	0.852925489
lnc-OR4F16-8	FOXM1	-0.721109067
lnc-PCK1-4	FOXM1	0.830639435
lnc-PDE8A-2	FOXM1	0.735629087
lnc-PFKFB2-2	FOXM1	-0.788528735
lnc-PHLPP2-1	FOXM1	-0.751631981
lnc-PLA2G7-2	FOXM1	0.780503546
lnc-PLCG1-1	FOXM1	-0.709117949
lnc-POU5F1B-10	FOXM1	0.753770404
lnc-PPIAL4G-5	FOXM1	0.693054343
lnc-PPIAL4G-8	FOXM1	0.797993561
lnc-PRR20A-5	FOXM1	0.695778564
lnc-PSMC3IP-3	FOXM1	-0.834357732
lnc-PTDSS2-1	FOXM1	0.767147802
lnc-PYCARD-1	FOXM1	-0.745651278
lnc-RANBP1-1	FOXM1	-0.718264763
lnc-RD3-5	FOXM1	-0.801735516
lnc-RFC2-5	FOXM1	0.840391151
lnc-RFPL4B-1	FOXM1	0.821624981
lnc-RGS20-1	FOXM1	-0.78525502
lnc-RHBDD3-1	FOXM1	0.834934989
lnc-RMI1-1	FOXM1	-0.875151574
lnc-RNF24-5	FOXM1	-0.71040346
lnc-RP11-173D9.3.1-3	FOXM1	0.771239729
lnc-RP11-404L6.2.1-4	FOXM1	0.810155615
lnc-RP11-796G6.2.1-3	FOXM1	-0.75957841
lnc-RPL19-6	FOXM1	0.823684915
lnc-RPS24-3	FOXM1	0.690251676
lnc-RPS4XP21-1	FOXM1	-0.782292133
lnc-RRP1B-1	FOXM1	0.959061297
lnc-RTN4IP1-2	FOXM1	0.742380168
lnc-RUNDC3B-1	FOXM1	0.864785364
lnc-RWDD3-1	FOXM1	0.722744116
lnc-S100A13-1	FOXM1	-0.700868267
lnc-SAMD5-2	FOXM1	0.74668339
lnc-SAP30-2	FOXM1	0.78740936
lnc-SBDS-4	FOXM1	0.737672333
lnc-SBF2-1	FOXM1	0.788940747
lnc-SDCCAG8-3	FOXM1	-0.762312044
lnc-SLC23A1-1	FOXM1	-0.751491116
lnc-SLFN12-1	FOXM1	0.800230513
lnc-SLMO1-1	FOXM1	-0.765454247
lnc-SMAD4-2	FOXM1	0.786410888
lnc-SNX11-7	FOXM1	0.731518989
lnc-SOD3-1	FOXM1	0.7921752
lnc-SPG11-3	FOXM1	-0.776841959
lnc-SPP1-1	FOXM1	0.837684328
lnc-ST6GAL2-1	FOXM1	0.85562816
lnc-STYX-2	FOXM1	-0.700883912
lnc-SUN5-1	FOXM1	0.923931449
lnc-SYNE2-1	FOXM1	-0.712635342
lnc-TAF9-7	FOXM1	0.77103582
lnc-TAL2-2	FOXM1	0.826817617
lnc-TBCB-1	FOXM1	-0.785350685
lnc-TMEM123-1	FOXM1	-0.699087573
lnc-TMEM132B-9	FOXM1	0.787230118
lnc-TMEM180-3	FOXM1	-0.693099175
lnc-TPCN2-1	FOXM1	-0.698969119
lnc-TRMT11-1	FOXM1	0.701500855
lnc-TTC23-5	FOXM1	0.778142913
lnc-UBE2N-1	FOXM1	0.914697439
lnc-USP47-2	FOXM1	-0.709516102
lnc-VCAN-1	FOXM1	0.880859404
lnc-VPS13D-1	FOXM1	0.817047959
lnc-WBSCR22-4	FOXM1	-0.749926172
lnc-WDR26-1	FOXM1	0.871188209
lnc-WDR27-1	FOXM1	0.838858449
lnc-WDR45L-1	FOXM1	-0.687509637
lnc-WDR81-2	FOXM1	-0.785334368
lnc-WDR86-2	FOXM1	-0.753813407
lnc-YPEL5-1	FOXM1	0.866305259
lnc-ZFP42-2	FOXM1	0.720548556
lnc-ZNF30-1	FOXM1	0.721852787
lnc-ZNF479-1	FOXM1	0.955938778
lnc-ZNF862-1	FOXM1	0.758414719
LUCAT1	FOXM1	0.751937507
MEG3	FOXM1	0.70946306
MIR205HG	FOXM1	0.887616113
MIR4435-2HG	FOXM1	0.686934909
MTUS2-AS2	FOXM1	0.726410744
SATB1-AS1	FOXM1	0.74483586
TMEM9B-AS1	FOXM1	0.712105154
XLOC_000029	FOXM1	0.709289784
XLOC_001052	FOXM1	-0.782451349
XLOC_002503	FOXM1	0.878812025
XLOC_006489	FOXM1	0.745530752
XLOC_1013595	FOXM1	0.776285224
XLOC_1014164	FOXM1	0.751804867
XLOC_1093786	FOXM1	0.897011995
XLOC_1231041	FOXM1	0.686920784
XLOC_1483768	FOXM1	0.784984582
XLOC_1546890	FOXM1	0.767453293
XLOC_1585064	FOXM1	-0.695881038
XLOC_1829856	FOXM1	-0.748729867
XLOC_2217825	FOXM1	0.792466846
XLOC_2218929	FOXM1	-0.824467625
XLOC_2558569	FOXM1	0.815212059
XLOC_2712832	FOXM1	0.936420192
XLOC_2836988	FOXM1	0.686354635
XLOC_2839044	FOXM1	0.741388867
XLOC_2840550	FOXM1	-0.737435734
XLOC_2840602	FOXM1	0.76216476
XLOC_379275	FOXM1	-0.834158718
XLOC_515910	FOXM1	-0.703635185
XLOC_753601	FOXM1	-0.842173563
XLOC_754819	FOXM1	-0.711642365
XLOC_845107	FOXM1	0.692486441
XLOC_931668	FOXM1	0.842511761
XLOC_931842	FOXM1	0.798437759
ZRANB2-AS2	FOXM1	0.888275148
ARSD-AS1	TXN2	0.957376394
B3GALT5-AS1	TXN2	-0.770232705
BIRC6-AS1	TXN2	0.895126877
BOLA3-AS1	TXN2	0.853281539
CASC15	TXN2	-0.936271091
CASK-AS1	TXN2	0.909802442
CFLAR-AS1	TXN2	0.943001322
CNOT10-AS1	TXN2	0.9898007
DANT1	TXN2	-0.782719937
DCTN1-AS1	TXN2	0.741745991
EAF1-AS1	TXN2	0.815479046
EIF1B-AS1	TXN2	0.744586008
EVX1-AS	TXN2	0.882870179
FAM13A-AS1	TXN2	0.908760653
FAM95B1	TXN2	-0.735737574
FLNB-AS1	TXN2	0.702643882
FOXP1-AS1	TXN2	0.767152801
GNAS-AS1	TXN2	-0.704400034
GRTP1-AS1	TXN2	0.887828174
HAGLROS	TXN2	0.789795095
HOXC-AS3	TXN2	-0.763780401
IDH1-AS1	TXN2	0.879325328
IDI2-AS1	TXN2	0.89585278
IGBP1-AS2	TXN2	0.846852854
ITGA9-AS1	TXN2	-0.929127893
KDM4A-AS1	TXN2	0.717908603
LINC-PINT	TXN2	-0.813740702
LINC00115	TXN2	-0.773783772
LINC00237	TXN2	-0.752999625
LINC00431	TXN2	-0.738653474
LINC00620	TXN2	-0.760023529
LINC00649	TXN2	0.762132378
LINC00689	TXN2	0.71505021
LINC00890	TXN2	0.76855381
LINC00959	TXN2	-0.71911652
LINC01039	TXN2	-0.713594467
LINC01091	TXN2	-0.91255207
LINC01224	TXN2	-0.847234892
LINC01297	TXN2	-0.760406948
LINC01359	TXN2	-0.686466753
LIPE-AS1	TXN2	0.700635965
lnc-AARS-1	TXN2	0.980849362
lnc-ABCA5-7	TXN2	0.769089595
lnc-ABCC3-1	TXN2	0.736822795
lnc-ABHD12B-1	TXN2	0.797893787
lnc-AC002553.1-1	TXN2	0.858243338
lnc-AC006050.2.1-6	TXN2	0.890034948
lnc-AC006455.1-12	TXN2	-0.756149119
lnc-AC007390.5.1-1	TXN2	0.816194452
lnc-AC007390.5.1-4	TXN2	0.983711055
lnc-AC008073.6.1-2	TXN2	0.804233414
lnc-AC010336.2-1	TXN2	0.788169674
lnc-AC010872.2.1-2	TXN2	-0.776631307
lnc-AC011443.1-4	TXN2	0.733694697
lnc-AC018816.3.1-11	TXN2	0.969192716
lnc-AC018816.3.1-9	TXN2	0.851180636
lnc-AC027323.1-2	TXN2	0.699242575
lnc-AC079341.1-10	TXN2	0.816250136
lnc-AC087491.2.1-1	TXN2	0.708034265
lnc-AC091132.1-3	TXN2	0.93286464
lnc-AC092295.7.1-2	TXN2	0.748639677
lnc-AC114947.1.1-1	TXN2	0.755607293
lnc-AC115618.1-1	TXN2	0.824262728
lnc-AC127496.3-7	TXN2	0.846623446
lnc-ACP1-3	TXN2	-0.738851372
lnc-ACSBG1-4	TXN2	0.848150961
lnc-ADAM22-2	TXN2	0.689459454
lnc-ADAMTS18-1	TXN2	0.938121607
lnc-ADAMTS18-3	TXN2	0.772712785
lnc-AE000662.92.1-10	TXN2	-0.72070083
lnc-AF127577.1-3	TXN2	0.984695471
lnc-AF131216.6.1-2	TXN2	0.80838681
lnc-AFM-3	TXN2	0.850834484
lnc-AGMAT-4	TXN2	0.852929459
lnc-AGPS-3	TXN2	0.743310207
lnc-AHSA2-5	TXN2	0.713429566
lnc-AIDA-1	TXN2	0.83312148
lnc-AIDA-2	TXN2	0.800803555
lnc-AL901608.1-17	TXN2	-0.792765224
lnc-AL901608.1-3	TXN2	-0.818222153
lnc-ALG3-3	TXN2	0.790045877
lnc-ALPK1-2	TXN2	0.689066592
lnc-ALPK2-6	TXN2	0.955527118
lnc-ALX4-5	TXN2	0.843467146
lnc-ALX4-7	TXN2	0.814061937
lnc-AMDHD1-2	TXN2	0.901858435
lnc-AMDHD1-3	TXN2	0.901142213
lnc-AMDHD1-4	TXN2	0.903009373
lnc-AMDHD2-2	TXN2	0.767158216
lnc-ANGPT2-2	TXN2	0.991693381
lnc-ANGPTL2-1	TXN2	0.987453378
lnc-ANKMY2-1	TXN2	0.82793594
lnc-ANKRD20A2-14	TXN2	0.719137994
lnc-ANKRD27-6	TXN2	0.977874183
lnc-ANKRD30A-5	TXN2	-0.718484887
lnc-ANKS6-1	TXN2	0.862408115
lnc-AP002414.1.1-1	TXN2	0.940045389
lnc-AP005482.1.1-2	TXN2	0.937102828
lnc-AP1S2-1	TXN2	0.909555645
lnc-AP3S1-1	TXN2	0.812936085
lnc-AP3S1-15	TXN2	0.944420359
lnc-AP3S1-4	TXN2	0.957919222
lnc-AP4E1-1	TXN2	0.961451567
lnc-APC-4	TXN2	0.904973701
lnc-APITD1-CORT-1	TXN2	0.823806375
lnc-ARHGAP28-7	TXN2	0.798493072
lnc-ARHGAP32-4	TXN2	0.904942472
lnc-ARHGEF26-3	TXN2	0.867450631
lnc-ARHGEF40-1	TXN2	0.722921458
lnc-ARID5A-2	TXN2	0.747866042
lnc-ARL1-3	TXN2	0.900332383
lnc-ARL13A-1	TXN2	0.843336445
lnc-ARL4D-1	TXN2	0.899746181
lnc-ARMC2-1	TXN2	0.91604857
lnc-ARRDC1-1	TXN2	0.870042067
lnc-ASB5-1	TXN2	0.810584221
lnc-ASCC2-1	TXN2	0.920425119
lnc-ASPRV1-2	TXN2	0.83330359
lnc-ATG10-6	TXN2	0.703997179
lnc-ATG12-5	TXN2	0.700393346
lnc-ATG5-3	TXN2	0.694274959
lnc-ATL1-2	TXN2	0.769927005
lnc-ATM-1	TXN2	0.843786694
lnc-ATM-2	TXN2	0.883520108
lnc-ATP11B-6	TXN2	0.964161086
lnc-ATP6V1C2-2	TXN2	0.8577088
lnc-ATP6V1C2-4	TXN2	0.979195886
lnc-ATP6V1G3-4	TXN2	-0.925025733
lnc-B4GALT7-1	TXN2	0.787765024
lnc-B9D1-1	TXN2	0.922057014
lnc-BASP1-1	TXN2	0.788831823
lnc-BASP1-6	TXN2	0.808439837
lnc-BCL2L13-3	TXN2	0.828353815
lnc-BCL6-9	TXN2	0.760078091
lnc-BDH1-5	TXN2	-0.695455175
lnc-BEAN1-1	TXN2	0.72746787
lnc-BHMT2-4	TXN2	-0.725366169
lnc-BIRC8-3	TXN2	0.732296073
lnc-BLCAP-1	TXN2	-0.865816748
lnc-BLNK-4	TXN2	0.89143402
lnc-BMS1-12	TXN2	-0.802106817
lnc-BRCA1-3	TXN2	0.740136591
lnc-BRD7-3	TXN2	0.779863406
lnc-BRI3-1	TXN2	0.833992985
lnc-BRMS1L-7	TXN2	0.941893261
lnc-BTD-1	TXN2	0.836243362
lnc-C11orf44-8	TXN2	-0.700134896
lnc-C11orf49-3	TXN2	0.974623792
lnc-C12orf40-3	TXN2	0.837338041
lnc-C12orf60-2	TXN2	-0.722400674
lnc-C14orf102-1	TXN2	0.933063428
lnc-C14orf23-2	TXN2	-0.70579814
lnc-C14orf28-2	TXN2	0.932638187
lnc-C16orf58-5	TXN2	0.906448084
lnc-C16orf61-1	TXN2	0.871376582
lnc-C17orf101-3	TXN2	-0.701656964
lnc-C17orf48-1	TXN2	0.870737997
lnc-C18orf42-3	TXN2	0.922630303
lnc-C19orf6-3	TXN2	0.686817003
lnc-C19orf6-5	TXN2	0.838932685
lnc-C19orf71-3	TXN2	0.693228218
lnc-C19orf80-1	TXN2	-0.717113805
lnc-C1orf106-1	TXN2	-0.947801018
lnc-C1orf112-3	TXN2	0.948284398
lnc-C1orf122-1	TXN2	0.707243488
lnc-C1orf132-1	TXN2	-0.7642003
lnc-C1orf201-3	TXN2	0.825992148
lnc-C1orf43-4	TXN2	0.761971359
lnc-C1orf56-1	TXN2	0.841550103
lnc-C1QL3-1	TXN2	0.847789312
lnc-C1S-1	TXN2	0.754173206
lnc-C20orf187-1	TXN2	-0.957697236
lnc-C2CD4A-9	TXN2	0.756698921
lnc-C2orf84-1	TXN2	0.705031216
lnc-C2orf89-2	TXN2	0.861267501
lnc-C3orf17-2	TXN2	0.967339841
lnc-C3orf24-1	TXN2	0.874825339
lnc-C4orf21-1	TXN2	0.903233465
lnc-C4orf34-3	TXN2	0.81803772
lnc-C4orf37-2	TXN2	0.718605233
lnc-C5orf27-4	TXN2	0.720406404
lnc-C5orf32-3	TXN2	0.914375148
lnc-C5orf35-3	TXN2	0.833697869
lnc-C5orf39-1	TXN2	0.732447779
lnc-C5orf39-3	TXN2	0.903846502
lnc-C5orf45-1	TXN2	0.903466976
lnc-C5orf49-1	TXN2	0.840118593
lnc-C6orf105-5	TXN2	0.736726119
lnc-C6orf108-1	TXN2	0.761942865
lnc-C6orf112-8	TXN2	0.775426048
lnc-C6orf146-4	TXN2	0.780039875
lnc-C7orf45-1	TXN2	0.776605165
lnc-C7orf71-4	TXN2	0.880943293
lnc-C8orf42-4	TXN2	0.88085115
lnc-C8orf56-3	TXN2	0.842054034
lnc-C9orf103-7	TXN2	0.908989613
lnc-C9orf152-5	TXN2	0.943056757
lnc-C9orf3-6	TXN2	0.843356632
lnc-C9orf43-1	TXN2	0.772445016
lnc-C9orf57-3	TXN2	0.859418816
lnc-CAMKMT-1	TXN2	-0.775146571
lnc-CAPN2-2	TXN2	0.77705673
lnc-CBR1-1	TXN2	0.929336595
lnc-CBY3-3	TXN2	0.869067297
lnc-CCDC125-22	TXN2	0.874719292
lnc-CCDC148-1	TXN2	0.890121132
lnc-CCDC152-2	TXN2	0.947061995
lnc-CCDC51-1	TXN2	0.85938818
lnc-CCDC68-1	TXN2	0.847100197
lnc-CCDC7-2	TXN2	0.730713047
lnc-CCDC83-1	TXN2	0.908688177
lnc-CCDC85C-2	TXN2	0.71328788
lnc-CCL27-1	TXN2	0.98758909
lnc-CCM2-2	TXN2	0.703943707
lnc-CCNB1IP1-2	TXN2	0.794233424
lnc-CCRN4L-14	TXN2	0.719153202
lnc-CCT6B-4	TXN2	0.779573033
lnc-CD151-2	TXN2	0.984936275
lnc-CD2BP2-1	TXN2	0.747777202
lnc-CD53-2	TXN2	0.923780831
lnc-CDH18-7	TXN2	-0.770376157
lnc-CDK1-3	TXN2	0.735995953
lnc-CDK12-2	TXN2	0.96943968
lnc-CDK20-12	TXN2	0.887776997
lnc-CDK20-4	TXN2	-0.698994584
lnc-CDKL1-1	TXN2	0.851790006
lnc-CELF3-2	TXN2	0.764641401
lnc-CEMP1-10	TXN2	0.876099663
lnc-CHAC1-4	TXN2	0.811150933
lnc-CHADL-3	TXN2	0.962922546
lnc-CHD2-3	TXN2	-0.704297824
lnc-CHMP4C-1	TXN2	0.775757254
lnc-CHRNA3-5	TXN2	0.866042834
lnc-CHRNA4-4	TXN2	-0.741693775
lnc-CHRNA9-2	TXN2	0.90047171
lnc-CHST7-2	TXN2	0.859771609
lnc-CHSY1-6	TXN2	0.941478525
lnc-CIB3-1	TXN2	0.713898156
lnc-CKAP4-1	TXN2	0.704637675
lnc-CKS1B-2	TXN2	0.770805097
lnc-CLASP2-1	TXN2	0.711504456
lnc-CLASP2-5	TXN2	-0.727024045
lnc-CLRN2-1	TXN2	0.847611353
lnc-CNDP1-1	TXN2	0.929029137
lnc-CNIH3-2	TXN2	-0.861108377
lnc-COG3-2	TXN2	0.804129514
lnc-COIL-2	TXN2	0.992146603
lnc-COMMD1-1	TXN2	0.853981417
lnc-COQ9-1	TXN2	0.810417559
lnc-COTL1-2	TXN2	0.857591934
lnc-CPLX1-2	TXN2	0.866436973
lnc-CPLX1-3	TXN2	0.762371878
lnc-CPM-1	TXN2	0.898685187
lnc-CPM-2	TXN2	0.807810562
lnc-CPM-3	TXN2	0.90173603
lnc-CPT2-3	TXN2	0.921555108
lnc-CREG1-2	TXN2	0.859318525
lnc-CREM-6	TXN2	0.891739249
lnc-CRHR1-5	TXN2	0.954540428
lnc-CRHR1-6	TXN2	0.868052332
lnc-CRIPT-1	TXN2	-0.702656431
lnc-CSMD1-18	TXN2	0.831338277
lnc-CSNK1A1-7	TXN2	0.936995979
lnc-CTC-203F4.1.1-3	TXN2	-0.769069384
lnc-CTNS-1	TXN2	0.882258626
lnc-CTRB1-2	TXN2	0.82813781
lnc-CTSZ-7	TXN2	0.890406514
lnc-CYB5D2-2	TXN2	0.939440626
lnc-CYB5R2-3	TXN2	-0.934956872
lnc-CYB5R2-5	TXN2	0.771652022
lnc-CYFIP1-3	TXN2	0.849455698
lnc-CYS1-5	TXN2	0.992615412
lnc-CYTH4-4	TXN2	0.709806283
lnc-DALRD3-1	TXN2	0.849158812
lnc-DBNDD1-1	TXN2	0.881590905
lnc-DDX19B-2	TXN2	0.895423208
lnc-DDX27-3	TXN2	0.867336039
lnc-DENND4C-1	TXN2	0.757100847
lnc-DHX38-4	TXN2	0.691374356
lnc-DKK4-5	TXN2	0.811080633
lnc-DLEU7-5	TXN2	0.897656087
lnc-DNAJA1-1	TXN2	0.906157622
lnc-DNAJA4-1	TXN2	0.81756929
lnc-DNAJC5B-1	TXN2	0.793866639
lnc-DNASE1L1-1	TXN2	0.687237745
lnc-DNASE1L2-1	TXN2	0.913093674
lnc-DONSON-1	TXN2	0.711566202
lnc-DPCD-3	TXN2	0.79391563
lnc-DPP4-2	TXN2	0.709791513
lnc-DR1-1	TXN2	0.832954237
lnc-DSCC1-1	TXN2	0.768652015
lnc-DUSP11-4	TXN2	0.871861253
lnc-DUSP14-4	TXN2	0.716474795
lnc-DUXA-3	TXN2	0.842518487
lnc-DYNC1I1-5	TXN2	0.980145331
lnc-DYSF-12	TXN2	0.88387091
lnc-EBNA1BP2-1	TXN2	0.843447384
lnc-ECHDC3-1	TXN2	0.699915863
lnc-EDC3-5	TXN2	0.774451314
lnc-EEF1A1-1	TXN2	0.971422801
lnc-EEF1B2-2	TXN2	0.820803861
lnc-EEF1B2-3	TXN2	0.970974239
lnc-EGR4-2	TXN2	0.993707566
lnc-EIF2B1-3	TXN2	0.863235327
lnc-ENDOU-1	TXN2	0.825851061
lnc-EPN1-6	TXN2	0.768993948
lnc-EPOR-2	TXN2	0.79610634
lnc-ERICH1-9	TXN2	-0.873078303
lnc-ERP44-1	TXN2	0.909088663
lnc-ESD-1	TXN2	0.877419665
lnc-ETNK2-7	TXN2	0.927273295
lnc-EXOC2-21	TXN2	-0.76028964
lnc-EXOSC6-2	TXN2	0.783006416
lnc-FABP3-1	TXN2	0.886034735
lnc-FABP3-3	TXN2	0.952341694
lnc-FAM102B-2	TXN2	0.972784748
lnc-FAM161B-2	TXN2	0.861168599
lnc-FAM162A-2	TXN2	0.76852723
lnc-FAM164C-2	TXN2	0.921018232
lnc-FAM178A-1	TXN2	0.805098966
lnc-FAM179A-1	TXN2	-0.717426828
lnc-FAM183A-3	TXN2	0.853753626
lnc-FAM198B-1	TXN2	0.899890252
lnc-FAM210A-2	TXN2	0.912963349
lnc-FAM43A-2	TXN2	0.979291404
lnc-FAM72B-2	TXN2	0.839325196
lnc-FAM82A1-10	TXN2	0.962734097
lnc-FAM96B-3	TXN2	0.766483363
lnc-FAT2-1	TXN2	0.964379053
lnc-FDFT1-1	TXN2	0.951150492
lnc-FEM1A-4	TXN2	0.825451674
lnc-FGFBP1-1	TXN2	0.891658758
lnc-FGFR1OP2-1	TXN2	0.732652788
lnc-FIGNL1-1	TXN2	0.771307797
lnc-FKBP2-1	TXN2	0.965999544
lnc-FKRP-1	TXN2	0.699330179
lnc-FMN1-2	TXN2	-0.952186605
lnc-FOXM1-1	TXN2	0.857833037
lnc-FOXN1-1	TXN2	0.949586037
lnc-FREM3-2	TXN2	0.759498773
lnc-FSIP1-1	TXN2	0.862220377
lnc-FTSJ3-1	TXN2	0.791040691
lnc-GADD45A-2	TXN2	0.973708477
lnc-GALNTL2-1	TXN2	-0.69291027
lnc-GAMT-7	TXN2	0.763888342
lnc-GARS-2	TXN2	0.746685373
lnc-GAS8-1	TXN2	-0.69833695
lnc-GATAD2B-1	TXN2	0.700405498
lnc-GCC1-1	TXN2	0.698794977
lnc-GCC2-1	TXN2	0.959739125
lnc-GDI2-1	TXN2	0.769670599
lnc-GGCT-1	TXN2	-0.929318617
lnc-GIP-5	TXN2	0.923918432
lnc-GJA4-2	TXN2	0.80299347
lnc-GK-3	TXN2	0.816980186
lnc-GLCCI1-1	TXN2	0.856268938
lnc-GLDN-2	TXN2	0.840535636
lnc-GLDN-3	TXN2	0.949171031
lnc-GLRX2-1	TXN2	0.915271461
lnc-GLUD1-2	TXN2	0.798120977
lnc-GNG13-5	TXN2	-0.753299322
lnc-GNS-3	TXN2	0.979331777
lnc-GOSR2-2	TXN2	0.853720627
lnc-GPLD1-1	TXN2	0.883590943
lnc-GPR101-3	TXN2	-0.692652236
lnc-GPR126-1	TXN2	0.714273527
lnc-GPR137C-2	TXN2	0.840237258
lnc-GPR160-1	TXN2	0.862351751
lnc-GPR27-5	TXN2	0.85323903
lnc-GPR37L1-2	TXN2	0.722841991
lnc-GPR98-8	TXN2	0.853458667
lnc-GPRC5D-1	TXN2	0.849361005
lnc-GPRC5D-3	TXN2	0.812036736
lnc-GPS1-1	TXN2	0.776769432
lnc-GPT2-1	TXN2	-0.703798865
lnc-GRAMD2-1	TXN2	0.724116185
lnc-GRHL2-14	TXN2	0.794005432
lnc-GRM7-2	TXN2	-0.754296611
lnc-GTF2E2-2	TXN2	0.805441669
lnc-GTPBP1-1	TXN2	0.955507585
lnc-H2AFY2-1	TXN2	0.913632047
lnc-H3F3C-4	TXN2	0.738748598
lnc-HABP4-4	TXN2	0.924725111
lnc-HCN3-1	TXN2	0.857407231
lnc-HDLBP-2	TXN2	0.849560101
lnc-HDLBP-3	TXN2	0.905004873
lnc-HELZ-2	TXN2	0.76782528
lnc-HIP1R-1	TXN2	0.693495689
lnc-HLA-DMA-1	TXN2	0.702192726
lnc-HMBOX1-8	TXN2	0.897296024
lnc-HMGA1-2	TXN2	0.692218819
lnc-HMGB2-1	TXN2	0.869992886
lnc-HOXA13-4	TXN2	0.755833327
lnc-HPGD-2	TXN2	0.701126623
lnc-HSD17B1-2	TXN2	0.693046571
lnc-HSP90AA1-1	TXN2	0.892713118
lnc-HSPB7-1	TXN2	0.76311541
lnc-HSPG2-1	TXN2	0.983633747
lnc-HTRA2-1	TXN2	-0.691982657
lnc-IARS2-2	TXN2	0.907059891
lnc-ID2-1	TXN2	0.93688005
lnc-ID4-2	TXN2	0.95874706
lnc-IFNG-3	TXN2	0.789088801
lnc-IFT46-1	TXN2	0.698591536
lnc-IGFBP7-1	TXN2	0.967421884
lnc-IGFL3-3	TXN2	-0.728893851
lnc-IKBIP-1	TXN2	0.814801819
lnc-IKZF1-2	TXN2	0.727082859
lnc-IKZF2-9	TXN2	0.792605053
lnc-IL12RB1-2	TXN2	0.837077911
lnc-IL2RG-4	TXN2	0.989127015
lnc-IL31RA-1	TXN2	0.967968699
lnc-ILKAP-4	TXN2	0.9604474
lnc-ING1-3	TXN2	0.851938163
lnc-INPPL1-1	TXN2	0.829560377
lnc-INTS12-1	TXN2	0.91350786
lnc-INTS12-2	TXN2	0.804650894
lnc-IQCG-2	TXN2	0.855042443
lnc-IQCG-6	TXN2	0.888414106
lnc-IRAK4-2	TXN2	0.864706286
lnc-IRF1-4	TXN2	0.899540929
lnc-IRF4-6	TXN2	0.733853046
lnc-IRGM-1	TXN2	0.759593568
lnc-JAG1-1	TXN2	0.798660662
lnc-JAG1-6	TXN2	0.764534319
lnc-KANK3-3	TXN2	0.912677563
lnc-KAT8-2	TXN2	0.864979688
lnc-KATNAL2-5	TXN2	0.921476796
lnc-KB-1980E6.3.1-6	TXN2	0.964985046
lnc-KBTBD3-1	TXN2	0.877700421
lnc-KCNH5-3	TXN2	0.871810991
lnc-KCNJ13-1	TXN2	0.697353659
lnc-KCNT1-2	TXN2	0.887602944
lnc-KCTD4-1	TXN2	0.846636633
lnc-KDM3A-1	TXN2	0.772305585
lnc-KDM4C-18	TXN2	0.706212398
lnc-KHDRBS3-4	TXN2	-0.690089244
lnc-KIAA0020-7	TXN2	0.831790221
lnc-KIAA0125-2	TXN2	-0.77598049
lnc-KIAA0196-5	TXN2	0.853017973
lnc-KIAA0319-1	TXN2	0.755444603
lnc-KIAA0564-2	TXN2	0.754241659
lnc-KIAA0664-2	TXN2	0.848591436
lnc-KIAA1147-1	TXN2	0.710932175
lnc-KIAA1429-6	TXN2	0.955405304
lnc-KIAA1609-1	TXN2	0.702783964
lnc-KIAA1731-1	TXN2	0.907528084
lnc-KIF26A-1	TXN2	-0.718527151
lnc-KIF26B-4	TXN2	-0.714794867
lnc-KLHL25-12	TXN2	0.773570125
lnc-KLHL25-6	TXN2	0.849292947
lnc-KLHL31-8	TXN2	0.743142412
lnc-KRBA1-2	TXN2	0.823426354
lnc-KRT80-10	TXN2	0.906338127
lnc-L3MBTL2-1	TXN2	0.756124408
lnc-LAD1-1	TXN2	-0.710634134
lnc-LAT2-2	TXN2	0.973749973
lnc-LEO1-2	TXN2	0.863449876
lnc-LEO1-4	TXN2	0.946494114
lnc-LEPRE1-1	TXN2	0.9511506
lnc-LETM2-2	TXN2	0.830009274
lnc-LETM2-5	TXN2	0.876904047
lnc-LIPG-2	TXN2	0.861950678
lnc-LOH12CR1-1	TXN2	0.896306558
lnc-LOXL1-1	TXN2	0.864138251
lnc-LPIN2-1	TXN2	0.960054218
lnc-LRR1-1	TXN2	0.714795832
lnc-LRRC1-5	TXN2	0.96218013
lnc-LRRC38-2	TXN2	0.930851656
lnc-LRRC57-1	TXN2	0.892302418
lnc-LRRC57-2	TXN2	0.749283364
lnc-LRRFIP2-1	TXN2	0.838068085
lnc-LRRN4-2	TXN2	0.949803298
lnc-LRSAM1-1	TXN2	0.704095501
lnc-LSG1-4	TXN2	0.980020736
lnc-LSM5-2	TXN2	0.882130897
lnc-LSS-1	TXN2	0.849713711
lnc-LTBR-6	TXN2	0.995443097
lnc-LUZP1-3	TXN2	0.829616494
lnc-LXN-1	TXN2	0.975976172
lnc-MACC1-1	TXN2	0.857196732
lnc-MAFF-2	TXN2	0.713242874
lnc-MANSC4-2	TXN2	0.876112995
lnc-MAP4K3-2	TXN2	0.755571013
lnc-MAP6-1	TXN2	0.941878917
lnc-MAPK6-5	TXN2	0.839527463
lnc-MAPK6-8	TXN2	0.837138125
lnc-MARCH10-4	TXN2	-0.690453391
lnc-MARCH4-1	TXN2	0.889758029
lnc-MARCKS-5	TXN2	-0.702288022
lnc-MATN2-1	TXN2	0.789843781
lnc-MBOAT1-13	TXN2	0.707780572
lnc-MDM4-8	TXN2	0.91163082
lnc-MDS2-1	TXN2	-0.707282255
lnc-MEST-2	TXN2	0.830497916
lnc-MFSD2A-1	TXN2	0.737152525
lnc-MFSD4-1	TXN2	0.830908627
lnc-MFSD8-1	TXN2	0.724134217
lnc-MFSD9-4	TXN2	0.960078631
lnc-MIXL1-2	TXN2	0.942597644
lnc-MKLN1-1	TXN2	0.763193648
lnc-MLST8-1	TXN2	0.924917993
lnc-MLX-3	TXN2	0.71093311
lnc-MMP15-1	TXN2	0.974385559
lnc-MMP23B-3	TXN2	0.916794745
lnc-MOCS2-3	TXN2	0.865824449
lnc-MORC2-1	TXN2	0.935409907
lnc-MORC2-2	TXN2	0.701358967
lnc-MPEG1-2	TXN2	0.846472776
lnc-MPHOSPH10-2	TXN2	0.908381026
lnc-MPHOSPH8-4	TXN2	0.776346388
lnc-MPI-1	TXN2	0.910223557
lnc-MPP7-8	TXN2	-0.892287723
lnc-MRC2-1	TXN2	0.735677915
lnc-MRP63-6	TXN2	0.843189559
lnc-MRPL39-20	TXN2	0.833340885
lnc-MRPL40-4	TXN2	0.739774059
lnc-MRPL47-2	TXN2	0.879730496
lnc-MRPL9-2	TXN2	0.818151261
lnc-MRPS11-2	TXN2	0.705636612
lnc-MRPS16-1	TXN2	0.803342245
lnc-MRPS24-2	TXN2	0.770377412
lnc-MRPS27-10	TXN2	0.773879759
lnc-MRTO4-2	TXN2	0.89132839
lnc-MSI2-5	TXN2	0.743765418
lnc-MST1-2	TXN2	0.787647518
lnc-MTIF3-2	TXN2	0.845448257
lnc-MTMR2-1	TXN2	-0.715579838
lnc-MTMR2-2	TXN2	0.833321787
lnc-MTO1-1	TXN2	0.739785807
lnc-MUC20-10	TXN2	0.957518917
lnc-MYL12A-1	TXN2	0.824264455
lnc-MYL4-1	TXN2	0.943330941
lnc-MYL6-2	TXN2	0.786768655
lnc-MYOM1-1	TXN2	0.706539769
lnc-MZT2B-1	TXN2	0.982256709
lnc-NAA50-1	TXN2	0.828532031
lnc-NAA50-3	TXN2	0.874625948
lnc-NAB2-1	TXN2	-0.707885597
lnc-NBAS-15	TXN2	0.761928641
lnc-NBPF15-2	TXN2	0.891190805
lnc-NCOA3-9	TXN2	-0.900390625
lnc-NDE1-3	TXN2	0.963066451
lnc-NDFIP2-13	TXN2	0.907995418
lnc-NDUFAB1-1	TXN2	0.757063134
lnc-NDUFAF2-1	TXN2	0.962560336
lnc-NDUFAF2-2	TXN2	0.699481894
lnc-NDUFAF3-1	TXN2	0.911915863
lnc-NDUFS6-17	TXN2	0.866423394
lnc-NDUFV1-6	TXN2	0.894253625
lnc-NEK5-1	TXN2	0.931817013
lnc-NEMF-1	TXN2	0.77144739
lnc-NEURL2-1	TXN2	0.847338344
lnc-NFAT5-1	TXN2	0.876720672
lnc-NFATC3-1	TXN2	0.72691821
lnc-NFKBIB-5	TXN2	0.833745099
lnc-NID2-5	TXN2	0.868267341
lnc-NIPAL1-2	TXN2	0.909759371
lnc-NIPBL-1	TXN2	0.700893707
lnc-NKX2-5-2	TXN2	0.750597391
lnc-NKX3-1-2	TXN2	0.766227932
lnc-NLN-2	TXN2	-0.707186578
lnc-NLRP2-2	TXN2	0.889979188
lnc-NLRP3-4	TXN2	0.943771015
lnc-NNT-5	TXN2	0.796262804
lnc-NPAS2-2	TXN2	0.843790956
lnc-NPAT-2	TXN2	0.828107161
lnc-NPHS2-3	TXN2	0.973587133
lnc-NR2C2-1	TXN2	0.790964688
lnc-NRIP1-2	TXN2	-0.698158065
lnc-NSMCE1-1	TXN2	0.795399051
lnc-NUDT16-1	TXN2	-0.746115625
lnc-NUDT5-1	TXN2	0.873790296
lnc-NXPH2-3	TXN2	-0.727887947
lnc-OAZ3-6	TXN2	0.939540309
lnc-ODF3L2-2	TXN2	0.762896021
lnc-ODZ1-6	TXN2	0.957076819
lnc-OR4F16-8	TXN2	0.850401679
lnc-OR4M2-12	TXN2	-0.825724259
lnc-OR7C2-1	TXN2	0.844905412
lnc-ORC3-1	TXN2	0.807886873
lnc-ORC3-2	TXN2	0.784814772
lnc-ORC4-1	TXN2	0.968121078
lnc-OSBPL9-3	TXN2	0.764864108
lnc-OTP-5	TXN2	0.935256865
lnc-OTUD6B-1	TXN2	0.890892459
lnc-OTUD6B-2	TXN2	0.902141463
lnc-OXNAD1-6	TXN2	0.766324386
lnc-OXSM-2	TXN2	0.890521273
lnc-P4HA3-1	TXN2	0.761809631
lnc-PABPC1L2B-2	TXN2	0.823382142
lnc-PADI4-2	TXN2	0.797615621
lnc-PAH-3	TXN2	-0.94192432
lnc-PAICS-2	TXN2	0.746002457
lnc-PAPLN-1	TXN2	0.846416016
lnc-PARP2-1	TXN2	0.938621917
lnc-PCDH12-1	TXN2	0.903503112
lnc-PCM1-3	TXN2	0.890136732
lnc-PDE8A-2	TXN2	-0.776590836
lnc-PDGFRL-2	TXN2	0.907920782
lnc-PEA15-1	TXN2	0.723334206
lnc-PEAK1.1-5	TXN2	0.935520927
lnc-PFKP-16	TXN2	-0.751653258
lnc-PHB2-4	TXN2	0.701065837
lnc-PHLDB1-1	TXN2	0.972668568
lnc-PHLPP2-1	TXN2	0.701544889
lnc-PHYHIP-1	TXN2	0.908967753
lnc-PI4KA-2	TXN2	0.976119018
lnc-PIGB-2	TXN2	0.88895868
lnc-PIGG-2	TXN2	0.788729559
lnc-PIGL-1	TXN2	0.95705734
lnc-PIGU-3	TXN2	0.968930507
lnc-PIGY-5	TXN2	0.722203732
lnc-PINK1-2	TXN2	0.922630919
lnc-PLA2G2D-1	TXN2	0.844036511
lnc-PLAC8L1-1	TXN2	0.839739137
lnc-PLAT-4	TXN2	0.692064534
lnc-PLD3-3	TXN2	0.689086015
lnc-PLEKHH1-1	TXN2	0.755781365
lnc-PLXND1-2	TXN2	0.701725728
lnc-PMM2-1	TXN2	0.898562718
lnc-PNLIPRP1-1	TXN2	0.782877739
lnc-PNMA2-1	TXN2	0.882770289
lnc-PNO1-1	TXN2	0.895178744
lnc-POC1B-GALNT4-2	TXN2	0.959718262
lnc-POC5-1	TXN2	0.810950099
lnc-PODXL-3	TXN2	0.824360198
lnc-POLH-1	TXN2	0.95877273
lnc-POLR1E-4	TXN2	0.849474758
lnc-POTEB-5	TXN2	-0.950897062
lnc-POTEM-4	TXN2	0.786251833
lnc-POU5F1B-10	TXN2	-0.741324746
lnc-PPAP2A-1	TXN2	0.947766272
lnc-PPFIA3-2	TXN2	0.770141131
lnc-PPIAL4C-9	TXN2	0.937412646
lnc-PPM1D-1	TXN2	-0.733570615
lnc-PPP1CB-1	TXN2	0.865788938
lnc-PPP1R13B-1	TXN2	0.76674616
lnc-PPP1R14B-1	TXN2	0.951431004
lnc-PPP1R26-1	TXN2	0.997884084
lnc-PPP1R3G-3	TXN2	-0.875259713
lnc-PPP2R5B-4	TXN2	0.778734408
lnc-PPP4C-1	TXN2	0.845598843
lnc-PPP4R1L-1	TXN2	0.773079572
lnc-PRDM2-2	TXN2	0.929898259
lnc-PRDM4-4	TXN2	0.770008791
lnc-PRKAB2-1	TXN2	0.688514392
lnc-PRPF4B-5	TXN2	0.896674047
lnc-PRR15L-2	TXN2	0.751453962
lnc-PRR15L-3	TXN2	0.835937756
lnc-PSMB11-1	TXN2	0.833215747
lnc-PSMC1-1	TXN2	0.996600249
lnc-PSME1-1	TXN2	0.718380761
lnc-PSME4-2	TXN2	0.898269533
lnc-PTDSS1-1	TXN2	0.919189128
lnc-PTGDR2-1	TXN2	0.807255037
lnc-PTGER4-4	TXN2	0.956711753
lnc-PTPLA-2	TXN2	0.84627771
lnc-PTPN2-6	TXN2	0.752549363
lnc-PTPN6-1	TXN2	0.899665398
lnc-PTTG1-6	TXN2	0.691879765
lnc-PUS7-2	TXN2	0.929355064
lnc-PXDC1-12	TXN2	0.769178921
lnc-QDPR-2	TXN2	0.945497855
lnc-RAB17-2	TXN2	0.848296007
lnc-RAB3A-3	TXN2	0.753483761
lnc-RABL2A-5	TXN2	0.78404677
lnc-RAD9B-1	TXN2	0.890342639
lnc-RAI1-1	TXN2	0.953321805
lnc-RANBP1-1	TXN2	0.855066776
lnc-RAPH1-6	TXN2	0.971584424
lnc-RASAL1-1	TXN2	0.930229781
lnc-RB1-2	TXN2	0.97657573
lnc-RC3H1-1	TXN2	0.866749769
lnc-RCAN3-1	TXN2	0.942181525
lnc-RELL2-1	TXN2	0.821546236
lnc-RFC2-4	TXN2	0.699026881
lnc-RFC4-1	TXN2	0.848315614
lnc-RFXAP-2	TXN2	0.918887284
lnc-RGS18-6	TXN2	0.821989982
lnc-RHOC-1	TXN2	0.694784358
lnc-RHOQ-1	TXN2	0.973784371
lnc-RHOQ-2	TXN2	0.978835133
lnc-RIMS3-2	TXN2	0.995287755
lnc-RIMS3-3	TXN2	0.874048647
lnc-RIPK2-2	TXN2	0.962002265
lnc-RLIM-8	TXN2	0.802148685
lnc-RMI1-1	TXN2	0.830650988
lnc-RNF121-5	TXN2	0.829220469
lnc-RNF139-2	TXN2	0.831044653
lnc-RNF146-2	TXN2	0.931580402
lnc-RNF149-2	TXN2	0.943812773
lnc-RNF213-1	TXN2	0.758292024
lnc-RNF24-5	TXN2	0.886252655
lnc-RP11-1012A1.4.1-2	TXN2	0.80471522
lnc-RP11-10A14.4.1-1	TXN2	0.79163839
lnc-RP11-1105G2.3.1-3	TXN2	0.922235396
lnc-RP11-116D17.1.1-10	TXN2	0.985956013
lnc-RP11-116D17.1.1-4	TXN2	-0.695928022
lnc-RP11-180C1.1.1-8	TXN2	-0.694660299
lnc-RP11-181C3.1.1-9	TXN2	0.745365659
lnc-RP11-210M15.2.1-6	TXN2	0.905908956
lnc-RP11-324D17.2.1-3	TXN2	-0.957813681
lnc-RP11-498D10.4.1-1	TXN2	0.68968847
lnc-RP11-582J16.5.1-4	TXN2	0.737241467
lnc-RP11-6F2.7.1-5	TXN2	0.706855542
lnc-RP11-712L6.5.1-3	TXN2	0.983040015
lnc-RP11-796G6.2.1-3	TXN2	0.701337339
lnc-RP3-486B10.1.1-4	TXN2	0.775608162
lnc-RPF1-1	TXN2	0.838937276
lnc-RPL14-2	TXN2	0.816333066
lnc-RPL30-1	TXN2	0.791706089
lnc-RPS24-8	TXN2	0.985451503
lnc-RPS27L-1	TXN2	0.929134345
lnc-RSPH1-3	TXN2	-0.767292229
lnc-RWDD3-1	TXN2	-0.762744654
lnc-S100A13-1	TXN2	0.903956737
lnc-S100A7A-1	TXN2	-0.759564738
lnc-SAA2-2	TXN2	0.925984816
lnc-SAMD5-1	TXN2	-0.697159936
lnc-SAP30-2	TXN2	-0.719024457
lnc-SAR1B-1	TXN2	0.966710708
lnc-SBF2-4	TXN2	0.702643029
lnc-SCN2A-6	TXN2	0.718144788
lnc-SCNN1G-1	TXN2	0.754033727
lnc-SDCCAG8-1	TXN2	0.724704193
lnc-SEBOX-1	TXN2	0.843339872
lnc-SEC22C-2	TXN2	0.956969419
lnc-SEC23A-3	TXN2	0.772448667
lnc-SENP6-12	TXN2	0.846194037
lnc-SEPT10-2	TXN2	0.738316365
lnc-SEPT14-2	TXN2	0.957622649
lnc-SERHL2-7	TXN2	0.964381227
lnc-SERPINB6-1	TXN2	0.74478738
lnc-SERPINE2-1	TXN2	0.910935829
lnc-SETD1B-3	TXN2	0.830632484
lnc-SETD8-1	TXN2	0.837732118
lnc-SGCG-11	TXN2	0.688200999
lnc-SGSH-1	TXN2	0.815024229
lnc-SH2D3A-2	TXN2	0.921878219
lnc-SH2D7-3	TXN2	0.959414075
lnc-SH3BGRL2-9	TXN2	0.875531904
lnc-SH3RF1-2	TXN2	0.978274866
lnc-SH3RF2-1	TXN2	0.915512729
lnc-SHANK2-3	TXN2	0.890224544
lnc-SHARPIN-4	TXN2	0.832619602
lnc-SIRPG-1	TXN2	-0.765513698
lnc-SIVA1-1	TXN2	0.849339177
lnc-SKA2-2	TXN2	0.971493745
lnc-SKIV2L2-1	TXN2	0.940444585
lnc-SLA2-1	TXN2	0.854783037
lnc-SLC12A2-3	TXN2	0.719678478
lnc-SLC16A6-2	TXN2	0.916635801
lnc-SLC22A23-1	TXN2	0.68745343
lnc-SLC24A5-5	TXN2	0.960481975
lnc-SLC25A21-4	TXN2	0.927797171
lnc-SLC25A29-1	TXN2	0.864611227
lnc-SLC25A31-2	TXN2	0.834026609
lnc-SLC25A47-2	TXN2	0.864734038
lnc-SLC25A47-5	TXN2	0.842866561
lnc-SLC2A6-2	TXN2	0.831472473
lnc-SLC35F5-17	TXN2	0.713463899
lnc-SLC36A1-5	TXN2	0.840689041
lnc-SLC38A8-9	TXN2	0.766239082
lnc-SLC39A10-10	TXN2	0.762307485
lnc-SLC39A11-1	TXN2	-0.694969071
lnc-SLC39A6-1	TXN2	0.947088567
lnc-SLC3A2-3	TXN2	0.90042385
lnc-SLC46A2-1	TXN2	0.921834462
lnc-SLFN12-1	TXN2	-0.772019693
lnc-SLMO1-1	TXN2	0.821641664
lnc-SLTM-1	TXN2	0.980865631
lnc-SMARCC2-5	TXN2	0.873717984
lnc-SMCR7-2	TXN2	0.857510101
lnc-SMG1-2	TXN2	0.876514102
lnc-SNAPC2-4	TXN2	0.73804237
lnc-SNRNP35-1	TXN2	0.848342195
lnc-SNTG2-3	TXN2	0.879864531
lnc-SNX20-3	TXN2	0.964900684
lnc-SNX20-5	TXN2	0.898165967
lnc-SNX33-1	TXN2	0.702529436
lnc-SNX33-2	TXN2	0.722024886
lnc-SOX15-1	TXN2	0.779840814
lnc-SP110-5	TXN2	0.83711987
lnc-SPATA12-2	TXN2	0.898305373
lnc-SPERT-4	TXN2	0.97599462
lnc-SPG11-3	TXN2	0.70886808
lnc-SPIN3-5	TXN2	0.88378353
lnc-SPINT2-5	TXN2	-0.693732057
lnc-SPRED2-11	TXN2	0.804857255
lnc-SPRYD3-1	TXN2	0.832250922
lnc-SPTBN2-3	TXN2	0.878352557
lnc-SPTBN4-3	TXN2	0.769833065
lnc-SPTBN5-2	TXN2	0.974367095
lnc-SRPX2-2	TXN2	0.831285446
lnc-SRSF5-2	TXN2	0.824433456
lnc-ST3GAL1-1	TXN2	0.928717256
lnc-ST7L-1	TXN2	0.897002509
lnc-ST7L-3	TXN2	0.815938357
lnc-STAG3L4-5	TXN2	0.842782869
lnc-STAP1-12	TXN2	0.828464313
lnc-STARD9-1	TXN2	0.847623635
lnc-STAT1-1	TXN2	0.9677326
lnc-STYX-2	TXN2	0.80568937
lnc-SUSD1-1	TXN2	-0.961244449
lnc-SUSD5-1	TXN2	0.689211266
lnc-SYNE2-1	TXN2	0.778893658
lnc-SYT15-3	TXN2	0.840031974
lnc-TAF13-2	TXN2	0.777754215
lnc-TAF1A-1	TXN2	0.977685999
lnc-TAF1D-1	TXN2	0.770225401
lnc-TATDN1-2	TXN2	0.858783553
lnc-TBL1XR1-6	TXN2	-0.759113716
lnc-TBP-3	TXN2	0.85314049
lnc-TCF7-4	TXN2	0.783175797
lnc-TCHP-1	TXN2	0.795602717
lnc-TCP1-2	TXN2	0.983627468
lnc-TCTA-1	TXN2	0.736379337
lnc-TEFM-5	TXN2	0.695434393
lnc-TESC-4	TXN2	0.982923622
lnc-TFB2M-1	TXN2	0.909759359
lnc-THBS4-1	TXN2	0.836095448
lnc-THBS4-6	TXN2	0.747077696
lnc-THRSP-2	TXN2	0.970769293
lnc-THSD4-4	TXN2	0.845366781
lnc-TICAM1-1	TXN2	0.970321175
lnc-TIGD1L2-6	TXN2	0.948092808
lnc-TIGD6-1	TXN2	0.780484584
lnc-TLCD1-3	TXN2	0.921920979
lnc-TLE2-1	TXN2	0.727972837
lnc-TM2D2-1	TXN2	0.849501175
lnc-TMC5-1	TXN2	0.873160749
lnc-TMEM123-1	TXN2	0.914644378
lnc-TMEM126B-4	TXN2	-0.792836208
lnc-TMEM138-4	TXN2	0.973753344
lnc-TMEM147-1	TXN2	0.962778882
lnc-TMEM156-1	TXN2	0.812008202
lnc-TMEM164-2	TXN2	0.920656486
lnc-TMEM180-3	TXN2	0.906115967
lnc-TMEM194B-6	TXN2	0.854030548
lnc-TMEM22-2	TXN2	0.809915238
lnc-TMEM27-1	TXN2	0.766161568
lnc-TMEM41B-4	TXN2	0.897510943
lnc-TMEM50B-2	TXN2	0.873233243
lnc-TMEM50B-3	TXN2	0.873596376
lnc-TMEM75-8	TXN2	-0.940213662
lnc-TMEM85-1	TXN2	0.861018907
lnc-TMEM85-2	TXN2	0.835954174
lnc-TMPRSS2-1	TXN2	0.788147205
lnc-TMSB15A-5	TXN2	0.902098132
lnc-TMTC3-14	TXN2	0.912158889
lnc-TMUB2-1	TXN2	0.803917533
lnc-TNFRSF11B-2	TXN2	0.94081777
lnc-TNN-1	TXN2	0.723810999
lnc-TNNC2-1	TXN2	0.693720179
lnc-TNP1-4	TXN2	0.83027708
lnc-TOMM20L-1	TXN2	0.935406179
lnc-TOP1MT-5	TXN2	0.695257631
lnc-TOR1AIP1-1	TXN2	0.715126208
lnc-TOR3A-1	TXN2	0.85573689
lnc-TRAPPC12-1	TXN2	0.812091816
lnc-TRAPPC4-1	TXN2	0.736276046
lnc-TREX1-2	TXN2	0.742674405
lnc-TRIAP1-2	TXN2	0.832796268
lnc-TRIM16-4	TXN2	0.974150526
lnc-TRIP10-4	TXN2	0.9158263
lnc-TRMT1L-2	TXN2	0.994032799
lnc-TRNT1-1	TXN2	0.973164955
lnc-TSC1-1	TXN2	0.752053895
lnc-TSHZ3-2	TXN2	0.814944579
lnc-TSPYL4-1	TXN2	0.89988736
lnc-TTC23-5	TXN2	-0.768676294
lnc-TTC26-4	TXN2	0.911712164
lnc-TUBA1C-3	TXN2	0.698405165
lnc-TUBGCP4-1	TXN2	0.883072428
lnc-TUBGCP6-5	TXN2	0.930205367
lnc-TUFM-1	TXN2	0.701479821
lnc-TULP4-1	TXN2	0.755595053
lnc-TUSC5-5	TXN2	0.833287785
lnc-UBE2B-1	TXN2	0.989687767
lnc-UGP2-4	TXN2	0.937402631
lnc-UMODL1-7	TXN2	0.903039196
lnc-UNC93A-3	TXN2	0.735144601
lnc-URB2-1	TXN2	0.694320873
lnc-USP35-3	TXN2	0.835910828
lnc-USP50-1	TXN2	0.919961087
lnc-USP50-2	TXN2	0.908562165
lnc-USPL1-2	TXN2	-0.796105148
lnc-VAT1-1	TXN2	0.702481302
lnc-VCAN-1	TXN2	-0.75792049
lnc-VMAC-1	TXN2	0.840078658
lnc-VN1R2-3	TXN2	0.874786035
lnc-VN1R2-8	TXN2	0.702027553
lnc-VPS36-2	TXN2	0.758163402
lnc-VPS4B-1	TXN2	0.985413766
lnc-VRK3-2	TXN2	0.887092905
lnc-WBSCR22-4	TXN2	0.730934194
lnc-WDPCP-2	TXN2	0.807732473
lnc-WDR34-2	TXN2	0.804891018
lnc-WDR41-1	TXN2	0.969944115
lnc-WDR45L-1	TXN2	0.933809403
lnc-WDR67-1	TXN2	0.864810067
lnc-WDR73-9	TXN2	0.723901667
lnc-WDR77-2	TXN2	0.856620531
lnc-WDR81-2	TXN2	0.917216103
lnc-WDR86-2	TXN2	0.901078266
lnc-WNT1-2	TXN2	0.845307929
lnc-WNT8A-2	TXN2	0.726258388
lnc-WNT9A-3	TXN2	0.724273429
lnc-WRNIP1-3	TXN2	0.993763901
lnc-XRCC6-1	TXN2	0.699072032
lnc-YIF1A-4	TXN2	0.914709787
lnc-ZBED4-1	TXN2	0.766073015
lnc-ZBTB25-2	TXN2	0.887322023
lnc-ZC3H12B-12	TXN2	0.772680299
lnc-ZCCHC17-7	TXN2	0.715598738
lnc-ZFAND3-4	TXN2	0.836031209
lnc-ZFP42-2	TXN2	-0.780047276
lnc-ZFP62-1	TXN2	0.715204611
lnc-ZFYVE1-1	TXN2	0.890517541
lnc-ZFYVE9-1	TXN2	0.781406004
lnc-ZNF101-4	TXN2	0.760270876
lnc-ZNF177-1	TXN2	0.791566574
lnc-ZNF235-2	TXN2	0.883030277
lnc-ZNF257-5	TXN2	0.810762963
lnc-ZNF394-1	TXN2	0.964590635
lnc-ZNF397-2	TXN2	0.766734115
lnc-ZNF44-1	TXN2	0.842793299
lnc-ZNF445-4	TXN2	0.916845413
lnc-ZNF45-2	TXN2	0.996375041
lnc-ZNF45-4	TXN2	0.830783795
lnc-ZNF460-2	TXN2	0.737779708
lnc-ZNF486-6	TXN2	0.907668637
lnc-ZNF506-2	TXN2	0.846168085
lnc-ZNF514-2	TXN2	0.740629483
lnc-ZNF551-2	TXN2	0.855509658
lnc-ZNF575-1	TXN2	0.826907538
lnc-ZNF582-3	TXN2	0.8473799
lnc-ZNF583-5	TXN2	0.829524733
lnc-ZNF613-7	TXN2	0.865824728
lnc-ZNF639-1	TXN2	-0.732943012
lnc-ZNF681-2	TXN2	0.842199931
lnc-ZNF681-4	TXN2	0.815580214
lnc-ZNF687-1	TXN2	0.914156524
lnc-ZNF701-2	TXN2	0.840317139
lnc-ZNF724P-2	TXN2	-0.708103096
lnc-ZNF738-5	TXN2	0.83783777
lnc-ZNF740-2	TXN2	0.830310779
lnc-ZNF775-1	TXN2	0.936366421
lnc-ZNF780B-1	TXN2	0.737779167
lnc-ZNF791-10	TXN2	0.722929469
lnc-ZNF791-3	TXN2	0.819990596
lnc-ZNF792-5	TXN2	0.90623994
lnc-ZNF804B-1	TXN2	-0.766276147
lnc-ZNF804B-2	TXN2	-0.758982105
lnc-ZNF823-2	TXN2	0.885411432
lnc-ZNF83-4	TXN2	0.80959341
lnc-ZNF83-6	TXN2	0.845180192
lnc-ZNF841-2	TXN2	0.948964122
lnc-ZSCAN2-5	TXN2	0.699631381
lnc-ZSCAN2-6	TXN2	0.974852547
lnc-ZSCAN21-1	TXN2	0.877076391
lnc-ZXDA-1	TXN2	0.73251012
LYPLAL1-AS1	TXN2	0.975393633
MCCC1-AS1	TXN2	0.890632646
MEF2C-AS1	TXN2	-0.909974259
MIR4435-2HG	TXN2	-0.851218982
MTUS2-AS2	TXN2	-0.893122496
MYCBP2-AS1	TXN2	0.912949064
MYLK-AS1	TXN2	0.87280749
NCBP2-AS1	TXN2	0.880437299
OXCT1-AS1	TXN2	0.94995538
PCBP1-AS1	TXN2	0.867440589
PGM5-AS1	TXN2	0.697348316
PITPNA-AS1	TXN2	0.921175755
PLA2G4C-AS1	TXN2	0.9995448
PLCE1-AS2	TXN2	-0.739955908
POTEH-AS1	TXN2	0.972422116
RAP2C-AS1	TXN2	0.915617345
RNF157-AS1	TXN2	0.755686062
RRM1-AS1	TXN2	0.757667654
SBF2-AS1	TXN2	0.790485551
SNAP25-AS1	TXN2	0.760425457
SPAG5-AS1	TXN2	0.781960757
STARD4-AS1	TXN2	0.798135662
SUCLA2-AS1	TXN2	0.741987834
TAB3-AS2	TXN2	0.973324686
TH2LCRR	TXN2	0.834415965
TMEM161B-AS1	TXN2	-0.700392308
TRG-AS1	TXN2	0.875846037
TRIM52-AS1	TXN2	0.691832216
TTC3-AS1	TXN2	0.777471775
UBXN7-AS1	TXN2	0.969670086
XLOC_000108	TXN2	0.937923743
XLOC_000300	TXN2	0.920856668
XLOC_002818	TXN2	0.777692962
XLOC_003475	TXN2	-0.761076662
XLOC_004281	TXN2	0.70602197
XLOC_006489	TXN2	-0.909207766
XLOC_1014164	TXN2	-0.825874041
XLOC_1014170	TXN2	-0.851968387
XLOC_1014483	TXN2	0.888032561
XLOC_1015137	TXN2	0.771499367
XLOC_1015300	TXN2	0.70213715
XLOC_1017529	TXN2	0.919756191
XLOC_1093604	TXN2	0.853461268
XLOC_1093786	TXN2	-0.721333757
XLOC_1093926	TXN2	0.973242561
XLOC_1174083	TXN2	0.826000466
XLOC_1174283	TXN2	0.842282793
XLOC_1174702	TXN2	0.966580394
XLOC_1174715	TXN2	0.774525496
XLOC_1174717	TXN2	0.971768141
XLOC_1174749	TXN2	0.732414352
XLOC_1174819	TXN2	-0.771120808
XLOC_1175427	TXN2	0.904229958
XLOC_1175511	TXN2	0.817233612
XLOC_1175795	TXN2	0.798925244
XLOC_1176009	TXN2	0.863072116
XLOC_1176066	TXN2	0.911201166
XLOC_1176366	TXN2	0.728719814
XLOC_1176581	TXN2	0.910157691
XLOC_1176619	TXN2	0.895554004
XLOC_1176874	TXN2	0.868968376
XLOC_1177405	TXN2	0.971700298
XLOC_1177575	TXN2	0.937976996
XLOC_1178154	TXN2	0.882460333
XLOC_1228939	TXN2	-0.862529148
XLOC_1230085	TXN2	0.785419411
XLOC_1230118	TXN2	0.973151274
XLOC_1230520	TXN2	0.963254657
XLOC_1230810	TXN2	0.808759454
XLOC_1231041	TXN2	-0.700818896
XLOC_1232514	TXN2	0.893428166
XLOC_1233095	TXN2	0.863953733
XLOC_1233735	TXN2	0.766048865
XLOC_1482847	TXN2	0.964485334
XLOC_1483332	TXN2	0.933249528
XLOC_1484827	TXN2	0.810630418
XLOC_1484828	TXN2	0.855613182
XLOC_1547746	TXN2	-0.718448493
XLOC_1585064	TXN2	0.926683466
XLOC_1586489	TXN2	0.697754059
XLOC_1622314	TXN2	0.702586564
XLOC_1622484	TXN2	0.913284467
XLOC_1623353	TXN2	0.843102606
XLOC_1623391	TXN2	0.905353833
XLOC_1624274	TXN2	0.733911204
XLOC_1624910	TXN2	0.816879876
XLOC_1625085	TXN2	0.953199346
XLOC_1625271	TXN2	0.936295493
XLOC_1828024	TXN2	-0.921183902
XLOC_1828067	TXN2	0.784723876
XLOC_1829151	TXN2	0.719584884
XLOC_1829717	TXN2	0.73478275
XLOC_1830341	TXN2	0.702543116
XLOC_1830759	TXN2	-0.731674523
XLOC_1830773	TXN2	-0.948278216
XLOC_1831791	TXN2	0.956871686
XLOC_2028126	TXN2	-0.905509952
XLOC_2028132	TXN2	-0.935921962
XLOC_2028133	TXN2	-0.688145659
XLOC_2030250	TXN2	0.686863478
XLOC_2031508	TXN2	0.740886023
XLOC_2032021	TXN2	0.688843583
XLOC_2032959	TXN2	0.69456711
XLOC_2217240	TXN2	0.7163054
XLOC_2217833	TXN2	0.987531448
XLOC_2218192	TXN2	0.948093043
XLOC_2218688	TXN2	-0.702376653
XLOC_2218929	TXN2	0.787264977
XLOC_2219986	TXN2	0.773345851
XLOC_2220896	TXN2	0.868676234
XLOC_235729	TXN2	0.959025555
XLOC_237626	TXN2	-0.791871642
XLOC_2393128	TXN2	0.777734406
XLOC_2393336	TXN2	0.805571418
XLOC_2393515	TXN2	0.968074988
XLOC_2394463	TXN2	0.749973154
XLOC_2394941	TXN2	0.965981675
XLOC_2395743	TXN2	0.893188297
XLOC_2396092	TXN2	0.740313313
XLOC_2396188	TXN2	-0.82467669
XLOC_2557495	TXN2	0.852565391
XLOC_2558149	TXN2	0.826458877
XLOC_2558461	TXN2	-0.87907509
XLOC_2559125	TXN2	0.771474241
XLOC_2559906	TXN2	0.93778232
XLOC_2560875	TXN2	0.69291969
XLOC_2712257	TXN2	0.949597202
XLOC_2712799	TXN2	0.691879515
XLOC_2712801	TXN2	0.756638944
XLOC_2712832	TXN2	-0.754080592
XLOC_2714423	TXN2	0.849885002
XLOC_2834721	TXN2	-0.923307848
XLOC_2834725	TXN2	-0.872886934
XLOC_2835377	TXN2	-0.915335552
XLOC_2835378	TXN2	-0.74861344
XLOC_2835382	TXN2	-0.699246116
XLOC_2836988	TXN2	-0.894746384
XLOC_2837388	TXN2	-0.78825711
XLOC_2838591	TXN2	0.68944148
XLOC_2839044	TXN2	-0.931463054
XLOC_2839861	TXN2	0.866057421
XLOC_2839990	TXN2	-0.814376328
XLOC_2840072	TXN2	-0.881293508
XLOC_2840550	TXN2	0.871484791
XLOC_2840602	TXN2	-0.898322055
XLOC_2993599	TXN2	-0.853038808
XLOC_375822	TXN2	0.887917067
XLOC_375824	TXN2	0.983048435
XLOC_376248	TXN2	-0.711786168
XLOC_376348	TXN2	0.827197388
XLOC_376899	TXN2	0.978662648
XLOC_378168	TXN2	0.720218967
XLOC_378685	TXN2	0.912471231
XLOC_514233	TXN2	0.954564449
XLOC_514590	TXN2	0.760122934
XLOC_515042	TXN2	0.772255347
XLOC_515249	TXN2	0.966174657
XLOC_515583	TXN2	0.793949701
XLOC_515910	TXN2	0.919721835
XLOC_516712	TXN2	0.834950555
XLOC_651258	TXN2	0.797622799
XLOC_753260	TXN2	0.780674213
XLOC_753553	TXN2	0.883097019
XLOC_753809	TXN2	0.755346588
XLOC_754819	TXN2	0.883729257
XLOC_754873	TXN2	0.861251543
XLOC_845107	TXN2	-0.767168297
XLOC_845645	TXN2	0.925176701
XLOC_846032	TXN2	0.69953154
XLOC_847052	TXN2	0.838474847
XLOC_847150	TXN2	0.72758878
XLOC_847185	TXN2	0.94926317
XLOC_847555	TXN2	0.892726312
XLOC_932070	TXN2	0.861460224
XLOC_932582	TXN2	0.776914287
ZBTB20-AS1	TXN2	0.790092104
ZMYM4-AS1	TXN2	0.803265217
ZNF571-AS1	TXN2	0.786798513
ZSCAN16-AS1	TXN2	0.885649481
lnc-KCNJ12-5	NOX1	0.691774537
ARSD-AS1	GCLC	0.7984008
BOLA3-AS1	GCLC	0.844390254
C15orf59-AS1	GCLC	0.706134374
CASC15	GCLC	-0.687599323
CASK-AS1	GCLC	0.715027191
CFLAR-AS1	GCLC	0.748059323
CNOT10-AS1	GCLC	0.780947615
DCTN1-AS1	GCLC	0.913508785
DLGAP4-AS1	GCLC	0.741937521
DNMBP-AS1	GCLC	0.739244973
EAF1-AS1	GCLC	0.822075722
EIF1B-AS1	GCLC	0.752946828
EVX1-AS	GCLC	0.962179841
FAM13A-AS1	GCLC	0.826297444
FLNB-AS1	GCLC	0.771599521
GRTP1-AS1	GCLC	0.909089477
GTF3C2-AS1	GCLC	0.700482455
HAGLROS	GCLC	0.940366723
IDH1-AS1	GCLC	0.963362458
IDI2-AS1	GCLC	0.686207889
ITGA9-AS1	GCLC	-0.777445609
LINC00890	GCLC	0.755534941
lnc-AARS-1	GCLC	0.777538295
lnc-ABCA5-7	GCLC	0.907787954
lnc-ABCC4-1	GCLC	0.707212599
lnc-ABCD3-1	GCLC	-0.803714043
lnc-ABHD12B-1	GCLC	0.898382126
lnc-AC002553.1-1	GCLC	0.950078187
lnc-AC006050.2.1-6	GCLC	0.942067551
lnc-AC007390.5.1-4	GCLC	0.776132083
lnc-AC008073.6.1-2	GCLC	0.912295087
lnc-AC010336.2-1	GCLC	0.958181839
lnc-AC018816.3.1-11	GCLC	0.885323636
lnc-AC018816.3.1-9	GCLC	0.948481966
lnc-AC079341.1-10	GCLC	0.95207886
lnc-AC091132.1-3	GCLC	0.688279168
lnc-AC092295.7.1-2	GCLC	0.790718522
lnc-AC114947.1.1-1	GCLC	0.765048793
lnc-AC127496.3-6	GCLC	0.723933122
lnc-AC127496.3-7	GCLC	0.961951464
lnc-ACSBG1-4	GCLC	0.86304464
lnc-ACVR2B-1	GCLC	0.78806417
lnc-ADAMTS18-1	GCLC	0.777345545
lnc-ADAMTS18-3	GCLC	0.841657341
lnc-AF127577.1-3	GCLC	0.777141103
lnc-AFM-3	GCLC	0.907091917
lnc-AGMAT-4	GCLC	0.967201754
lnc-AGPS-3	GCLC	0.795261985
lnc-AGRP-7	GCLC	-0.701965917
lnc-AHSA2-5	GCLC	0.806445073
lnc-AIDA-1	GCLC	0.930311132
lnc-AIDA-2	GCLC	0.728077787
lnc-AL136219.1-3	GCLC	0.797826664
lnc-AL590867.1-4	GCLC	0.754473912
lnc-ALG3-1	GCLC	0.710782704
lnc-ALG3-3	GCLC	0.718084447
lnc-ALPK2-6	GCLC	0.760415595
lnc-ALX4-5	GCLC	0.95127335
lnc-AMDHD1-2	GCLC	0.873267203
lnc-AMDHD1-3	GCLC	0.960544562
lnc-AMDHD1-4	GCLC	0.842332802
lnc-AMDHD2-2	GCLC	0.721513065
lnc-AMN-1	GCLC	0.739970978
lnc-ANGPT2-2	GCLC	0.783500333
lnc-ANGPTL2-1	GCLC	0.776854592
lnc-ANKMY2-1	GCLC	0.979281424
lnc-ANKRD20A2-14	GCLC	0.847859394
lnc-ANKRD27-6	GCLC	0.724826505
lnc-ANKS6-1	GCLC	0.956040936
lnc-AP1S2-1	GCLC	0.95062284
lnc-AP3S1-1	GCLC	0.839456844
lnc-AP3S1-15	GCLC	0.920228592
lnc-AP3S1-4	GCLC	0.706384713
lnc-AP4E1-1	GCLC	0.782098839
lnc-APC-4	GCLC	0.943967737
lnc-APITD1-CORT-1	GCLC	0.826656232
lnc-AQP8-1	GCLC	0.712084575
lnc-ARHGAP28-7	GCLC	0.728179919
lnc-ARHGAP32-4	GCLC	0.687459049
lnc-ARHGEF26-3	GCLC	0.824872795
lnc-ARHGEF40-1	GCLC	0.696824498
lnc-ARID5A-2	GCLC	0.89004055
lnc-ARL1-3	GCLC	0.904623302
lnc-ARL4C-2	GCLC	0.897006218
lnc-ARL4D-1	GCLC	0.921510431
lnc-ARMC2-1	GCLC	0.770427457
lnc-ARVCF-4	GCLC	0.690107754
lnc-ASB5-1	GCLC	0.733767325
lnc-ASCC2-1	GCLC	0.906462286
lnc-ATM-1	GCLC	0.989461856
lnc-ATM-2	GCLC	0.691556262
lnc-ATP11B-6	GCLC	0.746461012
lnc-ATP6V1C2-2	GCLC	0.937410371
lnc-ATP6V1C2-4	GCLC	0.782740832
lnc-ATP6V1G3-4	GCLC	-0.710152351
lnc-B4GALT7-1	GCLC	0.917255055
[truncated: 8,033 more rows]
