# Supplementary material for: LncRNAs induce oxidative stress and spermatogenesis by regulating endoplasmic reticulum genes and pathways
Source: Aging (Albany NY). 2021 May 6;13(10):13764–87. doi: 10.18632/aging.202971 (PMC8202879; doi:10.18632/aging.202971)
Supplement: Supplementary Table 13 [file aging-13-202971-s013.csv]

Supplementary Table 13. OT_correlation_network.
Var1	Var2	value
FAM95B1	ADCYAP1R1	0.710471284
GMDS-AS1	ADCYAP1R1	0.807421438
IDI2-AS1	ADCYAP1R1	-0.711561742
LINC00115	ADCYAP1R1	0.803504814
LINC00237	ADCYAP1R1	0.78231357
LINC00390	ADCYAP1R1	0.756860718
LINC00431	ADCYAP1R1	0.733864173
LINC00466	ADCYAP1R1	0.763999723
LINC00475	ADCYAP1R1	0.765162634
LINC00943	ADCYAP1R1	0.872841053
LINC01016	ADCYAP1R1	0.721243235
LINC01039	ADCYAP1R1	0.68858095
LINC01146	ADCYAP1R1	0.721698135
LINC01224	ADCYAP1R1	0.746464557
LINC01270	ADCYAP1R1	0.694115584
LINC01550	ADCYAP1R1	0.690495638
lnc-AC010872.2.1-2	ADCYAP1R1	0.686767432
lnc-AC107021.1-9	ADCYAP1R1	0.816301473
lnc-AC115618.1-1	ADCYAP1R1	-0.709627227
lnc-ACP1-3	ADCYAP1R1	0.772719034
lnc-AL033381.1-4	ADCYAP1R1	0.802246909
lnc-ALX4-7	ADCYAP1R1	-0.751242026
lnc-APEX1-2	ADCYAP1R1	0.803060117
lnc-BARHL2-4	ADCYAP1R1	0.775238399
lnc-BHMT2-4	ADCYAP1R1	0.694820329
lnc-BIRC8-3	ADCYAP1R1	-0.72614582
lnc-BMS1-10	ADCYAP1R1	0.785746623
lnc-BTLA-4	ADCYAP1R1	0.908625227
lnc-C11orf44-8	ADCYAP1R1	0.705187477
lnc-C12orf60-2	ADCYAP1R1	0.841130628
lnc-C15orf41-11	ADCYAP1R1	0.945886823
lnc-C18orf62-1	ADCYAP1R1	0.934390452
lnc-C1orf186-3	ADCYAP1R1	0.80170655
lnc-C4orf37-2	ADCYAP1R1	-0.807307364
lnc-C6orf146-3	ADCYAP1R1	0.862626449
lnc-C6orf201-11	ADCYAP1R1	0.779212961
lnc-C6orf201-18	ADCYAP1R1	0.854442831
lnc-C8orf83-1	ADCYAP1R1	0.718355399
lnc-CACNA2D3-2	ADCYAP1R1	0.777719192
lnc-CALHM1-1	ADCYAP1R1	0.81233193
lnc-CBWD5-2	ADCYAP1R1	0.842528742
lnc-CCDC83-1	ADCYAP1R1	-0.721483515
lnc-CD72-1	ADCYAP1R1	-0.792663852
lnc-CDK1-3	ADCYAP1R1	-0.705914013
lnc-CDK12-1	ADCYAP1R1	0.783439664
lnc-CDK20-12	ADCYAP1R1	-0.780673134
lnc-CDYL2-6	ADCYAP1R1	0.767039505
lnc-CHAC2-5	ADCYAP1R1	-0.851797799
lnc-CNOT7-1	ADCYAP1R1	0.84178595
lnc-COG3-2	ADCYAP1R1	-0.789516547
lnc-CRBN-1	ADCYAP1R1	0.708087519
lnc-CSNK1A1-1	ADCYAP1R1	-0.790134948
lnc-CTA-299D3.8.1-8	ADCYAP1R1	0.894682248
lnc-DHX15-1	ADCYAP1R1	0.852708063
lnc-DISC1-1	ADCYAP1R1	0.805939217
lnc-DNAH5-4	ADCYAP1R1	0.785561732
lnc-DNAJA1-2	ADCYAP1R1	0.805470777
lnc-DNAJC5B-1	ADCYAP1R1	-0.742775032
lnc-EIF2B1-3	ADCYAP1R1	-0.690243278
lnc-ERV3-1-2	ADCYAP1R1	0.753976398
lnc-EXOC2-21	ADCYAP1R1	0.836438376
lnc-EXOSC6-2	ADCYAP1R1	-0.716895229
lnc-FAM110B-11	ADCYAP1R1	0.777399039
lnc-FAM110B-12	ADCYAP1R1	0.818411175
lnc-FAM138A-3	ADCYAP1R1	0.852653439
lnc-FAM210A-2	ADCYAP1R1	-0.715990547
lnc-FGF4-1	ADCYAP1R1	0.890901684
lnc-FGFBP1-1	ADCYAP1R1	-0.712933621
lnc-GABARAPL2-4	ADCYAP1R1	0.91191841
lnc-GLCCI1-1	ADCYAP1R1	-0.696865623
lnc-GLDN-3	ADCYAP1R1	-0.687630817
lnc-GPRC5D-3	ADCYAP1R1	-0.691505457
lnc-GPT2-1	ADCYAP1R1	0.740541784
lnc-GRIA3-5	ADCYAP1R1	0.838445369
lnc-HAUS5-3	ADCYAP1R1	0.871370692
lnc-HDLBP-2	ADCYAP1R1	-0.801274441
lnc-HMGB2-1	ADCYAP1R1	-0.721694535
lnc-HRASLS-2	ADCYAP1R1	0.687236672
lnc-IGFN1-5	ADCYAP1R1	0.764538151
lnc-IL17B-5	ADCYAP1R1	0.873983719
lnc-KANK3-3	ADCYAP1R1	-0.691615958
lnc-KCNJ13-1	ADCYAP1R1	-0.744474457
lnc-KHDRBS3-4	ADCYAP1R1	0.809380927
lnc-KHDRBS3-9	ADCYAP1R1	0.887837072
lnc-KIAA0125-2	ADCYAP1R1	0.700028013
lnc-KIAA1644-1	ADCYAP1R1	0.758493581
lnc-KNTC1-3	ADCYAP1R1	0.891253303
lnc-LEO1-2	ADCYAP1R1	-0.713576615
lnc-LEP-1	ADCYAP1R1	-0.819079096
lnc-LEPROTL1-9	ADCYAP1R1	0.822234009
lnc-LRRC61-5	ADCYAP1R1	-0.757021565
lnc-MBTPS2-2	ADCYAP1R1	0.89039013
lnc-METRNL-1	ADCYAP1R1	0.730869064
lnc-MORC2-5	ADCYAP1R1	0.84429405
lnc-MTMR2-1	ADCYAP1R1	0.751701338
lnc-MTR-1	ADCYAP1R1	0.910096721
lnc-MYB-13	ADCYAP1R1	0.816784521
lnc-MYO19-2	ADCYAP1R1	0.793159952
lnc-NAALADL2-8	ADCYAP1R1	0.711766339
lnc-NAB2-1	ADCYAP1R1	0.717180202
lnc-NBN-1	ADCYAP1R1	0.865703094
lnc-NBPF15-2	ADCYAP1R1	-0.70050446
lnc-NBPF9-4	ADCYAP1R1	0.850461819
lnc-NCEH1-1	ADCYAP1R1	0.803646821
lnc-NDUFAB1-1	ADCYAP1R1	-0.899561053
lnc-NEDD1-8	ADCYAP1R1	0.804967754
lnc-NFYB-2	ADCYAP1R1	0.923849996
lnc-NQO2-9	ADCYAP1R1	0.899978708
lnc-NRIP1-2	ADCYAP1R1	0.957162665
lnc-NTF3-3	ADCYAP1R1	0.691027245
lnc-NUDT16-1	ADCYAP1R1	0.77861742
lnc-OR4F16-3	ADCYAP1R1	0.810186532
lnc-OR4F16-8	ADCYAP1R1	-0.720895647
lnc-PCK1-4	ADCYAP1R1	0.812275238
lnc-PDE8A-2	ADCYAP1R1	0.723487275
lnc-PHLPP2-1	ADCYAP1R1	-0.750586586
lnc-PLA2G7-2	ADCYAP1R1	0.779179824
lnc-PLCG1-1	ADCYAP1R1	-0.686818226
lnc-POU5F1B-10	ADCYAP1R1	0.755467167
lnc-PPIAL4G-8	ADCYAP1R1	0.806302121
lnc-PSMC3IP-3	ADCYAP1R1	-0.801558019
lnc-PTDSS2-1	ADCYAP1R1	0.763181934
lnc-PYCARD-1	ADCYAP1R1	-0.714451171
lnc-RANBP1-1	ADCYAP1R1	-0.723721904
lnc-RD3-5	ADCYAP1R1	-0.798600766
lnc-RFC2-5	ADCYAP1R1	0.823661879
lnc-RFPL4B-1	ADCYAP1R1	0.787376697
lnc-RHBDD3-1	ADCYAP1R1	0.835560105
lnc-RMI1-1	ADCYAP1R1	-0.839042477
lnc-RNF24-5	ADCYAP1R1	-0.717798674
lnc-RP11-173D9.3.1-3	ADCYAP1R1	0.753330649
lnc-RP11-324D17.2.1-3	ADCYAP1R1	0.693136093
lnc-RP11-404L6.2.1-4	ADCYAP1R1	0.800027896
lnc-RP11-796G6.2.1-3	ADCYAP1R1	-0.765750924
lnc-RPL19-6	ADCYAP1R1	0.800085177
lnc-RPS4XP21-1	ADCYAP1R1	-0.776312756
lnc-RRP1B-1	ADCYAP1R1	0.953934058
lnc-RTN4IP1-2	ADCYAP1R1	0.764065623
lnc-RUNDC3B-1	ADCYAP1R1	0.85993857
lnc-RWDD3-1	ADCYAP1R1	0.698751041
lnc-S100A13-1	ADCYAP1R1	-0.707088727
lnc-SAMD5-2	ADCYAP1R1	0.736928856
lnc-SAP30-2	ADCYAP1R1	0.792713911
lnc-SBDS-4	ADCYAP1R1	0.746840116
lnc-SBF2-1	ADCYAP1R1	0.784294238
lnc-SDCCAG8-3	ADCYAP1R1	-0.765617636
lnc-SLFN12-1	ADCYAP1R1	0.802636424
lnc-SLMO1-1	ADCYAP1R1	-0.808824524
lnc-SMAD4-2	ADCYAP1R1	0.776339561
lnc-SNX11-7	ADCYAP1R1	0.732398022
lnc-SOD3-1	ADCYAP1R1	0.813528612
lnc-SPG11-3	ADCYAP1R1	-0.726443229
lnc-SPP1-1	ADCYAP1R1	0.83136428
lnc-ST6GAL2-1	ADCYAP1R1	0.837911935
lnc-SUN5-1	ADCYAP1R1	0.872350364
lnc-SYNE2-1	ADCYAP1R1	-0.715891071
lnc-TAF9-7	ADCYAP1R1	0.819652534
lnc-TAL2-2	ADCYAP1R1	0.807674359
lnc-TBCB-1	ADCYAP1R1	-0.724355335
lnc-TMEM123-1	ADCYAP1R1	-0.697767563
lnc-TMEM132B-9	ADCYAP1R1	0.764674423
lnc-TPCN2-1	ADCYAP1R1	-0.71262942
lnc-TTC23-5	ADCYAP1R1	0.749206264
lnc-UBE2N-1	ADCYAP1R1	0.915664618
lnc-VCAN-1	ADCYAP1R1	0.87014883
lnc-VPS13D-1	ADCYAP1R1	0.801087625
lnc-WBSCR22-4	ADCYAP1R1	-0.749486816
lnc-WDR26-1	ADCYAP1R1	0.856997395
lnc-WDR27-1	ADCYAP1R1	0.832271619
lnc-WDR45L-1	ADCYAP1R1	-0.696232249
lnc-WDR81-2	ADCYAP1R1	-0.783807777
lnc-WDR86-2	ADCYAP1R1	-0.757070245
lnc-YPEL5-1	ADCYAP1R1	0.843432821
lnc-ZFP42-2	ADCYAP1R1	0.732847465
lnc-ZNF30-1	ADCYAP1R1	0.701206064
lnc-ZNF479-1	ADCYAP1R1	0.919979375
lnc-ZNF862-1	ADCYAP1R1	0.778131465
LUCAT1	ADCYAP1R1	0.745920911
MEG3	ADCYAP1R1	0.715299452
MIR205HG	ADCYAP1R1	0.899807677
MIR4435-2HG	ADCYAP1R1	0.696708896
MTUS2-AS2	ADCYAP1R1	0.705264409
SATB1-AS1	ADCYAP1R1	0.723960016
TMEM9B-AS1	ADCYAP1R1	0.726001528
XLOC_000029	ADCYAP1R1	0.72775902
XLOC_001052	ADCYAP1R1	-0.762241342
XLOC_002503	ADCYAP1R1	0.928359493
XLOC_006489	ADCYAP1R1	0.758478201
XLOC_1013595	ADCYAP1R1	0.784407388
XLOC_1014164	ADCYAP1R1	0.779146678
XLOC_1093786	ADCYAP1R1	0.840253953
XLOC_1174717	ADCYAP1R1	-0.690088932
XLOC_1176874	ADCYAP1R1	-0.733840121
XLOC_1483768	ADCYAP1R1	0.811159157
XLOC_1546890	ADCYAP1R1	0.744760021
XLOC_1585064	ADCYAP1R1	-0.702881403
XLOC_1829856	ADCYAP1R1	-0.752792385
XLOC_2217825	ADCYAP1R1	0.767457997
XLOC_2218929	ADCYAP1R1	-0.829233566
XLOC_2558569	ADCYAP1R1	0.804328052
XLOC_2712832	ADCYAP1R1	0.937835702
XLOC_2836988	ADCYAP1R1	0.693538891
XLOC_2839044	ADCYAP1R1	0.756553192
XLOC_2840550	ADCYAP1R1	-0.73297782
XLOC_2840602	ADCYAP1R1	0.750968943
XLOC_379275	ADCYAP1R1	-0.837882688
XLOC_515910	ADCYAP1R1	-0.701556844
XLOC_753601	ADCYAP1R1	-0.779326345
XLOC_754819	ADCYAP1R1	-0.711473566
XLOC_931668	ADCYAP1R1	0.86627671
XLOC_931842	ADCYAP1R1	0.781501145
ZRANB2-AS2	ADCYAP1R1	0.863708482
ADIRF-AS1	HOXA11	0.922047056
ATP6V0E2-AS1	HOXA11	0.961019858
CARS-AS1	HOXA11	0.785322008
CCDC144NL-AS1	HOXA11	0.893557176
CHKB-AS1	HOXA11	-0.8457738
COX10-AS1	HOXA11	-0.687691358
DLG5-AS1	HOXA11	0.701092152
EAF1-AS1	HOXA11	0.697041565
EIF1B-AS1	HOXA11	0.806815155
FARP1-AS1	HOXA11	0.868391286
FARSA-AS1	HOXA11	0.871603226
FLNB-AS1	HOXA11	0.874942549
GNAS-AS1	HOXA11	-0.703962051
GTF3C2-AS1	HOXA11	0.8116962
H1FX-AS1	HOXA11	0.756595636
KDM4A-AS1	HOXA11	0.723630894
LAMTOR5-AS1	HOXA11	0.896144054
LIMD1-AS1	HOXA11	0.900373396
LINC00094	HOXA11	0.934964888
LINC00526	HOXA11	0.835799115
LINC00649	HOXA11	0.786779647
LINC00847	HOXA11	0.975463391
LINC00894	HOXA11	0.990089013
LINC00905	HOXA11	-0.856463975
LINC00959	HOXA11	-0.782293729
LINC01102	HOXA11	-0.812614805
LINC01606	HOXA11	-0.758525907
lnc-A1BG-3	HOXA11	0.785903717
lnc-ABAT-3	HOXA11	0.857705482
lnc-ABCC3-1	HOXA11	0.776384947
lnc-AC011239.1.1-6	HOXA11	-0.877155387
lnc-AC011443.1-4	HOXA11	0.766665851
lnc-AC040934.1-3	HOXA11	0.877177123
lnc-AC074212.3.1-1	HOXA11	0.876471971
lnc-AC084851.1-9	HOXA11	0.870885607
lnc-AC127496.3-6	HOXA11	0.702505134
lnc-ADAM22-2	HOXA11	0.765062828
lnc-ADAMTS18-3	HOXA11	0.802081859
lnc-ADCK3-1	HOXA11	0.904312906
lnc-AGPS-3	HOXA11	0.703390196
lnc-AGRP-7	HOXA11	-0.846239061
lnc-AHSA2-5	HOXA11	0.768048342
lnc-ALG2-6	HOXA11	-0.807743903
lnc-ALPK1-2	HOXA11	0.839206998
lnc-ALPK2-4	HOXA11	0.931011512
lnc-AMDHD2-2	HOXA11	0.721585952
lnc-AMN-1	HOXA11	0.864584402
lnc-AMN-3	HOXA11	0.88524181
lnc-ANGPTL6-1	HOXA11	0.88801563
lnc-AP3S1-6	HOXA11	0.920530774
lnc-APITD1-CORT-1	HOXA11	0.771347467
lnc-ARHGAP26-4	HOXA11	-0.717161482
lnc-ARHGAP28-7	HOXA11	0.751226469
lnc-ARHGEF38-1	HOXA11	0.900997097
lnc-ARHGEF40-1	HOXA11	0.697878112
lnc-ARID5A-2	HOXA11	0.704614692
lnc-ARL16-1	HOXA11	0.89021006
lnc-ARMC6-1	HOXA11	0.843595782
lnc-ARMC7-1	HOXA11	0.861387722
lnc-ARVCF-4	HOXA11	0.898948215
lnc-ASH2L-1	HOXA11	0.823203043
lnc-ATF7IP2-1	HOXA11	0.803967915
lnc-ATG10-6	HOXA11	0.911462223
lnc-ATG12-5	HOXA11	0.83960908
lnc-ATG5-3	HOXA11	0.762076523
lnc-ATP2C2-1	HOXA11	0.873134657
lnc-ATPAF2-2	HOXA11	0.963161176
lnc-ATPIF1-2	HOXA11	0.874989603
lnc-B3GAT1-2	HOXA11	-0.820126856
lnc-B4GALT3-1	HOXA11	0.860458875
lnc-BEAN1-1	HOXA11	0.746355672
lnc-BLID-7	HOXA11	0.852803805
lnc-BLK-2	HOXA11	0.8653699
lnc-BNIP2-2	HOXA11	-0.873719706
lnc-BPHL-9	HOXA11	0.948203208
lnc-BRAT1-2	HOXA11	0.904147466
lnc-BTBD10-8	HOXA11	0.749585279
lnc-BTBD6-1	HOXA11	0.912510475
lnc-BTG2-3	HOXA11	0.889614884
lnc-C11orf41-1	HOXA11	0.83537036
lnc-C11orf74-7	HOXA11	-0.827247062
lnc-C12orf23-1	HOXA11	0.780975943
lnc-C14orf23-2	HOXA11	-0.81809979
lnc-C15orf32-3	HOXA11	0.990229218
lnc-C16orf62-1	HOXA11	0.835520742
lnc-C16orf72-12	HOXA11	-0.829593951
lnc-C17orf63-2	HOXA11	0.786164973
lnc-C17orf97-5	HOXA11	0.941699497
lnc-C19orf6-3	HOXA11	0.862022075
lnc-C19orf68-4	HOXA11	0.780994938
lnc-C1orf122-2	HOXA11	0.80410496
lnc-C1orf123-1	HOXA11	0.878838739
lnc-C1orf167-2	HOXA11	0.924685836
lnc-C1orf177-2	HOXA11	0.937875135
lnc-C1orf201-3	HOXA11	0.781522388
lnc-C1orf201-5	HOXA11	0.692833645
lnc-C1orf43-3	HOXA11	0.919630624
lnc-C1orf85-1	HOXA11	0.909020973
lnc-C1QBP-1	HOXA11	0.866973989
lnc-C1QTNF5-1	HOXA11	0.688878777
lnc-C20orf96-3	HOXA11	0.694995624
lnc-C2orf18-1	HOXA11	-0.853454737
lnc-C3orf23-2	HOXA11	0.877816558
lnc-C5orf25-1	HOXA11	0.82845741
lnc-C5orf45-1	HOXA11	0.690369344
lnc-C5orf63-2	HOXA11	0.861012712
lnc-C6orf108-1	HOXA11	0.691846424
lnc-C6orf164-2	HOXA11	-0.786480381
lnc-C6orf99-7	HOXA11	0.919202865
lnc-C7orf10-4	HOXA11	0.799908309
lnc-C8orf48-7	HOXA11	-0.844306786
lnc-C8orf56-3	HOXA11	0.697464995
lnc-C9orf43-1	HOXA11	0.716144729
lnc-CASKIN2-1	HOXA11	0.912833794
lnc-CCDC127-2	HOXA11	-0.778555774
lnc-CCDC159-1	HOXA11	0.890845094
lnc-CCDC159-4	HOXA11	0.841449953
lnc-CCDC23-1	HOXA11	0.783261507
lnc-CCDC7-2	HOXA11	0.870871624
lnc-CCT6B-4	HOXA11	0.736638246
lnc-CD226-5	HOXA11	-0.825802642
lnc-CD37-1	HOXA11	0.876703961
lnc-CDH11-2	HOXA11	-0.786973307
lnc-CDIPT-1	HOXA11	0.727845583
lnc-CDR2-1	HOXA11	0.833983253
lnc-CDYL-10	HOXA11	-0.847892559
lnc-CEBPG-4	HOXA11	0.890028217
lnc-CELF3-2	HOXA11	0.817302728
lnc-CENPT-1	HOXA11	0.866764566
lnc-CHAD-3	HOXA11	0.796597559
lnc-CHADL-1	HOXA11	0.846244712
lnc-CHRAC1-7	HOXA11	0.787010399
lnc-CHRNA5-3	HOXA11	-0.843694874
lnc-CIB3-1	HOXA11	0.93687211
lnc-CLASP2-1	HOXA11	0.915698048
lnc-CLDN6-4	HOXA11	0.705497901
lnc-CLLU1.1-1	HOXA11	-0.787229277
lnc-CLVS1-1	HOXA11	-0.729231585
lnc-CMBL-5	HOXA11	0.908482069
lnc-COBL-2	HOXA11	-0.861317253
lnc-COL28A1-1	HOXA11	0.884103072
lnc-COL4A4-2	HOXA11	-0.748761149
lnc-COMMD5-1	HOXA11	0.891298455
lnc-CPLX1-3	HOXA11	0.756927327
lnc-CPNE5-1	HOXA11	-0.816328946
lnc-CSNK1G2-4	HOXA11	0.873791994
lnc-CTRL-2	HOXA11	0.905330493
lnc-CXCL16-1	HOXA11	0.870865963
lnc-CYB5R2-5	HOXA11	0.728038143
lnc-CYP2C18-1	HOXA11	-0.846010903
lnc-DALRD3-2	HOXA11	0.952257425
lnc-DAPP1-1	HOXA11	0.912662898
lnc-DCAF6-1	HOXA11	0.734579703
lnc-DDHD2-1	HOXA11	0.763791698
lnc-DDX54-1	HOXA11	0.783144002
lnc-DEGS2-6	HOXA11	0.892246463
lnc-DHRS7B-1	HOXA11	-0.871451378
lnc-DHRS7B-3	HOXA11	0.86674691
lnc-DHX36-3	HOXA11	0.84144926
lnc-DKK4-5	HOXA11	0.773424135
lnc-DNASE1L1-1	HOXA11	0.689123688
lnc-DONSON-1	HOXA11	0.812065168
lnc-DPP4-2	HOXA11	0.823772383
lnc-DSCC1-1	HOXA11	0.744596732
lnc-DTHD1-5	HOXA11	-0.873023888
lnc-DUSP11-3	HOXA11	0.829943664
lnc-DUXA-1	HOXA11	0.86348076
lnc-DUXA-3	HOXA11	0.690677973
lnc-EDC3-5	HOXA11	0.707191445
lnc-EEF1B2-1	HOXA11	0.920371404
lnc-EHBP1-1	HOXA11	-0.75838871
lnc-EIF2AK4-3	HOXA11	0.884476844
lnc-EIF2C2-2	HOXA11	-0.810503141
lnc-ENTPD5-5	HOXA11	0.984156171
lnc-EPHB6-1	HOXA11	0.880316518
lnc-ERAL1-3	HOXA11	0.848912525
lnc-ESCO2-1	HOXA11	0.753012857
lnc-ESPN-3	HOXA11	0.848266621
lnc-EXOC3-3	HOXA11	0.85546314
lnc-F8-1	HOXA11	0.912493802
lnc-FAM117A-1	HOXA11	0.911942948
lnc-FAM120B-3	HOXA11	-0.892829863
lnc-FAM135A-2	HOXA11	0.717309517
lnc-FAM161B-1	HOXA11	0.821903392
lnc-FAM162A-2	HOXA11	0.699381579
lnc-FAM190B-4	HOXA11	-0.866209758
lnc-FAM196A-1	HOXA11	0.858393168
lnc-FAM57A-3	HOXA11	0.869981584
lnc-FAM59B-3	HOXA11	0.779842975
lnc-FAM78A-3	HOXA11	0.882443481
lnc-FAM8A1-2	HOXA11	0.917233098
lnc-FBN1-3	HOXA11	0.901740063
lnc-FBXL22-1	HOXA11	0.728621122
lnc-FBXO34-5	HOXA11	-0.818897233
lnc-FBXO47-1	HOXA11	0.865788331
lnc-FEM1A-4	HOXA11	0.715740978
lnc-FER-1	HOXA11	0.868081531
lnc-FEZ1-2	HOXA11	0.88340102
lnc-FGF21-2	HOXA11	0.875597446
lnc-FIGNL1-1	HOXA11	0.720886979
lnc-FKBP8-1	HOXA11	0.900249643
lnc-FKRP-1	HOXA11	0.701875348
lnc-FLII-1	HOXA11	0.797280568
lnc-FN1-4	HOXA11	0.813044337
lnc-FOXA3-1	HOXA11	0.854371371
lnc-FOXK2-3	HOXA11	0.901960015
lnc-FPR2-1	HOXA11	-0.862513193
lnc-FRAT1-2	HOXA11	0.915302519
lnc-FRMD1-8	HOXA11	0.868562455
lnc-FSCN1-2	HOXA11	0.869903051
lnc-FSCN2-3	HOXA11	0.880482555
lnc-FTSJ3-1	HOXA11	0.735208186
lnc-GALNT3-1	HOXA11	0.903352334
lnc-GAMT-2	HOXA11	0.976926489
lnc-GANC-1	HOXA11	0.75058341
lnc-GATAD2B-1	HOXA11	0.785687598
lnc-GCC1-1	HOXA11	0.913861727
lnc-GDE1-2	HOXA11	0.784117709
lnc-GDPD4-1	HOXA11	0.891221448
lnc-GIT2-1	HOXA11	0.692152861
lnc-GJA10-8	HOXA11	-0.844333646
lnc-GJA4-2	HOXA11	0.776697481
lnc-GMNC-5	HOXA11	0.908669426
lnc-GMPR2-1	HOXA11	0.926090969
lnc-GNG13-5	HOXA11	-0.687272569
lnc-GPBP1-3	HOXA11	-0.727572259
lnc-GPR101-3	HOXA11	-0.813185441
lnc-GPR157-6	HOXA11	-0.71547376
lnc-GPR68-1	HOXA11	0.815719903
lnc-GRID2IP-1	HOXA11	0.861081586
lnc-GSG1L-1	HOXA11	0.875267395
lnc-GSTM5-1	HOXA11	0.854137786
lnc-GTF2E2-2	HOXA11	0.726992174
lnc-GUCY1A3-3	HOXA11	-0.925584789
lnc-GYG2P1-1	HOXA11	0.881316884
lnc-H3F3B-1	HOXA11	0.714026172
lnc-H3F3C-4	HOXA11	0.723590082
lnc-HAUS1-1	HOXA11	0.901459572
lnc-HCRTR1-1	HOXA11	0.717591614
lnc-HDLBP-1	HOXA11	0.926416827
lnc-HEATR4-6	HOXA11	0.865144566
lnc-HERC6-1	HOXA11	-0.831509798
lnc-HMBOX1-2	HOXA11	0.90525402
lnc-HMGA1-2	HOXA11	0.888034015
lnc-HMGB2-15	HOXA11	0.69157444
lnc-HMGB2-3	HOXA11	0.855002293
lnc-HOXA13-1	HOXA11	0.910958835
lnc-HOXB4-1	HOXA11	-0.871580122
lnc-HPDL-1	HOXA11	-0.848751965
lnc-HSP90AA1-3	HOXA11	0.901974552
lnc-HSPB6-1	HOXA11	0.718638976
lnc-IKBIP-1	HOXA11	0.688531206
lnc-IL10RB-3	HOXA11	0.798929251
lnc-IL23A-2	HOXA11	0.789560208
lnc-IL37-4	HOXA11	-0.808601058
lnc-IL6-8	HOXA11	0.866665987
lnc-IMPDH2-2	HOXA11	0.926381461
lnc-IQCF6-2	HOXA11	0.912762168
lnc-IRF2BP2-4	HOXA11	-0.815299582
lnc-IRF4-6	HOXA11	0.794704962
lnc-IRS2-8	HOXA11	-0.777289788
lnc-ITGB3BP-5	HOXA11	0.866963707
lnc-JMJD7-PLA2G4B-2	HOXA11	0.914489193
lnc-KAZALD1-1	HOXA11	0.874472557
lnc-KCNC1-2	HOXA11	-0.864328519
lnc-KCNT1-7	HOXA11	0.711148549
lnc-KCTD18-1	HOXA11	0.744803236
lnc-KDM5B-3	HOXA11	-0.826414786
lnc-KIAA0319-1	HOXA11	0.689661701
lnc-KIAA0564-2	HOXA11	0.751257956
lnc-KIAA0913-1	HOXA11	0.91941725
lnc-KIDINS220-11	HOXA11	-0.82662885
lnc-KIF13B-2	HOXA11	0.917661499
lnc-KIF26A-1	HOXA11	-0.698967893
lnc-KLHL22-2	HOXA11	0.842403111
lnc-KLHL36-2	HOXA11	0.761324593
lnc-KMO-1	HOXA11	-0.881121459
lnc-KRT80-9	HOXA11	0.862032389
lnc-LAMA5-2	HOXA11	0.893567494
lnc-LAMA5-3	HOXA11	0.899109417
lnc-LECT1-1	HOXA11	0.922969688
lnc-LEKR1-1	HOXA11	-0.832246094
lnc-LENG9-4	HOXA11	0.869172236
lnc-LMAN2-1	HOXA11	0.726540382
lnc-LMOD1-4	HOXA11	0.949155257
lnc-LPP-7	HOXA11	-0.825894213
lnc-LRIT2-4	HOXA11	0.901211731
lnc-LRSAM1-1	HOXA11	0.702429061
lnc-LY86-4	HOXA11	-0.800646033
lnc-MAFF-2	HOXA11	0.719523805
lnc-MAN2A2-2	HOXA11	0.836435442
lnc-MAP1LC3B-1	HOXA11	-0.847876334
lnc-MAPK6-8	HOXA11	0.694997118
lnc-MARCH10-1	HOXA11	0.695220926
lnc-MBOAT1-13	HOXA11	0.832410079
lnc-MBTPS2-1	HOXA11	-0.74025435
lnc-MCTS1-2	HOXA11	0.726031752
lnc-MDH2-2	HOXA11	0.843475583
lnc-MDS2-1	HOXA11	-0.727075863
lnc-MESDC1-2	HOXA11	-0.796479944
lnc-MLX-3	HOXA11	0.869318151
lnc-MMP23B-1	HOXA11	0.773244247
lnc-MORC2-2	HOXA11	0.831475659
lnc-MPPE1-3	HOXA11	0.848845851
lnc-MRPL41-1	HOXA11	0.939303061
lnc-MRPL48-1	HOXA11	0.900048787
lnc-MRPS25-5	HOXA11	0.893346741
lnc-MRPS27-1	HOXA11	-0.811339997
lnc-MRPS5-14	HOXA11	-0.835815082
lnc-MRTO4-2	HOXA11	0.710924805
lnc-MSI2-5	HOXA11	0.746521134
lnc-MSMP-2	HOXA11	0.704433689
lnc-MTIF3-2	HOXA11	0.70374067
lnc-MTRR-7	HOXA11	0.692716985
lnc-MYC-3	HOXA11	-0.912970747
lnc-MYL6-2	HOXA11	0.714126933
lnc-MYOM1-1	HOXA11	0.772417206
lnc-NAA60-1	HOXA11	0.878743483
lnc-NAB2-2	HOXA11	0.858369646
lnc-NBAS-15	HOXA11	0.777667149
lnc-NDUFAF2-2	HOXA11	0.812871674
lnc-NDUFB3-3	HOXA11	0.840765586
lnc-NECAB1-2	HOXA11	-0.770582439
lnc-NEURL4-1	HOXA11	0.864637339
lnc-NGFR-1	HOXA11	0.724152963
lnc-NHSL1-2	HOXA11	0.72400113
lnc-NIN-1	HOXA11	-0.835066151
lnc-NIPBL-1	HOXA11	0.84934159
lnc-NMBR-2	HOXA11	-0.901928787
lnc-NME6-2	HOXA11	0.881151552
lnc-NMNAT1-3	HOXA11	0.877898226
lnc-NPAT-2	HOXA11	0.70577863
lnc-NPB-3	HOXA11	0.853046057
lnc-NPY5R-2	HOXA11	-0.784038653
lnc-NR2F2-7	HOXA11	-0.792823327
lnc-NRIP2-2	HOXA11	0.757402179
lnc-NTAN1-1	HOXA11	0.794981496
lnc-NUDT6-3	HOXA11	-0.813489681
lnc-OAZ3-4	HOXA11	-0.824595185
lnc-OBSCN-3	HOXA11	0.912250717
lnc-OLR1-3	HOXA11	0.825841612
lnc-OR6S1-1	HOXA11	0.885472308
lnc-OSBPL7-1	HOXA11	0.801014067
lnc-OSBPL9-3	HOXA11	0.705050853
lnc-OTP-2	HOXA11	-0.837502599
lnc-P4HA3-1	HOXA11	0.709341156
lnc-PANK3-16	HOXA11	-0.771052147
lnc-PARN-10	HOXA11	0.717255225
lnc-PARN-14	HOXA11	-0.888576805
lnc-PCCA-2	HOXA11	0.850174291
lnc-PCDH1-5	HOXA11	-0.881288729
lnc-PCNA-1	HOXA11	0.909795637
lnc-PDAP1-1	HOXA11	0.807957159
lnc-PEA15-1	HOXA11	0.702101007
lnc-PER2-5	HOXA11	0.855104153
lnc-PEX14-1	HOXA11	0.837887038
lnc-PEX7-2	HOXA11	0.709927734
lnc-PFKP-16	HOXA11	-0.705555669
lnc-PGBD5-1	HOXA11	0.899697698
lnc-PHB2-4	HOXA11	0.719382353
lnc-PKLR-1	HOXA11	0.849986856
lnc-PKP4-4	HOXA11	-0.806647312
lnc-PLAT-4	HOXA11	0.739718451
lnc-PLD3-3	HOXA11	0.772949413
lnc-PNMA1-1	HOXA11	0.769132383
lnc-PPIF-1	HOXA11	0.776802735
lnc-PPM1D-1	HOXA11	-0.798061329
lnc-PPP2R3C-4	HOXA11	-0.769136625
lnc-PPP4C-8	HOXA11	0.697636743
lnc-PPP4R1-18	HOXA11	0.796650375
lnc-PRL-13	HOXA11	0.929103414
lnc-PRR15L-2	HOXA11	0.896154575
lnc-PRR15L-6	HOXA11	0.841821835
lnc-PSME1-1	HOXA11	0.728350592
lnc-PSMG4-11	HOXA11	-0.82800872
lnc-PSMG4-6	HOXA11	-0.739570499
lnc-PTGDR2-2	HOXA11	0.922556405
lnc-PTPRCAP-1	HOXA11	0.900800218
lnc-PTRHD1-1	HOXA11	0.898484893
lnc-RAB15-1	HOXA11	0.815086061
lnc-RAB17-2	HOXA11	0.691611147
lnc-RAB23-2	HOXA11	0.938927955
lnc-RAB3A-3	HOXA11	0.725582584
lnc-RADIL-1	HOXA11	0.866526195
lnc-RAG2-1	HOXA11	0.79097492
lnc-RARS-2	HOXA11	-0.789669368
lnc-RCC1-6	HOXA11	-0.909725349
lnc-RELL2-1	HOXA11	0.714019575
lnc-REM2-2	HOXA11	0.855156812
lnc-RG9MTD1-4	HOXA11	-0.856189692
lnc-RGS20-3	HOXA11	-0.805790961
lnc-RHBDF1-1	HOXA11	0.892470427
lnc-RHOA-1	HOXA11	0.847994374
lnc-RIC8A-1	HOXA11	0.892642404
lnc-RIOK1-2	HOXA11	-0.82522505
lnc-RNF113B-2	HOXA11	0.836796961
lnc-RNF125-2	HOXA11	0.862520841
lnc-RNF166-1	HOXA11	0.862650701
lnc-RNF24-1	HOXA11	0.915228326
lnc-RNF40-1	HOXA11	0.918866393
lnc-ROS1-2	HOXA11	-0.836773683
lnc-RP1-286D6.2.1-2	HOXA11	0.855816002
lnc-RP11-168K9.2.1-2	HOXA11	-0.801098638
lnc-RP11-404P21.6.1-9	HOXA11	0.979853901
lnc-RP11-498D10.4.1-1	HOXA11	0.747744017
lnc-RP11-537P22.1.1-1	HOXA11	-0.845684168
lnc-RP11-706O15.1.1-7	HOXA11	-0.758591856
lnc-RP11-884K10.5.1-2	HOXA11	-0.862609901
lnc-RPL14-2	HOXA11	0.718674919
lnc-RRP8-1	HOXA11	0.883155698
lnc-RSBN1L-2	HOXA11	0.871199443
lnc-RTN3-1	HOXA11	0.852950872
lnc-RUNDC3A-1	HOXA11	0.898945069
lnc-S100A13-2	HOXA11	0.845536295
lnc-S100A7A-1	HOXA11	-0.822418024
lnc-S1PR1-2	HOXA11	-0.727715161
lnc-S1PR2-2	HOXA11	0.853800437
lnc-SAFB-1	HOXA11	0.875800538
lnc-SALL1-6	HOXA11	-0.749684604
lnc-SCAND1-5	HOXA11	0.898111077
lnc-SCGB1D4-1	HOXA11	0.861722671
lnc-SCGB2B2-7	HOXA11	-0.844953663
lnc-SCML4-1	HOXA11	-0.824653927
lnc-SCNN1B-1	HOXA11	0.903656578
lnc-SCRN1-2	HOXA11	-0.791863741
lnc-SEC24B-1	HOXA11	-0.870829089
lnc-SEMA4B-2	HOXA11	0.880992549
lnc-SERAC1-3	HOXA11	0.870856537
lnc-SETD6-1	HOXA11	0.88537271
lnc-SGCG-11	HOXA11	0.72160075
lnc-SGTB-2	HOXA11	0.902408442
lnc-SHANK2-5	HOXA11	0.905300207
lnc-SHARPIN-2	HOXA11	0.87988735
lnc-SIVA1-1	HOXA11	0.77696201
lnc-SLC1A1-6	HOXA11	-0.775713002
lnc-SLC22A18-1	HOXA11	0.901197844
lnc-SLC22A23-1	HOXA11	0.747935176
lnc-SLC25A31-2	HOXA11	0.701607006
lnc-SLC30A4-2	HOXA11	0.946761918
lnc-SLC39A10-10	HOXA11	0.827688635
lnc-SLC3A2-1	HOXA11	0.890884195
lnc-SLC4A10-2	HOXA11	0.88486593
lnc-SLC7A6OS-2	HOXA11	0.875013756
lnc-SLCO2B1-2	HOXA11	0.900455705
lnc-SLCO2B1-3	HOXA11	0.726558898
lnc-SMARCC2-3	HOXA11	0.7854035
lnc-SMG6-3	HOXA11	0.809229366
lnc-SNN-5	HOXA11	0.743111747
lnc-SNX33-1	HOXA11	0.83851185
lnc-SP140-3	HOXA11	0.867317648
lnc-SP3-1	HOXA11	-0.865695878
lnc-SPATA21-3	HOXA11	0.866867775
lnc-SPATA9-1	HOXA11	0.899366894
lnc-SPATC1-1	HOXA11	0.76355515
lnc-SPIN1-1	HOXA11	-0.793663798
lnc-SPINT2-2	HOXA11	-0.802814362
lnc-SPPL3.1-3	HOXA11	0.906403591
lnc-SPRYD3-1	HOXA11	0.75568983
lnc-SRA1-3	HOXA11	0.788407473
lnc-SRGAP3-2	HOXA11	0.85294711
lnc-SRPRB-1	HOXA11	0.920675871
lnc-SRPX2-2	HOXA11	0.69052251
lnc-SRSF5-2	HOXA11	0.741383661
lnc-SSBP4-2	HOXA11	0.834053077
lnc-ST7L-3	HOXA11	0.7076478
lnc-STON1-1	HOXA11	-0.776811829
lnc-STUB1-2	HOXA11	0.825758926
lnc-SUCNR1-4	HOXA11	-0.827682752
lnc-SURF1-1	HOXA11	0.756913128
lnc-SVIL-3	HOXA11	0.899510851
lnc-SYCP1-1	HOXA11	-0.859549548
lnc-SYNM-2	HOXA11	0.686278231
lnc-SYT13-2	HOXA11	0.83178899
lnc-SZT2-2	HOXA11	0.882262351
lnc-TAF13-2	HOXA11	0.80074709
lnc-TAGLN-2	HOXA11	0.742226601
lnc-TAS2R42-1	HOXA11	0.851576173
lnc-TBXAS1-4	HOXA11	0.890260642
lnc-TCIRG1-1	HOXA11	0.897007893
lnc-TCTA-1	HOXA11	0.769603702
lnc-TFAP2C-4	HOXA11	-0.84584237
lnc-TGM6-4	HOXA11	0.806982209
lnc-THBS4-6	HOXA11	0.696387914
lnc-THUMPD3-4	HOXA11	0.781142296
lnc-THYN1-1	HOXA11	0.858297831
lnc-TIAL1-5	HOXA11	-0.822947824
lnc-TIGD1-1	HOXA11	0.866465533
lnc-TMBIM1-3	HOXA11	0.899286321
lnc-TMEM116-1	HOXA11	0.712618433
lnc-TMEM132D-2	HOXA11	-0.860547215
lnc-TMEM150A-1	HOXA11	0.805884411
lnc-TMEM186-1	HOXA11	0.864197677
lnc-TMEM234-4	HOXA11	0.960851049
lnc-TMEM43-1	HOXA11	0.921294267
lnc-TMEM98-2	HOXA11	0.82126391
lnc-TMUB2-1	HOXA11	0.735179016
lnc-TMUB2-2	HOXA11	0.823978589
lnc-TNFAIP3-5	HOXA11	-0.82338608
lnc-TNFRSF1A-3	HOXA11	0.703804778
lnc-TNIP2-1	HOXA11	0.786193284
lnc-TNN-1	HOXA11	0.801079347
lnc-TNNT1-1	HOXA11	-0.836483481
lnc-TOP1MT-5	HOXA11	0.726764974
lnc-TOR1AIP1-1	HOXA11	0.733977266
lnc-TOR1AIP1-2	HOXA11	0.836901175
lnc-TOR1AIP2-5	HOXA11	0.912633653
lnc-TPSG1-1	HOXA11	0.862019323
lnc-TRAFD1-1	HOXA11	0.855798478
lnc-TRAPPC12-1	HOXA11	0.759335628
lnc-TRAPPC4-1	HOXA11	0.706749631
lnc-TRIAP1-2	HOXA11	0.705260989
lnc-TRIM6-TRIM34-1	HOXA11	0.881544051
lnc-TRIM69-1	HOXA11	0.705915306
lnc-TRMT2A-1	HOXA11	0.70308887
lnc-TRRAP-1	HOXA11	0.925690598
lnc-TSPAN18-2	HOXA11	0.772210594
lnc-TSSK6-1	HOXA11	0.974840612
lnc-TTC35-7	HOXA11	-0.859545949
lnc-TTYH3-2	HOXA11	0.925686699
lnc-TUBA1C-3	HOXA11	0.696515548
lnc-TUBB2A-1	HOXA11	0.803467028
lnc-TUFM-1	HOXA11	0.701210277
lnc-TYMS-1	HOXA11	0.904505821
lnc-TYW1-1	HOXA11	0.785797889
lnc-UBAP1-5	HOXA11	0.814025424
lnc-UBC-1	HOXA11	-0.86172126
lnc-UBE2Z-1	HOXA11	0.771741806
lnc-UBE3A-6	HOXA11	0.884145731
lnc-UBFD1-1	HOXA11	0.959027721
lnc-UCK1-3	HOXA11	0.877426008
lnc-ULBP3-5	HOXA11	-0.891823041
lnc-UMODL1-5	HOXA11	0.90002023
lnc-URB2-1	HOXA11	0.836927074
lnc-USP37-1	HOXA11	0.867709697
lnc-USP40-2	HOXA11	0.951221797
lnc-VAC14-1	HOXA11	-0.781887322
lnc-VAT1-1	HOXA11	0.821308775
lnc-VN1R2-9	HOXA11	0.8908975
lnc-VPS33B-6	HOXA11	0.955308099
lnc-VRK3-1	HOXA11	0.726572145
lnc-VSTM2B-9	HOXA11	0.91713027
lnc-VTCN1-3	HOXA11	0.70891559
lnc-VWDE-1	HOXA11	0.701396384
lnc-WDR73-7	HOXA11	0.875449507
lnc-WDR73-9	HOXA11	0.742985329
lnc-WDR83OS-1	HOXA11	0.795546418
lnc-WIBG-1	HOXA11	0.893014888
lnc-WNT8A-2	HOXA11	0.862715467
lnc-XPOT-4	HOXA11	-0.827648906
lnc-XRCC6-1	HOXA11	0.92479834
lnc-YIF1B-1	HOXA11	0.795499188
lnc-YY1-1	HOXA11	0.724652377
lnc-ZBED4-1	HOXA11	0.697872515
lnc-ZBTB37-2	HOXA11	0.86476657
lnc-ZC3H12B-12	HOXA11	0.811594916
lnc-ZCCHC17-7	HOXA11	0.77281183
lnc-ZCCHC24-7	HOXA11	0.868042336
lnc-ZCCHC24-8	HOXA11	-0.721689262
lnc-ZFAND1-1	HOXA11	0.908491529
lnc-ZFAT-6	HOXA11	-0.859255392
lnc-ZFC3H1-5	HOXA11	-0.855527701
lnc-ZFYVE9-1	HOXA11	0.699776055
lnc-ZNF131-10	HOXA11	0.787497898
lnc-ZNF146-1	HOXA11	0.710213004
lnc-ZNF181-2	HOXA11	0.879088698
lnc-ZNF213-2	HOXA11	0.874246874
lnc-ZNF22-2	HOXA11	-0.692851685
lnc-ZNF394-2	HOXA11	0.976886066
lnc-ZNF552-2	HOXA11	0.924212684
lnc-ZNF724P-2	HOXA11	-0.892117859
lnc-ZNF788-1	HOXA11	0.85147299
lnc-ZNF814-1	HOXA11	0.843449426
lnc-ZSCAN2-5	HOXA11	0.878024014
lnc-ZXDA-1	HOXA11	0.805862313
MCM3AP-AS1	HOXA11	0.950569515
MIR100HG	HOXA11	-0.695364489
MIR4307HG	HOXA11	-0.83252179
MME-AS1	HOXA11	0.770781945
MORC2-AS1	HOXA11	0.881751161
MRVI1-AS1	HOXA11	0.82230023
NAPA-AS1	HOXA11	0.917095334
NKILA	HOXA11	0.925642564
PPP3CB-AS1	HOXA11	0.971745796
PRKAR2A-AS1	HOXA11	0.930635061
PTOV1-AS2	HOXA11	0.822784223
RUSC1-AS1	HOXA11	0.861223381
SBF2-AS1	HOXA11	0.726619983
SEMA3F-AS1	HOXA11	0.771265914
SIAH2-AS1	HOXA11	0.697238423
SOX2-OT	HOXA11	0.888487395
TCL6	HOXA11	-0.779342927
TESC-AS1	HOXA11	0.845220701
TRIM52-AS1	HOXA11	0.699554318
TSC22D1-AS1	HOXA11	0.821204911
TTC3-AS1	HOXA11	0.700615485
VIPR1-AS1	HOXA11	0.798264719
XLOC_000090	HOXA11	0.847775271
XLOC_000127	HOXA11	-0.864199214
XLOC_001976	HOXA11	0.910546731
XLOC_003475	HOXA11	-0.801991594
XLOC_004093	HOXA11	0.888614066
XLOC_004281	HOXA11	0.741137512
XLOC_005400	HOXA11	0.925900528
XLOC_005944	HOXA11	0.749343283
XLOC_006773	HOXA11	0.818494558
XLOC_1013783	HOXA11	0.877545283
XLOC_1015575	HOXA11	0.925342814
XLOC_1016089	HOXA11	0.817963119
XLOC_1174150	HOXA11	0.903425213
XLOC_1175128	HOXA11	-0.713899365
XLOC_1175315	HOXA11	0.901562115
XLOC_1176816	HOXA11	0.907839598
XLOC_1176877	HOXA11	0.70024028
XLOC_1229860	HOXA11	-0.729015799
XLOC_1230085	HOXA11	0.718926553
XLOC_1230790	HOXA11	-0.852772415
XLOC_1231971	HOXA11	0.784025492
XLOC_1236338	HOXA11	0.870598584
XLOC_1236417	HOXA11	-0.838872256
XLOC_1483319	HOXA11	-0.847059704
XLOC_1547464	HOXA11	0.777132296
XLOC_1584675	HOXA11	0.775979326
XLOC_1585090	HOXA11	-0.845707458
XLOC_1585364	HOXA11	0.92703167
XLOC_1621025	HOXA11	-0.876879733
XLOC_1621861	HOXA11	0.689543581
XLOC_1622314	HOXA11	0.784754408
XLOC_1623377	HOXA11	0.714449825
XLOC_1623520	HOXA11	0.852779721
XLOC_1623935	HOXA11	0.858100131
XLOC_1828250	HOXA11	0.868602101
XLOC_2029264	HOXA11	0.878017845
XLOC_2030250	HOXA11	0.827013984
XLOC_2031229	HOXA11	-0.83292027
XLOC_2031508	HOXA11	0.768176501
XLOC_2032021	HOXA11	0.721239416
XLOC_2217124	HOXA11	-0.925290345
XLOC_2217240	HOXA11	0.687343047
XLOC_2394807	HOXA11	0.868513129
XLOC_2557495	HOXA11	0.745679153
XLOC_2558202	HOXA11	-0.755573574
XLOC_2560875	HOXA11	0.723763388
XLOC_2711915	HOXA11	-0.801750104
XLOC_2712490	HOXA11	0.689270788
XLOC_2712800	HOXA11	0.713523159
XLOC_2714659	HOXA11	0.789211571
XLOC_2835378	HOXA11	-0.744011293
XLOC_2837916	HOXA11	-0.894146296
XLOC_378168	HOXA11	0.792318323
XLOC_514513	HOXA11	0.732834247
XLOC_515042	HOXA11	0.733889141
XLOC_515758	HOXA11	0.82209187
XLOC_516577	HOXA11	0.883913602
XLOC_651258	HOXA11	0.748559408
XLOC_753809	HOXA11	0.699750549
XLOC_754515	HOXA11	0.782541874
XLOC_845791	HOXA11	-0.863938386
XLOC_845984	HOXA11	0.771428693
XLOC_846292	HOXA11	0.914725257
XLOC_846295	HOXA11	0.865553514
XLOC_847013	HOXA11	0.92446003
XLOC_847150	HOXA11	0.717835938
XLOC_931187	HOXA11	0.715864713
XLOC_932037	HOXA11	0.907557563
XLOC_934016	HOXA11	0.892609665
ZNF337-AS1	HOXA11	0.954288506
ATP6V0E2-AS1	HOXD9	-0.69280049
B3GALT5-AS1	HOXD9	0.70883776
BIRC6-AS1	HOXD9	-0.703322606
BOLA3-AS1	HOXD9	-0.729789372
CBR3-AS1	HOXD9	-0.895203297
DANT1	HOXD9	0.746213539
DCTN1-AS1	HOXD9	-0.717812749
EVX1-AS	HOXD9	-0.692756054
HOXC-AS3	HOXD9	0.699282099
IDH1-AS1	HOXD9	-0.699497894
KDM4A-AS1	HOXD9	-0.901096488
LINC00237	HOXD9	0.731913788
LINC00620	HOXD9	0.82991102
LINC00689	HOXD9	-0.687788444
LINC00894	HOXD9	-0.686643918
LINC01039	HOXD9	0.742343873
LINC01359	HOXD9	0.787170566
lnc-ABCD3-1	HOXD9	0.764725935
lnc-ABHD12B-1	HOXD9	-0.695520956
lnc-AC008686.1-4	HOXD9	-0.759288455
lnc-AC010872.2.1-2	HOXD9	0.779487134
lnc-AC079341.1-10	HOXD9	-0.702900434
lnc-AC092295.7.1-2	HOXD9	-0.744428994
lnc-AE000662.92.1-10	HOXD9	0.736948859
lnc-AFM-3	HOXD9	-0.771500632
lnc-AGMAT-4	HOXD9	-0.695603644
lnc-AIDA-2	HOXD9	-0.73720253
lnc-AL136219.1-3	HOXD9	-0.822061994
lnc-AL590867.1-4	HOXD9	-0.728306149
lnc-AL901608.1-17	HOXD9	0.762152801
lnc-AL901608.1-3	HOXD9	0.770860146
lnc-AMDHD1-4	HOXD9	-0.831561905
lnc-ANKMY2-1	HOXD9	-0.701014916
lnc-APC-4	HOXD9	-0.721576174
lnc-ARHGAP11B-8	HOXD9	0.819248797
lnc-ARHGEF26-3	HOXD9	-0.701598865
lnc-ARL4D-1	HOXD9	-0.710035672
lnc-ATL1-2	HOXD9	-0.744206795
lnc-ATM-1	HOXD9	-0.702378704
lnc-B4GALT7-1	HOXD9	-0.788347489
lnc-BACE1-2	HOXD9	0.714322912
lnc-BHMT2-4	HOXD9	0.729324865
lnc-BTD-1	HOXD9	-0.76305541
lnc-C15orf48-1	HOXD9	-0.786286854
lnc-C16orf61-1	HOXD9	-0.732144217
lnc-C17orf101-3	HOXD9	0.826069513
lnc-C17orf104-1	HOXD9	-0.800581994
lnc-C19orf80-1	HOXD9	0.814800693
lnc-C1orf122-1	HOXD9	-0.71633925
lnc-C1S-1	HOXD9	-0.720094563
lnc-C2orf78-3	HOXD9	-0.90585848
lnc-C5orf27-4	HOXD9	-0.790263503
lnc-C5orf39-1	HOXD9	-0.909198569
lnc-C6orf105-5	HOXD9	-0.767822657
lnc-C6orf112-8	HOXD9	-0.748509695
lnc-C6orf146-4	HOXD9	-0.858700644
lnc-C9orf3-5	HOXD9	-0.902709637
lnc-C9orf3-6	HOXD9	-0.707911229
lnc-CAMKMT-1	HOXD9	0.712454384
lnc-CAP1-1	HOXD9	0.894401132
lnc-CAPN13-1	HOXD9	-0.694060707
lnc-CCDC125-22	HOXD9	-0.761215049
lnc-CD80-2	HOXD9	-0.732300783
lnc-CDH18-7	HOXD9	0.697895465
lnc-CDK20-4	HOXD9	0.901998994
lnc-CDR2-1	HOXD9	-0.814743193
lnc-CGNL1-3	HOXD9	0.947291297
lnc-CHAC1-4	HOXD9	-0.689068549
lnc-CHRNA4-4	HOXD9	0.718361896
lnc-CLASP2-1	HOXD9	-0.69368464
lnc-CLRN2-1	HOXD9	-0.82271496
lnc-COQ9-1	HOXD9	-0.794007705
lnc-CPM-2	HOXD9	-0.70527538
lnc-CREG1-2	HOXD9	-0.70257321
lnc-CREM-6	HOXD9	-0.689914699
lnc-CRHR1-6	HOXD9	-0.747765213
lnc-CRIPT-1	HOXD9	0.878704499
lnc-DALRD3-1	HOXD9	-0.721244904
lnc-DDX27-3	HOXD9	-0.760494662
lnc-DLX2-3	HOXD9	-0.769684869
lnc-DR1-1	HOXD9	-0.711889693
lnc-DUSP11-4	HOXD9	-0.703246242
lnc-DUSP14-4	HOXD9	-0.767619722
lnc-DUXA-3	HOXD9	-0.714620139
lnc-EAF2-3	HOXD9	-0.689749646
lnc-EPOR-2	HOXD9	-0.697330228
lnc-ESD-1	HOXD9	-0.706638267
lnc-FAM179A-1	HOXD9	0.871261983
lnc-FAM72B-2	HOXD9	-0.801001372
lnc-FAM96B-3	HOXD9	-0.689342435
lnc-FGFR1OP2-1	HOXD9	-0.789602271
lnc-FMO5-1	HOXD9	-0.793345433
lnc-FOXM1-1	HOXD9	-0.747431861
lnc-GALNTL2-1	HOXD9	0.911416329
lnc-GARS-2	HOXD9	-0.74467744
lnc-GCC1-1	HOXD9	-0.723214928
lnc-GNG13-5	HOXD9	0.719655298
lnc-GPR27-5	HOXD9	-0.72088141
lnc-GPRC5D-1	HOXD9	-0.690407467
lnc-GRHL2-14	HOXD9	-0.800162599
lnc-HBG2-1	HOXD9	-0.795573259
lnc-HMGA1-2	HOXD9	-0.699251821
lnc-HMGB2-3	HOXD9	-0.78392397
lnc-HOXA13-4	HOXD9	-0.701419057
lnc-HSP90AA1-1	HOXD9	-0.737278458
lnc-HTRA2-1	HOXD9	0.822044685
lnc-IARS2-2	HOXD9	-0.72912982
lnc-IFT46-1	HOXD9	-0.798647923
lnc-IKZF1-2	HOXD9	-0.783831734
lnc-IKZF2-9	HOXD9	-0.706869943
lnc-IQCF6-2	HOXD9	-0.752066884
lnc-JAG1-6	HOXD9	-0.781517834
lnc-KDM3A-1	HOXD9	-0.735447387
lnc-KIAA0125-2	HOXD9	0.743255579
lnc-KIAA1609-1	HOXD9	-0.792076302
lnc-KLHL31-8	HOXD9	-0.793815007
lnc-LAD1-1	HOXD9	0.739748237
lnc-LETM2-2	HOXD9	-0.695582722
lnc-LSS-1	HOXD9	-0.690469243
lnc-MACC1-1	HOXD9	-0.699349481
lnc-MAFF-6	HOXD9	-0.907321391
lnc-MAP1LC3B-9	HOXD9	-0.779140822
lnc-MAP6-1	HOXD9	-0.69143442
lnc-MARCH4-1	HOXD9	-0.717254838
lnc-MFSD2A-1	HOXD9	-0.697427199
lnc-MKLN1-1	HOXD9	-0.760607766
lnc-MOCS2-3	HOXD9	-0.693212999
lnc-MPEG1-2	HOXD9	-0.68880199
lnc-MRPL40-4	HOXD9	-0.782711242
lnc-MRPS11-2	HOXD9	-0.753456393
lnc-MRPS24-2	HOXD9	-0.736112629
lnc-MRPS27-10	HOXD9	-0.715178177
lnc-MTO1-1	HOXD9	-0.818855201
lnc-MYL12A-1	HOXD9	-0.700146132
lnc-MYO7B-2	HOXD9	-0.777678378
lnc-NDUFS6-15	HOXD9	-0.802495236
lnc-NDUFS6-17	HOXD9	-0.699503679
lnc-NFATC3-1	HOXD9	-0.746153888
lnc-NIPAL1-2	HOXD9	-0.71552538
lnc-NLN-2	HOXD9	0.878538533
lnc-NNT-5	HOXD9	-0.748411947
lnc-NRIP2-1	HOXD9	-0.791976621
lnc-NSMCE1-1	HOXD9	-0.723831415
lnc-ODF4-2	HOXD9	-0.796410071
lnc-PCNA-1	HOXD9	-0.688749972
lnc-PDE4D-1	HOXD9	-0.851028601
lnc-PFKP-16	HOXD9	0.768537382
lnc-PHYHIP-1	HOXD9	-0.697007011
lnc-PIGG-2	HOXD9	-0.753061558
lnc-PIGY-5	HOXD9	-0.773117382
lnc-PLCG1-1	HOXD9	-0.704994249
lnc-PLXND1-2	HOXD9	-0.760524316
lnc-POTEM-4	HOXD9	-0.765882362
lnc-PPIAL4C-9	HOXD9	-0.687967756
lnc-PPP1R3G-3	HOXD9	0.694231335
lnc-PRDM4-4	HOXD9	-0.793881603
lnc-PRKAB2-1	HOXD9	-0.688188369
lnc-PRR11-1	HOXD9	-0.797076542
lnc-PRR15L-2	HOXD9	-0.749963919
lnc-PTPN6-1	HOXD9	-0.691056111
lnc-PTTG1-6	HOXD9	-0.749908086
lnc-PURG-1	HOXD9	-0.769847032
lnc-PXDC1-12	HOXD9	-0.822954865
lnc-RAB23-2	HOXD9	-0.789491214
lnc-RABL2A-5	HOXD9	-0.749993228
lnc-RALB-8	HOXD9	-0.714613388
lnc-RBM10-1	HOXD9	-0.768437296
lnc-RBM26-1	HOXD9	-0.763010555
lnc-RC3H1-1	HOXD9	-0.696980987
lnc-RGS18-6	HOXD9	-0.778553056
lnc-RNF139-2	HOXD9	-0.711528267
lnc-RP11-1012A1.4.1-2	HOXD9	-0.746343327
lnc-RP11-116D17.1.1-4	HOXD9	0.75707005
lnc-RP11-180C1.1.1-8	HOXD9	0.795139161
lnc-RP11-279O9.4.1-1	HOXD9	-0.913271887
lnc-RPF1-1	HOXD9	-0.754896823
lnc-RPL30-1	HOXD9	-0.701099756
lnc-RSPH1-3	HOXD9	0.760717382
lnc-SAMD5-1	HOXD9	0.868289755
lnc-SCN2A-6	HOXD9	-0.722693152
lnc-SDCCAG8-1	HOXD9	-0.759840881
lnc-SGSH-1	HOXD9	-0.698887513
lnc-SLC12A2-3	HOXD9	-0.894698251
lnc-SLC25A21-4	HOXD9	-0.689113761
lnc-SLC25A47-5	HOXD9	-0.741111179
lnc-SLC2A6-2	HOXD9	-0.686324179
lnc-SLC30A4-2	HOXD9	-0.732968935
lnc-SLC35F5-17	HOXD9	-0.77927315
lnc-SLC38A8-9	HOXD9	-0.699065771
lnc-SLCO2B1-3	HOXD9	-0.712463038
lnc-SP110-5	HOXD9	-0.710751293
lnc-SP110-8	HOXD9	-0.772637364
lnc-SPPL3.1-3	HOXD9	-0.793110918
lnc-STAG3L4-5	HOXD9	-0.700043893
lnc-STARD9-1	HOXD9	-0.738304578
lnc-TATDN1-2	HOXD9	-0.829614584
lnc-TBL1XR1-6	HOXD9	0.730536832
lnc-TBP-3	HOXD9	-0.726919335
lnc-TCHP-1	HOXD9	-0.706311146
lnc-TEKT1-2	HOXD9	-0.758800594
lnc-TIGD6-1	HOXD9	-0.775520477
lnc-TK2-2	HOXD9	-0.727904223
lnc-TM2D2-1	HOXD9	-0.708116303
lnc-TMED5-5	HOXD9	-0.885583997
lnc-TMEM156-1	HOXD9	-0.717165454
lnc-TMEM161B-4	HOXD9	-0.78129723
lnc-TMEM194B-6	HOXD9	-0.693823067
lnc-TMEM22-2	HOXD9	-0.695180863
lnc-TMEM234-1	HOXD9	-0.763898677
lnc-TMEM27-1	HOXD9	-0.78476491
lnc-TMEM85-2	HOXD9	-0.705173548
lnc-TNNC2-1	HOXD9	-0.925614504
lnc-TOR3A-1	HOXD9	-0.736253103
lnc-TSHZ3-2	HOXD9	-0.77667949
lnc-TSKS-1	HOXD9	-0.72089123
lnc-UBFD1-1	HOXD9	-0.702811138
lnc-VMAC-1	HOXD9	-0.744989338
lnc-VRK3-2	HOXD9	-0.68693388
lnc-VSTM2B-9	HOXD9	-0.743637115
lnc-WIBG-1	HOXD9	-0.722264003
lnc-WNT1-2	HOXD9	-0.853477915
lnc-YIF1B-1	HOXD9	-0.710645764
lnc-ZC3H12B-12	HOXD9	-0.777445683
lnc-ZCCHC17-7	HOXD9	-0.796612929
lnc-ZFP42-2	HOXD9	0.71726843
lnc-ZFP62-1	HOXD9	-0.804785393
lnc-ZNF235-2	HOXD9	-0.686217945
lnc-ZNF257-5	HOXD9	-0.694873641
lnc-ZNF397-2	HOXD9	-0.693412157
lnc-ZNF486-6	HOXD9	-0.720962865
lnc-ZNF532-2	HOXD9	-0.721137877
lnc-ZNF551-2	HOXD9	-0.716029758
lnc-ZNF583-5	HOXD9	-0.717878892
lnc-ZNF639-1	HOXD9	0.724453898
lnc-ZNF681-2	HOXD9	-0.699230723
lnc-ZNF681-4	HOXD9	-0.698345111
lnc-ZNF701-2	HOXD9	-0.697790857
lnc-ZNF780B-1	HOXD9	-0.692021531
lnc-ZNF792-5	HOXD9	-0.745765741
lnc-ZNF804B-1	HOXD9	0.799950327
lnc-ZNF804B-2	HOXD9	0.744480949
lnc-ZNF83-6	HOXD9	-0.689625384
lnc-ZSCAN21-1	HOXD9	-0.733576912
MCCC1-AS1	HOXD9	-0.687931624
NCBP2-AS1	HOXD9	-0.698653173
PCF11-AS1	HOXD9	-0.849567177
PPP3CB-AS1	HOXD9	-0.696198265
SNAP25-AS1	HOXD9	-0.69700282
STARD4-AS1	HOXD9	-0.796577973
TRIM52-AS1	HOXD9	-0.783036357
XLOC_1015300	HOXD9	-0.730917897
XLOC_1174283	HOXD9	-0.695622406
XLOC_1175427	HOXD9	-0.771362593
XLOC_1175795	HOXD9	-0.705405766
XLOC_1176619	HOXD9	-0.690758699
XLOC_1230810	HOXD9	-0.710874978
XLOC_1547746	HOXD9	0.78323003
XLOC_1586489	HOXD9	-0.874314457
XLOC_1623353	HOXD9	-0.699839717
XLOC_1624910	HOXD9	-0.709492514
XLOC_1828067	HOXD9	-0.758699583
XLOC_2032959	HOXD9	-0.838668338
XLOC_2218688	HOXD9	0.904551141
XLOC_2220157	HOXD9	-0.766049621
XLOC_2393336	HOXD9	-0.749392503
XLOC_2557495	HOXD9	-0.730348855
XLOC_2714423	HOXD9	-0.728528467
XLOC_2835378	HOXD9	0.729544498
XLOC_375823	HOXD9	-0.772183897
XLOC_376348	HOXD9	-0.704405392
XLOC_379277	HOXD9	0.89537237
XLOC_516588	HOXD9	0.856866055
XLOC_752519	HOXD9	-0.779260482
ZNF571-AS1	HOXD9	-0.713906161
ZSCAN16-AS1	HOXD9	-0.716940905
ADIRF-AS1	SPATA21	-0.719952764
ATP6V0E2-AS1	SPATA21	-0.717952224
BOLA3-AS1	SPATA21	-0.72846722
C15orf59-AS1	SPATA21	-0.821406413
CFLAR-AS1	SPATA21	-0.703356107
DLGAP4-AS1	SPATA21	-0.812465119
EAF1-AS1	SPATA21	-0.863605888
EVX1-AS	SPATA21	-0.742181848
FARP1-AS1	SPATA21	-0.748098115
FLNB-AS1	SPATA21	-0.741287666
GRTP1-AS1	SPATA21	-0.736266996
GTF3C2-AS1	SPATA21	-0.700261282
H1FX-AS1	SPATA21	-0.703985451
HAGLROS	SPATA21	-0.725271536
IDH1-AS1	SPATA21	-0.74273144
IGBP1-AS2	SPATA21	-0.772616577
LIMD1-AS1	SPATA21	-0.728517819
LINC00649	SPATA21	-0.727384415
LINC00847	SPATA21	-0.698687996
LINC00890	SPATA21	-0.803391571
LINC00959	SPATA21	0.691233814
lnc-A1BG-3	SPATA21	-0.911079545
lnc-ABAT-3	SPATA21	-0.745513719
lnc-AC002553.1-1	SPATA21	-0.751337707
lnc-AC006050.2.1-6	SPATA21	-0.752861061
lnc-AC008073.6.1-2	SPATA21	-0.86689266
lnc-AC010336.2-1	SPATA21	-0.815270376
lnc-AC011239.1.1-6	SPATA21	0.729154632
lnc-AC018816.3.1-11	SPATA21	-0.715361448
lnc-AC018816.3.1-9	SPATA21	-0.715654983
lnc-AC027323.1-2	SPATA21	-0.743987616
lnc-AC074212.3.1-1	SPATA21	-0.768063859
lnc-AC079341.1-10	SPATA21	-0.727855152
lnc-AC084851.1-9	SPATA21	-0.717871806
lnc-AC127496.3-6	SPATA21	-0.94833484
lnc-AC127496.3-7	SPATA21	-0.74913145
lnc-ACSBG1-4	SPATA21	-0.818716346
lnc-ADAMTS18-3	SPATA21	-0.73835807
lnc-AFM-3	SPATA21	-0.688529282
lnc-AGMAT-4	SPATA21	-0.751663991
lnc-AGPS-3	SPATA21	-0.802761705
lnc-AGRP-7	SPATA21	0.802577363
lnc-AHSA2-5	SPATA21	-0.740324205
lnc-AIDA-1	SPATA21	-0.686995025
lnc-ALG2-6	SPATA21	0.7379279
lnc-ALX4-5	SPATA21	-0.751143694
lnc-AMDHD1-2	SPATA21	-0.716186711
lnc-AMDHD1-3	SPATA21	-0.767891565
lnc-AMDHD2-2	SPATA21	-0.926856039
lnc-ANAPC11-2	SPATA21	-0.715581987
lnc-ANKMY2-1	SPATA21	-0.758287081
lnc-ANKRD20A2-14	SPATA21	-0.842884193
lnc-ANKS6-1	SPATA21	-0.744634633
lnc-AP1S2-1	SPATA21	-0.739168683
lnc-AP3S1-1	SPATA21	-0.862746657
lnc-AP3S1-15	SPATA21	-0.752815692
lnc-AP3S1-4	SPATA21	-0.726572242
lnc-APC-4	SPATA21	-0.743220184
lnc-APITD1-CORT-1	SPATA21	-0.73932993
lnc-ARHGAP28-7	SPATA21	-0.859648199
lnc-ARHGEF38-1	SPATA21	-0.71164224
lnc-ARHGEF40-1	SPATA21	-0.931638238
lnc-ARID5A-2	SPATA21	-0.882040498
lnc-ARL1-3	SPATA21	-0.72380352
lnc-ARL16-1	SPATA21	-0.746452145
lnc-ARL4D-1	SPATA21	-0.730104054
lnc-ARMC2-1	SPATA21	-0.781964928
lnc-ARMC7-1	SPATA21	-0.815861431
lnc-ARVCF-4	SPATA21	-0.801257689
lnc-ASB5-1	SPATA21	-0.862867513
lnc-ASCC2-1	SPATA21	-0.699941214
lnc-ATM-1	SPATA21	-0.765048866
lnc-ATP2C2-1	SPATA21	-0.688128677
lnc-ATP6V1C2-2	SPATA21	-0.815924277
lnc-B4GALT7-1	SPATA21	-0.695328841
lnc-B9D1-1	SPATA21	-0.786874609
lnc-BASP1-1	SPATA21	-0.735036615
lnc-BCL6-9	SPATA21	-0.953133574
lnc-BDH1-5	SPATA21	0.839383972
lnc-BEAN1-1	SPATA21	-0.923344312
lnc-BNIP2-2	SPATA21	0.726610275
lnc-BPHL-9	SPATA21	-0.716535248
lnc-BRAT1-2	SPATA21	-0.712158102
lnc-BRI3-1	SPATA21	-0.848318446
lnc-BTBD6-1	SPATA21	-0.804638719
lnc-BTD-1	SPATA21	-0.743218118
lnc-BTG2-3	SPATA21	-0.748686996
lnc-C11orf41-1	SPATA21	-0.701869582
lnc-C14orf23-2	SPATA21	0.755419632
lnc-C15orf32-3	SPATA21	-0.686677732
lnc-C17orf97-5	SPATA21	-0.724733188
lnc-C19orf6-3	SPATA21	-0.73754492
lnc-C19orf6-5	SPATA21	-0.715170083
lnc-C19orf68-4	SPATA21	-0.857675621
lnc-C1orf122-1	SPATA21	-0.707920816
lnc-C1orf123-1	SPATA21	-0.742898434
lnc-C1orf201-3	SPATA21	-0.886264405
lnc-C1orf43-4	SPATA21	-0.880251163
lnc-C1orf56-1	SPATA21	-0.781312645
lnc-C1orf85-1	SPATA21	-0.760707215
lnc-C1QBP-1	SPATA21	-0.708982467
lnc-C1QTNF5-1	SPATA21	-0.94576869
lnc-C1S-1	SPATA21	-0.69199394
lnc-C20orf187-1	SPATA21	0.694339307
lnc-C2orf89-2	SPATA21	-0.734391567
lnc-C3orf23-2	SPATA21	-0.741041395
lnc-C3orf24-1	SPATA21	-0.741439383
lnc-C4orf21-1	SPATA21	-0.741240918
lnc-C5orf25-1	SPATA21	-0.763611126
lnc-C5orf35-3	SPATA21	-0.751624105
lnc-C5orf39-3	SPATA21	-0.735537461
lnc-C5orf45-1	SPATA21	-0.837392719
lnc-C5orf63-2	SPATA21	-0.690475132
lnc-C6orf108-1	SPATA21	-0.895291302
lnc-C6orf99-7	SPATA21	-0.726783023
lnc-C8orf48-7	SPATA21	0.691547465
lnc-C8orf56-3	SPATA21	-0.885062473
lnc-C9orf3-6	SPATA21	-0.696401234
lnc-C9orf43-1	SPATA21	-0.891752988
lnc-C9orf57-3	SPATA21	-0.755547477
lnc-CAB39L-4	SPATA21	-0.738390807
lnc-CAPN13-1	SPATA21	-0.718056248
lnc-CAPN2-2	SPATA21	-0.70433993
lnc-CASKIN2-1	SPATA21	-0.743540311
lnc-CCDC127-2	SPATA21	0.72411178
lnc-CCDC148-1	SPATA21	-0.746901274
lnc-CCDC68-1	SPATA21	-0.845688634
lnc-CCDC7-2	SPATA21	-0.697792733
lnc-CCDC85C-2	SPATA21	-0.89275969
lnc-CCNB1IP1-2	SPATA21	-0.687231596
lnc-CD226-5	SPATA21	0.69932714
lnc-CD37-1	SPATA21	-0.688527808
lnc-CD53-2	SPATA21	-0.705874218
lnc-CDIPT-1	SPATA21	-0.703916804
lnc-CDKL1-1	SPATA21	-0.805504619
lnc-CEBPG-4	SPATA21	-0.725203687
lnc-CELF3-2	SPATA21	-0.806865799
lnc-CEMP1-10	SPATA21	-0.833098949
lnc-CHAC1-4	SPATA21	-0.763775897
lnc-CHAD-3	SPATA21	-0.747501628
lnc-CHADL-1	SPATA21	-0.767748777
lnc-CHRNA3-5	SPATA21	-0.767006637
lnc-CHRNA5-3	SPATA21	0.710072659
lnc-CHRNA9-2	SPATA21	-0.784147046
lnc-CHST7-2	SPATA21	-0.774756725
lnc-CIB3-1	SPATA21	-0.726835971
lnc-CKAP4-1	SPATA21	-0.697170833
lnc-CLASP2-1	SPATA21	-0.68704316
lnc-CLDN6-4	SPATA21	-0.950486001
lnc-CNIH3-2	SPATA21	0.750423097
lnc-COL28A1-1	SPATA21	-0.691334852
lnc-COTL1-2	SPATA21	-0.765890656
lnc-CPLX1-2	SPATA21	-0.788954356
lnc-CPLX1-3	SPATA21	-0.910362533
lnc-CPM-2	SPATA21	-0.750393511
lnc-CREG1-2	SPATA21	-0.743120595
lnc-CRHR1-6	SPATA21	-0.700516384
lnc-CSNK1A1-7	SPATA21	-0.742983
lnc-CSNK1G2-4	SPATA21	-0.689384429
lnc-CTNS-1	SPATA21	-0.821165662
lnc-CTRB1-2	SPATA21	-0.707824131
lnc-CTRL-2	SPATA21	-0.722089503
lnc-CTSZ-7	SPATA21	-0.735615401
lnc-CXCL16-1	SPATA21	-0.731676256
lnc-CYB5D2-2	SPATA21	-0.726126948
lnc-CYB5R2-3	SPATA21	0.763811375
lnc-CYB5R2-5	SPATA21	-0.893563324
lnc-DALRD3-1	SPATA21	-0.719977496
lnc-DALRD3-2	SPATA21	-0.78674655
lnc-DBNDD1-1	SPATA21	-0.748639776
lnc-DCAF6-1	SPATA21	-0.759714703
lnc-DDX54-1	SPATA21	-0.917484796
lnc-DHRS7B-1	SPATA21	0.697410781
lnc-DHRS7B-3	SPATA21	-0.7370689
lnc-DHX36-3	SPATA21	-0.692729843
lnc-DKK4-5	SPATA21	-0.876558456
lnc-DLEU7-5	SPATA21	-0.727008236
lnc-DNAJA1-1	SPATA21	-0.81171415
lnc-DNAJA4-1	SPATA21	-0.900243639
lnc-DNASE1L2-1	SPATA21	-0.686364559
lnc-DONSON-1	SPATA21	-0.717158816
lnc-DPCD-3	SPATA21	-0.903925814
lnc-DPP4-2	SPATA21	-0.848594809
lnc-DSCC1-1	SPATA21	-0.935057932
lnc-DTHD1-5	SPATA21	0.716806967
lnc-DUSP11-3	SPATA21	-0.695610779
lnc-DUXA-3	SPATA21	-0.750580467
lnc-DYSF-12	SPATA21	-0.768043877
lnc-EDC3-5	SPATA21	-0.751861458
lnc-EEF1B2-2	SPATA21	-0.744039945
lnc-EIF2AK4-3	SPATA21	-0.748151026
lnc-EPOR-2	SPATA21	-0.710072594
lnc-ERAL1-3	SPATA21	-0.816566159
lnc-ERAP1-1	SPATA21	-0.920466372
lnc-ERP44-1	SPATA21	-0.76687498
lnc-ESD-1	SPATA21	-0.73856226
lnc-ESPN-3	SPATA21	-0.713026986
lnc-EXOC3-3	SPATA21	-0.787352082
lnc-FABP3-1	SPATA21	-0.758375076
lnc-FAM117A-1	SPATA21	-0.732430162
lnc-FAM120B-3	SPATA21	0.836274798
lnc-FAM135A-2	SPATA21	-0.708702965
lnc-FAM161B-1	SPATA21	-0.695679849
lnc-FAM162A-2	SPATA21	-0.900991998
lnc-FAM183A-3	SPATA21	-0.833850466
lnc-FAM196A-1	SPATA21	-0.699467218
lnc-FAM198B-1	SPATA21	-0.723076234
lnc-FAM57A-2	SPATA21	-0.751621726
lnc-FAM59B-3	SPATA21	-0.879138388
lnc-FAM8A1-2	SPATA21	-0.801898514
lnc-FAM96B-3	SPATA21	-0.762675685
lnc-FBN1-3	SPATA21	-0.704972205
lnc-FBXO47-1	SPATA21	-0.819791389
lnc-FEM1A-4	SPATA21	-0.905815546
lnc-FER-1	SPATA21	-0.786731383
lnc-FIGNL1-1	SPATA21	-0.749406353
lnc-FKBP8-1	SPATA21	-0.732836918
lnc-FKRP-1	SPATA21	-0.903548005
lnc-FOXM1-1	SPATA21	-0.741627861
lnc-FOXN1-1	SPATA21	-0.731988402
lnc-FPR2-1	SPATA21	0.759228996
lnc-FREM3-6	SPATA21	-0.932660331
lnc-FSCN1-2	SPATA21	-0.727022947
lnc-FSCN2-3	SPATA21	-0.754123531
lnc-FTSJ3-1	SPATA21	-0.919948071
lnc-FUBP3-1	SPATA21	-0.711289542
lnc-GADD45A-2	SPATA21	-0.711508161
lnc-GAMT-2	SPATA21	-0.687140374
lnc-GAMT-7	SPATA21	-0.73723037
lnc-GCC1-1	SPATA21	-0.815377207
lnc-GDPD4-1	SPATA21	-0.720069443
lnc-GIT2-1	SPATA21	-0.914306475
lnc-GJA4-2	SPATA21	-0.868998658
lnc-GK-3	SPATA21	-0.83346296
lnc-GLIPR1L1-2	SPATA21	-0.725215534
lnc-GLRX2-1	SPATA21	-0.744555998
lnc-GMNC-5	SPATA21	-0.781794146
lnc-GMPR2-1	SPATA21	-0.766924074
lnc-GOSR2-2	SPATA21	-0.720715821
lnc-GPLD1-1	SPATA21	-0.807843943
lnc-GPR101-3	SPATA21	0.731459974
lnc-GPR126-1	SPATA21	-0.854280177
lnc-GPR160-1	SPATA21	-0.764571454
lnc-GPR27-5	SPATA21	-0.727989761
lnc-GPRC5D-1	SPATA21	-0.745234633
lnc-GRID2IP-1	SPATA21	-0.722409033
lnc-GSG1L-1	SPATA21	-0.792555776
lnc-GTF2E2-2	SPATA21	-0.873760434
lnc-GUCY1A3-3	SPATA21	0.844205313
lnc-GYG2P1-1	SPATA21	-0.715821842
lnc-H2AFY2-1	SPATA21	-0.758778492
lnc-H3F3B-1	SPATA21	-0.938401173
lnc-H3F3C-4	SPATA21	-0.801225567
lnc-HABP4-4	SPATA21	-0.786461125
lnc-HAND1-3	SPATA21	-0.904312439
lnc-HAUS1-1	SPATA21	-0.728852001
lnc-HCN3-1	SPATA21	-0.730186654
lnc-HCRTR1-1	SPATA21	-0.947497075
lnc-HDLBP-3	SPATA21	-0.805000351
lnc-HEATR4-6	SPATA21	-0.72763979
lnc-HIP1R-1	SPATA21	-0.70598941
lnc-HMBOX1-2	SPATA21	-0.783451217
lnc-HMBOX1-8	SPATA21	-0.75114032
lnc-HMGB2-15	SPATA21	-0.929379505
lnc-HMGB2-3	SPATA21	-0.745077882
lnc-HOXA13-1	SPATA21	-0.763303554
lnc-HOXB4-1	SPATA21	0.690398239
lnc-HSP90AA1-1	SPATA21	-0.696348922
lnc-HSPB1-3	SPATA21	0.74763251
lnc-HSPB7-1	SPATA21	-0.717216008
lnc-ID2-1	SPATA21	-0.792233447
lnc-ID4-2	SPATA21	-0.72979903
lnc-IKBIP-1	SPATA21	-0.774318029
lnc-IKZF2-9	SPATA21	-0.750968594
lnc-IL12RB1-2	SPATA21	-0.81058534
lnc-IMPDH2-2	SPATA21	-0.698941172
lnc-ING1-3	SPATA21	-0.756956951
lnc-INPPL1-1	SPATA21	-0.79848226
lnc-INTS12-1	SPATA21	-0.711247429
lnc-INTS12-2	SPATA21	-0.719738487
lnc-IQCG-2	SPATA21	-0.732535052
lnc-IRAK4-2	SPATA21	-0.70470523
lnc-IRF1-4	SPATA21	-0.725879533
lnc-IRF4-6	SPATA21	-0.895212788
lnc-ITGAD-1	SPATA21	-0.871791077
lnc-JAG1-1	SPATA21	-0.779648805
lnc-KATNAL2-5	SPATA21	-0.752908202
lnc-KAZALD1-1	SPATA21	-0.758351364
lnc-KCNC1-2	SPATA21	0.74537929
lnc-KCNH5-3	SPATA21	-0.696842948
lnc-KCNT1-2	SPATA21	-0.78233973
lnc-KCNT1-7	SPATA21	-0.964532723
lnc-KCTD18-1	SPATA21	-0.719125784
lnc-KCTD4-1	SPATA21	-0.75329345
lnc-KDM3A-1	SPATA21	-0.749738369
lnc-KIAA0020-7	SPATA21	-0.731325194
lnc-KIAA0196-5	SPATA21	-0.810661056
lnc-KIAA0319-1	SPATA21	-0.856793776
lnc-KIAA0564-2	SPATA21	-0.904534122
lnc-KIAA0664-2	SPATA21	-0.75786437
lnc-KIAA1147-1	SPATA21	-0.793676077
lnc-KIAA1731-1	SPATA21	-0.744234087
lnc-KIF13B-2	SPATA21	-0.697702738
lnc-KLHL22-2	SPATA21	-0.807523043
lnc-KLHL25-12	SPATA21	-0.831079696
lnc-KLHL25-6	SPATA21	-0.842837878
lnc-KMO-1	SPATA21	0.749730699
lnc-KRT80-10	SPATA21	-0.708408519
lnc-KRT80-9	SPATA21	-0.751660705
lnc-LEKR1-1	SPATA21	0.729537156
lnc-LEPRE1-1	SPATA21	-0.710216998
lnc-LETM2-5	SPATA21	-0.748420268
lnc-LIPG-2	SPATA21	-0.721376815
lnc-LMAN2-1	SPATA21	-0.933691943
lnc-LMOD1-4	SPATA21	-0.697202205
lnc-LOH12CR1-1	SPATA21	-0.753871203
lnc-LPIN2-1	SPATA21	-0.708338024
lnc-LRRC38-2	SPATA21	-0.741935557
lnc-LRRC57-1	SPATA21	-0.858411819
lnc-LRRFIP2-1	SPATA21	-0.865919245
lnc-LSM5-2	SPATA21	-0.763895579
lnc-LUZP1-3	SPATA21	-0.752761477
lnc-LYRM2-2	SPATA21	-0.720733588
lnc-MACC1-1	SPATA21	-0.830826112
lnc-MAFF-2	SPATA21	-0.911312775
lnc-MANSC4-2	SPATA21	-0.761019871
lnc-MAP6-1	SPATA21	-0.708037079
lnc-MAPK6-5	SPATA21	-0.75634024
lnc-MAPK6-8	SPATA21	-0.784089541
lnc-MARCH10-1	SPATA21	-0.976997338
lnc-MARCKS-5	SPATA21	0.80699535
lnc-MBOAT1-13	SPATA21	-0.773098398
lnc-MCTS1-2	SPATA21	-0.712636922
lnc-MDM4-8	SPATA21	-0.728570317
lnc-MED10-11	SPATA21	0.727866754
lnc-MEPCE-2	SPATA21	-0.928393456
lnc-MEST-2	SPATA21	-0.797085121
lnc-MFSD2A-1	SPATA21	-0.753581243
lnc-MFSD4-1	SPATA21	-0.750808715
lnc-MIXL1-2	SPATA21	-0.728065551
lnc-MLST8-1	SPATA21	-0.710560581
lnc-MLX-3	SPATA21	-0.776288543
lnc-MMP23B-1	SPATA21	-0.810285871
lnc-MMP23B-3	SPATA21	-0.738177409
lnc-MOCS2-3	SPATA21	-0.762180561
lnc-MPEG1-2	SPATA21	-0.750825217
lnc-MPHOSPH10-2	SPATA21	-0.744776085
lnc-MPI-1	SPATA21	-0.75903601
lnc-MPP7-8	SPATA21	0.722356237
lnc-MRC2-1	SPATA21	-0.811407805
lnc-MRPL39-20	SPATA21	-0.723954012
lnc-MRPL41-1	SPATA21	-0.695034176
lnc-MRPL47-2	SPATA21	-0.740110837
lnc-MRPL48-1	SPATA21	-0.740551526
lnc-MRPS16-1	SPATA21	-0.804785093
lnc-MRTO4-2	SPATA21	-0.816203332
lnc-MSI2-5	SPATA21	-0.911971152
lnc-MSMP-2	SPATA21	-0.91528663
lnc-MST1-2	SPATA21	-0.730110887
lnc-MTIF3-2	SPATA21	-0.881376281
lnc-MTMR2-2	SPATA21	-0.719604355
lnc-MTRR-7	SPATA21	-0.936785102
lnc-MUC20-10	SPATA21	-0.779629376
lnc-MYC-3	SPATA21	0.730978734
lnc-MYL12A-1	SPATA21	-0.763551443
lnc-MYL6-2	SPATA21	-0.91975794
lnc-NAA50-1	SPATA21	-0.78134119
lnc-NAA50-3	SPATA21	-0.700515202
lnc-NAA60-1	SPATA21	-0.717346237
lnc-NBAS-15	SPATA21	-0.875680413
lnc-NDE1-3	SPATA21	-0.691136936
lnc-NDUFAF3-1	SPATA21	-0.796634142
lnc-NDUFS6-17	SPATA21	-0.743436781
lnc-NEK5-1	SPATA21	-0.734444756
lnc-NEURL4-1	SPATA21	-0.811492011
lnc-NFAT5-1	SPATA21	-0.76085466
lnc-NFKBIB-5	SPATA21	-0.823903157
lnc-NHSL1-2	SPATA21	-0.900420756
lnc-NID2-5	SPATA21	-0.847921573
lnc-NIN-1	SPATA21	0.70120267
lnc-NIPAL1-2	SPATA21	-0.698919507
lnc-NIPBL-1	SPATA21	-0.756299814
lnc-NLRP2-2	SPATA21	-0.757201172
lnc-NLRP3-4	SPATA21	-0.698417714
lnc-NMBR-2	SPATA21	0.761995535
lnc-NME6-2	SPATA21	-0.713263221
lnc-NMNAT1-3	SPATA21	-0.725654634
lnc-NPAS2-2	SPATA21	-0.920016959
lnc-NPAT-2	SPATA21	-0.885870025
lnc-NPB-3	SPATA21	-0.749048041
lnc-NR2F2-7	SPATA21	0.721508477
lnc-NSMCE1-1	SPATA21	-0.708400721
lnc-NUDT5-1	SPATA21	-0.749628248
lnc-OAZ3-4	SPATA21	0.840525364
lnc-OBSCN-3	SPATA21	-0.695597185
lnc-OLR1-3	SPATA21	-0.715116908
lnc-OR7C2-1	SPATA21	-0.755755634
lnc-ORC3-1	SPATA21	-0.921501249
lnc-ORC3-2	SPATA21	-0.93631811
lnc-OSBPL7-1	SPATA21	-0.702978251
lnc-OSBPL9-3	SPATA21	-0.824830377
lnc-OTP-2	SPATA21	0.700116849
lnc-OTP-5	SPATA21	-0.740989354
lnc-OTUD6B-1	SPATA21	-0.74853122
lnc-OTUD6B-2	SPATA21	-0.716108834
lnc-OXNAD1-6	SPATA21	-0.735072212
lnc-P4HA3-1	SPATA21	-0.904896441
lnc-PADI1-1	SPATA21	0.903481031
lnc-PADI4-2	SPATA21	-0.747817523
lnc-PARN-10	SPATA21	-0.950136832
lnc-PARN-14	SPATA21	0.693700376
lnc-PCCA-2	SPATA21	-0.733190196
lnc-PCDH1-5	SPATA21	0.712767944
lnc-PCDH12-1	SPATA21	-0.72662509
lnc-PCM1-3	SPATA21	-0.750108882
lnc-PDGFRL-2	SPATA21	-0.717407745
lnc-PDZD7-1	SPATA21	-0.907399168
lnc-PEA15-1	SPATA21	-0.892308291
lnc-PER2-5	SPATA21	-0.712425572
lnc-PEX7-2	SPATA21	-0.938819602
lnc-PHB2-4	SPATA21	-0.797550638
lnc-PHRF1-1	SPATA21	-0.694526325
lnc-PIGB-2	SPATA21	-0.750515888
lnc-PINK1-2	SPATA21	-0.7578808
lnc-PKLR-1	SPATA21	-0.717753019
lnc-PLD3-3	SPATA21	-0.922397998
lnc-PMM2-1	SPATA21	-0.786372332
lnc-PNLIPRP1-1	SPATA21	-0.716311619
lnc-PNMA1-1	SPATA21	-0.902865486
lnc-PNMA2-1	SPATA21	-0.795852487
lnc-PNO1-1	SPATA21	-0.777621943
lnc-POC5-1	SPATA21	-0.778904925
lnc-PODXL-3	SPATA21	-0.745301571
lnc-POLR1E-4	SPATA21	-0.75383784
lnc-POTEB-5	SPATA21	0.693575013
lnc-PPIAL4C-9	SPATA21	-0.694593252
lnc-PPIF-1	SPATA21	-0.804808262
lnc-PPP1CB-1	SPATA21	-0.717778931
lnc-PPP1R14B-1	SPATA21	-0.693648845
lnc-PPP1R3B-11	SPATA21	-0.939679256
lnc-PPP4C-1	SPATA21	-0.787765513
lnc-PPP4C-8	SPATA21	-0.963767212
lnc-PPP4R1-18	SPATA21	-0.697931024
lnc-PPP4R1L-1	SPATA21	-0.753613563
lnc-PRL-13	SPATA21	-0.772263001
lnc-PRR15L-3	SPATA21	-0.787916564
lnc-PRR15L-6	SPATA21	-0.830870066
lnc-PSMB11-1	SPATA21	-0.73465715
lnc-PSME1-1	SPATA21	-0.839020452
lnc-PTDSS1-1	SPATA21	-0.695585012
lnc-PTGDR2-1	SPATA21	-0.750561595
lnc-PTGDR2-2	SPATA21	-0.796434916
lnc-RAB17-2	SPATA21	-0.877788113
lnc-RAB3A-3	SPATA21	-0.70129382
lnc-RABL2A-5	SPATA21	-0.694953067
lnc-RAD9B-1	SPATA21	-0.698018777
lnc-RADIL-1	SPATA21	-0.7020629
lnc-RC3H1-1	SPATA21	-0.714633436
lnc-RCC1-6	SPATA21	0.857793629
lnc-RELL2-1	SPATA21	-0.909906839
lnc-REM2-2	SPATA21	-0.802434498
lnc-RFC4-1	SPATA21	-0.771952515
lnc-RHBDF1-1	SPATA21	-0.705483612
lnc-RHOC-1	SPATA21	-0.816326007
lnc-RIC8A-1	SPATA21	-0.775269317
lnc-RNF113B-2	SPATA21	-0.686301164
lnc-RNF121-5	SPATA21	-0.719459875
lnc-RNF146-2	SPATA21	-0.702255337
lnc-RNF166-1	SPATA21	-0.771698642
lnc-RNF208-1	SPATA21	-0.712519304
lnc-RNF40-1	SPATA21	-0.740997322
lnc-ROS1-2	SPATA21	0.797621189
lnc-RP11-116D17.1.1-4	SPATA21	0.797977199
lnc-RP11-210M15.2.1-6	SPATA21	-0.795386006
lnc-RP11-498D10.4.1-1	SPATA21	-0.808912188
lnc-RP11-884K10.5.1-2	SPATA21	0.692613857
lnc-RPL14-2	SPATA21	-0.890958396
lnc-RPS27L-1	SPATA21	-0.723688477
lnc-RRP8-1	SPATA21	-0.735918053
lnc-RUNDC3A-1	SPATA21	-0.79067106
lnc-S100A7A-1	SPATA21	0.697498787
lnc-S1PR2-2	SPATA21	-0.800261446
lnc-SAFB-1	SPATA21	-0.728163189
lnc-SBF2-4	SPATA21	-0.755333085
lnc-SCAND1-5	SPATA21	-0.793237256
lnc-SCGB1D4-1	SPATA21	-0.79968657
lnc-SCGB2B2-7	SPATA21	0.688360182
lnc-SCML4-1	SPATA21	0.705030089
lnc-SCN2A-6	SPATA21	-0.726739163
lnc-SCNN1B-1	SPATA21	-0.746619078
lnc-SCRN1-2	SPATA21	0.72547972
lnc-SEBOX-1	SPATA21	-0.693555709
lnc-SEC22C-2	SPATA21	-0.712092066
lnc-SEC23A-3	SPATA21	-0.755688525
lnc-SEC24B-1	SPATA21	0.81075812
lnc-SEMA4B-2	SPATA21	-0.688829745
lnc-SENP6-12	SPATA21	-0.688205511
lnc-SETD1B-3	SPATA21	-0.775395592
lnc-SETD8-1	SPATA21	-0.839685157
lnc-SGCG-11	SPATA21	-0.822796718
lnc-SGSH-1	SPATA21	-0.693547941
lnc-SGSM2-1	SPATA21	-0.703886638
lnc-SH3BGRL2-9	SPATA21	-0.713577937
lnc-SH3RF2-1	SPATA21	-0.740277687
lnc-SHANK2-3	SPATA21	-0.72750579
lnc-SHARPIN-4	SPATA21	-0.834965585
lnc-SIGLEC16-4	SPATA21	-0.756350744
lnc-SIVA1-1	SPATA21	-0.861515544
lnc-SLA2-1	SPATA21	-0.753182615
lnc-SLC22A23-1	SPATA21	-0.942429415
lnc-SLC25A21-4	SPATA21	-0.725884019
lnc-SLC25A29-1	SPATA21	-0.872774963
lnc-SLC25A31-2	SPATA21	-0.820029141
lnc-SLC25A47-2	SPATA21	-0.780910413
lnc-SLC25A47-5	SPATA21	-0.724596784
lnc-SLC2A6-2	SPATA21	-0.727247393
lnc-SLC38A8-9	SPATA21	-0.726220439
lnc-SLC39A10-10	SPATA21	-0.746449296
lnc-SLC3A2-1	SPATA21	-0.741660298
lnc-SLC3A2-3	SPATA21	-0.695352796
lnc-SLC46A2-1	SPATA21	-0.753568294
lnc-SLC4A10-2	SPATA21	-0.760405236
lnc-SLC7A6OS-2	SPATA21	-0.72719542
lnc-SLCO2B1-2	SPATA21	-0.772578022
lnc-SMARCC2-5	SPATA21	-0.702659123
lnc-SNN-5	SPATA21	-0.708454078
lnc-SNTG2-3	SPATA21	-0.75725027
lnc-SNX33-1	SPATA21	-0.68952324
lnc-SNX33-2	SPATA21	-0.702775884
lnc-SP110-5	SPATA21	-0.751064092
lnc-SP140-3	SPATA21	-0.82410396
lnc-SP3-1	SPATA21	0.76120422
lnc-SPATA21-3	SPATA21	-0.753099983
lnc-SPATA9-1	SPATA21	-0.733291197
lnc-SPIN3-5	SPATA21	-0.727442559
lnc-SPINT2-2	SPATA21	0.686950701
lnc-SPRED2-11	SPATA21	-0.752940894
lnc-SPRYD3-1	SPATA21	-0.818188037
lnc-SPTBN5-1	SPATA21	-0.95703254
lnc-SRA1-3	SPATA21	-0.800382509
lnc-SRPRB-1	SPATA21	-0.780262681
lnc-SRPX2-2	SPATA21	-0.875976285
lnc-SRSF5-2	SPATA21	-0.908587489
lnc-SSBP4-2	SPATA21	-0.868796702
lnc-ST7L-1	SPATA21	-0.742650677
lnc-ST7L-3	SPATA21	-0.906709651
lnc-STAG3L4-5	SPATA21	-0.722419022
lnc-STAP1-12	SPATA21	-0.739014181
lnc-SYCP1-1	SPATA21	0.849255497
lnc-SYNM-2	SPATA21	-0.957496749
lnc-SYT15-3	SPATA21	-0.772159618
lnc-TAF13-2	SPATA21	-0.715346071
lnc-TAS2R42-1	SPATA21	-0.725868744
lnc-TATDN1-2	SPATA21	-0.727048352
lnc-TBC1D17-1	SPATA21	-0.910212384
lnc-TCTA-1	SPATA21	-0.883282947
lnc-TEFM-5	SPATA21	-0.783970142
lnc-TFAP2C-4	SPATA21	0.743862463
lnc-THBS4-1	SPATA21	-0.70785148
lnc-THRSP-2	SPATA21	-0.714581825
lnc-THSD4-4	SPATA21	-0.751208033
lnc-THUMPD3-4	SPATA21	-0.698350088
lnc-TLCD1-3	SPATA21	-0.759974914
lnc-TLE2-1	SPATA21	-0.872183598
lnc-TM2D2-1	SPATA21	-0.744699813
lnc-TMBIM1-3	SPATA21	-0.751981517
lnc-TMC5-1	SPATA21	-0.724427073
lnc-TMEM116-1	SPATA21	-0.829369561
lnc-TMEM156-1	SPATA21	-0.718954847
lnc-TMEM194B-6	SPATA21	-0.725951421
lnc-TMEM22-2	SPATA21	-0.71465852
lnc-TMEM232-4	SPATA21	-0.843735814
lnc-TMEM234-4	SPATA21	-0.698028621
lnc-TMEM43-1	SPATA21	-0.715908948
lnc-TMEM50B-2	SPATA21	-0.790350113
lnc-TMEM50B-3	SPATA21	-0.791620117
lnc-TMEM75-8	SPATA21	0.775631826
lnc-TMEM85-2	SPATA21	-0.742033989
lnc-TMEM98-2	SPATA21	-0.779307772
lnc-TMPRSS2-1	SPATA21	-0.924268025
lnc-TMUB2-1	SPATA21	-0.884264218
lnc-TMUB2-2	SPATA21	-0.746781286
lnc-TNFRSF1A-3	SPATA21	-0.860848515
lnc-TNN-1	SPATA21	-0.744437133
lnc-TNNT1-1	SPATA21	0.717330284
lnc-TNP1-6	SPATA21	0.759174701
lnc-TOP1MT-5	SPATA21	-0.947198602
lnc-TOR1AIP1-1	SPATA21	-0.867849029
lnc-TOR1AIP1-2	SPATA21	-0.768653277
lnc-TOR1AIP2-5	SPATA21	-0.72686766
lnc-TOR3A-1	SPATA21	-0.765448411
lnc-TRAFD1-1	SPATA21	-0.699465956
lnc-TRAPPC12-1	SPATA21	-0.911436133
lnc-TRAPPC2L-1	SPATA21	-0.949907063
lnc-TRAPPC4-1	SPATA21	-0.95708041
lnc-TRIAP1-2	SPATA21	-0.895383327
lnc-TSC1-1	SPATA21	-0.811798218
lnc-TSPYL4-1	SPATA21	-0.757745851
lnc-TTYH3-2	SPATA21	-0.731002538
lnc-TUBA1C-3	SPATA21	-0.931849536
lnc-TUBGCP4-1	SPATA21	-0.757761214
lnc-TUBGCP6-5	SPATA21	-0.745825617
lnc-TUFM-1	SPATA21	-0.949594243
lnc-TUSC5-5	SPATA21	-0.876270102
lnc-TYMS-1	SPATA21	-0.730254226
lnc-TYW1-1	SPATA21	-0.761466841
lnc-UBC-1	SPATA21	0.691526682
lnc-UBE3A-6	SPATA21	-0.725950353
lnc-UGP2-4	SPATA21	-0.730430402
lnc-ULBP3-5	SPATA21	0.730686234
lnc-UMODL1-7	SPATA21	-0.754543424
lnc-UNC93A-3	SPATA21	-0.751191581
lnc-USP35-3	SPATA21	-0.78267483
lnc-USP37-1	SPATA21	-0.741293344
lnc-USP50-1	SPATA21	-0.740949637
lnc-USPL1-2	SPATA21	0.779452386
lnc-UTP11L-3	SPATA21	0.832604609
lnc-VAT1-1	SPATA21	-0.801883425
lnc-VN1R2-3	SPATA21	-0.750863455
lnc-VN1R2-8	SPATA21	-0.951473331
lnc-VSTM2B-9	SPATA21	-0.700147906
lnc-VTCN1-3	SPATA21	-0.850157037
lnc-VWDE-1	SPATA21	-0.821028596
lnc-WDPCP-2	SPATA21	-0.723814091
lnc-WDR41-1	SPATA21	-0.696447141
lnc-WDR73-9	SPATA21	-0.927109936
lnc-WNT8A-2	SPATA21	-0.788438224
lnc-XPOT-4	SPATA21	0.734448595
lnc-XRCC6-1	SPATA21	-0.704020654
lnc-YIF1A-4	SPATA21	-0.741989068
lnc-ZBED4-1	SPATA21	-0.870114034
lnc-ZBTB25-2	SPATA21	-0.754963058
lnc-ZC3H12B-12	SPATA21	-0.715459063
lnc-ZCCHC24-7	SPATA21	-0.755995438
lnc-ZFAND1-1	SPATA21	-0.815155228
lnc-ZFAND3-4	SPATA21	-0.745704226
lnc-ZFAT-6	SPATA21	0.689208069
lnc-ZFC3H1-5	SPATA21	0.704122087
lnc-ZFYVE9-1	SPATA21	-0.841285994
lnc-ZNF131-10	SPATA21	-0.900154334
lnc-ZNF146-1	SPATA21	-0.968759606
lnc-ZNF235-2	SPATA21	-0.70637158
lnc-ZNF257-5	SPATA21	-0.758789904
lnc-ZNF394-2	SPATA21	-0.687662804
lnc-ZNF423-3	SPATA21	-0.911890958
lnc-ZNF44-1	SPATA21	-0.826219326
lnc-ZNF45-4	SPATA21	-0.713642693
lnc-ZNF506-2	SPATA21	-0.760048228
lnc-ZNF514-2	SPATA21	-0.950828367
lnc-ZNF575-1	SPATA21	-0.790102473
lnc-ZNF582-3	SPATA21	-0.781909308
lnc-ZNF681-2	SPATA21	-0.730734997
lnc-ZNF681-4	SPATA21	-0.763071011
lnc-ZNF687-1	SPATA21	-0.718047179
lnc-ZNF701-2	SPATA21	-0.7703443
lnc-ZNF724P-2	SPATA21	0.780961415
lnc-ZNF738-5	SPATA21	-0.770539304
lnc-ZNF780B-1	SPATA21	-0.738867445
lnc-ZNF791-3	SPATA21	-0.825596899
lnc-ZNF814-1	SPATA21	-0.776860742
lnc-ZNF83-4	SPATA21	-0.774825035
lnc-ZNF83-6	SPATA21	-0.828299535
lnc-ZSCAN2-5	SPATA21	-0.72208147
lnc-ZXDA-1	SPATA21	-0.781093032
MCCC1-AS1	SPATA21	-0.728812018
MCM3AP-AS1	SPATA21	-0.693037391
MORC2-AS1	SPATA21	-0.761512209
MYLK-AS1	SPATA21	-0.739611045
NCBP2-AS1	SPATA21	-0.724221028
PCBP1-AS1	SPATA21	-0.811287442
PITPNA-AS1	SPATA21	-0.771065743
PLCE1-AS2	SPATA21	0.795355883
RAP2C-AS1	SPATA21	-0.737156077
SBF2-AS1	SPATA21	-0.910340036
SEMA3F-AS1	SPATA21	-0.723317001
SNAP25-AS1	SPATA21	-0.726982561
SPAG5-AS1	SPATA21	-0.709782536
SRRM2-AS1	SPATA21	-0.74885811
STARD4-AS1	SPATA21	-0.705153239
TESC-AS1	SPATA21	-0.782312712
TMEM161B-AS1	SPATA21	0.769814988
TRAF3IP2-AS1	SPATA21	0.76735541
TRG-AS1	SPATA21	-0.697270964
TRIM52-AS1	SPATA21	-0.763312674
TSC22D1-AS1	SPATA21	-0.785249667
TTC3-AS1	SPATA21	-0.896883231
WDFY3-AS2	SPATA21	-0.886791871
XLOC_000090	SPATA21	-0.70491462
XLOC_000127	SPATA21	0.804164853
XLOC_000300	SPATA21	-0.731026944
XLOC_002818	SPATA21	-0.749306807
XLOC_004093	SPATA21	-0.818952977
XLOC_005400	SPATA21	-0.737020318
XLOC_005944	SPATA21	-0.909480915
XLOC_006446	SPATA21	-0.704460758
XLOC_1013783	SPATA21	-0.752035671
XLOC_1015300	SPATA21	-0.732257565
XLOC_1015575	SPATA21	-0.709777206
XLOC_1016089	SPATA21	-0.897861833
XLOC_1174150	SPATA21	-0.770629232
XLOC_1175511	SPATA21	-0.862573963
XLOC_1175795	SPATA21	-0.756655423
XLOC_1176066	SPATA21	-0.758011942
XLOC_1176366	SPATA21	-0.728031775
XLOC_1176618	SPATA21	-0.908186258
XLOC_1176619	SPATA21	-0.748132062
XLOC_1176816	SPATA21	-0.715649891
XLOC_1176877	SPATA21	-0.922667889
XLOC_1229860	SPATA21	0.713192443
XLOC_1231971	SPATA21	-0.888200045
XLOC_1232514	SPATA21	-0.730629695
XLOC_1233095	SPATA21	-0.77305683
XLOC_1236338	SPATA21	-0.708590703
XLOC_1483319	SPATA21	0.842893879
XLOC_1483332	SPATA21	-0.751646113
XLOC_1484828	SPATA21	-0.761810613
XLOC_1585364	SPATA21	-0.71591003
XLOC_1621025	SPATA21	0.721043815
XLOC_1621861	SPATA21	-0.938692783
XLOC_1622314	SPATA21	-0.905278819
XLOC_1622484	SPATA21	-0.722745675
XLOC_1623353	SPATA21	-0.758960158
XLOC_1623377	SPATA21	-0.956175358
XLOC_1623407	SPATA21	-0.696345616
XLOC_1623935	SPATA21	-0.841152842
XLOC_1625271	SPATA21	-0.710441619
XLOC_1828024	SPATA21	0.720527921
XLOC_1828067	SPATA21	-0.70968829
XLOC_2029264	SPATA21	-0.688525244
XLOC_2030250	SPATA21	-0.792338537
XLOC_2217124	SPATA21	0.76296109
XLOC_2217240	SPATA21	-0.945226474
XLOC_2220896	SPATA21	-0.868745982
XLOC_2557495	SPATA21	-0.841673251
XLOC_2558149	SPATA21	-0.764207018
XLOC_2559906	SPATA21	-0.708284866
XLOC_2712490	SPATA21	-0.933696901
XLOC_2712800	SPATA21	-0.906522212
XLOC_2712801	SPATA21	-0.829885304
XLOC_2714659	SPATA21	-0.777658614
XLOC_2835377	SPATA21	0.697315999
XLOC_2835378	SPATA21	0.773020404
XLOC_2837916	SPATA21	0.784081351
XLOC_2838591	SPATA21	-0.752671303
XLOC_2839990	SPATA21	0.861950915
XLOC_2993599	SPATA21	0.904145918
XLOC_375822	SPATA21	-0.744941276
XLOC_376348	SPATA21	-0.693265358
XLOC_378168	SPATA21	-0.828231962
XLOC_514233	SPATA21	-0.69928103
XLOC_514513	SPATA21	-0.924090809
XLOC_515042	SPATA21	-0.917792571
XLOC_515583	SPATA21	-0.687761095
XLOC_515758	SPATA21	-0.72445348
XLOC_516712	SPATA21	-0.752327543
XLOC_651258	SPATA21	-0.695696698
XLOC_753553	SPATA21	-0.769369415
XLOC_753809	SPATA21	-0.953043884
XLOC_754873	SPATA21	-0.793798313
XLOC_846292	SPATA21	-0.689839991
XLOC_847052	SPATA21	-0.786260793
XLOC_847150	SPATA21	-0.899646138
XLOC_847555	SPATA21	-0.716126941
XLOC_931187	SPATA21	-0.893589187
XLOC_932037	SPATA21	-0.733064768
XLOC_932070	SPATA21	-0.814524534
XLOC_932582	SPATA21	-0.795309084
XLOC_934016	SPATA21	-0.691591691
ZBED5-AS1	SPATA21	0.749024879
ZNF571-AS1	SPATA21	-0.818990389
ZSCAN16-AS1	SPATA21	-0.71799524
DIO3OS	LHCGR	0.868804771
DLGAP4-AS1	LHCGR	-0.83616406
GMDS-AS1	LHCGR	0.698108933
H1FX-AS1	LHCGR	-0.790516845
HOXA10-AS	LHCGR	-0.845102957
LINC-PINT	LHCGR	0.731628783
LINC00390	LHCGR	0.761733301
LINC00466	LHCGR	0.686984493
LINC00526	LHCGR	-0.737744124
LINC00842	LHCGR	0.747082011
LINC00890	LHCGR	-0.781051507
LINC00943	LHCGR	0.694913116
LINC00959	LHCGR	0.746770008
LINC01270	LHCGR	0.88433015
LINC01535	LHCGR	0.863816926
LINC01550	LHCGR	0.712943621
lnc-AC011443.1-4	LHCGR	-0.709247993
lnc-AC011551.1-1	LHCGR	-0.751018183
lnc-AC019294.2-1	LHCGR	0.816225408
lnc-AC073416.2-11	LHCGR	0.921935002
lnc-ACMSD-6	LHCGR	0.958858109
lnc-ACY1-2	LHCGR	-0.738256671
lnc-ADAMTS16-2	LHCGR	0.96727052
lnc-AL033381.1-4	LHCGR	0.724150492
lnc-AL033381.1-8	LHCGR	0.834952063
lnc-ALX4-7	LHCGR	-0.690773418
lnc-ANAPC11-2	LHCGR	-0.733459745
lnc-ANKRD50-3	LHCGR	0.866988652
lnc-APEX1-2	LHCGR	0.746256185
lnc-ARF6-1	LHCGR	-0.712313962
lnc-ARL6IP5-1	LHCGR	-0.924283128
lnc-ASB5-1	LHCGR	-0.706061388
lnc-ATF7IP2-1	LHCGR	-0.725955122
lnc-ATP1B3-2	LHCGR	-0.715371855
lnc-BARHL2-4	LHCGR	0.771192726
lnc-BLID-7	LHCGR	-0.695010584
lnc-BMS1-10	LHCGR	0.782946584
lnc-BOD1-1	LHCGR	0.829894513
lnc-BRI3-1	LHCGR	-0.733177995
lnc-C10orf103-1	LHCGR	-0.726497109
lnc-C10orf28-2	LHCGR	0.795816442
lnc-C10orf28-5	LHCGR	-0.687418579
lnc-C17orf63-2	LHCGR	-0.720994786
lnc-C19orf26-2	LHCGR	-0.794131152
lnc-C1orf201-5	LHCGR	-0.732700856
lnc-C1orf43-4	LHCGR	-0.725526646
lnc-C6orf146-3	LHCGR	0.766572397
lnc-C6orf201-11	LHCGR	0.744197788
lnc-C7orf23-2	LHCGR	-0.834055898
lnc-C8orf83-1	LHCGR	0.865752528
lnc-C9orf50-2	LHCGR	-0.844818221
lnc-CACNA2D3-2	LHCGR	0.779342919
lnc-CALHM1-1	LHCGR	0.696701458
lnc-CCDC127-2	LHCGR	0.758834156
lnc-CCDC68-1	LHCGR	-0.731754325
lnc-CD226-5	LHCGR	0.721997454
lnc-CDIPT-1	LHCGR	-0.702288086
lnc-CDK12-1	LHCGR	0.726194942
lnc-CDYL2-6	LHCGR	0.73121289
lnc-CEMP1-5	LHCGR	-0.749443596
lnc-CHAD-3	LHCGR	-0.720052649
lnc-CHRAC1-3	LHCGR	-0.888398632
lnc-CHRAC1-7	LHCGR	-0.68629633
lnc-CHSY1-5	LHCGR	-0.724034374
lnc-CIB1-3	LHCGR	-0.901381068
lnc-CLMP-8	LHCGR	0.787427277
lnc-CLVS1-1	LHCGR	0.706553015
lnc-CRBN-1	LHCGR	0.833809355
lnc-CTNS-1	LHCGR	-0.698933734
lnc-DISC1-1	LHCGR	0.752226586
lnc-DNAH5-4	LHCGR	0.782431644
lnc-DNASE1L1-1	LHCGR	-0.777355096
lnc-DOC2B-3	LHCGR	0.937365699
lnc-DPY30-4	LHCGR	0.954313105
[truncated: 2,641 more rows]
