# Supplementary material for: LncRNAs induce oxidative stress and spermatogenesis by regulating endoplasmic reticulum genes and pathways
Source: Aging (Albany NY). 2021 May 6;13(10):13764–87. doi: 10.18632/aging.202971 (PMC8202879; doi:10.18632/aging.202971)
Supplement: Supplementary Table 14 [file aging-13-202971-s014.csv]

Supplementary Table 14. cis_trans_top.
lncrna	mrna	chr_mrna	start_mrna	end_mrna	diff_mrna	chr_lncrna	start_lncrna	end_lncrna	sub_lncrna	diff_lncrna	uplim	downlim	regulation
lnc-AP3S1-15	ADAMTS6	chr5	64444563	64777747	Down	chr5	114598201	114599145	Antisense	Up	114298201	114899145	trans
lnc-AP3S1-15	ADPRM	chr17	10600911	10614550	Up	chr5	114598201	114599145	Antisense	Up	114298201	114899145	trans
lnc-AP3S1-15	AFTPH	chr2	64751465	64820139	Up	chr5	114598201	114599145	Antisense	Up	114298201	114899145	trans
lnc-AP3S1-15	AIMP2	chr7	6048876	6063465	Up	chr5	114598201	114599145	Antisense	Up	114298201	114899145	trans
lnc-AP3S1-15	ANGPTL6	chr19	10203014	10213472	Up	chr5	114598201	114599145	Antisense	Up	114298201	114899145	trans
lnc-AP3S1-15	ANKRD37	chr4	186317175	186321782	Up	chr5	114598201	114599145	Antisense	Up	114298201	114899145	trans
lnc-AP3S1-15	ASPH	chr8	62413116	62627155	Down	chr5	114598201	114599145	Antisense	Up	114298201	114899145	trans
lnc-AP3S1-15	ATF5	chr19	50431959	50437192	Up	chr5	114598201	114599145	Antisense	Up	114298201	114899145	trans
lnc-AP3S1-15	ATRNL1	chr10	116853124	117708503	Down	chr5	114598201	114599145	Antisense	Up	114298201	114899145	trans
lnc-AP3S1-15	BANF1	chr11	65769550	65771620	Up	chr5	114598201	114599145	Antisense	Up	114298201	114899145	trans
lnc-AP3S1-15	BCAS2	chr1	115110178	115124260	Up	chr5	114598201	114599145	Antisense	Up	114298201	114899145	trans
lnc-AP3S1-15	BID	chr22	18216906	18257536	Up	chr5	114598201	114599145	Antisense	Up	114298201	114899145	trans
lnc-AP3S1-15	BUD31	chr7	99006264	99017239	Up	chr5	114598201	114599145	Antisense	Up	114298201	114899145	trans
lnc-AP3S1-15	C15orf40	chr15	83657193	83680393	Up	chr5	114598201	114599145	Antisense	Up	114298201	114899145	trans
lnc-AP3S1-15	C1orf192	chr1	161334521	161337664	Up	chr5	114598201	114599145	Antisense	Up	114298201	114899145	trans
lnc-AP3S1-15	C3orf18	chr3	50595462	50608458	Up	chr5	114598201	114599145	Antisense	Up	114298201	114899145	trans
lnc-AP3S1-15	C6orf52	chr6	10671651	10695030	Up	chr5	114598201	114599145	Antisense	Up	114298201	114899145	trans
lnc-AP3S1-15	CA4	chr17	58227297	58248260	Down	chr5	114598201	114599145	Antisense	Up	114298201	114899145	trans
lnc-AP3S1-15	CABP7	chr22	30116073	30127828	Up	chr5	114598201	114599145	Antisense	Up	114298201	114899145	trans
lnc-AP3S1-15	CCDC23	chr1	43272723	43282954	Up	chr5	114598201	114599145	Antisense	Up	114298201	114899145	trans
lnc-AP3S1-15	CEBPZ	chr2	37428755	37458856	Up	chr5	114598201	114599145	Antisense	Up	114298201	114899145	trans
lnc-AP3S1-15	CFL1	chr11	65590493	65629497	Up	chr5	114598201	114599145	Antisense	Up	114298201	114899145	trans
lnc-AP3S1-15	CHMP4B	chr20	32399110	32442172	Up	chr5	114598201	114599145	Antisense	Up	114298201	114899145	trans
lnc-AP3S1-15	CIB4	chr2	26804070	26864236	Down	chr5	114598201	114599145	Antisense	Up	114298201	114899145	trans
lnc-AP3S1-15	CIPC	chr14	77564440	77583630	Up	chr5	114598201	114599145	Antisense	Up	114298201	114899145	trans
lnc-AP3S1-15	CORO1B	chr11	67205519	67211292	Up	chr5	114598201	114599145	Antisense	Up	114298201	114899145	trans
lnc-AP3S1-15	COX20	chr1	244998624	245008359	Up	chr5	114598201	114599145	Antisense	Up	114298201	114899145	trans
lnc-AP3S1-15	CPED1	chr7	120628731	120937498	Down	chr5	114598201	114599145	Antisense	Up	114298201	114899145	trans
lnc-AP3S1-15	CPSF4L	chr17	71244588	71258491	Up	chr5	114598201	114599145	Antisense	Up	114298201	114899145	trans
lnc-AP3S1-15	CSNK1A1	chr5	148872949	148884233	Up	chr5	114598201	114599145	Antisense	Up	114298201	114899145	trans
lnc-AP3S1-15	EFCAB10	chr7	105565108	105581542	Up	chr5	114598201	114599145	Antisense	Up	114298201	114899145	trans
lnc-AP3S1-15	EIF2A	chr3	150264465	150302029	Up	chr5	114598201	114599145	Antisense	Up	114298201	114899145	trans
lnc-AP3S1-15	EME1	chr17	48450581	48458844	Up	chr5	114598201	114599145	Antisense	Up	114298201	114899145	trans
lnc-AP3S1-15	FAM104A	chr17	71203492	71232892	Up	chr5	114598201	114599145	Antisense	Up	114298201	114899145	trans
lnc-AP3S1-15	FAM219B	chr15	75192328	75199462	Up	chr5	114598201	114599145	Antisense	Up	114298201	114899145	trans
lnc-AP3S1-15	FAM69B	chr9	139607022	139618502	Up	chr5	114598201	114599145	Antisense	Up	114298201	114899145	trans
lnc-AP3S1-15	FLJ30403	chr19	51591783	51594380	Up	chr5	114598201	114599145	Antisense	Up	114298201	114899145	trans
lnc-AP3S1-15	GGACT	chr13	101183810	101241782	Up	chr5	114598201	114599145	Antisense	Up	114298201	114899145	trans
lnc-AP3S1-15	GPR26	chr10	125425871	125454123	Down	chr5	114598201	114599145	Antisense	Up	114298201	114899145	trans
lnc-AP3S1-15	GTF2IRD1P1	chr7	66274980	66309813	Up	chr5	114598201	114599145	Antisense	Up	114298201	114899145	trans
lnc-AP3S1-15	HIF1A	chr14	62162231	62214976	Up	chr5	114598201	114599145	Antisense	Up	114298201	114899145	trans
lnc-AP3S1-15	HMGN2P46	chr15	45803334	45878488	Up	chr5	114598201	114599145	Antisense	Up	114298201	114899145	trans
lnc-AP3S1-15	HNRNPA3	chr2	178077291	178088686	Up	chr5	114598201	114599145	Antisense	Up	114298201	114899145	trans
lnc-AP3S1-15	HOXA10	chr7	27210210	27219880	Up	chr5	114598201	114599145	Antisense	Up	114298201	114899145	trans
lnc-AP3S1-15	HSD17B4	chr5	118788138	118972894	Up	chr5	114598201	114599145	Antisense	Up	114298201	114899145	trans
lnc-AP3S1-15	IAH1	chr2	9613787	9636672	Up	chr5	114598201	114599145	Antisense	Up	114298201	114899145	trans
lnc-AP3S1-15	ISOC1	chr5	128430444	128449721	Up	chr5	114598201	114599145	Antisense	Up	114298201	114899145	trans
lnc-AP3S1-15	KCP	chr7	128870645	128910719	Down	chr5	114598201	114599145	Antisense	Up	114298201	114899145	trans
lnc-AP3S1-15	KIF7	chr15	90152020	90198682	Down	chr5	114598201	114599145	Antisense	Up	114298201	114899145	trans
lnc-AP3S1-15	KRTCAP3	chr2	27665233	27669348	Up	chr5	114598201	114599145	Antisense	Up	114298201	114899145	trans
lnc-AP3S1-15	LAMTOR5	chr1	110943871	110950564	Up	chr5	114598201	114599145	Antisense	Up	114298201	114899145	trans
lnc-AP3S1-15	LOC101928371	chr2	88538720	88575610	Up	chr5	114598201	114599145	Antisense	Up	114298201	114899145	trans
lnc-AP3S1-15	LRRC20	chr10	72058729	72142382	Down	chr5	114598201	114599145	Antisense	Up	114298201	114899145	trans
lnc-AP3S1-15	MARCKSL1	chr1	32799433	32801980	Up	chr5	114598201	114599145	Antisense	Up	114298201	114899145	trans
lnc-AP3S1-15	MEA1	chr6	42979832	42981706	Up	chr5	114598201	114599145	Antisense	Up	114298201	114899145	trans
lnc-AP3S1-15	MED31	chr17	6546635	6554954	Up	chr5	114598201	114599145	Antisense	Up	114298201	114899145	trans
lnc-AP3S1-15	METTL5	chr2	170666591	170681441	Up	chr5	114598201	114599145	Antisense	Up	114298201	114899145	trans
lnc-AP3S1-15	MFSD4	chr1	205538013	205572046	Up	chr5	114598201	114599145	Antisense	Up	114298201	114899145	trans
lnc-AP3S1-15	MIPOL1	chr14	37667118	38021566	Up	chr5	114598201	114599145	Antisense	Up	114298201	114899145	trans
lnc-AP3S1-15	MTIF3	chr13	28009776	28024739	Up	chr5	114598201	114599145	Antisense	Up	114298201	114899145	trans
lnc-AP3S1-15	MTOR-AS1	chr1	11203955	11209594	Up	chr5	114598201	114599145	Antisense	Up	114298201	114899145	trans
lnc-AP3S1-15	NANOS1	chr10	120789228	120793854	Up	chr5	114598201	114599145	Antisense	Up	114298201	114899145	trans
lnc-AP3S1-15	NAPEPLD	chr7	102740223	102790007	Up	chr5	114598201	114599145	Antisense	Up	114298201	114899145	trans
lnc-AP3S1-15	PEX11A	chr15	90220995	90234014	Up	chr5	114598201	114599145	Antisense	Up	114298201	114899145	trans
lnc-AP3S1-15	PLEKHM2	chr1	16010827	16061264	Down	chr5	114598201	114599145	Antisense	Up	114298201	114899145	trans
lnc-AP3S1-15	PPIB	chr15	64448011	64455404	Up	chr5	114598201	114599145	Antisense	Up	114298201	114899145	trans
lnc-AP3S1-15	PPP2CA	chr5	133530025	133561833	Up	chr5	114598201	114599145	Antisense	Up	114298201	114899145	trans
lnc-AP3S1-15	PRDX1	chr1	45976708	45988719	Up	chr5	114598201	114599145	Antisense	Up	114298201	114899145	trans
lnc-AP3S1-15	PRICKLE1	chr12	42852140	42984157	Down	chr5	114598201	114599145	Antisense	Up	114298201	114899145	trans
lnc-AP3S1-15	PSMC3IP	chr17	40724333	40729849	Up	chr5	114598201	114599145	Antisense	Up	114298201	114899145	trans
lnc-AP3S1-15	RAB11B	chr19	8454865	8469318	Up	chr5	114598201	114599145	Antisense	Up	114298201	114899145	trans
lnc-AP3S1-15	RAB7A	chr3	128444965	128533639	Up	chr5	114598201	114599145	Antisense	Up	114298201	114899145	trans
lnc-AP3S1-15	RAF1	chr3	12625100	12705725	Up	chr5	114598201	114599145	Antisense	Up	114298201	114899145	trans
lnc-AP3S1-15	RAP1B	chr12	69004619	69054372	Up	chr5	114598201	114599145	Antisense	Up	114298201	114899145	trans
lnc-AP3S1-15	RBM39	chr20	34291531	34330234	Up	chr5	114598201	114599145	Antisense	Up	114298201	114899145	trans
lnc-AP3S1-15	RFK	chr9	79000433	79009433	Up	chr5	114598201	114599145	Antisense	Up	114298201	114899145	trans
lnc-AP3S1-15	RFPL1	chr22	29834572	29838444	Up	chr5	114598201	114599145	Antisense	Up	114298201	114899145	trans
lnc-AP3S1-15	RNMTL1	chr17	685513	695749	Up	chr5	114598201	114599145	Antisense	Up	114298201	114899145	trans
lnc-AP3S1-15	RPL12	chr9	130209953	130213684	Up	chr5	114598201	114599145	Antisense	Up	114298201	114899145	trans
lnc-AP3S1-15	RPL35A	chr3	197676858	197683481	Up	chr5	114598201	114599145	Antisense	Up	114298201	114899145	trans
lnc-AP3S1-15	SERPINH1	chr11	75273101	75283828	Down	chr5	114598201	114599145	Antisense	Up	114298201	114899145	trans
lnc-AP3S1-15	SH3BP4	chr2	235860617	235964358	Up	chr5	114598201	114599145	Antisense	Up	114298201	114899145	trans
lnc-AP3S1-15	SLC25A5	chrX	118602363	118605282	Up	chr5	114598201	114599145	Antisense	Up	114298201	114899145	trans
lnc-AP3S1-15	SLC2A4	chr17	7184986	7191576	Down	chr5	114598201	114599145	Antisense	Up	114298201	114899145	trans
lnc-AP3S1-15	SNF8	chr17	47006678	47022479	Up	chr5	114598201	114599145	Antisense	Up	114298201	114899145	trans
lnc-AP3S1-15	SRSF2	chr17	74730197	74733456	Up	chr5	114598201	114599145	Antisense	Up	114298201	114899145	trans
lnc-AP3S1-15	SRSF9	chr12	120899471	120907596	Up	chr5	114598201	114599145	Antisense	Up	114298201	114899145	trans
lnc-AP3S1-15	SSU72	chr1	1477053	1510249	Up	chr5	114598201	114599145	Antisense	Up	114298201	114899145	trans
lnc-AP3S1-15	TACC3	chr4	1723227	1746898	Down	chr5	114598201	114599145	Antisense	Up	114298201	114899145	trans
lnc-AP3S1-15	TP53INP1	chr8	95938200	95961639	Up	chr5	114598201	114599145	Antisense	Up	114298201	114899145	trans
lnc-AP3S1-15	TRAPPC4	chr11	118889142	118896164	Up	chr5	114598201	114599145	Antisense	Up	114298201	114899145	trans
lnc-AP3S1-15	TSKU	chr11	76493295	76509198	Up	chr5	114598201	114599145	Antisense	Up	114298201	114899145	trans
lnc-AP3S1-15	USP3-AS1	chr15	63836446	63893788	Up	chr5	114598201	114599145	Antisense	Up	114298201	114899145	trans
lnc-AP3S1-15	UTY	chrY	15360259	15592553	Up	chr5	114598201	114599145	Antisense	Up	114298201	114899145	trans
lnc-AP3S1-15	VAMP3	chr1	7831329	7841492	Up	chr5	114598201	114599145	Antisense	Up	114298201	114899145	trans
lnc-AP3S1-15	YPEL5	chr2	30369807	30383399	Up	chr5	114598201	114599145	Antisense	Up	114298201	114899145	trans
lnc-AP3S1-15	ZNF3	chr7	99661656	99680171	Up	chr5	114598201	114599145	Antisense	Up	114298201	114899145	trans
lnc-AP3S1-15	ZNF350	chr19	52467596	52490109	Up	chr5	114598201	114599145	Antisense	Up	114298201	114899145	trans
lnc-CDK12-2	ABCB5	chr7	20654830	20816658	Down	chr17	37558045	37562486	Antisense	Up	37258045	37862486	trans
lnc-CDK12-2	ACOT8	chr20	44470360	44486045	Up	chr17	37558045	37562486	Antisense	Up	37258045	37862486	trans
lnc-CDK12-2	ADAMTS6	chr5	64444563	64777747	Down	chr17	37558045	37562486	Antisense	Up	37258045	37862486	trans
lnc-CDK12-2	AIMP2	chr7	6048876	6063465	Up	chr17	37558045	37562486	Antisense	Up	37258045	37862486	trans
lnc-CDK12-2	ANK2	chr4	113739265	114304896	Down	chr17	37558045	37562486	Antisense	Up	37258045	37862486	trans
lnc-CDK12-2	ASPH	chr8	62413116	62627155	Down	chr17	37558045	37562486	Antisense	Up	37258045	37862486	trans
lnc-CDK12-2	ATRNL1	chr10	116853124	117708503	Down	chr17	37558045	37562486	Antisense	Up	37258045	37862486	trans
lnc-CDK12-2	BANF1	chr11	65769550	65771620	Up	chr17	37558045	37562486	Antisense	Up	37258045	37862486	trans
lnc-CDK12-2	BCAS2	chr1	115110178	115124260	Up	chr17	37558045	37562486	Antisense	Up	37258045	37862486	trans
lnc-CDK12-2	BLOC1S6	chr15	45879321	45908197	Up	chr17	37558045	37562486	Antisense	Up	37258045	37862486	trans
lnc-CDK12-2	BUD31	chr7	99006264	99017239	Up	chr17	37558045	37562486	Antisense	Up	37258045	37862486	trans
lnc-CDK12-2	CA4	chr17	58227297	58248260	Down	chr17	37558045	37562486	Antisense	Up	37258045	37862486	trans
lnc-CDK12-2	CACNA1B	chr9	140772241	141019076	Down	chr17	37558045	37562486	Antisense	Up	37258045	37862486	trans
lnc-CDK12-2	CACNA1F	chrX	49061523	49089833	Down	chr17	37558045	37562486	Antisense	Up	37258045	37862486	trans
lnc-CDK12-2	CCDC168	chr13	103381801	103389159	Down	chr17	37558045	37562486	Antisense	Up	37258045	37862486	trans
lnc-CDK12-2	CDK15	chr2	202655184	202760273	Down	chr17	37558045	37562486	Antisense	Up	37258045	37862486	trans
lnc-CDK12-2	CHMP4B	chr20	32399110	32442172	Up	chr17	37558045	37562486	Antisense	Up	37258045	37862486	trans
lnc-CDK12-2	CIB4	chr2	26804070	26864236	Down	chr17	37558045	37562486	Antisense	Up	37258045	37862486	trans
lnc-CDK12-2	CLUAP1	chr16	3550924	3589048	Up	chr17	37558045	37562486	Antisense	Up	37258045	37862486	trans
lnc-CDK12-2	COQ7	chr16	19078921	19091417	Up	chr17	37558045	37562486	Antisense	Up	37258045	37862486	trans
lnc-CDK12-2	COX20	chr1	244998624	245008359	Up	chr17	37558045	37562486	Antisense	Up	37258045	37862486	trans
lnc-CDK12-2	CPED1	chr7	120628731	120937498	Down	chr17	37558045	37562486	Antisense	Up	37258045	37862486	trans
lnc-CDK12-2	DGKB	chr7	14184674	15014402	Down	chr17	37558045	37562486	Antisense	Up	37258045	37862486	trans
lnc-CDK12-2	EFCAB10	chr7	105565108	105581542	Up	chr17	37558045	37562486	Antisense	Up	37258045	37862486	trans
lnc-CDK12-2	ENTPD3	chr3	40428647	40470110	Up	chr17	37558045	37562486	Antisense	Up	37258045	37862486	trans
lnc-CDK12-2	FAM69B	chr9	139607022	139618502	Up	chr17	37558045	37562486	Antisense	Up	37258045	37862486	trans
lnc-CDK12-2	FAM73B	chr9	131798900	131834361	Down	chr17	37558045	37562486	Antisense	Up	37258045	37862486	trans
lnc-CDK12-2	FLJ30403	chr19	51591783	51594380	Up	chr17	37558045	37562486	Antisense	Up	37258045	37862486	trans
lnc-CDK12-2	GPR26	chr10	125425871	125454123	Down	chr17	37558045	37562486	Antisense	Up	37258045	37862486	trans
lnc-CDK12-2	HIF1A	chr14	62162231	62214976	Up	chr17	37558045	37562486	Antisense	Up	37258045	37862486	trans
lnc-CDK12-2	HIF3A	chr19	46800303	46846690	Down	chr17	37558045	37562486	Antisense	Up	37258045	37862486	trans
lnc-CDK12-2	HMGN2P46	chr15	45803334	45878488	Up	chr17	37558045	37562486	Antisense	Up	37258045	37862486	trans
lnc-CDK12-2	HOXA10	chr7	27210210	27219880	Up	chr17	37558045	37562486	Antisense	Up	37258045	37862486	trans
lnc-CDK12-2	IAH1	chr2	9613787	9636672	Up	chr17	37558045	37562486	Antisense	Up	37258045	37862486	trans
lnc-CDK12-2	ITGB4	chr17	73717408	73753899	Down	chr17	37558045	37562486	Antisense	Up	37258045	37862486	trans
lnc-CDK12-2	KDM4B	chr19	4969125	5153606	Up	chr17	37558045	37562486	Antisense	Up	37258045	37862486	trans
lnc-CDK12-2	KIF7	chr15	90152020	90198682	Down	chr17	37558045	37562486	Antisense	Up	37258045	37862486	trans
lnc-CDK12-2	LAMTOR5	chr1	110943871	110950564	Up	chr17	37558045	37562486	Antisense	Up	37258045	37862486	trans
lnc-CDK12-2	LOC100128361	chr9	92618050	92620533	Up	chr17	37558045	37562486	Antisense	Up	37258045	37862486	trans
lnc-CDK12-2	LOC100631378	chr19	38314362	38345855	Up	chr17	37558045	37562486	Antisense	Up	37258045	37862486	trans
lnc-CDK12-2	LOC101927905	chr12	8388011	8395160	Up	chr17	37558045	37562486	Antisense	Up	37258045	37862486	trans
lnc-CDK12-2	LOC642361	chr10	81585658	81587358	Up	chr17	37558045	37562486	Antisense	Up	37258045	37862486	trans
lnc-CDK12-2	LRRC20	chr10	72058729	72142382	Down	chr17	37558045	37562486	Antisense	Up	37258045	37862486	trans
lnc-CDK12-2	MCM8	chr20	5931298	5975852	Up	chr17	37558045	37562486	Antisense	Up	37258045	37862486	trans
lnc-CDK12-2	MEA1	chr6	42979832	42981706	Up	chr17	37558045	37562486	Antisense	Up	37258045	37862486	trans
lnc-CDK12-2	MIF4GD	chr17	73262309	73267308	Up	chr17	37558045	37562486	Antisense	Up	37258045	37862486	trans
lnc-CDK12-2	MIPEPP3	chr13	21298125	21392923	Up	chr17	37558045	37562486	Antisense	Up	37258045	37862486	trans
lnc-CDK12-2	NDUFA1	chrX	119005450	119010625	Up	chr17	37558045	37562486	Antisense	Up	37258045	37862486	trans
lnc-CDK12-2	NTAN1	chr16	15131710	15149921	Up	chr17	37558045	37562486	Antisense	Up	37258045	37862486	trans
lnc-CDK12-2	OTOG	chr11	17568920	17668697	Down	chr17	37558045	37562486	Antisense	Up	37258045	37862486	trans
lnc-CDK12-2	PIK3C3	chr18	39535171	39667794	Up	chr17	37558045	37562486	Antisense	Up	37258045	37862486	trans
lnc-CDK12-2	PLB1	chr2	28680012	28866654	Down	chr17	37558045	37562486	Antisense	Up	37258045	37862486	trans
lnc-CDK12-2	PLEKHM2	chr1	16010827	16061264	Down	chr17	37558045	37562486	Antisense	Up	37258045	37862486	trans
lnc-CDK12-2	PPP2CA	chr5	133530025	133561833	Up	chr17	37558045	37562486	Antisense	Up	37258045	37862486	trans
lnc-CDK12-2	PRDM2	chr1	14026693	14151574	Up	chr17	37558045	37562486	Antisense	Up	37258045	37862486	trans
lnc-CDK12-2	PRICKLE1	chr12	42852140	42984157	Down	chr17	37558045	37562486	Antisense	Up	37258045	37862486	trans
lnc-CDK12-2	PTGER3	chr1	71318036	71513491	Down	chr17	37558045	37562486	Antisense	Up	37258045	37862486	trans
lnc-CDK12-2	PVRL1	chr11	119494120	119599794	Down	chr17	37558045	37562486	Antisense	Up	37258045	37862486	trans
lnc-CDK12-2	RAP1B	chr12	69004619	69054372	Up	chr17	37558045	37562486	Antisense	Up	37258045	37862486	trans
lnc-CDK12-2	RARRES1	chr3	158414681	158450485	Up	chr17	37558045	37562486	Antisense	Up	37258045	37862486	trans
lnc-CDK12-2	RNMTL1	chr17	685513	695749	Up	chr17	37558045	37562486	Antisense	Up	37258045	37862486	trans
lnc-CDK12-2	RPL12	chr9	130209953	130213684	Up	chr17	37558045	37562486	Antisense	Up	37258045	37862486	trans
lnc-CDK12-2	RPS2	chr16	2012053	2014861	Up	chr17	37558045	37562486	Antisense	Up	37258045	37862486	trans
lnc-CDK12-2	SDCBP2-AS1	chr20	1306049	1359378	Up	chr17	37558045	37562486	Antisense	Up	37258045	37862486	trans
lnc-CDK12-2	SERPINH1	chr11	75273101	75283828	Down	chr17	37558045	37562486	Antisense	Up	37258045	37862486	trans
lnc-CDK12-2	SLC25A5	chrX	118602363	118605282	Up	chr17	37558045	37562486	Antisense	Up	37258045	37862486	trans
lnc-CDK12-2	SLC2A4	chr17	7184986	7191576	Down	chr17	37558045	37562486	Antisense	Up	37258045	37862486	trans
lnc-CDK12-2	SNF8	chr17	47006678	47022479	Up	chr17	37558045	37562486	Antisense	Up	37258045	37862486	trans
lnc-CDK12-2	SRSF9	chr12	120899471	120907596	Up	chr17	37558045	37562486	Antisense	Up	37258045	37862486	trans
lnc-CDK12-2	TACC3	chr4	1723227	1746898	Down	chr17	37558045	37562486	Antisense	Up	37258045	37862486	trans
lnc-CDK12-2	TMEM69	chr1	46152886	46160115	Up	chr17	37558045	37562486	Antisense	Up	37258045	37862486	trans
lnc-CDK12-2	TOPORS	chr9	32540542	32552551	Up	chr17	37558045	37562486	Antisense	Up	37258045	37862486	trans
lnc-CDK12-2	TRAPPC4	chr11	118889142	118896164	Up	chr17	37558045	37562486	Antisense	Up	37258045	37862486	trans
lnc-CDK12-2	TSKU	chr11	76493295	76509198	Up	chr17	37558045	37562486	Antisense	Up	37258045	37862486	trans
lnc-CDK12-2	TXN2	chr22	36863083	36878077	Up	chr17	37558045	37562486	Antisense	Up	37258045	37862486	trans
lnc-CDK12-2	USP3-AS1	chr15	63836446	63893788	Up	chr17	37558045	37562486	Antisense	Up	37258045	37862486	trans
lnc-CDK12-2	UTY	chrY	15360259	15592553	Up	chr17	37558045	37562486	Antisense	Up	37258045	37862486	trans
lnc-CDK12-2	VAMP3	chr1	7831329	7841492	Up	chr17	37558045	37562486	Antisense	Up	37258045	37862486	trans
lnc-CDK12-2	ZNF32	chr10	44139307	44144304	Up	chr17	37558045	37562486	Antisense	Up	37258045	37862486	trans
lnc-CDK12-2	ZNF350	chr19	52467596	52490109	Up	chr17	37558045	37562486	Antisense	Up	37258045	37862486	trans
lnc-CSNK1A1-7	ACOT8	chr20	44470360	44486045	Up	chr5	148997110	149001021	Antisense	Up	148697110	149301021	trans
lnc-CSNK1A1-7	ADAMTS6	chr5	64444563	64777747	Down	chr5	148997110	149001021	Antisense	Up	148697110	149301021	trans
lnc-CSNK1A1-7	ADPRM	chr17	10600911	10614550	Up	chr5	148997110	149001021	Antisense	Up	148697110	149301021	trans
lnc-CSNK1A1-7	AFTPH	chr2	64751465	64820139	Up	chr5	148997110	149001021	Antisense	Up	148697110	149301021	trans
lnc-CSNK1A1-7	AIMP2	chr7	6048876	6063465	Up	chr5	148997110	149001021	Antisense	Up	148697110	149301021	trans
lnc-CSNK1A1-7	ANGPTL6	chr19	10203014	10213472	Up	chr5	148997110	149001021	Antisense	Up	148697110	149301021	trans
lnc-CSNK1A1-7	ASPH	chr8	62413116	62627155	Down	chr5	148997110	149001021	Antisense	Up	148697110	149301021	trans
lnc-CSNK1A1-7	ATF5	chr19	50431959	50437192	Up	chr5	148997110	149001021	Antisense	Up	148697110	149301021	trans
lnc-CSNK1A1-7	ATRNL1	chr10	116853124	117708503	Down	chr5	148997110	149001021	Antisense	Up	148697110	149301021	trans
lnc-CSNK1A1-7	BANF1	chr11	65769550	65771620	Up	chr5	148997110	149001021	Antisense	Up	148697110	149301021	trans
lnc-CSNK1A1-7	BCAS2	chr1	115110178	115124260	Up	chr5	148997110	149001021	Antisense	Up	148697110	149301021	trans
lnc-CSNK1A1-7	BID	chr22	18216906	18257536	Up	chr5	148997110	149001021	Antisense	Up	148697110	149301021	trans
lnc-CSNK1A1-7	BUD31	chr7	99006264	99017239	Up	chr5	148997110	149001021	Antisense	Up	148697110	149301021	trans
lnc-CSNK1A1-7	C15orf40	chr15	83657193	83680393	Up	chr5	148997110	149001021	Antisense	Up	148697110	149301021	trans
lnc-CSNK1A1-7	C1orf192	chr1	161334521	161337664	Up	chr5	148997110	149001021	Antisense	Up	148697110	149301021	trans
lnc-CSNK1A1-7	C3orf18	chr3	50595462	50608458	Up	chr5	148997110	149001021	Antisense	Up	148697110	149301021	trans
lnc-CSNK1A1-7	C6orf52	chr6	10671651	10695030	Up	chr5	148997110	149001021	Antisense	Up	148697110	149301021	trans
lnc-CSNK1A1-7	CA4	chr17	58227297	58248260	Down	chr5	148997110	149001021	Antisense	Up	148697110	149301021	trans
lnc-CSNK1A1-7	CABP7	chr22	30116073	30127828	Up	chr5	148997110	149001021	Antisense	Up	148697110	149301021	trans
lnc-CSNK1A1-7	CCDC23	chr1	43272723	43282954	Up	chr5	148997110	149001021	Antisense	Up	148697110	149301021	trans
lnc-CSNK1A1-7	CEBPZ	chr2	37428755	37458856	Up	chr5	148997110	149001021	Antisense	Up	148697110	149301021	trans
lnc-CSNK1A1-7	CFL1	chr11	65590493	65629497	Up	chr5	148997110	149001021	Antisense	Up	148697110	149301021	trans
lnc-CSNK1A1-7	CHMP4B	chr20	32399110	32442172	Up	chr5	148997110	149001021	Antisense	Up	148697110	149301021	trans
lnc-CSNK1A1-7	CIB4	chr2	26804070	26864236	Down	chr5	148997110	149001021	Antisense	Up	148697110	149301021	trans
lnc-CSNK1A1-7	CIPC	chr14	77564440	77583630	Up	chr5	148997110	149001021	Antisense	Up	148697110	149301021	trans
lnc-CSNK1A1-7	CORO1B	chr11	67205519	67211292	Up	chr5	148997110	149001021	Antisense	Up	148697110	149301021	trans
lnc-CSNK1A1-7	CPED1	chr7	120628731	120937498	Down	chr5	148997110	149001021	Antisense	Up	148697110	149301021	trans
lnc-CSNK1A1-7	CPSF4L	chr17	71244588	71258491	Up	chr5	148997110	149001021	Antisense	Up	148697110	149301021	trans
lnc-CSNK1A1-7	EFCAB10	chr7	105565108	105581542	Up	chr5	148997110	149001021	Antisense	Up	148697110	149301021	trans
lnc-CSNK1A1-7	EIF2A	chr3	150264465	150302029	Up	chr5	148997110	149001021	Antisense	Up	148697110	149301021	trans
lnc-CSNK1A1-7	EME1	chr17	48450581	48458844	Up	chr5	148997110	149001021	Antisense	Up	148697110	149301021	trans
lnc-CSNK1A1-7	FAM104A	chr17	71203492	71232892	Up	chr5	148997110	149001021	Antisense	Up	148697110	149301021	trans
lnc-CSNK1A1-7	FAM69B	chr9	139607022	139618502	Up	chr5	148997110	149001021	Antisense	Up	148697110	149301021	trans
lnc-CSNK1A1-7	FAM73B	chr9	131798900	131834361	Down	chr5	148997110	149001021	Antisense	Up	148697110	149301021	trans
lnc-CSNK1A1-7	FLJ30403	chr19	51591783	51594380	Up	chr5	148997110	149001021	Antisense	Up	148697110	149301021	trans
lnc-CSNK1A1-7	GPR26	chr10	125425871	125454123	Down	chr5	148997110	149001021	Antisense	Up	148697110	149301021	trans
lnc-CSNK1A1-7	GTF2IRD1P1	chr7	66274980	66309813	Up	chr5	148997110	149001021	Antisense	Up	148697110	149301021	trans
lnc-CSNK1A1-7	HMGN2P46	chr15	45803334	45878488	Up	chr5	148997110	149001021	Antisense	Up	148697110	149301021	trans
lnc-CSNK1A1-7	HNRNPA3	chr2	178077291	178088686	Up	chr5	148997110	149001021	Antisense	Up	148697110	149301021	trans
lnc-CSNK1A1-7	IAH1	chr2	9613787	9636672	Up	chr5	148997110	149001021	Antisense	Up	148697110	149301021	trans
lnc-CSNK1A1-7	KCP	chr7	128870645	128910719	Down	chr5	148997110	149001021	Antisense	Up	148697110	149301021	trans
lnc-CSNK1A1-7	KRTCAP3	chr2	27665233	27669348	Up	chr5	148997110	149001021	Antisense	Up	148697110	149301021	trans
lnc-CSNK1A1-7	LOC100128361	chr9	92618050	92620533	Up	chr5	148997110	149001021	Antisense	Up	148697110	149301021	trans
lnc-CSNK1A1-7	LOC100631378	chr19	38314362	38345855	Up	chr5	148997110	149001021	Antisense	Up	148697110	149301021	trans
lnc-CSNK1A1-7	LOC101927905	chr12	8388011	8395160	Up	chr5	148997110	149001021	Antisense	Up	148697110	149301021	trans
lnc-CSNK1A1-7	LOC101928371	chr2	88538720	88575610	Up	chr5	148997110	149001021	Antisense	Up	148697110	149301021	trans
lnc-CSNK1A1-7	LRRC20	chr10	72058729	72142382	Down	chr5	148997110	149001021	Antisense	Up	148697110	149301021	trans
lnc-CSNK1A1-7	MEA1	chr6	42979832	42981706	Up	chr5	148997110	149001021	Antisense	Up	148697110	149301021	trans
lnc-CSNK1A1-7	MED31	chr17	6546635	6554954	Up	chr5	148997110	149001021	Antisense	Up	148697110	149301021	trans
lnc-CSNK1A1-7	METTL5	chr2	170666591	170681441	Up	chr5	148997110	149001021	Antisense	Up	148697110	149301021	trans
lnc-CSNK1A1-7	MTIF3	chr13	28009776	28024739	Up	chr5	148997110	149001021	Antisense	Up	148697110	149301021	trans
lnc-CSNK1A1-7	MTOR-AS1	chr1	11203955	11209594	Up	chr5	148997110	149001021	Antisense	Up	148697110	149301021	trans
lnc-CSNK1A1-7	NANOS1	chr10	120789228	120793854	Up	chr5	148997110	149001021	Antisense	Up	148697110	149301021	trans
lnc-CSNK1A1-7	PKMYT1	chr16	3018025	3030540	Up	chr5	148997110	149001021	Antisense	Up	148697110	149301021	trans
lnc-CSNK1A1-7	PLEKHM2	chr1	16010827	16061264	Down	chr5	148997110	149001021	Antisense	Up	148697110	149301021	trans
lnc-CSNK1A1-7	PPIB	chr15	64448011	64455404	Up	chr5	148997110	149001021	Antisense	Up	148697110	149301021	trans
lnc-CSNK1A1-7	PPP2CA	chr5	133530025	133561833	Up	chr5	148997110	149001021	Antisense	Up	148697110	149301021	trans
lnc-CSNK1A1-7	PRICKLE1	chr12	42852140	42984157	Down	chr5	148997110	149001021	Antisense	Up	148697110	149301021	trans
lnc-CSNK1A1-7	PSMC3IP	chr17	40724333	40729849	Up	chr5	148997110	149001021	Antisense	Up	148697110	149301021	trans
lnc-CSNK1A1-7	PXN-AS1	chr12	120639094	120650941	Up	chr5	148997110	149001021	Antisense	Up	148697110	149301021	trans
lnc-CSNK1A1-7	PYROXD1	chr12	21590549	21623300	Up	chr5	148997110	149001021	Antisense	Up	148697110	149301021	trans
lnc-CSNK1A1-7	RAF1	chr3	12625100	12705725	Up	chr5	148997110	149001021	Antisense	Up	148697110	149301021	trans
lnc-CSNK1A1-7	RAP1B	chr12	69004619	69054372	Up	chr5	148997110	149001021	Antisense	Up	148697110	149301021	trans
lnc-CSNK1A1-7	RNF220	chr1	44870866	45117396	Up	chr5	148997110	149001021	Antisense	Up	148697110	149301021	trans
lnc-CSNK1A1-7	RNMTL1	chr17	685513	695749	Up	chr5	148997110	149001021	Antisense	Up	148697110	149301021	trans
lnc-CSNK1A1-7	SCAND1	chr20	34541539	34547394	Up	chr5	148997110	149001021	Antisense	Up	148697110	149301021	trans
lnc-CSNK1A1-7	SERPINH1	chr11	75273101	75283828	Down	chr5	148997110	149001021	Antisense	Up	148697110	149301021	trans
lnc-CSNK1A1-7	SLC25A5	chrX	118602363	118605282	Up	chr5	148997110	149001021	Antisense	Up	148697110	149301021	trans
lnc-CSNK1A1-7	SLC2A4	chr17	7184986	7191576	Down	chr5	148997110	149001021	Antisense	Up	148697110	149301021	trans
lnc-CSNK1A1-7	SRSF9	chr12	120899471	120907596	Up	chr5	148997110	149001021	Antisense	Up	148697110	149301021	trans
lnc-CSNK1A1-7	SSU72	chr1	1477053	1510249	Up	chr5	148997110	149001021	Antisense	Up	148697110	149301021	trans
lnc-CSNK1A1-7	SWSAP1	chr19	11485361	11487627	Up	chr5	148997110	149001021	Antisense	Up	148697110	149301021	trans
lnc-CSNK1A1-7	TACC3	chr4	1723227	1746898	Down	chr5	148997110	149001021	Antisense	Up	148697110	149301021	trans
lnc-CSNK1A1-7	TRAPPC4	chr11	118889142	118896164	Up	chr5	148997110	149001021	Antisense	Up	148697110	149301021	trans
lnc-CSNK1A1-7	TSKU	chr11	76493295	76509198	Up	chr5	148997110	149001021	Antisense	Up	148697110	149301021	trans
lnc-CSNK1A1-7	USP3-AS1	chr15	63836446	63893788	Up	chr5	148997110	149001021	Antisense	Up	148697110	149301021	trans
lnc-CSNK1A1-7	UTY	chrY	15360259	15592553	Up	chr5	148997110	149001021	Antisense	Up	148697110	149301021	trans
lnc-CSNK1A1-7	YPEL5	chr2	30369807	30383399	Up	chr5	148997110	149001021	Antisense	Up	148697110	149301021	trans
lnc-CSNK1A1-7	ZNF3	chr7	99661656	99680171	Up	chr5	148997110	149001021	Antisense	Up	148697110	149301021	trans
lnc-CSNK1A1-7	ZNF32	chr10	44139307	44144304	Up	chr5	148997110	149001021	Antisense	Up	148697110	149301021	trans
lnc-CSNK1A1-7	ZNHIT3	chr17	34842473	34855154	Up	chr5	148997110	149001021	Antisense	Up	148697110	149301021	trans
lnc-EEF1B2-3	ABCB5	chr7	20654830	20816658	Down	chr2	206854308	206865582	Antisense	Up	206554308	207165582	trans
lnc-EEF1B2-3	ACOT8	chr20	44470360	44486045	Up	chr2	206854308	206865582	Antisense	Up	206554308	207165582	trans
lnc-EEF1B2-3	ADAMTS6	chr5	64444563	64777747	Down	chr2	206854308	206865582	Antisense	Up	206554308	207165582	trans
lnc-EEF1B2-3	AIMP2	chr7	6048876	6063465	Up	chr2	206854308	206865582	Antisense	Up	206554308	207165582	trans
lnc-EEF1B2-3	ANK2	chr4	113739265	114304896	Down	chr2	206854308	206865582	Antisense	Up	206554308	207165582	trans
lnc-EEF1B2-3	ASPH	chr8	62413116	62627155	Down	chr2	206854308	206865582	Antisense	Up	206554308	207165582	trans
lnc-EEF1B2-3	ATRNL1	chr10	116853124	117708503	Down	chr2	206854308	206865582	Antisense	Up	206554308	207165582	trans
lnc-EEF1B2-3	BANF1	chr11	65769550	65771620	Up	chr2	206854308	206865582	Antisense	Up	206554308	207165582	trans
lnc-EEF1B2-3	BCAS2	chr1	115110178	115124260	Up	chr2	206854308	206865582	Antisense	Up	206554308	207165582	trans
lnc-EEF1B2-3	BLOC1S6	chr15	45879321	45908197	Up	chr2	206854308	206865582	Antisense	Up	206554308	207165582	trans
lnc-EEF1B2-3	BUD31	chr7	99006264	99017239	Up	chr2	206854308	206865582	Antisense	Up	206554308	207165582	trans
lnc-EEF1B2-3	CA4	chr17	58227297	58248260	Down	chr2	206854308	206865582	Antisense	Up	206554308	207165582	trans
lnc-EEF1B2-3	CACNA1B	chr9	140772241	141019076	Down	chr2	206854308	206865582	Antisense	Up	206554308	207165582	trans
lnc-EEF1B2-3	CACNA1F	chrX	49061523	49089833	Down	chr2	206854308	206865582	Antisense	Up	206554308	207165582	trans
lnc-EEF1B2-3	CCDC168	chr13	103381801	103389159	Down	chr2	206854308	206865582	Antisense	Up	206554308	207165582	trans
lnc-EEF1B2-3	CHMP4B	chr20	32399110	32442172	Up	chr2	206854308	206865582	Antisense	Up	206554308	207165582	trans
lnc-EEF1B2-3	CIB4	chr2	26804070	26864236	Down	chr2	206854308	206865582	Antisense	Up	206554308	207165582	trans
lnc-EEF1B2-3	CLUAP1	chr16	3550924	3589048	Up	chr2	206854308	206865582	Antisense	Up	206554308	207165582	trans
lnc-EEF1B2-3	COL3A1	chr2	189839046	189877472	Down	chr2	206854308	206865582	Antisense	Up	206554308	207165582	trans
lnc-EEF1B2-3	COQ7	chr16	19078921	19091417	Up	chr2	206854308	206865582	Antisense	Up	206554308	207165582	trans
lnc-EEF1B2-3	COX20	chr1	244998624	245008359	Up	chr2	206854308	206865582	Antisense	Up	206554308	207165582	trans
lnc-EEF1B2-3	CPED1	chr7	120628731	120937498	Down	chr2	206854308	206865582	Antisense	Up	206554308	207165582	trans
lnc-EEF1B2-3	DGKB	chr7	14184674	15014402	Down	chr2	206854308	206865582	Antisense	Up	206554308	207165582	trans
lnc-EEF1B2-3	EFCAB10	chr7	105565108	105581542	Up	chr2	206854308	206865582	Antisense	Up	206554308	207165582	trans
lnc-EEF1B2-3	ELP5	chr17	7154735	7163259	Up	chr2	206854308	206865582	Antisense	Up	206554308	207165582	trans
lnc-EEF1B2-3	ENOPH1	chr4	83351715	83382244	Up	chr2	206854308	206865582	Antisense	Up	206554308	207165582	trans
lnc-EEF1B2-3	ENTPD3	chr3	40428647	40470110	Up	chr2	206854308	206865582	Antisense	Up	206554308	207165582	trans
lnc-EEF1B2-3	FAM69B	chr9	139607022	139618502	Up	chr2	206854308	206865582	Antisense	Up	206554308	207165582	trans
lnc-EEF1B2-3	FAM73B	chr9	131798900	131834361	Down	chr2	206854308	206865582	Antisense	Up	206554308	207165582	trans
lnc-EEF1B2-3	FLJ30403	chr19	51591783	51594380	Up	chr2	206854308	206865582	Antisense	Up	206554308	207165582	trans
lnc-EEF1B2-3	GPR26	chr10	125425871	125454123	Down	chr2	206854308	206865582	Antisense	Up	206554308	207165582	trans
lnc-EEF1B2-3	HIF1A	chr14	62162231	62214976	Up	chr2	206854308	206865582	Antisense	Up	206554308	207165582	trans
lnc-EEF1B2-3	HIF3A	chr19	46800303	46846690	Down	chr2	206854308	206865582	Antisense	Up	206554308	207165582	trans
lnc-EEF1B2-3	HMGN2P46	chr15	45803334	45878488	Up	chr2	206854308	206865582	Antisense	Up	206554308	207165582	trans
lnc-EEF1B2-3	HOXA10	chr7	27210210	27219880	Up	chr2	206854308	206865582	Antisense	Up	206554308	207165582	trans
lnc-EEF1B2-3	IAH1	chr2	9613787	9636672	Up	chr2	206854308	206865582	Antisense	Up	206554308	207165582	trans
lnc-EEF1B2-3	ITGB4	chr17	73717408	73753899	Down	chr2	206854308	206865582	Antisense	Up	206554308	207165582	trans
lnc-EEF1B2-3	KDM4B	chr19	4969125	5153606	Up	chr2	206854308	206865582	Antisense	Up	206554308	207165582	trans
lnc-EEF1B2-3	KIF7	chr15	90152020	90198682	Down	chr2	206854308	206865582	Antisense	Up	206554308	207165582	trans
lnc-EEF1B2-3	LAMTOR5	chr1	110943871	110950564	Up	chr2	206854308	206865582	Antisense	Up	206554308	207165582	trans
lnc-EEF1B2-3	LOC100128361	chr9	92618050	92620533	Up	chr2	206854308	206865582	Antisense	Up	206554308	207165582	trans
lnc-EEF1B2-3	LOC100631378	chr19	38314362	38345855	Up	chr2	206854308	206865582	Antisense	Up	206554308	207165582	trans
lnc-EEF1B2-3	LOC101927905	chr12	8388011	8395160	Up	chr2	206854308	206865582	Antisense	Up	206554308	207165582	trans
lnc-EEF1B2-3	MAST3	chr19	18208603	18262502	Down	chr2	206854308	206865582	Antisense	Up	206554308	207165582	trans
lnc-EEF1B2-3	MCM8	chr20	5931298	5975852	Up	chr2	206854308	206865582	Antisense	Up	206554308	207165582	trans
lnc-EEF1B2-3	MEA1	chr6	42979832	42981706	Up	chr2	206854308	206865582	Antisense	Up	206554308	207165582	trans
lnc-EEF1B2-3	MIF4GD	chr17	73262309	73267308	Up	chr2	206854308	206865582	Antisense	Up	206554308	207165582	trans
lnc-EEF1B2-3	MIPEPP3	chr13	21298125	21392923	Up	chr2	206854308	206865582	Antisense	Up	206554308	207165582	trans
lnc-EEF1B2-3	NDUFA1	chrX	119005450	119010625	Up	chr2	206854308	206865582	Antisense	Up	206554308	207165582	trans
lnc-EEF1B2-3	NTAN1	chr16	15131710	15149921	Up	chr2	206854308	206865582	Antisense	Up	206554308	207165582	trans
lnc-EEF1B2-3	OTOG	chr11	17568920	17668697	Down	chr2	206854308	206865582	Antisense	Up	206554308	207165582	trans
lnc-EEF1B2-3	PABPC4	chr1	40026488	40042462	Up	chr2	206854308	206865582	Antisense	Up	206554308	207165582	trans
lnc-EEF1B2-3	PIK3C3	chr18	39535171	39667794	Up	chr2	206854308	206865582	Antisense	Up	206554308	207165582	trans
lnc-EEF1B2-3	PLB1	chr2	28680012	28866654	Down	chr2	206854308	206865582	Antisense	Up	206554308	207165582	trans
lnc-EEF1B2-3	PLEKHM2	chr1	16010827	16061264	Down	chr2	206854308	206865582	Antisense	Up	206554308	207165582	trans
lnc-EEF1B2-3	PPP2CA	chr5	133530025	133561833	Up	chr2	206854308	206865582	Antisense	Up	206554308	207165582	trans
lnc-EEF1B2-3	PRDM2	chr1	14026693	14151574	Up	chr2	206854308	206865582	Antisense	Up	206554308	207165582	trans
lnc-EEF1B2-3	PRICKLE1	chr12	42852140	42984157	Down	chr2	206854308	206865582	Antisense	Up	206554308	207165582	trans
lnc-EEF1B2-3	PTGER3	chr1	71318036	71513491	Down	chr2	206854308	206865582	Antisense	Up	206554308	207165582	trans
lnc-EEF1B2-3	RAP1B	chr12	69004619	69054372	Up	chr2	206854308	206865582	Antisense	Up	206554308	207165582	trans
lnc-EEF1B2-3	RARRES1	chr3	158414681	158450485	Up	chr2	206854308	206865582	Antisense	Up	206554308	207165582	trans
lnc-EEF1B2-3	RNMTL1	chr17	685513	695749	Up	chr2	206854308	206865582	Antisense	Up	206554308	207165582	trans
lnc-EEF1B2-3	RPL12	chr9	130209953	130213684	Up	chr2	206854308	206865582	Antisense	Up	206554308	207165582	trans
lnc-EEF1B2-3	RPS2	chr16	2012053	2014861	Up	chr2	206854308	206865582	Antisense	Up	206554308	207165582	trans
lnc-EEF1B2-3	SDCBP2-AS1	chr20	1306049	1359378	Up	chr2	206854308	206865582	Antisense	Up	206554308	207165582	trans
lnc-EEF1B2-3	SERPINH1	chr11	75273101	75283828	Down	chr2	206854308	206865582	Antisense	Up	206554308	207165582	trans
lnc-EEF1B2-3	SLC25A5	chrX	118602363	118605282	Up	chr2	206854308	206865582	Antisense	Up	206554308	207165582	trans
lnc-EEF1B2-3	SLC2A4	chr17	7184986	7191576	Down	chr2	206854308	206865582	Antisense	Up	206554308	207165582	trans
lnc-EEF1B2-3	SNF8	chr17	47006678	47022479	Up	chr2	206854308	206865582	Antisense	Up	206554308	207165582	trans
lnc-EEF1B2-3	SRSF9	chr12	120899471	120907596	Up	chr2	206854308	206865582	Antisense	Up	206554308	207165582	trans
lnc-EEF1B2-3	TMEM69	chr1	46152886	46160115	Up	chr2	206854308	206865582	Antisense	Up	206554308	207165582	trans
lnc-EEF1B2-3	TOPORS	chr9	32540542	32552551	Up	chr2	206854308	206865582	Antisense	Up	206554308	207165582	trans
lnc-EEF1B2-3	TRAPPC4	chr11	118889142	118896164	Up	chr2	206854308	206865582	Antisense	Up	206554308	207165582	trans
lnc-EEF1B2-3	TSKU	chr11	76493295	76509198	Up	chr2	206854308	206865582	Antisense	Up	206554308	207165582	trans
lnc-EEF1B2-3	TXN2	chr22	36863083	36878077	Up	chr2	206854308	206865582	Antisense	Up	206554308	207165582	trans
lnc-EEF1B2-3	USP3-AS1	chr15	63836446	63893788	Up	chr2	206854308	206865582	Antisense	Up	206554308	207165582	trans
lnc-EEF1B2-3	UTY	chrY	15360259	15592553	Up	chr2	206854308	206865582	Antisense	Up	206554308	207165582	trans
lnc-EEF1B2-3	VAMP3	chr1	7831329	7841492	Up	chr2	206854308	206865582	Antisense	Up	206554308	207165582	trans
lnc-EEF1B2-3	ZNF32	chr10	44139307	44144304	Up	chr2	206854308	206865582	Antisense	Up	206554308	207165582	trans
lnc-EEF1B2-3	ZNF350	chr19	52467596	52490109	Up	chr2	206854308	206865582	Antisense	Up	206554308	207165582	trans
lnc-FOXN1-1	ABCB5	chr7	20654830	20816658	Down	chr17	26900134	26901261	Antisense	Up	26600134	27201261	trans
lnc-FOXN1-1	ABCC3	chr17	48712138	48769613	Down	chr17	26900134	26901261	Antisense	Up	26600134	27201261	trans
lnc-FOXN1-1	ACOT8	chr20	44470360	44486045	Up	chr17	26900134	26901261	Antisense	Up	26600134	27201261	trans
lnc-FOXN1-1	ADAMTS6	chr5	64444563	64777747	Down	chr17	26900134	26901261	Antisense	Up	26600134	27201261	trans
lnc-FOXN1-1	ANK2	chr4	113739265	114304896	Down	chr17	26900134	26901261	Antisense	Up	26600134	27201261	trans
lnc-FOXN1-1	ASPH	chr8	62413116	62627155	Down	chr17	26900134	26901261	Antisense	Up	26600134	27201261	trans
lnc-FOXN1-1	ATRNL1	chr10	116853124	117708503	Down	chr17	26900134	26901261	Antisense	Up	26600134	27201261	trans
lnc-FOXN1-1	BANF1	chr11	65769550	65771620	Up	chr17	26900134	26901261	Antisense	Up	26600134	27201261	trans
lnc-FOXN1-1	BCAS2	chr1	115110178	115124260	Up	chr17	26900134	26901261	Antisense	Up	26600134	27201261	trans
lnc-FOXN1-1	BUD31	chr7	99006264	99017239	Up	chr17	26900134	26901261	Antisense	Up	26600134	27201261	trans
lnc-FOXN1-1	CACNA1B	chr9	140772241	141019076	Down	chr17	26900134	26901261	Antisense	Up	26600134	27201261	trans
lnc-FOXN1-1	CHMP4B	chr20	32399110	32442172	Up	chr17	26900134	26901261	Antisense	Up	26600134	27201261	trans
lnc-FOXN1-1	COX20	chr1	244998624	245008359	Up	chr17	26900134	26901261	Antisense	Up	26600134	27201261	trans
lnc-FOXN1-1	CPED1	chr7	120628731	120937498	Down	chr17	26900134	26901261	Antisense	Up	26600134	27201261	trans
lnc-FOXN1-1	DGKB	chr7	14184674	15014402	Down	chr17	26900134	26901261	Antisense	Up	26600134	27201261	trans
lnc-FOXN1-1	EFCAB10	chr7	105565108	105581542	Up	chr17	26900134	26901261	Antisense	Up	26600134	27201261	trans
lnc-FOXN1-1	ENTPD3	chr3	40428647	40470110	Up	chr17	26900134	26901261	Antisense	Up	26600134	27201261	trans
lnc-FOXN1-1	FAM73B	chr9	131798900	131834361	Down	chr17	26900134	26901261	Antisense	Up	26600134	27201261	trans
lnc-FOXN1-1	FLJ30403	chr19	51591783	51594380	Up	chr17	26900134	26901261	Antisense	Up	26600134	27201261	trans
lnc-FOXN1-1	FLNA	chrX	153576892	153603006	Down	chr17	26900134	26901261	Antisense	Up	26600134	27201261	trans
lnc-FOXN1-1	FLNC	chr7	128470431	128499328	Down	chr17	26900134	26901261	Antisense	Up	26600134	27201261	trans
lnc-FOXN1-1	GPR26	chr10	125425871	125454123	Down	chr17	26900134	26901261	Antisense	Up	26600134	27201261	trans
lnc-FOXN1-1	GTF3A	chr13	27998681	28009958	Up	chr17	26900134	26901261	Antisense	Up	26600134	27201261	trans
lnc-FOXN1-1	HMGN2P46	chr15	45803334	45878488	Up	chr17	26900134	26901261	Antisense	Up	26600134	27201261	trans
lnc-FOXN1-1	HOXA10	chr7	27210210	27219880	Up	chr17	26900134	26901261	Antisense	Up	26600134	27201261	trans
lnc-FOXN1-1	IAH1	chr2	9613787	9636672	Up	chr17	26900134	26901261	Antisense	Up	26600134	27201261	trans
lnc-FOXN1-1	KDM4B	chr19	4969125	5153606	Up	chr17	26900134	26901261	Antisense	Up	26600134	27201261	trans
lnc-FOXN1-1	LIPT2	chr11	74202757	74204778	Up	chr17	26900134	26901261	Antisense	Up	26600134	27201261	trans
lnc-FOXN1-1	LOC100631378	chr19	38314362	38345855	Up	chr17	26900134	26901261	Antisense	Up	26600134	27201261	trans
lnc-FOXN1-1	LOC101927905	chr12	8388011	8395160	Up	chr17	26900134	26901261	Antisense	Up	26600134	27201261	trans
lnc-FOXN1-1	MAX	chr14	65472892	65569413	Up	chr17	26900134	26901261	Antisense	Up	26600134	27201261	trans
lnc-FOXN1-1	MEA1	chr6	42979832	42981706	Up	chr17	26900134	26901261	Antisense	Up	26600134	27201261	trans
lnc-FOXN1-1	MIPEPP3	chr13	21298125	21392923	Up	chr17	26900134	26901261	Antisense	Up	26600134	27201261	trans
lnc-FOXN1-1	MSMP	chr9	35752987	35756610	Up	chr17	26900134	26901261	Antisense	Up	26600134	27201261	trans
lnc-FOXN1-1	NTAN1	chr16	15131710	15149921	Up	chr17	26900134	26901261	Antisense	Up	26600134	27201261	trans
lnc-FOXN1-1	OTOG	chr11	17568920	17668697	Down	chr17	26900134	26901261	Antisense	Up	26600134	27201261	trans
lnc-FOXN1-1	PLB1	chr2	28680012	28866654	Down	chr17	26900134	26901261	Antisense	Up	26600134	27201261	trans
lnc-FOXN1-1	PLEKHM2	chr1	16010827	16061264	Down	chr17	26900134	26901261	Antisense	Up	26600134	27201261	trans
lnc-FOXN1-1	PRICKLE1	chr12	42852140	42984157	Down	chr17	26900134	26901261	Antisense	Up	26600134	27201261	trans
lnc-FOXN1-1	PTGER3	chr1	71318036	71513491	Down	chr17	26900134	26901261	Antisense	Up	26600134	27201261	trans
lnc-FOXN1-1	PVRL1	chr11	119494120	119599794	Down	chr17	26900134	26901261	Antisense	Up	26600134	27201261	trans
lnc-FOXN1-1	RPS2	chr16	2012053	2014861	Up	chr17	26900134	26901261	Antisense	Up	26600134	27201261	trans
lnc-FOXN1-1	SLC25A5	chrX	118602363	118605282	Up	chr17	26900134	26901261	Antisense	Up	26600134	27201261	trans
lnc-FOXN1-1	SNF8	chr17	47006678	47022479	Up	chr17	26900134	26901261	Antisense	Up	26600134	27201261	trans
lnc-FOXN1-1	SRSF9	chr12	120899471	120907596	Up	chr17	26900134	26901261	Antisense	Up	26600134	27201261	trans
lnc-FOXN1-1	TGFBR3	chr1	92145902	92371892	Down	chr17	26900134	26901261	Antisense	Up	26600134	27201261	trans
lnc-FOXN1-1	TMEM138	chr11	61129473	61136981	Up	chr17	26900134	26901261	Antisense	Up	26600134	27201261	trans
lnc-FOXN1-1	TMEM69	chr1	46152886	46160115	Up	chr17	26900134	26901261	Antisense	Up	26600134	27201261	trans
lnc-FOXN1-1	TRAPPC4	chr11	118889142	118896164	Up	chr17	26900134	26901261	Antisense	Up	26600134	27201261	trans
lnc-FOXN1-1	TSKU	chr11	76493295	76509198	Up	chr17	26900134	26901261	Antisense	Up	26600134	27201261	trans
lnc-FOXN1-1	TXN2	chr22	36863083	36878077	Up	chr17	26900134	26901261	Antisense	Up	26600134	27201261	trans
lnc-FOXN1-1	USP3-AS1	chr15	63836446	63893788	Up	chr17	26900134	26901261	Antisense	Up	26600134	27201261	trans
lnc-FOXN1-1	UTY	chrY	15360259	15592553	Up	chr17	26900134	26901261	Antisense	Up	26600134	27201261	trans
lnc-FOXN1-1	ZNF32	chr10	44139307	44144304	Up	chr17	26900134	26901261	Antisense	Up	26600134	27201261	trans
lnc-FOXN1-1	ZNF350	chr19	52467596	52490109	Up	chr17	26900134	26901261	Antisense	Up	26600134	27201261	trans
lnc-FOXN1-1	ZNF707	chr8	144766622	144796068	Down	chr17	26900134	26901261	Antisense	Up	26600134	27201261	trans
lnc-GNS-3	ABCB5	chr7	20654830	20816658	Down	chr12	65089970	65090330	Intergenic	Up	64789970	65390330	trans
lnc-GNS-3	ACOT8	chr20	44470360	44486045	Up	chr12	65089970	65090330	Intergenic	Up	64789970	65390330	trans
lnc-GNS-3	ADAMTS6	chr5	64444563	64777747	Down	chr12	65089970	65090330	Intergenic	Up	64789970	65390330	trans
lnc-GNS-3	AIMP2	chr7	6048876	6063465	Up	chr12	65089970	65090330	Intergenic	Up	64789970	65390330	trans
lnc-GNS-3	ANK2	chr4	113739265	114304896	Down	chr12	65089970	65090330	Intergenic	Up	64789970	65390330	trans
lnc-GNS-3	ASPH	chr8	62413116	62627155	Down	chr12	65089970	65090330	Intergenic	Up	64789970	65390330	trans
lnc-GNS-3	ATRNL1	chr10	116853124	117708503	Down	chr12	65089970	65090330	Intergenic	Up	64789970	65390330	trans
lnc-GNS-3	BANF1	chr11	65769550	65771620	Up	chr12	65089970	65090330	Intergenic	Up	64789970	65390330	trans
lnc-GNS-3	BCAS2	chr1	115110178	115124260	Up	chr12	65089970	65090330	Intergenic	Up	64789970	65390330	trans
lnc-GNS-3	BLOC1S6	chr15	45879321	45908197	Up	chr12	65089970	65090330	Intergenic	Up	64789970	65390330	trans
lnc-GNS-3	BUD31	chr7	99006264	99017239	Up	chr12	65089970	65090330	Intergenic	Up	64789970	65390330	trans
lnc-GNS-3	CA4	chr17	58227297	58248260	Down	chr12	65089970	65090330	Intergenic	Up	64789970	65390330	trans
lnc-GNS-3	CACNA1B	chr9	140772241	141019076	Down	chr12	65089970	65090330	Intergenic	Up	64789970	65390330	trans
lnc-GNS-3	CACNA1F	chrX	49061523	49089833	Down	chr12	65089970	65090330	Intergenic	Up	64789970	65390330	trans
lnc-GNS-3	CCDC168	chr13	103381801	103389159	Down	chr12	65089970	65090330	Intergenic	Up	64789970	65390330	trans
lnc-GNS-3	CDK15	chr2	202655184	202760273	Down	chr12	65089970	65090330	Intergenic	Up	64789970	65390330	trans
lnc-GNS-3	CHMP4B	chr20	32399110	32442172	Up	chr12	65089970	65090330	Intergenic	Up	64789970	65390330	trans
lnc-GNS-3	CIB4	chr2	26804070	26864236	Down	chr12	65089970	65090330	Intergenic	Up	64789970	65390330	trans
lnc-GNS-3	CLUAP1	chr16	3550924	3589048	Up	chr12	65089970	65090330	Intergenic	Up	64789970	65390330	trans
lnc-GNS-3	COL3A1	chr2	189839046	189877472	Down	chr12	65089970	65090330	Intergenic	Up	64789970	65390330	trans
lnc-GNS-3	COQ7	chr16	19078921	19091417	Up	chr12	65089970	65090330	Intergenic	Up	64789970	65390330	trans
lnc-GNS-3	COX20	chr1	244998624	245008359	Up	chr12	65089970	65090330	Intergenic	Up	64789970	65390330	trans
lnc-GNS-3	CPED1	chr7	120628731	120937498	Down	chr12	65089970	65090330	Intergenic	Up	64789970	65390330	trans
lnc-GNS-3	DGKB	chr7	14184674	15014402	Down	chr12	65089970	65090330	Intergenic	Up	64789970	65390330	trans
lnc-GNS-3	DPH5	chr1	101455179	101491644	Up	chr12	65089970	65090330	Intergenic	Up	64789970	65390330	trans
lnc-GNS-3	EFCAB10	chr7	105565108	105581542	Up	chr12	65089970	65090330	Intergenic	Up	64789970	65390330	trans
lnc-GNS-3	ELP5	chr17	7154735	7163259	Up	chr12	65089970	65090330	Intergenic	Up	64789970	65390330	trans
lnc-GNS-3	ENTPD3	chr3	40428647	40470110	Up	chr12	65089970	65090330	Intergenic	Up	64789970	65390330	trans
lnc-GNS-3	FAM69B	chr9	139607022	139618502	Up	chr12	65089970	65090330	Intergenic	Up	64789970	65390330	trans
lnc-GNS-3	FAM73B	chr9	131798900	131834361	Down	chr12	65089970	65090330	Intergenic	Up	64789970	65390330	trans
lnc-GNS-3	FLJ30403	chr19	51591783	51594380	Up	chr12	65089970	65090330	Intergenic	Up	64789970	65390330	trans
lnc-GNS-3	FLNA	chrX	153576892	153603006	Down	chr12	65089970	65090330	Intergenic	Up	64789970	65390330	trans
lnc-GNS-3	GPR26	chr10	125425871	125454123	Down	chr12	65089970	65090330	Intergenic	Up	64789970	65390330	trans
lnc-GNS-3	HIF1A	chr14	62162231	62214976	Up	chr12	65089970	65090330	Intergenic	Up	64789970	65390330	trans
lnc-GNS-3	HIF3A	chr19	46800303	46846690	Down	chr12	65089970	65090330	Intergenic	Up	64789970	65390330	trans
lnc-GNS-3	HMGN2P46	chr15	45803334	45878488	Up	chr12	65089970	65090330	Intergenic	Up	64789970	65390330	trans
lnc-GNS-3	HOXA10	chr7	27210210	27219880	Up	chr12	65089970	65090330	Intergenic	Up	64789970	65390330	trans
lnc-GNS-3	IAH1	chr2	9613787	9636672	Up	chr12	65089970	65090330	Intergenic	Up	64789970	65390330	trans
lnc-GNS-3	ITGB4	chr17	73717408	73753899	Down	chr12	65089970	65090330	Intergenic	Up	64789970	65390330	trans
lnc-GNS-3	KDM4B	chr19	4969125	5153606	Up	chr12	65089970	65090330	Intergenic	Up	64789970	65390330	trans
lnc-GNS-3	KIF7	chr15	90152020	90198682	Down	chr12	65089970	65090330	Intergenic	Up	64789970	65390330	trans
lnc-GNS-3	LAMTOR5	chr1	110943871	110950564	Up	chr12	65089970	65090330	Intergenic	Up	64789970	65390330	trans
lnc-GNS-3	LOC100128361	chr9	92618050	92620533	Up	chr12	65089970	65090330	Intergenic	Up	64789970	65390330	trans
lnc-GNS-3	LOC100631378	chr19	38314362	38345855	Up	chr12	65089970	65090330	Intergenic	Up	64789970	65390330	trans
lnc-GNS-3	LOC101927905	chr12	8388011	8395160	Up	chr12	65089970	65090330	Intergenic	Up	64789970	65390330	trans
lnc-GNS-3	LRRC20	chr10	72058729	72142382	Down	chr12	65089970	65090330	Intergenic	Up	64789970	65390330	trans
lnc-GNS-3	MAST3	chr19	18208603	18262502	Down	chr12	65089970	65090330	Intergenic	Up	64789970	65390330	trans
lnc-GNS-3	MCM8	chr20	5931298	5975852	Up	chr12	65089970	65090330	Intergenic	Up	64789970	65390330	trans
lnc-GNS-3	MEA1	chr6	42979832	42981706	Up	chr12	65089970	65090330	Intergenic	Up	64789970	65390330	trans
lnc-GNS-3	MIF4GD	chr17	73262309	73267308	Up	chr12	65089970	65090330	Intergenic	Up	64789970	65390330	trans
lnc-GNS-3	MIPEPP3	chr13	21298125	21392923	Up	chr12	65089970	65090330	Intergenic	Up	64789970	65390330	trans
lnc-GNS-3	NDUFA1	chrX	119005450	119010625	Up	chr12	65089970	65090330	Intergenic	Up	64789970	65390330	trans
lnc-GNS-3	NTAN1	chr16	15131710	15149921	Up	chr12	65089970	65090330	Intergenic	Up	64789970	65390330	trans
lnc-GNS-3	OTOG	chr11	17568920	17668697	Down	chr12	65089970	65090330	Intergenic	Up	64789970	65390330	trans
lnc-GNS-3	PABPC4	chr1	40026488	40042462	Up	chr12	65089970	65090330	Intergenic	Up	64789970	65390330	trans
lnc-GNS-3	PIK3C3	chr18	39535171	39667794	Up	chr12	65089970	65090330	Intergenic	Up	64789970	65390330	trans
lnc-GNS-3	PLB1	chr2	28680012	28866654	Down	chr12	65089970	65090330	Intergenic	Up	64789970	65390330	trans
lnc-GNS-3	PLEKHM2	chr1	16010827	16061264	Down	chr12	65089970	65090330	Intergenic	Up	64789970	65390330	trans
lnc-GNS-3	PPP2CA	chr5	133530025	133561833	Up	chr12	65089970	65090330	Intergenic	Up	64789970	65390330	trans
lnc-GNS-3	PRDM2	chr1	14026693	14151574	Up	chr12	65089970	65090330	Intergenic	Up	64789970	65390330	trans
lnc-GNS-3	PRICKLE1	chr12	42852140	42984157	Down	chr12	65089970	65090330	Intergenic	Up	64789970	65390330	trans
lnc-GNS-3	PTGER3	chr1	71318036	71513491	Down	chr12	65089970	65090330	Intergenic	Up	64789970	65390330	trans
lnc-GNS-3	PYGM	chr11	64513861	64527769	Down	chr12	65089970	65090330	Intergenic	Up	64789970	65390330	trans
lnc-GNS-3	RAP1B	chr12	69004619	69054372	Up	chr12	65089970	65090330	Intergenic	Up	64789970	65390330	trans
lnc-GNS-3	RNMTL1	chr17	685513	695749	Up	chr12	65089970	65090330	Intergenic	Up	64789970	65390330	trans
lnc-GNS-3	RPL12	chr9	130209953	130213684	Up	chr12	65089970	65090330	Intergenic	Up	64789970	65390330	trans
lnc-GNS-3	RPS2	chr16	2012053	2014861	Up	chr12	65089970	65090330	Intergenic	Up	64789970	65390330	trans
lnc-GNS-3	SDCBP2-AS1	chr20	1306049	1359378	Up	chr12	65089970	65090330	Intergenic	Up	64789970	65390330	trans
lnc-GNS-3	SERPINH1	chr11	75273101	75283828	Down	chr12	65089970	65090330	Intergenic	Up	64789970	65390330	trans
lnc-GNS-3	SLC25A11	chr17	4840425	4843546	Up	chr12	65089970	65090330	Intergenic	Up	64789970	65390330	trans
lnc-GNS-3	SLC25A5	chrX	118602363	118605282	Up	chr12	65089970	65090330	Intergenic	Up	64789970	65390330	trans
lnc-GNS-3	SLC2A4	chr17	7184986	7191576	Down	chr12	65089970	65090330	Intergenic	Up	64789970	65390330	trans
lnc-GNS-3	SNF8	chr17	47006678	47022479	Up	chr12	65089970	65090330	Intergenic	Up	64789970	65390330	trans
lnc-GNS-3	SRSF9	chr12	120899471	120907596	Up	chr12	65089970	65090330	Intergenic	Up	64789970	65390330	trans
lnc-GNS-3	TACC3	chr4	1723227	1746898	Down	chr12	65089970	65090330	Intergenic	Up	64789970	65390330	trans
lnc-GNS-3	TGFBR3	chr1	92145902	92371892	Down	chr12	65089970	65090330	Intergenic	Up	64789970	65390330	trans
lnc-GNS-3	TMEM69	chr1	46152886	46160115	Up	chr12	65089970	65090330	Intergenic	Up	64789970	65390330	trans
lnc-GNS-3	TOPORS	chr9	32540542	32552551	Up	chr12	65089970	65090330	Intergenic	Up	64789970	65390330	trans
lnc-GNS-3	TRAPPC4	chr11	118889142	118896164	Up	chr12	65089970	65090330	Intergenic	Up	64789970	65390330	trans
lnc-GNS-3	TSKU	chr11	76493295	76509198	Up	chr12	65089970	65090330	Intergenic	Up	64789970	65390330	trans
lnc-GNS-3	TTC40	chr10	134621896	134756327	Down	chr12	65089970	65090330	Intergenic	Up	64789970	65390330	trans
lnc-GNS-3	TXN2	chr22	36863083	36878077	Up	chr12	65089970	65090330	Intergenic	Up	64789970	65390330	trans
lnc-GNS-3	USP3-AS1	chr15	63836446	63893788	Up	chr12	65089970	65090330	Intergenic	Up	64789970	65390330	trans
lnc-GNS-3	UTY	chrY	15360259	15592553	Up	chr12	65089970	65090330	Intergenic	Up	64789970	65390330	trans
lnc-GNS-3	VAMP3	chr1	7831329	7841492	Up	chr12	65089970	65090330	Intergenic	Up	64789970	65390330	trans
lnc-GNS-3	ZNF32	chr10	44139307	44144304	Up	chr12	65089970	65090330	Intergenic	Up	64789970	65390330	trans
lnc-GNS-3	ZNF350	chr19	52467596	52490109	Up	chr12	65089970	65090330	Intergenic	Up	64789970	65390330	trans
lnc-IL31RA-1	ABCB5	chr7	20654830	20816658	Down	chr5	55231970	55237555	Intron	Up	54931970	55537555	trans
lnc-IL31RA-1	ACOT8	chr20	44470360	44486045	Up	chr5	55231970	55237555	Intron	Up	54931970	55537555	trans
lnc-IL31RA-1	ADAMTS6	chr5	64444563	64777747	Down	chr5	55231970	55237555	Intron	Up	54931970	55537555	trans
lnc-IL31RA-1	AIMP2	chr7	6048876	6063465	Up	chr5	55231970	55237555	Intron	Up	54931970	55537555	trans
lnc-IL31RA-1	ANK2	chr4	113739265	114304896	Down	chr5	55231970	55237555	Intron	Up	54931970	55537555	trans
lnc-IL31RA-1	ASPH	chr8	62413116	62627155	Down	chr5	55231970	55237555	Intron	Up	54931970	55537555	trans
lnc-IL31RA-1	ATRNL1	chr10	116853124	117708503	Down	chr5	55231970	55237555	Intron	Up	54931970	55537555	trans
lnc-IL31RA-1	BANF1	chr11	65769550	65771620	Up	chr5	55231970	55237555	Intron	Up	54931970	55537555	trans
lnc-IL31RA-1	BCAS2	chr1	115110178	115124260	Up	chr5	55231970	55237555	Intron	Up	54931970	55537555	trans
lnc-IL31RA-1	BLOC1S6	chr15	45879321	45908197	Up	chr5	55231970	55237555	Intron	Up	54931970	55537555	trans
lnc-IL31RA-1	BUD31	chr7	99006264	99017239	Up	chr5	55231970	55237555	Intron	Up	54931970	55537555	trans
lnc-IL31RA-1	CA4	chr17	58227297	58248260	Down	chr5	55231970	55237555	Intron	Up	54931970	55537555	trans
lnc-IL31RA-1	CACNA1B	chr9	140772241	141019076	Down	chr5	55231970	55237555	Intron	Up	54931970	55537555	trans
lnc-IL31RA-1	CCDC168	chr13	103381801	103389159	Down	chr5	55231970	55237555	Intron	Up	54931970	55537555	trans
lnc-IL31RA-1	CDK15	chr2	202655184	202760273	Down	chr5	55231970	55237555	Intron	Up	54931970	55537555	trans
lnc-IL31RA-1	CHMP4B	chr20	32399110	32442172	Up	chr5	55231970	55237555	Intron	Up	54931970	55537555	trans
lnc-IL31RA-1	CIB4	chr2	26804070	26864236	Down	chr5	55231970	55237555	Intron	Up	54931970	55537555	trans
lnc-IL31RA-1	CLUAP1	chr16	3550924	3589048	Up	chr5	55231970	55237555	Intron	Up	54931970	55537555	trans
lnc-IL31RA-1	COX20	chr1	244998624	245008359	Up	chr5	55231970	55237555	Intron	Up	54931970	55537555	trans
lnc-IL31RA-1	CPED1	chr7	120628731	120937498	Down	chr5	55231970	55237555	Intron	Up	54931970	55537555	trans
lnc-IL31RA-1	DGKB	chr7	14184674	15014402	Down	chr5	55231970	55237555	Intron	Up	54931970	55537555	trans
lnc-IL31RA-1	DPH5	chr1	101455179	101491644	Up	chr5	55231970	55237555	Intron	Up	54931970	55537555	trans
lnc-IL31RA-1	EFCAB10	chr7	105565108	105581542	Up	chr5	55231970	55237555	Intron	Up	54931970	55537555	trans
lnc-IL31RA-1	ENTPD3	chr3	40428647	40470110	Up	chr5	55231970	55237555	Intron	Up	54931970	55537555	trans
lnc-IL31RA-1	FAM69B	chr9	139607022	139618502	Up	chr5	55231970	55237555	Intron	Up	54931970	55537555	trans
lnc-IL31RA-1	FAM73B	chr9	131798900	131834361	Down	chr5	55231970	55237555	Intron	Up	54931970	55537555	trans
lnc-IL31RA-1	FLJ30403	chr19	51591783	51594380	Up	chr5	55231970	55237555	Intron	Up	54931970	55537555	trans
lnc-IL31RA-1	FLNC	chr7	128470431	128499328	Down	chr5	55231970	55237555	Intron	Up	54931970	55537555	trans
lnc-IL31RA-1	GPR26	chr10	125425871	125454123	Down	chr5	55231970	55237555	Intron	Up	54931970	55537555	trans
lnc-IL31RA-1	HIF1A	chr14	62162231	62214976	Up	chr5	55231970	55237555	Intron	Up	54931970	55537555	trans
lnc-IL31RA-1	HMGN2P46	chr15	45803334	45878488	Up	chr5	55231970	55237555	Intron	Up	54931970	55537555	trans
lnc-IL31RA-1	HOXA10	chr7	27210210	27219880	Up	chr5	55231970	55237555	Intron	Up	54931970	55537555	trans
lnc-IL31RA-1	IAH1	chr2	9613787	9636672	Up	chr5	55231970	55237555	Intron	Up	54931970	55537555	trans
lnc-IL31RA-1	KDM4B	chr19	4969125	5153606	Up	chr5	55231970	55237555	Intron	Up	54931970	55537555	trans
lnc-IL31RA-1	KIF7	chr15	90152020	90198682	Down	chr5	55231970	55237555	Intron	Up	54931970	55537555	trans
lnc-IL31RA-1	LAMTOR5	chr1	110943871	110950564	Up	chr5	55231970	55237555	Intron	Up	54931970	55537555	trans
lnc-IL31RA-1	LOC100128361	chr9	92618050	92620533	Up	chr5	55231970	55237555	Intron	Up	54931970	55537555	trans
lnc-IL31RA-1	LOC100631378	chr19	38314362	38345855	Up	chr5	55231970	55237555	Intron	Up	54931970	55537555	trans
lnc-IL31RA-1	LOC101927905	chr12	8388011	8395160	Up	chr5	55231970	55237555	Intron	Up	54931970	55537555	trans
lnc-IL31RA-1	LOC642361	chr10	81585658	81587358	Up	chr5	55231970	55237555	Intron	Up	54931970	55537555	trans
lnc-IL31RA-1	LRRC20	chr10	72058729	72142382	Down	chr5	55231970	55237555	Intron	Up	54931970	55537555	trans
lnc-IL31RA-1	MEA1	chr6	42979832	42981706	Up	chr5	55231970	55237555	Intron	Up	54931970	55537555	trans
lnc-IL31RA-1	MIF4GD	chr17	73262309	73267308	Up	chr5	55231970	55237555	Intron	Up	54931970	55537555	trans
lnc-IL31RA-1	MIPEPP3	chr13	21298125	21392923	Up	chr5	55231970	55237555	Intron	Up	54931970	55537555	trans
lnc-IL31RA-1	NDUFA1	chrX	119005450	119010625	Up	chr5	55231970	55237555	Intron	Up	54931970	55537555	trans
lnc-IL31RA-1	NTAN1	chr16	15131710	15149921	Up	chr5	55231970	55237555	Intron	Up	54931970	55537555	trans
lnc-IL31RA-1	OTOG	chr11	17568920	17668697	Down	chr5	55231970	55237555	Intron	Up	54931970	55537555	trans
lnc-IL31RA-1	PIK3C3	chr18	39535171	39667794	Up	chr5	55231970	55237555	Intron	Up	54931970	55537555	trans
lnc-IL31RA-1	PLB1	chr2	28680012	28866654	Down	chr5	55231970	55237555	Intron	Up	54931970	55537555	trans
lnc-IL31RA-1	PLEKHM2	chr1	16010827	16061264	Down	chr5	55231970	55237555	Intron	Up	54931970	55537555	trans
lnc-IL31RA-1	PRDM2	chr1	14026693	14151574	Up	chr5	55231970	55237555	Intron	Up	54931970	55537555	trans
lnc-IL31RA-1	PRICKLE1	chr12	42852140	42984157	Down	chr5	55231970	55237555	Intron	Up	54931970	55537555	trans
lnc-IL31RA-1	PTGER3	chr1	71318036	71513491	Down	chr5	55231970	55237555	Intron	Up	54931970	55537555	trans
lnc-IL31RA-1	RAP1B	chr12	69004619	69054372	Up	chr5	55231970	55237555	Intron	Up	54931970	55537555	trans
lnc-IL31RA-1	RARRES1	chr3	158414681	158450485	Up	chr5	55231970	55237555	Intron	Up	54931970	55537555	trans
lnc-IL31RA-1	RNMTL1	chr17	685513	695749	Up	chr5	55231970	55237555	Intron	Up	54931970	55537555	trans
lnc-IL31RA-1	RPS2	chr16	2012053	2014861	Up	chr5	55231970	55237555	Intron	Up	54931970	55537555	trans
lnc-IL31RA-1	SDCBP2-AS1	chr20	1306049	1359378	Up	chr5	55231970	55237555	Intron	Up	54931970	55537555	trans
lnc-IL31RA-1	SERPINH1	chr11	75273101	75283828	Down	chr5	55231970	55237555	Intron	Up	54931970	55537555	trans
lnc-IL31RA-1	SLC25A5	chrX	118602363	118605282	Up	chr5	55231970	55237555	Intron	Up	54931970	55537555	trans
lnc-IL31RA-1	SLC2A4	chr17	7184986	7191576	Down	chr5	55231970	55237555	Intron	Up	54931970	55537555	trans
lnc-IL31RA-1	SNF8	chr17	47006678	47022479	Up	chr5	55231970	55237555	Intron	Up	54931970	55537555	trans
lnc-IL31RA-1	SRSF9	chr12	120899471	120907596	Up	chr5	55231970	55237555	Intron	Up	54931970	55537555	trans
lnc-IL31RA-1	TACC3	chr4	1723227	1746898	Down	chr5	55231970	55237555	Intron	Up	54931970	55537555	trans
lnc-IL31RA-1	TMEM69	chr1	46152886	46160115	Up	chr5	55231970	55237555	Intron	Up	54931970	55537555	trans
lnc-IL31RA-1	TRAPPC4	chr11	118889142	118896164	Up	chr5	55231970	55237555	Intron	Up	54931970	55537555	trans
lnc-IL31RA-1	TSKU	chr11	76493295	76509198	Up	chr5	55231970	55237555	Intron	Up	54931970	55537555	trans
lnc-IL31RA-1	TXN2	chr22	36863083	36878077	Up	chr5	55231970	55237555	Intron	Up	54931970	55537555	trans
lnc-IL31RA-1	USP3-AS1	chr15	63836446	63893788	Up	chr5	55231970	55237555	Intron	Up	54931970	55537555	trans
lnc-IL31RA-1	UTY	chrY	15360259	15592553	Up	chr5	55231970	55237555	Intron	Up	54931970	55537555	trans
lnc-IL31RA-1	VAMP3	chr1	7831329	7841492	Up	chr5	55231970	55237555	Intron	Up	54931970	55537555	trans
lnc-IL31RA-1	ZNF32	chr10	44139307	44144304	Up	chr5	55231970	55237555	Intron	Up	54931970	55537555	trans
lnc-IL31RA-1	ZNF350	chr19	52467596	52490109	Up	chr5	55231970	55237555	Intron	Up	54931970	55537555	trans
lnc-KB-1980E6.3.1-6	ABCB5	chr7	20654830	20816658	Down	chr8	103268619	103270049	Antisense	Up	102968619	103570049	trans
lnc-KB-1980E6.3.1-6	ACOT8	chr20	44470360	44486045	Up	chr8	103268619	103270049	Antisense	Up	102968619	103570049	trans
lnc-KB-1980E6.3.1-6	BCAS2	chr1	115110178	115124260	Up	chr8	103268619	103270049	Antisense	Up	102968619	103570049	trans
lnc-KB-1980E6.3.1-6	BCCIP	chr10	127512115	127542264	Up	chr8	103268619	103270049	Antisense	Up	102968619	103570049	trans
lnc-KB-1980E6.3.1-6	BUD31	chr7	99006264	99017239	Up	chr8	103268619	103270049	Antisense	Up	102968619	103570049	trans
lnc-KB-1980E6.3.1-6	C22orf39	chr22	19338891	19435755	Up	chr8	103268619	103270049	Antisense	Up	102968619	103570049	trans
lnc-KB-1980E6.3.1-6	CHMP4B	chr20	32399110	32442172	Up	chr8	103268619	103270049	Antisense	Up	102968619	103570049	trans
lnc-KB-1980E6.3.1-6	COL3A1	chr2	189839046	189877472	Down	chr8	103268619	103270049	Antisense	Up	102968619	103570049	trans
lnc-KB-1980E6.3.1-6	COL4A3BP	chr5	74664311	74807963	Up	chr8	103268619	103270049	Antisense	Up	102968619	103570049	trans
lnc-KB-1980E6.3.1-6	COL6A6	chr3	130279178	130396999	Down	chr8	103268619	103270049	Antisense	Up	102968619	103570049	trans
lnc-KB-1980E6.3.1-6	COX20	chr1	244998624	245008359	Up	chr8	103268619	103270049	Antisense	Up	102968619	103570049	trans
lnc-KB-1980E6.3.1-6	DGKB	chr7	14184674	15014402	Down	chr8	103268619	103270049	Antisense	Up	102968619	103570049	trans
lnc-KB-1980E6.3.1-6	EFCAB10	chr7	105565108	105581542	Up	chr8	103268619	103270049	Antisense	Up	102968619	103570049	trans
lnc-KB-1980E6.3.1-6	FKBP4	chr12	2904119	2914576	Up	chr8	103268619	103270049	Antisense	Up	102968619	103570049	trans
lnc-KB-1980E6.3.1-6	FLJ30403	chr19	51591783	51594380	Up	chr8	103268619	103270049	Antisense	Up	102968619	103570049	trans
lnc-KB-1980E6.3.1-6	GPR26	chr10	125425871	125454123	Down	chr8	103268619	103270049	Antisense	Up	102968619	103570049	trans
lnc-KB-1980E6.3.1-6	HMGN2P46	chr15	45803334	45878488	Up	chr8	103268619	103270049	Antisense	Up	102968619	103570049	trans
lnc-KB-1980E6.3.1-6	HMOX2	chr16	4524691	4560348	Up	chr8	103268619	103270049	Antisense	Up	102968619	103570049	trans
lnc-KB-1980E6.3.1-6	HOXA10	chr7	27210210	27219880	Up	chr8	103268619	103270049	Antisense	Up	102968619	103570049	trans
lnc-KB-1980E6.3.1-6	IAH1	chr2	9613787	9636672	Up	chr8	103268619	103270049	Antisense	Up	102968619	103570049	trans
lnc-KB-1980E6.3.1-6	LAMTOR5	chr1	110943871	110950564	Up	chr8	103268619	103270049	Antisense	Up	102968619	103570049	trans
lnc-KB-1980E6.3.1-6	MEA1	chr6	42979832	42981706	Up	chr8	103268619	103270049	Antisense	Up	102968619	103570049	trans
lnc-KB-1980E6.3.1-6	MIF4GD	chr17	73262309	73267308	Up	chr8	103268619	103270049	Antisense	Up	102968619	103570049	trans
lnc-KB-1980E6.3.1-6	MIPEPP3	chr13	21298125	21392923	Up	chr8	103268619	103270049	Antisense	Up	102968619	103570049	trans
lnc-KB-1980E6.3.1-6	NDUFA1	chrX	119005450	119010625	Up	chr8	103268619	103270049	Antisense	Up	102968619	103570049	trans
lnc-KB-1980E6.3.1-6	NTAN1	chr16	15131710	15149921	Up	chr8	103268619	103270049	Antisense	Up	102968619	103570049	trans
lnc-KB-1980E6.3.1-6	OTOG	chr11	17568920	17668697	Down	chr8	103268619	103270049	Antisense	Up	102968619	103570049	trans
lnc-KB-1980E6.3.1-6	PLB1	chr2	28680012	28866654	Down	chr8	103268619	103270049	Antisense	Up	102968619	103570049	trans
lnc-KB-1980E6.3.1-6	PPARD	chr6	35310335	35395968	Down	chr8	103268619	103270049	Antisense	Up	102968619	103570049	trans
lnc-KB-1980E6.3.1-6	PRDM2	chr1	14026693	14151574	Up	chr8	103268619	103270049	Antisense	Up	102968619	103570049	trans
lnc-KB-1980E6.3.1-6	PRICKLE1	chr12	42852140	42984157	Down	chr8	103268619	103270049	Antisense	Up	102968619	103570049	trans
lnc-KB-1980E6.3.1-6	RPS2	chr16	2012053	2014861	Up	chr8	103268619	103270049	Antisense	Up	102968619	103570049	trans
lnc-KB-1980E6.3.1-6	SERPINH1	chr11	75273101	75283828	Down	chr8	103268619	103270049	Antisense	Up	102968619	103570049	trans
lnc-KB-1980E6.3.1-6	SLC25A5	chrX	118602363	118605282	Up	chr8	103268619	103270049	Antisense	Up	102968619	103570049	trans
lnc-KB-1980E6.3.1-6	SLC26A5	chr7	102993177	103086624	Down	chr8	103268619	103270049	Antisense	Up	102968619	103570049	trans
lnc-KB-1980E6.3.1-6	SLC2A4	chr17	7184986	7191576	Down	chr8	103268619	103270049	Antisense	Up	102968619	103570049	trans
lnc-KB-1980E6.3.1-6	SNF8	chr17	47006678	47022479	Up	chr8	103268619	103270049	Antisense	Up	102968619	103570049	trans
lnc-KB-1980E6.3.1-6	SRSF9	chr12	120899471	120907596	Up	chr8	103268619	103270049	Antisense	Up	102968619	103570049	trans
lnc-KB-1980E6.3.1-6	TMEM69	chr1	46152886	46160115	Up	chr8	103268619	103270049	Antisense	Up	102968619	103570049	trans
lnc-KB-1980E6.3.1-6	TRAPPC4	chr11	118889142	118896164	Up	chr8	103268619	103270049	Antisense	Up	102968619	103570049	trans
lnc-KB-1980E6.3.1-6	USP3-AS1	chr15	63836446	63893788	Up	chr8	103268619	103270049	Antisense	Up	102968619	103570049	trans
lnc-KB-1980E6.3.1-6	ZNF350	chr19	52467596	52490109	Up	chr8	103268619	103270049	Antisense	Up	102968619	103570049	trans
lnc-LAT2-2	ABCB5	chr7	20654830	20816658	Down	chr7	73645995	73646353	Intron	Up	73345995	73946353	trans
lnc-LAT2-2	ACOT8	chr20	44470360	44486045	Up	chr7	73645995	73646353	Intron	Up	73345995	73946353	trans
lnc-LAT2-2	ADAMTS6	chr5	64444563	64777747	Down	chr7	73645995	73646353	Intron	Up	73345995	73946353	trans
lnc-LAT2-2	AFTPH	chr2	64751465	64820139	Up	chr7	73645995	73646353	Intron	Up	73345995	73946353	trans
lnc-LAT2-2	AIMP2	chr7	6048876	6063465	Up	chr7	73645995	73646353	Intron	Up	73345995	73946353	trans
lnc-LAT2-2	ANK2	chr4	113739265	114304896	Down	chr7	73645995	73646353	Intron	Up	73345995	73946353	trans
lnc-LAT2-2	ASPH	chr8	62413116	62627155	Down	chr7	73645995	73646353	Intron	Up	73345995	73946353	trans
lnc-LAT2-2	ATRNL1	chr10	116853124	117708503	Down	chr7	73645995	73646353	Intron	Up	73345995	73946353	trans
lnc-LAT2-2	BANF1	chr11	65769550	65771620	Up	chr7	73645995	73646353	Intron	Up	73345995	73946353	trans
lnc-LAT2-2	BCAS2	chr1	115110178	115124260	Up	chr7	73645995	73646353	Intron	Up	73345995	73946353	trans
lnc-LAT2-2	BLOC1S6	chr15	45879321	45908197	Up	chr7	73645995	73646353	Intron	Up	73345995	73946353	trans
lnc-LAT2-2	BUD31	chr7	99006264	99017239	Up	chr7	73645995	73646353	Intron	Up	73345995	73946353	trans
lnc-LAT2-2	CA4	chr17	58227297	58248260	Down	chr7	73645995	73646353	Intron	Up	73345995	73946353	trans
lnc-LAT2-2	CACNA1B	chr9	140772241	141019076	Down	chr7	73645995	73646353	Intron	Up	73345995	73946353	trans
lnc-LAT2-2	CACNA1F	chrX	49061523	49089833	Down	chr7	73645995	73646353	Intron	Up	73345995	73946353	trans
lnc-LAT2-2	CCDC168	chr13	103381801	103389159	Down	chr7	73645995	73646353	Intron	Up	73345995	73946353	trans
lnc-LAT2-2	CDK15	chr2	202655184	202760273	Down	chr7	73645995	73646353	Intron	Up	73345995	73946353	trans
lnc-LAT2-2	CHMP4B	chr20	32399110	32442172	Up	chr7	73645995	73646353	Intron	Up	73345995	73946353	trans
lnc-LAT2-2	CIB4	chr2	26804070	26864236	Down	chr7	73645995	73646353	Intron	Up	73345995	73946353	trans
lnc-LAT2-2	CLUAP1	chr16	3550924	3589048	Up	chr7	73645995	73646353	Intron	Up	73345995	73946353	trans
lnc-LAT2-2	COL16A1	chr1	32117848	32169920	Down	chr7	73645995	73646353	Intron	Up	73345995	73946353	trans
lnc-LAT2-2	COL3A1	chr2	189839046	189877472	Down	chr7	73645995	73646353	Intron	Up	73345995	73946353	trans
lnc-LAT2-2	COQ7	chr16	19078921	19091417	Up	chr7	73645995	73646353	Intron	Up	73345995	73946353	trans
lnc-LAT2-2	COX20	chr1	244998624	245008359	Up	chr7	73645995	73646353	Intron	Up	73345995	73946353	trans
lnc-LAT2-2	CPED1	chr7	120628731	120937498	Down	chr7	73645995	73646353	Intron	Up	73345995	73946353	trans
lnc-LAT2-2	DGKB	chr7	14184674	15014402	Down	chr7	73645995	73646353	Intron	Up	73345995	73946353	trans
lnc-LAT2-2	EFCAB10	chr7	105565108	105581542	Up	chr7	73645995	73646353	Intron	Up	73345995	73946353	trans
lnc-LAT2-2	ELP5	chr17	7154735	7163259	Up	chr7	73645995	73646353	Intron	Up	73345995	73946353	trans
lnc-LAT2-2	ENOPH1	chr4	83351715	83382244	Up	chr7	73645995	73646353	Intron	Up	73345995	73946353	trans
lnc-LAT2-2	ENTPD3	chr3	40428647	40470110	Up	chr7	73645995	73646353	Intron	Up	73345995	73946353	trans
lnc-LAT2-2	FAM69B	chr9	139607022	139618502	Up	chr7	73645995	73646353	Intron	Up	73345995	73946353	trans
lnc-LAT2-2	FAM73B	chr9	131798900	131834361	Down	chr7	73645995	73646353	Intron	Up	73345995	73946353	trans
lnc-LAT2-2	FLJ30403	chr19	51591783	51594380	Up	chr7	73645995	73646353	Intron	Up	73345995	73946353	trans
lnc-LAT2-2	FLNA	chrX	153576892	153603006	Down	chr7	73645995	73646353	Intron	Up	73345995	73946353	trans
lnc-LAT2-2	GPR26	chr10	125425871	125454123	Down	chr7	73645995	73646353	Intron	Up	73345995	73946353	trans
lnc-LAT2-2	HIF1A	chr14	62162231	62214976	Up	chr7	73645995	73646353	Intron	Up	73345995	73946353	trans
lnc-LAT2-2	HIF3A	chr19	46800303	46846690	Down	chr7	73645995	73646353	Intron	Up	73345995	73946353	trans
lnc-LAT2-2	HMGN2P46	chr15	45803334	45878488	Up	chr7	73645995	73646353	Intron	Up	73345995	73946353	trans
lnc-LAT2-2	HOXA10	chr7	27210210	27219880	Up	chr7	73645995	73646353	Intron	Up	73345995	73946353	trans
lnc-LAT2-2	IAH1	chr2	9613787	9636672	Up	chr7	73645995	73646353	Intron	Up	73345995	73946353	trans
lnc-LAT2-2	ITGB4	chr17	73717408	73753899	Down	chr7	73645995	73646353	Intron	Up	73345995	73946353	trans
lnc-LAT2-2	KDM4B	chr19	4969125	5153606	Up	chr7	73645995	73646353	Intron	Up	73345995	73946353	trans
lnc-LAT2-2	KIF7	chr15	90152020	90198682	Down	chr7	73645995	73646353	Intron	Up	73345995	73946353	trans
lnc-LAT2-2	LAMA1	chr18	6941743	7117813	Down	chr7	73645995	73646353	Intron	Up	73345995	73946353	trans
lnc-LAT2-2	LAMTOR5	chr1	110943871	110950564	Up	chr7	73645995	73646353	Intron	Up	73345995	73946353	trans
lnc-LAT2-2	LOC100128361	chr9	92618050	92620533	Up	chr7	73645995	73646353	Intron	Up	73345995	73946353	trans
lnc-LAT2-2	LOC100631378	chr19	38314362	38345855	Up	chr7	73645995	73646353	Intron	Up	73345995	73946353	trans
lnc-LAT2-2	LOC101927905	chr12	8388011	8395160	Up	chr7	73645995	73646353	Intron	Up	73345995	73946353	trans
lnc-LAT2-2	MAST3	chr19	18208603	18262502	Down	chr7	73645995	73646353	Intron	Up	73345995	73946353	trans
lnc-LAT2-2	MCM8	chr20	5931298	5975852	Up	chr7	73645995	73646353	Intron	Up	73345995	73946353	trans
lnc-LAT2-2	MEA1	chr6	42979832	42981706	Up	chr7	73645995	73646353	Intron	Up	73345995	73946353	trans
lnc-LAT2-2	MIF4GD	chr17	73262309	73267308	Up	chr7	73645995	73646353	Intron	Up	73345995	73946353	trans
lnc-LAT2-2	MIPEPP3	chr13	21298125	21392923	Up	chr7	73645995	73646353	Intron	Up	73345995	73946353	trans
lnc-LAT2-2	NDUFA1	chrX	119005450	119010625	Up	chr7	73645995	73646353	Intron	Up	73345995	73946353	trans
lnc-LAT2-2	NOS2	chr17	26083792	26127525	Down	chr7	73645995	73646353	Intron	Up	73345995	73946353	trans
lnc-LAT2-2	NTAN1	chr16	15131710	15149921	Up	chr7	73645995	73646353	Intron	Up	73345995	73946353	trans
lnc-LAT2-2	OTOG	chr11	17568920	17668697	Down	chr7	73645995	73646353	Intron	Up	73345995	73946353	trans
lnc-LAT2-2	OTOGL	chr12	80603233	80772870	Down	chr7	73645995	73646353	Intron	Up	73345995	73946353	trans
lnc-LAT2-2	PABPC4	chr1	40026488	40042462	Up	chr7	73645995	73646353	Intron	Up	73345995	73946353	trans
lnc-LAT2-2	PIK3C3	chr18	39535171	39667794	Up	chr7	73645995	73646353	Intron	Up	73345995	73946353	trans
lnc-LAT2-2	PLB1	chr2	28680012	28866654	Down	chr7	73645995	73646353	Intron	Up	73345995	73946353	trans
lnc-LAT2-2	PLEKHM2	chr1	16010827	16061264	Down	chr7	73645995	73646353	Intron	Up	73345995	73946353	trans
lnc-LAT2-2	PPP2CA	chr5	133530025	133561833	Up	chr7	73645995	73646353	Intron	Up	73345995	73946353	trans
lnc-LAT2-2	PRDM2	chr1	14026693	14151574	Up	chr7	73645995	73646353	Intron	Up	73345995	73946353	trans
lnc-LAT2-2	PRICKLE1	chr12	42852140	42984157	Down	chr7	73645995	73646353	Intron	Up	73345995	73946353	trans
lnc-LAT2-2	PTGER3	chr1	71318036	71513491	Down	chr7	73645995	73646353	Intron	Up	73345995	73946353	trans
lnc-LAT2-2	PYGM	chr11	64513861	64527769	Down	chr7	73645995	73646353	Intron	Up	73345995	73946353	trans
lnc-LAT2-2	RAP1B	chr12	69004619	69054372	Up	chr7	73645995	73646353	Intron	Up	73345995	73946353	trans
lnc-LAT2-2	RNMTL1	chr17	685513	695749	Up	chr7	73645995	73646353	Intron	Up	73345995	73946353	trans
lnc-LAT2-2	RPL12	chr9	130209953	130213684	Up	chr7	73645995	73646353	Intron	Up	73345995	73946353	trans
lnc-LAT2-2	RPS2	chr16	2012053	2014861	Up	chr7	73645995	73646353	Intron	Up	73345995	73946353	trans
lnc-LAT2-2	SERPINH1	chr11	75273101	75283828	Down	chr7	73645995	73646353	Intron	Up	73345995	73946353	trans
lnc-LAT2-2	SLC25A11	chr17	4840425	4843546	Up	chr7	73645995	73646353	Intron	Up	73345995	73946353	trans
lnc-LAT2-2	SLC25A5	chrX	118602363	118605282	Up	chr7	73645995	73646353	Intron	Up	73345995	73946353	trans
lnc-LAT2-2	SLC26A5	chr7	102993177	103086624	Down	chr7	73645995	73646353	Intron	Up	73345995	73946353	trans
lnc-LAT2-2	SLC2A4	chr17	7184986	7191576	Down	chr7	73645995	73646353	Intron	Up	73345995	73946353	trans
lnc-LAT2-2	SNF8	chr17	47006678	47022479	Up	chr7	73645995	73646353	Intron	Up	73345995	73946353	trans
lnc-LAT2-2	SRSF9	chr12	120899471	120907596	Up	chr7	73645995	73646353	Intron	Up	73345995	73946353	trans
lnc-LAT2-2	TGFBR3	chr1	92145902	92371892	Down	chr7	73645995	73646353	Intron	Up	73345995	73946353	trans
lnc-LAT2-2	TMEM69	chr1	46152886	46160115	Up	chr7	73645995	73646353	Intron	Up	73345995	73946353	trans
lnc-LAT2-2	TOPORS	chr9	32540542	32552551	Up	chr7	73645995	73646353	Intron	Up	73345995	73946353	trans
lnc-LAT2-2	TRAPPC4	chr11	118889142	118896164	Up	chr7	73645995	73646353	Intron	Up	73345995	73946353	trans
lnc-LAT2-2	TSKU	chr11	76493295	76509198	Up	chr7	73645995	73646353	Intron	Up	73345995	73946353	trans
lnc-LAT2-2	TTC40	chr10	134621896	134756327	Down	chr7	73645995	73646353	Intron	Up	73345995	73946353	trans
lnc-LAT2-2	TXN2	chr22	36863083	36878077	Up	chr7	73645995	73646353	Intron	Up	73345995	73946353	trans
lnc-LAT2-2	USP3-AS1	chr15	63836446	63893788	Up	chr7	73645995	73646353	Intron	Up	73345995	73946353	trans
lnc-LAT2-2	UTY	chrY	15360259	15592553	Up	chr7	73645995	73646353	Intron	Up	73345995	73946353	trans
lnc-LAT2-2	VAMP3	chr1	7831329	7841492	Up	chr7	73645995	73646353	Intron	Up	73345995	73946353	trans
lnc-LAT2-2	ZNF32	chr10	44139307	44144304	Up	chr7	73645995	73646353	Intron	Up	73345995	73946353	trans
lnc-LAT2-2	ZNF350	chr19	52467596	52490109	Up	chr7	73645995	73646353	Intron	Up	73345995	73946353	trans
lnc-LRRC38-2	ABAT	chr16	8768422	8878432	Up	chr1	14104759	14105625	Antisense	Up	13804759	14405625	trans
lnc-LRRC38-2	ACOT8	chr20	44470360	44486045	Up	chr1	14104759	14105625	Antisense	Up	13804759	14405625	trans
lnc-LRRC38-2	ADAMTS6	chr5	64444563	64777747	Down	chr1	14104759	14105625	Antisense	Up	13804759	14405625	trans
lnc-LRRC38-2	ADPRM	chr17	10600911	10614550	Up	chr1	14104759	14105625	Antisense	Up	13804759	14405625	trans
lnc-LRRC38-2	AFTPH	chr2	64751465	64820139	Up	chr1	14104759	14105625	Antisense	Up	13804759	14405625	trans
lnc-LRRC38-2	AIMP2	chr7	6048876	6063465	Up	chr1	14104759	14105625	Antisense	Up	13804759	14405625	trans
lnc-LRRC38-2	ANGPTL6	chr19	10203014	10213472	Up	chr1	14104759	14105625	Antisense	Up	13804759	14405625	trans
lnc-LRRC38-2	ANKRD37	chr4	186317175	186321782	Up	chr1	14104759	14105625	Antisense	Up	13804759	14405625	trans
lnc-LRRC38-2	ASPH	chr8	62413116	62627155	Down	chr1	14104759	14105625	Antisense	Up	13804759	14405625	trans
lnc-LRRC38-2	ATF5	chr19	50431959	50437192	Up	chr1	14104759	14105625	Antisense	Up	13804759	14405625	trans
lnc-LRRC38-2	ATRNL1	chr10	116853124	117708503	Down	chr1	14104759	14105625	Antisense	Up	13804759	14405625	trans
lnc-LRRC38-2	BID	chr22	18216906	18257536	Up	chr1	14104759	14105625	Antisense	Up	13804759	14405625	trans
lnc-LRRC38-2	C15orf40	chr15	83657193	83680393	Up	chr1	14104759	14105625	Antisense	Up	13804759	14405625	trans
lnc-LRRC38-2	C1orf192	chr1	161334521	161337664	Up	chr1	14104759	14105625	Antisense	Up	13804759	14405625	trans
lnc-LRRC38-2	C3orf18	chr3	50595462	50608458	Up	chr1	14104759	14105625	Antisense	Up	13804759	14405625	trans
lnc-LRRC38-2	C6orf52	chr6	10671651	10695030	Up	chr1	14104759	14105625	Antisense	Up	13804759	14405625	trans
lnc-LRRC38-2	CA4	chr17	58227297	58248260	Down	chr1	14104759	14105625	Antisense	Up	13804759	14405625	trans
lnc-LRRC38-2	CABP7	chr22	30116073	30127828	Up	chr1	14104759	14105625	Antisense	Up	13804759	14405625	trans
lnc-LRRC38-2	CCDC23	chr1	43272723	43282954	Up	chr1	14104759	14105625	Antisense	Up	13804759	14405625	trans
lnc-LRRC38-2	CEBPZ	chr2	37428755	37458856	Up	chr1	14104759	14105625	Antisense	Up	13804759	14405625	trans
lnc-LRRC38-2	CFL1	chr11	65590493	65629497	Up	chr1	14104759	14105625	Antisense	Up	13804759	14405625	trans
lnc-LRRC38-2	CIB4	chr2	26804070	26864236	Down	chr1	14104759	14105625	Antisense	Up	13804759	14405625	trans
lnc-LRRC38-2	CIPC	chr14	77564440	77583630	Up	chr1	14104759	14105625	Antisense	Up	13804759	14405625	trans
lnc-LRRC38-2	CORO1B	chr11	67205519	67211292	Up	chr1	14104759	14105625	Antisense	Up	13804759	14405625	trans
lnc-LRRC38-2	CPSF4L	chr17	71244588	71258491	Up	chr1	14104759	14105625	Antisense	Up	13804759	14405625	trans
lnc-LRRC38-2	EBLN3	chr9	37079893	37090398	Up	chr1	14104759	14105625	Antisense	Up	13804759	14405625	trans
lnc-LRRC38-2	EFCAB10	chr7	105565108	105581542	Up	chr1	14104759	14105625	Antisense	Up	13804759	14405625	trans
lnc-LRRC38-2	EIF2A	chr3	150264465	150302029	Up	chr1	14104759	14105625	Antisense	Up	13804759	14405625	trans
lnc-LRRC38-2	EME1	chr17	48450581	48458844	Up	chr1	14104759	14105625	Antisense	Up	13804759	14405625	trans
lnc-LRRC38-2	FAM104A	chr17	71203492	71232892	Up	chr1	14104759	14105625	Antisense	Up	13804759	14405625	trans
lnc-LRRC38-2	FAM219B	chr15	75192328	75199462	Up	chr1	14104759	14105625	Antisense	Up	13804759	14405625	trans
lnc-LRRC38-2	FAM69B	chr9	139607022	139618502	Up	chr1	14104759	14105625	Antisense	Up	13804759	14405625	trans
lnc-LRRC38-2	GGACT	chr13	101183810	101241782	Up	chr1	14104759	14105625	Antisense	Up	13804759	14405625	trans
lnc-LRRC38-2	GTF2IRD1P1	chr7	66274980	66309813	Up	chr1	14104759	14105625	Antisense	Up	13804759	14405625	trans
lnc-LRRC38-2	HNRNPA3	chr2	178077291	178088686	Up	chr1	14104759	14105625	Antisense	Up	13804759	14405625	trans
lnc-LRRC38-2	ISOC1	chr5	128430444	128449721	Up	chr1	14104759	14105625	Antisense	Up	13804759	14405625	trans
lnc-LRRC38-2	KCP	chr7	128870645	128910719	Down	chr1	14104759	14105625	Antisense	Up	13804759	14405625	trans
lnc-LRRC38-2	KRT10	chr17	38974369	38978847	Up	chr1	14104759	14105625	Antisense	Up	13804759	14405625	trans
lnc-LRRC38-2	KRTCAP3	chr2	27665233	27669348	Up	chr1	14104759	14105625	Antisense	Up	13804759	14405625	trans
lnc-LRRC38-2	LOC101928371	chr2	88538720	88575610	Up	chr1	14104759	14105625	Antisense	Up	13804759	14405625	trans
lnc-LRRC38-2	LRRC20	chr10	72058729	72142382	Down	chr1	14104759	14105625	Antisense	Up	13804759	14405625	trans
lnc-LRRC38-2	MCEE	chr2	71336814	71357369	Up	chr1	14104759	14105625	Antisense	Up	13804759	14405625	trans
lnc-LRRC38-2	MEA1	chr6	42979832	42981706	Up	chr1	14104759	14105625	Antisense	Up	13804759	14405625	trans
lnc-LRRC38-2	MED31	chr17	6546635	6554954	Up	chr1	14104759	14105625	Antisense	Up	13804759	14405625	trans
lnc-LRRC38-2	METTL5	chr2	170666591	170681441	Up	chr1	14104759	14105625	Antisense	Up	13804759	14405625	trans
lnc-LRRC38-2	MFSD4	chr1	205538013	205572046	Up	chr1	14104759	14105625	Antisense	Up	13804759	14405625	trans
lnc-LRRC38-2	MIPEPP3	chr13	21298125	21392923	Up	chr1	14104759	14105625	Antisense	Up	13804759	14405625	trans
lnc-LRRC38-2	MIPOL1	chr14	37667118	38021566	Up	chr1	14104759	14105625	Antisense	Up	13804759	14405625	trans
lnc-LRRC38-2	MTIF3	chr13	28009776	28024739	Up	chr1	14104759	14105625	Antisense	Up	13804759	14405625	trans
lnc-LRRC38-2	MTOR-AS1	chr1	11203955	11209594	Up	chr1	14104759	14105625	Antisense	Up	13804759	14405625	trans
lnc-LRRC38-2	NANOS1	chr10	120789228	120793854	Up	chr1	14104759	14105625	Antisense	Up	13804759	14405625	trans
lnc-LRRC38-2	NAPEPLD	chr7	102740223	102790007	Up	chr1	14104759	14105625	Antisense	Up	13804759	14405625	trans
lnc-LRRC38-2	PEX11A	chr15	90220995	90234014	Up	chr1	14104759	14105625	Antisense	Up	13804759	14405625	trans
lnc-LRRC38-2	PIGF	chr2	46808076	46844258	Up	chr1	14104759	14105625	Antisense	Up	13804759	14405625	trans
lnc-LRRC38-2	PKMYT1	chr16	3018025	3030540	Up	chr1	14104759	14105625	Antisense	Up	13804759	14405625	trans
lnc-LRRC38-2	POTEF	chr14	19553365	19590078	Up	chr1	14104759	14105625	Antisense	Up	13804759	14405625	trans
lnc-LRRC38-2	PPIB	chr15	64448011	64455404	Up	chr1	14104759	14105625	Antisense	Up	13804759	14405625	trans
lnc-LRRC38-2	PPP2CA	chr5	133530025	133561833	Up	chr1	14104759	14105625	Antisense	Up	13804759	14405625	trans
lnc-LRRC38-2	PRDX1	chr1	45976708	45988719	Up	chr1	14104759	14105625	Antisense	Up	13804759	14405625	trans
lnc-LRRC38-2	PSMC3IP	chr17	40724333	40729849	Up	chr1	14104759	14105625	Antisense	Up	13804759	14405625	trans
lnc-LRRC38-2	PYROXD1	chr12	21590549	21623300	Up	chr1	14104759	14105625	Antisense	Up	13804759	14405625	trans
lnc-LRRC38-2	RAB11B	chr19	8454865	8469318	Up	chr1	14104759	14105625	Antisense	Up	13804759	14405625	trans
lnc-LRRC38-2	RAB7A	chr3	128444965	128533639	Up	chr1	14104759	14105625	Antisense	Up	13804759	14405625	trans
lnc-LRRC38-2	RAF1	chr3	12625100	12705725	Up	chr1	14104759	14105625	Antisense	Up	13804759	14405625	trans
lnc-LRRC38-2	RAP1B	chr12	69004619	69054372	Up	chr1	14104759	14105625	Antisense	Up	13804759	14405625	trans
lnc-LRRC38-2	RBM39	chr20	34291531	34330234	Up	chr1	14104759	14105625	Antisense	Up	13804759	14405625	trans
lnc-LRRC38-2	RFK	chr9	79000433	79009433	Up	chr1	14104759	14105625	Antisense	Up	13804759	14405625	trans
lnc-LRRC38-2	RFPL1	chr22	29834572	29838444	Up	chr1	14104759	14105625	Antisense	Up	13804759	14405625	trans
lnc-LRRC38-2	RMDN1	chr8	87480486	87526586	Up	chr1	14104759	14105625	Antisense	Up	13804759	14405625	trans
lnc-LRRC38-2	RNF220	chr1	44870866	45117396	Up	chr1	14104759	14105625	Antisense	Up	13804759	14405625	trans
lnc-LRRC38-2	RNMTL1	chr17	685513	695749	Up	chr1	14104759	14105625	Antisense	Up	13804759	14405625	trans
lnc-LRRC38-2	SCAND1	chr20	34541539	34547394	Up	chr1	14104759	14105625	Antisense	Up	13804759	14405625	trans
lnc-LRRC38-2	SLC2A4	chr17	7184986	7191576	Down	chr1	14104759	14105625	Antisense	Up	13804759	14405625	trans
lnc-LRRC38-2	SSU72	chr1	1477053	1510249	Up	chr1	14104759	14105625	Antisense	Up	13804759	14405625	trans
lnc-LRRC38-2	SWSAP1	chr19	11485361	11487627	Up	chr1	14104759	14105625	Antisense	Up	13804759	14405625	trans
lnc-LRRC38-2	TCEA1	chr8	54879112	54935089	Up	chr1	14104759	14105625	Antisense	Up	13804759	14405625	trans
lnc-LRRC38-2	TP53INP1	chr8	95938200	95961639	Up	chr1	14104759	14105625	Antisense	Up	13804759	14405625	trans
lnc-LRRC38-2	USP3-AS1	chr15	63836446	63893788	Up	chr1	14104759	14105625	Antisense	Up	13804759	14405625	trans
lnc-LRRC38-2	VAMP3	chr1	7831329	7841492	Up	chr1	14104759	14105625	Antisense	Up	13804759	14405625	trans
lnc-LRRC38-2	YPEL5	chr2	30369807	30383399	Up	chr1	14104759	14105625	Antisense	Up	13804759	14405625	trans
lnc-LRRC38-2	ZNF224	chr19	44598492	44612479	Up	chr1	14104759	14105625	Antisense	Up	13804759	14405625	trans
lnc-LRRC38-2	ZNF3	chr7	99661656	99680171	Up	chr1	14104759	14105625	Antisense	Up	13804759	14405625	trans
lnc-LRRC38-2	ZNF350	chr19	52467596	52490109	Up	chr1	14104759	14105625	Antisense	Up	13804759	14405625	trans
lnc-LRRC38-2	ZNF550	chr19	58046625	58071231	Up	chr1	14104759	14105625	Antisense	Up	13804759	14405625	trans
lnc-LRRC38-2	ZNHIT3	chr17	34842473	34855154	Up	chr1	14104759	14105625	Antisense	Up	13804759	14405625	trans
lnc-NLRP2-2	ABAT	chr16	8768422	8878432	Up	chr19	55517560	55559454	Antisense	Up	55217560	55859454	trans
lnc-NLRP2-2	ADPRM	chr17	10600911	10614550	Up	chr19	55517560	55559454	Antisense	Up	55217560	55859454	trans
lnc-NLRP2-2	AFTPH	chr2	64751465	64820139	Up	chr19	55517560	55559454	Antisense	Up	55217560	55859454	trans
lnc-NLRP2-2	AIMP2	chr7	6048876	6063465	Up	chr19	55517560	55559454	Antisense	Up	55217560	55859454	trans
lnc-NLRP2-2	ANGPTL6	chr19	10203014	10213472	Up	chr19	55517560	55559454	Antisense	Up	55217560	55859454	trans
lnc-NLRP2-2	ANKRD37	chr4	186317175	186321782	Up	chr19	55517560	55559454	Antisense	Up	55217560	55859454	trans
lnc-NLRP2-2	AP1AR	chr4	113152893	113191203	Up	chr19	55517560	55559454	Antisense	Up	55217560	55859454	trans
lnc-NLRP2-2	ATF5	chr19	50431959	50437192	Up	chr19	55517560	55559454	Antisense	Up	55217560	55859454	trans
lnc-NLRP2-2	ATP6V1E1	chr22	18074902	18111584	Up	chr19	55517560	55559454	Antisense	Up	55217560	55859454	trans
lnc-NLRP2-2	BID	chr22	18216906	18257536	Up	chr19	55517560	55559454	Antisense	Up	55217560	55859454	trans
lnc-NLRP2-2	C15orf40	chr15	83657193	83680393	Up	chr19	55517560	55559454	Antisense	Up	55217560	55859454	trans
lnc-NLRP2-2	C17orf59	chr17	8091652	8093564	Up	chr19	55517560	55559454	Antisense	Up	55217560	55859454	trans
lnc-NLRP2-2	C1orf192	chr1	161334521	161337664	Up	chr19	55517560	55559454	Antisense	Up	55217560	55859454	trans
lnc-NLRP2-2	C3orf18	chr3	50595462	50608458	Up	chr19	55517560	55559454	Antisense	Up	55217560	55859454	trans
lnc-NLRP2-2	C6orf52	chr6	10671651	10695030	Up	chr19	55517560	55559454	Antisense	Up	55217560	55859454	trans
lnc-NLRP2-2	CABP7	chr22	30116073	30127828	Up	chr19	55517560	55559454	Antisense	Up	55217560	55859454	trans
lnc-NLRP2-2	CARM1	chr19	10982189	11033453	Up	chr19	55517560	55559454	Antisense	Up	55217560	55859454	trans
lnc-NLRP2-2	CCDC152	chr5	42756903	42802462	Up	chr19	55517560	55559454	Antisense	Up	55217560	55859454	trans
lnc-NLRP2-2	CCDC23	chr1	43272723	43282954	Up	chr19	55517560	55559454	Antisense	Up	55217560	55859454	trans
lnc-NLRP2-2	CCND1	chr11	69455855	69469242	Up	chr19	55517560	55559454	Antisense	Up	55217560	55859454	trans
lnc-NLRP2-2	CEBPZ	chr2	37428755	37458856	Up	chr19	55517560	55559454	Antisense	Up	55217560	55859454	trans
lnc-NLRP2-2	CENPT	chr16	67862060	67881714	Up	chr19	55517560	55559454	Antisense	Up	55217560	55859454	trans
lnc-NLRP2-2	CFL1	chr11	65590493	65629497	Up	chr19	55517560	55559454	Antisense	Up	55217560	55859454	trans
lnc-NLRP2-2	CIPC	chr14	77564440	77583630	Up	chr19	55517560	55559454	Antisense	Up	55217560	55859454	trans
lnc-NLRP2-2	CMBL	chr5	10275987	10308138	Up	chr19	55517560	55559454	Antisense	Up	55217560	55859454	trans
lnc-NLRP2-2	COPS8	chr2	237993955	238009109	Up	chr19	55517560	55559454	Antisense	Up	55217560	55859454	trans
lnc-NLRP2-2	CORO1B	chr11	67205519	67211292	Up	chr19	55517560	55559454	Antisense	Up	55217560	55859454	trans
lnc-NLRP2-2	CPSF4L	chr17	71244588	71258491	Up	chr19	55517560	55559454	Antisense	Up	55217560	55859454	trans
lnc-NLRP2-2	CTNNA1	chr5	137946656	138270723	Up	chr19	55517560	55559454	Antisense	Up	55217560	55859454	trans
lnc-NLRP2-2	CYB561D2	chr3	50388126	50395891	Up	chr19	55517560	55559454	Antisense	Up	55217560	55859454	trans
lnc-NLRP2-2	CYB5D1	chr17	7761064	7765600	Up	chr19	55517560	55559454	Antisense	Up	55217560	55859454	trans
lnc-NLRP2-2	CYFIP1	chr15	22892005	23006016	Up	chr19	55517560	55559454	Antisense	Up	55217560	55859454	trans
lnc-NLRP2-2	DBNL	chr7	44084239	44109055	Up	chr19	55517560	55559454	Antisense	Up	55217560	55859454	trans
lnc-NLRP2-2	DNASE1	chr16	3661729	3730144	Up	chr19	55517560	55559454	Antisense	Up	55217560	55859454	trans
lnc-NLRP2-2	DOK4	chr16	57505863	57521239	Up	chr19	55517560	55559454	Antisense	Up	55217560	55859454	trans
lnc-NLRP2-2	EBLN3	chr9	37079893	37090398	Up	chr19	55517560	55559454	Antisense	Up	55217560	55859454	trans
lnc-NLRP2-2	EIF2A	chr3	150264465	150302029	Up	chr19	55517560	55559454	Antisense	Up	55217560	55859454	trans
lnc-NLRP2-2	EIF2B3	chr1	45316450	45452282	Up	chr19	55517560	55559454	Antisense	Up	55217560	55859454	trans
lnc-NLRP2-2	EME1	chr17	48450581	48458844	Up	chr19	55517560	55559454	Antisense	Up	55217560	55859454	trans
lnc-NLRP2-2	EPOR	chr19	11488236	11495018	Up	chr19	55517560	55559454	Antisense	Up	55217560	55859454	trans
lnc-NLRP2-2	FAM104A	chr17	71203492	71232892	Up	chr19	55517560	55559454	Antisense	Up	55217560	55859454	trans
lnc-NLRP2-2	FAM219B	chr15	75192328	75199462	Up	chr19	55517560	55559454	Antisense	Up	55217560	55859454	trans
lnc-NLRP2-2	GCHFR	chr15	41056218	41059906	Up	chr19	55517560	55559454	Antisense	Up	55217560	55859454	trans
lnc-NLRP2-2	GGACT	chr13	101183810	101241782	Up	chr19	55517560	55559454	Antisense	Up	55217560	55859454	trans
lnc-NLRP2-2	GTF2IRD1P1	chr7	66274980	66309813	Up	chr19	55517560	55559454	Antisense	Up	55217560	55859454	trans
lnc-NLRP2-2	HGS	chr17	79650356	79670168	Up	chr19	55517560	55559454	Antisense	Up	55217560	55859454	trans
lnc-NLRP2-2	HNRNPA3	chr2	178077291	178088686	Up	chr19	55517560	55559454	Antisense	Up	55217560	55859454	trans
lnc-NLRP2-2	ISOC1	chr5	128430444	128449721	Up	chr19	55517560	55559454	Antisense	Up	55217560	55859454	trans
lnc-NLRP2-2	JAZF1	chr7	27870192	28220362	Up	chr19	55517560	55559454	Antisense	Up	55217560	55859454	trans
lnc-NLRP2-2	KANSL1L	chr2	210886147	211036107	Up	chr19	55517560	55559454	Antisense	Up	55217560	55859454	trans
lnc-NLRP2-2	KAT2B	chr3	20081515	20195896	Up	chr19	55517560	55559454	Antisense	Up	55217560	55859454	trans
lnc-NLRP2-2	KRTCAP3	chr2	27665233	27669348	Up	chr19	55517560	55559454	Antisense	Up	55217560	55859454	trans
lnc-NLRP2-2	LOC101928371	chr2	88538720	88575610	Up	chr19	55517560	55559454	Antisense	Up	55217560	55859454	trans
lnc-NLRP2-2	LOC440434	chr17	38195740	38257249	Up	chr19	55517560	55559454	Antisense	Up	55217560	55859454	trans
lnc-NLRP2-2	MARCKSL1	chr1	32799433	32801980	Up	chr19	55517560	55559454	Antisense	Up	55217560	55859454	trans
lnc-NLRP2-2	MCEE	chr2	71336814	71357369	Up	chr19	55517560	55559454	Antisense	Up	55217560	55859454	trans
lnc-NLRP2-2	MED31	chr17	6546635	6554954	Up	chr19	55517560	55559454	Antisense	Up	55217560	55859454	trans
lnc-NLRP2-2	MED8	chr1	43849588	43855479	Up	chr19	55517560	55559454	Antisense	Up	55217560	55859454	trans
lnc-NLRP2-2	METTL5	chr2	170666591	170681441	Up	chr19	55517560	55559454	Antisense	Up	55217560	55859454	trans
lnc-NLRP2-2	MFSD4	chr1	205538013	205572046	Up	chr19	55517560	55559454	Antisense	Up	55217560	55859454	trans
lnc-NLRP2-2	MIPOL1	chr14	37667118	38021566	Up	chr19	55517560	55559454	Antisense	Up	55217560	55859454	trans
lnc-NLRP2-2	MRPL35	chr2	86426478	86440917	Up	chr19	55517560	55559454	Antisense	Up	55217560	55859454	trans
lnc-NLRP2-2	MTIF3	chr13	28009776	28024739	Up	chr19	55517560	55559454	Antisense	Up	55217560	55859454	trans
lnc-NLRP2-2	MTOR-AS1	chr1	11203955	11209594	Up	chr19	55517560	55559454	Antisense	Up	55217560	55859454	trans
lnc-NLRP2-2	NANOS1	chr10	120789228	120793854	Up	chr19	55517560	55559454	Antisense	Up	55217560	55859454	trans
lnc-NLRP2-2	NAPEPLD	chr7	102740223	102790007	Up	chr19	55517560	55559454	Antisense	Up	55217560	55859454	trans
lnc-NLRP2-2	NUDC	chr1	27226729	27273353	Up	chr19	55517560	55559454	Antisense	Up	55217560	55859454	trans
lnc-NLRP2-2	OSBPL8	chr12	76745577	76953589	Up	chr19	55517560	55559454	Antisense	Up	55217560	55859454	trans
lnc-NLRP2-2	PAPLN	chr14	73704205	73741348	Up	chr19	55517560	55559454	Antisense	Up	55217560	55859454	trans
lnc-NLRP2-2	PCID2	chr13	113831891	113863029	Up	chr19	55517560	55559454	Antisense	Up	55217560	55859454	trans
lnc-NLRP2-2	PEX11A	chr15	90220995	90234014	Up	chr19	55517560	55559454	Antisense	Up	55217560	55859454	trans
lnc-NLRP2-2	PGK1	chrX	77320685	77384793	Up	chr19	55517560	55559454	Antisense	Up	55217560	55859454	trans
lnc-NLRP2-2	PIGB	chr15	55611158	55647846	Up	chr19	55517560	55559454	Antisense	Up	55217560	55859454	trans
lnc-NLRP2-2	PIGF	chr2	46808076	46844258	Up	chr19	55517560	55559454	Antisense	Up	55217560	55859454	trans
lnc-NLRP2-2	PKMYT1	chr16	3018025	3030540	Up	chr19	55517560	55559454	Antisense	Up	55217560	55859454	trans
lnc-NLRP2-2	PNN	chr14	39644387	39652422	Up	chr19	55517560	55559454	Antisense	Up	55217560	55859454	trans
lnc-NLRP2-2	POTEF	chr14	19553365	19590078	Up	chr19	55517560	55559454	Antisense	Up	55217560	55859454	trans
lnc-NLRP2-2	PPAPDC1B	chr8	38120648	38126761	Up	chr19	55517560	55559454	Antisense	Up	55217560	55859454	trans
lnc-NLRP2-2	PPIB	chr15	64448011	64455404	Up	chr19	55517560	55559454	Antisense	Up	55217560	55859454	trans
lnc-NLRP2-2	PPP2CA	chr5	133530025	133561833	Up	chr19	55517560	55559454	Antisense	Up	55217560	55859454	trans
lnc-NLRP2-2	PRDX1	chr1	45976708	45988719	Up	chr19	55517560	55559454	Antisense	Up	55217560	55859454	trans
lnc-NLRP2-2	PSMC3IP	chr17	40724333	40729849	Up	chr19	55517560	55559454	Antisense	Up	55217560	55859454	trans
lnc-NLRP2-2	PYROXD1	chr12	21590549	21623300	Up	chr19	55517560	55559454	Antisense	Up	55217560	55859454	trans
lnc-NLRP2-2	RAB11B	chr19	8454865	8469318	Up	chr19	55517560	55559454	Antisense	Up	55217560	55859454	trans
lnc-NLRP2-2	RAB7A	chr3	128444965	128533639	Up	chr19	55517560	55559454	Antisense	Up	55217560	55859454	trans
lnc-NLRP2-2	RAF1	chr3	12625100	12705725	Up	chr19	55517560	55559454	Antisense	Up	55217560	55859454	trans
lnc-NLRP2-2	RBM39	chr20	34291531	34330234	Up	chr19	55517560	55559454	Antisense	Up	55217560	55859454	trans
lnc-NLRP2-2	RFK	chr9	79000433	79009433	Up	chr19	55517560	55559454	Antisense	Up	55217560	55859454	trans
lnc-NLRP2-2	RFPL1	chr22	29834572	29838444	Up	chr19	55517560	55559454	Antisense	Up	55217560	55859454	trans
lnc-NLRP2-2	RFPL1S	chr22	29832818	29874164	Up	chr19	55517560	55559454	Antisense	Up	55217560	55859454	trans
lnc-NLRP2-2	RMDN1	chr8	87480486	87526586	Up	chr19	55517560	55559454	Antisense	Up	55217560	55859454	trans
lnc-NLRP2-2	RNF220	chr1	44870866	45117396	Up	chr19	55517560	55559454	Antisense	Up	55217560	55859454	trans
lnc-NLRP2-2	RNMTL1	chr17	685513	695749	Up	chr19	55517560	55559454	Antisense	Up	55217560	55859454	trans
lnc-NLRP2-2	RPS7	chr2	3622795	3628509	Up	chr19	55517560	55559454	Antisense	Up	55217560	55859454	trans
lnc-NLRP2-2	SCAND1	chr20	34541539	34547394	Up	chr19	55517560	55559454	Antisense	Up	55217560	55859454	trans
lnc-NLRP2-2	SH3BP4	chr2	235860617	235964358	Up	chr19	55517560	55559454	Antisense	Up	55217560	55859454	trans
lnc-NLRP2-2	SMARCA5	chr4	144434616	144478639	Up	chr19	55517560	55559454	Antisense	Up	55217560	55859454	trans
lnc-NLRP2-2	SRSF2	chr17	74730197	74733456	Up	chr19	55517560	55559454	Antisense	Up	55217560	55859454	trans
lnc-NLRP2-2	SSU72	chr1	1477053	1510249	Up	chr19	55517560	55559454	Antisense	Up	55217560	55859454	trans
lnc-NLRP2-2	SWSAP1	chr19	11485361	11487627	Up	chr19	55517560	55559454	Antisense	Up	55217560	55859454	trans
lnc-NLRP2-2	TBC1D9	chr4	141541919	141677274	Up	chr19	55517560	55559454	Antisense	Up	55217560	55859454	trans
lnc-NLRP2-2	TCEA1	chr8	54879112	54935089	Up	chr19	55517560	55559454	Antisense	Up	55217560	55859454	trans
lnc-NLRP2-2	TP53INP1	chr8	95938200	95961639	Up	chr19	55517560	55559454	Antisense	Up	55217560	55859454	trans
lnc-NLRP2-2	ZC3H13	chr13	46528600	46626894	Up	chr19	55517560	55559454	Antisense	Up	55217560	55859454	trans
lnc-NLRP2-2	ZNF224	chr19	44598492	44612479	Up	chr19	55517560	55559454	Antisense	Up	55217560	55859454	trans
lnc-NLRP2-2	ZNF271	chr18	32870246	32890730	Up	chr19	55517560	55559454	Antisense	Up	55217560	55859454	trans
lnc-NLRP2-2	ZNF550	chr19	58046625	58071231	Up	chr19	55517560	55559454	Antisense	Up	55217560	55859454	trans
lnc-NLRP2-2	ZNHIT3	chr17	34842473	34855154	Up	chr19	55517560	55559454	Antisense	Up	55217560	55859454	trans
lnc-PHLDB1-1	ABCB5	chr7	20654830	20816658	Down	chr11	118575315	118620973	Antisense	Up	118275315	118920973	trans
lnc-PHLDB1-1	ACOT8	chr20	44470360	44486045	Up	chr11	118575315	118620973	Antisense	Up	118275315	118920973	trans
lnc-PHLDB1-1	ADAMTS6	chr5	64444563	64777747	Down	chr11	118575315	118620973	Antisense	Up	118275315	118920973	trans
lnc-PHLDB1-1	AIMP2	chr7	6048876	6063465	Up	chr11	118575315	118620973	Antisense	Up	118275315	118920973	trans
lnc-PHLDB1-1	ANK2	chr4	113739265	114304896	Down	chr11	118575315	118620973	Antisense	Up	118275315	118920973	trans
lnc-PHLDB1-1	ASPH	chr8	62413116	62627155	Down	chr11	118575315	118620973	Antisense	Up	118275315	118920973	trans
lnc-PHLDB1-1	ATRNL1	chr10	116853124	117708503	Down	chr11	118575315	118620973	Antisense	Up	118275315	118920973	trans
lnc-PHLDB1-1	BANF1	chr11	65769550	65771620	Up	chr11	118575315	118620973	Antisense	Up	118275315	118920973	trans
lnc-PHLDB1-1	BCAS2	chr1	115110178	115124260	Up	chr11	118575315	118620973	Antisense	Up	118275315	118920973	trans
lnc-PHLDB1-1	BLOC1S6	chr15	45879321	45908197	Up	chr11	118575315	118620973	Antisense	Up	118275315	118920973	trans
lnc-PHLDB1-1	BUD31	chr7	99006264	99017239	Up	chr11	118575315	118620973	Antisense	Up	118275315	118920973	trans
lnc-PHLDB1-1	CA4	chr17	58227297	58248260	Down	chr11	118575315	118620973	Antisense	Up	118275315	118920973	trans
lnc-PHLDB1-1	CACNA1B	chr9	140772241	141019076	Down	chr11	118575315	118620973	Antisense	Up	118275315	118920973	trans
lnc-PHLDB1-1	CCDC168	chr13	103381801	103389159	Down	chr11	118575315	118620973	Antisense	Up	118275315	118920973	trans
lnc-PHLDB1-1	CDK15	chr2	202655184	202760273	Down	chr11	118575315	118620973	Antisense	Up	118275315	118920973	trans
lnc-PHLDB1-1	CHMP4B	chr20	32399110	32442172	Up	chr11	118575315	118620973	Antisense	Up	118275315	118920973	trans
lnc-PHLDB1-1	CIB4	chr2	26804070	26864236	Down	chr11	118575315	118620973	Antisense	Up	118275315	118920973	trans
lnc-PHLDB1-1	CLUAP1	chr16	3550924	3589048	Up	chr11	118575315	118620973	Antisense	Up	118275315	118920973	trans
lnc-PHLDB1-1	COQ7	chr16	19078921	19091417	Up	chr11	118575315	118620973	Antisense	Up	118275315	118920973	trans
lnc-PHLDB1-1	COX20	chr1	244998624	245008359	Up	chr11	118575315	118620973	Antisense	Up	118275315	118920973	trans
lnc-PHLDB1-1	CPED1	chr7	120628731	120937498	Down	chr11	118575315	118620973	Antisense	Up	118275315	118920973	trans
lnc-PHLDB1-1	DGKB	chr7	14184674	15014402	Down	chr11	118575315	118620973	Antisense	Up	118275315	118920973	trans
lnc-PHLDB1-1	DPH5	chr1	101455179	101491644	Up	chr11	118575315	118620973	Antisense	Up	118275315	118920973	trans
lnc-PHLDB1-1	EFCAB10	chr7	105565108	105581542	Up	chr11	118575315	118620973	Antisense	Up	118275315	118920973	trans
lnc-PHLDB1-1	ELP5	chr17	7154735	7163259	Up	chr11	118575315	118620973	Antisense	Up	118275315	118920973	trans
lnc-PHLDB1-1	ENTPD3	chr3	40428647	40470110	Up	chr11	118575315	118620973	Antisense	Up	118275315	118920973	trans
lnc-PHLDB1-1	FAM69B	chr9	139607022	139618502	Up	chr11	118575315	118620973	Antisense	Up	118275315	118920973	trans
lnc-PHLDB1-1	FAM73B	chr9	131798900	131834361	Down	chr11	118575315	118620973	Antisense	Up	118275315	118920973	trans
lnc-PHLDB1-1	FLJ30403	chr19	51591783	51594380	Up	chr11	118575315	118620973	Antisense	Up	118275315	118920973	trans
lnc-PHLDB1-1	FLNA	chrX	153576892	153603006	Down	chr11	118575315	118620973	Antisense	Up	118275315	118920973	trans
lnc-PHLDB1-1	GPR26	chr10	125425871	125454123	Down	chr11	118575315	118620973	Antisense	Up	118275315	118920973	trans
lnc-PHLDB1-1	HIF1A	chr14	62162231	62214976	Up	chr11	118575315	118620973	Antisense	Up	118275315	118920973	trans
lnc-PHLDB1-1	HMGN2P46	chr15	45803334	45878488	Up	chr11	118575315	118620973	Antisense	Up	118275315	118920973	trans
lnc-PHLDB1-1	HOXA10	chr7	27210210	27219880	Up	chr11	118575315	118620973	Antisense	Up	118275315	118920973	trans
lnc-PHLDB1-1	IAH1	chr2	9613787	9636672	Up	chr11	118575315	118620973	Antisense	Up	118275315	118920973	trans
lnc-PHLDB1-1	ITGB4	chr17	73717408	73753899	Down	chr11	118575315	118620973	Antisense	Up	118275315	118920973	trans
lnc-PHLDB1-1	KDM4B	chr19	4969125	5153606	Up	chr11	118575315	118620973	Antisense	Up	118275315	118920973	trans
lnc-PHLDB1-1	KIF7	chr15	90152020	90198682	Down	chr11	118575315	118620973	Antisense	Up	118275315	118920973	trans
lnc-PHLDB1-1	LAMTOR5	chr1	110943871	110950564	Up	chr11	118575315	118620973	Antisense	Up	118275315	118920973	trans
lnc-PHLDB1-1	LOC100128361	chr9	92618050	92620533	Up	chr11	118575315	118620973	Antisense	Up	118275315	118920973	trans
lnc-PHLDB1-1	LOC100631378	chr19	38314362	38345855	Up	chr11	118575315	118620973	Antisense	Up	118275315	118920973	trans
lnc-PHLDB1-1	LOC101927905	chr12	8388011	8395160	Up	chr11	118575315	118620973	Antisense	Up	118275315	118920973	trans
lnc-PHLDB1-1	LRRC20	chr10	72058729	72142382	Down	chr11	118575315	118620973	Antisense	Up	118275315	118920973	trans
lnc-PHLDB1-1	MCM8	chr20	5931298	5975852	Up	chr11	118575315	118620973	Antisense	Up	118275315	118920973	trans
lnc-PHLDB1-1	MEA1	chr6	42979832	42981706	Up	chr11	118575315	118620973	Antisense	Up	118275315	118920973	trans
lnc-PHLDB1-1	MIF4GD	chr17	73262309	73267308	Up	chr11	118575315	118620973	Antisense	Up	118275315	118920973	trans
lnc-PHLDB1-1	MIPEPP3	chr13	21298125	21392923	Up	chr11	118575315	118620973	Antisense	Up	118275315	118920973	trans
lnc-PHLDB1-1	NDUFA1	chrX	119005450	119010625	Up	chr11	118575315	118620973	Antisense	Up	118275315	118920973	trans
lnc-PHLDB1-1	NTAN1	chr16	15131710	15149921	Up	chr11	118575315	118620973	Antisense	Up	118275315	118920973	trans
lnc-PHLDB1-1	OTOG	chr11	17568920	17668697	Down	chr11	118575315	118620973	Antisense	Up	118275315	118920973	trans
lnc-PHLDB1-1	PABPC4	chr1	40026488	40042462	Up	chr11	118575315	118620973	Antisense	Up	118275315	118920973	trans
lnc-PHLDB1-1	PIK3C3	chr18	39535171	39667794	Up	chr11	118575315	118620973	Antisense	Up	118275315	118920973	trans
lnc-PHLDB1-1	PLB1	chr2	28680012	28866654	Down	chr11	118575315	118620973	Antisense	Up	118275315	118920973	trans
lnc-PHLDB1-1	PLEKHM2	chr1	16010827	16061264	Down	chr11	118575315	118620973	Antisense	Up	118275315	118920973	trans
lnc-PHLDB1-1	PRDM2	chr1	14026693	14151574	Up	chr11	118575315	118620973	Antisense	Up	118275315	118920973	trans
lnc-PHLDB1-1	PRICKLE1	chr12	42852140	42984157	Down	chr11	118575315	118620973	Antisense	Up	118275315	118920973	trans
lnc-PHLDB1-1	PTGER3	chr1	71318036	71513491	Down	chr11	118575315	118620973	Antisense	Up	118275315	118920973	trans
lnc-PHLDB1-1	RAP1B	chr12	69004619	69054372	Up	chr11	118575315	118620973	Antisense	Up	118275315	118920973	trans
lnc-PHLDB1-1	RARRES1	chr3	158414681	158450485	Up	chr11	118575315	118620973	Antisense	Up	118275315	118920973	trans
lnc-PHLDB1-1	RNMTL1	chr17	685513	695749	Up	chr11	118575315	118620973	Antisense	Up	118275315	118920973	trans
lnc-PHLDB1-1	RPL12	chr9	130209953	130213684	Up	chr11	118575315	118620973	Antisense	Up	118275315	118920973	trans
lnc-PHLDB1-1	RPS2	chr16	2012053	2014861	Up	chr11	118575315	118620973	Antisense	Up	118275315	118920973	trans
lnc-PHLDB1-1	SDCBP2-AS1	chr20	1306049	1359378	Up	chr11	118575315	118620973	Antisense	Up	118275315	118920973	trans
lnc-PHLDB1-1	SERPINH1	chr11	75273101	75283828	Down	chr11	118575315	118620973	Antisense	Up	118275315	118920973	trans
lnc-PHLDB1-1	SLC25A11	chr17	4840425	4843546	Up	chr11	118575315	118620973	Antisense	Up	118275315	118920973	trans
lnc-PHLDB1-1	SLC25A5	chrX	118602363	118605282	Up	chr11	118575315	118620973	Antisense	Up	118275315	118920973	trans
lnc-PHLDB1-1	SLC2A4	chr17	7184986	7191576	Down	chr11	118575315	118620973	Antisense	Up	118275315	118920973	trans
lnc-PHLDB1-1	SNF8	chr17	47006678	47022479	Up	chr11	118575315	118620973	Antisense	Up	118275315	118920973	trans
lnc-PHLDB1-1	SRSF9	chr12	120899471	120907596	Up	chr11	118575315	118620973	Antisense	Up	118275315	118920973	trans
lnc-PHLDB1-1	TACC3	chr4	1723227	1746898	Down	chr11	118575315	118620973	Antisense	Up	118275315	118920973	trans
lnc-PHLDB1-1	TMEM69	chr1	46152886	46160115	Up	chr11	118575315	118620973	Antisense	Up	118275315	118920973	trans
lnc-PHLDB1-1	TOPORS	chr9	32540542	32552551	Up	chr11	118575315	118620973	Antisense	Up	118275315	118920973	trans
lnc-PHLDB1-1	TRAPPC4	chr11	118889142	118896164	Up	chr11	118575315	118620973	Antisense	Up	118275315	118920973	cis
lnc-PHLDB1-1	TSKU	chr11	76493295	76509198	Up	chr11	118575315	118620973	Antisense	Up	118275315	118920973	trans
lnc-PHLDB1-1	TXN2	chr22	36863083	36878077	Up	chr11	118575315	118620973	Antisense	Up	118275315	118920973	trans
lnc-PHLDB1-1	USP3-AS1	chr15	63836446	63893788	Up	chr11	118575315	118620973	Antisense	Up	118275315	118920973	trans
lnc-PHLDB1-1	UTY	chrY	15360259	15592553	Up	chr11	118575315	118620973	Antisense	Up	118275315	118920973	trans
lnc-PHLDB1-1	VAMP3	chr1	7831329	7841492	Up	chr11	118575315	118620973	Antisense	Up	118275315	118920973	trans
lnc-PHLDB1-1	ZNF32	chr10	44139307	44144304	Up	chr11	118575315	118620973	Antisense	Up	118275315	118920973	trans
lnc-PHLDB1-1	ZNF350	chr19	52467596	52490109	Up	chr11	118575315	118620973	Antisense	Up	118275315	118920973	trans
lnc-RAPH1-6	ABCB5	chr7	20654830	20816658	Down	chr2	204102133	204104694	Antisense	Up	203802133	204404694	trans
lnc-RAPH1-6	ACOT8	chr20	44470360	44486045	Up	chr2	204102133	204104694	Antisense	Up	203802133	204404694	trans
lnc-RAPH1-6	ADAMTS6	chr5	64444563	64777747	Down	chr2	204102133	204104694	Antisense	Up	203802133	204404694	trans
lnc-RAPH1-6	AIMP2	chr7	6048876	6063465	Up	chr2	204102133	204104694	Antisense	Up	203802133	204404694	trans
lnc-RAPH1-6	ANK2	chr4	113739265	114304896	Down	chr2	204102133	204104694	Antisense	Up	203802133	204404694	trans
lnc-RAPH1-6	ASPH	chr8	62413116	62627155	Down	chr2	204102133	204104694	Antisense	Up	203802133	204404694	trans
lnc-RAPH1-6	ATRNL1	chr10	116853124	117708503	Down	chr2	204102133	204104694	Antisense	Up	203802133	204404694	trans
lnc-RAPH1-6	BANF1	chr11	65769550	65771620	Up	chr2	204102133	204104694	Antisense	Up	203802133	204404694	trans
lnc-RAPH1-6	BCAS2	chr1	115110178	115124260	Up	chr2	204102133	204104694	Antisense	Up	203802133	204404694	trans
lnc-RAPH1-6	BLOC1S6	chr15	45879321	45908197	Up	chr2	204102133	204104694	Antisense	Up	203802133	204404694	trans
lnc-RAPH1-6	BUD31	chr7	99006264	99017239	Up	chr2	204102133	204104694	Antisense	Up	203802133	204404694	trans
lnc-RAPH1-6	CA4	chr17	58227297	58248260	Down	chr2	204102133	204104694	Antisense	Up	203802133	204404694	trans
lnc-RAPH1-6	CACNA1B	chr9	140772241	141019076	Down	chr2	204102133	204104694	Antisense	Up	203802133	204404694	trans
lnc-RAPH1-6	CCDC168	chr13	103381801	103389159	Down	chr2	204102133	204104694	Antisense	Up	203802133	204404694	trans
lnc-RAPH1-6	CDK15	chr2	202655184	202760273	Down	chr2	204102133	204104694	Antisense	Up	203802133	204404694	trans
lnc-RAPH1-6	CHMP4B	chr20	32399110	32442172	Up	chr2	204102133	204104694	Antisense	Up	203802133	204404694	trans
lnc-RAPH1-6	CIB4	chr2	26804070	26864236	Down	chr2	204102133	204104694	Antisense	Up	203802133	204404694	trans
lnc-RAPH1-6	CLUAP1	chr16	3550924	3589048	Up	chr2	204102133	204104694	Antisense	Up	203802133	204404694	trans
lnc-RAPH1-6	COX20	chr1	244998624	245008359	Up	chr2	204102133	204104694	Antisense	Up	203802133	204404694	trans
lnc-RAPH1-6	CPED1	chr7	120628731	120937498	Down	chr2	204102133	204104694	Antisense	Up	203802133	204404694	trans
lnc-RAPH1-6	DGKB	chr7	14184674	15014402	Down	chr2	204102133	204104694	Antisense	Up	203802133	204404694	trans
lnc-RAPH1-6	DPH5	chr1	101455179	101491644	Up	chr2	204102133	204104694	Antisense	Up	203802133	204404694	trans
lnc-RAPH1-6	EFCAB10	chr7	105565108	105581542	Up	chr2	204102133	204104694	Antisense	Up	203802133	204404694	trans
lnc-RAPH1-6	ENTPD3	chr3	40428647	40470110	Up	chr2	204102133	204104694	Antisense	Up	203802133	204404694	trans
lnc-RAPH1-6	FAM69B	chr9	139607022	139618502	Up	chr2	204102133	204104694	Antisense	Up	203802133	204404694	trans
lnc-RAPH1-6	FAM73B	chr9	131798900	131834361	Down	chr2	204102133	204104694	Antisense	Up	203802133	204404694	trans
lnc-RAPH1-6	FLJ30403	chr19	51591783	51594380	Up	chr2	204102133	204104694	Antisense	Up	203802133	204404694	trans
lnc-RAPH1-6	FLNC	chr7	128470431	128499328	Down	chr2	204102133	204104694	Antisense	Up	203802133	204404694	trans
lnc-RAPH1-6	GPR26	chr10	125425871	125454123	Down	chr2	204102133	204104694	Antisense	Up	203802133	204404694	trans
lnc-RAPH1-6	HIF1A	chr14	62162231	62214976	Up	chr2	204102133	204104694	Antisense	Up	203802133	204404694	trans
lnc-RAPH1-6	HMGN2P46	chr15	45803334	45878488	Up	chr2	204102133	204104694	Antisense	Up	203802133	204404694	trans
lnc-RAPH1-6	HOXA10	chr7	27210210	27219880	Up	chr2	204102133	204104694	Antisense	Up	203802133	204404694	trans
lnc-RAPH1-6	IAH1	chr2	9613787	9636672	Up	chr2	204102133	204104694	Antisense	Up	203802133	204404694	trans
lnc-RAPH1-6	KDM4B	chr19	4969125	5153606	Up	chr2	204102133	204104694	Antisense	Up	203802133	204404694	trans
lnc-RAPH1-6	KIF7	chr15	90152020	90198682	Down	chr2	204102133	204104694	Antisense	Up	203802133	204404694	trans
lnc-RAPH1-6	LAMTOR5	chr1	110943871	110950564	Up	chr2	204102133	204104694	Antisense	Up	203802133	204404694	trans
lnc-RAPH1-6	LOC100128361	chr9	92618050	92620533	Up	chr2	204102133	204104694	Antisense	Up	203802133	204404694	trans
lnc-RAPH1-6	LOC100631378	chr19	38314362	38345855	Up	chr2	204102133	204104694	Antisense	Up	203802133	204404694	trans
lnc-RAPH1-6	LOC101927905	chr12	8388011	8395160	Up	chr2	204102133	204104694	Antisense	Up	203802133	204404694	trans
lnc-RAPH1-6	LOC642361	chr10	81585658	81587358	Up	chr2	204102133	204104694	Antisense	Up	203802133	204404694	trans
lnc-RAPH1-6	LRRC20	chr10	72058729	72142382	Down	chr2	204102133	204104694	Antisense	Up	203802133	204404694	trans
lnc-RAPH1-6	MCM8	chr20	5931298	5975852	Up	chr2	204102133	204104694	Antisense	Up	203802133	204404694	trans
lnc-RAPH1-6	MEA1	chr6	42979832	42981706	Up	chr2	204102133	204104694	Antisense	Up	203802133	204404694	trans
lnc-RAPH1-6	MIF4GD	chr17	73262309	73267308	Up	chr2	204102133	204104694	Antisense	Up	203802133	204404694	trans
lnc-RAPH1-6	MIPEPP3	chr13	21298125	21392923	Up	chr2	204102133	204104694	Antisense	Up	203802133	204404694	trans
lnc-RAPH1-6	NDUFA1	chrX	119005450	119010625	Up	chr2	204102133	204104694	Antisense	Up	203802133	204404694	trans
lnc-RAPH1-6	NTAN1	chr16	15131710	15149921	Up	chr2	204102133	204104694	Antisense	Up	203802133	204404694	trans
lnc-RAPH1-6	OTOG	chr11	17568920	17668697	Down	chr2	204102133	204104694	Antisense	Up	203802133	204404694	trans
lnc-RAPH1-6	PIK3C3	chr18	39535171	39667794	Up	chr2	204102133	204104694	Antisense	Up	203802133	204404694	trans
lnc-RAPH1-6	PLB1	chr2	28680012	28866654	Down	chr2	204102133	204104694	Antisense	Up	203802133	204404694	trans
lnc-RAPH1-6	PLEKHM2	chr1	16010827	16061264	Down	chr2	204102133	204104694	Antisense	Up	203802133	204404694	trans
lnc-RAPH1-6	PPARD	chr6	35310335	35395968	Down	chr2	204102133	204104694	Antisense	Up	203802133	204404694	trans
lnc-RAPH1-6	PRDM2	chr1	14026693	14151574	Up	chr2	204102133	204104694	Antisense	Up	203802133	204404694	trans
lnc-RAPH1-6	PRICKLE1	chr12	42852140	42984157	Down	chr2	204102133	204104694	Antisense	Up	203802133	204404694	trans
lnc-RAPH1-6	PTGER3	chr1	71318036	71513491	Down	chr2	204102133	204104694	Antisense	Up	203802133	204404694	trans
lnc-RAPH1-6	PVRL1	chr11	119494120	119599794	Down	chr2	204102133	204104694	Antisense	Up	203802133	204404694	trans
lnc-RAPH1-6	RAP1B	chr12	69004619	69054372	Up	chr2	204102133	204104694	Antisense	Up	203802133	204404694	trans
lnc-RAPH1-6	RARRES1	chr3	158414681	158450485	Up	chr2	204102133	204104694	Antisense	Up	203802133	204404694	trans
lnc-RAPH1-6	RNMTL1	chr17	685513	695749	Up	chr2	204102133	204104694	Antisense	Up	203802133	204404694	trans
lnc-RAPH1-6	RP2	chrX	46696375	46741793	Up	chr2	204102133	204104694	Antisense	Up	203802133	204404694	trans
lnc-RAPH1-6	RPL12	chr9	130209953	130213684	Up	chr2	204102133	204104694	Antisense	Up	203802133	204404694	trans
lnc-RAPH1-6	RPS2	chr16	2012053	2014861	Up	chr2	204102133	204104694	Antisense	Up	203802133	204404694	trans
lnc-RAPH1-6	SDCBP2-AS1	chr20	1306049	1359378	Up	chr2	204102133	204104694	Antisense	Up	203802133	204404694	trans
lnc-RAPH1-6	SERPINH1	chr11	75273101	75283828	Down	chr2	204102133	204104694	Antisense	Up	203802133	204404694	trans
lnc-RAPH1-6	SLC25A5	chrX	118602363	118605282	Up	chr2	204102133	204104694	Antisense	Up	203802133	204404694	trans
lnc-RAPH1-6	SLC2A4	chr17	7184986	7191576	Down	chr2	204102133	204104694	Antisense	Up	203802133	204404694	trans
lnc-RAPH1-6	SNF8	chr17	47006678	47022479	Up	chr2	204102133	204104694	Antisense	Up	203802133	204404694	trans
lnc-RAPH1-6	SRSF9	chr12	120899471	120907596	Up	chr2	204102133	204104694	Antisense	Up	203802133	204404694	trans
lnc-RAPH1-6	TMEM69	chr1	46152886	46160115	Up	chr2	204102133	204104694	Antisense	Up	203802133	204404694	trans
lnc-RAPH1-6	TOPORS	chr9	32540542	32552551	Up	chr2	204102133	204104694	Antisense	Up	203802133	204404694	trans
lnc-RAPH1-6	TRAPPC4	chr11	118889142	118896164	Up	chr2	204102133	204104694	Antisense	Up	203802133	204404694	trans
lnc-RAPH1-6	TSKU	chr11	76493295	76509198	Up	chr2	204102133	204104694	Antisense	Up	203802133	204404694	trans
lnc-RAPH1-6	TXN2	chr22	36863083	36878077	Up	chr2	204102133	204104694	Antisense	Up	203802133	204404694	trans
lnc-RAPH1-6	USP3-AS1	chr15	63836446	63893788	Up	chr2	204102133	204104694	Antisense	Up	203802133	204404694	trans
lnc-RAPH1-6	UTY	chrY	15360259	15592553	Up	chr2	204102133	204104694	Antisense	Up	203802133	204404694	trans
lnc-RAPH1-6	VAMP3	chr1	7831329	7841492	Up	chr2	204102133	204104694	Antisense	Up	203802133	204404694	trans
lnc-RAPH1-6	ZNF3	chr7	99661656	99680171	Up	chr2	204102133	204104694	Antisense	Up	203802133	204404694	trans
lnc-RAPH1-6	ZNF32	chr10	44139307	44144304	Up	chr2	204102133	204104694	Antisense	Up	203802133	204404694	trans
lnc-RAPH1-6	ZNF350	chr19	52467596	52490109	Up	chr2	204102133	204104694	Antisense	Up	203802133	204404694	trans
lnc-SERHL2-7	ABCB5	chr7	20654830	20816658	Down	chr22	43217870	43219332	Antisense	Up	42917870	43519332	trans
lnc-SERHL2-7	ACOT8	chr20	44470360	44486045	Up	chr22	43217870	43219332	Antisense	Up	42917870	43519332	trans
lnc-SERHL2-7	ADAMTS6	chr5	64444563	64777747	Down	chr22	43217870	43219332	Antisense	Up	42917870	43519332	trans
lnc-SERHL2-7	AIMP2	chr7	6048876	6063465	Up	chr22	43217870	43219332	Antisense	Up	42917870	43519332	trans
lnc-SERHL2-7	ANK2	chr4	113739265	114304896	Down	chr22	43217870	43219332	Antisense	Up	42917870	43519332	trans
lnc-SERHL2-7	ASPH	chr8	62413116	62627155	Down	chr22	43217870	43219332	Antisense	Up	42917870	43519332	trans
lnc-SERHL2-7	ATRNL1	chr10	116853124	117708503	Down	chr22	43217870	43219332	Antisense	Up	42917870	43519332	trans
lnc-SERHL2-7	BANF1	chr11	65769550	65771620	Up	chr22	43217870	43219332	Antisense	Up	42917870	43519332	trans
lnc-SERHL2-7	BCAS2	chr1	115110178	115124260	Up	chr22	43217870	43219332	Antisense	Up	42917870	43519332	trans
lnc-SERHL2-7	BLOC1S6	chr15	45879321	45908197	Up	chr22	43217870	43219332	Antisense	Up	42917870	43519332	trans
lnc-SERHL2-7	BUD31	chr7	99006264	99017239	Up	chr22	43217870	43219332	Antisense	Up	42917870	43519332	trans
lnc-SERHL2-7	CA4	chr17	58227297	58248260	Down	chr22	43217870	43219332	Antisense	Up	42917870	43519332	trans
lnc-SERHL2-7	CACNA1B	chr9	140772241	141019076	Down	chr22	43217870	43219332	Antisense	Up	42917870	43519332	trans
lnc-SERHL2-7	CCDC168	chr13	103381801	103389159	Down	chr22	43217870	43219332	Antisense	Up	42917870	43519332	trans
lnc-SERHL2-7	CDK15	chr2	202655184	202760273	Down	chr22	43217870	43219332	Antisense	Up	42917870	43519332	trans
lnc-SERHL2-7	CHMP4B	chr20	32399110	32442172	Up	chr22	43217870	43219332	Antisense	Up	42917870	43519332	trans
lnc-SERHL2-7	CIB4	chr2	26804070	26864236	Down	chr22	43217870	43219332	Antisense	Up	42917870	43519332	trans
lnc-SERHL2-7	COQ7	chr16	19078921	19091417	Up	chr22	43217870	43219332	Antisense	Up	42917870	43519332	trans
lnc-SERHL2-7	COX20	chr1	244998624	245008359	Up	chr22	43217870	43219332	Antisense	Up	42917870	43519332	trans
lnc-SERHL2-7	CPED1	chr7	120628731	120937498	Down	chr22	43217870	43219332	Antisense	Up	42917870	43519332	trans
lnc-SERHL2-7	DGKB	chr7	14184674	15014402	Down	chr22	43217870	43219332	Antisense	Up	42917870	43519332	trans
lnc-SERHL2-7	EFCAB10	chr7	105565108	105581542	Up	chr22	43217870	43219332	Antisense	Up	42917870	43519332	trans
lnc-SERHL2-7	ENTPD3	chr3	40428647	40470110	Up	chr22	43217870	43219332	Antisense	Up	42917870	43519332	trans
lnc-SERHL2-7	FAM69B	chr9	139607022	139618502	Up	chr22	43217870	43219332	Antisense	Up	42917870	43519332	trans
lnc-SERHL2-7	FAM73B	chr9	131798900	131834361	Down	chr22	43217870	43219332	Antisense	Up	42917870	43519332	trans
lnc-SERHL2-7	FLJ30403	chr19	51591783	51594380	Up	chr22	43217870	43219332	Antisense	Up	42917870	43519332	trans
lnc-SERHL2-7	GPR26	chr10	125425871	125454123	Down	chr22	43217870	43219332	Antisense	Up	42917870	43519332	trans
lnc-SERHL2-7	HIF1A	chr14	62162231	62214976	Up	chr22	43217870	43219332	Antisense	Up	42917870	43519332	trans
lnc-SERHL2-7	HMGN2P46	chr15	45803334	45878488	Up	chr22	43217870	43219332	Antisense	Up	42917870	43519332	trans
lnc-SERHL2-7	HOXA10	chr7	27210210	27219880	Up	chr22	43217870	43219332	Antisense	Up	42917870	43519332	trans
lnc-SERHL2-7	IAH1	chr2	9613787	9636672	Up	chr22	43217870	43219332	Antisense	Up	42917870	43519332	trans
lnc-SERHL2-7	KDM4B	chr19	4969125	5153606	Up	chr22	43217870	43219332	Antisense	Up	42917870	43519332	trans
lnc-SERHL2-7	KIF7	chr15	90152020	90198682	Down	chr22	43217870	43219332	Antisense	Up	42917870	43519332	trans
lnc-SERHL2-7	LAMTOR5	chr1	110943871	110950564	Up	chr22	43217870	43219332	Antisense	Up	42917870	43519332	trans
lnc-SERHL2-7	LOC100128361	chr9	92618050	92620533	Up	chr22	43217870	43219332	Antisense	Up	42917870	43519332	trans
lnc-SERHL2-7	LOC100631378	chr19	38314362	38345855	Up	chr22	43217870	43219332	Antisense	Up	42917870	43519332	trans
lnc-SERHL2-7	LOC101927905	chr12	8388011	8395160	Up	chr22	43217870	43219332	Antisense	Up	42917870	43519332	trans
lnc-SERHL2-7	LOC642361	chr10	81585658	81587358	Up	chr22	43217870	43219332	Antisense	Up	42917870	43519332	trans
lnc-SERHL2-7	LRRC20	chr10	72058729	72142382	Down	chr22	43217870	43219332	Antisense	Up	42917870	43519332	trans
lnc-SERHL2-7	MCM8	chr20	5931298	5975852	Up	chr22	43217870	43219332	Antisense	Up	42917870	43519332	trans
lnc-SERHL2-7	MEA1	chr6	42979832	42981706	Up	chr22	43217870	43219332	Antisense	Up	42917870	43519332	trans
lnc-SERHL2-7	MIF4GD	chr17	73262309	73267308	Up	chr22	43217870	43219332	Antisense	Up	42917870	43519332	trans
lnc-SERHL2-7	MIPEPP3	chr13	21298125	21392923	Up	chr22	43217870	43219332	Antisense	Up	42917870	43519332	trans
lnc-SERHL2-7	NDUFA1	chrX	119005450	119010625	Up	chr22	43217870	43219332	Antisense	Up	42917870	43519332	trans
lnc-SERHL2-7	NTAN1	chr16	15131710	15149921	Up	chr22	43217870	43219332	Antisense	Up	42917870	43519332	trans
lnc-SERHL2-7	OTOG	chr11	17568920	17668697	Down	chr22	43217870	43219332	Antisense	Up	42917870	43519332	trans
lnc-SERHL2-7	PIK3C3	chr18	39535171	39667794	Up	chr22	43217870	43219332	Antisense	Up	42917870	43519332	trans
lnc-SERHL2-7	PLB1	chr2	28680012	28866654	Down	chr22	43217870	43219332	Antisense	Up	42917870	43519332	trans
lnc-SERHL2-7	PLEKHM2	chr1	16010827	16061264	Down	chr22	43217870	43219332	Antisense	Up	42917870	43519332	trans
lnc-SERHL2-7	PPP2CA	chr5	133530025	133561833	Up	chr22	43217870	43219332	Antisense	Up	42917870	43519332	trans
lnc-SERHL2-7	PRDM2	chr1	14026693	14151574	Up	chr22	43217870	43219332	Antisense	Up	42917870	43519332	trans
lnc-SERHL2-7	PRICKLE1	chr12	42852140	42984157	Down	chr22	43217870	43219332	Antisense	Up	42917870	43519332	trans
lnc-SERHL2-7	PTGER3	chr1	71318036	71513491	Down	chr22	43217870	43219332	Antisense	Up	42917870	43519332	trans
lnc-SERHL2-7	PVRL1	chr11	119494120	119599794	Down	chr22	43217870	43219332	Antisense	Up	42917870	43519332	trans
lnc-SERHL2-7	RAP1B	chr12	69004619	69054372	Up	chr22	43217870	43219332	Antisense	Up	42917870	43519332	trans
lnc-SERHL2-7	RARRES1	chr3	158414681	158450485	Up	chr22	43217870	43219332	Antisense	Up	42917870	43519332	trans
lnc-SERHL2-7	RNMTL1	chr17	685513	695749	Up	chr22	43217870	43219332	Antisense	Up	42917870	43519332	trans
lnc-SERHL2-7	RPL12	chr9	130209953	130213684	Up	chr22	43217870	43219332	Antisense	Up	42917870	43519332	trans
lnc-SERHL2-7	RPS2	chr16	2012053	2014861	Up	chr22	43217870	43219332	Antisense	Up	42917870	43519332	trans
lnc-SERHL2-7	SDCBP2-AS1	chr20	1306049	1359378	Up	chr22	43217870	43219332	Antisense	Up	42917870	43519332	trans
lnc-SERHL2-7	SERPINH1	chr11	75273101	75283828	Down	chr22	43217870	43219332	Antisense	Up	42917870	43519332	trans
lnc-SERHL2-7	SLC25A5	chrX	118602363	118605282	Up	chr22	43217870	43219332	Antisense	Up	42917870	43519332	trans
lnc-SERHL2-7	SLC2A4	chr17	7184986	7191576	Down	chr22	43217870	43219332	Antisense	Up	42917870	43519332	trans
lnc-SERHL2-7	SNF8	chr17	47006678	47022479	Up	chr22	43217870	43219332	Antisense	Up	42917870	43519332	trans
lnc-SERHL2-7	SRSF9	chr12	120899471	120907596	Up	chr22	43217870	43219332	Antisense	Up	42917870	43519332	trans
lnc-SERHL2-7	TACC3	chr4	1723227	1746898	Down	chr22	43217870	43219332	Antisense	Up	42917870	43519332	trans
lnc-SERHL2-7	TMEM69	chr1	46152886	46160115	Up	chr22	43217870	43219332	Antisense	Up	42917870	43519332	trans
lnc-SERHL2-7	TOPORS	chr9	32540542	32552551	Up	chr22	43217870	43219332	Antisense	Up	42917870	43519332	trans
lnc-SERHL2-7	TRAPPC4	chr11	118889142	118896164	Up	chr22	43217870	43219332	Antisense	Up	42917870	43519332	trans
lnc-SERHL2-7	TSKU	chr11	76493295	76509198	Up	chr22	43217870	43219332	Antisense	Up	42917870	43519332	trans
lnc-SERHL2-7	TXN2	chr22	36863083	36878077	Up	chr22	43217870	43219332	Antisense	Up	42917870	43519332	trans
lnc-SERHL2-7	USP3-AS1	chr15	63836446	63893788	Up	chr22	43217870	43219332	Antisense	Up	42917870	43519332	trans
lnc-SERHL2-7	UTY	chrY	15360259	15592553	Up	chr22	43217870	43219332	Antisense	Up	42917870	43519332	trans
lnc-SERHL2-7	VAMP3	chr1	7831329	7841492	Up	chr22	43217870	43219332	Antisense	Up	42917870	43519332	trans
lnc-SERHL2-7	ZNF32	chr10	44139307	44144304	Up	chr22	43217870	43219332	Antisense	Up	42917870	43519332	trans
lnc-SERHL2-7	ZNF350	chr19	52467596	52490109	Up	chr22	43217870	43219332	Antisense	Up	42917870	43519332	trans
lnc-SLA2-1	ABAT	chr16	8768422	8878432	Up	chr20	35220846	35230365	Intron	Up	34920846	35530365	trans
lnc-SLA2-1	ADPRM	chr17	10600911	10614550	Up	chr20	35220846	35230365	Intron	Up	34920846	35530365	trans
lnc-SLA2-1	ANGPTL6	chr19	10203014	10213472	Up	chr20	35220846	35230365	Intron	Up	34920846	35530365	trans
lnc-SLA2-1	AP1AR	chr4	113152893	113191203	Up	chr20	35220846	35230365	Intron	Up	34920846	35530365	trans
lnc-SLA2-1	ATF5	chr19	50431959	50437192	Up	chr20	35220846	35230365	Intron	Up	34920846	35530365	trans
lnc-SLA2-1	ATP6V1E1	chr22	18074902	18111584	Up	chr20	35220846	35230365	Intron	Up	34920846	35530365	trans
lnc-SLA2-1	BID	chr22	18216906	18257536	Up	chr20	35220846	35230365	Intron	Up	34920846	35530365	trans
lnc-SLA2-1	C17orf59	chr17	8091652	8093564	Up	chr20	35220846	35230365	Intron	Up	34920846	35530365	trans
lnc-SLA2-1	C1orf192	chr1	161334521	161337664	Up	chr20	35220846	35230365	Intron	Up	34920846	35530365	trans
lnc-SLA2-1	C21orf140	chr21	35772615	35773370	Up	chr20	35220846	35230365	Intron	Up	34920846	35530365	trans
lnc-SLA2-1	C3orf18	chr3	50595462	50608458	Up	chr20	35220846	35230365	Intron	Up	34920846	35530365	trans
lnc-SLA2-1	C6orf52	chr6	10671651	10695030	Up	chr20	35220846	35230365	Intron	Up	34920846	35530365	trans
lnc-SLA2-1	CABP7	chr22	30116073	30127828	Up	chr20	35220846	35230365	Intron	Up	34920846	35530365	trans
lnc-SLA2-1	CARM1	chr19	10982189	11033453	Up	chr20	35220846	35230365	Intron	Up	34920846	35530365	trans
lnc-SLA2-1	CCDC23	chr1	43272723	43282954	Up	chr20	35220846	35230365	Intron	Up	34920846	35530365	trans
lnc-SLA2-1	CCND1	chr11	69455855	69469242	Up	chr20	35220846	35230365	Intron	Up	34920846	35530365	trans
lnc-SLA2-1	CEBPZ	chr2	37428755	37458856	Up	chr20	35220846	35230365	Intron	Up	34920846	35530365	trans
lnc-SLA2-1	CENPT	chr16	67862060	67881714	Up	chr20	35220846	35230365	Intron	Up	34920846	35530365	trans
lnc-SLA2-1	CFL1	chr11	65590493	65629497	Up	chr20	35220846	35230365	Intron	Up	34920846	35530365	trans
lnc-SLA2-1	CIPC	chr14	77564440	77583630	Up	chr20	35220846	35230365	Intron	Up	34920846	35530365	trans
lnc-SLA2-1	CMBL	chr5	10275987	10308138	Up	chr20	35220846	35230365	Intron	Up	34920846	35530365	trans
lnc-SLA2-1	COPS8	chr2	237993955	238009109	Up	chr20	35220846	35230365	Intron	Up	34920846	35530365	trans
lnc-SLA2-1	CORO1B	chr11	67205519	67211292	Up	chr20	35220846	35230365	Intron	Up	34920846	35530365	trans
lnc-SLA2-1	CPSF4L	chr17	71244588	71258491	Up	chr20	35220846	35230365	Intron	Up	34920846	35530365	trans
lnc-SLA2-1	CTNNA1	chr5	137946656	138270723	Up	chr20	35220846	35230365	Intron	Up	34920846	35530365	trans
lnc-SLA2-1	CYB561D2	chr3	50388126	50395891	Up	chr20	35220846	35230365	Intron	Up	34920846	35530365	trans
lnc-SLA2-1	CYB5D1	chr17	7761064	7765600	Up	chr20	35220846	35230365	Intron	Up	34920846	35530365	trans
lnc-SLA2-1	CYFIP1	chr15	22892005	23006016	Up	chr20	35220846	35230365	Intron	Up	34920846	35530365	trans
lnc-SLA2-1	DBNL	chr7	44084239	44109055	Up	chr20	35220846	35230365	Intron	Up	34920846	35530365	trans
lnc-SLA2-1	DNASE1	chr16	3661729	3730144	Up	chr20	35220846	35230365	Intron	Up	34920846	35530365	trans
lnc-SLA2-1	DOK4	chr16	57505863	57521239	Up	chr20	35220846	35230365	Intron	Up	34920846	35530365	trans
lnc-SLA2-1	EBLN3	chr9	37079893	37090398	Up	chr20	35220846	35230365	Intron	Up	34920846	35530365	trans
lnc-SLA2-1	EIF2A	chr3	150264465	150302029	Up	chr20	35220846	35230365	Intron	Up	34920846	35530365	trans
lnc-SLA2-1	EIF2B3	chr1	45316450	45452282	Up	chr20	35220846	35230365	Intron	Up	34920846	35530365	trans
lnc-SLA2-1	EIF5A	chr17	7210318	7215774	Up	chr20	35220846	35230365	Intron	Up	34920846	35530365	trans
lnc-SLA2-1	ELMSAN1	chr14	74181825	74256988	Up	chr20	35220846	35230365	Intron	Up	34920846	35530365	trans
lnc-SLA2-1	EME1	chr17	48450581	48458844	Up	chr20	35220846	35230365	Intron	Up	34920846	35530365	trans
lnc-SLA2-1	EPOR	chr19	11488236	11495018	Up	chr20	35220846	35230365	Intron	Up	34920846	35530365	trans
lnc-SLA2-1	FAM104A	chr17	71203492	71232892	Up	chr20	35220846	35230365	Intron	Up	34920846	35530365	trans
lnc-SLA2-1	FAM219B	chr15	75192328	75199462	Up	chr20	35220846	35230365	Intron	Up	34920846	35530365	trans
lnc-SLA2-1	GCHFR	chr15	41056218	41059906	Up	chr20	35220846	35230365	Intron	Up	34920846	35530365	trans
lnc-SLA2-1	GCLC	chr6	53362139	53481768	Up	chr20	35220846	35230365	Intron	Up	34920846	35530365	trans
lnc-SLA2-1	GGACT	chr13	101183810	101241782	Up	chr20	35220846	35230365	Intron	Up	34920846	35530365	trans
lnc-SLA2-1	GLE1	chr9	131266979	131304567	Up	chr20	35220846	35230365	Intron	Up	34920846	35530365	trans
lnc-SLA2-1	GTF2IRD1P1	chr7	66274980	66309813	Up	chr20	35220846	35230365	Intron	Up	34920846	35530365	trans
lnc-SLA2-1	HGS	chr17	79650356	79670168	Up	chr20	35220846	35230365	Intron	Up	34920846	35530365	trans
lnc-SLA2-1	HNRNPA3	chr2	178077291	178088686	Up	chr20	35220846	35230365	Intron	Up	34920846	35530365	trans
lnc-SLA2-1	ISOC1	chr5	128430444	128449721	Up	chr20	35220846	35230365	Intron	Up	34920846	35530365	trans
lnc-SLA2-1	JAZF1	chr7	27870192	28220362	Up	chr20	35220846	35230365	Intron	Up	34920846	35530365	trans
lnc-SLA2-1	KANSL1L	chr2	210886147	211036107	Up	chr20	35220846	35230365	Intron	Up	34920846	35530365	trans
lnc-SLA2-1	KRTCAP3	chr2	27665233	27669348	Up	chr20	35220846	35230365	Intron	Up	34920846	35530365	trans
lnc-SLA2-1	LOC101928371	chr2	88538720	88575610	Up	chr20	35220846	35230365	Intron	Up	34920846	35530365	trans
lnc-SLA2-1	LOC440434	chr17	38195740	38257249	Up	chr20	35220846	35230365	Intron	Up	34920846	35530365	trans
lnc-SLA2-1	MARCKSL1	chr1	32799433	32801980	Up	chr20	35220846	35230365	Intron	Up	34920846	35530365	trans
lnc-SLA2-1	MCEE	chr2	71336814	71357369	Up	chr20	35220846	35230365	Intron	Up	34920846	35530365	trans
lnc-SLA2-1	MED31	chr17	6546635	6554954	Up	chr20	35220846	35230365	Intron	Up	34920846	35530365	trans
lnc-SLA2-1	MED8	chr1	43849588	43855479	Up	chr20	35220846	35230365	Intron	Up	34920846	35530365	trans
lnc-SLA2-1	METTL5	chr2	170666591	170681441	Up	chr20	35220846	35230365	Intron	Up	34920846	35530365	trans
lnc-SLA2-1	MFSD4	chr1	205538013	205572046	Up	chr20	35220846	35230365	Intron	Up	34920846	35530365	trans
lnc-SLA2-1	MIPOL1	chr14	37667118	38021566	Up	chr20	35220846	35230365	Intron	Up	34920846	35530365	trans
lnc-SLA2-1	MRPL35	chr2	86426478	86440917	Up	chr20	35220846	35230365	Intron	Up	34920846	35530365	trans
lnc-SLA2-1	MTIF3	chr13	28009776	28024739	Up	chr20	35220846	35230365	Intron	Up	34920846	35530365	trans
lnc-SLA2-1	MTOR-AS1	chr1	11203955	11209594	Up	chr20	35220846	35230365	Intron	Up	34920846	35530365	trans
lnc-SLA2-1	NANOS1	chr10	120789228	120793854	Up	chr20	35220846	35230365	Intron	Up	34920846	35530365	trans
lnc-SLA2-1	NAPEPLD	chr7	102740223	102790007	Up	chr20	35220846	35230365	Intron	Up	34920846	35530365	trans
lnc-SLA2-1	NIPA2	chr15	23004684	23034427	Up	chr20	35220846	35230365	Intron	Up	34920846	35530365	trans
lnc-SLA2-1	NUDC	chr1	27226729	27273353	Up	chr20	35220846	35230365	Intron	Up	34920846	35530365	trans
lnc-SLA2-1	OSBPL8	chr12	76745577	76953589	Up	chr20	35220846	35230365	Intron	Up	34920846	35530365	trans
lnc-SLA2-1	PAPLN	chr14	73704205	73741348	Up	chr20	35220846	35230365	Intron	Up	34920846	35530365	trans
lnc-SLA2-1	PCID2	chr13	113831891	113863029	Up	chr20	35220846	35230365	Intron	Up	34920846	35530365	trans
lnc-SLA2-1	PEX11A	chr15	90220995	90234014	Up	chr20	35220846	35230365	Intron	Up	34920846	35530365	trans
lnc-SLA2-1	PGK1	chrX	77320685	77384793	Up	chr20	35220846	35230365	Intron	Up	34920846	35530365	trans
lnc-SLA2-1	PI4K2A	chr10	99344131	99436191	Up	chr20	35220846	35230365	Intron	Up	34920846	35530365	trans
lnc-SLA2-1	PIGB	chr15	55611158	55647846	Up	chr20	35220846	35230365	Intron	Up	34920846	35530365	trans
lnc-SLA2-1	PKMYT1	chr16	3018025	3030540	Up	chr20	35220846	35230365	Intron	Up	34920846	35530365	trans
lnc-SLA2-1	PNN	chr14	39644387	39652422	Up	chr20	35220846	35230365	Intron	Up	34920846	35530365	trans
lnc-SLA2-1	POTEF	chr14	19553365	19590078	Up	chr20	35220846	35230365	Intron	Up	34920846	35530365	trans
lnc-SLA2-1	PPAPDC1B	chr8	38120648	38126761	Up	chr20	35220846	35230365	Intron	Up	34920846	35530365	trans
lnc-SLA2-1	PPIB	chr15	64448011	64455404	Up	chr20	35220846	35230365	Intron	Up	34920846	35530365	trans
lnc-SLA2-1	PRDX1	chr1	45976708	45988719	Up	chr20	35220846	35230365	Intron	Up	34920846	35530365	trans
lnc-SLA2-1	PSMC3IP	chr17	40724333	40729849	Up	chr20	35220846	35230365	Intron	Up	34920846	35530365	trans
lnc-SLA2-1	PYROXD1	chr12	21590549	21623300	Up	chr20	35220846	35230365	Intron	Up	34920846	35530365	trans
lnc-SLA2-1	RAB11B	chr19	8454865	8469318	Up	chr20	35220846	35230365	Intron	Up	34920846	35530365	trans
lnc-SLA2-1	RAB7A	chr3	128444965	128533639	Up	chr20	35220846	35230365	Intron	Up	34920846	35530365	trans
lnc-SLA2-1	RAF1	chr3	12625100	12705725	Up	chr20	35220846	35230365	Intron	Up	34920846	35530365	trans
lnc-SLA2-1	RBM39	chr20	34291531	34330234	Up	chr20	35220846	35230365	Intron	Up	34920846	35530365	trans
lnc-SLA2-1	RFK	chr9	79000433	79009433	Up	chr20	35220846	35230365	Intron	Up	34920846	35530365	trans
lnc-SLA2-1	RFPL1	chr22	29834572	29838444	Up	chr20	35220846	35230365	Intron	Up	34920846	35530365	trans
lnc-SLA2-1	RFPL1S	chr22	29832818	29874164	Up	chr20	35220846	35230365	Intron	Up	34920846	35530365	trans
lnc-SLA2-1	RMDN1	chr8	87480486	87526586	Up	chr20	35220846	35230365	Intron	Up	34920846	35530365	trans
lnc-SLA2-1	RNF220	chr1	44870866	45117396	Up	chr20	35220846	35230365	Intron	Up	34920846	35530365	trans
lnc-SLA2-1	SCAND1	chr20	34541539	34547394	Up	chr20	35220846	35230365	Intron	Up	34920846	35530365	trans
lnc-SLA2-1	SH3BP4	chr2	235860617	235964358	Up	chr20	35220846	35230365	Intron	Up	34920846	35530365	trans
lnc-SLA2-1	SMARCA5	chr4	144434616	144478639	Up	chr20	35220846	35230365	Intron	Up	34920846	35530365	trans
lnc-SLA2-1	SRSF2	chr17	74730197	74733456	Up	chr20	35220846	35230365	Intron	Up	34920846	35530365	trans
lnc-SLA2-1	STAU1	chr20	47729878	47804904	Up	chr20	35220846	35230365	Intron	Up	34920846	35530365	trans
lnc-SLA2-1	STRBP	chr9	125871779	126030855	Up	chr20	35220846	35230365	Intron	Up	34920846	35530365	trans
lnc-SLA2-1	SWSAP1	chr19	11485361	11487627	Up	chr20	35220846	35230365	Intron	Up	34920846	35530365	trans
lnc-SLA2-1	TBC1D9	chr4	141541919	141677274	Up	chr20	35220846	35230365	Intron	Up	34920846	35530365	trans
lnc-SLA2-1	TCEA1	chr8	54879112	54935089	Up	chr20	35220846	35230365	Intron	Up	34920846	35530365	trans
lnc-SLA2-1	TP53INP1	chr8	95938200	95961639	Up	chr20	35220846	35230365	Intron	Up	34920846	35530365	trans
lnc-SLA2-1	WDR1	chr4	10075963	10118573	Up	chr20	35220846	35230365	Intron	Up	34920846	35530365	trans
lnc-SLA2-1	ZBTB44	chr11	130096572	130184581	Up	chr20	35220846	35230365	Intron	Up	34920846	35530365	trans
lnc-SLA2-1	ZC3H13	chr13	46528600	46626894	Up	chr20	35220846	35230365	Intron	Up	34920846	35530365	trans
lnc-SLA2-1	ZNF224	chr19	44598492	44612479	Up	chr20	35220846	35230365	Intron	Up	34920846	35530365	trans
lnc-SLA2-1	ZNF271	chr18	32870246	32890730	Up	chr20	35220846	35230365	Intron	Up	34920846	35530365	trans
lnc-SLA2-1	ZNF550	chr19	58046625	58071231	Up	chr20	35220846	35230365	Intron	Up	34920846	35530365	trans
lnc-SLA2-1	ZNHIT3	chr17	34842473	34855154	Up	chr20	35220846	35230365	Intron	Up	34920846	35530365	trans
lnc-SLC46A2-1	ABAT	chr16	8768422	8878432	Up	chr9	115631917	115636827	Antisense	Up	115331917	115936827	trans
lnc-SLC46A2-1	ADAMTS6	chr5	64444563	64777747	Down	chr9	115631917	115636827	Antisense	Up	115331917	115936827	trans
lnc-SLC46A2-1	ADPRM	chr17	10600911	10614550	Up	chr9	115631917	115636827	Antisense	Up	115331917	115936827	trans
lnc-SLC46A2-1	AFTPH	chr2	64751465	64820139	Up	chr9	115631917	115636827	Antisense	Up	115331917	115936827	trans
lnc-SLC46A2-1	AIMP2	chr7	6048876	6063465	Up	chr9	115631917	115636827	Antisense	Up	115331917	115936827	trans
lnc-SLC46A2-1	ANAPC2	chr9	140069236	140082989	Up	chr9	115631917	115636827	Antisense	Up	115331917	115936827	trans
lnc-SLC46A2-1	ANGPTL6	chr19	10203014	10213472	Up	chr9	115631917	115636827	Antisense	Up	115331917	115936827	trans
lnc-SLC46A2-1	ANKRD37	chr4	186317175	186321782	Up	chr9	115631917	115636827	Antisense	Up	115331917	115936827	trans
lnc-SLC46A2-1	ASPH	chr8	62413116	62627155	Down	chr9	115631917	115636827	Antisense	Up	115331917	115936827	trans
lnc-SLC46A2-1	ATF5	chr19	50431959	50437192	Up	chr9	115631917	115636827	Antisense	Up	115331917	115936827	trans
lnc-SLC46A2-1	ATRNL1	chr10	116853124	117708503	Down	chr9	115631917	115636827	Antisense	Up	115331917	115936827	trans
lnc-SLC46A2-1	BID	chr22	18216906	18257536	Up	chr9	115631917	115636827	Antisense	Up	115331917	115936827	trans
lnc-SLC46A2-1	C15orf40	chr15	83657193	83680393	Up	chr9	115631917	115636827	Antisense	Up	115331917	115936827	trans
lnc-SLC46A2-1	C17orf59	chr17	8091652	8093564	Up	chr9	115631917	115636827	Antisense	Up	115331917	115936827	trans
lnc-SLC46A2-1	C1orf192	chr1	161334521	161337664	Up	chr9	115631917	115636827	Antisense	Up	115331917	115936827	trans
lnc-SLC46A2-1	C3orf18	chr3	50595462	50608458	Up	chr9	115631917	115636827	Antisense	Up	115331917	115936827	trans
lnc-SLC46A2-1	C6orf52	chr6	10671651	10695030	Up	chr9	115631917	115636827	Antisense	Up	115331917	115936827	trans
lnc-SLC46A2-1	CA4	chr17	58227297	58248260	Down	chr9	115631917	115636827	Antisense	Up	115331917	115936827	trans
lnc-SLC46A2-1	CABP7	chr22	30116073	30127828	Up	chr9	115631917	115636827	Antisense	Up	115331917	115936827	trans
lnc-SLC46A2-1	CCDC23	chr1	43272723	43282954	Up	chr9	115631917	115636827	Antisense	Up	115331917	115936827	trans
lnc-SLC46A2-1	CEBPZ	chr2	37428755	37458856	Up	chr9	115631917	115636827	Antisense	Up	115331917	115936827	trans
lnc-SLC46A2-1	CENPT	chr16	67862060	67881714	Up	chr9	115631917	115636827	Antisense	Up	115331917	115936827	trans
lnc-SLC46A2-1	CFL1	chr11	65590493	65629497	Up	chr9	115631917	115636827	Antisense	Up	115331917	115936827	trans
lnc-SLC46A2-1	CIB4	chr2	26804070	26864236	Down	chr9	115631917	115636827	Antisense	Up	115331917	115936827	trans
lnc-SLC46A2-1	CIPC	chr14	77564440	77583630	Up	chr9	115631917	115636827	Antisense	Up	115331917	115936827	trans
lnc-SLC46A2-1	CORO1B	chr11	67205519	67211292	Up	chr9	115631917	115636827	Antisense	Up	115331917	115936827	trans
lnc-SLC46A2-1	CPSF4L	chr17	71244588	71258491	Up	chr9	115631917	115636827	Antisense	Up	115331917	115936827	trans
lnc-SLC46A2-1	EBLN3	chr9	37079893	37090398	Up	chr9	115631917	115636827	Antisense	Up	115331917	115936827	trans
lnc-SLC46A2-1	EIF2A	chr3	150264465	150302029	Up	chr9	115631917	115636827	Antisense	Up	115331917	115936827	trans
lnc-SLC46A2-1	EME1	chr17	48450581	48458844	Up	chr9	115631917	115636827	Antisense	Up	115331917	115936827	trans
lnc-SLC46A2-1	FAM104A	chr17	71203492	71232892	Up	chr9	115631917	115636827	Antisense	Up	115331917	115936827	trans
lnc-SLC46A2-1	FAM69B	chr9	139607022	139618502	Up	chr9	115631917	115636827	Antisense	Up	115331917	115936827	trans
lnc-SLC46A2-1	GCHFR	chr15	41056218	41059906	Up	chr9	115631917	115636827	Antisense	Up	115331917	115936827	trans
lnc-SLC46A2-1	GGACT	chr13	101183810	101241782	Up	chr9	115631917	115636827	Antisense	Up	115331917	115936827	trans
lnc-SLC46A2-1	GTF2IRD1P1	chr7	66274980	66309813	Up	chr9	115631917	115636827	Antisense	Up	115331917	115936827	trans
lnc-SLC46A2-1	HLA-DPA1	chr6	33032346	33048552	Up	chr9	115631917	115636827	Antisense	Up	115331917	115936827	trans
lnc-SLC46A2-1	HNRNPA3	chr2	178077291	178088686	Up	chr9	115631917	115636827	Antisense	Up	115331917	115936827	trans
lnc-SLC46A2-1	KCP	chr7	128870645	128910719	Down	chr9	115631917	115636827	Antisense	Up	115331917	115936827	trans
lnc-SLC46A2-1	KRTCAP3	chr2	27665233	27669348	Up	chr9	115631917	115636827	Antisense	Up	115331917	115936827	trans
lnc-SLC46A2-1	LOC101928371	chr2	88538720	88575610	Up	chr9	115631917	115636827	Antisense	Up	115331917	115936827	trans
lnc-SLC46A2-1	LRRC20	chr10	72058729	72142382	Down	chr9	115631917	115636827	Antisense	Up	115331917	115936827	trans
lnc-SLC46A2-1	MCEE	chr2	71336814	71357369	Up	chr9	115631917	115636827	Antisense	Up	115331917	115936827	trans
lnc-SLC46A2-1	MED31	chr17	6546635	6554954	Up	chr9	115631917	115636827	Antisense	Up	115331917	115936827	trans
lnc-SLC46A2-1	METTL5	chr2	170666591	170681441	Up	chr9	115631917	115636827	Antisense	Up	115331917	115936827	trans
lnc-SLC46A2-1	MFSD4	chr1	205538013	205572046	Up	chr9	115631917	115636827	Antisense	Up	115331917	115936827	trans
lnc-SLC46A2-1	MIPOL1	chr14	37667118	38021566	Up	chr9	115631917	115636827	Antisense	Up	115331917	115936827	trans
lnc-SLC46A2-1	MTIF3	chr13	28009776	28024739	Up	chr9	115631917	115636827	Antisense	Up	115331917	115936827	trans
lnc-SLC46A2-1	MTOR-AS1	chr1	11203955	11209594	Up	chr9	115631917	115636827	Antisense	Up	115331917	115936827	trans
lnc-SLC46A2-1	NANOS1	chr10	120789228	120793854	Up	chr9	115631917	115636827	Antisense	Up	115331917	115936827	trans
lnc-SLC46A2-1	NAPEPLD	chr7	102740223	102790007	Up	chr9	115631917	115636827	Antisense	Up	115331917	115936827	trans
lnc-SLC46A2-1	PIGF	chr2	46808076	46844258	Up	chr9	115631917	115636827	Antisense	Up	115331917	115936827	trans
lnc-SLC46A2-1	PKMYT1	chr16	3018025	3030540	Up	chr9	115631917	115636827	Antisense	Up	115331917	115936827	trans
lnc-SLC46A2-1	POTEF	chr14	19553365	19590078	Up	chr9	115631917	115636827	Antisense	Up	115331917	115936827	trans
lnc-SLC46A2-1	PPAPDC1B	chr8	38120648	38126761	Up	chr9	115631917	115636827	Antisense	Up	115331917	115936827	trans
lnc-SLC46A2-1	PPIB	chr15	64448011	64455404	Up	chr9	115631917	115636827	Antisense	Up	115331917	115936827	trans
lnc-SLC46A2-1	PPP2CA	chr5	133530025	133561833	Up	chr9	115631917	115636827	Antisense	Up	115331917	115936827	trans
lnc-SLC46A2-1	PRDX1	chr1	45976708	45988719	Up	chr9	115631917	115636827	Antisense	Up	115331917	115936827	trans
lnc-SLC46A2-1	PSMC3IP	chr17	40724333	40729849	Up	chr9	115631917	115636827	Antisense	Up	115331917	115936827	trans
lnc-SLC46A2-1	PXN-AS1	chr12	120639094	120650941	Up	chr9	115631917	115636827	Antisense	Up	115331917	115936827	trans
lnc-SLC46A2-1	PYROXD1	chr12	21590549	21623300	Up	chr9	115631917	115636827	Antisense	Up	115331917	115936827	trans
lnc-SLC46A2-1	RAB11B	chr19	8454865	8469318	Up	chr9	115631917	115636827	Antisense	Up	115331917	115936827	trans
lnc-SLC46A2-1	RAF1	chr3	12625100	12705725	Up	chr9	115631917	115636827	Antisense	Up	115331917	115936827	trans
lnc-SLC46A2-1	RAP1B	chr12	69004619	69054372	Up	chr9	115631917	115636827	Antisense	Up	115331917	115936827	trans
lnc-SLC46A2-1	RBM39	chr20	34291531	34330234	Up	chr9	115631917	115636827	Antisense	Up	115331917	115936827	trans
lnc-SLC46A2-1	RFK	chr9	79000433	79009433	Up	chr9	115631917	115636827	Antisense	Up	115331917	115936827	trans
lnc-SLC46A2-1	RFPL1	chr22	29834572	29838444	Up	chr9	115631917	115636827	Antisense	Up	115331917	115936827	trans
lnc-SLC46A2-1	RMDN1	chr8	87480486	87526586	Up	chr9	115631917	115636827	Antisense	Up	115331917	115936827	trans
lnc-SLC46A2-1	RNF220	chr1	44870866	45117396	Up	chr9	115631917	115636827	Antisense	Up	115331917	115936827	trans
lnc-SLC46A2-1	RNMTL1	chr17	685513	695749	Up	chr9	115631917	115636827	Antisense	Up	115331917	115936827	trans
lnc-SLC46A2-1	SCAND1	chr20	34541539	34547394	Up	chr9	115631917	115636827	Antisense	Up	115331917	115936827	trans
lnc-SLC46A2-1	SLC2A4	chr17	7184986	7191576	Down	chr9	115631917	115636827	Antisense	Up	115331917	115936827	trans
lnc-SLC46A2-1	SRSF2	chr17	74730197	74733456	Up	chr9	115631917	115636827	Antisense	Up	115331917	115936827	trans
lnc-SLC46A2-1	SSU72	chr1	1477053	1510249	Up	chr9	115631917	115636827	Antisense	Up	115331917	115936827	trans
lnc-SLC46A2-1	SWSAP1	chr19	11485361	11487627	Up	chr9	115631917	115636827	Antisense	Up	115331917	115936827	trans
lnc-SLC46A2-1	YPEL5	chr2	30369807	30383399	Up	chr9	115631917	115636827	Antisense	Up	115331917	115936827	trans
lnc-SLC46A2-1	ZNF224	chr19	44598492	44612479	Up	chr9	115631917	115636827	Antisense	Up	115331917	115936827	trans
lnc-SLC46A2-1	ZNF3	chr7	99661656	99680171	Up	chr9	115631917	115636827	Antisense	Up	115331917	115936827	trans
lnc-SLC46A2-1	ZNF550	chr19	58046625	58071231	Up	chr9	115631917	115636827	Antisense	Up	115331917	115936827	trans
lnc-SLC46A2-1	ZNHIT3	chr17	34842473	34855154	Up	chr9	115631917	115636827	Antisense	Up	115331917	115936827	trans
lnc-TICAM1-1	ABCB5	chr7	20654830	20816658	Down	chr19	4794993	4795571	Antisense	Up	4494993	5095571	trans
lnc-TICAM1-1	ACOT8	chr20	44470360	44486045	Up	chr19	4794993	4795571	Antisense	Up	4494993	5095571	trans
lnc-TICAM1-1	ADAMTS6	chr5	64444563	64777747	Down	chr19	4794993	4795571	Antisense	Up	4494993	5095571	trans
lnc-TICAM1-1	AIMP2	chr7	6048876	6063465	Up	chr19	4794993	4795571	Antisense	Up	4494993	5095571	trans
lnc-TICAM1-1	ANK2	chr4	113739265	114304896	Down	chr19	4794993	4795571	Antisense	Up	4494993	5095571	trans
lnc-TICAM1-1	ASPH	chr8	62413116	62627155	Down	chr19	4794993	4795571	Antisense	Up	4494993	5095571	trans
lnc-TICAM1-1	ATRNL1	chr10	116853124	117708503	Down	chr19	4794993	4795571	Antisense	Up	4494993	5095571	trans
lnc-TICAM1-1	BANF1	chr11	65769550	65771620	Up	chr19	4794993	4795571	Antisense	Up	4494993	5095571	trans
lnc-TICAM1-1	BCAS2	chr1	115110178	115124260	Up	chr19	4794993	4795571	Antisense	Up	4494993	5095571	trans
lnc-TICAM1-1	BLOC1S6	chr15	45879321	45908197	Up	chr19	4794993	4795571	Antisense	Up	4494993	5095571	trans
lnc-TICAM1-1	BUD31	chr7	99006264	99017239	Up	chr19	4794993	4795571	Antisense	Up	4494993	5095571	trans
lnc-TICAM1-1	CA4	chr17	58227297	58248260	Down	chr19	4794993	4795571	Antisense	Up	4494993	5095571	trans
lnc-TICAM1-1	CACNA1B	chr9	140772241	141019076	Down	chr19	4794993	4795571	Antisense	Up	4494993	5095571	trans
lnc-TICAM1-1	CCDC168	chr13	103381801	103389159	Down	chr19	4794993	4795571	Antisense	Up	4494993	5095571	trans
lnc-TICAM1-1	CHMP4B	chr20	32399110	32442172	Up	chr19	4794993	4795571	Antisense	Up	4494993	5095571	trans
lnc-TICAM1-1	CIB4	chr2	26804070	26864236	Down	chr19	4794993	4795571	Antisense	Up	4494993	5095571	trans
lnc-TICAM1-1	CLUAP1	chr16	3550924	3589048	Up	chr19	4794993	4795571	Antisense	Up	4494993	5095571	trans
lnc-TICAM1-1	COX20	chr1	244998624	245008359	Up	chr19	4794993	4795571	Antisense	Up	4494993	5095571	trans
lnc-TICAM1-1	CPED1	chr7	120628731	120937498	Down	chr19	4794993	4795571	Antisense	Up	4494993	5095571	trans
lnc-TICAM1-1	DGKB	chr7	14184674	15014402	Down	chr19	4794993	4795571	Antisense	Up	4494993	5095571	trans
lnc-TICAM1-1	DPH5	chr1	101455179	101491644	Up	chr19	4794993	4795571	Antisense	Up	4494993	5095571	trans
lnc-TICAM1-1	EFCAB10	chr7	105565108	105581542	Up	chr19	4794993	4795571	Antisense	Up	4494993	5095571	trans
lnc-TICAM1-1	ENTPD3	chr3	40428647	40470110	Up	chr19	4794993	4795571	Antisense	Up	4494993	5095571	trans
lnc-TICAM1-1	FAM69B	chr9	139607022	139618502	Up	chr19	4794993	4795571	Antisense	Up	4494993	5095571	trans
lnc-TICAM1-1	FAM73B	chr9	131798900	131834361	Down	chr19	4794993	4795571	Antisense	Up	4494993	5095571	trans
lnc-TICAM1-1	FLJ30403	chr19	51591783	51594380	Up	chr19	4794993	4795571	Antisense	Up	4494993	5095571	trans
lnc-TICAM1-1	FLNC	chr7	128470431	128499328	Down	chr19	4794993	4795571	Antisense	Up	4494993	5095571	trans
lnc-TICAM1-1	GPR26	chr10	125425871	125454123	Down	chr19	4794993	4795571	Antisense	Up	4494993	5095571	trans
lnc-TICAM1-1	HMGN2P46	chr15	45803334	45878488	Up	chr19	4794993	4795571	Antisense	Up	4494993	5095571	trans
lnc-TICAM1-1	HOXA10	chr7	27210210	27219880	Up	chr19	4794993	4795571	Antisense	Up	4494993	5095571	trans
lnc-TICAM1-1	IAH1	chr2	9613787	9636672	Up	chr19	4794993	4795571	Antisense	Up	4494993	5095571	trans
lnc-TICAM1-1	KDM4B	chr19	4969125	5153606	Up	chr19	4794993	4795571	Antisense	Up	4494993	5095571	cis
lnc-TICAM1-1	LAMTOR5	chr1	110943871	110950564	Up	chr19	4794993	4795571	Antisense	Up	4494993	5095571	trans
lnc-TICAM1-1	LOC100128361	chr9	92618050	92620533	Up	chr19	4794993	4795571	Antisense	Up	4494993	5095571	trans
lnc-TICAM1-1	LOC100631378	chr19	38314362	38345855	Up	chr19	4794993	4795571	Antisense	Up	4494993	5095571	trans
lnc-TICAM1-1	LOC101927905	chr12	8388011	8395160	Up	chr19	4794993	4795571	Antisense	Up	4494993	5095571	trans
lnc-TICAM1-1	LOC642361	chr10	81585658	81587358	Up	chr19	4794993	4795571	Antisense	Up	4494993	5095571	trans
lnc-TICAM1-1	LRRC20	chr10	72058729	72142382	Down	chr19	4794993	4795571	Antisense	Up	4494993	5095571	trans
lnc-TICAM1-1	MEA1	chr6	42979832	42981706	Up	chr19	4794993	4795571	Antisense	Up	4494993	5095571	trans
lnc-TICAM1-1	MIF4GD	chr17	73262309	73267308	Up	chr19	4794993	4795571	Antisense	Up	4494993	5095571	trans
lnc-TICAM1-1	MIPEPP3	chr13	21298125	21392923	Up	chr19	4794993	4795571	Antisense	Up	4494993	5095571	trans
lnc-TICAM1-1	NDUFA1	chrX	119005450	119010625	Up	chr19	4794993	4795571	Antisense	Up	4494993	5095571	trans
lnc-TICAM1-1	NTAN1	chr16	15131710	15149921	Up	chr19	4794993	4795571	Antisense	Up	4494993	5095571	trans
lnc-TICAM1-1	OTOG	chr11	17568920	17668697	Down	chr19	4794993	4795571	Antisense	Up	4494993	5095571	trans
lnc-TICAM1-1	PLB1	chr2	28680012	28866654	Down	chr19	4794993	4795571	Antisense	Up	4494993	5095571	trans
lnc-TICAM1-1	PLEKHM2	chr1	16010827	16061264	Down	chr19	4794993	4795571	Antisense	Up	4494993	5095571	trans
lnc-TICAM1-1	PRDM2	chr1	14026693	14151574	Up	chr19	4794993	4795571	Antisense	Up	4494993	5095571	trans
lnc-TICAM1-1	PRICKLE1	chr12	42852140	42984157	Down	chr19	4794993	4795571	Antisense	Up	4494993	5095571	trans
lnc-TICAM1-1	PTGER3	chr1	71318036	71513491	Down	chr19	4794993	4795571	Antisense	Up	4494993	5095571	trans
lnc-TICAM1-1	RAP1B	chr12	69004619	69054372	Up	chr19	4794993	4795571	Antisense	Up	4494993	5095571	trans
lnc-TICAM1-1	RARRES1	chr3	158414681	158450485	Up	chr19	4794993	4795571	Antisense	Up	4494993	5095571	trans
lnc-TICAM1-1	RNMTL1	chr17	685513	695749	Up	chr19	4794993	4795571	Antisense	Up	4494993	5095571	trans
lnc-TICAM1-1	RP2	chrX	46696375	46741793	Up	chr19	4794993	4795571	Antisense	Up	4494993	5095571	trans
lnc-TICAM1-1	RPS2	chr16	2012053	2014861	Up	chr19	4794993	4795571	Antisense	Up	4494993	5095571	trans
lnc-TICAM1-1	SDCBP2-AS1	chr20	1306049	1359378	Up	chr19	4794993	4795571	Antisense	Up	4494993	5095571	trans
lnc-TICAM1-1	SERPINH1	chr11	75273101	75283828	Down	chr19	4794993	4795571	Antisense	Up	4494993	5095571	trans
lnc-TICAM1-1	SIPA1L2	chr1	232533711	232697304	Down	chr19	4794993	4795571	Antisense	Up	4494993	5095571	trans
lnc-TICAM1-1	SLC25A5	chrX	118602363	118605282	Up	chr19	4794993	4795571	Antisense	Up	4494993	5095571	trans
lnc-TICAM1-1	SLC2A4	chr17	7184986	7191576	Down	chr19	4794993	4795571	Antisense	Up	4494993	5095571	trans
lnc-TICAM1-1	SNF8	chr17	47006678	47022479	Up	chr19	4794993	4795571	Antisense	Up	4494993	5095571	trans
lnc-TICAM1-1	SNRK-AS1	chr3	43391136	43393454	Up	chr19	4794993	4795571	Antisense	Up	4494993	5095571	trans
lnc-TICAM1-1	SRSF9	chr12	120899471	120907596	Up	chr19	4794993	4795571	Antisense	Up	4494993	5095571	trans
lnc-TICAM1-1	TMEM69	chr1	46152886	46160115	Up	chr19	4794993	4795571	Antisense	Up	4494993	5095571	trans
lnc-TICAM1-1	TRAPPC4	chr11	118889142	118896164	Up	chr19	4794993	4795571	Antisense	Up	4494993	5095571	trans
lnc-TICAM1-1	TSKU	chr11	76493295	76509198	Up	chr19	4794993	4795571	Antisense	Up	4494993	5095571	trans
lnc-TICAM1-1	TXN2	chr22	36863083	36878077	Up	chr19	4794993	4795571	Antisense	Up	4494993	5095571	trans
lnc-TICAM1-1	USP3-AS1	chr15	63836446	63893788	Up	chr19	4794993	4795571	Antisense	Up	4494993	5095571	trans
lnc-TICAM1-1	UTY	chrY	15360259	15592553	Up	chr19	4794993	4795571	Antisense	Up	4494993	5095571	trans
lnc-TICAM1-1	ZNF32	chr10	44139307	44144304	Up	chr19	4794993	4795571	Antisense	Up	4494993	5095571	trans
lnc-TICAM1-1	ZNF350	chr19	52467596	52490109	Up	chr19	4794993	4795571	Antisense	Up	4494993	5095571	trans
XLOC_1093926	ABCB5	chr7	20654830	20816658	Down	chr18	56718957	56719257	Intron	Up	56418957	57019257	trans
XLOC_1093926	ACOT8	chr20	44470360	44486045	Up	chr18	56718957	56719257	Intron	Up	56418957	57019257	trans
XLOC_1093926	ADAMTS6	chr5	64444563	64777747	Down	chr18	56718957	56719257	Intron	Up	56418957	57019257	trans
XLOC_1093926	AIMP2	chr7	6048876	6063465	Up	chr18	56718957	56719257	Intron	Up	56418957	57019257	trans
XLOC_1093926	ANK2	chr4	113739265	114304896	Down	chr18	56718957	56719257	Intron	Up	56418957	57019257	trans
XLOC_1093926	ASPH	chr8	62413116	62627155	Down	chr18	56718957	56719257	Intron	Up	56418957	57019257	trans
XLOC_1093926	ATRNL1	chr10	116853124	117708503	Down	chr18	56718957	56719257	Intron	Up	56418957	57019257	trans
XLOC_1093926	BANF1	chr11	65769550	65771620	Up	chr18	56718957	56719257	Intron	Up	56418957	57019257	trans
XLOC_1093926	BCAS2	chr1	115110178	115124260	Up	chr18	56718957	56719257	Intron	Up	56418957	57019257	trans
XLOC_1093926	BLOC1S6	chr15	45879321	45908197	Up	chr18	56718957	56719257	Intron	Up	56418957	57019257	trans
XLOC_1093926	BUD31	chr7	99006264	99017239	Up	chr18	56718957	56719257	Intron	Up	56418957	57019257	trans
XLOC_1093926	CA4	chr17	58227297	58248260	Down	chr18	56718957	56719257	Intron	Up	56418957	57019257	trans
XLOC_1093926	CACNA1B	chr9	140772241	141019076	Down	chr18	56718957	56719257	Intron	Up	56418957	57019257	trans
XLOC_1093926	CCDC168	chr13	103381801	103389159	Down	chr18	56718957	56719257	Intron	Up	56418957	57019257	trans
XLOC_1093926	CDK15	chr2	202655184	202760273	Down	chr18	56718957	56719257	Intron	Up	56418957	57019257	trans
XLOC_1093926	CHMP4B	chr20	32399110	32442172	Up	chr18	56718957	56719257	Intron	Up	56418957	57019257	trans
XLOC_1093926	CIB4	chr2	26804070	26864236	Down	chr18	56718957	56719257	Intron	Up	56418957	57019257	trans
XLOC_1093926	CLUAP1	chr16	3550924	3589048	Up	chr18	56718957	56719257	Intron	Up	56418957	57019257	trans
XLOC_1093926	COX20	chr1	244998624	245008359	Up	chr18	56718957	56719257	Intron	Up	56418957	57019257	trans
XLOC_1093926	CPED1	chr7	120628731	120937498	Down	chr18	56718957	56719257	Intron	Up	56418957	57019257	trans
XLOC_1093926	DGKB	chr7	14184674	15014402	Down	chr18	56718957	56719257	Intron	Up	56418957	57019257	trans
XLOC_1093926	DPH5	chr1	101455179	101491644	Up	chr18	56718957	56719257	Intron	Up	56418957	57019257	trans
XLOC_1093926	EFCAB10	chr7	105565108	105581542	Up	chr18	56718957	56719257	Intron	Up	56418957	57019257	trans
XLOC_1093926	ELP5	chr17	7154735	7163259	Up	chr18	56718957	56719257	Intron	Up	56418957	57019257	trans
XLOC_1093926	ENTPD3	chr3	40428647	40470110	Up	chr18	56718957	56719257	Intron	Up	56418957	57019257	trans
XLOC_1093926	FAM69B	chr9	139607022	139618502	Up	chr18	56718957	56719257	Intron	Up	56418957	57019257	trans
XLOC_1093926	FAM73B	chr9	131798900	131834361	Down	chr18	56718957	56719257	Intron	Up	56418957	57019257	trans
XLOC_1093926	FLJ30403	chr19	51591783	51594380	Up	chr18	56718957	56719257	Intron	Up	56418957	57019257	trans
XLOC_1093926	FLNC	chr7	128470431	128499328	Down	chr18	56718957	56719257	Intron	Up	56418957	57019257	trans
XLOC_1093926	GPR26	chr10	125425871	125454123	Down	chr18	56718957	56719257	Intron	Up	56418957	57019257	trans
XLOC_1093926	HIF1A	chr14	62162231	62214976	Up	chr18	56718957	56719257	Intron	Up	56418957	57019257	trans
XLOC_1093926	HMGN2P46	chr15	45803334	45878488	Up	chr18	56718957	56719257	Intron	Up	56418957	57019257	trans
XLOC_1093926	HOXA10	chr7	27210210	27219880	Up	chr18	56718957	56719257	Intron	Up	56418957	57019257	trans
XLOC_1093926	IAH1	chr2	9613787	9636672	Up	chr18	56718957	56719257	Intron	Up	56418957	57019257	trans
XLOC_1093926	KDM4B	chr19	4969125	5153606	Up	chr18	56718957	56719257	Intron	Up	56418957	57019257	trans
XLOC_1093926	KIF7	chr15	90152020	90198682	Down	chr18	56718957	56719257	Intron	Up	56418957	57019257	trans
XLOC_1093926	LAMTOR5	chr1	110943871	110950564	Up	chr18	56718957	56719257	Intron	Up	56418957	57019257	trans
XLOC_1093926	LOC100128361	chr9	92618050	92620533	Up	chr18	56718957	56719257	Intron	Up	56418957	57019257	trans
XLOC_1093926	LOC100631378	chr19	38314362	38345855	Up	chr18	56718957	56719257	Intron	Up	56418957	57019257	trans
XLOC_1093926	LOC101927905	chr12	8388011	8395160	Up	chr18	56718957	56719257	Intron	Up	56418957	57019257	trans
XLOC_1093926	LRRC20	chr10	72058729	72142382	Down	chr18	56718957	56719257	Intron	Up	56418957	57019257	trans
XLOC_1093926	MCM8	chr20	5931298	5975852	Up	chr18	56718957	56719257	Intron	Up	56418957	57019257	trans
XLOC_1093926	MEA1	chr6	42979832	42981706	Up	chr18	56718957	56719257	Intron	Up	56418957	57019257	trans
XLOC_1093926	MIF4GD	chr17	73262309	73267308	Up	chr18	56718957	56719257	Intron	Up	56418957	57019257	trans
XLOC_1093926	MIPEPP3	chr13	21298125	21392923	Up	chr18	56718957	56719257	Intron	Up	56418957	57019257	trans
XLOC_1093926	NDUFA1	chrX	119005450	119010625	Up	chr18	56718957	56719257	Intron	Up	56418957	57019257	trans
XLOC_1093926	NTAN1	chr16	15131710	15149921	Up	chr18	56718957	56719257	Intron	Up	56418957	57019257	trans
XLOC_1093926	OTOG	chr11	17568920	17668697	Down	chr18	56718957	56719257	Intron	Up	56418957	57019257	trans
XLOC_1093926	PIK3C3	chr18	39535171	39667794	Up	chr18	56718957	56719257	Intron	Up	56418957	57019257	trans
XLOC_1093926	PLB1	chr2	28680012	28866654	Down	chr18	56718957	56719257	Intron	Up	56418957	57019257	trans
XLOC_1093926	PLEKHM2	chr1	16010827	16061264	Down	chr18	56718957	56719257	Intron	Up	56418957	57019257	trans
XLOC_1093926	PRDM2	chr1	14026693	14151574	Up	chr18	56718957	56719257	Intron	Up	56418957	57019257	trans
XLOC_1093926	PRICKLE1	chr12	42852140	42984157	Down	chr18	56718957	56719257	Intron	Up	56418957	57019257	trans
XLOC_1093926	PTGER3	chr1	71318036	71513491	Down	chr18	56718957	56719257	Intron	Up	56418957	57019257	trans
XLOC_1093926	RAP1B	chr12	69004619	69054372	Up	chr18	56718957	56719257	Intron	Up	56418957	57019257	trans
XLOC_1093926	RARRES1	chr3	158414681	158450485	Up	chr18	56718957	56719257	Intron	Up	56418957	57019257	trans
XLOC_1093926	RNMTL1	chr17	685513	695749	Up	chr18	56718957	56719257	Intron	Up	56418957	57019257	trans
XLOC_1093926	RP2	chrX	46696375	46741793	Up	chr18	56718957	56719257	Intron	Up	56418957	57019257	trans
XLOC_1093926	RPS2	chr16	2012053	2014861	Up	chr18	56718957	56719257	Intron	Up	56418957	57019257	trans
XLOC_1093926	SDCBP2-AS1	chr20	1306049	1359378	Up	chr18	56718957	56719257	Intron	Up	56418957	57019257	trans
XLOC_1093926	SERPINH1	chr11	75273101	75283828	Down	chr18	56718957	56719257	Intron	Up	56418957	57019257	trans
XLOC_1093926	SLC25A5	chrX	118602363	118605282	Up	chr18	56718957	56719257	Intron	Up	56418957	57019257	trans
XLOC_1093926	SLC2A4	chr17	7184986	7191576	Down	chr18	56718957	56719257	Intron	Up	56418957	57019257	trans
XLOC_1093926	SNF8	chr17	47006678	47022479	Up	chr18	56718957	56719257	Intron	Up	56418957	57019257	trans
XLOC_1093926	SRSF9	chr12	120899471	120907596	Up	chr18	56718957	56719257	Intron	Up	56418957	57019257	trans
XLOC_1093926	TMEM69	chr1	46152886	46160115	Up	chr18	56718957	56719257	Intron	Up	56418957	57019257	trans
XLOC_1093926	TRAPPC4	chr11	118889142	118896164	Up	chr18	56718957	56719257	Intron	Up	56418957	57019257	trans
XLOC_1093926	TSKU	chr11	76493295	76509198	Up	chr18	56718957	56719257	Intron	Up	56418957	57019257	trans
XLOC_1093926	TXN2	chr22	36863083	36878077	Up	chr18	56718957	56719257	Intron	Up	56418957	57019257	trans
XLOC_1093926	USP3-AS1	chr15	63836446	63893788	Up	chr18	56718957	56719257	Intron	Up	56418957	57019257	trans
XLOC_1093926	UTY	chrY	15360259	15592553	Up	chr18	56718957	56719257	Intron	Up	56418957	57019257	trans
XLOC_1093926	ZNF3	chr7	99661656	99680171	Up	chr18	56718957	56719257	Intron	Up	56418957	57019257	trans
XLOC_1093926	ZNF32	chr10	44139307	44144304	Up	chr18	56718957	56719257	Intron	Up	56418957	57019257	trans
XLOC_1093926	ZNF350	chr19	52467596	52490109	Up	chr18	56718957	56719257	Intron	Up	56418957	57019257	trans
XLOC_2394941	ACOT8	chr20	44470360	44486045	Up	chr7	140420124	140420684	Intergenic	Up	140120124	140720684	trans
XLOC_2394941	ADAMTS6	chr5	64444563	64777747	Down	chr7	140420124	140420684	Intergenic	Up	140120124	140720684	trans
XLOC_2394941	AFTPH	chr2	64751465	64820139	Up	chr7	140420124	140420684	Intergenic	Up	140120124	140720684	trans
XLOC_2394941	AIMP2	chr7	6048876	6063465	Up	chr7	140420124	140420684	Intergenic	Up	140120124	140720684	trans
XLOC_2394941	ARFGAP3	chr22	43192508	43254112	Up	chr7	140420124	140420684	Intergenic	Up	140120124	140720684	trans
XLOC_2394941	ASPH	chr8	62413116	62627155	Down	chr7	140420124	140420684	Intergenic	Up	140120124	140720684	trans
XLOC_2394941	ATRNL1	chr10	116853124	117708503	Down	chr7	140420124	140420684	Intergenic	Up	140120124	140720684	trans
XLOC_2394941	BANF1	chr11	65769550	65771620	Up	chr7	140420124	140420684	Intergenic	Up	140120124	140720684	trans
XLOC_2394941	BCAS2	chr1	115110178	115124260	Up	chr7	140420124	140420684	Intergenic	Up	140120124	140720684	trans
XLOC_2394941	BLOC1S6	chr15	45879321	45908197	Up	chr7	140420124	140420684	Intergenic	Up	140120124	140720684	trans
XLOC_2394941	BUD31	chr7	99006264	99017239	Up	chr7	140420124	140420684	Intergenic	Up	140120124	140720684	trans
XLOC_2394941	CA4	chr17	58227297	58248260	Down	chr7	140420124	140420684	Intergenic	Up	140120124	140720684	trans
XLOC_2394941	CACNA1B	chr9	140772241	141019076	Down	chr7	140420124	140420684	Intergenic	Up	140120124	140720684	trans
XLOC_2394941	CACNA1F	chrX	49061523	49089833	Down	chr7	140420124	140420684	Intergenic	Up	140120124	140720684	trans
XLOC_2394941	CCDC168	chr13	103381801	103389159	Down	chr7	140420124	140420684	Intergenic	Up	140120124	140720684	trans
XLOC_2394941	CHMP4B	chr20	32399110	32442172	Up	chr7	140420124	140420684	Intergenic	Up	140120124	140720684	trans
XLOC_2394941	CLUAP1	chr16	3550924	3589048	Up	chr7	140420124	140420684	Intergenic	Up	140120124	140720684	trans
XLOC_2394941	COL16A1	chr1	32117848	32169920	Down	chr7	140420124	140420684	Intergenic	Up	140120124	140720684	trans
XLOC_2394941	COL3A1	chr2	189839046	189877472	Down	chr7	140420124	140420684	Intergenic	Up	140120124	140720684	trans
XLOC_2394941	COQ7	chr16	19078921	19091417	Up	chr7	140420124	140420684	Intergenic	Up	140120124	140720684	trans
XLOC_2394941	COX20	chr1	244998624	245008359	Up	chr7	140420124	140420684	Intergenic	Up	140120124	140720684	trans
XLOC_2394941	CPED1	chr7	120628731	120937498	Down	chr7	140420124	140420684	Intergenic	Up	140120124	140720684	trans
XLOC_2394941	EFCAB10	chr7	105565108	105581542	Up	chr7	140420124	140420684	Intergenic	Up	140120124	140720684	trans
XLOC_2394941	ELP5	chr17	7154735	7163259	Up	chr7	140420124	140420684	Intergenic	Up	140120124	140720684	trans
XLOC_2394941	ENOPH1	chr4	83351715	83382244	Up	chr7	140420124	140420684	Intergenic	Up	140120124	140720684	trans
XLOC_2394941	FLJ30403	chr19	51591783	51594380	Up	chr7	140420124	140420684	Intergenic	Up	140120124	140720684	trans
XLOC_2394941	GPR26	chr10	125425871	125454123	Down	chr7	140420124	140420684	Intergenic	Up	140120124	140720684	trans
XLOC_2394941	GTF3A	chr13	27998681	28009958	Up	chr7	140420124	140420684	Intergenic	Up	140120124	140720684	trans
XLOC_2394941	HIF1A	chr14	62162231	62214976	Up	chr7	140420124	140420684	Intergenic	Up	140120124	140720684	trans
XLOC_2394941	HIF3A	chr19	46800303	46846690	Down	chr7	140420124	140420684	Intergenic	Up	140120124	140720684	trans
XLOC_2394941	HMGN2P46	chr15	45803334	45878488	Up	chr7	140420124	140420684	Intergenic	Up	140120124	140720684	trans
XLOC_2394941	HOXA10	chr7	27210210	27219880	Up	chr7	140420124	140420684	Intergenic	Up	140120124	140720684	trans
XLOC_2394941	IAH1	chr2	9613787	9636672	Up	chr7	140420124	140420684	Intergenic	Up	140120124	140720684	trans
XLOC_2394941	ITGB4	chr17	73717408	73753899	Down	chr7	140420124	140420684	Intergenic	Up	140120124	140720684	trans
XLOC_2394941	KDM4B	chr19	4969125	5153606	Up	chr7	140420124	140420684	Intergenic	Up	140120124	140720684	trans
XLOC_2394941	KIF7	chr15	90152020	90198682	Down	chr7	140420124	140420684	Intergenic	Up	140120124	140720684	trans
XLOC_2394941	LAMA1	chr18	6941743	7117813	Down	chr7	140420124	140420684	Intergenic	Up	140120124	140720684	trans
XLOC_2394941	LAMTOR5	chr1	110943871	110950564	Up	chr7	140420124	140420684	Intergenic	Up	140120124	140720684	trans
XLOC_2394941	LOC100507412	chr22	NA	NA	Down	chr7	140420124	140420684	Intergenic	Up	140120124	140720684	trans
XLOC_2394941	MAST3	chr19	18208603	18262502	Down	chr7	140420124	140420684	Intergenic	Up	140120124	140720684	trans
XLOC_2394941	MCM8	chr20	5931298	5975852	Up	chr7	140420124	140420684	Intergenic	Up	140120124	140720684	trans
XLOC_2394941	MEA1	chr6	42979832	42981706	Up	chr7	140420124	140420684	Intergenic	Up	140120124	140720684	trans
XLOC_2394941	MIF4GD	chr17	73262309	73267308	Up	chr7	140420124	140420684	Intergenic	Up	140120124	140720684	trans
XLOC_2394941	MIPEPP3	chr13	21298125	21392923	Up	chr7	140420124	140420684	Intergenic	Up	140120124	140720684	trans
XLOC_2394941	NDUFA1	chrX	119005450	119010625	Up	chr7	140420124	140420684	Intergenic	Up	140120124	140720684	trans
XLOC_2394941	NOS2	chr17	26083792	26127525	Down	chr7	140420124	140420684	Intergenic	Up	140120124	140720684	trans
XLOC_2394941	NTAN1	chr16	15131710	15149921	Up	chr7	140420124	140420684	Intergenic	Up	140120124	140720684	trans
XLOC_2394941	NTRK2	chr9	87283466	87638505	Down	chr7	140420124	140420684	Intergenic	Up	140120124	140720684	trans
XLOC_2394941	OSBPL3	chr7	24836158	25021253	Down	chr7	140420124	140420684	Intergenic	Up	140120124	140720684	trans
XLOC_2394941	OTOG	chr11	17568920	17668697	Down	chr7	140420124	140420684	Intergenic	Up	140120124	140720684	trans
XLOC_2394941	OTOGL	chr12	80603233	80772870	Down	chr7	140420124	140420684	Intergenic	Up	140120124	140720684	trans
XLOC_2394941	PABPC4	chr1	40026488	40042462	Up	chr7	140420124	140420684	Intergenic	Up	140120124	140720684	trans
XLOC_2394941	PPP2CA	chr5	133530025	133561833	Up	chr7	140420124	140420684	Intergenic	Up	140120124	140720684	trans
XLOC_2394941	PRDM2	chr1	14026693	14151574	Up	chr7	140420124	140420684	Intergenic	Up	140120124	140720684	trans
XLOC_2394941	PRICKLE1	chr12	42852140	42984157	Down	chr7	140420124	140420684	Intergenic	Up	140120124	140720684	trans
XLOC_2394941	PTGER3	chr1	71318036	71513491	Down	chr7	140420124	140420684	Intergenic	Up	140120124	140720684	trans
XLOC_2394941	PYGM	chr11	64513861	64527769	Down	chr7	140420124	140420684	Intergenic	Up	140120124	140720684	trans
XLOC_2394941	RAP1B	chr12	69004619	69054372	Up	chr7	140420124	140420684	Intergenic	Up	140120124	140720684	trans
XLOC_2394941	RPL12	chr9	130209953	130213684	Up	chr7	140420124	140420684	Intergenic	Up	140120124	140720684	trans
XLOC_2394941	RPS2	chr16	2012053	2014861	Up	chr7	140420124	140420684	Intergenic	Up	140120124	140720684	trans
XLOC_2394941	RYR1	chr19	38924339	39078204	Down	chr7	140420124	140420684	Intergenic	Up	140120124	140720684	trans
XLOC_2394941	SLC25A11	chr17	4840425	4843546	Up	chr7	140420124	140420684	Intergenic	Up	140120124	140720684	trans
XLOC_2394941	SLC25A5	chrX	118602363	118605282	Up	chr7	140420124	140420684	Intergenic	Up	140120124	140720684	trans
XLOC_2394941	SLC26A5	chr7	102993177	103086624	Down	chr7	140420124	140420684	Intergenic	Up	140120124	140720684	trans
XLOC_2394941	SLC2A4	chr17	7184986	7191576	Down	chr7	140420124	140420684	Intergenic	Up	140120124	140720684	trans
XLOC_2394941	SNF8	chr17	47006678	47022479	Up	chr7	140420124	140420684	Intergenic	Up	140120124	140720684	trans
XLOC_2394941	SPTBN5	chr15	42140345	42186275	Down	chr7	140420124	140420684	Intergenic	Up	140120124	140720684	trans
XLOC_2394941	SPTSSA	chr14	34901995	34931562	Up	chr7	140420124	140420684	Intergenic	Up	140120124	140720684	trans
XLOC_2394941	SRSF9	chr12	120899471	120907596	Up	chr7	140420124	140420684	Intergenic	Up	140120124	140720684	trans
XLOC_2394941	TGFBR3	chr1	92145902	92371892	Down	chr7	140420124	140420684	Intergenic	Up	140120124	140720684	trans
XLOC_2394941	TMEM69	chr1	46152886	46160115	Up	chr7	140420124	140420684	Intergenic	Up	140120124	140720684	trans
XLOC_2394941	TOPORS	chr9	32540542	32552551	Up	chr7	140420124	140420684	Intergenic	Up	140120124	140720684	trans
XLOC_2394941	TRAPPC4	chr11	118889142	118896164	Up	chr7	140420124	140420684	Intergenic	Up	140120124	140720684	trans
XLOC_2394941	TTC40	chr10	134621896	134756327	Down	chr7	140420124	140420684	Intergenic	Up	140120124	140720684	trans
XLOC_2394941	TXN2	chr22	36863083	36878077	Up	chr7	140420124	140420684	Intergenic	Up	140120124	140720684	trans
XLOC_2394941	USP3-AS1	chr15	63836446	63893788	Up	chr7	140420124	140420684	Intergenic	Up	140120124	140720684	trans
XLOC_2394941	UTY	chrY	15360259	15592553	Up	chr7	140420124	140420684	Intergenic	Up	140120124	140720684	trans
XLOC_2394941	VAMP3	chr1	7831329	7841492	Up	chr7	140420124	140420684	Intergenic	Up	140120124	140720684	trans
XLOC_2394941	ZNF32	chr10	44139307	44144304	Up	chr7	140420124	140420684	Intergenic	Up	140120124	140720684	trans
XLOC_2394941	ZNF350	chr19	52467596	52490109	Up	chr7	140420124	140420684	Intergenic	Up	140120124	140720684	trans
XLOC_515910	C19orf73	chr19	49621655	49622397	Up	chr12	11210018	11324363	Sense	Up	10910018	11624363	trans
XLOC_515910	CACNA1B	chr9	140772241	141019076	Down	chr12	11210018	11324363	Sense	Up	10910018	11624363	trans
XLOC_515910	CCK	chr3	42299317	42307699	Up	chr12	11210018	11324363	Sense	Up	10910018	11624363	trans
XLOC_515910	CHCHD5	chr2	113341817	113346852	Up	chr12	11210018	11324363	Sense	Up	10910018	11624363	trans
XLOC_515910	CHMP4C	chr8	82644669	82671750	Up	chr12	11210018	11324363	Sense	Up	10910018	11624363	trans
XLOC_515910	ENTPD3	chr3	40428647	40470110	Up	chr12	11210018	11324363	Sense	Up	10910018	11624363	trans
XLOC_515910	ERMAP	chr1	43282795	43310660	Up	chr12	11210018	11324363	Sense	Up	10910018	11624363	trans
XLOC_515910	LOC100505549	chr18	57630331	57669283	Up	chr12	11210018	11324363	Sense	Up	10910018	11624363	trans
XLOC_515910	MTERF4	chr2	242011584	242041747	Up	chr12	11210018	11324363	Sense	Up	10910018	11624363	trans
XLOC_515910	NAA20	chr20	19997760	20014299	Up	chr12	11210018	11324363	Sense	Up	10910018	11624363	trans
XLOC_515910	NSA2	chr5	74062817	74072737	Up	chr12	11210018	11324363	Sense	Up	10910018	11624363	trans
XLOC_515910	RRP7B	chr22	42951229	42978044	Up	chr12	11210018	11324363	Sense	Up	10910018	11624363	trans
XLOC_515910	SMAGP	chr12	51638342	51664674	Up	chr12	11210018	11324363	Sense	Up	10910018	11624363	trans
XLOC_515910	SRRM4	chr12	119419300	119600856	Down	chr12	11210018	11324363	Sense	Up	10910018	11624363	trans
XLOC_515910	TMEM91	chr19	41856816	41889988	Up	chr12	11210018	11324363	Sense	Up	10910018	11624363	trans
XLOC_515910	TOPORS	chr9	32540542	32552551	Up	chr12	11210018	11324363	Sense	Up	10910018	11624363	trans
