# Supplementary material for: LncRNAs induce oxidative stress and spermatogenesis by regulating endoplasmic reticulum genes and pathways
Source: Aging (Albany NY). 2021 May 6;13(10):13764–87. doi: 10.18632/aging.202971 (PMC8202879; doi:10.18632/aging.202971)
Supplement: Supplementary Table 15 [file aging-13-202971-s015.csv]

Supplementary Table 15. cis_trans_SR.
lncrna	mrna	chr_mrna	start_mrna	end_mrna	diff_mrna	chr_lncrna	start_lncrna	end_lncrna	sub_lncrna	diff_lncrna	uplim	downlim	regulation
ARSD-AS1	ANK2	chr4	113739265	114304896	Down	chrX	2822944	2824122	Intron	Up	2522944	3124122	trans
ARSD-AS1	CHMP4B	chr20	32399110	32442172	Up	chrX	2822944	2824122	Intron	Up	2522944	3124122	trans
CCDC144NL-AS1	RER1	chr1	2323267	2336883	Up	chr17	20771745	20905589	Sense	Up	20471745	21205589	trans
CFLAR-AS1	ANK2	chr4	113739265	114304896	Down	chr2	202005011	202022546	Sense	Up	201705011	202322546	trans
CFLAR-AS1	CHMP4B	chr20	32399110	32442172	Up	chr2	202005011	202022546	Sense	Up	201705011	202322546	trans
CNOT10-AS1	CHMP4B	chr20	32399110	32442172	Up	chr3	32772126	32778946	Antisense	Up	32472126	33078946	trans
FLNB-AS1	RER1	chr1	2323267	2336883	Up	chr3	58148273	58156363	Antisense	Up	57848273	58456363	trans
LAMTOR5-AS1	RER1	chr1	2323267	2336883	Up	chr1	110889936	110974982	Sense	Up	110589936	111274982	trans
LIMD1-AS1	RER1	chr1	2323267	2336883	Up	chr3	45718142	45730626	Sense	Up	45418142	46030626	trans
LINC00094	RER1	chr1	2323267	2336883	Up	chr9	136890607	136899788	Sense	Up	136590607	137199788	trans
LINC00526	SPCS3	NA	NA	NA	NA	chr18	5232874	5238597	Sense	Up	4932874	5538597	trans
lnc-AARS-1	CHMP4B	chr20	32399110	32442172	Up	chr16	70349542	70380650	Sense	Up	70049542	70680650	trans
lnc-ABAT-3	RER1	chr1	2323267	2336883	Up	chr16	8882696	8889519	Antisense	Up	8582696	9189519	trans
lnc-ABCC4-1	SGTB	NA	NA	NA	NA	chr13	95954704	95956401	Intergenic	Up	95654704	96256401	trans
lnc-AC002553.1-1	SEC61A2	chr10	12171636	12211960	Up	chr17	15943785	15944587	Antisense	Up	15643785	16244587	trans
lnc-AC007390.5.1-4	CHMP4B	chr20	32399110	32442172	Up	chr2	37375672	37376447	Antisense	Up	37075672	37676447	trans
lnc-AC018816.3.1-11	CHMP4B	chr20	32399110	32442172	Up	chr3	4725382	4752120	Antisense	Up	4425382	5052120	trans
lnc-ACMSD-6	TAPT1	NA	NA	NA	NA	chr2	134924890	134928661	Intergenic	Down	134624890	135228661	trans
lnc-ADAMTS18-1	CHMP4B	chr20	32399110	32442172	Up	chr16	77235370	77283854	Antisense	Up	76935370	77583854	trans
lnc-ADC-1	SEC62	chr3	169684423	169716161	Up	chr1	33452552	33498070	Antisense	Up	33152552	33798070	trans
lnc-ADCK3-1	RER1	chr1	2323267	2336883	Up	chr1	227179840	227180907	Intron	Up	226879840	227480907	trans
lnc-AF127577.1-3	CHMP4B	chr20	32399110	32442172	Up	chr21	16333629	16336554	Antisense	Up	16033629	16636554	trans
lnc-ALG3-1	SGTB	NA	NA	NA	NA	chr3	183942734	183948316	Intergenic	Up	183642734	184248316	trans
lnc-ALPK2-6	CHMP4B	chr20	32399110	32442172	Up	chr18	56419410	56421130	Intergenic	Up	56119410	56721130	trans
lnc-AMDHD1-2	CHMP4B	chr20	32399110	32442172	Up	chr12	96419100	96421749	Antisense	Up	96119100	96721749	trans
lnc-AMDHD2-2	SPCS1	chr3	52738971	52742182	Up	chr16	2577080	2581423	Sense	Up	2277080	2881423	trans
lnc-AMN-1	RER1	chr1	2323267	2336883	Up	chr14	103399910	103403514	Intron	Up	103099910	103703514	trans
lnc-AMN-3	SPCS3	NA	NA	NA	NA	chr14	103474076	103475968	Antisense	Up	103174076	103775968	trans
lnc-ANGPT2-2	CHMP4B	chr20	32399110	32442172	Up	chr8	6261076	6264663	Sense	Up	5961076	6564663	trans
lnc-ANGPTL2-1	CHMP4B	chr20	32399110	32442172	Up	chr9	129976313	129984186	Intergenic	Up	129676313	130284186	trans
lnc-AP3S1-15	CHMP4B	chr20	32399110	32442172	Up	chr5	114598201	114599145	Antisense	Up	114298201	114899145	trans
lnc-AP3S1-6	RER1	chr1	2323267	2336883	Up	chr5	114512863	114516020	Antisense	Up	114212863	114816020	trans
lnc-AQP8-1	SGTB	NA	NA	NA	NA	chr16	25249638	25250608	Intron	Up	24949638	25550608	trans
lnc-ARHGEF38-1	RER1	chr1	2323267	2336883	Up	chr4	106599296	106629250	Antisense	Up	106299296	106929250	trans
lnc-ARHGEF40-1	SPCS1	chr3	52738971	52742182	Up	chr14	21558545	21560491	Antisense	Up	21258545	21860491	trans
lnc-ARVCF-4	RER1	chr1	2323267	2336883	Up	chr22	20050502	20058066	Antisense	Up	19750502	20358066	trans
lnc-ASCC2-1	CHMP4B	chr20	32399110	32442172	Up	chr22	30363671	30498134	Sense	Up	30063671	30798134	trans
lnc-ATP11B-6	CHMP4B	chr20	32399110	32442172	Up	chr3	182655945	182657951	Antisense	Up	182355945	182957951	trans
lnc-ATP2C2-1	SPCS3	NA	NA	NA	NA	chr16	84529204	84531101	Antisense	Up	84229204	84831101	trans
lnc-ATP6V1C2-2	SEC61A2	chr10	12171636	12211960	Up	chr2	10728455	10744956	Antisense	Up	10428455	11044956	trans
lnc-ATP6V1C2-4	CHMP4B	chr20	32399110	32442172	Up	chr2	10938337	10942757	Antisense	Up	10638337	11242757	trans
lnc-B4GALT3-1	RER1	chr1	2323267	2336883	Up	chr1	161123549	161129139	Antisense	Up	160823549	161429139	trans
lnc-BRMS1L-7	CHMP4B	chr20	32399110	32442172	Up	chr14	36194269	36194855	Antisense	Up	35894269	36494855	trans
lnc-C11orf49-3	ANK2	chr4	113739265	114304896	Down	chr11	47196407	47196619	Antisense	Up	46896407	47496619	trans
lnc-C11orf49-3	CHMP4B	chr20	32399110	32442172	Up	chr11	47196407	47196619	Antisense	Up	46896407	47496619	trans
lnc-C14orf102-1	ANK2	chr4	113739265	114304896	Down	chr14	90868866	90871579	Antisense	Up	90568866	91171579	trans
lnc-C14orf102-1	CHMP4B	chr20	32399110	32442172	Up	chr14	90868866	90871579	Antisense	Up	90568866	91171579	trans
lnc-C14orf28-2	CHMP4B	chr20	32399110	32442172	Up	chr14	45283074	45395793	Sense	Up	44983074	45695793	trans
lnc-C15orf44-1	SGTB	NA	NA	NA	NA	chr15	65903569	65948184	Sense	Up	65603569	66248184	trans
lnc-C18orf42-3	CHMP4B	chr20	32399110	32442172	Up	chr18	5240253	5241166	Intron	Up	4940253	5541166	trans
lnc-C19orf44-5	SGTB	NA	NA	NA	NA	chr19	16683434	16686151	Antisense	Up	16383434	16986151	trans
lnc-C1orf106-1	ANK2	chr4	113739265	114304896	Down	chr1	200993058	201012201	Antisense	Down	200693058	201312201	trans
lnc-C1orf106-1	CHMP4B	chr20	32399110	32442172	Up	chr1	200993058	201012201	Antisense	Down	200693058	201312201	trans
lnc-C1orf112-3	CHMP4B	chr20	32399110	32442172	Up	chr1	169824994	169842473	Antisense	Up	169524994	170142473	trans
lnc-C1orf123-1	RER1	chr1	2323267	2336883	Up	chr1	53676127	53679447	Antisense	Up	53376127	53979447	trans
lnc-C1orf124-1	SEC62	chr3	169684423	169716161	Up	chr1	231464487	231467017	Intergenic	Up	231164487	231767017	trans
lnc-C1orf124-1	SRP19	chr5	112196919	112205485	Up	chr1	231464487	231467017	Intergenic	Up	231164487	231767017	trans
lnc-C1orf167-2	RER1	chr1	2323267	2336883	Up	chr1	11845227	11848012	Antisense	Up	11545227	12148012	trans
lnc-C1orf43-3	RER1	chr1	2323267	2336883	Up	chr1	154213642	154214184	Antisense	Up	153913642	154514184	trans
lnc-C1orf85-1	RER1	chr1	2323267	2336883	Up	chr1	156259886	156262339	Antisense	Up	155959886	156562339	trans
lnc-C1QL3-1	SRP9	chr1	225965531	225978168	Up	chr10	16554078	16556515	Sense	Up	16254078	16856515	trans
lnc-C20orf187-1	ANK2	chr4	113739265	114304896	Down	chr20	10653575	10982411	Antisense	Down	10353575	11282411	trans
lnc-C20orf187-1	CHMP4B	chr20	32399110	32442172	Up	chr20	10653575	10982411	Antisense	Down	10353575	11282411	trans
lnc-C3orf17-2	ANK2	chr4	113739265	114304896	Down	chr3	112709293	112710000	Antisense	Up	112409293	113010000	trans
lnc-C3orf17-2	CHMP4B	chr20	32399110	32442172	Up	chr3	112709293	112710000	Antisense	Up	112409293	113010000	trans
lnc-C3orf23-2	RER1	chr1	2323267	2336883	Up	chr3	44482423	44486946	Intron	Up	44182423	44786946	trans
lnc-C5orf32-3	CHMP4B	chr20	32399110	32442172	Up	chr5	139554772	139661637	Sense	Up	139254772	139961637	trans
lnc-C5orf35-3	SEC61A2	chr10	12171636	12211960	Up	chr5	56223700	56225400	Antisense	Up	55923700	56525400	trans
lnc-C9orf152-5	CHMP4B	chr20	32399110	32442172	Up	chr9	112932548	112938715	Antisense	Up	112632548	113238715	trans
lnc-C9orf66-7	SGTB	NA	NA	NA	NA	chr9	503056	504746	Intron	Up	203056	804746	trans
lnc-CCDC152-2	ANK2	chr4	113739265	114304896	Down	chr5	42806495	42807099	Antisense	Up	42506495	43107099	trans
lnc-CCDC152-2	CHMP4B	chr20	32399110	32442172	Up	chr5	42806495	42807099	Antisense	Up	42506495	43107099	trans
lnc-CCDC159-4	RER1	chr1	2323267	2336883	Up	chr19	11432831	11434871	Antisense	Up	11132831	11734871	trans
lnc-CCDC68-1	ANK2	chr4	113739265	114304896	Down	chr18	52553096	52565314	Antisense	Up	52253096	52865314	trans
lnc-CCL27-1	CHMP4B	chr20	32399110	32442172	Up	chr9	34661876	34666171	Sense	Up	34361876	34966171	trans
lnc-CD151-2	CHMP4B	chr20	32399110	32442172	Up	chr11	838179	839831	Sense	Up	538179	1139831	trans
lnc-CD47-7	SGTB	NA	NA	NA	NA	chr3	106967220	106970678	Intron	Up	106667220	107270678	trans
lnc-CDC42SE1-1	SGTB	NA	NA	NA	NA	chr1	151028058	151043079	Sense	Up	150728058	151343079	trans
lnc-CDIPT-1	RER1	chr1	2323267	2336883	Up	chr16	29819965	29832573	Antisense	Up	29519965	30132573	trans
lnc-CDK12-2	ANK2	chr4	113739265	114304896	Down	chr17	37558045	37562486	Antisense	Up	37258045	37862486	trans
lnc-CDK12-2	CHMP4B	chr20	32399110	32442172	Up	chr17	37558045	37562486	Antisense	Up	37258045	37862486	trans
lnc-CDK20-12	CHMP4B	chr20	32399110	32442172	Up	chr9	90999792	91002839	Intergenic	Up	90699792	91302839	trans
lnc-CEBPG-4	RER1	chr1	2323267	2336883	Up	chr19	33790839	33792074	Antisense	Up	33490839	34092074	trans
lnc-CHAC1-4	SEC61A2	chr10	12171636	12211960	Up	chr15	41309004	41320091	Antisense	Up	41009004	41620091	trans
lnc-CHADL-3	CHMP4B	chr20	32399110	32442172	Up	chr22	41565193	41579148	Antisense	Up	41265193	41879148	trans
lnc-CHSY1-6	CHMP4B	chr20	32399110	32442172	Up	chr15	101456346	101456828	Antisense	Up	101156346	101756828	trans
lnc-CLDN6-4	SPCS1	chr3	52738971	52742182	Up	chr16	3022793	3030474	Sense	Up	2722793	3330474	trans
lnc-CNDP1-1	CHMP4B	chr20	32399110	32442172	Up	chr18	72259009	72262618	Antisense	Up	71959009	72562618	trans
lnc-COL28A1-1	SPCS3	NA	NA	NA	NA	chr7	7589263	7606627	Sense	Up	7289263	7906627	trans
lnc-COMMD5-1	RER1	chr1	2323267	2336883	Up	chr8	146063400	146067770	Antisense	Up	145763400	146367770	trans
lnc-CPM-1	CHMP4B	chr20	32399110	32442172	Up	chr12	69235067	69237017	Antisense	Up	68935067	69537017	trans
lnc-CPM-2	SEC61A2	chr10	12171636	12211960	Up	chr12	69068150	69081535	Sense	Up	68768150	69381535	trans
lnc-CPSF4-1	SEC62	chr3	169684423	169716161	Up	chr7	99070557	99079949	Sense	Up	98770557	99379949	trans
lnc-CPSF4-1	SRP19	chr5	112196919	112205485	Up	chr7	99070557	99079949	Sense	Up	98770557	99379949	trans
lnc-CRHR1-5	CHMP4B	chr20	32399110	32442172	Up	chr17	43596137	43596388	Antisense	Up	43296137	43896388	trans
lnc-CTNS-1	ANK2	chr4	113739265	114304896	Down	chr17	3566188	3567184	Antisense	Up	3266188	3867184	trans
lnc-CTRL-2	RER1	chr1	2323267	2336883	Up	chr16	67961542	67963577	Sense	Up	67661542	68263577	trans
lnc-CTSZ-7	ANK2	chr4	113739265	114304896	Down	chr20	57486023	57486241	Antisense	Up	57186023	57786241	trans
lnc-CTSZ-7	CHMP4B	chr20	32399110	32442172	Up	chr20	57486023	57486241	Antisense	Up	57186023	57786241	trans
lnc-CYB5D2-2	CHMP4B	chr20	32399110	32442172	Up	chr17	4067203	4068007	Intron	Up	3767203	4368007	trans
lnc-CYB5R2-3	ANK2	chr4	113739265	114304896	Down	chr11	7405072	7534884	Sense	Down	7105072	7834884	trans
lnc-CYB5R2-3	CHMP4B	chr20	32399110	32442172	Up	chr11	7405072	7534884	Sense	Down	7105072	7834884	trans
lnc-CYFIP1-3	CHMP4B	chr20	32399110	32442172	Up	chr15	23096868	23099971	Antisense	Up	22796868	23399971	trans
lnc-CYS1-5	CHMP4B	chr20	32399110	32442172	Up	chr2	10194547	10194993	Antisense	Up	9894547	10494993	trans
lnc-DBNDD1-1	ANK2	chr4	113739265	114304896	Down	chr16	90061105	90062978	Intron	Up	89761105	90362978	trans
lnc-DCAF6-1	RER1	chr1	2323267	2336883	Up	chr1	167905020	167960577	Sense	Up	167605020	168260577	trans
lnc-DDHD2-1	RYR2	chr1	237205505	237997288	Down	chr8	38133405	38134198	Antisense	Up	37833405	38434198	trans
lnc-DDX54-1	SPCS1	chr3	52738971	52742182	Up	chr12	113623428	113629966	Antisense	Up	113323428	113929966	trans
lnc-DHRS7B-3	RER1	chr1	2323267	2336883	Up	chr17	20903059	20903636	Intron	Up	20603059	21203636	trans
lnc-DLEU7-5	CHMP4B	chr20	32399110	32442172	Up	chr13	51508739	51522354	Antisense	Up	51208739	51822354	trans
lnc-DONSON-1	RER1	chr1	2323267	2336883	Up	chr21	34931847	34950669	Sense	Up	34631847	35250669	trans
lnc-DPY30-4	TAPT1	NA	NA	NA	NA	chr2	32070220	32092722	Intergenic	Down	31770220	32392722	trans
lnc-DR1-2	SGTB	NA	NA	NA	NA	chr1	93830112	93838174	Intergenic	Up	93530112	94138174	trans
lnc-DUPD1-2	SGTB	NA	NA	NA	NA	chr10	76762812	76784932	Antisense	Up	76462812	77084932	trans
lnc-DYNC1I1-5	ANK2	chr4	113739265	114304896	Down	chr7	95746499	95750754	Antisense	Up	95446499	96050754	trans
lnc-DYNC1I1-5	CHMP4B	chr20	32399110	32442172	Up	chr7	95746499	95750754	Antisense	Up	95446499	96050754	trans
lnc-EBNA1BP2-1	CHMP4B	chr20	32399110	32442172	Up	chr1	43637111	43727581	Antisense	Up	43337111	44027581	trans
lnc-EEF1A1-1	CHMP4B	chr20	32399110	32442172	Up	chr6	74201747	74202465	Antisense	Up	73901747	74502465	trans
lnc-EEF1B2-1	RER1	chr1	2323267	2336883	Up	chr2	206980270	206987047	Antisense	Up	206680270	207287047	trans
lnc-EEF1B2-3	CHMP4B	chr20	32399110	32442172	Up	chr2	206854308	206865582	Antisense	Up	206554308	207165582	trans
lnc-EGR4-2	CHMP4B	chr20	32399110	32442172	Up	chr2	73674657	73678809	Antisense	Up	73374657	73978809	trans
lnc-ERP44-1	ANK2	chr4	113739265	114304896	Down	chr9	102677358	102692178	Antisense	Up	102377358	102992178	trans
lnc-ETNK2-7	CHMP4B	chr20	32399110	32442172	Up	chr1	203769300	203769971	Antisense	Up	203469300	204069971	trans
lnc-F8-1	RER1	chr1	2323267	2336883	Up	chrX	154236711	154255273	Intron	Up	153936711	154555273	trans
lnc-FABP3-3	CHMP4B	chr20	32399110	32442172	Up	chr1	31849908	31850331	Intergenic	Up	31549908	32150331	trans
lnc-FAM102B-2	CHMP4B	chr20	32399110	32442172	Up	chr1	109201326	109202665	Antisense	Up	108901326	109502665	trans
lnc-FAM161B-1	RER1	chr1	2323267	2336883	Up	chr14	74362866	74389342	Antisense	Up	74062866	74689342	trans
lnc-FAM164C-2	CHMP4B	chr20	32399110	32442172	Up	chr14	75548827	75549988	Antisense	Up	75248827	75849988	trans
lnc-FAM198B-1	SRP9	chr1	225965531	225978168	Up	chr4	159120247	159123554	Intergenic	Up	158820247	159423554	trans
lnc-FAM43A-2	CHMP4B	chr20	32399110	32442172	Up	chr3	194353651	194366130	Antisense	Up	194053651	194666130	trans
lnc-FAM78A-3	RER1	chr1	2323267	2336883	Up	chr9	134008251	134042892	Antisense	Up	133708251	134342892	trans
lnc-FAM82A1-10	CHMP4B	chr20	32399110	32442172	Up	chr2	38522792	38523984	Intron	Up	38222792	38823984	trans
lnc-FAM96B-3	SEC61A2	chr10	12171636	12211960	Up	chr16	66978562	66978999	Antisense	Up	66678562	67278999	trans
lnc-FAT2-1	ANK2	chr4	113739265	114304896	Down	chr5	150870772	150871937	Antisense	Up	150570772	151171937	trans
lnc-FAT2-1	CHMP4B	chr20	32399110	32442172	Up	chr5	150870772	150871937	Antisense	Up	150570772	151171937	trans
lnc-FBXL22-1	RER1	chr1	2323267	2336883	Up	chr15	63967344	64005957	Antisense	Up	63667344	64305957	trans
lnc-FBXL3-1	SEC62	chr3	169684423	169716161	Up	chr13	77564116	77601220	Antisense	Up	77264116	77901220	trans
lnc-FBXL3-1	SRP19	chr5	112196919	112205485	Up	chr13	77564116	77601220	Antisense	Up	77264116	77901220	trans
lnc-FER-1	SPCS3	NA	NA	NA	NA	chr5	108061405	108063994	Antisense	Up	107761405	108363994	trans
lnc-FKBP2-1	ANK2	chr4	113739265	114304896	Down	chr11	64013435	64015689	Antisense	Up	63713435	64315689	trans
lnc-FKBP2-1	CHMP4B	chr20	32399110	32442172	Up	chr11	64013435	64015689	Antisense	Up	63713435	64315689	trans
lnc-FKBP8-1	RER1	chr1	2323267	2336883	Up	chr19	18668584	18680185	Antisense	Up	18368584	18980185	trans
lnc-FLNB-3	SEC61A1	chr3	127770484	127790526	Up	chr3	57886575	57887872	Intron	Up	57586575	58187872	trans
lnc-FLNB-3	SEC62	chr3	169684423	169716161	Up	chr3	57886575	57887872	Intron	Up	57586575	58187872	trans
lnc-FLNB-3	SRP19	chr5	112196919	112205485	Up	chr3	57886575	57887872	Intron	Up	57586575	58187872	trans
lnc-FMN1-2	CHMP4B	chr20	32399110	32442172	Up	chr15	33527752	33539797	Sense	Down	33227752	33839797	trans
lnc-FN1-4	RER1	chr1	2323267	2336883	Up	chr2	216184530	216416504	Sense	Up	215884530	216716504	trans
lnc-FOXK2-3	RER1	chr1	2323267	2336883	Up	chr17	80561512	80602538	Sense	Up	80261512	80902538	trans
lnc-FOXM1-1	SEC61A2	chr10	12171636	12211960	Up	chr12	3048888	3050025	Antisense	Up	2748888	3350025	trans
lnc-FOXN1-1	ANK2	chr4	113739265	114304896	Down	chr17	26900134	26901261	Antisense	Up	26600134	27201261	trans
lnc-FOXN1-1	CHMP4B	chr20	32399110	32442172	Up	chr17	26900134	26901261	Antisense	Up	26600134	27201261	trans
lnc-FRAT1-2	RER1	chr1	2323267	2336883	Up	chr10	99084502	99093019	Antisense	Up	98784502	99393019	trans
lnc-GCC2-1	CHMP4B	chr20	32399110	32442172	Up	chr2	109128382	109128606	Intergenic	Up	108828382	109428606	trans
lnc-GDPD4-1	RER1	chr1	2323267	2336883	Up	chr11	76835552	76837201	Intergenic	Up	76535552	77137201	trans
lnc-GDPD4-2	SGTB	NA	NA	NA	NA	chr11	76666460	76689663	Antisense	Up	76366460	76989663	trans
lnc-GIP-5	ANK2	chr4	113739265	114304896	Down	chr17	47007751	47010680	Sense	Up	46707751	47310680	trans
lnc-GIP-5	CHMP4B	chr20	32399110	32442172	Up	chr17	47007751	47010680	Sense	Up	46707751	47310680	trans
lnc-GJA4-1	SGTB	NA	NA	NA	NA	chr1	35316294	35317156	Intron	Up	35016294	35617156	trans
lnc-GLDN-3	CHMP4B	chr20	32399110	32442172	Up	chr15	51706293	51791030	Antisense	Up	51406293	52091030	trans
lnc-GMPR2-1	RER1	chr1	2323267	2336883	Up	chr14	24710239	24711633	Antisense	Up	24410239	25011633	trans
lnc-GNS-3	ANK2	chr4	113739265	114304896	Down	chr12	65089970	65090330	Intergenic	Up	64789970	65390330	trans
lnc-GNS-3	CHMP4B	chr20	32399110	32442172	Up	chr12	65089970	65090330	Intergenic	Up	64789970	65390330	trans
lnc-GSG1L-1	SPCS3	NA	NA	NA	NA	chr16	27690260	27730129	Antisense	Up	27390260	28030129	trans
lnc-GSTO2-4	SGTB	NA	NA	NA	NA	chr10	106071898	106073639	Intron	Up	105771898	106373639	trans
lnc-GTPBP1-1	CHMP4B	chr20	32399110	32442172	Up	chr22	39130729	39134770	Antisense	Up	38830729	39434770	trans
lnc-H2AFY2-1	CHMP4B	chr20	32399110	32442172	Up	chr10	71968554	71969331	Antisense	Up	71668554	72269331	trans
lnc-H3F3B-1	SPCS1	chr3	52738971	52742182	Up	chr17	73779187	73781974	Sense	Up	73479187	74081974	trans
lnc-HAAO-1	SEC61A1	chr3	127770484	127790526	Up	chr2	43028633	43038968	Intergenic	Up	42728633	43338968	trans
lnc-HAAO-1	SEC62	chr3	169684423	169716161	Up	chr2	43028633	43038968	Intergenic	Up	42728633	43338968	trans
lnc-HAAO-1	SRP19	chr5	112196919	112205485	Up	chr2	43028633	43038968	Intergenic	Up	42728633	43338968	trans
lnc-HAND1-3	SPCS1	chr3	52738971	52742182	Up	chr5	153798763	153799256	Intron	Up	153498763	154099256	trans
lnc-HAUS1-1	RER1	chr1	2323267	2336883	Up	chr18	43676292	43678434	Antisense	Up	43376292	43978434	trans
lnc-HEATR4-6	SPCS3	NA	NA	NA	NA	chr14	74034941	74036537	Antisense	Up	73734941	74336537	trans
lnc-HMBOX1-2	RER1	chr1	2323267	2336883	Up	chr8	28924795	28925971	Antisense	Up	28624795	29225971	trans
lnc-HOXA13-1	RER1	chr1	2323267	2336883	Up	chr7	27226865	27232305	Antisense	Up	26926865	27532305	trans
lnc-HSPG2-1	CHMP4B	chr20	32399110	32442172	Up	chr1	22350486	22357707	Sense	Up	22050486	22657707	trans
lnc-IARS2-2	SRP9	chr1	225965531	225978168	Up	chr1	220206305	220224929	Antisense	Up	219906305	220524929	trans
lnc-ID4-2	ANK2	chr4	113739265	114304896	Down	chr6	19538727	19539166	Intergenic	Up	19238727	19839166	trans
lnc-ID4-2	CHMP4B	chr20	32399110	32442172	Up	chr6	19538727	19539166	Intergenic	Up	19238727	19839166	trans
lnc-IGFBP7-1	CHMP4B	chr20	32399110	32442172	Up	chr4	57896938	57931769	Sense	Up	57596938	58231769	trans
lnc-IL2RG-4	ANK2	chr4	113739265	114304896	Down	chrX	70320133	70334750	Sense	Up	70020133	70634750	trans
lnc-IL2RG-4	CHMP4B	chr20	32399110	32442172	Up	chrX	70320133	70334750	Sense	Up	70020133	70634750	trans
lnc-IL31RA-1	ANK2	chr4	113739265	114304896	Down	chr5	55231970	55237555	Intron	Up	54931970	55537555	trans
lnc-IL31RA-1	CHMP4B	chr20	32399110	32442172	Up	chr5	55231970	55237555	Intron	Up	54931970	55537555	trans
lnc-ILKAP-4	CHMP4B	chr20	32399110	32442172	Up	chr2	238998758	239000269	Antisense	Up	238698758	239300269	trans
lnc-INTS4-1	SGTB	NA	NA	NA	NA	chr11	77577457	77581137	Antisense	Up	77277457	77881137	trans
lnc-JMJD7-PLA2G4B-2	RER1	chr1	2323267	2336883	Up	chr15	42184973	42192352	Antisense	Up	41884973	42492352	trans
lnc-KANK3-3	CHMP4B	chr20	32399110	32442172	Up	chr19	8166026	8537075	Sense	Up	7866026	8837075	trans
lnc-KAT8-2	CHMP4B	chr20	32399110	32442172	Up	chr16	31144693	31145331	Intron	Up	30844693	31445331	trans
lnc-KATNAL2-5	CHMP4B	chr20	32399110	32442172	Up	chr18	44632316	44634433	Antisense	Up	44332316	44934433	trans
lnc-KB-1980E6.3.1-6	CHMP4B	chr20	32399110	32442172	Up	chr8	103268619	103270049	Antisense	Up	102968619	103570049	trans
lnc-KBTBD3-1	CHMP4B	chr20	32399110	32442172	Up	chr11	105956716	105972702	Antisense	Up	105656716	106272702	trans
lnc-KCNT1-7	SPCS1	chr3	52738971	52742182	Up	chr9	138847104	138847404	Antisense	Up	138547104	139147404	trans
lnc-KCTD18-1	RER1	chr1	2323267	2336883	Up	chr2	201314169	201343184	Antisense	Up	201014169	201643184	trans
lnc-KIAA0564-2	SPCS1	chr3	52738971	52742182	Up	chr13	42876242	42884992	Antisense	Up	42576242	43184992	trans
lnc-KIAA1429-6	CHMP4B	chr20	32399110	32442172	Up	chr8	95718688	95720871	Antisense	Up	95418688	96020871	trans
lnc-KIF13B-2	RER1	chr1	2323267	2336883	Up	chr8	28779447	28922453	Antisense	Up	28479447	29222453	trans
lnc-KLHL36-2	RER1	chr1	2323267	2336883	Up	chr16	84599207	84612543	Antisense	Up	84299207	84912543	trans
lnc-KRT80-10	CHMP4B	chr20	32399110	32442172	Up	chr12	52389346	52390807	Antisense	Up	52089346	52690807	trans
lnc-LALBA-1	SEC62	chr3	169684423	169716161	Up	chr12	48877069	48894744	Antisense	Up	48577069	49194744	trans
lnc-LALBA-1	SRP19	chr5	112196919	112205485	Up	chr12	48877069	48894744	Antisense	Up	48577069	49194744	trans
lnc-LAMA5-3	SPCS3	NA	NA	NA	NA	chr20	60875854	60878715	Antisense	Up	60575854	61178715	trans
lnc-LAT2-2	CHMP4B	chr20	32399110	32442172	Up	chr7	73645995	73646353	Intron	Up	73345995	73946353	trans
lnc-LEO1-4	CHMP4B	chr20	32399110	32442172	Up	chr15	52179756	52193320	Antisense	Up	51879756	52493320	trans
lnc-LEPRE1-1	CHMP4B	chr20	32399110	32442172	Up	chr1	43241468	43250520	Intergenic	Up	42941468	43550520	trans
lnc-LPIN2-1	ANK2	chr4	113739265	114304896	Down	chr18	2688561	2833063	Antisense	Up	2388561	3133063	trans
lnc-LPIN2-1	CHMP4B	chr20	32399110	32442172	Up	chr18	2688561	2833063	Antisense	Up	2388561	3133063	trans
lnc-LRRC1-5	CHMP4B	chr20	32399110	32442172	Up	chr6	53367982	53371717	Antisense	Up	53067982	53671717	trans
lnc-LRRC38-2	CHMP4B	chr20	32399110	32442172	Up	chr1	14104759	14105625	Antisense	Up	13804759	14405625	trans
lnc-LRRN4-2	CHMP4B	chr20	32399110	32442172	Up	chr20	6018019	6019573	Antisense	Up	5718019	6319573	trans
lnc-LTBR-6	CHMP4B	chr20	32399110	32442172	Up	chr12	6472666	6479967	Antisense	Up	6172666	6779967	trans
lnc-LXN-1	ANK2	chr4	113739265	114304896	Down	chr3	158261843	158288858	Sense	Up	157961843	158588858	trans
lnc-LXN-1	CHMP4B	chr20	32399110	32442172	Up	chr3	158261843	158288858	Sense	Up	157961843	158588858	trans
lnc-LYZL1-10	SGTB	NA	NA	NA	NA	chr10	29783276	29784637	Antisense	Up	29483276	30084637	trans
lnc-MACC1-1	SEC61A2	chr10	12171636	12211960	Up	chr7	19938141	20180103	Sense	Up	19638141	20480103	trans
lnc-MARCH10-1	SPCS1	chr3	52738971	52742182	Up	chr17	61006841	61044171	Intron	Up	60706841	61344171	trans
lnc-MEST-2	SEC61A2	chr10	12171636	12211960	Up	chr7	130147500	130148123	Antisense	Up	129847500	130448123	trans
lnc-MFSD9-4	ANK2	chr4	113739265	114304896	Down	chr2	102789080	102798568	Antisense	Up	102489080	103098568	trans
lnc-MFSD9-4	CHMP4B	chr20	32399110	32442172	Up	chr2	102789080	102798568	Antisense	Up	102489080	103098568	trans
lnc-MIXL1-2	CHMP4B	chr20	32399110	32442172	Up	chr1	226335703	226342772	Antisense	Up	226035703	226642772	trans
lnc-MLST8-1	ANK2	chr4	113739265	114304896	Down	chr16	2261997	2262864	Antisense	Up	1961997	2562864	trans
lnc-MLST8-1	CHMP4B	chr20	32399110	32442172	Up	chr16	2261997	2262864	Antisense	Up	1961997	2562864	trans
lnc-MMP15-1	CHMP4B	chr20	32399110	32442172	Up	chr16	58150788	58153257	Antisense	Up	57850788	58453257	trans
lnc-MORC2-1	ANK2	chr4	113739265	114304896	Down	chr22	31373501	31373844	Antisense	Up	31073501	31673844	trans
lnc-MORC2-1	CHMP4B	chr20	32399110	32442172	Up	chr22	31373501	31373844	Antisense	Up	31073501	31673844	trans
lnc-MRPL48-1	RER1	chr1	2323267	2336883	Up	chr11	73471385	73472115	Antisense	Up	73171385	73772115	trans
lnc-MRPS30-8	SEC62	chr3	169684423	169716161	Up	chr5	44826177	44836603	Intergenic	Up	44526177	45136603	trans
lnc-MRPS30-8	SRP19	chr5	112196919	112205485	Up	chr5	44826177	44836603	Intergenic	Up	44526177	45136603	trans
lnc-MRPS30-8	SSR3	NA	NA	NA	NA	chr5	44826177	44836603	Intergenic	Up	44526177	45136603	trans
lnc-MTERF-8	SGTB	NA	NA	NA	NA	chr7	91569190	91570451	Antisense	Up	91269190	91870451	trans
lnc-MTRR-7	SPCS1	chr3	52738971	52742182	Up	chr5	7850989	7878151	Antisense	Up	7550989	8178151	trans
lnc-MYL4-1	CHMP4B	chr20	32399110	32442172	Up	chr17	45247191	45248415	Antisense	Up	44947191	45548415	trans
lnc-MZT2B-1	CHMP4B	chr20	32399110	32442172	Up	chr2	130887193	130896990	Sense	Up	130587193	131196990	trans
lnc-NCKAP1-1	SEC62	chr3	169684423	169716161	Up	chr2	183948132	183973247	Antisense	Up	183648132	184273247	trans
lnc-NDE1-3	CHMP4B	chr20	32399110	32442172	Up	chr16	15702330	15704420	Antisense	Up	15402330	16004420	trans
lnc-NDUFAF2-1	CHMP4B	chr20	32399110	32442172	Up	chr5	60213316	60215400	Antisense	Up	59913316	60515400	trans
lnc-NDUFV1-6	CHMP4B	chr20	32399110	32442172	Up	chr11	67429962	67430223	Intron	Up	67129962	67730223	trans
lnc-NFKBIB-5	SEC61A2	chr10	12171636	12211960	Up	chr19	39342921	39344120	Antisense	Up	39042921	39644120	trans
lnc-NIT2-1	SGTB	NA	NA	NA	NA	chr3	100077111	100080481	Intergenic	Up	99777111	100380481	trans
lnc-NME6-2	RER1	chr1	2323267	2336883	Up	chr3	48309403	48312995	Antisense	Up	48009403	48612995	trans
lnc-NMNAT1-3	RER1	chr1	2323267	2336883	Up	chr1	9908375	9910212	Antisense	Up	9608375	10210212	trans
lnc-NNT-3	SGTB	NA	NA	NA	NA	chr5	43484060	43509458	Antisense	Up	43184060	43809458	trans
lnc-NPB-3	RER1	chr1	2323267	2336883	Up	chr17	79890273	79890934	Antisense	Up	79590273	80190934	trans
lnc-NRIP2-2	RER1	chr1	2323267	2336883	Up	chr12	2906301	2913104	Antisense	Up	2606301	3213104	trans
lnc-NSA2-3	SGTB	NA	NA	NA	NA	chr5	74014116	74018454	Sense	Up	73714116	74318454	trans
lnc-NTAN1-1	RER1	chr1	2323267	2336883	Up	chr16	15111962	15114345	Antisense	Up	14811962	15414345	trans
lnc-OAZ3-6	CHMP4B	chr20	32399110	32442172	Up	chr1	151728016	151732387	Antisense	Up	151428016	152032387	trans
lnc-OBSCN-3	RER1	chr1	2323267	2336883	Up	chr1	228581990	228584668	Antisense	Up	228281990	228884668	trans
lnc-ODZ1-6	CHMP4B	chr20	32399110	32442172	Up	chrX	123235613	123236403	Antisense	Up	122935613	123536403	trans
lnc-OLR1-3	RER1	chr1	2323267	2336883	Up	chr12	10370461	10372350	Antisense	Up	10070461	10672350	trans
lnc-OR6S1-1	RER1	chr1	2323267	2336883	Up	chr14	21161638	21175279	Antisense	Up	20861638	21475279	trans
lnc-OR7C2-1	SEC61A2	chr10	12171636	12211960	Up	chr19	15050245	16748905	Sense	Up	14750245	17048905	trans
lnc-ORC3-2	SPCS1	chr3	52738971	52742182	Up	chr6	88273569	88275290	Antisense	Up	87973569	88575290	trans
lnc-ORC4-1	CHMP4B	chr20	32399110	32442172	Up	chr2	148656969	148660525	Antisense	Up	148356969	148960525	trans
lnc-OTUD6B-2	CHMP4B	chr20	32399110	32442172	Up	chr8	92075739	92082050	Antisense	Up	91775739	92382050	trans
lnc-PAH-3	ANK2	chr4	113739265	114304896	Down	chr12	103310350	103352188	Sense	Down	103010350	103652188	trans
lnc-PAH-3	CHMP4B	chr20	32399110	32442172	Up	chr12	103310350	103352188	Sense	Down	103010350	103652188	trans
lnc-PARP2-1	CHMP4B	chr20	32399110	32442172	Up	chr14	20773888	20774970	Antisense	Up	20473888	21074970	trans
lnc-PDZD9-1	SGTB	NA	NA	NA	NA	chr16	22094576	22103552	Antisense	Up	21794576	22403552	trans
lnc-PEAK1.1-2	SGTB	NA	NA	NA	NA	chr15	77713043	77776947	Antisense	Up	77413043	78076947	trans
lnc-PEAK1.1-5	CHMP4B	chr20	32399110	32442172	Up	chr15	77777398	77777941	Antisense	Up	77477398	78077941	trans
lnc-PEX14-1	SPCS3	NA	NA	NA	NA	chr1	10532344	10596629	Sense	Up	10232344	10896629	trans
lnc-PEX7-2	SPCS1	chr3	52738971	52742182	Up	chr6	136871798	136873692	Antisense	Up	136571798	137173692	trans
lnc-PFDN4-3	SGTB	NA	NA	NA	NA	chr20	52522413	52555874	Intergenic	Up	52222413	52855874	trans
lnc-PGBD5-1	SPCS3	NA	NA	NA	NA	chr1	230416057	230417639	Antisense	Up	230116057	230717639	trans
lnc-PHLDB1-1	ANK2	chr4	113739265	114304896	Down	chr11	118575315	118620973	Antisense	Up	118275315	118920973	trans
lnc-PHLDB1-1	CHMP4B	chr20	32399110	32442172	Up	chr11	118575315	118620973	Antisense	Up	118275315	118920973	trans
lnc-PHYHIP-1	SRP9	chr1	225965531	225978168	Up	chr8	22110021	22132686	Intergenic	Up	21810021	22432686	trans
lnc-PI4KA-2	CHMP4B	chr20	32399110	32442172	Up	chr22	21243493	21245502	Antisense	Up	20943493	21545502	trans
lnc-PIGL-1	ANK2	chr4	113739265	114304896	Down	chr17	16229798	16250988	Antisense	Up	15929798	16550988	trans
lnc-PIGL-1	CHMP4B	chr20	32399110	32442172	Up	chr17	16229798	16250988	Antisense	Up	15929798	16550988	trans
lnc-PIGU-3	CHMP4B	chr20	32399110	32442172	Up	chr20	33097347	33097815	Intergenic	Up	32797347	33397815	trans
lnc-PLD3-3	SPCS1	chr3	52738971	52742182	Up	chr19	40818458	40825438	Intergenic	Up	40518458	41125438	trans
lnc-PMM2-1	ANK2	chr4	113739265	114304896	Down	chr16	8947168	8948204	Intron	Up	8647168	9248204	trans
lnc-POC1B-GALNT4-2	CHMP4B	chr20	32399110	32442172	Up	chr12	89932992	89941782	Intergenic	Up	89632992	90241782	trans
lnc-POLH-1	CHMP4B	chr20	32399110	32442172	Up	chr6	43529608	43530156	Antisense	Up	43229608	43830156	trans
lnc-PPAP2A-1	ANK2	chr4	113739265	114304896	Down	chr5	54717353	54719628	Antisense	Up	54417353	55019628	trans
lnc-PPAP2A-1	CHMP4B	chr20	32399110	32442172	Up	chr5	54717353	54719628	Antisense	Up	54417353	55019628	trans
lnc-PPIAL4C-9	CHMP4B	chr20	32399110	32442172	Up	chr1	149320440	149375252	Sense	Up	149020440	149675252	trans
lnc-PPP1R14B-1	CHMP4B	chr20	32399110	32442172	Up	chr11	64014410	64016966	Sense	Up	63714410	64316966	trans
lnc-PPP1R26-1	CHMP4B	chr20	32399110	32442172	Up	chr9	138359933	138364095	Antisense	Up	138059933	138664095	trans
lnc-PPP4C-1	ANK2	chr4	113739265	114304896	Down	chr16	30103638	30104110	Antisense	Up	29803638	30404110	trans
lnc-PPP4C-8	SPCS1	chr3	52738971	52742182	Up	chr16	30125432	30125826	Antisense	Up	29825432	30425826	trans
lnc-PRR15-4	SGTB	NA	NA	NA	NA	chr7	29688993	29689733	Intron	Up	29388993	29989733	trans
lnc-PSME4-2	CHMP4B	chr20	32399110	32442172	Up	chr2	54307110	54307417	Intergenic	Up	54007110	54607417	trans
lnc-PTDSS1-1	CHMP4B	chr20	32399110	32442172	Up	chr8	97247654	97250262	Antisense	Up	96947654	97550262	trans
lnc-PTGER4-4	CHMP4B	chr20	32399110	32442172	Up	chr5	40756151	40763126	Antisense	Up	40456151	41063126	trans
lnc-PTPRCAP-1	RER1	chr1	2323267	2336883	Up	chr11	67198837	67202870	Antisense	Up	66898837	67502870	trans
lnc-PTRHD1-1	SPCS3	NA	NA	NA	NA	chr2	25042237	25043665	Sense	Up	24742237	25343665	trans
lnc-QDPR-2	CHMP4B	chr20	32399110	32442172	Up	chr4	17632546	17634062	Sense	Up	17332546	17934062	trans
lnc-RAB15-1	SPCS3	NA	NA	NA	NA	chr14	65517921	65520344	Intergenic	Up	65217921	65820344	trans
lnc-RADIL-1	RER1	chr1	2323267	2336883	Up	chr7	4807256	4811074	Antisense	Up	4507256	5111074	trans
lnc-RAPH1-6	CHMP4B	chr20	32399110	32442172	Up	chr2	204102133	204104694	Antisense	Up	203802133	204404694	trans
lnc-RASAL1-1	CHMP4B	chr20	32399110	32442172	Up	chr12	113345432	113455556	Antisense	Up	113045432	113755556	trans
lnc-RB1-2	CHMP4B	chr20	32399110	32442172	Up	chr13	49106975	49107897	Antisense	Up	48806975	49407897	trans
lnc-RCAN3-1	CHMP4B	chr20	32399110	32442172	Up	chr1	24865206	24865735	Intergenic	Up	24565206	25165735	trans
lnc-RHBDF1-1	RER1	chr1	2323267	2336883	Up	chr16	129422	130119	Antisense	Up	-170578	430119	trans
lnc-RHOQ-1	ANK2	chr4	113739265	114304896	Down	chr2	46768944	46803388	Sense	Up	46468944	47103388	trans
lnc-RHOQ-1	CHMP4B	chr20	32399110	32442172	Up	chr2	46768944	46803388	Sense	Up	46468944	47103388	trans
lnc-RHOQ-2	CHMP4B	chr20	32399110	32442172	Up	chr2	46762834	46768609	Intergenic	Up	46462834	47068609	trans
lnc-RIC8A-1	RER1	chr1	2323267	2336883	Up	chr11	203622	205470	Intron	Up	-96378	505470	trans
lnc-RIMBP3C-3	SGTB	NA	NA	NA	NA	chr22	21803800	21805329	Antisense	Up	21503800	22105329	trans
lnc-RIMS3-2	CHMP4B	chr20	32399110	32442172	Up	chr1	40981425	40982846	Antisense	Up	40681425	41282846	trans
lnc-RIMS3-3	CHMP4B	chr20	32399110	32442172	Up	chr1	40980132	40980729	Antisense	Up	40680132	41280729	trans
lnc-RNF125-2	RER1	chr1	2323267	2336883	Up	chr18	29522537	29524119	Antisense	Up	29222537	29824119	trans
lnc-RNF146-2	ANK2	chr4	113739265	114304896	Down	chr6	127651906	127653253	Antisense	Up	127351906	127953253	trans
lnc-RNF146-2	CHMP4B	chr20	32399110	32442172	Up	chr6	127651906	127653253	Antisense	Up	127351906	127953253	trans
lnc-RNF149-2	CHMP4B	chr20	32399110	32442172	Up	chr2	101635003	101637620	Intron	Up	101335003	101937620	trans
lnc-RNF40-1	RER1	chr1	2323267	2336883	Up	chr16	30789769	30791473	Antisense	Up	30489769	31091473	trans
lnc-RP1-286D6.2.1-2	RER1	chr1	2323267	2336883	Up	chr1	3701571	3702102	Antisense	Up	3401571	4002102	trans
lnc-RP11-116D17.1.1-10	ANK2	chr4	113739265	114304896	Down	chr12	116398991	116400538	Intron	Up	116098991	116700538	trans
lnc-RP11-116D17.1.1-10	CHMP4B	chr20	32399110	32442172	Up	chr12	116398991	116400538	Intron	Up	116098991	116700538	trans
lnc-RP11-324D17.2.1-3	ANK2	chr4	113739265	114304896	Down	chr16	54033348	54048240	Intron	Down	53733348	54348240	trans
lnc-RP11-324D17.2.1-3	CHMP4B	chr20	32399110	32442172	Up	chr16	54033348	54048240	Intron	Down	53733348	54348240	trans
lnc-RP11-712L6.5.1-3	CHMP4B	chr20	32399110	32442172	Up	chr11	126164201	126167021	Antisense	Up	125864201	126467021	trans
lnc-RP11-930P14.1.1-1	SGTB	NA	NA	NA	NA	chr8	41518508	41523176	Intergenic	Up	41218508	41823176	trans
lnc-RP3-377D14.1.1-7	RYR2	chr1	237205505	237997288	Down	chr1	142618768	143257763	Antisense	Down	142318768	143557763	trans
lnc-RPS24-8	CHMP4B	chr20	32399110	32442172	Up	chr10	79782359	79785863	Antisense	Up	79482359	80085863	trans
lnc-RPS27L-1	CHMP4B	chr20	32399110	32442172	Up	chr15	63362223	63364110	Antisense	Up	63062223	63664110	trans
lnc-RRP8-1	RER1	chr1	2323267	2336883	Up	chr11	6624871	6625650	Sense	Up	6324871	6925650	trans
lnc-RUNDC3A-1	SPCS3	NA	NA	NA	NA	chr17	42396995	42397584	Antisense	Up	42096995	42697584	trans
lnc-SAFB-1	RER1	chr1	2323267	2336883	Up	chr19	5558184	5581226	Antisense	Up	5258184	5881226	trans
lnc-SAR1B-1	CHMP4B	chr20	32399110	32442172	Up	chr5	134061116	134063509	Antisense	Up	133761116	134363509	trans
lnc-SCAND1-5	RER1	chr1	2323267	2336883	Up	chr20	34816084	34820716	Antisense	Up	34516084	35120716	trans
lnc-SEC22C-2	ANK2	chr4	113739265	114304896	Down	chr3	42643454	42695880	Sense	Up	42343454	42995880	trans
lnc-SEC22C-2	CHMP4B	chr20	32399110	32442172	Up	chr3	42643454	42695880	Sense	Up	42343454	42995880	trans
lnc-SEMA4B-2	RER1	chr1	2323267	2336883	Up	chr15	90617747	90621641	Intergenic	Up	90317747	90921641	trans
lnc-SEPT14-2	CHMP4B	chr20	32399110	32442172	Up	chr7	55840869	55841546	Intergenic	Up	55540869	56141546	trans
lnc-SERHL2-7	ANK2	chr4	113739265	114304896	Down	chr22	43217870	43219332	Antisense	Up	42917870	43519332	trans
lnc-SERHL2-7	CHMP4B	chr20	32399110	32442172	Up	chr22	43217870	43219332	Antisense	Up	42917870	43519332	trans
lnc-SERPINE2-1	CHMP4B	chr20	32399110	32442172	Up	chr2	224830417	224832423	Antisense	Up	224530417	225132423	trans
lnc-SETD6-1	RER1	chr1	2323267	2336883	Up	chr16	58767815	59142878	Antisense	Up	58467815	59442878	trans
lnc-SGTB-2	RER1	chr1	2323267	2336883	Up	chr5	65439983	65440623	Antisense	Up	65139983	65740623	trans
lnc-SH2D7-3	CHMP4B	chr20	32399110	32442172	Up	chr15	78285746	78287631	Antisense	Up	77985746	78587631	trans
lnc-SH3RF1-2	CHMP4B	chr20	32399110	32442172	Up	chr4	169784943	169927939	Sense	Up	169484943	170227939	trans
lnc-SKA2-2	CHMP4B	chr20	32399110	32442172	Up	chr17	57477848	57480664	Intergenic	Up	57177848	57780664	trans
lnc-SKIV2L2-1	CHMP4B	chr20	32399110	32442172	Up	chr5	54529761	54591029	Antisense	Up	54229761	54891029	trans
lnc-SLC16A6-2	CHMP4B	chr20	32399110	32442172	Up	chr17	66124480	66143664	Antisense	Up	65824480	66443664	trans
lnc-SLC22A18-1	RER1	chr1	2323267	2336883	Up	chr11	2965667	2966753	Antisense	Up	2665667	3266753	trans
lnc-SLC24A5-5	CHMP4B	chr20	32399110	32442172	Up	chr15	48443339	48443970	Antisense	Up	48143339	48743970	trans
lnc-SLC36A1-5	SRP9	chr1	225965531	225978168	Up	chr5	151186315	151190915	Intergenic	Up	150886315	151490915	trans
lnc-SLC39A6-1	CHMP4B	chr20	32399110	32442172	Up	chr18	33759552	33767411	Intergenic	Up	33459552	34067411	trans
lnc-SLC3A2-1	SPCS3	NA	NA	NA	NA	chr11	62599705	62601515	Antisense	Up	62299705	62901515	trans
lnc-SLC4A10-2	SPCS3	NA	NA	NA	NA	chr2	162929765	162931679	Antisense	Up	162629765	163231679	trans
lnc-SLC7A6OS-2	SPCS3	NA	NA	NA	NA	chr16	68259871	68263048	Sense	Up	67959871	68563048	trans
lnc-SLCO2B1-2	RER1	chr1	2323267	2336883	Up	chr11	74971170	74972069	Antisense	Up	74671170	75272069	trans
lnc-SLTM-1	CHMP4B	chr20	32399110	32442172	Up	chr15	59149029	59157262	Antisense	Up	58849029	59457262	trans
lnc-SMARCC2-4	SGTB	NA	NA	NA	NA	chr12	56512751	56513723	Antisense	Up	56212751	56813723	trans
lnc-SMARCC2-5	ANK2	chr4	113739265	114304896	Down	chr12	56498397	56507689	Antisense	Up	56198397	56807689	trans
lnc-SPATA9-1	RER1	chr1	2323267	2336883	Up	chr5	95036952	95067999	Antisense	Up	94736952	95367999	trans
lnc-SPATC1-1	SPCS3	NA	NA	NA	NA	chr8	145104457	145106423	Antisense	Up	144804457	145406423	trans
lnc-SPERT-4	CHMP4B	chr20	32399110	32442172	Up	chr13	46530610	46533781	Intergenic	Up	46230610	46833781	trans
lnc-SPIN3-5	SRP9	chr1	225965531	225978168	Up	chrX	56311187	56312246	Antisense	Up	56011187	56612246	trans
lnc-SPTBN5-2	CHMP4B	chr20	32399110	32442172	Up	chr15	42062137	42065278	Intergenic	Up	41762137	42365278	trans
lnc-ST3GAL1-1	CHMP4B	chr20	32399110	32442172	Up	chr8	134374741	134421713	Intergenic	Up	134074741	134721713	trans
lnc-STAT1-1	CHMP4B	chr20	32399110	32442172	Up	chr2	191798137	191800014	Intron	Up	191498137	192100014	trans
lnc-SUSD1-1	CHMP4B	chr20	32399110	32442172	Up	chr9	114794834	114800010	Intron	Down	114494834	115100010	trans
lnc-SVIL-3	RER1	chr1	2323267	2336883	Up	chr10	29710567	29711301	Intron	Up	29410567	30011301	trans
lnc-TAF1A-1	CHMP4B	chr20	32399110	32442172	Up	chr1	222763364	222765741	Antisense	Up	222463364	223065741	trans
lnc-TBPL1-3	SGTB	NA	NA	NA	NA	chr6	134309209	134311566	Intron	Up	134009209	134611566	trans
lnc-TBXAS1-4	RER1	chr1	2323267	2336883	Up	chr7	139723547	139724022	Antisense	Up	139423547	140024022	trans
lnc-TCHP-1	SEC61A2	chr10	12171636	12211960	Up	chr12	110367649	110421646	Antisense	Up	110067649	110721646	trans
lnc-TCIRG1-1	RER1	chr1	2323267	2336883	Up	chr11	67819099	67821229	Antisense	Up	67519099	68121229	trans
lnc-TCP1-2	CHMP4B	chr20	32399110	32442172	Up	chr6	160146542	160148128	Antisense	Up	159846542	160448128	trans
lnc-TCTEX1D1-1	SEC61A1	chr3	127770484	127790526	Up	chr1	67292624	67294241	Antisense	Up	66992624	67594241	trans
lnc-TCTEX1D1-1	SEC62	chr3	169684423	169716161	Up	chr1	67292624	67294241	Antisense	Up	66992624	67594241	trans
lnc-TCTEX1D1-1	SRP19	chr5	112196919	112205485	Up	chr1	67292624	67294241	Antisense	Up	66992624	67594241	trans
lnc-TESC-4	CHMP4B	chr20	32399110	32442172	Up	chr12	117468113	117468878	Intergenic	Up	117168113	117768878	trans
lnc-THRSP-2	CHMP4B	chr20	32399110	32442172	Up	chr11	77726760	77727541	Antisense	Up	77426760	78027541	trans
lnc-THYN1-1	RER1	chr1	2323267	2336883	Up	chr11	134130071	134145463	Antisense	Up	133830071	134445463	trans
lnc-TICAM1-1	ANK2	chr4	113739265	114304896	Down	chr19	4794993	4795571	Antisense	Up	4494993	5095571	trans
lnc-TICAM1-1	CHMP4B	chr20	32399110	32442172	Up	chr19	4794993	4795571	Antisense	Up	4494993	5095571	trans
lnc-TIGD1L2-6	CHMP4B	chr20	32399110	32442172	Up	chr9	32541770	32543014	Intron	Up	32241770	32843014	trans
lnc-TM2D2-1	SEC61A2	chr10	12171636	12211960	Up	chr8	38827878	38830530	Antisense	Up	38527878	39130530	trans
lnc-TMBIM1-3	RER1	chr1	2323267	2336883	Up	chr2	219209579	219209849	Intergenic	Up	218909579	219509849	trans
lnc-TMEM123-1	CHMP4B	chr20	32399110	32442172	Up	chr11	102100581	102101653	Antisense	Up	101800581	102401653	trans
lnc-TMEM138-4	CHMP4B	chr20	32399110	32442172	Up	chr11	61114589	61116612	Sense	Up	60814589	61416612	trans
lnc-TMEM147-1	CHMP4B	chr20	32399110	32442172	Up	chr19	36031640	36032480	Antisense	Up	35731640	36332480	trans
lnc-TMEM164-2	CHMP4B	chr20	32399110	32442172	Up	chrX	109437413	109438732	Antisense	Up	109137413	109738732	trans
lnc-TMEM186-1	RER1	chr1	2323267	2336883	Up	chr16	8873632	8891499	Antisense	Up	8573632	9191499	trans
lnc-TMEM240-1	SEC61A1	chr3	127770484	127790526	Up	chr1	1497725	1499904	Intron	Up	1197725	1799904	trans
lnc-TMEM240-1	SEC62	chr3	169684423	169716161	Up	chr1	1497725	1499904	Intron	Up	1197725	1799904	trans
lnc-TMEM240-1	SRP19	chr5	112196919	112205485	Up	chr1	1497725	1499904	Intron	Up	1197725	1799904	trans
lnc-TMEM43-1	RER1	chr1	2323267	2336883	Up	chr3	14186222	14189784	Antisense	Up	13886222	14489784	trans
lnc-TMEM75-8	CHMP4B	chr20	32399110	32442172	Up	chr8	128767771	128815392	Antisense	Down	128467771	129115392	trans
lnc-TMEM98-2	SPCS3	NA	NA	NA	NA	chr17	31203776	31233602	Antisense	Up	30903776	31533602	trans
lnc-TMSB15A-3	SGTB	NA	NA	NA	NA	chrX	101860008	101862247	Intergenic	Up	101560008	102162247	trans
lnc-TMUB2-2	RER1	chr1	2323267	2336883	Up	chr17	42269165	42271337	Antisense	Up	41969165	42571337	trans
lnc-TNFRSF11B-2	CHMP4B	chr20	32399110	32442172	Up	chr8	120227350	120259088	Antisense	Up	119927350	120559088	trans
lnc-TOMM20L-1	CHMP4B	chr20	32399110	32442172	Up	chr14	58865274	58893843	Sense	Up	58565274	59193843	trans
lnc-TOR3A-1	SEC61A2	chr10	12171636	12211960	Up	chr1	179070797	179074885	Intron	Up	178770797	179374885	trans
lnc-TOX4-1	SGTB	NA	NA	NA	NA	chr14	21989233	21990794	Antisense	Up	21689233	22290794	trans
lnc-TRAP1-1	SGTB	NA	NA	NA	NA	chr16	3700636	3701704	Intergenic	Up	3400636	4001704	trans
lnc-TRIM6-TRIM34-1	SPCS3	NA	NA	NA	NA	chr11	5664411	5687610	Antisense	Up	5364411	5987610	trans
lnc-TRNT1-1	CHMP4B	chr20	32399110	32442172	Up	chr3	3194625	3195119	Antisense	Up	2894625	3495119	trans
lnc-TRRAP-1	RER1	chr1	2323267	2336883	Up	chr7	98627848	98645710	Antisense	Up	98327848	98945710	trans
lnc-TSC2-2	SEC61G	NA	NA	NA	NA	chr16	2162335	2163343	Antisense	Up	1862335	2463343	trans
lnc-TTC26-4	CHMP4B	chr20	32399110	32442172	Up	chr7	138708092	138708856	Intergenic	Up	138408092	139008856	trans
lnc-TTYH3-2	RER1	chr1	2323267	2336883	Up	chr7	2762817	2764609	Intergenic	Up	2462817	3064609	trans
lnc-TUFM-1	SPCS1	chr3	52738971	52742182	Up	chr16	28841932	28848521	Antisense	Up	28541932	29148521	trans
lnc-TYMS-1	RER1	chr1	2323267	2336883	Up	chr18	696224	698160	Antisense	Up	396224	998160	trans
lnc-UBAP1-5	RER1	chr1	2323267	2336883	Up	chr9	34107126	34107655	Antisense	Up	33807126	34407655	trans
lnc-UBE2B-1	CHMP4B	chr20	32399110	32442172	Up	chr5	133735185	133737612	Intergenic	Up	133435185	134037612	trans
lnc-UBE2Z-1	RER1	chr1	2323267	2336883	Up	chr17	47009152	47014462	Antisense	Up	46709152	47314462	trans
lnc-UCK1-3	RER1	chr1	2323267	2336883	Up	chr9	134374795	134375537	Intergenic	Up	134074795	134675537	trans
lnc-UGP2-4	CHMP4B	chr20	32399110	32442172	Up	chr2	64309105	64333464	Antisense	Up	64009105	64633464	trans
lnc-USP50-1	CHMP4B	chr20	32399110	32442172	Up	chr15	50789391	50790941	Antisense	Up	50489391	51090941	trans
lnc-USP50-2	CHMP4B	chr20	32399110	32442172	Up	chr15	50786214	50789277	Antisense	Up	50486214	51089277	trans
lnc-VAT1-1	RER1	chr1	2323267	2336883	Up	chr17	41164797	41167836	Sense	Up	40864797	41467836	trans
lnc-VN1R2-9	RER1	chr1	2323267	2336883	Up	chr19	53569944	53613152	Antisense	Up	53269944	53913152	trans
lnc-VRK3-2	CHMP4B	chr20	32399110	32442172	Up	chr19	50546574	50554292	Antisense	Up	50246574	50854292	trans
lnc-WDR41-1	ANK2	chr4	113739265	114304896	Down	chr5	76721794	76728984	Sense	Up	76421794	77028984	trans
lnc-WDR41-1	CHMP4B	chr20	32399110	32442172	Up	chr5	76721794	76728984	Sense	Up	76421794	77028984	trans
lnc-WDR45L-1	CHMP4B	chr20	32399110	32442172	Up	chr17	80560864	80562401	Antisense	Up	80260864	80862401	trans
lnc-WDR73-7	SPCS3	NA	NA	NA	NA	chr15	85177460	85197472	Sense	Up	84877460	85497472	trans
lnc-WDR77-2	SRP9	chr1	225965531	225978168	Up	chr1	112004683	112012086	Intergenic	Up	111704683	112312086	trans
lnc-WDR86-2	CHMP4B	chr20	32399110	32442172	Up	chr7	151062455	151065689	Antisense	Up	150762455	151365689	trans
lnc-WRNIP1-3	CHMP4B	chr20	32399110	32442172	Up	chr6	2244110	2245808	Antisense	Up	1944110	2545808	trans
lnc-ZBTB37-2	RER1	chr1	2323267	2336883	Up	chr1	173834366	173835344	Antisense	Up	173534366	174135344	trans
lnc-ZNF146-1	SPCS1	chr3	52738971	52742182	Up	chr19	36795481	36812260	Sense	Up	36495481	37112260	trans
lnc-ZNF213-2	SPCS3	NA	NA	NA	NA	chr16	3175529	3184830	Antisense	Up	2875529	3484830	trans
lnc-ZNF235-2	SRP9	chr1	225965531	225978168	Up	chr19	44660661	44682394	Antisense	Up	44360661	44982394	trans
lnc-ZNF394-1	ANK2	chr4	113739265	114304896	Down	chr7	99084141	99097947	Sense	Up	98784141	99397947	trans
lnc-ZNF394-1	CHMP4B	chr20	32399110	32442172	Up	chr7	99084141	99097947	Sense	Up	98784141	99397947	trans
lnc-ZNF45-2	CHMP4B	chr20	32399110	32442172	Up	chr19	44501047	44507022	Sense	Up	44201047	44807022	trans
lnc-ZNF506-2	SEC61A2	chr10	12171636	12211960	Up	chr19	19945685	20008579	Antisense	Up	19645685	20308579	trans
lnc-ZNF599-3	SGTB	NA	NA	NA	NA	chr19	35339892	35351480	Intergenic	Up	35039892	35651480	trans
lnc-ZNF680-14	SGTB	NA	NA	NA	NA	chr7	64139331	64147771	Antisense	Up	63839331	64447771	trans
lnc-ZNF738-5	SEC61A2	chr10	12171636	12211960	Up	chr19	21458356	21477566	Antisense	Up	21158356	21777566	trans
lnc-ZNF775-1	CHMP4B	chr20	32399110	32442172	Up	chr7	150076417	150109558	Sense	Up	149776417	150409558	trans
lnc-ZNF83-6	SEC61A2	chr10	12171636	12211960	Up	chr19	53057603	53064515	Antisense	Up	52757603	53364515	trans
lnc-ZSCAN2-5	RER1	chr1	2323267	2336883	Up	chr15	85175193	85186244	Sense	Up	84875193	85486244	trans
LYPLAL1-AS1	ANK2	chr4	113739265	114304896	Down	chr1	219254316	219347303	Sense	Up	218954316	219647303	trans
LYPLAL1-AS1	CHMP4B	chr20	32399110	32442172	Up	chr1	219254316	219347303	Sense	Up	218954316	219647303	trans
MEF2C-AS1	ANK2	chr4	113739265	114304896	Down	chr5	88179144	88797268	Sense	Down	87879144	89097268	trans
MORC2-AS1	RER1	chr1	2323267	2336883	Up	chr22	31318315	31328436	Sense	Up	31018315	31628436	trans
NAPA-AS1	RER1	chr1	2323267	2336883	Up	chr19	47987538	48004854	Sense	Up	47687538	48304854	trans
OIP5-AS1	SEC62	chr3	169684423	169716161	Up	chr15	41576218	41598729	Sense	Up	41276218	41898729	trans
PITPNA-AS1	ANK2	chr4	113739265	114304896	Down	chr17	1420212	1423855	Sense	Up	1120212	1723855	trans
PLA2G4C-AS1	CHMP4B	chr20	32399110	32442172	Up	chr19	48564694	48565479	Antisense	Up	48264694	48865479	trans
POTEH-AS1	ANK2	chr4	113739265	114304896	Down	chr22	16274559	16278602	Sense	Up	15974559	16578602	trans
POTEH-AS1	CHMP4B	chr20	32399110	32442172	Up	chr22	16274559	16278602	Sense	Up	15974559	16578602	trans
PRKAR2A-AS1	RER1	chr1	2323267	2336883	Up	chr3	48885004	48893739	Sense	Up	48585004	49193739	trans
PTOV1-AS2	RER1	chr1	2323267	2336883	Up	chr19	50356143	50362546	Sense	Up	50056143	50662546	trans
RUSC1-AS1	RER1	chr1	2323267	2336883	Up	chr1	155287223	155293959	Sense	Up	154987223	155593959	trans
SOX2-OT	RER1	chr1	2323267	2336883	Up	chr3	180707023	181554668	Sense	Up	180407023	181854668	trans
STARD4-AS1	SEC61A2	chr10	12171636	12211960	Up	chr5	110847923	111075423	Antisense	Up	110547923	111375423	trans
TAB3-AS2	CHMP4B	chr20	32399110	32442172	Up	chrX	30872437	30872824	Intron	Up	30572437	31172824	trans
TMEM246-AS1	SGTB	NA	NA	NA	NA	chr9	104230720	104244538	Sense	Up	103930720	104544538	trans
TSC22D1-AS1	SPCS3	NA	NA	NA	NA	chr13	45150031	45154568	Sense	Up	44850031	45454568	trans
UBXN7-AS1	ANK2	chr4	113739265	114304896	Down	chr3	196158255	196159401	Antisense	Up	195858255	196459401	trans
UBXN7-AS1	CHMP4B	chr20	32399110	32442172	Up	chr3	196158255	196159401	Antisense	Up	195858255	196459401	trans
XLOC_000108	ANK2	chr4	113739265	114304896	Down	chr1	2284156	2302320	Intron	Up	1984156	2602320	trans
XLOC_1015575	RER1	chr1	2323267	2336883	Up	chr17	79841951	79843974	Intergenic	Up	79541951	80143974	trans
XLOC_1093604	CHMP4B	chr20	32399110	32442172	Up	chr18	24268191	24269456	Intron	Up	23968191	24569456	trans
XLOC_1093926	CHMP4B	chr20	32399110	32442172	Up	chr18	56718957	56719257	Intron	Up	56418957	57019257	trans
XLOC_1174702	CHMP4B	chr20	32399110	32442172	Up	chr19	20350223	20350573	Intergenic	Up	20050223	20650573	trans
XLOC_1174717	CHMP4B	chr20	32399110	32442172	Up	chr19	20804625	20825905	Intron	Up	20504625	21125905	trans
XLOC_1176816	RER1	chr1	2323267	2336883	Up	chr19	16895468	16928342	Antisense	Up	16595468	17228342	trans
XLOC_1177405	ANK2	chr4	113739265	114304896	Down	chr19	41256244	41257435	Antisense	Up	40956244	41557435	trans
XLOC_1177405	CHMP4B	chr20	32399110	32442172	Up	chr19	41256244	41257435	Antisense	Up	40956244	41557435	trans
XLOC_1230118	CHMP4B	chr20	32399110	32442172	Up	chr2	27289857	27290357	Intron	Up	26989857	27590357	trans
XLOC_1230520	CHMP4B	chr20	32399110	32442172	Up	chr2	55775382	55775873	Intron	Up	55475382	56075873	trans
XLOC_1231971	SPCS1	chr3	52738971	52742182	Up	chr2	162930025	162933808	Antisense	Up	162630025	163233808	trans
XLOC_1232513	SGTB	NA	NA	NA	NA	chr2	206987229	206987728	Intergenic	Up	206687229	207287728	trans
XLOC_1233095	ANK2	chr4	113739265	114304896	Down	chr2	241940234	242032006	Antisense	Up	241640234	242332006	trans
XLOC_1482847	CHMP4B	chr20	32399110	32442172	Up	chr20	3184149	3184886	Intron	Up	2884149	3484886	trans
XLOC_1483332	CHMP4B	chr20	32399110	32442172	Up	chr20	35407641	35408687	Intron	Up	35107641	35708687	trans
XLOC_1585364	RER1	chr1	2323267	2336883	Up	chr22	43253087	43267359	Antisense	Up	42953087	43567359	trans
XLOC_1622484	CHMP4B	chr20	32399110	32442172	Up	chr3	131753200	131791654	Intergenic	Up	131453200	132091654	trans
XLOC_1623391	CHMP4B	chr20	32399110	32442172	Up	chr3	197234113	197235317	Intergenic	Up	196934113	197535317	trans
XLOC_1625085	ANK2	chr4	113739265	114304896	Down	chr3	141163405	141174121	Antisense	Up	140863405	141474121	trans
XLOC_1625085	CHMP4B	chr20	32399110	32442172	Up	chr3	141163405	141174121	Antisense	Up	140863405	141474121	trans
XLOC_1625271	CHMP4B	chr20	32399110	32442172	Up	chr3	155656185	155657811	Intergenic	Up	155356185	155957811	trans
XLOC_1828250	RER1	chr1	2323267	2336883	Up	chr4	8359155	8362287	Intergenic	Up	8059155	8662287	trans
XLOC_1831791	ANK2	chr4	113739265	114304896	Down	chr4	156589821	156595833	Intron	Up	156289821	156895833	trans
XLOC_1831791	CHMP4B	chr20	32399110	32442172	Up	chr4	156589821	156595833	Intron	Up	156289821	156895833	trans
XLOC_2029264	SPCS3	NA	NA	NA	NA	chr5	54565415	54566493	Antisense	Up	54265415	54866493	trans
XLOC_2217833	CHMP4B	chr20	32399110	32442172	Up	chr6	58146711	58171923	Intergenic	Up	57846711	58471923	trans
XLOC_2218192	CHMP4B	chr20	32399110	32442172	Up	chr6	99996183	99998233	Antisense	Up	99696183	100298233	trans
XLOC_235741	SGTB	NA	NA	NA	NA	chr10	52382515	52389539	Intron	Up	52082515	52689539	trans
XLOC_236009	SEC62	chr3	169684423	169716161	Up	chr10	75007669	75011429	Sense	Up	74707669	75311429	trans
XLOC_2393438	SEC61G	NA	NA	NA	NA	chr7	32954152	32954482	Intergenic	Up	32654152	33254482	trans
XLOC_2393515	ANK2	chr4	113739265	114304896	Down	chr7	38355814	38356243	Intergenic	Up	38055814	38656243	trans
XLOC_2393515	CHMP4B	chr20	32399110	32442172	Up	chr7	38355814	38356243	Intergenic	Up	38055814	38656243	trans
XLOC_2394941	CHMP4B	chr20	32399110	32442172	Up	chr7	140420124	140420684	Intergenic	Up	140120124	140720684	trans
XLOC_2395743	CHMP4B	chr20	32399110	32442172	Up	chr7	27232664	27241302	Sense	Up	26932664	27541302	trans
XLOC_2714543	SGTB	NA	NA	NA	NA	chr9	136283382	136283796	Intron	Up	135983382	136583796	trans
XLOC_2839044	ANK2	chr4	113739265	114304896	Down	chrX	61718374	61722763	Intergenic	Down	61418374	62022763	trans
XLOC_2839044	CHMP4B	chr20	32399110	32442172	Up	chrX	61718374	61722763	Intergenic	Down	61418374	62022763	trans
XLOC_2840602	ANK2	chr4	113739265	114304896	Down	chrX	58563841	58580996	Intergenic	Down	58263841	58880996	trans
XLOC_375824	CHMP4B	chr20	32399110	32442172	Up	chr11	58817436	58861559	Intergenic	Up	58517436	59161559	trans
XLOC_376899	CHMP4B	chr20	32399110	32442172	Up	chr11	116645341	116645982	Intergenic	Up	116345341	116945982	trans
XLOC_514233	CHMP4B	chr20	32399110	32442172	Up	chr12	53432901	53435908	Sense	Up	53132901	53735908	trans
XLOC_515249	ANK2	chr4	113739265	114304896	Down	chr12	117580681	117581435	Intergenic	Up	117280681	117881435	trans
XLOC_515249	CHMP4B	chr20	32399110	32442172	Up	chr12	117580681	117581435	Intergenic	Up	117280681	117881435	trans
XLOC_516577	RER1	chr1	2323267	2336883	Up	chr12	56386689	56386950	Antisense	Up	56086689	56686950	trans
XLOC_845645	CHMP4B	chr20	32399110	32442172	Up	chr15	45777911	45778155	Intron	Up	45477911	46078155	trans
XLOC_845984	RYR2	chr1	237205505	237997288	Down	chr15	68484068	68485910	Intron	Up	68184068	68785910	trans
XLOC_846292	RER1	chr1	2323267	2336883	Up	chr15	83504067	83505505	Intergenic	Up	83204067	83805505	trans
XLOC_846295	RER1	chr1	2323267	2336883	Up	chr15	83511282	83524036	Antisense	Up	83211282	83824036	trans
XLOC_847185	CHMP4B	chr20	32399110	32442172	Up	chr15	45965885	45967436	Antisense	Up	45665885	46267436	trans
XLOC_931187	SPCS1	chr3	52738971	52742182	Up	chr16	18937523	18948351	Antisense	Up	18637523	19248351	trans
XLOC_932037	RER1	chr1	2323267	2336883	Up	chr16	69153526	69153872	Intron	Up	68853526	69453872	trans
XLOC_932070	ANK2	chr4	113739265	114304896	Down	chr16	70282335	70291269	Antisense	Up	69982335	70591269	trans
XLOC_933800	SGTB	NA	NA	NA	NA	chr16	69117747	69121207	Antisense	Up	68817747	69421207	trans
ZNF571-AS1	SEC61A2	chr10	12171636	12211960	Up	chr19	38037567	38078249	Sense	Up	37737567	38378249	trans
