# Supplementary material for: LncRNAs induce oxidative stress and spermatogenesis by regulating endoplasmic reticulum genes and pathways
Source: Aging (Albany NY). 2021 May 6;13(10):13764–87. doi: 10.18632/aging.202971 (PMC8202879; doi:10.18632/aging.202971)
Supplement: Supplementary Table 16 [file aging-13-202971-s016.csv]

Supplementary Table 16. cis_trans_ER.
lncrna	mrna	chr_mrna	start_mrna	end_mrna	diff_mrna	chr_lncrna	start_lncrna	end_lncrna	sub_lncrna	diff_lncrna	uplim	downlim	regulation
EVX1-AS	ATF5	chr19	50431959	50437192	Up	chr7	27278861	27286848	Sense	Up	26978861	27586848	trans
EVX1-AS	CEBPZ	chr2	37428755	37458856	Up	chr7	27278861	27286848	Sense	Up	26978861	27586848	trans
EVX1-AS	EIF2A	chr3	150264465	150302029	Up	chr7	27278861	27286848	Sense	Up	26978861	27586848	trans
FOXP1-AS1	MCL1	chr1	150547032	150552066	Up	chr3	71338907	71359918	Antisense	Up	71038907	71659918	trans
GRTP1-AS1	ATF5	chr19	50431959	50437192	Up	chr13	113962828	114016183	Sense	Up	113662828	114316183	trans
GRTP1-AS1	CEBPZ	chr2	37428755	37458856	Up	chr13	113962828	114016183	Sense	Up	113662828	114316183	trans
IDH1-AS1	ATF5	chr19	50431959	50437192	Up	chr2	209119956	209120918	Sense	Up	208819956	209420918	trans
IDH1-AS1	CEBPZ	chr2	37428755	37458856	Up	chr2	209119956	209120918	Sense	Up	208819956	209420918	trans
IDH1-AS1	EIF2A	chr3	150264465	150302029	Up	chr2	209119956	209120918	Sense	Up	208819956	209420918	trans
LINC00526	EIF2AK1	chr7	6061881	6098861	Up	chr18	5232874	5238597	Sense	Up	4932874	5538597	trans
LINC00959	EIF2AK1	chr7	6061881	6098861	Up	chr10	131857147	131909092	Sense	Down	131557147	132209092	trans
lnc-AC002553.1-1	ATF5	chr19	50431959	50437192	Up	chr17	15943785	15944587	Antisense	Up	15643785	16244587	trans
lnc-AC002553.1-1	CEBPZ	chr2	37428755	37458856	Up	chr17	15943785	15944587	Antisense	Up	15643785	16244587	trans
lnc-AC002553.1-1	EIF2A	chr3	150264465	150302029	Up	chr17	15943785	15944587	Antisense	Up	15643785	16244587	trans
lnc-AC006050.2.1-6	ATF5	chr19	50431959	50437192	Up	chr17	28934569	28935580	Antisense	Up	28634569	29235580	trans
lnc-AC006050.2.1-6	CEBPZ	chr2	37428755	37458856	Up	chr17	28934569	28935580	Antisense	Up	28634569	29235580	trans
lnc-AC006050.2.1-6	EIF2A	chr3	150264465	150302029	Up	chr17	28934569	28935580	Antisense	Up	28634569	29235580	trans
lnc-AC008073.6.1-2	EIF2A	chr3	150264465	150302029	Up	chr2	24298886	24392507	Sense	Up	23998886	24692507	trans
lnc-AC010336.2-1	ATF5	chr19	50431959	50437192	Up	chr19	7971110	7974758	Antisense	Up	7671110	8274758	trans
lnc-AC018816.3.1-11	ATF5	chr19	50431959	50437192	Up	chr3	4725382	4752120	Antisense	Up	4425382	5052120	trans
lnc-AC018816.3.1-11	CEBPZ	chr2	37428755	37458856	Up	chr3	4725382	4752120	Antisense	Up	4425382	5052120	trans
lnc-AC018816.3.1-11	EIF2A	chr3	150264465	150302029	Up	chr3	4725382	4752120	Antisense	Up	4425382	5052120	trans
lnc-AC079341.1-10	ATF5	chr19	50431959	50437192	Up	chr4	121843096	121844760	Antisense	Up	121543096	122144760	trans
lnc-AC079341.1-10	CEBPZ	chr2	37428755	37458856	Up	chr4	121843096	121844760	Antisense	Up	121543096	122144760	trans
lnc-AC079341.1-10	EIF2A	chr3	150264465	150302029	Up	chr4	121843096	121844760	Antisense	Up	121543096	122144760	trans
lnc-AC127496.3-7	ATF5	chr19	50431959	50437192	Up	chr17	78914217	78915833	Intergenic	Up	78614217	79215833	trans
lnc-AC127496.3-7	CEBPZ	chr2	37428755	37458856	Up	chr17	78914217	78915833	Intergenic	Up	78614217	79215833	trans
lnc-AC127496.3-7	EIF2A	chr3	150264465	150302029	Up	chr17	78914217	78915833	Intergenic	Up	78614217	79215833	trans
lnc-ADAM21-4	MCL1	chr1	150547032	150552066	Up	chr14	70830398	70834616	Intron	Up	70530398	71134616	trans
lnc-AGMAT-4	ATF5	chr19	50431959	50437192	Up	chr1	15892105	15892451	Antisense	Up	15592105	16192451	trans
lnc-AGMAT-4	CEBPZ	chr2	37428755	37458856	Up	chr1	15892105	15892451	Antisense	Up	15592105	16192451	trans
lnc-AGMAT-4	EIF2A	chr3	150264465	150302029	Up	chr1	15892105	15892451	Antisense	Up	15592105	16192451	trans
lnc-ALX4-5	ATF5	chr19	50431959	50437192	Up	chr11	43851258	43902276	Antisense	Up	43551258	44202276	trans
lnc-ALX4-5	CEBPZ	chr2	37428755	37458856	Up	chr11	43851258	43902276	Antisense	Up	43551258	44202276	trans
lnc-ALX4-5	EIF2A	chr3	150264465	150302029	Up	chr11	43851258	43902276	Antisense	Up	43551258	44202276	trans
lnc-AMDHD1-2	ATF5	chr19	50431959	50437192	Up	chr12	96419100	96421749	Antisense	Up	96119100	96721749	trans
lnc-AMDHD1-2	CEBPZ	chr2	37428755	37458856	Up	chr12	96419100	96421749	Antisense	Up	96119100	96721749	trans
lnc-AMDHD1-3	ATF5	chr19	50431959	50437192	Up	chr12	96429136	96441430	Antisense	Up	96129136	96741430	trans
lnc-AMDHD1-3	CEBPZ	chr2	37428755	37458856	Up	chr12	96429136	96441430	Antisense	Up	96129136	96741430	trans
lnc-AMDHD1-3	EIF2A	chr3	150264465	150302029	Up	chr12	96429136	96441430	Antisense	Up	96129136	96741430	trans
lnc-AMN-3	EIF2AK1	chr7	6061881	6098861	Up	chr14	103474076	103475968	Antisense	Up	103174076	103775968	trans
lnc-ANKMY2-1	ATF5	chr19	50431959	50437192	Up	chr7	16735495	16759523	Antisense	Up	16435495	17059523	trans
lnc-ANKMY2-1	CEBPZ	chr2	37428755	37458856	Up	chr7	16735495	16759523	Antisense	Up	16435495	17059523	trans
lnc-ANKMY2-1	EIF2A	chr3	150264465	150302029	Up	chr7	16735495	16759523	Antisense	Up	16435495	17059523	trans
lnc-ANKS6-1	ATF5	chr19	50431959	50437192	Up	chr9	101609510	101634697	Antisense	Up	101309510	101934697	trans
lnc-ANKS6-1	CEBPZ	chr2	37428755	37458856	Up	chr9	101609510	101634697	Antisense	Up	101309510	101934697	trans
lnc-ANKS6-1	EIF2A	chr3	150264465	150302029	Up	chr9	101609510	101634697	Antisense	Up	101309510	101934697	trans
lnc-AP1S2-1	ATF5	chr19	50431959	50437192	Up	chrX	15801327	15802658	Antisense	Up	15501327	16102658	trans
lnc-AP1S2-1	CEBPZ	chr2	37428755	37458856	Up	chrX	15801327	15802658	Antisense	Up	15501327	16102658	trans
lnc-AP1S2-1	EIF2A	chr3	150264465	150302029	Up	chrX	15801327	15802658	Antisense	Up	15501327	16102658	trans
lnc-AP3S1-15	ATF5	chr19	50431959	50437192	Up	chr5	114598201	114599145	Antisense	Up	114298201	114899145	trans
lnc-AP3S1-15	CEBPZ	chr2	37428755	37458856	Up	chr5	114598201	114599145	Antisense	Up	114298201	114899145	trans
lnc-AP3S1-15	EIF2A	chr3	150264465	150302029	Up	chr5	114598201	114599145	Antisense	Up	114298201	114899145	trans
lnc-APC-4	ATF5	chr19	50431959	50437192	Up	chr5	111527713	111545836	Antisense	Up	111227713	111845836	trans
lnc-APC-4	CEBPZ	chr2	37428755	37458856	Up	chr5	111527713	111545836	Antisense	Up	111227713	111845836	trans
lnc-APC-4	EIF2A	chr3	150264465	150302029	Up	chr5	111527713	111545836	Antisense	Up	111227713	111845836	trans
lnc-ARL1-3	ATF5	chr19	50431959	50437192	Up	chr12	101727190	101742307	Antisense	Up	101427190	102042307	trans
lnc-ARL1-3	CEBPZ	chr2	37428755	37458856	Up	chr12	101727190	101742307	Antisense	Up	101427190	102042307	trans
lnc-ARL1-3	EIF2A	chr3	150264465	150302029	Up	chr12	101727190	101742307	Antisense	Up	101427190	102042307	trans
lnc-ARL4D-1	EIF2A	chr3	150264465	150302029	Up	chr17	41455316	41458968	Antisense	Up	41155316	41758968	trans
lnc-ASCC2-1	ATF5	chr19	50431959	50437192	Up	chr22	30363671	30498134	Sense	Up	30063671	30798134	trans
lnc-ASCC2-1	CEBPZ	chr2	37428755	37458856	Up	chr22	30363671	30498134	Sense	Up	30063671	30798134	trans
lnc-ASCC2-1	EIF2A	chr3	150264465	150302029	Up	chr22	30363671	30498134	Sense	Up	30063671	30798134	trans
lnc-ATF7IP2-1	EIF2AK1	chr7	6061881	6098861	Up	chr16	10623296	10625939	Intron	Up	10323296	10925939	trans
lnc-ATG12-5	EIF2AK1	chr7	6061881	6098861	Up	chr5	115419213	115421113	Antisense	Up	115119213	115721113	trans
lnc-ATM-1	ATF5	chr19	50431959	50437192	Up	chr11	108368841	108373612	Antisense	Up	108068841	108673612	trans
lnc-ATM-1	CEBPZ	chr2	37428755	37458856	Up	chr11	108368841	108373612	Antisense	Up	108068841	108673612	trans
lnc-ATM-1	EIF2A	chr3	150264465	150302029	Up	chr11	108368841	108373612	Antisense	Up	108068841	108673612	trans
lnc-ATP6V1C2-2	ATF5	chr19	50431959	50437192	Up	chr2	10728455	10744956	Antisense	Up	10428455	11044956	trans
lnc-ATP6V1C2-2	CEBPZ	chr2	37428755	37458856	Up	chr2	10728455	10744956	Antisense	Up	10428455	11044956	trans
lnc-ATP6V1C2-2	EIF2A	chr3	150264465	150302029	Up	chr2	10728455	10744956	Antisense	Up	10428455	11044956	trans
lnc-BCAP31-1	MCL1	chr1	150547032	150552066	Up	chrX	153009573	153009904	Antisense	Up	152709573	153309904	trans
lnc-BLID-7	EIF2AK1	chr7	6061881	6098861	Up	chr11	121465022	121476369	Antisense	Up	121165022	121776369	trans
lnc-BRAT1-2	EIF2AK1	chr7	6061881	6098861	Up	chr7	2652055	2657331	Antisense	Up	2352055	2957331	trans
lnc-C17orf48-1	ATF5	chr19	50431959	50437192	Up	chr17	10584050	10587305	Intron	Up	10284050	10887305	trans
lnc-C17orf48-1	CEBPZ	chr2	37428755	37458856	Up	chr17	10584050	10587305	Intron	Up	10284050	10887305	trans
lnc-C17orf48-1	EIF2A	chr3	150264465	150302029	Up	chr17	10584050	10587305	Intron	Up	10284050	10887305	trans
lnc-C19orf6-3	EIF2AK1	chr7	6061881	6098861	Up	chr19	1036383	1037105	Antisense	Up	736383	1337105	trans
lnc-C1orf124-1	SERP1	chr3	150259781	150321015	Up	chr1	231464487	231467017	Intergenic	Up	231164487	231767017	trans
lnc-C1orf132-1	MCL1	chr1	150547032	150552066	Up	chr1	207974862	208042495	Sense	Down	207674862	208342495	trans
lnc-C1QBP-1	EIF2AK1	chr7	6061881	6098861	Up	chr17	5328458	5336196	Sense	Up	5028458	5636196	trans
lnc-C1QL3-1	EIF2A	chr3	150264465	150302029	Up	chr10	16554078	16556515	Sense	Up	16254078	16856515	trans
lnc-C1S-1	ATF5	chr19	50431959	50437192	Up	chr12	7087682	7089103	Antisense	Up	6787682	7389103	trans
lnc-C1S-1	CEBPZ	chr2	37428755	37458856	Up	chr12	7087682	7089103	Antisense	Up	6787682	7389103	trans
lnc-C1S-1	EIF2A	chr3	150264465	150302029	Up	chr12	7087682	7089103	Antisense	Up	6787682	7389103	trans
lnc-C2CD4A-9	MCL1	chr1	150547032	150552066	Up	chr15	62211489	62211739	Antisense	Up	61911489	62511739	trans
lnc-C3orf24-1	ATF5	chr19	50431959	50437192	Up	chr3	10123000	10149915	Sense	Up	9823000	10449915	trans
lnc-C3orf24-1	EIF2A	chr3	150264465	150302029	Up	chr3	10123000	10149915	Sense	Up	9823000	10449915	trans
lnc-C4orf21-1	ATF5	chr19	50431959	50437192	Up	chr4	113567631	113571207	Sense	Up	113267631	113871207	trans
lnc-C4orf21-1	CEBPZ	chr2	37428755	37458856	Up	chr4	113567631	113571207	Sense	Up	113267631	113871207	trans
lnc-C4orf21-1	EIF2A	chr3	150264465	150302029	Up	chr4	113567631	113571207	Sense	Up	113267631	113871207	trans
lnc-C4orf34-3	MCL1	chr1	150547032	150552066	Up	chr4	39548920	39551206	Intron	Up	39248920	39851206	trans
lnc-C5orf25-1	EIF2AK1	chr7	6061881	6098861	Up	chr5	175774943	175780587	Antisense	Up	175474943	176080587	trans
lnc-C5orf35-3	ATF5	chr19	50431959	50437192	Up	chr5	56223700	56225400	Antisense	Up	55923700	56525400	trans
lnc-C5orf35-3	CEBPZ	chr2	37428755	37458856	Up	chr5	56223700	56225400	Antisense	Up	55923700	56525400	trans
lnc-C5orf35-3	EIF2A	chr3	150264465	150302029	Up	chr5	56223700	56225400	Antisense	Up	55923700	56525400	trans
lnc-C5orf39-3	ATF5	chr19	50431959	50437192	Up	chr5	43050279	43054670	Intergenic	Up	42750279	43354670	trans
lnc-C5orf39-3	CEBPZ	chr2	37428755	37458856	Up	chr5	43050279	43054670	Intergenic	Up	42750279	43354670	trans
lnc-C5orf39-3	EIF2A	chr3	150264465	150302029	Up	chr5	43050279	43054670	Intergenic	Up	42750279	43354670	trans
lnc-C6orf99-7	EIF2AK1	chr7	6061881	6098861	Up	chr6	159420275	159462085	Antisense	Up	159120275	159762085	trans
lnc-C9orf3-6	ATF5	chr19	50431959	50437192	Up	chr9	98207059	98208373	Intron	Up	97907059	98508373	trans
lnc-C9orf3-6	CEBPZ	chr2	37428755	37458856	Up	chr9	98207059	98208373	Intron	Up	97907059	98508373	trans
lnc-C9orf3-6	EIF2A	chr3	150264465	150302029	Up	chr9	98207059	98208373	Intron	Up	97907059	98508373	trans
lnc-C9orf57-3	ATF5	chr19	50431959	50437192	Up	chr9	74598216	74600973	Intergenic	Up	74298216	74900973	trans
lnc-C9orf57-3	CEBPZ	chr2	37428755	37458856	Up	chr9	74598216	74600973	Intergenic	Up	74298216	74900973	trans
lnc-C9orf57-3	EIF2A	chr3	150264465	150302029	Up	chr9	74598216	74600973	Intergenic	Up	74298216	74900973	trans
lnc-CBY3-3	EIF2A	chr3	150264465	150302029	Up	chr5	179157348	179157681	Antisense	Up	178857348	179457681	trans
lnc-CCDC148-1	ATF5	chr19	50431959	50437192	Up	chr2	159514848	159591514	Antisense	Up	159214848	159891514	trans
lnc-CCDC148-1	CEBPZ	chr2	37428755	37458856	Up	chr2	159514848	159591514	Antisense	Up	159214848	159891514	trans
lnc-CCDC148-1	EIF2A	chr3	150264465	150302029	Up	chr2	159514848	159591514	Antisense	Up	159214848	159891514	trans
lnc-CD226-5	EIF2AK1	chr7	6061881	6098861	Up	chr18	67338179	67397172	Antisense	Down	67038179	67697172	trans
lnc-CD37-1	EIF2AK1	chr7	6061881	6098861	Up	chr19	49843851	49846592	Sense	Up	49543851	50146592	trans
lnc-CD53-2	EIF2A	chr3	150264465	150302029	Up	chr1	111505923	111507271	Antisense	Up	111205923	111807271	trans
lnc-CDKL1-1	CEBPZ	chr2	37428755	37458856	Up	chr14	50793243	50794627	Intergenic	Up	50493243	51094627	trans
lnc-CDKL1-1	EIF2A	chr3	150264465	150302029	Up	chr14	50793243	50794627	Intergenic	Up	50493243	51094627	trans
lnc-CHAC1-4	ATF5	chr19	50431959	50437192	Up	chr15	41309004	41320091	Antisense	Up	41009004	41620091	trans
lnc-CHAC1-4	CEBPZ	chr2	37428755	37458856	Up	chr15	41309004	41320091	Antisense	Up	41009004	41620091	trans
lnc-CHAC1-4	EIF2A	chr3	150264465	150302029	Up	chr15	41309004	41320091	Antisense	Up	41009004	41620091	trans
lnc-CHRNA3-5	ATF5	chr19	50431959	50437192	Up	chr15	78792407	78792890	Antisense	Up	78492407	79092890	trans
lnc-CHRNA3-5	CEBPZ	chr2	37428755	37458856	Up	chr15	78792407	78792890	Antisense	Up	78492407	79092890	trans
lnc-CHRNA3-5	EIF2A	chr3	150264465	150302029	Up	chr15	78792407	78792890	Antisense	Up	78492407	79092890	trans
lnc-CHRNA9-2	ATF5	chr19	50431959	50437192	Up	chr4	40428135	40429602	Intron	Up	40128135	40729602	trans
lnc-CHRNA9-2	CEBPZ	chr2	37428755	37458856	Up	chr4	40428135	40429602	Intron	Up	40128135	40729602	trans
lnc-CHRNA9-2	EIF2A	chr3	150264465	150302029	Up	chr4	40428135	40429602	Intron	Up	40128135	40729602	trans
lnc-CKS1B-2	MCL1	chr1	150547032	150552066	Up	chr1	154934300	154935099	Antisense	Up	154634300	155235099	trans
lnc-COL28A1-1	EIF2AK1	chr7	6061881	6098861	Up	chr7	7589263	7606627	Sense	Up	7289263	7906627	trans
lnc-CPM-2	ATF5	chr19	50431959	50437192	Up	chr12	69068150	69081535	Sense	Up	68768150	69381535	trans
lnc-CPM-2	CEBPZ	chr2	37428755	37458856	Up	chr12	69068150	69081535	Sense	Up	68768150	69381535	trans
lnc-CPM-2	EIF2A	chr3	150264465	150302029	Up	chr12	69068150	69081535	Sense	Up	68768150	69381535	trans
lnc-CPSF4-1	SERP1	chr3	150259781	150321015	Up	chr7	99070557	99079949	Sense	Up	98770557	99379949	trans
lnc-CREG1-2	ATF5	chr19	50431959	50437192	Up	chr1	167426619	167427898	Intron	Up	167126619	167727898	trans
lnc-CREG1-2	CEBPZ	chr2	37428755	37458856	Up	chr1	167426619	167427898	Intron	Up	167126619	167727898	trans
lnc-CREG1-2	EIF2A	chr3	150264465	150302029	Up	chr1	167426619	167427898	Intron	Up	167126619	167727898	trans
lnc-CSNK1A1-7	ATF5	chr19	50431959	50437192	Up	chr5	148997110	149001021	Antisense	Up	148697110	149301021	trans
lnc-CSNK1A1-7	CEBPZ	chr2	37428755	37458856	Up	chr5	148997110	149001021	Antisense	Up	148697110	149301021	trans
lnc-CSNK1A1-7	EIF2A	chr3	150264465	150302029	Up	chr5	148997110	149001021	Antisense	Up	148697110	149301021	trans
lnc-CTRB1-2	EIF2A	chr3	150264465	150302029	Up	chr16	75170863	75263637	Sense	Up	74870863	75563637	trans
lnc-CXCL16-1	EIF2AK1	chr7	6061881	6098861	Up	chr17	4635050	4635666	Antisense	Up	4335050	4935666	trans
lnc-CYB5D2-2	ATF5	chr19	50431959	50437192	Up	chr17	4067203	4068007	Intron	Up	3767203	4368007	trans
lnc-CYB5D2-2	CEBPZ	chr2	37428755	37458856	Up	chr17	4067203	4068007	Intron	Up	3767203	4368007	trans
lnc-CYB5R2-3	CEBPZ	chr2	37428755	37458856	Up	chr11	7405072	7534884	Sense	Down	7105072	7834884	trans
lnc-DAPP1-1	EIF2AK1	chr7	6061881	6098861	Up	chr4	100871162	100887550	Sense	Up	100571162	101187550	trans
lnc-DHX36-3	EIF2AK1	chr7	6061881	6098861	Up	chr3	153971974	153977399	Antisense	Up	153671974	154277399	trans
lnc-DLEU7-5	ATF5	chr19	50431959	50437192	Up	chr13	51508739	51522354	Antisense	Up	51208739	51822354	trans
lnc-DLEU7-5	CEBPZ	chr2	37428755	37458856	Up	chr13	51508739	51522354	Antisense	Up	51208739	51822354	trans
lnc-DLEU7-5	EIF2A	chr3	150264465	150302029	Up	chr13	51508739	51522354	Antisense	Up	51208739	51822354	trans
lnc-DNAJA1-1	ATF5	chr19	50431959	50437192	Up	chr9	33044447	33045593	Intron	Up	32744447	33345593	trans
lnc-DNAJA1-1	CEBPZ	chr2	37428755	37458856	Up	chr9	33044447	33045593	Intron	Up	32744447	33345593	trans
lnc-DNAJA1-1	EIF2A	chr3	150264465	150302029	Up	chr9	33044447	33045593	Intron	Up	32744447	33345593	trans
lnc-DTHD1-5	EIF2AK1	chr7	6061881	6098861	Up	chr4	33883236	33981558	Antisense	Down	33583236	34281558	trans
lnc-DUSP11-3	EIF2AK1	chr7	6061881	6098861	Up	chr2	74065981	74084081	Antisense	Up	73765981	74384081	trans
lnc-DUXA-1	EIF2AK1	chr7	6061881	6098861	Up	chr19	57813908	57814300	Intergenic	Up	57513908	58114300	trans
lnc-DYSF-12	ATF5	chr19	50431959	50437192	Up	chr2	72402068	72405839	Intergenic	Up	72102068	72705839	trans
lnc-DYSF-12	CEBPZ	chr2	37428755	37458856	Up	chr2	72402068	72405839	Intergenic	Up	72102068	72705839	trans
lnc-DYSF-12	EIF2A	chr3	150264465	150302029	Up	chr2	72402068	72405839	Intergenic	Up	72102068	72705839	trans
lnc-EEF1B2-2	ATF5	chr19	50431959	50437192	Up	chr2	206949328	206952412	Antisense	Up	206649328	207252412	trans
lnc-EEF1B2-2	CEBPZ	chr2	37428755	37458856	Up	chr2	206949328	206952412	Antisense	Up	206649328	207252412	trans
lnc-EEF1B2-2	EIF2A	chr3	150264465	150302029	Up	chr2	206949328	206952412	Antisense	Up	206649328	207252412	trans
lnc-EIF2AK4-3	EIF2AK1	chr7	6061881	6098861	Up	chr15	40381032	40381587	Intron	Up	40081032	40681587	trans
lnc-EPOR-2	ATF5	chr19	50431959	50437192	Up	chr19	11478798	11485611	Antisense	Up	11178798	11785611	trans
lnc-EPOR-2	CEBPZ	chr2	37428755	37458856	Up	chr19	11478798	11485611	Antisense	Up	11178798	11785611	trans
lnc-EPOR-2	EIF2A	chr3	150264465	150302029	Up	chr19	11478798	11485611	Antisense	Up	11178798	11785611	trans
lnc-ERAL1-3	EIF2AK1	chr7	6061881	6098861	Up	chr17	27224755	27226412	Antisense	Up	26924755	27526412	trans
lnc-ESD-1	ATF5	chr19	50431959	50437192	Up	chr13	47297465	47379493	Antisense	Up	46997465	47679493	trans
lnc-ESD-1	CEBPZ	chr2	37428755	37458856	Up	chr13	47297465	47379493	Antisense	Up	46997465	47679493	trans
lnc-ESD-1	EIF2A	chr3	150264465	150302029	Up	chr13	47297465	47379493	Antisense	Up	46997465	47679493	trans
lnc-EXOC3-3	EIF2AK1	chr7	6061881	6098861	Up	chr5	468366	472762	Antisense	Up	168366	772762	trans
lnc-FABP3-1	ATF5	chr19	50431959	50437192	Up	chr1	31805913	31819646	Antisense	Up	31505913	32119646	trans
lnc-FABP3-1	CEBPZ	chr2	37428755	37458856	Up	chr1	31805913	31819646	Antisense	Up	31505913	32119646	trans
lnc-FABP3-1	EIF2A	chr3	150264465	150302029	Up	chr1	31805913	31819646	Antisense	Up	31505913	32119646	trans
lnc-FAM117A-1	EIF2AK1	chr7	6061881	6098861	Up	chr17	47794948	47866542	Sense	Up	47494948	48166542	trans
lnc-FAM196A-1	EIF2AK1	chr7	6061881	6098861	Up	chr10	128798540	128824771	Antisense	Up	128498540	129124771	trans
lnc-FAM198B-1	CEBPZ	chr2	37428755	37458856	Up	chr4	159120247	159123554	Intergenic	Up	158820247	159423554	trans
lnc-FAM198B-1	EIF2A	chr3	150264465	150302029	Up	chr4	159120247	159123554	Intergenic	Up	158820247	159423554	trans
lnc-FAM8A1-2	EIF2AK1	chr7	6061881	6098861	Up	chr6	17706487	17711388	Antisense	Up	17406487	18011388	trans
lnc-FAM96B-3	ATF5	chr19	50431959	50437192	Up	chr16	66978562	66978999	Antisense	Up	66678562	67278999	trans
lnc-FAM96B-3	CEBPZ	chr2	37428755	37458856	Up	chr16	66978562	66978999	Antisense	Up	66678562	67278999	trans
lnc-FAM96B-3	EIF2A	chr3	150264465	150302029	Up	chr16	66978562	66978999	Antisense	Up	66678562	67278999	trans
lnc-FBXL3-1	CASP7	NA	NA	NA	NA	chr13	77564116	77601220	Antisense	Up	77264116	77901220	trans
lnc-FBXL3-1	SERP1	chr3	150259781	150321015	Up	chr13	77564116	77601220	Antisense	Up	77264116	77901220	trans
lnc-FBXO47-1	EIF2AK1	chr7	6061881	6098861	Up	chr17	37075053	37078022	Intergenic	Up	36775053	37378022	trans
lnc-FEZ1-2	EIF2AK1	chr7	6061881	6098861	Up	chr11	125301033	125314212	Antisense	Up	125001033	125614212	trans
lnc-FOXM1-1	ATF5	chr19	50431959	50437192	Up	chr12	3048888	3050025	Antisense	Up	2748888	3350025	trans
lnc-FOXM1-1	CEBPZ	chr2	37428755	37458856	Up	chr12	3048888	3050025	Antisense	Up	2748888	3350025	trans
lnc-FRMD1-8	EIF2AK1	chr7	6061881	6098861	Up	chr6	168368807	168370046	Antisense	Up	168068807	168670046	trans
lnc-GAMT-7	ATF5	chr19	50431959	50437192	Up	chr19	1372236	1374363	Antisense	Up	1072236	1674363	trans
lnc-GAMT-7	CEBPZ	chr2	37428755	37458856	Up	chr19	1372236	1374363	Antisense	Up	1072236	1674363	trans
lnc-GK-3	ATF5	chr19	50431959	50437192	Up	chrX	31115793	31187673	Antisense	Up	30815793	31487673	trans
lnc-GK-3	CEBPZ	chr2	37428755	37458856	Up	chrX	31115793	31187673	Antisense	Up	30815793	31487673	trans
lnc-GLRX2-1	ATF5	chr19	50431959	50437192	Up	chr1	193059995	193060686	Intron	Up	192759995	193360686	trans
lnc-GLRX2-1	CEBPZ	chr2	37428755	37458856	Up	chr1	193059995	193060686	Intron	Up	192759995	193360686	trans
lnc-GLRX2-1	EIF2A	chr3	150264465	150302029	Up	chr1	193059995	193060686	Intron	Up	192759995	193360686	trans
lnc-GLUD1-2	MCL1	chr1	150547032	150552066	Up	chr10	88769541	88775539	Antisense	Up	88469541	89075539	trans
lnc-GPLD1-1	ATF5	chr19	50431959	50437192	Up	chr6	24424792	24436108	Sense	Up	24124792	24736108	trans
lnc-GPLD1-1	CEBPZ	chr2	37428755	37458856	Up	chr6	24424792	24436108	Sense	Up	24124792	24736108	trans
lnc-GPLD1-1	EIF2A	chr3	150264465	150302029	Up	chr6	24424792	24436108	Sense	Up	24124792	24736108	trans
lnc-GPR160-1	ATF5	chr19	50431959	50437192	Up	chr3	169805597	169807378	Antisense	Up	169505597	170107378	trans
lnc-GPR160-1	CEBPZ	chr2	37428755	37458856	Up	chr3	169805597	169807378	Antisense	Up	169505597	170107378	trans
lnc-GPR160-1	EIF2A	chr3	150264465	150302029	Up	chr3	169805597	169807378	Antisense	Up	169505597	170107378	trans
lnc-GPR27-5	ATF5	chr19	50431959	50437192	Up	chr3	71776211	71778846	Antisense	Up	71476211	72078846	trans
lnc-GPR27-5	CEBPZ	chr2	37428755	37458856	Up	chr3	71776211	71778846	Antisense	Up	71476211	72078846	trans
lnc-GPR27-5	EIF2A	chr3	150264465	150302029	Up	chr3	71776211	71778846	Antisense	Up	71476211	72078846	trans
lnc-GPRC5D-1	ATF5	chr19	50431959	50437192	Up	chr12	13128248	13132729	Intron	Up	12828248	13432729	trans
lnc-GPRC5D-1	CEBPZ	chr2	37428755	37458856	Up	chr12	13128248	13132729	Intron	Up	12828248	13432729	trans
lnc-GPRC5D-1	EIF2A	chr3	150264465	150302029	Up	chr12	13128248	13132729	Intron	Up	12828248	13432729	trans
lnc-GRID2IP-1	EIF2AK1	chr7	6061881	6098861	Up	chr7	6618195	6629569	Antisense	Up	6318195	6929569	trans
lnc-GYG2P1-1	EIF2AK1	chr7	6061881	6098861	Up	chrY	14774285	14775639	Antisense	Up	14474285	15075639	trans
lnc-HCN3-1	EIF2A	chr3	150264465	150302029	Up	chr1	155232235	155233382	Antisense	Up	154932235	155533382	trans
lnc-HDLBP-3	ATF5	chr19	50431959	50437192	Up	chr2	242132475	242147231	Antisense	Up	241832475	242447231	trans
lnc-HDLBP-3	CEBPZ	chr2	37428755	37458856	Up	chr2	242132475	242147231	Antisense	Up	241832475	242447231	trans
lnc-HMBOX1-8	ATF5	chr19	50431959	50437192	Up	chr8	28967108	28967444	Antisense	Up	28667108	29267444	trans
lnc-HMBOX1-8	CEBPZ	chr2	37428755	37458856	Up	chr8	28967108	28967444	Antisense	Up	28667108	29267444	trans
lnc-HMBOX1-8	EIF2A	chr3	150264465	150302029	Up	chr8	28967108	28967444	Antisense	Up	28667108	29267444	trans
lnc-IARS2-2	EIF2A	chr3	150264465	150302029	Up	chr1	220206305	220224929	Antisense	Up	219906305	220524929	trans
lnc-ID2-1	CEBPZ	chr2	37428755	37458856	Up	chr2	8806772	8810423	Intergenic	Up	8506772	9110423	trans
lnc-ID2-1	EIF2A	chr3	150264465	150302029	Up	chr2	8806772	8810423	Intergenic	Up	8506772	9110423	trans
lnc-IKZF2-9	ATF5	chr19	50431959	50437192	Up	chr2	214149141	214150635	Antisense	Up	213849141	214450635	trans
lnc-IKZF2-9	CEBPZ	chr2	37428755	37458856	Up	chr2	214149141	214150635	Antisense	Up	213849141	214450635	trans
lnc-IKZF2-9	EIF2A	chr3	150264465	150302029	Up	chr2	214149141	214150635	Antisense	Up	213849141	214450635	trans
lnc-IL23A-2	EIF2AK1	chr7	6061881	6098861	Up	chr12	56693925	56708592	Antisense	Up	56393925	57008592	trans
lnc-ING1-3	ATF5	chr19	50431959	50437192	Up	chr13	111545044	111546727	Antisense	Up	111245044	111846727	trans
lnc-ING1-3	CEBPZ	chr2	37428755	37458856	Up	chr13	111545044	111546727	Antisense	Up	111245044	111846727	trans
lnc-ING1-3	EIF2A	chr3	150264465	150302029	Up	chr13	111545044	111546727	Antisense	Up	111245044	111846727	trans
lnc-INPPL1-1	ATF5	chr19	50431959	50437192	Up	chr11	72013182	72014009	Antisense	Up	71713182	72314009	trans
lnc-INPPL1-1	CEBPZ	chr2	37428755	37458856	Up	chr11	72013182	72014009	Antisense	Up	71713182	72314009	trans
lnc-INTS12-1	ATF5	chr19	50431959	50437192	Up	chr4	106848216	106853879	Antisense	Up	106548216	107153879	trans
lnc-INTS12-1	CEBPZ	chr2	37428755	37458856	Up	chr4	106848216	106853879	Antisense	Up	106548216	107153879	trans
lnc-INTS12-2	EIF2A	chr3	150264465	150302029	Up	chr4	106600206	106601251	Intergenic	Up	106300206	106901251	trans
lnc-IQCG-2	ATF5	chr19	50431959	50437192	Up	chr3	197557555	197558167	Antisense	Up	197257555	197858167	trans
lnc-IQCG-2	CEBPZ	chr2	37428755	37458856	Up	chr3	197557555	197558167	Antisense	Up	197257555	197858167	trans
lnc-IQCG-2	EIF2A	chr3	150264465	150302029	Up	chr3	197557555	197558167	Antisense	Up	197257555	197858167	trans
lnc-IRAK4-2	EIF2A	chr3	150264465	150302029	Up	chr12	44130430	44134870	Antisense	Up	43830430	44434870	trans
lnc-IRF1-4	ATF5	chr19	50431959	50437192	Up	chr5	131729544	131733095	Antisense	Up	131429544	132033095	trans
lnc-IRF1-4	CEBPZ	chr2	37428755	37458856	Up	chr5	131729544	131733095	Antisense	Up	131429544	132033095	trans
lnc-IRF1-4	EIF2A	chr3	150264465	150302029	Up	chr5	131729544	131733095	Antisense	Up	131429544	132033095	trans
lnc-KATNAL2-5	ATF5	chr19	50431959	50437192	Up	chr18	44632316	44634433	Antisense	Up	44332316	44934433	trans
lnc-KATNAL2-5	CEBPZ	chr2	37428755	37458856	Up	chr18	44632316	44634433	Antisense	Up	44332316	44934433	trans
lnc-KATNAL2-5	EIF2A	chr3	150264465	150302029	Up	chr18	44632316	44634433	Antisense	Up	44332316	44934433	trans
lnc-KAZALD1-1	EIF2AK1	chr7	6061881	6098861	Up	chr10	102826055	102827888	Intergenic	Up	102526055	103127888	trans
lnc-KCNC1-2	EIF2AK1	chr7	6061881	6098861	Up	chr11	17816330	17818197	Intron	Down	17516330	18118197	trans
lnc-KCNH5-3	ATF5	chr19	50431959	50437192	Up	chr14	62570095	62583893	Intergenic	Up	62270095	62883893	trans
lnc-KCNH5-3	CEBPZ	chr2	37428755	37458856	Up	chr14	62570095	62583893	Intergenic	Up	62270095	62883893	trans
lnc-KCNH5-3	EIF2A	chr3	150264465	150302029	Up	chr14	62570095	62583893	Intergenic	Up	62270095	62883893	trans
lnc-KCNT1-2	CEBPZ	chr2	37428755	37458856	Up	chr9	138900081	138901544	Intron	Up	138600081	139201544	trans
lnc-KCTD4-1	ATF5	chr19	50431959	50437192	Up	chr13	45693999	45695288	Antisense	Up	45393999	45995288	trans
lnc-KCTD4-1	CEBPZ	chr2	37428755	37458856	Up	chr13	45693999	45695288	Antisense	Up	45393999	45995288	trans
lnc-KCTD4-1	EIF2A	chr3	150264465	150302029	Up	chr13	45693999	45695288	Antisense	Up	45393999	45995288	trans
lnc-KIAA0020-7	EIF2A	chr3	150264465	150302029	Up	chr9	2192966	2193572	Antisense	Up	1892966	2493572	trans
lnc-KIAA0196-5	ATF5	chr19	50431959	50437192	Up	chr8	126016111	126021316	Antisense	Up	125716111	126321316	trans
lnc-KIAA0196-5	CEBPZ	chr2	37428755	37458856	Up	chr8	126016111	126021316	Antisense	Up	125716111	126321316	trans
lnc-KIAA0196-5	EIF2A	chr3	150264465	150302029	Up	chr8	126016111	126021316	Antisense	Up	125716111	126321316	trans
lnc-KIAA1731-1	ATF5	chr19	50431959	50437192	Up	chr11	93466522	93469469	Antisense	Up	93166522	93769469	trans
lnc-KIAA1731-1	CEBPZ	chr2	37428755	37458856	Up	chr11	93466522	93469469	Antisense	Up	93166522	93769469	trans
lnc-KIAA1731-1	EIF2A	chr3	150264465	150302029	Up	chr11	93466522	93469469	Antisense	Up	93166522	93769469	trans
lnc-KLHL25-6	ATF5	chr19	50431959	50437192	Up	chr15	86122095	86123409	Antisense	Up	85822095	86423409	trans
lnc-KLHL25-6	CEBPZ	chr2	37428755	37458856	Up	chr15	86122095	86123409	Antisense	Up	85822095	86423409	trans
lnc-KLHL25-6	EIF2A	chr3	150264465	150302029	Up	chr15	86122095	86123409	Antisense	Up	85822095	86423409	trans
lnc-KMO-1	EIF2AK1	chr7	6061881	6098861	Up	chr1	241577056	241597028	Intergenic	Down	241277056	241897028	trans
lnc-KRT80-10	CEBPZ	chr2	37428755	37458856	Up	chr12	52389346	52390807	Antisense	Up	52089346	52690807	trans
lnc-KRT80-10	EIF2A	chr3	150264465	150302029	Up	chr12	52389346	52390807	Antisense	Up	52089346	52690807	trans
lnc-LALBA-1	SERP1	chr3	150259781	150321015	Up	chr12	48877069	48894744	Antisense	Up	48577069	49194744	trans
lnc-LAMA5-2	EIF2AK1	chr7	6061881	6098861	Up	chr20	60883010	60884313	Sense	Up	60583010	61184313	trans
lnc-LAMA5-3	EIF2AK1	chr7	6061881	6098861	Up	chr20	60875854	60878715	Antisense	Up	60575854	61178715	trans
lnc-LENG9-4	EIF2AK1	chr7	6061881	6098861	Up	chr19	54960789	54963440	Antisense	Up	54660789	55263440	trans
lnc-LEPRE1-1	CEBPZ	chr2	37428755	37458856	Up	chr1	43241468	43250520	Intergenic	Up	42941468	43550520	trans
lnc-LEPRE1-1	EIF2A	chr3	150264465	150302029	Up	chr1	43241468	43250520	Intergenic	Up	42941468	43550520	trans
lnc-LETM2-5	ATF5	chr19	50431959	50437192	Up	chr8	38188441	38189023	Antisense	Up	37888441	38489023	trans
lnc-LETM2-5	CEBPZ	chr2	37428755	37458856	Up	chr8	38188441	38189023	Antisense	Up	37888441	38489023	trans
lnc-LETM2-5	EIF2A	chr3	150264465	150302029	Up	chr8	38188441	38189023	Antisense	Up	37888441	38489023	trans
lnc-LIPG-2	ATF5	chr19	50431959	50437192	Up	chr18	47013708	47018248	Sense	Up	46713708	47318248	trans
lnc-LIPG-2	CEBPZ	chr2	37428755	37458856	Up	chr18	47013708	47018248	Sense	Up	46713708	47318248	trans
lnc-LIPG-2	EIF2A	chr3	150264465	150302029	Up	chr18	47013708	47018248	Sense	Up	46713708	47318248	trans
lnc-LRRC38-2	ATF5	chr19	50431959	50437192	Up	chr1	14104759	14105625	Antisense	Up	13804759	14405625	trans
lnc-LRRC38-2	CEBPZ	chr2	37428755	37458856	Up	chr1	14104759	14105625	Antisense	Up	13804759	14405625	trans
lnc-LRRC38-2	EIF2A	chr3	150264465	150302029	Up	chr1	14104759	14105625	Antisense	Up	13804759	14405625	trans
lnc-LSM5-2	ATF5	chr19	50431959	50437192	Up	chr7	32624855	32630543	Sense	Up	32324855	32930543	trans
lnc-LSM5-2	CEBPZ	chr2	37428755	37458856	Up	chr7	32624855	32630543	Sense	Up	32324855	32930543	trans
lnc-LSM5-2	EIF2A	chr3	150264465	150302029	Up	chr7	32624855	32630543	Sense	Up	32324855	32930543	trans
lnc-LSS-1	ATF5	chr19	50431959	50437192	Up	chr21	47671462	47674047	Sense	Up	47371462	47974047	trans
lnc-LSS-1	CEBPZ	chr2	37428755	37458856	Up	chr21	47671462	47674047	Sense	Up	47371462	47974047	trans
lnc-MACC1-1	CEBPZ	chr2	37428755	37458856	Up	chr7	19938141	20180103	Sense	Up	19638141	20480103	trans
lnc-MANSC4-2	ATF5	chr19	50431959	50437192	Up	chr12	27951459	27953660	Antisense	Up	27651459	28253660	trans
lnc-MANSC4-2	CEBPZ	chr2	37428755	37458856	Up	chr12	27951459	27953660	Antisense	Up	27651459	28253660	trans
lnc-MANSC4-2	EIF2A	chr3	150264465	150302029	Up	chr12	27951459	27953660	Antisense	Up	27651459	28253660	trans
lnc-MAP6-1	ATF5	chr19	50431959	50437192	Up	chr11	75283073	75283832	Antisense	Up	74983073	75583832	trans
lnc-MAP6-1	CEBPZ	chr2	37428755	37458856	Up	chr11	75283073	75283832	Antisense	Up	74983073	75583832	trans
lnc-MAP6-1	EIF2A	chr3	150264465	150302029	Up	chr11	75283073	75283832	Antisense	Up	74983073	75583832	trans
lnc-MARCH4-1	ATF5	chr19	50431959	50437192	Up	chr2	217250010	217277419	Antisense	Up	216950010	217577419	trans
lnc-MARCH4-1	CEBPZ	chr2	37428755	37458856	Up	chr2	217250010	217277419	Antisense	Up	216950010	217577419	trans
lnc-MBOAT1-13	EIF2AK1	chr7	6061881	6098861	Up	chr6	19816346	19857974	Antisense	Up	19516346	20157974	trans
lnc-MDM4-8	ATF5	chr19	50431959	50437192	Up	chr1	204372517	204373870	Antisense	Up	204072517	204673870	trans
lnc-MDM4-8	CEBPZ	chr2	37428755	37458856	Up	chr1	204372517	204373870	Antisense	Up	204072517	204673870	trans
lnc-MDM4-8	EIF2A	chr3	150264465	150302029	Up	chr1	204372517	204373870	Antisense	Up	204072517	204673870	trans
lnc-MEST-2	ATF5	chr19	50431959	50437192	Up	chr7	130147500	130148123	Antisense	Up	129847500	130448123	trans
lnc-MEST-2	CEBPZ	chr2	37428755	37458856	Up	chr7	130147500	130148123	Antisense	Up	129847500	130448123	trans
lnc-MEST-2	EIF2A	chr3	150264465	150302029	Up	chr7	130147500	130148123	Antisense	Up	129847500	130448123	trans
lnc-MFSD2A-1	ATF5	chr19	50431959	50437192	Up	chr1	40363416	40364770	Intron	Up	40063416	40664770	trans
lnc-MFSD8-1	SERP1	chr3	150259781	150321015	Up	chr4	128761352	128765195	Intergenic	Up	128461352	129065195	trans
lnc-MIXL1-2	ATF5	chr19	50431959	50437192	Up	chr1	226335703	226342772	Antisense	Up	226035703	226642772	trans
lnc-MIXL1-2	CEBPZ	chr2	37428755	37458856	Up	chr1	226335703	226342772	Antisense	Up	226035703	226642772	trans
lnc-MIXL1-2	EIF2A	chr3	150264465	150302029	Up	chr1	226335703	226342772	Antisense	Up	226035703	226642772	trans
lnc-MMP23B-3	ATF5	chr19	50431959	50437192	Up	chr1	1590785	1594063	Intron	Up	1290785	1894063	trans
lnc-MMP23B-3	CEBPZ	chr2	37428755	37458856	Up	chr1	1590785	1594063	Intron	Up	1290785	1894063	trans
lnc-MMP23B-3	EIF2A	chr3	150264465	150302029	Up	chr1	1590785	1594063	Intron	Up	1290785	1894063	trans
lnc-MOCS2-3	ATF5	chr19	50431959	50437192	Up	chr5	52410153	52410525	Antisense	Up	52110153	52710525	trans
lnc-MOCS2-3	CEBPZ	chr2	37428755	37458856	Up	chr5	52410153	52410525	Antisense	Up	52110153	52710525	trans
lnc-MOCS2-3	EIF2A	chr3	150264465	150302029	Up	chr5	52410153	52410525	Antisense	Up	52110153	52710525	trans
lnc-MPEG1-2	ATF5	chr19	50431959	50437192	Up	chr11	58897605	58910488	Sense	Up	58597605	59210488	trans
lnc-MPEG1-2	CEBPZ	chr2	37428755	37458856	Up	chr11	58897605	58910488	Sense	Up	58597605	59210488	trans
lnc-MPEG1-2	EIF2A	chr3	150264465	150302029	Up	chr11	58897605	58910488	Sense	Up	58597605	59210488	trans
lnc-MPHOSPH10-2	ATF5	chr19	50431959	50437192	Up	chr2	71409867	71411508	Antisense	Up	71109867	71711508	trans
lnc-MPHOSPH10-2	CEBPZ	chr2	37428755	37458856	Up	chr2	71409867	71411508	Antisense	Up	71109867	71711508	trans
lnc-MPHOSPH10-2	EIF2A	chr3	150264465	150302029	Up	chr2	71409867	71411508	Antisense	Up	71109867	71711508	trans
lnc-MPHOSPH8-4	MCL1	chr1	150547032	150552066	Up	chr13	20248763	20250024	Antisense	Up	19948763	20550024	trans
lnc-MPI-1	ATF5	chr19	50431959	50437192	Up	chr15	75192332	75193030	Antisense	Up	74892332	75493030	trans
lnc-MPI-1	CEBPZ	chr2	37428755	37458856	Up	chr15	75192332	75193030	Antisense	Up	74892332	75493030	trans
lnc-MPI-1	EIF2A	chr3	150264465	150302029	Up	chr15	75192332	75193030	Antisense	Up	74892332	75493030	trans
lnc-MPPE1-3	EIF2AK1	chr7	6061881	6098861	Up	chr18	11851412	11852750	Antisense	Up	11551412	12152750	trans
lnc-MRPL47-2	ATF5	chr19	50431959	50437192	Up	chr3	179301049	179301550	Antisense	Up	179001049	179601550	trans
lnc-MRPL47-2	CEBPZ	chr2	37428755	37458856	Up	chr3	179301049	179301550	Antisense	Up	179001049	179601550	trans
lnc-MRPL47-2	EIF2A	chr3	150264465	150302029	Up	chr3	179301049	179301550	Antisense	Up	179001049	179601550	trans
lnc-MRPS30-8	CASP7	NA	NA	NA	NA	chr5	44826177	44836603	Intergenic	Up	44526177	45136603	trans
lnc-MRPS30-8	SERP1	chr3	150259781	150321015	Up	chr5	44826177	44836603	Intergenic	Up	44526177	45136603	trans
lnc-MTMR2-2	EIF2A	chr3	150264465	150302029	Up	chr11	95554873	95555985	Antisense	Up	95254873	95855985	trans
lnc-MYL12A-1	ATF5	chr19	50431959	50437192	Up	chr18	3190394	3247275	Antisense	Up	2890394	3547275	trans
lnc-MYL12A-1	CEBPZ	chr2	37428755	37458856	Up	chr18	3190394	3247275	Antisense	Up	2890394	3547275	trans
lnc-MYL12A-1	EIF2A	chr3	150264465	150302029	Up	chr18	3190394	3247275	Antisense	Up	2890394	3547275	trans
lnc-NAA50-1	ATF5	chr19	50431959	50437192	Up	chr3	113465718	113466255	Antisense	Up	113165718	113766255	trans
lnc-NAA50-1	CEBPZ	chr2	37428755	37458856	Up	chr3	113465718	113466255	Antisense	Up	113165718	113766255	trans
lnc-NAA50-1	EIF2A	chr3	150264465	150302029	Up	chr3	113465718	113466255	Antisense	Up	113165718	113766255	trans
lnc-NAA60-1	EIF2AK1	chr7	6061881	6098861	Up	chr16	3415098	3535559	Sense	Up	3115098	3835559	trans
lnc-NDUFAF3-1	ATF5	chr19	50431959	50437192	Up	chr3	49066748	49067139	Antisense	Up	48766748	49367139	trans
lnc-NDUFAF3-1	CEBPZ	chr2	37428755	37458856	Up	chr3	49066748	49067139	Antisense	Up	48766748	49367139	trans
lnc-NDUFAF3-1	EIF2A	chr3	150264465	150302029	Up	chr3	49066748	49067139	Antisense	Up	48766748	49367139	trans
lnc-NDUFS6-17	ATF5	chr19	50431959	50437192	Up	chr5	1576658	1589480	Antisense	Up	1276658	1889480	trans
lnc-NDUFS6-17	CEBPZ	chr2	37428755	37458856	Up	chr5	1576658	1589480	Antisense	Up	1276658	1889480	trans
lnc-NEK5-1	ATF5	chr19	50431959	50437192	Up	chr13	52603158	52624034	Antisense	Up	52303158	52924034	trans
lnc-NEK5-1	CEBPZ	chr2	37428755	37458856	Up	chr13	52603158	52624034	Antisense	Up	52303158	52924034	trans
lnc-NEK5-1	EIF2A	chr3	150264465	150302029	Up	chr13	52603158	52624034	Antisense	Up	52303158	52924034	trans
lnc-NEURL4-1	EIF2AK1	chr7	6061881	6098861	Up	chr17	7255368	7258332	Antisense	Up	6955368	7558332	trans
lnc-NFAT5-1	ATF5	chr19	50431959	50437192	Up	chr16	69743776	69744486	Intron	Up	69443776	70044486	trans
lnc-NFAT5-1	CEBPZ	chr2	37428755	37458856	Up	chr16	69743776	69744486	Intron	Up	69443776	70044486	trans
lnc-NFAT5-1	EIF2A	chr3	150264465	150302029	Up	chr16	69743776	69744486	Intron	Up	69443776	70044486	trans
lnc-NFKBIB-5	ATF5	chr19	50431959	50437192	Up	chr19	39342921	39344120	Antisense	Up	39042921	39644120	trans
lnc-NFKBIB-5	CEBPZ	chr2	37428755	37458856	Up	chr19	39342921	39344120	Antisense	Up	39042921	39644120	trans
lnc-NFKBIB-5	EIF2A	chr3	150264465	150302029	Up	chr19	39342921	39344120	Antisense	Up	39042921	39644120	trans
lnc-NID2-5	CEBPZ	chr2	37428755	37458856	Up	chr14	52464892	52466634	Antisense	Up	52164892	52766634	trans
lnc-NIPAL1-2	ATF5	chr19	50431959	50437192	Up	chr4	47841938	47846867	Intron	Up	47541938	48146867	trans
lnc-NIPAL1-2	CEBPZ	chr2	37428755	37458856	Up	chr4	47841938	47846867	Intron	Up	47541938	48146867	trans
lnc-NIPAL1-2	EIF2A	chr3	150264465	150302029	Up	chr4	47841938	47846867	Intron	Up	47541938	48146867	trans
lnc-NIPBL-1	EIF2AK1	chr7	6061881	6098861	Up	chr5	36871456	36876605	Antisense	Up	36571456	37176605	trans
lnc-NKX2-5-2	MCL1	chr1	150547032	150552066	Up	chr5	172571164	172572042	Antisense	Up	172271164	172872042	trans
lnc-NLRP2-2	ATF5	chr19	50431959	50437192	Up	chr19	55517560	55559454	Antisense	Up	55217560	55859454	trans
lnc-NLRP2-2	CEBPZ	chr2	37428755	37458856	Up	chr19	55517560	55559454	Antisense	Up	55217560	55859454	trans
lnc-NLRP2-2	EIF2A	chr3	150264465	150302029	Up	chr19	55517560	55559454	Antisense	Up	55217560	55859454	trans
lnc-NMBR-2	EIF2AK1	chr7	6061881	6098861	Up	chr6	141128739	141219567	Intergenic	Down	140828739	141519567	trans
lnc-NR2F2-7	EIF2AK1	chr7	6061881	6098861	Up	chr15	96533822	96799762	Antisense	Down	96233822	97099762	trans
lnc-NUDT5-1	ATF5	chr19	50431959	50437192	Up	chr10	12286749	12288157	Antisense	Up	11986749	12588157	trans
lnc-NUDT5-1	CEBPZ	chr2	37428755	37458856	Up	chr10	12286749	12288157	Antisense	Up	11986749	12588157	trans
lnc-NUDT5-1	EIF2A	chr3	150264465	150302029	Up	chr10	12286749	12288157	Antisense	Up	11986749	12588157	trans
lnc-OR7C2-1	ATF5	chr19	50431959	50437192	Up	chr19	15050245	16748905	Sense	Up	14750245	17048905	trans
lnc-OR7C2-1	CEBPZ	chr2	37428755	37458856	Up	chr19	15050245	16748905	Sense	Up	14750245	17048905	trans
lnc-OR7C2-1	EIF2A	chr3	150264465	150302029	Up	chr19	15050245	16748905	Sense	Up	14750245	17048905	trans
lnc-OTP-5	ATF5	chr19	50431959	50437192	Up	chr5	76723251	76725632	Antisense	Up	76423251	77025632	trans
lnc-OTP-5	CEBPZ	chr2	37428755	37458856	Up	chr5	76723251	76725632	Antisense	Up	76423251	77025632	trans
lnc-OTP-5	EIF2A	chr3	150264465	150302029	Up	chr5	76723251	76725632	Antisense	Up	76423251	77025632	trans
lnc-OTUD6B-2	CEBPZ	chr2	37428755	37458856	Up	chr8	92075739	92082050	Antisense	Up	91775739	92382050	trans
lnc-OXNAD1-6	EIF2A	chr3	150264465	150302029	Up	chr3	16296575	16300952	Antisense	Up	15996575	16600952	trans
lnc-PCCA-2	EIF2AK1	chr7	6061881	6098861	Up	chr13	100737844	100739356	Intergenic	Up	100437844	101039356	trans
lnc-PCDH12-1	ATF5	chr19	50431959	50437192	Up	chr5	141350201	141362252	Antisense	Up	141050201	141662252	trans
lnc-PCDH12-1	CEBPZ	chr2	37428755	37458856	Up	chr5	141350201	141362252	Antisense	Up	141050201	141662252	trans
lnc-PCDH12-1	EIF2A	chr3	150264465	150302029	Up	chr5	141350201	141362252	Antisense	Up	141050201	141662252	trans
lnc-PCM1-3	ATF5	chr19	50431959	50437192	Up	chr8	17941736	17955160	Sense	Up	17641736	18255160	trans
lnc-PCM1-3	CEBPZ	chr2	37428755	37458856	Up	chr8	17941736	17955160	Sense	Up	17641736	18255160	trans
lnc-PDF-1	XBP1	chr22	29190543	29196585	Up	chr16	69360393	69361625	Intergenic	Up	69060393	69661625	trans
lnc-PDGFRL-2	ATF5	chr19	50431959	50437192	Up	chr8	17491579	17501580	Sense	Up	17191579	17801580	trans
lnc-PDGFRL-2	CEBPZ	chr2	37428755	37458856	Up	chr8	17491579	17501580	Sense	Up	17191579	17801580	trans
lnc-PDGFRL-2	EIF2A	chr3	150264465	150302029	Up	chr8	17491579	17501580	Sense	Up	17191579	17801580	trans
lnc-PER2-5	EIF2AK1	chr7	6061881	6098861	Up	chr2	239359012	239360879	Antisense	Up	239059012	239660879	trans
lnc-PEX14-1	EIF2AK1	chr7	6061881	6098861	Up	chr1	10532344	10596629	Sense	Up	10232344	10896629	trans
lnc-PGBD5-1	EIF2AK1	chr7	6061881	6098861	Up	chr1	230416057	230417639	Antisense	Up	230116057	230717639	trans
lnc-PHYHIP-1	EIF2A	chr3	150264465	150302029	Up	chr8	22110021	22132686	Intergenic	Up	21810021	22432686	trans
lnc-PIGB-2	ATF5	chr19	50431959	50437192	Up	chr15	55456635	55486766	Antisense	Up	55156635	55786766	trans
lnc-PIGB-2	CEBPZ	chr2	37428755	37458856	Up	chr15	55456635	55486766	Antisense	Up	55156635	55786766	trans
lnc-PIGB-2	EIF2A	chr3	150264465	150302029	Up	chr15	55456635	55486766	Antisense	Up	55156635	55786766	trans
lnc-PINK1-2	ATF5	chr19	50431959	50437192	Up	chr1	21069479	21070455	Intron	Up	20769479	21370455	trans
lnc-PINK1-2	CEBPZ	chr2	37428755	37458856	Up	chr1	21069479	21070455	Intron	Up	20769479	21370455	trans
lnc-PINK1-2	EIF2A	chr3	150264465	150302029	Up	chr1	21069479	21070455	Intron	Up	20769479	21370455	trans
lnc-PNLIPRP1-1	ATF5	chr19	50431959	50437192	Up	chr10	118429613	118432250	Antisense	Up	118129613	118732250	trans
lnc-PNLIPRP1-1	CEBPZ	chr2	37428755	37458856	Up	chr10	118429613	118432250	Antisense	Up	118129613	118732250	trans
lnc-PNMA2-1	ATF5	chr19	50431959	50437192	Up	chr8	26222805	26228645	Antisense	Up	25922805	26528645	trans
lnc-PNMA2-1	CEBPZ	chr2	37428755	37458856	Up	chr8	26222805	26228645	Antisense	Up	25922805	26528645	trans
lnc-PNMA2-1	EIF2A	chr3	150264465	150302029	Up	chr8	26222805	26228645	Antisense	Up	25922805	26528645	trans
lnc-PNO1-1	CEBPZ	chr2	37428755	37458856	Up	chr2	68406964	68407664	Intron	Up	68106964	68707664	trans
lnc-PNO1-1	EIF2A	chr3	150264465	150302029	Up	chr2	68406964	68407664	Intron	Up	68106964	68707664	trans
lnc-PODXL-3	CEBPZ	chr2	37428755	37458856	Up	chr7	131178722	131183518	Antisense	Up	130878722	131483518	trans
lnc-POLR1E-4	ATF5	chr19	50431959	50437192	Up	chr9	37511008	37512306	Antisense	Up	37211008	37812306	trans
lnc-POLR1E-4	CEBPZ	chr2	37428755	37458856	Up	chr9	37511008	37512306	Antisense	Up	37211008	37812306	trans
lnc-POLR1E-4	EIF2A	chr3	150264465	150302029	Up	chr9	37511008	37512306	Antisense	Up	37211008	37812306	trans
lnc-POTEM-4	ATF5	chr19	50431959	50437192	Up	chr14	20145802	20147175	Intergenic	Up	19845802	20447175	trans
lnc-PPIAL4C-9	ATF5	chr19	50431959	50437192	Up	chr1	149320440	149375252	Sense	Up	149020440	149675252	trans
lnc-PPIAL4C-9	CEBPZ	chr2	37428755	37458856	Up	chr1	149320440	149375252	Sense	Up	149020440	149675252	trans
lnc-PPIAL4C-9	EIF2A	chr3	150264465	150302029	Up	chr1	149320440	149375252	Sense	Up	149020440	149675252	trans
lnc-PPP1CB-1	EIF2A	chr3	150264465	150302029	Up	chr2	28936167	28948866	Intergenic	Up	28636167	29248866	trans
lnc-PPP1R14B-1	ATF5	chr19	50431959	50437192	Up	chr11	64014410	64016966	Sense	Up	63714410	64316966	trans
lnc-PPP1R14B-1	CEBPZ	chr2	37428755	37458856	Up	chr11	64014410	64016966	Sense	Up	63714410	64316966	trans
lnc-PPP4R1-18	EIF2AK1	chr7	6061881	6098861	Up	chr18	9912312	9914344	Antisense	Up	9612312	10214344	trans
lnc-PTGDR2-1	ATF5	chr19	50431959	50437192	Up	chr11	60609278	60618554	Sense	Up	60309278	60918554	trans
lnc-PTGDR2-1	CEBPZ	chr2	37428755	37458856	Up	chr11	60609278	60618554	Sense	Up	60309278	60918554	trans
lnc-PTPN2-6	MCL1	chr1	150547032	150552066	Up	chr18	12984692	12991172	Antisense	Up	12684692	13291172	trans
lnc-PTRHD1-1	EIF2AK1	chr7	6061881	6098861	Up	chr2	25042237	25043665	Sense	Up	24742237	25343665	trans
lnc-RAD9B-1	EIF2A	chr3	150264465	150302029	Up	chr12	110939418	110956511	Sense	Up	110639418	111256511	trans
lnc-RASAL1-1	ATF5	chr19	50431959	50437192	Up	chr12	113345432	113455556	Antisense	Up	113045432	113755556	trans
lnc-RASAL1-1	CEBPZ	chr2	37428755	37458856	Up	chr12	113345432	113455556	Antisense	Up	113045432	113755556	trans
lnc-RC3H1-1	ATF5	chr19	50431959	50437192	Up	chr1	174083004	174129142	Sense	Up	173783004	174429142	trans
lnc-RC3H1-1	CEBPZ	chr2	37428755	37458856	Up	chr1	174083004	174129142	Sense	Up	173783004	174429142	trans
lnc-RC3H1-1	EIF2A	chr3	150264465	150302029	Up	chr1	174083004	174129142	Sense	Up	173783004	174429142	trans
lnc-REM2-2	EIF2AK1	chr7	6061881	6098861	Up	chr14	23398817	23424771	Sense	Up	23098817	23724771	trans
lnc-REST-4	CASP7	NA	NA	NA	NA	chr4	57826725	57827705	Intergenic	Up	57526725	58127705	trans
lnc-REST-4	SERP1	chr3	150259781	150321015	Up	chr4	57826725	57827705	Intergenic	Up	57526725	58127705	trans
lnc-RLIM-8	MCL1	chr1	150547032	150552066	Up	chrX	73229223	73231303	Intron	Up	72929223	73531303	trans
lnc-RNF113B-2	EIF2AK1	chr7	6061881	6098861	Up	chr13	98674416	98676530	Antisense	Up	98374416	98976530	trans
lnc-RNF121-5	ATF5	chr19	50431959	50437192	Up	chr11	71614239	71615127	Intergenic	Up	71314239	71915127	trans
lnc-RNF149-2	EIF2A	chr3	150264465	150302029	Up	chr2	101635003	101637620	Intron	Up	101335003	101937620	trans
lnc-RPS27L-1	ATF5	chr19	50431959	50437192	Up	chr15	63362223	63364110	Antisense	Up	63062223	63664110	trans
lnc-RPS27L-1	CEBPZ	chr2	37428755	37458856	Up	chr15	63362223	63364110	Antisense	Up	63062223	63664110	trans
lnc-RPS27L-1	EIF2A	chr3	150264465	150302029	Up	chr15	63362223	63364110	Antisense	Up	63062223	63664110	trans
lnc-S100A7A-1	EIF2AK1	chr7	6061881	6098861	Up	chr1	153433283	153441910	Intergenic	Down	153133283	153741910	trans
lnc-S1PR2-2	EIF2AK1	chr7	6061881	6098861	Up	chr19	10369784	10370721	Antisense	Up	10069784	10670721	trans
lnc-SCGB1D4-1	EIF2AK1	chr7	6061881	6098861	Up	chr11	62104382	62105562	Antisense	Up	61804382	62405562	trans
lnc-SCN2A-6	ATF5	chr19	50431959	50437192	Up	chr2	165802126	165947803	Antisense	Up	165502126	166247803	trans
lnc-SEBOX-1	ATF5	chr19	50431959	50437192	Up	chr17	26688622	26689881	Intergenic	Up	26388622	26989881	trans
lnc-SEBOX-1	CEBPZ	chr2	37428755	37458856	Up	chr17	26688622	26689881	Intergenic	Up	26388622	26989881	trans
lnc-SEBOX-1	EIF2A	chr3	150264465	150302029	Up	chr17	26688622	26689881	Intergenic	Up	26388622	26989881	trans
lnc-SETD8-1	ATF5	chr19	50431959	50437192	Up	chr12	123848355	123850334	Antisense	Up	123548355	124150334	trans
lnc-SETD8-1	CEBPZ	chr2	37428755	37458856	Up	chr12	123848355	123850334	Antisense	Up	123548355	124150334	trans
lnc-SETD8-1	EIF2A	chr3	150264465	150302029	Up	chr12	123848355	123850334	Antisense	Up	123548355	124150334	trans
lnc-SH3BGRL2-9	ATF5	chr19	50431959	50437192	Up	chr6	80131798	80228894	Antisense	Up	79831798	80528894	trans
lnc-SH3BGRL2-9	CEBPZ	chr2	37428755	37458856	Up	chr6	80131798	80228894	Antisense	Up	79831798	80528894	trans
lnc-SH3BGRL2-9	EIF2A	chr3	150264465	150302029	Up	chr6	80131798	80228894	Antisense	Up	79831798	80528894	trans
lnc-SH3RF2-1	ATF5	chr19	50431959	50437192	Up	chr5	145478968	145499975	Antisense	Up	145178968	145799975	trans
lnc-SH3RF2-1	CEBPZ	chr2	37428755	37458856	Up	chr5	145478968	145499975	Antisense	Up	145178968	145799975	trans
lnc-SH3RF2-1	EIF2A	chr3	150264465	150302029	Up	chr5	145478968	145499975	Antisense	Up	145178968	145799975	trans
lnc-SHANK2-3	ATF5	chr19	50431959	50437192	Up	chr11	70170976	70173315	Intergenic	Up	69870976	70473315	trans
lnc-SHANK2-3	CEBPZ	chr2	37428755	37458856	Up	chr11	70170976	70173315	Intergenic	Up	69870976	70473315	trans
lnc-SHANK2-3	EIF2A	chr3	150264465	150302029	Up	chr11	70170976	70173315	Intergenic	Up	69870976	70473315	trans
lnc-SHANK2-5	EIF2AK1	chr7	6061881	6098861	Up	chr11	70052396	70053496	Antisense	Up	69752396	70353496	trans
lnc-SLA2-1	ATF5	chr19	50431959	50437192	Up	chr20	35220846	35230365	Intron	Up	34920846	35530365	trans
lnc-SLA2-1	CEBPZ	chr2	37428755	37458856	Up	chr20	35220846	35230365	Intron	Up	34920846	35530365	trans
lnc-SLA2-1	EIF2A	chr3	150264465	150302029	Up	chr20	35220846	35230365	Intron	Up	34920846	35530365	trans
lnc-SLC25A21-4	ATF5	chr19	50431959	50437192	Up	chr14	38064228	38065264	Sense	Up	37764228	38365264	trans
lnc-SLC25A21-4	CEBPZ	chr2	37428755	37458856	Up	chr14	38064228	38065264	Sense	Up	37764228	38365264	trans
lnc-SLC25A21-4	EIF2A	chr3	150264465	150302029	Up	chr14	38064228	38065264	Sense	Up	37764228	38365264	trans
lnc-SLC25A47-5	ATF5	chr19	50431959	50437192	Up	chr14	100745712	100749124	Intergenic	Up	100445712	101049124	trans
lnc-SLC25A47-5	CEBPZ	chr2	37428755	37458856	Up	chr14	100745712	100749124	Intergenic	Up	100445712	101049124	trans
lnc-SLC2A6-2	ATF5	chr19	50431959	50437192	Up	chr9	136330157	136332664	Antisense	Up	136030157	136632664	trans
lnc-SLC2A6-2	EIF2A	chr3	150264465	150302029	Up	chr9	136330157	136332664	Antisense	Up	136030157	136632664	trans
lnc-SLC39A10-10	EIF2AK1	chr7	6061881	6098861	Up	chr2	197035607	197037431	Antisense	Up	196735607	197337431	trans
lnc-SLC3A2-1	EIF2AK1	chr7	6061881	6098861	Up	chr11	62599705	62601515	Antisense	Up	62299705	62901515	trans
lnc-SLC3A2-3	EIF2A	chr3	150264465	150302029	Up	chr11	62619908	62620313	Antisense	Up	62319908	62920313	trans
lnc-SLC46A2-1	ATF5	chr19	50431959	50437192	Up	chr9	115631917	115636827	Antisense	Up	115331917	115936827	trans
lnc-SLC46A2-1	CEBPZ	chr2	37428755	37458856	Up	chr9	115631917	115636827	Antisense	Up	115331917	115936827	trans
lnc-SLC46A2-1	EIF2A	chr3	150264465	150302029	Up	chr9	115631917	115636827	Antisense	Up	115331917	115936827	trans
lnc-SLC4A10-2	EIF2AK1	chr7	6061881	6098861	Up	chr2	162929765	162931679	Antisense	Up	162629765	163231679	trans
lnc-SLC7A6OS-2	EIF2AK1	chr7	6061881	6098861	Up	chr16	68259871	68263048	Sense	Up	67959871	68563048	trans
lnc-SNN-5	EIF2AK1	chr7	6061881	6098861	Up	chr16	11643239	11680147	Antisense	Up	11343239	11980147	trans
lnc-SNTG2-3	ATF5	chr19	50431959	50437192	Up	chr2	677185	697371	Antisense	Up	377185	997371	trans
lnc-SNTG2-3	CEBPZ	chr2	37428755	37458856	Up	chr2	677185	697371	Antisense	Up	377185	997371	trans
lnc-SNTG2-3	EIF2A	chr3	150264465	150302029	Up	chr2	677185	697371	Antisense	Up	377185	997371	trans
lnc-SNX33-1	EIF2AK1	chr7	6061881	6098861	Up	chr15	75928479	75931580	Antisense	Up	75628479	76231580	trans
lnc-SP110-5	ATF5	chr19	50431959	50437192	Up	chr2	231263879	231273488	Antisense	Up	230963879	231573488	trans
lnc-SP110-5	CEBPZ	chr2	37428755	37458856	Up	chr2	231263879	231273488	Antisense	Up	230963879	231573488	trans
lnc-SP110-5	EIF2A	chr3	150264465	150302029	Up	chr2	231263879	231273488	Antisense	Up	230963879	231573488	trans
lnc-SP140-3	EIF2AK1	chr7	6061881	6098861	Up	chr2	230989748	231038939	Antisense	Up	230689748	231338939	trans
lnc-SPATA12-2	CEBPZ	chr2	37428755	37458856	Up	chr3	57112970	57114129	Intergenic	Up	56812970	57414129	trans
lnc-SPATA12-2	EIF2A	chr3	150264465	150302029	Up	chr3	57112970	57114129	Intergenic	Up	56812970	57414129	trans
lnc-SPATA21-3	EIF2AK1	chr7	6061881	6098861	Up	chr1	16781920	16785908	Antisense	Up	16481920	17085908	trans
lnc-SPATA9-1	EIF2AK1	chr7	6061881	6098861	Up	chr5	95036952	95067999	Antisense	Up	94736952	95367999	trans
lnc-SPIN3-5	ATF5	chr19	50431959	50437192	Up	chrX	56311187	56312246	Antisense	Up	56011187	56612246	trans
lnc-SPIN3-5	CEBPZ	chr2	37428755	37458856	Up	chrX	56311187	56312246	Antisense	Up	56011187	56612246	trans
lnc-SPIN3-5	EIF2A	chr3	150264465	150302029	Up	chrX	56311187	56312246	Antisense	Up	56011187	56612246	trans
lnc-SRGAP3-2	EIF2AK1	chr7	6061881	6098861	Up	chr3	9366373	9413338	Antisense	Up	9066373	9713338	trans
lnc-ST7L-1	ATF5	chr19	50431959	50437192	Up	chr1	112957338	112958909	Antisense	Up	112657338	113258909	trans
lnc-ST7L-1	CEBPZ	chr2	37428755	37458856	Up	chr1	112957338	112958909	Antisense	Up	112657338	113258909	trans
lnc-ST7L-1	EIF2A	chr3	150264465	150302029	Up	chr1	112957338	112958909	Antisense	Up	112657338	113258909	trans
lnc-STAG3L4-5	ATF5	chr19	50431959	50437192	Up	chr7	66738713	66742413	Intron	Up	66438713	67042413	trans
lnc-STAG3L4-5	CEBPZ	chr2	37428755	37458856	Up	chr7	66738713	66742413	Intron	Up	66438713	67042413	trans
lnc-STAG3L4-5	EIF2A	chr3	150264465	150302029	Up	chr7	66738713	66742413	Intron	Up	66438713	67042413	trans
lnc-STAP1-12	CEBPZ	chr2	37428755	37458856	Up	chr4	66218273	66241698	Antisense	Up	65918273	66541698	trans
lnc-STAP1-12	EIF2A	chr3	150264465	150302029	Up	chr4	66218273	66241698	Antisense	Up	65918273	66541698	trans
lnc-SZT2-2	EIF2AK1	chr7	6061881	6098861	Up	chr1	43850783	43854826	Antisense	Up	43550783	44154826	trans
lnc-TCTEX1D1-1	SERP1	chr3	150259781	150321015	Up	chr1	67292624	67294241	Antisense	Up	66992624	67594241	trans
lnc-THRSP-2	CEBPZ	chr2	37428755	37458856	Up	chr11	77726760	77727541	Antisense	Up	77426760	78027541	trans
lnc-THRSP-2	EIF2A	chr3	150264465	150302029	Up	chr11	77726760	77727541	Antisense	Up	77426760	78027541	trans
lnc-THSD4-4	ATF5	chr19	50431959	50437192	Up	chr15	72110736	72115947	Intergenic	Up	71810736	72415947	trans
lnc-THSD4-4	CEBPZ	chr2	37428755	37458856	Up	chr15	72110736	72115947	Intergenic	Up	71810736	72415947	trans
lnc-THSD4-4	EIF2A	chr3	150264465	150302029	Up	chr15	72110736	72115947	Intergenic	Up	71810736	72415947	trans
lnc-THUMPD3-4	EIF2AK1	chr7	6061881	6098861	Up	chr3	9429770	9432288	Antisense	Up	9129770	9732288	trans
lnc-TM2D2-1	ATF5	chr19	50431959	50437192	Up	chr8	38827878	38830530	Antisense	Up	38527878	39130530	trans
lnc-TM2D2-1	CEBPZ	chr2	37428755	37458856	Up	chr8	38827878	38830530	Antisense	Up	38527878	39130530	trans
lnc-TM2D2-1	EIF2A	chr3	150264465	150302029	Up	chr8	38827878	38830530	Antisense	Up	38527878	39130530	trans
lnc-TMC5-1	CEBPZ	chr2	37428755	37458856	Up	chr16	19513010	19513608	Antisense	Up	19213010	19813608	trans
lnc-TMC5-1	EIF2A	chr3	150264465	150302029	Up	chr16	19513010	19513608	Antisense	Up	19213010	19813608	trans
lnc-TMEM156-1	ATF5	chr19	50431959	50437192	Up	chr4	39114296	39128438	Intron	Up	38814296	39428438	trans
lnc-TMEM156-1	CEBPZ	chr2	37428755	37458856	Up	chr4	39114296	39128438	Intron	Up	38814296	39428438	trans
lnc-TMEM156-1	EIF2A	chr3	150264465	150302029	Up	chr4	39114296	39128438	Intron	Up	38814296	39428438	trans
lnc-TMEM194B-6	ATF5	chr19	50431959	50437192	Up	chr2	191533493	191535668	Antisense	Up	191233493	191835668	trans
lnc-TMEM194B-6	CEBPZ	chr2	37428755	37458856	Up	chr2	191533493	191535668	Antisense	Up	191233493	191835668	trans
lnc-TMEM194B-6	EIF2A	chr3	150264465	150302029	Up	chr2	191533493	191535668	Antisense	Up	191233493	191835668	trans
lnc-TMEM22-2	ATF5	chr19	50431959	50437192	Up	chr3	136537488	136562164	Sense	Up	136237488	136862164	trans
lnc-TMEM22-2	CEBPZ	chr2	37428755	37458856	Up	chr3	136537488	136562164	Sense	Up	136237488	136862164	trans
lnc-TMEM22-2	EIF2A	chr3	150264465	150302029	Up	chr3	136537488	136562164	Sense	Up	136237488	136862164	trans
lnc-TMEM240-1	SERP1	chr3	150259781	150321015	Up	chr1	1497725	1499904	Intron	Up	1197725	1799904	trans
lnc-TMEM50B-2	ATF5	chr19	50431959	50437192	Up	chr21	34804791	34821717	Sense	Up	34504791	35121717	trans
lnc-TMEM50B-2	CEBPZ	chr2	37428755	37458856	Up	chr21	34804791	34821717	Sense	Up	34504791	35121717	trans
lnc-TMEM50B-2	EIF2A	chr3	150264465	150302029	Up	chr21	34804791	34821717	Sense	Up	34504791	35121717	trans
lnc-TMEM75-8	ATF5	chr19	50431959	50437192	Up	chr8	128767771	128815392	Antisense	Down	128467771	129115392	trans
lnc-TMEM75-8	CEBPZ	chr2	37428755	37458856	Up	chr8	128767771	128815392	Antisense	Down	128467771	129115392	trans
lnc-TMEM85-2	ATF5	chr19	50431959	50437192	Up	chr15	34530519	34564617	Antisense	Up	34230519	34864617	trans
lnc-TMEM85-2	CEBPZ	chr2	37428755	37458856	Up	chr15	34530519	34564617	Antisense	Up	34230519	34864617	trans
lnc-TMEM98-2	EIF2AK1	chr7	6061881	6098861	Up	chr17	31203776	31233602	Antisense	Up	30903776	31533602	trans
lnc-TNNT1-1	EIF2AK1	chr7	6061881	6098861	Up	chr19	55622743	55626884	Sense	Down	55322743	55926884	trans
lnc-TOR1AIP1-2	EIF2AK1	chr7	6061881	6098861	Up	chr1	179831572	179833589	Intron	Up	179531572	180133589	trans
lnc-TRAFD1-1	EIF2AK1	chr7	6061881	6098861	Up	chr12	112694603	112696895	Intergenic	Up	112394603	112996895	trans
lnc-TRIM6-TRIM34-1	EIF2AK1	chr7	6061881	6098861	Up	chr11	5664411	5687610	Antisense	Up	5364411	5987610	trans
lnc-TSPAN18-2	EIF2AK1	chr7	6061881	6098861	Up	chr11	44951561	44956152	Sense	Up	44651561	45256152	trans
lnc-TSPYL4-1	ATF5	chr19	50431959	50437192	Up	chr6	116565349	116565891	Intergenic	Up	116265349	116865891	trans
lnc-TSPYL4-1	CEBPZ	chr2	37428755	37458856	Up	chr6	116565349	116565891	Intergenic	Up	116265349	116865891	trans
lnc-TSPYL4-1	EIF2A	chr3	150264465	150302029	Up	chr6	116565349	116565891	Intergenic	Up	116265349	116865891	trans
lnc-TUBGCP4-1	ATF5	chr19	50431959	50437192	Up	chr15	43661418	43668822	Sense	Up	43361418	43968822	trans
lnc-TUBGCP4-1	CEBPZ	chr2	37428755	37458856	Up	chr15	43661418	43668822	Sense	Up	43361418	43968822	trans
lnc-TUBGCP4-1	EIF2A	chr3	150264465	150302029	Up	chr15	43661418	43668822	Sense	Up	43361418	43968822	trans
lnc-TUBGCP6-5	ATF5	chr19	50431959	50437192	Up	chr22	50637518	50638976	Antisense	Up	50337518	50938976	trans
lnc-TUBGCP6-5	CEBPZ	chr2	37428755	37458856	Up	chr22	50637518	50638976	Antisense	Up	50337518	50938976	trans
lnc-TUBGCP6-5	EIF2A	chr3	150264465	150302029	Up	chr22	50637518	50638976	Antisense	Up	50337518	50938976	trans
lnc-TULP4-1	MCL1	chr1	150547032	150552066	Up	chr6	158703294	158733691	Intergenic	Up	158403294	159033691	trans
lnc-UGP2-4	ATF5	chr19	50431959	50437192	Up	chr2	64309105	64333464	Antisense	Up	64009105	64633464	trans
lnc-UGP2-4	CEBPZ	chr2	37428755	37458856	Up	chr2	64309105	64333464	Antisense	Up	64009105	64633464	trans
lnc-UGP2-4	EIF2A	chr3	150264465	150302029	Up	chr2	64309105	64333464	Antisense	Up	64009105	64633464	trans
lnc-ULBP3-5	EIF2AK1	chr7	6061881	6098861	Up	chr6	150825946	150831436	Intergenic	Down	150525946	151131436	trans
lnc-UMODL1-7	ATF5	chr19	50431959	50437192	Up	chr21	43305203	43305960	Antisense	Up	43005203	43605960	trans
lnc-UMODL1-7	CEBPZ	chr2	37428755	37458856	Up	chr21	43305203	43305960	Antisense	Up	43005203	43605960	trans
lnc-USP50-1	ATF5	chr19	50431959	50437192	Up	chr15	50789391	50790941	Antisense	Up	50489391	51090941	trans
lnc-USP50-1	CEBPZ	chr2	37428755	37458856	Up	chr15	50789391	50790941	Antisense	Up	50489391	51090941	trans
lnc-USP50-1	EIF2A	chr3	150264465	150302029	Up	chr15	50789391	50790941	Antisense	Up	50489391	51090941	trans
lnc-VN1R2-3	ATF5	chr19	50431959	50437192	Up	chr19	53743927	53745166	Intron	Up	53443927	54045166	trans
lnc-VN1R2-3	CEBPZ	chr2	37428755	37458856	Up	chr19	53743927	53745166	Intron	Up	53443927	54045166	trans
lnc-VN1R2-3	EIF2A	chr3	150264465	150302029	Up	chr19	53743927	53745166	Intron	Up	53443927	54045166	trans
lnc-WDR73-7	EIF2AK1	chr7	6061881	6098861	Up	chr15	85177460	85197472	Sense	Up	84877460	85497472	trans
lnc-WDR77-2	EIF2A	chr3	150264465	150302029	Up	chr1	112004683	112012086	Intergenic	Up	111704683	112312086	trans
lnc-XPOT-4	EIF2AK1	chr7	6061881	6098861	Up	chr12	64784475	64790835	Intergenic	Down	64484475	65090835	trans
lnc-YIF1A-4	ATF5	chr19	50431959	50437192	Up	chr11	66032247	66033137	Antisense	Up	65732247	66333137	trans
lnc-YIF1A-4	CEBPZ	chr2	37428755	37458856	Up	chr11	66032247	66033137	Antisense	Up	65732247	66333137	trans
lnc-YIF1A-4	EIF2A	chr3	150264465	150302029	Up	chr11	66032247	66033137	Antisense	Up	65732247	66333137	trans
lnc-ZBTB25-2	ATF5	chr19	50431959	50437192	Up	chr14	64889652	64915275	Antisense	Up	64589652	65215275	trans
lnc-ZBTB25-2	CEBPZ	chr2	37428755	37458856	Up	chr14	64889652	64915275	Antisense	Up	64589652	65215275	trans
lnc-ZBTB25-2	EIF2A	chr3	150264465	150302029	Up	chr14	64889652	64915275	Antisense	Up	64589652	65215275	trans
lnc-ZBTB37-2	EIF2AK1	chr7	6061881	6098861	Up	chr1	173834366	173835344	Antisense	Up	173534366	174135344	trans
lnc-ZCCHC24-7	EIF2AK1	chr7	6061881	6098861	Up	chr10	81058518	81061950	Antisense	Up	80758518	81361950	trans
lnc-ZFAND1-1	EIF2AK1	chr7	6061881	6098861	Up	chr8	82626674	82645138	Sense	Up	82326674	82945138	trans
lnc-ZNF101-4	MCL1	chr1	150547032	150552066	Up	chr19	19821996	19822691	Intron	Up	19521996	20122691	trans
lnc-ZNF181-2	EIF2AK1	chr7	6061881	6098861	Up	chr19	35258274	35258584	Antisense	Up	34958274	35558584	trans
lnc-ZNF213-2	EIF2AK1	chr7	6061881	6098861	Up	chr16	3175529	3184830	Antisense	Up	2875529	3484830	trans
lnc-ZNF235-2	CEBPZ	chr2	37428755	37458856	Up	chr19	44660661	44682394	Antisense	Up	44360661	44982394	trans
lnc-ZNF235-2	EIF2A	chr3	150264465	150302029	Up	chr19	44660661	44682394	Antisense	Up	44360661	44982394	trans
lnc-ZNF257-5	ATF5	chr19	50431959	50437192	Up	chr19	22025859	22026637	Antisense	Up	21725859	22326637	trans
lnc-ZNF257-5	CEBPZ	chr2	37428755	37458856	Up	chr19	22025859	22026637	Antisense	Up	21725859	22326637	trans
lnc-ZNF257-5	EIF2A	chr3	150264465	150302029	Up	chr19	22025859	22026637	Antisense	Up	21725859	22326637	trans
lnc-ZNF44-1	ATF5	chr19	50431959	50437192	Up	chr19	12335510	12348964	Intergenic	Up	12035510	12648964	trans
lnc-ZNF44-1	CEBPZ	chr2	37428755	37458856	Up	chr19	12335510	12348964	Intergenic	Up	12035510	12648964	trans
lnc-ZNF45-4	ATF5	chr19	50431959	50437192	Up	chr19	44598502	44603864	Antisense	Up	44298502	44903864	trans
lnc-ZNF45-4	CEBPZ	chr2	37428755	37458856	Up	chr19	44598502	44603864	Antisense	Up	44298502	44903864	trans
lnc-ZNF460-2	MCL1	chr1	150547032	150552066	Up	chr19	57815672	57819930	Intergenic	Up	57515672	58119930	trans
lnc-ZNF506-2	ATF5	chr19	50431959	50437192	Up	chr19	19945685	20008579	Antisense	Up	19645685	20308579	trans
lnc-ZNF506-2	CEBPZ	chr2	37428755	37458856	Up	chr19	19945685	20008579	Antisense	Up	19645685	20308579	trans
lnc-ZNF506-2	EIF2A	chr3	150264465	150302029	Up	chr19	19945685	20008579	Antisense	Up	19645685	20308579	trans
lnc-ZNF613-7	EIF2A	chr3	150264465	150302029	Up	chr19	52550186	52553075	Antisense	Up	52250186	52853075	trans
lnc-ZNF681-2	ATF5	chr19	50431959	50437192	Up	chr19	24101882	24141028	Antisense	Up	23801882	24441028	trans
lnc-ZNF681-2	EIF2A	chr3	150264465	150302029	Up	chr19	24101882	24141028	Antisense	Up	23801882	24441028	trans
lnc-ZNF687-1	EIF2A	chr3	150264465	150302029	Up	chr1	151313123	151314442	Antisense	Up	151013123	151614442	trans
lnc-ZNF701-2	EIF2A	chr3	150264465	150302029	Up	chr19	53300916	53453256	Antisense	Up	53000916	53753256	trans
lnc-ZNF724P-2	EIF2AK1	chr7	6061881	6098861	Up	chr19	23171058	23207156	Sense	Down	22871058	23507156	trans
lnc-ZNF738-5	ATF5	chr19	50431959	50437192	Up	chr19	21458356	21477566	Antisense	Up	21158356	21777566	trans
lnc-ZNF738-5	CEBPZ	chr2	37428755	37458856	Up	chr19	21458356	21477566	Antisense	Up	21158356	21777566	trans
lnc-ZNF738-5	EIF2A	chr3	150264465	150302029	Up	chr19	21458356	21477566	Antisense	Up	21158356	21777566	trans
lnc-ZNF780B-1	EIF2A	chr3	150264465	150302029	Up	chr19	40519720	40522954	Antisense	Up	40219720	40822954	trans
lnc-ZNF791-10	MCL1	chr1	150547032	150552066	Up	chr19	12500862	12542068	Antisense	Up	12200862	12842068	trans
lnc-ZNF83-6	EIF2A	chr3	150264465	150302029	Up	chr19	53057603	53064515	Antisense	Up	52757603	53364515	trans
lnc-ZSCAN21-1	ATF5	chr19	50431959	50437192	Up	chr7	99667610	99669423	Antisense	Up	99367610	99969423	trans
lnc-ZSCAN21-1	EIF2A	chr3	150264465	150302029	Up	chr7	99667610	99669423	Antisense	Up	99367610	99969423	trans
MCCC1-AS1	ATF5	chr19	50431959	50437192	Up	chr3	182734042	182735420	Antisense	Up	182434042	183035420	trans
MCCC1-AS1	CEBPZ	chr2	37428755	37458856	Up	chr3	182734042	182735420	Antisense	Up	182434042	183035420	trans
MCCC1-AS1	EIF2A	chr3	150264465	150302029	Up	chr3	182734042	182735420	Antisense	Up	182434042	183035420	trans
MRVI1-AS1	EIF2AK1	chr7	6061881	6098861	Up	chr11	10562669	10621479	Sense	Up	10262669	10921479	trans
MYCBP2-AS1	EIF2A	chr3	150264465	150302029	Up	chr13	77526999	77661913	Sense	Up	77226999	77961913	trans
MYLK-AS1	ATF5	chr19	50431959	50437192	Up	chr3	123303543	123331503	Sense	Up	123003543	123631503	trans
MYLK-AS1	CEBPZ	chr2	37428755	37458856	Up	chr3	123303543	123331503	Sense	Up	123003543	123631503	trans
MYLK-AS1	EIF2A	chr3	150264465	150302029	Up	chr3	123303543	123331503	Sense	Up	123003543	123631503	trans
NCBP2-AS1	ATF5	chr19	50431959	50437192	Up	chr3	196666747	196669405	Antisense	Up	196366747	196969405	trans
NCBP2-AS1	CEBPZ	chr2	37428755	37458856	Up	chr3	196666747	196669405	Antisense	Up	196366747	196969405	trans
NCBP2-AS1	EIF2A	chr3	150264465	150302029	Up	chr3	196666747	196669405	Antisense	Up	196366747	196969405	trans
OIP5-AS1	SERP1	chr3	150259781	150321015	Up	chr15	41576218	41598729	Sense	Up	41276218	41898729	trans
RAP2C-AS1	ATF5	chr19	50431959	50437192	Up	chrX	131351174	131566890	Sense	Up	131051174	131866890	trans
RAP2C-AS1	CEBPZ	chr2	37428755	37458856	Up	chrX	131351174	131566890	Sense	Up	131051174	131866890	trans
RAP2C-AS1	EIF2A	chr3	150264465	150302029	Up	chrX	131351174	131566890	Sense	Up	131051174	131866890	trans
RRM1-AS1	MCL1	chr1	150547032	150552066	Up	chr11	4158345	4159487	Antisense	Up	3858345	4459487	trans
SEMA3F-AS1	EIF2AK1	chr7	6061881	6098861	Up	chr3	50153454	50193518	Antisense	Up	49853454	50493518	trans
WDFY3-AS2	ATP2A1	chr16	28889726	28915830	Up	chr4	85887428	85932430	Sense	Up	85587428	86232430	trans
XLOC_000090	EIF2AK1	chr7	6061881	6098861	Up	chr1	1623957	1631019	Antisense	Up	1323957	1931019	trans
XLOC_000300	ATF5	chr19	50431959	50437192	Up	chr1	9981301	9996504	Antisense	Up	9681301	10296504	trans
XLOC_000300	CEBPZ	chr2	37428755	37458856	Up	chr1	9981301	9996504	Antisense	Up	9681301	10296504	trans
XLOC_000300	EIF2A	chr3	150264465	150302029	Up	chr1	9981301	9996504	Antisense	Up	9681301	10296504	trans
XLOC_005400	EIF2AK1	chr7	6061881	6098861	Up	chr1	43703332	43736469	Antisense	Up	43403332	44036469	trans
XLOC_006773	EIF2AK1	chr7	6061881	6098861	Up	chr1	151740650	151742132	Intron	Up	151440650	152042132	trans
XLOC_1013783	EIF2AK1	chr7	6061881	6098861	Up	chr17	7366399	7366827	Intron	Up	7066399	7666827	trans
XLOC_1174749	SERP1	chr3	150259781	150321015	Up	chr19	22023260	22023787	Intron	Up	21723260	22323787	trans
XLOC_1175795	ATF5	chr19	50431959	50437192	Up	chr19	53400800	53401223	Intergenic	Up	53100800	53701223	trans
XLOC_1175795	CEBPZ	chr2	37428755	37458856	Up	chr19	53400800	53401223	Intergenic	Up	53100800	53701223	trans
XLOC_1176066	ATF5	chr19	50431959	50437192	Up	chr19	58413438	58415914	Intergenic	Up	58113438	58715914	trans
XLOC_1176066	CEBPZ	chr2	37428755	37458856	Up	chr19	58413438	58415914	Intergenic	Up	58113438	58715914	trans
XLOC_1176066	EIF2A	chr3	150264465	150302029	Up	chr19	58413438	58415914	Intergenic	Up	58113438	58715914	trans
XLOC_1176619	ATF5	chr19	50431959	50437192	Up	chr19	12191284	12191594	Intergenic	Up	11891284	12491594	trans
XLOC_1176619	CEBPZ	chr2	37428755	37458856	Up	chr19	12191284	12191594	Intergenic	Up	11891284	12491594	trans
XLOC_1176619	EIF2A	chr3	150264465	150302029	Up	chr19	12191284	12191594	Intergenic	Up	11891284	12491594	trans
XLOC_1232514	ATF5	chr19	50431959	50437192	Up	chr2	206984758	206986312	Intergenic	Up	206684758	207286312	trans
XLOC_1232514	CEBPZ	chr2	37428755	37458856	Up	chr2	206984758	206986312	Intergenic	Up	206684758	207286312	trans
XLOC_1232514	EIF2A	chr3	150264465	150302029	Up	chr2	206984758	206986312	Intergenic	Up	206684758	207286312	trans
XLOC_1233735	MCL1	chr1	150547032	150552066	Up	chr2	37328282	37329349	Intergenic	Up	37028282	37629349	trans
XLOC_1236338	EIF2AK1	chr7	6061881	6098861	Up	chr2	235888035	235888815	Intron	Up	235588035	236188815	trans
XLOC_1483332	ATF5	chr19	50431959	50437192	Up	chr20	35407641	35408687	Intron	Up	35107641	35708687	trans
XLOC_1483332	CEBPZ	chr2	37428755	37458856	Up	chr20	35407641	35408687	Intron	Up	35107641	35708687	trans
XLOC_1483332	EIF2A	chr3	150264465	150302029	Up	chr20	35407641	35408687	Intron	Up	35107641	35708687	trans
XLOC_1484828	ATF5	chr19	50431959	50437192	Up	chr20	56288017	56289630	Intergenic	Up	55988017	56589630	trans
XLOC_1484828	CEBPZ	chr2	37428755	37458856	Up	chr20	56288017	56289630	Intergenic	Up	55988017	56589630	trans
XLOC_1484828	EIF2A	chr3	150264465	150302029	Up	chr20	56288017	56289630	Intergenic	Up	55988017	56589630	trans
XLOC_1622484	ATF5	chr19	50431959	50437192	Up	chr3	131753200	131791654	Intergenic	Up	131453200	132091654	trans
XLOC_1622484	CEBPZ	chr2	37428755	37458856	Up	chr3	131753200	131791654	Intergenic	Up	131453200	132091654	trans
XLOC_1622484	EIF2A	chr3	150264465	150302029	Up	chr3	131753200	131791654	Intergenic	Up	131453200	132091654	trans
XLOC_1623353	ATF5	chr19	50431959	50437192	Up	chr3	196158279	196196945	Antisense	Up	195858279	196496945	trans
XLOC_1623353	CEBPZ	chr2	37428755	37458856	Up	chr3	196158279	196196945	Antisense	Up	195858279	196496945	trans
XLOC_1623353	EIF2A	chr3	150264465	150302029	Up	chr3	196158279	196196945	Antisense	Up	195858279	196496945	trans
XLOC_1623520	EIF2AK1	chr7	6061881	6098861	Up	chr3	10163725	10192940	Antisense	Up	9863725	10492940	trans
XLOC_1625271	CEBPZ	chr2	37428755	37458856	Up	chr3	155656185	155657811	Intergenic	Up	155356185	155957811	trans
XLOC_1625271	EIF2A	chr3	150264465	150302029	Up	chr3	155656185	155657811	Intergenic	Up	155356185	155957811	trans
XLOC_1829151	MCL1	chr1	150547032	150552066	Up	chr4	95657510	95678631	Antisense	Up	95357510	95978631	trans
XLOC_2029264	EIF2AK1	chr7	6061881	6098861	Up	chr5	54565415	54566493	Antisense	Up	54265415	54866493	trans
XLOC_2217616	BCL2L11	chr2	111876955	111926024	Up	chr6	42896771	42908131	Sense	Up	42596771	43208131	trans
XLOC_2220896	ATF5	chr19	50431959	50437192	Up	chr6	138659836	138691564	Intergenic	Up	138359836	138991564	trans
XLOC_2220896	CEBPZ	chr2	37428755	37458856	Up	chr6	138659836	138691564	Intergenic	Up	138359836	138991564	trans
XLOC_236009	SERP1	chr3	150259781	150321015	Up	chr10	75007669	75011429	Sense	Up	74707669	75311429	trans
XLOC_2394807	EIF2AK1	chr7	6061881	6098861	Up	chr7	130999402	131011671	Antisense	Up	130699402	131311671	trans
XLOC_2559906	EIF2A	chr3	150264465	150302029	Up	chr8	19247250	19250859	Antisense	Up	18947250	19550859	trans
XLOC_2836451	ERN1	NA	NA	NA	NA	chrUn	67871	68188	Intergenic	Down	-232129	368188	trans
XLOC_2837916	EIF2AK1	chr7	6061881	6098861	Up	chrUn	12508	13576	Intergenic	Down	-287492	313576	trans
XLOC_375822	ATF5	chr19	50431959	50437192	Up	chr11	58803853	58849514	Intergenic	Up	58503853	59149514	trans
XLOC_375822	CEBPZ	chr2	37428755	37458856	Up	chr11	58803853	58849514	Intergenic	Up	58503853	59149514	trans
XLOC_375822	EIF2A	chr3	150264465	150302029	Up	chr11	58803853	58849514	Intergenic	Up	58503853	59149514	trans
XLOC_376348	ATF5	chr19	50431959	50437192	Up	chr11	73582285	73583065	Intergenic	Up	73282285	73883065	trans
XLOC_376348	CEBPZ	chr2	37428755	37458856	Up	chr11	73582285	73583065	Intergenic	Up	73282285	73883065	trans
XLOC_376348	EIF2A	chr3	150264465	150302029	Up	chr11	73582285	73583065	Intergenic	Up	73282285	73883065	trans
XLOC_514233	CEBPZ	chr2	37428755	37458856	Up	chr12	53432901	53435908	Sense	Up	53132901	53735908	trans
XLOC_514590	MCL1	chr1	150547032	150552066	Up	chr12	72181596	72182817	Intergenic	Up	71881596	72482817	trans
XLOC_515758	EIF2AK1	chr7	6061881	6098861	Up	chr12	6602776	6603162	Intergenic	Up	6302776	6903162	trans
XLOC_516712	ATF5	chr19	50431959	50437192	Up	chr12	64843908	64844178	Intergenic	Up	64543908	65144178	trans
XLOC_516712	CEBPZ	chr2	37428755	37458856	Up	chr12	64843908	64844178	Intergenic	Up	64543908	65144178	trans
XLOC_516712	EIF2A	chr3	150264465	150302029	Up	chr12	64843908	64844178	Intergenic	Up	64543908	65144178	trans
XLOC_753260	SERP1	chr3	150259781	150321015	Up	chr14	67997262	67998570	Intergenic	Up	67697262	68298570	trans
XLOC_753553	ATF5	chr19	50431959	50437192	Up	chr14	92226229	92227380	Intergenic	Up	91926229	92527380	trans
XLOC_753553	CEBPZ	chr2	37428755	37458856	Up	chr14	92226229	92227380	Intergenic	Up	91926229	92527380	trans
XLOC_753553	EIF2A	chr3	150264465	150302029	Up	chr14	92226229	92227380	Intergenic	Up	91926229	92527380	trans
XLOC_753555	BCL2L11	chr2	111876955	111926024	Up	chr14	92234709	92235444	Intergenic	Up	91934709	92535444	trans
XLOC_754873	ATF5	chr19	50431959	50437192	Up	chr14	76237789	76240483	Antisense	Up	75937789	76540483	trans
XLOC_754873	CEBPZ	chr2	37428755	37458856	Up	chr14	76237789	76240483	Antisense	Up	75937789	76540483	trans
XLOC_754873	EIF2A	chr3	150264465	150302029	Up	chr14	76237789	76240483	Antisense	Up	75937789	76540483	trans
XLOC_845645	EIF2A	chr3	150264465	150302029	Up	chr15	45777911	45778155	Intron	Up	45477911	46078155	trans
XLOC_846032	MCL1	chr1	150547032	150552066	Up	chr15	72117662	72118354	Intergenic	Up	71817662	72418354	trans
XLOC_847555	EIF2A	chr3	150264465	150302029	Up	chr15	68480009	68482493	Antisense	Up	68180009	68782493	trans
XLOC_934016	EIF2AK1	chr7	6061881	6098861	Up	chr16	81031932	81040619	Sense	Up	80731932	81340619	trans
ZNF571-AS1	ATF5	chr19	50431959	50437192	Up	chr19	38037567	38078249	Sense	Up	37737567	38378249	trans
ZSCAN16-AS1	ATF5	chr19	50431959	50437192	Up	chr6	28058877	28105094	Sense	Up	27758877	28405094	trans
ZSCAN16-AS1	CEBPZ	chr2	37428755	37458856	Up	chr6	28058877	28105094	Sense	Up	27758877	28405094	trans
