# Supplementary material for: LncRNAs induce oxidative stress and spermatogenesis by regulating endoplasmic reticulum genes and pathways
Source: Aging (Albany NY). 2021 May 6;13(10):13764–87. doi: 10.18632/aging.202971 (PMC8202879; doi:10.18632/aging.202971)
Supplement: Supplementary Table 17 [file aging-13-202971-s017.csv]

Supplementary Table 17. cis_trans_OX.
lncrna	mrna	chr_mrna	start_mrna	end_mrna	diff_mrna	chr_lncrna	start_lncrna	end_lncrna	sub_lncrna	diff_lncrna	uplim	downlim	regulation
ARHGEF19-AS1	SOD1	chr21	33031935	33041244	Up	chr1	16524348	16524852	Antisense	Up	16224348	16824852	trans
ARSD-AS1	TXN2	chr22	36863083	36878077	Up	chrX	2822944	2824122	Intron	Up	2522944	3124122	trans
CHKB-AS1	NCF2	chr1	183524698	183560011	Down	chr22	51021408	51038732	Sense	Down	50721408	51338732	trans
CNOT10-AS1	TXN2	chr22	36863083	36878077	Up	chr3	32772126	32778946	Antisense	Up	32472126	33078946	trans
EVX1-AS	GCLC	chr6	53362139	53481768	Up	chr7	27278861	27286848	Sense	Up	26978861	27586848	trans
FOXP1-AS1	SOD1	chr21	33031935	33041244	Up	chr3	71338907	71359918	Antisense	Up	71038907	71659918	trans
IDH1-AS1	GCLC	chr6	53362139	53481768	Up	chr2	209119956	209120918	Sense	Up	208819956	209420918	trans
LINC00905	NCF2	chr1	183524698	183560011	Down	chr19	16142116	16147295	Sense	Down	15842116	16447295	trans
LINC01102	NCF2	chr1	183524698	183560011	Down	chr2	105049724	105137290	Sense	Down	104749724	105437290	trans
lnc-AARS-1	TXN2	chr22	36863083	36878077	Up	chr16	70349542	70380650	Sense	Up	70049542	70680650	trans
lnc-ABCD3-1	NCF1C	chr7	74572445	74587848	Down	chr1	95007515	95008786	Intergenic	Down	94707515	95308786	trans
lnc-AC002553.1-1	GCLC	chr6	53362139	53481768	Up	chr17	15943785	15944587	Antisense	Up	15643785	16244587	trans
lnc-AC007390.5.1-4	TXN2	chr22	36863083	36878077	Up	chr2	37375672	37376447	Antisense	Up	37075672	37676447	trans
lnc-AC010336.2-1	GCLC	chr6	53362139	53481768	Up	chr19	7971110	7974758	Antisense	Up	7671110	8274758	trans
lnc-AC018816.3.1-11	TXN2	chr22	36863083	36878077	Up	chr3	4725382	4752120	Antisense	Up	4425382	5052120	trans
lnc-AC079341.1-10	GCLC	chr6	53362139	53481768	Up	chr4	121843096	121844760	Antisense	Up	121543096	122144760	trans
lnc-AC091132.1-3	HMOX2	chr16	4524691	4560348	Up	chr17	43623169	43640596	Intergenic	Up	43323169	43940596	trans
lnc-AC092295.7.1-2	NCF1C	chr7	74572445	74587848	Down	chr19	37001926	37005584	Intron	Up	36701926	37305584	trans
lnc-AC127496.3-7	GCLC	chr6	53362139	53481768	Up	chr17	78914217	78915833	Intergenic	Up	78614217	79215833	trans
lnc-AC127496.3-7	SP1	chr12	53773960	53810230	Up	chr17	78914217	78915833	Intergenic	Up	78614217	79215833	trans
lnc-ADC-1	SOD2	chr6	160090089	160183561	Up	chr1	33452552	33498070	Antisense	Up	33152552	33798070	trans
lnc-AF127577.1-3	TXN2	chr22	36863083	36878077	Up	chr21	16333629	16336554	Antisense	Up	16033629	16636554	trans
lnc-AGMAT-4	GCLC	chr6	53362139	53481768	Up	chr1	15892105	15892451	Antisense	Up	15592105	16192451	trans
lnc-ALG2-6	NCF2	chr1	183524698	183560011	Down	chr9	102117618	102139522	Sense	Down	101817618	102439522	trans
lnc-ALPK2-6	TXN2	chr22	36863083	36878077	Up	chr18	56419410	56421130	Intergenic	Up	56119410	56721130	trans
lnc-ALX4-5	GCLC	chr6	53362139	53481768	Up	chr11	43851258	43902276	Antisense	Up	43551258	44202276	trans
lnc-AMDHD1-3	GCLC	chr6	53362139	53481768	Up	chr12	96429136	96441430	Antisense	Up	96129136	96741430	trans
lnc-ANGPT2-2	TXN2	chr22	36863083	36878077	Up	chr8	6261076	6264663	Sense	Up	5961076	6564663	trans
lnc-ANGPTL2-1	TXN2	chr22	36863083	36878077	Up	chr9	129976313	129984186	Intergenic	Up	129676313	130284186	trans
lnc-ANKMY2-1	GCLC	chr6	53362139	53481768	Up	chr7	16735495	16759523	Antisense	Up	16435495	17059523	trans
lnc-ANKRD27-6	TXN2	chr22	36863083	36878077	Up	chr19	33169525	33180166	Intergenic	Up	32869525	33480166	trans
lnc-ANKS6-1	GCLC	chr6	53362139	53481768	Up	chr9	101609510	101634697	Antisense	Up	101309510	101934697	trans
lnc-AP005482.1.1-2	HMOX2	chr16	4524691	4560348	Up	chr18	12658736	12686490	Sense	Up	12358736	12986490	trans
lnc-AP1S2-1	GCLC	chr6	53362139	53481768	Up	chrX	15801327	15802658	Antisense	Up	15501327	16102658	trans
lnc-AP3S1-4	TXN2	chr22	36863083	36878077	Up	chr5	114937843	114956356	Sense	Up	114637843	115256356	trans
lnc-AP4E1-1	TXN2	chr22	36863083	36878077	Up	chr15	51038905	51042026	Antisense	Up	50738905	51342026	trans
lnc-ARHGAP32-4	HMOX2	chr16	4524691	4560348	Up	chr11	129317899	129321731	Antisense	Up	129017899	129621731	trans
lnc-ARL13A-1	HMOX2	chr16	4524691	4560348	Up	chrX	100258820	100262956	Intergenic	Up	99958820	100562956	trans
lnc-ATM-1	GCLC	chr6	53362139	53481768	Up	chr11	108368841	108373612	Antisense	Up	108068841	108673612	trans
lnc-ATP11B-6	TXN2	chr22	36863083	36878077	Up	chr3	182655945	182657951	Antisense	Up	182355945	182957951	trans
lnc-ATP6V1C2-4	TXN2	chr22	36863083	36878077	Up	chr2	10938337	10942757	Antisense	Up	10638337	11242757	trans
lnc-B3GAT1-2	NCF2	chr1	183524698	183560011	Down	chr11	134815477	134846593	Intergenic	Down	134515477	135146593	trans
lnc-B4GALT7-1	MAPK14	chr6	35995488	36079013	Up	chr5	177038142	177047505	Antisense	Up	176738142	177347505	trans
lnc-BLNK-4	HMOX2	chr16	4524691	4560348	Up	chr10	97888811	97890249	Antisense	Up	97588811	98190249	trans
lnc-BTLA-4	FOXM1	NA	NA	NA	NA	chr3	112130090	112179627	Intergenic	Down	111830090	112479627	trans
lnc-C10orf28-2	XDH	chr2	31557187	31637581	Down	chr10	100028224	100032135	Intergenic	Down	99728224	100332135	trans
lnc-C11orf49-3	TXN2	chr22	36863083	36878077	Up	chr11	47196407	47196619	Antisense	Up	46896407	47496619	trans
lnc-C11orf74-7	NCF2	chr1	183524698	183560011	Down	chr11	38668025	38708253	Sense	Down	38368025	39008253	trans
lnc-C15orf48-1	MAPK14	chr6	35995488	36079013	Up	chr15	45740624	45811862	Sense	Up	45440624	46111862	trans
lnc-C16orf58-5	HMOX2	chr16	4524691	4560348	Up	chr16	31720433	31723305	Intergenic	Up	31420433	32023305	trans
lnc-C16orf61-1	HMOX2	chr16	4524691	4560348	Up	chr16	81050396	81069364	Antisense	Up	80750396	81369364	trans
lnc-C17orf104-1	NCF1C	chr7	74572445	74587848	Down	chr17	42754343	42765386	Antisense	Up	42454343	43065386	trans
lnc-C18orf62-1	FOXM1	NA	NA	NA	NA	chr18	73144657	73167436	Intergenic	Down	72844657	73467436	trans
lnc-C1orf124-1	SOD2	chr6	160090089	160183561	Up	chr1	231464487	231467017	Intergenic	Up	231164487	231767017	trans
lnc-C1orf132-1	SOD1	chr21	33031935	33041244	Up	chr1	207974862	208042495	Sense	Down	207674862	208342495	trans
lnc-C1S-1	GCLC	chr6	53362139	53481768	Up	chr12	7087682	7089103	Antisense	Up	6787682	7389103	trans
lnc-C20orf187-1	TXN2	chr22	36863083	36878077	Up	chr20	10653575	10982411	Antisense	Down	10353575	11282411	trans
lnc-C2CD4A-9	SOD1	chr21	33031935	33041244	Up	chr15	62211489	62211739	Antisense	Up	61911489	62511739	trans
lnc-C2orf18-1	NCF2	chr1	183524698	183560011	Down	chr2	26928413	26931548	Intron	Down	26628413	27231548	trans
lnc-C3orf17-2	TXN2	chr22	36863083	36878077	Up	chr3	112709293	112710000	Antisense	Up	112409293	113010000	trans
lnc-C4orf34-3	SOD1	chr21	33031935	33041244	Up	chr4	39548920	39551206	Intron	Up	39248920	39851206	trans
lnc-C5orf27-4	NCF1C	chr7	74572445	74587848	Down	chr5	95213691	95221593	Antisense	Up	94913691	95521593	trans
lnc-C6orf105-5	MAPK14	chr6	35995488	36079013	Up	chr6	12007816	12009073	Intergenic	Up	11707816	12309073	trans
lnc-C9orf57-3	GCLC	chr6	53362139	53481768	Up	chr9	74598216	74600973	Intergenic	Up	74298216	74900973	trans
lnc-CCL27-1	TXN2	chr22	36863083	36878077	Up	chr9	34661876	34666171	Sense	Up	34361876	34966171	trans
lnc-CD151-2	TXN2	chr22	36863083	36878077	Up	chr11	838179	839831	Sense	Up	538179	1139831	trans
lnc-CD2BP2-1	SOD1	chr21	33031935	33041244	Up	chr16	30370096	30371497	Sense	Up	30070096	30671497	trans
lnc-CD80-2	MAPK14	chr6	35995488	36079013	Up	chr3	119298058	119298497	Antisense	Up	118998058	119598497	trans
lnc-CDH11-2	NCF2	chr1	183524698	183560011	Down	chr16	65224875	65310258	Intergenic	Down	64924875	65610258	trans
lnc-CDK12-2	TXN2	chr22	36863083	36878077	Up	chr17	37558045	37562486	Antisense	Up	37258045	37862486	trans
lnc-CDYL-10	NCF2	chr1	183524698	183560011	Down	chr6	4633461	4639582	Intergenic	Down	4333461	4939582	trans
lnc-CHAC1-4	GCLC	chr6	53362139	53481768	Up	chr15	41309004	41320091	Antisense	Up	41009004	41620091	trans
lnc-CHADL-3	TXN2	chr22	36863083	36878077	Up	chr22	41565193	41579148	Antisense	Up	41265193	41879148	trans
lnc-CHRNA3-5	GCLC	chr6	53362139	53481768	Up	chr15	78792407	78792890	Antisense	Up	78492407	79092890	trans
lnc-CHRNA9-2	GCLC	chr6	53362139	53481768	Up	chr4	40428135	40429602	Intron	Up	40128135	40729602	trans
lnc-CKS1B-2	SOD1	chr21	33031935	33041244	Up	chr1	154934300	154935099	Antisense	Up	154634300	155235099	trans
lnc-CLMP-8	XDH	chr2	31557187	31637581	Down	chr11	123237667	123243374	Intergenic	Down	122937667	123543374	trans
lnc-COBL-2	NCF2	chr1	183524698	183560011	Down	chr7	52232930	52260609	Intergenic	Down	51932930	52560609	trans
lnc-COIL-2	TXN2	chr22	36863083	36878077	Up	chr17	55148882	55162434	Intergenic	Up	54848882	55462434	trans
lnc-CPM-2	GCLC	chr6	53362139	53481768	Up	chr12	69068150	69081535	Sense	Up	68768150	69381535	trans
lnc-CPSF4-1	SOD2	chr6	160090089	160183561	Up	chr7	99070557	99079949	Sense	Up	98770557	99379949	trans
lnc-CREG1-2	GCLC	chr6	53362139	53481768	Up	chr1	167426619	167427898	Intron	Up	167126619	167727898	trans
lnc-CRHR1-5	TXN2	chr22	36863083	36878077	Up	chr17	43596137	43596388	Antisense	Up	43296137	43896388	trans
lnc-CSMD1-18	HMOX2	chr16	4524691	4560348	Up	chr8	1906703	1909149	Antisense	Up	1606703	2209149	trans
lnc-CST7-1	GSR	NA	NA	NA	NA	chr20	24911271	24913594	Intergenic	Up	24611271	25213594	trans
lnc-CTRB1-2	SP1	chr12	53773960	53810230	Up	chr16	75170863	75263637	Sense	Up	74870863	75563637	trans
lnc-CYP2C18-1	NCF2	chr1	183524698	183560011	Down	chr10	96372043	96373661	Intergenic	Down	96072043	96673661	trans
lnc-CYS1-5	TXN2	chr22	36863083	36878077	Up	chr2	10194547	10194993	Antisense	Up	9894547	10494993	trans
lnc-DDX19B-2	HMOX2	chr16	4524691	4560348	Up	chr16	70273802	70282018	Intergenic	Up	69973802	70582018	trans
lnc-DDX27-3	HMOX2	chr16	4524691	4560348	Up	chr20	47785507	47790864	Antisense	Up	47485507	48090864	trans
lnc-DHRS7B-1	NCF2	chr1	183524698	183560011	Down	chr17	21117643	21133348	Antisense	Down	20817643	21433348	trans
lnc-DLX2-3	MAPK14	chr6	35995488	36079013	Up	chr2	173328989	173330750	Antisense	Up	173028989	173630750	trans
lnc-DYNC1I1-5	TXN2	chr22	36863083	36878077	Up	chr7	95746499	95750754	Antisense	Up	95446499	96050754	trans
lnc-DYSF-12	GCLC	chr6	53362139	53481768	Up	chr2	72402068	72405839	Intergenic	Up	72102068	72705839	trans
lnc-EEF1A1-1	TXN2	chr22	36863083	36878077	Up	chr6	74201747	74202465	Antisense	Up	73901747	74502465	trans
lnc-EEF1B2-2	GCLC	chr6	53362139	53481768	Up	chr2	206949328	206952412	Antisense	Up	206649328	207252412	trans
lnc-EEF1B2-3	TXN2	chr22	36863083	36878077	Up	chr2	206854308	206865582	Antisense	Up	206554308	207165582	trans
lnc-EGR4-2	TXN2	chr22	36863083	36878077	Up	chr2	73674657	73678809	Antisense	Up	73374657	73978809	trans
lnc-ESD-1	GCLC	chr6	53362139	53481768	Up	chr13	47297465	47379493	Antisense	Up	46997465	47679493	trans
lnc-FABP3-1	GCLC	chr6	53362139	53481768	Up	chr1	31805913	31819646	Antisense	Up	31505913	32119646	trans
lnc-FABP3-3	TXN2	chr22	36863083	36878077	Up	chr1	31849908	31850331	Intergenic	Up	31549908	32150331	trans
lnc-FAM102B-2	TXN2	chr22	36863083	36878077	Up	chr1	109201326	109202665	Antisense	Up	108901326	109502665	trans
lnc-FAM164C-2	HMOX2	chr16	4524691	4560348	Up	chr14	75548827	75549988	Antisense	Up	75248827	75849988	trans
lnc-FAM190B-4	NCF2	chr1	183524698	183560011	Down	chr10	86322394	86325040	Intergenic	Down	86022394	86625040	trans
lnc-FAM43A-2	TXN2	chr22	36863083	36878077	Up	chr3	194353651	194366130	Antisense	Up	194053651	194666130	trans
lnc-FAM82A1-10	TXN2	chr22	36863083	36878077	Up	chr2	38522792	38523984	Intron	Up	38222792	38823984	trans
lnc-FAM96B-3	GCLC	chr6	53362139	53481768	Up	chr16	66978562	66978999	Antisense	Up	66678562	67278999	trans
lnc-FAT2-1	TXN2	chr22	36863083	36878077	Up	chr5	150870772	150871937	Antisense	Up	150570772	151171937	trans
lnc-FBXL3-1	GPX4	chr19	1103936	1106787	Up	chr13	77564116	77601220	Antisense	Up	77264116	77901220	trans
lnc-FBXL3-1	GSR	NA	NA	NA	NA	chr13	77564116	77601220	Antisense	Up	77264116	77901220	trans
lnc-FBXL3-1	SOD2	chr6	160090089	160183561	Up	chr13	77564116	77601220	Antisense	Up	77264116	77901220	trans
lnc-FDFT1-1	TXN2	chr22	36863083	36878077	Up	chr8	11701602	11702070	Intron	Up	11401602	12002070	trans
lnc-FGF4-1	FOXM1	NA	NA	NA	NA	chr11	69596402	69599143	Intergenic	Down	69296402	69899143	trans
lnc-FKBP2-1	TXN2	chr22	36863083	36878077	Up	chr11	64013435	64015689	Antisense	Up	63713435	64315689	trans
lnc-FLNB-3	SOD2	chr6	160090089	160183561	Up	chr3	57886575	57887872	Intron	Up	57586575	58187872	trans
lnc-FMN1-2	TXN2	chr22	36863083	36878077	Up	chr15	33527752	33539797	Sense	Down	33227752	33839797	trans
lnc-FOXM1-1	GCLC	chr6	53362139	53481768	Up	chr12	3048888	3050025	Antisense	Up	2748888	3350025	trans
lnc-FREM3-2	SOD1	chr21	33031935	33041244	Up	chr4	144476234	144476736	Intergenic	Up	144176234	144776736	trans
lnc-GABARAPL2-4	FOXM1	NA	NA	NA	NA	chr16	75708249	75712036	Intergenic	Down	75408249	76012036	trans
lnc-GADD45A-2	TXN2	chr22	36863083	36878077	Up	chr1	68944811	68949222	Antisense	Up	68644811	69249222	trans
lnc-GARS-2	MAPK14	chr6	35995488	36079013	Up	chr7	30586781	30590397	Antisense	Up	30286781	30890397	trans
lnc-GCC2-1	TXN2	chr22	36863083	36878077	Up	chr2	109128382	109128606	Intergenic	Up	108828382	109428606	trans
lnc-GJA10-8	NCF2	chr1	183524698	183560011	Down	chr6	90586262	90586597	Intergenic	Down	90286262	90886597	trans
lnc-GK-3	GCLC	chr6	53362139	53481768	Up	chrX	31115793	31187673	Antisense	Up	30815793	31487673	trans
lnc-GLDN-2	SOD1	chr21	33031935	33041244	Up	chr15	51749482	51752779	Antisense	Up	51449482	52052779	trans
lnc-GLUD1-2	SOD1	chr21	33031935	33041244	Up	chr10	88769541	88775539	Antisense	Up	88469541	89075539	trans
lnc-GNS-3	TXN2	chr22	36863083	36878077	Up	chr12	65089970	65090330	Intergenic	Up	64789970	65390330	trans
lnc-GPR101-3	NCF2	chr1	183524698	183560011	Down	chrX	135998785	136079662	Intergenic	Down	135698785	136379662	trans
lnc-GPR160-1	GCLC	chr6	53362139	53481768	Up	chr3	169805597	169807378	Antisense	Up	169505597	170107378	trans
lnc-GPR37L1-2	GPX4	chr19	1103936	1106787	Up	chr1	202101762	202102716	Antisense	Up	201801762	202402716	trans
lnc-GPR37L1-2	SOD1	chr21	33031935	33041244	Up	chr1	202101762	202102716	Antisense	Up	201801762	202402716	trans
lnc-GPRC5D-1	GCLC	chr6	53362139	53481768	Up	chr12	13128248	13132729	Intron	Up	12828248	13432729	trans
lnc-GRAMD2-1	SOD1	chr21	33031935	33041244	Up	chr15	72432844	72447800	Antisense	Up	72132844	72747800	trans
lnc-GTPBP1-1	TXN2	chr22	36863083	36878077	Up	chr22	39130729	39134770	Antisense	Up	38830729	39434770	trans
lnc-HAAO-1	SOD2	chr6	160090089	160183561	Up	chr2	43028633	43038968	Intergenic	Up	42728633	43338968	trans
lnc-HCN3-1	SP1	chr12	53773960	53810230	Up	chr1	155232235	155233382	Antisense	Up	154932235	155533382	trans
lnc-HERC6-1	NCF2	chr1	183524698	183560011	Down	chr4	89282460	89291616	Intergenic	Down	88982460	89591616	trans
lnc-HOXB4-1	NCF2	chr1	183524698	183560011	Down	chr17	46656991	46659621	Sense	Down	46356991	46959621	trans
lnc-HSPG2-1	TXN2	chr22	36863083	36878077	Up	chr1	22350486	22357707	Sense	Up	22050486	22657707	trans
lnc-IARS2-2	HMOX2	chr16	4524691	4560348	Up	chr1	220206305	220224929	Antisense	Up	219906305	220524929	trans
lnc-ID4-2	TXN2	chr22	36863083	36878077	Up	chr6	19538727	19539166	Intergenic	Up	19238727	19839166	trans
lnc-IFT46-1	NCF1C	chr7	74572445	74587848	Down	chr11	118382625	118401809	Sense	Up	118082625	118701809	trans
lnc-IGFBP7-1	TXN2	chr22	36863083	36878077	Up	chr4	57896938	57931769	Sense	Up	57596938	58231769	trans
lnc-IKZF2-9	GCLC	chr6	53362139	53481768	Up	chr2	214149141	214150635	Antisense	Up	213849141	214450635	trans
lnc-IL2RG-4	TXN2	chr22	36863083	36878077	Up	chrX	70320133	70334750	Sense	Up	70020133	70634750	trans
lnc-IL31RA-1	TXN2	chr22	36863083	36878077	Up	chr5	55231970	55237555	Intron	Up	54931970	55537555	trans
lnc-IL37-4	NCF2	chr1	183524698	183560011	Down	chr2	113597904	113601772	Intergenic	Down	113297904	113901772	trans
lnc-ILK-1	NFKB1	chr4	103422486	103538459	Up	chr11	6640020	6640995	Antisense	Up	6340020	6940995	trans
lnc-ILKAP-4	HMOX2	chr16	4524691	4560348	Up	chr2	238998758	239000269	Antisense	Up	238698758	239300269	trans
lnc-ILKAP-4	TXN2	chr22	36863083	36878077	Up	chr2	238998758	239000269	Antisense	Up	238698758	239300269	trans
lnc-IQCG-6	HMOX2	chr16	4524691	4560348	Up	chr3	197614093	197615086	Intergenic	Up	197314093	197915086	trans
lnc-IRF2BP2-4	NCF2	chr1	183524698	183560011	Down	chr1	234756939	234792964	Antisense	Down	234456939	235092964	trans
lnc-KB-1980E6.3.1-6	HMOX2	chr16	4524691	4560348	Up	chr8	103268619	103270049	Antisense	Up	102968619	103570049	trans
lnc-KB-1980E6.3.1-6	TXN2	chr22	36863083	36878077	Up	chr8	103268619	103270049	Antisense	Up	102968619	103570049	trans
lnc-KCTD4-1	GCLC	chr6	53362139	53481768	Up	chr13	45693999	45695288	Antisense	Up	45393999	45995288	trans
lnc-KDM4C-18	SOD1	chr21	33031935	33041244	Up	chr9	9442059	9442347	Intergenic	Up	9142059	9742347	trans
lnc-KIAA0020-7	SP1	chr12	53773960	53810230	Up	chr9	2192966	2193572	Antisense	Up	1892966	2493572	trans
lnc-KIAA0196-5	SP1	chr12	53773960	53810230	Up	chr8	126016111	126021316	Antisense	Up	125716111	126321316	trans
lnc-KIAA1429-6	TXN2	chr22	36863083	36878077	Up	chr8	95718688	95720871	Antisense	Up	95418688	96020871	trans
lnc-KIDINS220-11	NCF2	chr1	183524698	183560011	Down	chr2	8998976	9002606	Sense	Down	8698976	9302606	trans
lnc-KLHL25-12	SP1	chr12	53773960	53810230	Up	chr15	86203987	86206591	Intron	Up	85903987	86506591	trans
lnc-KLHL25-6	GCLC	chr6	53362139	53481768	Up	chr15	86122095	86123409	Antisense	Up	85822095	86423409	trans
lnc-LALBA-1	SOD2	chr6	160090089	160183561	Up	chr12	48877069	48894744	Antisense	Up	48577069	49194744	trans
lnc-LAT2-2	TXN2	chr22	36863083	36878077	Up	chr7	73645995	73646353	Intron	Up	73345995	73946353	trans
lnc-LEPRE1-1	TXN2	chr22	36863083	36878077	Up	chr1	43241468	43250520	Intergenic	Up	42941468	43550520	trans
lnc-LIPG-2	GCLC	chr6	53362139	53481768	Up	chr18	47013708	47018248	Sense	Up	46713708	47318248	trans
lnc-LIPG-2	SP1	chr12	53773960	53810230	Up	chr18	47013708	47018248	Sense	Up	46713708	47318248	trans
lnc-LOXL1-1	HMOX2	chr16	4524691	4560348	Up	chr15	74209525	74211786	Antisense	Up	73909525	74511786	trans
lnc-LPIN2-1	TXN2	chr22	36863083	36878077	Up	chr18	2688561	2833063	Antisense	Up	2388561	3133063	trans
lnc-LPP-7	NCF2	chr1	183524698	183560011	Down	chr3	188902847	188932896	Sense	Down	188602847	189232896	trans
lnc-LRRC1-5	HMOX2	chr16	4524691	4560348	Up	chr6	53367982	53371717	Antisense	Up	53067982	53671717	trans
lnc-LRRC1-5	TXN2	chr22	36863083	36878077	Up	chr6	53367982	53371717	Antisense	Up	53067982	53671717	trans
lnc-LSG1-4	TXN2	chr22	36863083	36878077	Up	chr3	194308601	194310910	Intron	Up	194008601	194610910	trans
lnc-LTBR-6	TXN2	chr22	36863083	36878077	Up	chr12	6472666	6479967	Antisense	Up	6172666	6779967	trans
lnc-LXN-1	TXN2	chr22	36863083	36878077	Up	chr3	158261843	158288858	Sense	Up	157961843	158588858	trans
lnc-MESDC1-2	NCF2	chr1	183524698	183560011	Down	chr15	81353293	81355829	Intergenic	Down	81053293	81655829	trans
lnc-MEST-2	GCLC	chr6	53362139	53481768	Up	chr7	130147500	130148123	Antisense	Up	129847500	130448123	trans
lnc-MFSD2A-1	GCLC	chr6	53362139	53481768	Up	chr1	40363416	40364770	Intron	Up	40063416	40664770	trans
lnc-MFSD8-1	GPX4	chr19	1103936	1106787	Up	chr4	128761352	128765195	Intergenic	Up	128461352	129065195	trans
lnc-MFSD8-1	SOD1	chr21	33031935	33041244	Up	chr4	128761352	128765195	Intergenic	Up	128461352	129065195	trans
lnc-MFSD8-1	SOD2	chr6	160090089	160183561	Up	chr4	128761352	128765195	Intergenic	Up	128461352	129065195	trans
lnc-MFSD9-4	TXN2	chr22	36863083	36878077	Up	chr2	102789080	102798568	Antisense	Up	102489080	103098568	trans
lnc-MKLN1-1	MAPK14	chr6	35995488	36079013	Up	chr7	130565957	130794396	Sense	Up	130265957	131094396	trans
lnc-MMP15-1	TXN2	chr22	36863083	36878077	Up	chr16	58150788	58153257	Antisense	Up	57850788	58453257	trans
lnc-MOCS2-3	GCLC	chr6	53362139	53481768	Up	chr5	52410153	52410525	Antisense	Up	52110153	52710525	trans
lnc-MPEG1-2	GCLC	chr6	53362139	53481768	Up	chr11	58897605	58910488	Sense	Up	58597605	59210488	trans
lnc-MPHOSPH8-4	SOD1	chr21	33031935	33041244	Up	chr13	20248763	20250024	Antisense	Up	19948763	20550024	trans
lnc-MRPL40-4	NCF1C	chr7	74572445	74587848	Down	chr22	19444025	19444485	Antisense	Up	19144025	19744485	trans
lnc-MRPS11-2	MAPK14	chr6	35995488	36079013	Up	chr15	89004468	89009180	Antisense	Up	88704468	89309180	trans
lnc-MRPS27-1	NCF2	chr1	183524698	183560011	Down	chr5	71393373	71404109	Antisense	Down	71093373	71704109	trans
lnc-MRPS30-8	GSR	NA	NA	NA	NA	chr5	44826177	44836603	Intergenic	Up	44526177	45136603	trans
lnc-MRPS30-8	SOD2	chr6	160090089	160183561	Up	chr5	44826177	44836603	Intergenic	Up	44526177	45136603	trans
lnc-MRPS5-14	NCF2	chr1	183524698	183560011	Down	chr2	95453468	95472197	Sense	Down	95153468	95772197	trans
lnc-MUC20-10	TXN2	chr22	36863083	36878077	Up	chr3	195689157	195690563	Antisense	Up	195389157	195990563	trans
lnc-MYL12A-1	GCLC	chr6	53362139	53481768	Up	chr18	3190394	3247275	Antisense	Up	2890394	3547275	trans
lnc-MZT2B-1	TXN2	chr22	36863083	36878077	Up	chr2	130887193	130896990	Sense	Up	130587193	131196990	trans
lnc-NAA50-1	GCLC	chr6	53362139	53481768	Up	chr3	113465718	113466255	Antisense	Up	113165718	113766255	trans
lnc-NCKAP1-1	GPX4	chr19	1103936	1106787	Up	chr2	183948132	183973247	Antisense	Up	183648132	184273247	trans
lnc-NCKAP1-1	SOD2	chr6	160090089	160183561	Up	chr2	183948132	183973247	Antisense	Up	183648132	184273247	trans
lnc-NDE1-3	TXN2	chr22	36863083	36878077	Up	chr16	15702330	15704420	Antisense	Up	15402330	16004420	trans
lnc-NDUFAF2-1	TXN2	chr22	36863083	36878077	Up	chr5	60213316	60215400	Antisense	Up	59913316	60515400	trans
lnc-NDUFS1-2	NFKB1	chr4	103422486	103538459	Up	chr2	206980284	206982288	Sense	Up	206680284	207282288	trans
lnc-NDUFS6-17	GCLC	chr6	53362139	53481768	Up	chr5	1576658	1589480	Antisense	Up	1276658	1889480	trans
lnc-NFAT5-1	GCLC	chr6	53362139	53481768	Up	chr16	69743776	69744486	Intron	Up	69443776	70044486	trans
lnc-NFKBIB-5	GCLC	chr6	53362139	53481768	Up	chr19	39342921	39344120	Antisense	Up	39042921	39644120	trans
lnc-NFYB-2	FOXM1	NA	NA	NA	NA	chr12	104852872	104862733	Intron	Down	104552872	105162733	trans
lnc-NIN-1	NCF2	chr1	183524698	183560011	Down	chr14	51350293	51353947	Antisense	Down	51050293	51653947	trans
lnc-NKX2-5-2	SOD1	chr21	33031935	33041244	Up	chr5	172571164	172572042	Antisense	Up	172271164	172872042	trans
lnc-NKX3-1-2	SOD1	chr21	33031935	33041244	Up	chr8	23492388	23493020	Intergenic	Up	23192388	23793020	trans
lnc-NLRP2-2	GCLC	chr6	53362139	53481768	Up	chr19	55517560	55559454	Antisense	Up	55217560	55859454	trans
lnc-NPHS2-3	TXN2	chr22	36863083	36878077	Up	chr1	179560010	179561522	Antisense	Up	179260010	179861522	trans
lnc-NRIP1-2	FOXM1	NA	NA	NA	NA	chr21	16741803	16999459	Intergenic	Down	16441803	17299459	trans
lnc-NRIP2-1	NCF1C	chr7	74572445	74587848	Down	chr12	2906042	2922068	Antisense	Up	2606042	3222068	trans
lnc-NUDT6-3	NCF2	chr1	183524698	183560011	Down	chr4	123803032	123811236	Antisense	Down	123503032	124111236	trans
lnc-ODZ1-6	TXN2	chr22	36863083	36878077	Up	chrX	123235613	123236403	Antisense	Up	122935613	123536403	trans
lnc-OR7C2-1	GCLC	chr6	53362139	53481768	Up	chr19	15050245	16748905	Sense	Up	14750245	17048905	trans
lnc-ORC4-1	TXN2	chr22	36863083	36878077	Up	chr2	148656969	148660525	Antisense	Up	148356969	148960525	trans
lnc-PARN-14	NCF2	chr1	183524698	183560011	Down	chr16	13932034	13936993	Intergenic	Down	13632034	14236993	trans
lnc-PCDH1-5	NCF2	chr1	183524698	183560011	Down	chr5	141134500	141211356	Intergenic	Down	140834500	141511356	trans
lnc-PCM1-3	GCLC	chr6	53362139	53481768	Up	chr8	17941736	17955160	Sense	Up	17641736	18255160	trans
lnc-PHLDB1-1	TXN2	chr22	36863083	36878077	Up	chr11	118575315	118620973	Antisense	Up	118275315	118920973	trans
lnc-PI4KA-2	TXN2	chr22	36863083	36878077	Up	chr22	21243493	21245502	Antisense	Up	20943493	21545502	trans
lnc-PIGB-2	GCLC	chr6	53362139	53481768	Up	chr15	55456635	55486766	Antisense	Up	55156635	55786766	trans
lnc-PIGL-1	TXN2	chr22	36863083	36878077	Up	chr17	16229798	16250988	Antisense	Up	15929798	16550988	trans
lnc-PIGU-3	TXN2	chr22	36863083	36878077	Up	chr20	33097347	33097815	Intergenic	Up	32797347	33397815	trans
lnc-PIGY-5	NCF1C	chr7	74572445	74587848	Down	chr4	89341504	89364068	Antisense	Up	89041504	89664068	trans
lnc-PKP4-4	NCF2	chr1	183524698	183560011	Down	chr2	159276466	159281815	Intron	Down	158976466	159581815	trans
lnc-PLXND1-2	MAPK14	chr6	35995488	36079013	Up	chr3	129222569	129226395	Antisense	Up	128922569	129526395	trans
lnc-PNMA2-1	GCLC	chr6	53362139	53481768	Up	chr8	26222805	26228645	Antisense	Up	25922805	26528645	trans
lnc-POC1B-GALNT4-2	TXN2	chr22	36863083	36878077	Up	chr12	89932992	89941782	Intergenic	Up	89632992	90241782	trans
lnc-POLH-1	TXN2	chr22	36863083	36878077	Up	chr6	43529608	43530156	Antisense	Up	43229608	43830156	trans
lnc-POTEB-5	TXN2	chr22	36863083	36878077	Up	chr15	22541115	22546063	Intergenic	Down	22241115	22846063	trans
lnc-POTEF-4	XDH	chr2	31557187	31637581	Down	chr2	130324222	130351825	Intergenic	Down	130024222	130651825	trans
lnc-POTEM-4	GCLC	chr6	53362139	53481768	Up	chr14	20145802	20147175	Intergenic	Up	19845802	20447175	trans
lnc-PPFIA3-2	SOD1	chr21	33031935	33041244	Up	chr19	49653214	49654278	Sense	Up	49353214	49954278	trans
lnc-PPIAL4G-5	NOXA1	NA	NA	NA	NA	chr1	143211627	143240439	Intergenic	Down	142911627	143540439	trans
lnc-PPP1R14B-1	TXN2	chr22	36863083	36878077	Up	chr11	64014410	64016966	Sense	Up	63714410	64316966	trans
lnc-PPP1R26-1	TXN2	chr22	36863083	36878077	Up	chr9	138359933	138364095	Antisense	Up	138059933	138664095	trans
lnc-PRDM4-4	MAPK14	chr6	35995488	36079013	Up	chr12	108003810	108011498	Antisense	Up	107703810	108311498	trans
lnc-PSMC1-1	TXN2	chr22	36863083	36878077	Up	chr14	90755300	90755730	Intron	Up	90455300	91055730	trans
lnc-PTEN-12	NFKB1	chr4	103422486	103538459	Up	chr10	89577684	89579020	Sense	Up	89277684	89879020	trans
lnc-PTGDR2-1	GCLC	chr6	53362139	53481768	Up	chr11	60609278	60618554	Sense	Up	60309278	60918554	trans
lnc-PTGER4-4	TXN2	chr22	36863083	36878077	Up	chr5	40756151	40763126	Antisense	Up	40456151	41063126	trans
lnc-PTPN2-6	SOD1	chr21	33031935	33041244	Up	chr18	12984692	12991172	Antisense	Up	12684692	13291172	trans
lnc-PXDC1-12	NCF1C	chr7	74572445	74587848	Down	chr6	3848164	3865272	Antisense	Up	3548164	4165272	trans
lnc-RAI1-1	TXN2	chr22	36863083	36878077	Up	chr17	17494741	17513799	Antisense	Up	17194741	17813799	trans
lnc-RAPH1-6	TXN2	chr22	36863083	36878077	Up	chr2	204102133	204104694	Antisense	Up	203802133	204404694	trans
lnc-RARS-2	NCF2	chr1	183524698	183560011	Down	chr5	168133571	168147889	Antisense	Down	167833571	168447889	trans
lnc-RB1-2	TXN2	chr22	36863083	36878077	Up	chr13	49106975	49107897	Antisense	Up	48806975	49407897	trans
lnc-RBM10-1	MAPK14	chr6	35995488	36079013	Up	chrX	46985167	46991582	Intergenic	Up	46685167	47291582	trans
lnc-REST-4	GPX4	chr19	1103936	1106787	Up	chr4	57826725	57827705	Intergenic	Up	57526725	58127705	trans
lnc-REST-4	SOD1	chr21	33031935	33041244	Up	chr4	57826725	57827705	Intergenic	Up	57526725	58127705	trans
lnc-RG9MTD1-4	NCF2	chr1	183524698	183560011	Down	chr3	101076135	101078086	Intron	Down	100776135	101378086	trans
lnc-RGS18-6	HMOX2	chr16	4524691	4560348	Up	chr1	190234027	190331400	Antisense	Up	189934027	190631400	trans
lnc-RHOQ-1	TXN2	chr22	36863083	36878077	Up	chr2	46768944	46803388	Sense	Up	46468944	47103388	trans
lnc-RHOQ-2	TXN2	chr22	36863083	36878077	Up	chr2	46762834	46768609	Intergenic	Up	46462834	47068609	trans
lnc-RIMS3-2	TXN2	chr22	36863083	36878077	Up	chr1	40981425	40982846	Antisense	Up	40681425	41282846	trans
lnc-RIOK1-2	NCF2	chr1	183524698	183560011	Down	chr6	7183315	7185520	Intron	Down	6883315	7485520	trans
lnc-RIPK2-2	TXN2	chr22	36863083	36878077	Up	chr8	90627188	90627723	Intergenic	Up	90327188	90927723	trans
lnc-RLIM-8	SOD1	chr21	33031935	33041244	Up	chrX	73229223	73231303	Intron	Up	72929223	73531303	trans
lnc-RNF121-5	GCLC	chr6	53362139	53481768	Up	chr11	71614239	71615127	Intergenic	Up	71314239	71915127	trans
lnc-RNF149-2	HMOX2	chr16	4524691	4560348	Up	chr2	101635003	101637620	Intron	Up	101335003	101937620	trans
lnc-RNF213-1	SOD1	chr21	33031935	33041244	Up	chr17	78358672	78363688	Intron	Up	78058672	78663688	trans
lnc-RP11-116D17.1.1-10	TXN2	chr22	36863083	36878077	Up	chr12	116398991	116400538	Intron	Up	116098991	116700538	trans
lnc-RP11-168K9.2.1-2	NCF2	chr1	183524698	183560011	Down	chr11	126891642	126971215	Sense	Down	126591642	127271215	trans
lnc-RP11-324D17.2.1-3	TXN2	chr22	36863083	36878077	Up	chr16	54033348	54048240	Intron	Down	53733348	54348240	trans
lnc-RP11-712L6.5.1-3	TXN2	chr22	36863083	36878077	Up	chr11	126164201	126167021	Antisense	Up	125864201	126467021	trans
lnc-RP11-884K10.5.1-2	NCF2	chr1	183524698	183560011	Down	chr3	53996726	54040496	Intergenic	Down	53696726	54340496	trans
lnc-RPF1-1	HMOX2	chr16	4524691	4560348	Up	chr1	84971982	85032789	Antisense	Up	84671982	85332789	trans
lnc-RPS24-8	TXN2	chr22	36863083	36878077	Up	chr10	79782359	79785863	Antisense	Up	79482359	80085863	trans
lnc-RRP1B-1	FOXM1	NA	NA	NA	NA	chr21	45141572	45158712	Sense	Down	44841572	45458712	trans
lnc-SAR1B-1	TXN2	chr22	36863083	36878077	Up	chr5	134061116	134063509	Antisense	Up	133761116	134363509	trans
lnc-SCN2A-6	GCLC	chr6	53362139	53481768	Up	chr2	165802126	165947803	Antisense	Up	165502126	166247803	trans
lnc-SCNN1G-1	SOD1	chr21	33031935	33041244	Up	chr16	23073087	23073553	Intron	Up	22773087	23373553	trans
lnc-SDCCAG8-1	NCF1C	chr7	74572445	74587848	Down	chr1	243708833	243711631	Antisense	Up	243408833	244011631	trans
lnc-SEBOX-1	GCLC	chr6	53362139	53481768	Up	chr17	26688622	26689881	Intergenic	Up	26388622	26989881	trans
lnc-SEC22C-2	TXN2	chr22	36863083	36878077	Up	chr3	42643454	42695880	Sense	Up	42343454	42995880	trans
lnc-SEPT10-2	SOD1	chr21	33031935	33041244	Up	chr2	110595034	110615987	Sense	Up	110295034	110915987	trans
lnc-SEPT14-2	TXN2	chr22	36863083	36878077	Up	chr7	55840869	55841546	Intergenic	Up	55540869	56141546	trans
lnc-SEPT7L-2	XDH	chr2	31557187	31637581	Down	chr10	38934081	39022206	Antisense	Down	38634081	39322206	trans
lnc-SERHL2-7	TXN2	chr22	36863083	36878077	Up	chr22	43217870	43219332	Antisense	Up	42917870	43519332	trans
lnc-SETD8-1	GCLC	chr6	53362139	53481768	Up	chr12	123848355	123850334	Antisense	Up	123548355	124150334	trans
lnc-SH2D7-3	TXN2	chr22	36863083	36878077	Up	chr15	78285746	78287631	Antisense	Up	77985746	78587631	trans
lnc-SH3RF1-2	TXN2	chr22	36863083	36878077	Up	chr4	169784943	169927939	Sense	Up	169484943	170227939	trans
lnc-SKA2-2	TXN2	chr22	36863083	36878077	Up	chr17	57477848	57480664	Intergenic	Up	57177848	57780664	trans
lnc-SLA2-1	GCLC	chr6	53362139	53481768	Up	chr20	35220846	35230365	Intron	Up	34920846	35530365	trans
lnc-SLC24A5-5	TXN2	chr22	36863083	36878077	Up	chr15	48443339	48443970	Antisense	Up	48143339	48743970	trans
lnc-SLC25A47-5	GCLC	chr6	53362139	53481768	Up	chr14	100745712	100749124	Intergenic	Up	100445712	101049124	trans
lnc-SLC36A1-5	SP1	chr12	53773960	53810230	Up	chr5	151186315	151190915	Intergenic	Up	150886315	151490915	trans
lnc-SLC38A8-9	GCLC	chr6	53362139	53481768	Up	chr16	83979516	83980778	Intergenic	Up	83679516	84280778	trans
lnc-SLTM-1	TXN2	chr22	36863083	36878077	Up	chr15	59149029	59157262	Antisense	Up	58849029	59457262	trans
lnc-SMCR7-2	HMOX2	chr16	4524691	4560348	Up	chr17	18176223	18178354	Antisense	Up	17876223	18478354	trans
lnc-SNAPC2-4	SOD1	chr21	33031935	33041244	Up	chr19	8024006	8024896	Intron	Up	7724006	8324896	trans
lnc-SNX20-3	TXN2	chr22	36863083	36878077	Up	chr16	50774820	50776726	Antisense	Up	50474820	51076726	trans
lnc-SNX20-5	HMOX2	chr16	4524691	4560348	Up	chr16	50817769	50837249	Antisense	Up	50517769	51137249	trans
lnc-SOX15-1	SOD1	chr21	33031935	33041244	Up	chr17	7485281	7487390	Antisense	Up	7185281	7787390	trans
lnc-SP110-5	GCLC	chr6	53362139	53481768	Up	chr2	231263879	231273488	Antisense	Up	230963879	231573488	trans
lnc-SPERT-4	TXN2	chr22	36863083	36878077	Up	chr13	46530610	46533781	Intergenic	Up	46230610	46833781	trans
lnc-SPTBN4-3	SOD1	chr21	33031935	33041244	Up	chr19	40949342	40949994	Intron	Up	40649342	41249994	trans
lnc-SPTBN5-2	TXN2	chr22	36863083	36878077	Up	chr15	42062137	42065278	Intergenic	Up	41762137	42365278	trans
lnc-STAT1-1	TXN2	chr22	36863083	36878077	Up	chr2	191798137	191800014	Intron	Up	191498137	192100014	trans
lnc-SUCNR1-4	NCF2	chr1	183524698	183560011	Down	chr3	151663335	151666899	Intergenic	Down	151363335	151966899	trans
lnc-SUSD1-1	TXN2	chr22	36863083	36878077	Up	chr9	114794834	114800010	Intron	Down	114494834	115100010	trans
lnc-SUSD5-1	SOD1	chr21	33031935	33041244	Up	chr3	33185595	33189213	Antisense	Up	32885595	33489213	trans
lnc-TAF1A-1	TXN2	chr22	36863083	36878077	Up	chr1	222763364	222765741	Antisense	Up	222463364	223065741	trans
lnc-TCP1-2	TXN2	chr22	36863083	36878077	Up	chr6	160146542	160148128	Antisense	Up	159846542	160448128	trans
lnc-TCTEX1D1-1	SOD2	chr6	160090089	160183561	Up	chr1	67292624	67294241	Antisense	Up	66992624	67594241	trans
lnc-TESC-4	TXN2	chr22	36863083	36878077	Up	chr12	117468113	117468878	Intergenic	Up	117168113	117768878	trans
lnc-TFB2M-1	HMOX2	chr16	4524691	4560348	Up	chr1	246830008	246831638	Antisense	Up	246530008	247131638	trans
lnc-THRSP-2	TXN2	chr22	36863083	36878077	Up	chr11	77726760	77727541	Antisense	Up	77426760	78027541	trans
lnc-TIAL1-5	NCF2	chr1	183524698	183560011	Down	chr10	121440674	121442476	Intergenic	Down	121140674	121742476	trans
lnc-TICAM1-1	TXN2	chr22	36863083	36878077	Up	chr19	4794993	4795571	Antisense	Up	4494993	5095571	trans
lnc-TIGD6-1	NCF1C	chr7	74572445	74587848	Down	chr5	149362621	149365756	Antisense	Up	149062621	149665756	trans
lnc-TM2D2-1	GCLC	chr6	53362139	53481768	Up	chr8	38827878	38830530	Antisense	Up	38527878	39130530	trans
lnc-TMEM132D-2	NCF2	chr1	183524698	183560011	Down	chr12	130551505	130553098	Intergenic	Down	130251505	130853098	trans
lnc-TMEM138-4	TXN2	chr22	36863083	36878077	Up	chr11	61114589	61116612	Sense	Up	60814589	61416612	trans
lnc-TMEM147-1	TXN2	chr22	36863083	36878077	Up	chr19	36031640	36032480	Antisense	Up	35731640	36332480	trans
lnc-TMEM156-1	GCLC	chr6	53362139	53481768	Up	chr4	39114296	39128438	Intron	Up	38814296	39428438	trans
lnc-TMEM161B-4	NCF1C	chr7	74572445	74587848	Down	chr5	87566340	87583994	Antisense	Up	87266340	87883994	trans
lnc-TMEM164-2	HMOX2	chr16	4524691	4560348	Up	chrX	109437413	109438732	Antisense	Up	109137413	109738732	trans
lnc-TMEM240-1	SOD2	chr6	160090089	160183561	Up	chr1	1497725	1499904	Intron	Up	1197725	1799904	trans
lnc-TMEM41B-4	HMOX2	chr16	4524691	4560348	Up	chr11	9438532	9438844	Antisense	Up	9138532	9738844	trans
lnc-TMEM85-2	GCLC	chr6	53362139	53481768	Up	chr15	34530519	34564617	Antisense	Up	34230519	34864617	trans
lnc-TMTC3-14	HMOX2	chr16	4524691	4560348	Up	chr12	89918768	89934079	Antisense	Up	89618768	90234079	trans
lnc-TRIM16-4	TXN2	chr22	36863083	36878077	Up	chr17	15691100	15691519	Antisense	Up	15391100	15991519	trans
lnc-TRIP10-4	HMOX2	chr16	4524691	4560348	Up	chr19	6680188	6720573	Antisense	Up	6380188	7020573	trans
lnc-TRMT1L-2	TXN2	chr22	36863083	36878077	Up	chr1	185140466	185140842	Intron	Up	184840466	185440842	trans
lnc-TRNT1-1	TXN2	chr22	36863083	36878077	Up	chr3	3194625	3195119	Antisense	Up	2894625	3495119	trans
lnc-TSKS-1	MAPK14	chr6	35995488	36079013	Up	chr19	50311875	50313122	Sense	Up	50011875	50613122	trans
lnc-TTC26-4	HMOX2	chr16	4524691	4560348	Up	chr7	138708092	138708856	Intergenic	Up	138408092	139008856	trans
lnc-TTC35-7	NCF2	chr1	183524698	183560011	Down	chr8	109584871	109585403	Intergenic	Down	109284871	109885403	trans
lnc-TUBGCP4-1	GCLC	chr6	53362139	53481768	Up	chr15	43661418	43668822	Sense	Up	43361418	43968822	trans
lnc-TULP4-1	SOD1	chr21	33031935	33041244	Up	chr6	158703294	158733691	Intergenic	Up	158403294	159033691	trans
lnc-UBC-1	NCF2	chr1	183524698	183560011	Down	chr12	125343128	125362549	Sense	Down	125043128	125662549	trans
lnc-UBE2B-1	TXN2	chr22	36863083	36878077	Up	chr5	133735185	133737612	Intergenic	Up	133435185	134037612	trans
lnc-UMODL1-7	GCLC	chr6	53362139	53481768	Up	chr21	43305203	43305960	Antisense	Up	43005203	43605960	trans
lnc-VPS36-2	SOD1	chr21	33031935	33041244	Up	chr13	53049715	53049947	Antisense	Up	52749715	53349947	trans
lnc-VPS4B-1	TXN2	chr22	36863083	36878077	Up	chr18	61048609	61048864	Intergenic	Up	60748609	61348864	trans
lnc-WDR41-1	TXN2	chr22	36863083	36878077	Up	chr5	76721794	76728984	Sense	Up	76421794	77028984	trans
lnc-WDR67-1	HMOX2	chr16	4524691	4560348	Up	chr8	124014799	124042991	Antisense	Up	123714799	124342991	trans
lnc-WRNIP1-3	TXN2	chr22	36863083	36878077	Up	chr6	2244110	2245808	Antisense	Up	1944110	2545808	trans
lnc-ZBTB25-2	GCLC	chr6	53362139	53481768	Up	chr14	64889652	64915275	Antisense	Up	64589652	65215275	trans
lnc-ZFC3H1-5	NCF2	chr1	183524698	183560011	Down	chr12	72439928	72451157	Intergenic	Down	72139928	72751157	trans
lnc-ZNF101-4	SOD1	chr21	33031935	33041244	Up	chr19	19821996	19822691	Intron	Up	19521996	20122691	trans
lnc-ZNF257-5	GCLC	chr6	53362139	53481768	Up	chr19	22025859	22026637	Antisense	Up	21725859	22326637	trans
lnc-ZNF394-1	TXN2	chr22	36863083	36878077	Up	chr7	99084141	99097947	Sense	Up	98784141	99397947	trans
lnc-ZNF445-4	HMOX2	chr16	4524691	4560348	Up	chr3	44437628	44440531	Antisense	Up	44137628	44740531	trans
lnc-ZNF45-2	TXN2	chr22	36863083	36878077	Up	chr19	44501047	44507022	Sense	Up	44201047	44807022	trans
lnc-ZNF460-2	SOD1	chr21	33031935	33041244	Up	chr19	57815672	57819930	Intergenic	Up	57515672	58119930	trans
lnc-ZNF479-1	FOXM1	NA	NA	NA	NA	chr7	57277571	57289881	Intergenic	Down	56977571	57589881	trans
lnc-ZNF486-6	HMOX2	chr16	4524691	4560348	Up	chr19	20378625	20379200	Intergenic	Up	20078625	20679200	trans
lnc-ZNF506-2	GCLC	chr6	53362139	53481768	Up	chr19	19945685	20008579	Antisense	Up	19645685	20308579	trans
lnc-ZNF681-2	GCLC	chr6	53362139	53481768	Up	chr19	24101882	24141028	Antisense	Up	23801882	24441028	trans
lnc-ZNF738-5	GCLC	chr6	53362139	53481768	Up	chr19	21458356	21477566	Antisense	Up	21158356	21777566	trans
lnc-ZNF740-2	HMOX2	chr16	4524691	4560348	Up	chr12	53551572	53570194	Antisense	Up	53251572	53870194	trans
lnc-ZNF780B-1	GCLC	chr6	53362139	53481768	Up	chr19	40519720	40522954	Antisense	Up	40219720	40822954	trans
lnc-ZNF791-10	SOD1	chr21	33031935	33041244	Up	chr19	12500862	12542068	Antisense	Up	12200862	12842068	trans
lnc-ZNF804B-1	NCF1C	chr7	74572445	74587848	Down	chr7	88339944	88386039	Intergenic	Down	88039944	88686039	trans
lnc-ZNF804B-2	NCF1C	chr7	74572445	74587848	Down	chr7	88983549	89126232	Intergenic	Down	88683549	89426232	trans
lnc-ZNF841-2	HMOX2	chr16	4524691	4560348	Up	chr19	52552062	52598991	Sense	Up	52252062	52898991	trans
lnc-ZSCAN2-6	TXN2	chr22	36863083	36878077	Up	chr15	85113790	85123412	Sense	Up	84813790	85423412	trans
LYPLAL1-AS1	TXN2	chr22	36863083	36878077	Up	chr1	219254316	219347303	Sense	Up	218954316	219647303	trans
MIR4307HG	NCF2	chr1	183524698	183560011	Down	chr14	27342315	27383949	Sense	Down	27042315	27683949	trans
NCBP2-AS1	GCLC	chr6	53362139	53481768	Up	chr3	196666747	196669405	Antisense	Up	196366747	196969405	trans
OIP5-AS1	SOD2	chr6	160090089	160183561	Up	chr15	41576218	41598729	Sense	Up	41276218	41898729	trans
OXCT1-AS1	HMOX2	chr16	4524691	4560348	Up	chr5	41870131	41872338	Sense	Up	41570131	42172338	trans
PLA2G4C-AS1	TXN2	chr22	36863083	36878077	Up	chr19	48564694	48565479	Antisense	Up	48264694	48865479	trans
POTEH-AS1	TXN2	chr22	36863083	36878077	Up	chr22	16274559	16278602	Sense	Up	15974559	16578602	trans
RRM1-AS1	SOD1	chr21	33031935	33041244	Up	chr11	4158345	4159487	Antisense	Up	3858345	4459487	trans
TAB3-AS2	TXN2	chr22	36863083	36878077	Up	chrX	30872437	30872824	Intron	Up	30572437	31172824	trans
UBXN7-AS1	TXN2	chr22	36863083	36878077	Up	chr3	196158255	196159401	Antisense	Up	195858255	196459401	trans
XLOC_002818	GCLC	chr6	53362139	53481768	Up	chr1	156931547	156952650	Intergenic	Up	156631547	157252650	trans
XLOC_1014483	HMOX2	chr16	4524691	4560348	Up	chr17	37004413	37005209	Intergenic	Up	36704413	37305209	trans
XLOC_1015300	GCLC	chr6	53362139	53481768	Up	chr17	71640341	71642041	Intergenic	Up	71340341	71942041	trans
XLOC_1017529	HMOX2	chr16	4524691	4560348	Up	chr17	75557420	75558105	Antisense	Up	75257420	75858105	trans
XLOC_1093926	TXN2	chr22	36863083	36878077	Up	chr18	56718957	56719257	Intron	Up	56418957	57019257	trans
XLOC_1174283	HMOX2	chr16	4524691	4560348	Up	chr19	9757816	9758517	Intergenic	Up	9457816	10058517	trans
XLOC_1174702	TXN2	chr22	36863083	36878077	Up	chr19	20350223	20350573	Intergenic	Up	20050223	20650573	trans
XLOC_1174717	TXN2	chr22	36863083	36878077	Up	chr19	20804625	20825905	Intron	Up	20504625	21125905	trans
XLOC_1174749	GSR	NA	NA	NA	NA	chr19	22023260	22023787	Intron	Up	21723260	22323787	trans
XLOC_1175795	GCLC	chr6	53362139	53481768	Up	chr19	53400800	53401223	Intergenic	Up	53100800	53701223	trans
XLOC_1176581	HMOX2	chr16	4524691	4560348	Up	chr19	11478833	11486380	Antisense	Up	11178833	11786380	trans
XLOC_1176619	GCLC	chr6	53362139	53481768	Up	chr19	12191284	12191594	Intergenic	Up	11891284	12491594	trans
XLOC_1177405	TXN2	chr22	36863083	36878077	Up	chr19	41256244	41257435	Antisense	Up	40956244	41557435	trans
XLOC_1230118	TXN2	chr22	36863083	36878077	Up	chr2	27289857	27290357	Intron	Up	26989857	27590357	trans
XLOC_1230520	TXN2	chr22	36863083	36878077	Up	chr2	55775382	55775873	Intron	Up	55475382	56075873	trans
XLOC_1230790	NCF2	chr1	183524698	183560011	Down	chr2	73923384	73923674	Intergenic	Down	73623384	74223674	trans
XLOC_1233735	SOD1	chr21	33031935	33041244	Up	chr2	37328282	37329349	Intergenic	Up	37028282	37629349	trans
XLOC_1236417	NCF2	chr1	183524698	183560011	Down	chr2	240712543	240712822	Intron	Down	240412543	241012822	trans
XLOC_1482847	TXN2	chr22	36863083	36878077	Up	chr20	3184149	3184886	Intron	Up	2884149	3484886	trans
XLOC_1484828	GCLC	chr6	53362139	53481768	Up	chr20	56288017	56289630	Intergenic	Up	55988017	56589630	trans
XLOC_1585090	NCF2	chr1	183524698	183560011	Down	chr22	34140790	34141123	Intron	Down	33840790	34441123	trans
XLOC_1586489	MAPK14	chr6	35995488	36079013	Up	chr22	50637643	50639047	Antisense	Up	50337643	50939047	trans
XLOC_1623353	GCLC	chr6	53362139	53481768	Up	chr3	196158279	196196945	Antisense	Up	195858279	196496945	trans
XLOC_1625085	TXN2	chr22	36863083	36878077	Up	chr3	141163405	141174121	Antisense	Up	140863405	141474121	trans
XLOC_1829151	SOD1	chr21	33031935	33041244	Up	chr4	95657510	95678631	Antisense	Up	95357510	95978631	trans
XLOC_1831791	TXN2	chr22	36863083	36878077	Up	chr4	156589821	156595833	Intron	Up	156289821	156895833	trans
XLOC_2031229	NCF2	chr1	183524698	183560011	Down	chr5	17517902	17524972	Intergenic	Down	17217902	17824972	trans
XLOC_2217833	TXN2	chr22	36863083	36878077	Up	chr6	58146711	58171923	Intergenic	Up	57846711	58471923	trans
XLOC_2219986	SOD1	chr21	33031935	33041244	Up	chr6	44106223	44116586	Antisense	Up	43806223	44416586	trans
XLOC_235729	TXN2	chr22	36863083	36878077	Up	chr10	51531575	51531776	Intron	Up	51231575	51831776	trans
XLOC_236009	SOD2	chr6	160090089	160183561	Up	chr10	75007669	75011429	Sense	Up	74707669	75311429	trans
XLOC_2393128	SOD1	chr21	33031935	33041244	Up	chr7	8301762	8302435	Sense	Up	8001762	8602435	trans
XLOC_2393515	TXN2	chr22	36863083	36878077	Up	chr7	38355814	38356243	Intergenic	Up	38055814	38656243	trans
XLOC_2394941	TXN2	chr22	36863083	36878077	Up	chr7	140420124	140420684	Intergenic	Up	140120124	140720684	trans
XLOC_2560875	NCF2	chr1	183524698	183560011	Down	chr8	102472997	102504755	Antisense	Up	102172997	102804755	trans
XLOC_2834725	SOD1	chr21	33031935	33041244	Up	chr9	92625	169570	Intergenic	Down	-207375	469570	trans
XLOC_375824	TXN2	chr22	36863083	36878077	Up	chr11	58817436	58861559	Intergenic	Up	58517436	59161559	trans
XLOC_376899	TXN2	chr22	36863083	36878077	Up	chr11	116645341	116645982	Intergenic	Up	116345341	116945982	trans
XLOC_379277	MAPK14	chr6	35995488	36079013	Up	chr11	126232683	126233113	Intron	Down	125932683	126533113	trans
XLOC_379277	NCF1C	chr7	74572445	74587848	Down	chr11	126232683	126233113	Intron	Down	125932683	126533113	trans
XLOC_514233	TXN2	chr22	36863083	36878077	Up	chr12	53432901	53435908	Sense	Up	53132901	53735908	trans
XLOC_514590	SOD1	chr21	33031935	33041244	Up	chr12	72181596	72182817	Intergenic	Up	71881596	72482817	trans
XLOC_515249	TXN2	chr22	36863083	36878077	Up	chr12	117580681	117581435	Intergenic	Up	117280681	117881435	trans
XLOC_515583	SP1	chr12	53773960	53810230	Up	chr12	133017056	133017413	Intergenic	Up	132717056	133317413	trans
XLOC_516712	GCLC	chr6	53362139	53481768	Up	chr12	64843908	64844178	Intergenic	Up	64543908	65144178	trans
XLOC_753260	SOD1	chr21	33031935	33041244	Up	chr14	67997262	67998570	Intergenic	Up	67697262	68298570	trans
XLOC_753553	GCLC	chr6	53362139	53481768	Up	chr14	92226229	92227380	Intergenic	Up	91926229	92527380	trans
XLOC_845791	NCF2	chr1	183524698	183560011	Down	chr15	57776502	57776831	Intron	Down	57476502	58076831	trans
XLOC_846032	SOD1	chr21	33031935	33041244	Up	chr15	72117662	72118354	Intergenic	Up	71817662	72418354	trans
