# Supplementary material for: LncRNAs induce oxidative stress and spermatogenesis by regulating endoplasmic reticulum genes and pathways
Source: Aging (Albany NY). 2021 May 6;13(10):13764–87. doi: 10.18632/aging.202971 (PMC8202879; doi:10.18632/aging.202971)
Supplement: Supplementary Table 18 [file aging-13-202971-s018.csv]

Supplementary Table 18. cis_trans_OT.
lncrna	mrna	chr_mrna	start_mrna	end_mrna	diff_mrna	chr_lncrna	start_lncrna	end_lncrna	sub_lncrna	diff_lncrna	uplim	downlim	regulation
ATP6V0E2-AS1	HOXA11	NA	NA	NA	NA	chr7	149567386	149606793	Sense	Up	149267386	149906793	trans
LINC00390	SPATS2	chr12	49760367	49921205	Down	chr13	44649456	44711480	Antisense	Down	44349456	45011480	trans
LINC00466	TYRO3	chr15	41849873	41871536	Down	chr1	63624706	63782955	Sense	Down	63324706	64082955	trans
LINC00847	HOXA11	NA	NA	NA	NA	chr5	180256955	180262726	Sense	Up	179956955	180562726	trans
LINC00894	HOXA11	NA	NA	NA	NA	chrX	149101199	149392815	Sense	Up	148801199	149692815	trans
LINC00943	SPATS2	chr12	49760367	49921205	Down	chr12	127210815	127230800	Sense	Down	126910815	127530800	trans
LINC01016	SPAM1	chr7	123565286	123611468	Down	chr6	33835282	33864691	Sense	Down	33535282	34164691	trans
lnc-AC107021.1-9	SPATS2	chr12	49760367	49921205	Down	chr3	145091511	145098582	Intergenic	Down	144791511	145398582	trans
lnc-ACMSD-6	LHCGR	NA	NA	NA	NA	chr2	134924890	134928661	Intergenic	Down	134624890	135228661	trans
lnc-ADAMTS16-2	LHCGR	NA	NA	NA	NA	chr5	4866520	4874872	Intergenic	Down	4566520	5174872	trans
lnc-ADAMTS16-2	SOX5	NA	NA	NA	NA	chr5	4866520	4874872	Intergenic	Down	4566520	5174872	trans
lnc-AL033381.1-4	SPATS2	chr12	49760367	49921205	Down	chr6	1143794	1157308	Intergenic	Down	843794	1457308	trans
lnc-APEX1-2	SPATS2	chr12	49760367	49921205	Down	chr14	20906140	20909427	Intergenic	Down	20606140	21209427	trans
lnc-ATPAF2-2	HOXA11	NA	NA	NA	NA	chr17	18007558	18020918	Antisense	Up	17707558	18320918	trans
lnc-BACE1-2	SOHLH1	NA	NA	NA	NA	chr11	117077395	117089180	Sense	Down	116777395	117389180	trans
lnc-BARHL2-4	SPATS2	chr12	49760367	49921205	Down	chr1	91067691	91089795	Intergenic	Down	90767691	91389795	trans
lnc-BCL6-9	SPATA21	chr1	16713612	16763919	Down	chr3	188052372	188061851	Antisense	Up	187752372	188361851	trans
lnc-BOD1-1	TYRO3	chr15	41849873	41871536	Down	chr5	173084842	173252321	Sense	Down	172784842	173552321	trans
lnc-C15orf32-3	HOXA11	NA	NA	NA	NA	chr15	93146139	93171193	Antisense	Up	92846139	93471193	trans
lnc-C6orf201-11	SPATS2	chr12	49760367	49921205	Down	chr6	4198786	4208376	Intergenic	Down	3898786	4508376	trans
lnc-C6orf201-18	SPATS2	chr12	49760367	49921205	Down	chr6	4306476	4316060	Intergenic	Down	4006476	4616060	trans
lnc-C8orf22-13	SPAM1	chr7	123565286	123611468	Down	chr8	49665513	49669734	Intergenic	Down	49365513	49969734	trans
lnc-CACNA2D3-2	SPATS2	chr12	49760367	49921205	Down	chr3	55330227	55334766	Intergenic	Down	55030227	55634766	trans
lnc-CALHM1-1	SPATS2	chr12	49760367	49921205	Down	chr10	105209781	105212148	Sense	Down	104909781	105512148	trans
lnc-CDK12-1	SPATS2	chr12	49760367	49921205	Down	chr17	37700243	37723895	Intergenic	Down	37400243	38023895	trans
lnc-CDYL2-6	SPATS2	chr12	49760367	49921205	Down	chr16	80188949	80597032	Sense	Down	79888949	80897032	trans
lnc-CLDN6-4	SPATA21	chr1	16713612	16763919	Down	chr16	3022793	3030474	Sense	Up	2722793	3330474	trans
lnc-CRBN-1	SPATS2	chr12	49760367	49921205	Down	chr3	3292370	3668980	Intergenic	Down	2992370	3968980	trans
lnc-DALRD3-2	HOXA11	NA	NA	NA	NA	chr3	49017350	49021925	Antisense	Up	48717350	49321925	trans
lnc-DHX15-1	SPATS2	chr12	49760367	49921205	Down	chr4	24427775	24526490	Sense	Down	24127775	24826490	trans
lnc-DISC1-1	SPATS2	chr12	49760367	49921205	Down	chr1	232254254	232322542	Intergenic	Down	231954254	232622542	trans
lnc-DNAH5-4	SPATS2	chr12	49760367	49921205	Down	chr5	13991053	13997879	Intergenic	Down	13691053	14297879	trans
lnc-DPY30-4	LHCGR	NA	NA	NA	NA	chr2	32070220	32092722	Intergenic	Down	31770220	32392722	trans
lnc-DPY30-4	SOX5	NA	NA	NA	NA	chr2	32070220	32092722	Intergenic	Down	31770220	32392722	trans
lnc-ENTPD5-5	HOXA11	NA	NA	NA	NA	chr14	74424714	74486102	Sense	Up	74124714	74786102	trans
lnc-ERV3-1-2	SPATS2	chr12	49760367	49921205	Down	chr7	64439556	64467121	Sense	Down	64139556	64767121	trans
lnc-FAM110B-11	SPATS2	chr12	49760367	49921205	Down	chr8	58348578	58353048	Intergenic	Down	58048578	58653048	trans
lnc-FAM138A-3	SPATS2	chr12	49760367	49921205	Down	chr1	141473	173862	Intergenic	Down	-158527	473862	trans
lnc-GAMT-2	HOXA11	NA	NA	NA	NA	chr19	1385157	1389650	Antisense	Up	1085157	1689650	trans
lnc-HRASLS-2	SPATS2	chr12	49760367	49921205	Down	chr3	192232810	192239187	Intergenic	Down	191932810	192539187	trans
lnc-IL17RA-13	TYRO3	chr15	41849873	41871536	Down	chr22	17338026	17398742	Intergenic	Down	17038026	17698742	trans
lnc-KCNT1-7	SPATA21	chr1	16713612	16763919	Down	chr9	138847104	138847404	Antisense	Up	138547104	139147404	trans
lnc-KHDRBS3-9	SPATS2	chr12	49760367	49921205	Down	chr8	137543021	137997178	Intergenic	Down	137243021	138297178	trans
lnc-KIAA1644-1	SPATS2	chr12	49760367	49921205	Down	chr22	44578910	44583619	Antisense	Down	44278910	44883619	trans
lnc-KNTC1-3	SPATS2	chr12	49760367	49921205	Down	chr12	123140234	123165633	Intergenic	Down	122840234	123465633	trans
lnc-LEP-1	SPATS2	chr12	49760367	49921205	Down	chr7	127946701	127947731	Antisense	Up	127646701	128247731	trans
lnc-LEPROTL1-9	SPATS2	chr12	49760367	49921205	Down	chr8	29661759	29711926	Antisense	Down	29361759	30011926	trans
lnc-MARCH10-1	SPATA21	chr1	16713612	16763919	Down	chr17	61006841	61044171	Intron	Up	60706841	61344171	trans
lnc-METRNL-1	SPATS2	chr12	49760367	49921205	Down	chr17	81061204	81063860	Intergenic	Down	80761204	81363860	trans
lnc-MTR-1	SPATS2	chr12	49760367	49921205	Down	chr1	237070070	237091621	Intergenic	Down	236770070	237391621	trans
lnc-MYB-13	SPATS2	chr12	49760367	49921205	Down	chr6	136265388	136282959	Sense	Down	135965388	136582959	trans
lnc-MYO19-2	SPATS2	chr12	49760367	49921205	Down	chr17	34831793	34842306	Intergenic	Down	34531793	35142306	trans
lnc-NAALADL2-8	SPATS2	chr12	49760367	49921205	Down	chr3	176002926	176015187	Intergenic	Down	175702926	176315187	trans
lnc-NAALADL2-8	TYRO3	chr15	41849873	41871536	Down	chr3	176002926	176015187	Intergenic	Down	175702926	176315187	trans
lnc-NBN-1	SPATS2	chr12	49760367	49921205	Down	chr8	90608314	90769955	Sense	Down	90308314	91069955	trans
lnc-NBPF9-4	SPATS2	chr12	49760367	49921205	Down	chr1	145013725	145016968	Antisense	Down	144713725	145316968	trans
lnc-NEDD1-8	SPATS2	chr12	49760367	49921205	Down	chr12	97867133	97876323	Intron	Down	97567133	98176323	trans
lnc-NRIP1-2	ADCYAP1R1	NA	NA	NA	NA	chr21	16741803	16999459	Intergenic	Down	16441803	17299459	trans
lnc-NTF3-3	SOX5	NA	NA	NA	NA	chr12	5541277	5634785	Sense	Down	5241277	5934785	trans
lnc-NUDT16-1	SPATS2	chr12	49760367	49921205	Down	chr3	131236670	131239724	Intergenic	Down	130936670	131539724	trans
lnc-OXSM-2	MTA3	chr2	42721709	42984087	Down	chr3	25824529	25831477	Antisense	Up	25524529	26131477	trans
lnc-PARN-10	SPATA21	chr1	16713612	16763919	Down	chr16	14399433	14497016	Antisense	Up	14099433	14797016	trans
lnc-PCK1-4	SPATS2	chr12	49760367	49921205	Down	chr20	56343878	56357386	Intergenic	Down	56043878	56657386	trans
lnc-PPIAL4G-5	SPAM1	chr7	123565286	123611468	Down	chr1	143211627	143240439	Intergenic	Down	142911627	143540439	trans
lnc-PPP4C-8	SPATA21	chr1	16713612	16763919	Down	chr16	30125432	30125826	Antisense	Up	29825432	30425826	trans
lnc-PTDSS2-1	SPATS2	chr12	49760367	49921205	Down	chr11	507274	515605	Antisense	Down	207274	815605	trans
lnc-RD3-5	SPATS2	chr12	49760367	49921205	Down	chr1	211565168	211572779	Antisense	Up	211265168	211872779	trans
lnc-RFC2-5	SPATS2	chr12	49760367	49921205	Down	chr7	73455277	73459294	Antisense	Down	73155277	73759294	trans
lnc-RHBDD3-1	SPATS2	chr12	49760367	49921205	Down	chr22	29637343	29652496	Antisense	Down	29337343	29952496	trans
lnc-RP11-404L6.2.1-4	SPATS2	chr12	49760367	49921205	Down	chr5	67124685	67143029	Intergenic	Down	66824685	67443029	trans
lnc-RP11-404L6.2.1-4	TYRO3	chr15	41849873	41871536	Down	chr5	67124685	67143029	Intergenic	Down	66824685	67443029	trans
lnc-RP11-404P21.6.1-9	HOXA11	NA	NA	NA	NA	chr14	96552847	96560227	Antisense	Up	96252847	96860227	trans
lnc-RRP1B-1	ADCYAP1R1	NA	NA	NA	NA	chr21	45141572	45158712	Sense	Down	44841572	45458712	trans
lnc-RTN4IP1-2	SPATS2	chr12	49760367	49921205	Down	chr6	107164787	107235416	Sense	Down	106864787	107535416	trans
lnc-RUNDC3B-1	SPATS2	chr12	49760367	49921205	Down	chr7	87075329	87214789	Antisense	Down	86775329	87514789	trans
lnc-SAP30-2	SPATS2	chr12	49760367	49921205	Down	chr4	174428626	174434499	Intergenic	Down	174128626	174734499	trans
lnc-SBF2-1	SPATS2	chr12	49760367	49921205	Down	chr11	10323788	10326390	Intergenic	Down	10023788	10626390	trans
lnc-SMAD4-2	SPATS2	chr12	49760367	49921205	Down	chr18	48688001	48692340	Intergenic	Down	48388001	48992340	trans
lnc-SNX11-7	SPATS2	chr12	49760367	49921205	Down	chr17	46206812	46208268	Intergenic	Down	45906812	46508268	trans
lnc-SPP1-1	SPATS2	chr12	49760367	49921205	Down	chr4	88843345	88855577	Intergenic	Down	88543345	89155577	trans
lnc-SPTBN5-1	SPATA21	chr1	16713612	16763919	Down	chr15	42117296	42120134	Antisense	Up	41817296	42420134	trans
lnc-SSR3-7	TYRO3	chr15	41849873	41871536	Down	chr3	156359230	156383752	Intergenic	Down	156059230	156683752	trans
lnc-ST6GAL2-1	SPATS2	chr12	49760367	49921205	Down	chr2	107871146	107982329	Sense	Down	107571146	108282329	trans
lnc-SYNM-2	SPATA21	chr1	16713612	16763919	Down	chr15	99679521	99685575	Antisense	Up	99379521	99985575	trans
lnc-TAL2-2	SPATS2	chr12	49760367	49921205	Down	chr9	108418159	108504764	Sense	Down	108118159	108804764	trans
lnc-TBCB-1	SPAM1	chr7	123565286	123611468	Down	chr19	36605190	36606453	Sense	Up	36305190	36906453	trans
lnc-TMEM234-4	HOXA11	NA	NA	NA	NA	chr1	32658801	32665958	Antisense	Up	32358801	32965958	trans
lnc-TRAPPC4-1	SPATA21	chr1	16713612	16763919	Down	chr11	118914898	118916205	Antisense	Up	118614898	119216205	trans
lnc-TSSK6-1	HOXA11	NA	NA	NA	NA	chr19	19465543	19468888	Antisense	Up	19165543	19768888	trans
lnc-UBE2N-1	SPATS2	chr12	49760367	49921205	Down	chr12	93397190	93771512	Sense	Down	93097190	94071512	trans
lnc-UBFD1-1	HOXA11	NA	NA	NA	NA	chr16	23487630	23490537	Antisense	Up	23187630	23790537	trans
lnc-USP40-2	HOXA11	NA	NA	NA	NA	chr2	234370671	234372610	Antisense	Up	234070671	234672610	trans
lnc-USP47-2	SPATS2	chr12	49760367	49921205	Down	chr11	11373972	11374854	Antisense	Up	11073972	11674854	trans
lnc-VN1R2-8	SPATA21	chr1	16713612	16763919	Down	chr19	53643080	53669074	Antisense	Up	53343080	53969074	trans
lnc-VPS13D-1	SPATS2	chr12	49760367	49921205	Down	chr1	12587485	12589505	Intergenic	Down	12287485	12889505	trans
lnc-VPS33B-6	HOXA11	NA	NA	NA	NA	chr15	91835593	91842399	Antisense	Up	91535593	92142399	trans
lnc-WDR26-1	SPATS2	chr12	49760367	49921205	Down	chr1	224789941	224803922	Intergenic	Down	224489941	225103922	trans
lnc-WDR27-1	SPATS2	chr12	49760367	49921205	Down	chr6	169818906	169846389	Intergenic	Down	169518906	170146389	trans
lnc-YPEL5-1	SPATS2	chr12	49760367	49921205	Down	chr2	30147349	30152828	Intergenic	Down	29847349	30452828	trans
lnc-ZNF146-1	SPATA21	chr1	16713612	16763919	Down	chr19	36795481	36812260	Sense	Up	36495481	37112260	trans
lnc-ZNF30-1	SPATS2	chr12	49760367	49921205	Down	chr19	35414102	35417732	Antisense	Down	35114102	35717732	trans
lnc-ZNF30-1	TYRO3	chr15	41849873	41871536	Down	chr19	35414102	35417732	Antisense	Down	35114102	35717732	trans
lnc-ZNF394-2	HOXA11	NA	NA	NA	NA	chr7	99074502	99078842	Antisense	Up	98774502	99378842	trans
lnc-ZNF514-2	SPATA21	chr1	16713612	16763919	Down	chr2	95836539	95846237	Antisense	Up	95536539	96146237	trans
lnc-ZNF775-1	MTA3	chr2	42721709	42984087	Down	chr7	150076417	150109558	Sense	Up	149776417	150409558	trans
lnc-ZNF862-1	SPATS2	chr12	49760367	49921205	Down	chr7	149473189	149524980	Sense	Down	149173189	149824980	trans
lnc-ZNF862-1	TYRO3	chr15	41849873	41871536	Down	chr7	149473189	149524980	Sense	Down	149173189	149824980	trans
MCM3AP-AS1	HOXA11	NA	NA	NA	NA	chr21	47649138	47672765	Sense	Up	47349138	47972765	trans
MIR205HG	SPATS2	chr12	49760367	49921205	Down	chr1	209602164	209605894	Sense	Down	209302164	209905894	trans
PPP3CB-AS1	HOXA11	NA	NA	NA	NA	chr10	75255282	75279828	Antisense	Up	74955282	75579828	trans
RAD51-AS1	TYRO3	chr15	41849873	41871536	Down	chr15	40978405	40987307	Sense	Down	40678405	41287307	trans
SATB1-AS1	TYRO3	chr15	41849873	41871536	Down	chr3	18475293	18959184	Sense	Down	18175293	19259184	trans
TMEM9B-AS1	SPATS2	chr12	49760367	49921205	Down	chr11	8985990	9000466	Sense	Down	8685990	9300466	trans
XLOC_1093784	SOX5	NA	NA	NA	NA	chr18	44546753	44554049	Antisense	Down	44246753	44854049	trans
XLOC_1483768	SPATS2	chr12	49760367	49921205	Down	chr20	58778522	58779015	Intron	Down	58478522	59079015	trans
XLOC_1623377	SPATA21	chr1	16713612	16763919	Down	chr3	196668669	196668950	Intron	Up	196368669	196968950	trans
XLOC_2396126	TYRO3	chr15	41849873	41871536	Down	chr7	56435206	56440872	Intergenic	Down	56135206	56740872	trans
XLOC_2558569	SPATS2	chr12	49760367	49921205	Down	chr8	56856615	56857165	Intron	Down	56556615	57157165	trans
XLOC_379275	SPATS2	chr12	49760367	49921205	Down	chr11	126164383	126174197	Antisense	Up	125864383	126474197	trans
XLOC_753809	SPATA21	chr1	16713612	16763919	Down	chr14	102969992	102970676	Intergenic	Up	102669992	103270676	trans
XLOC_931668	SPATS2	chr12	49760367	49921205	Down	chr16	46418240	46418507	Intergenic	Down	46118240	46718507	trans
XLOC_931842	SPATS2	chr12	49760367	49921205	Down	chr16	57075631	57081098	Sense	Down	56775631	57381098	trans
ZNF337-AS1	HOXA11	NA	NA	NA	NA	chr20	25604649	25658710	Antisense	Up	25304649	25958710	trans
