# Supplementary material for: LncRNAs induce oxidative stress and spermatogenesis by regulating endoplasmic reticulum genes and pathways
Source: Aging (Albany NY). 2021 May 6;13(10):13764–87. doi: 10.18632/aging.202971 (PMC8202879; doi:10.18632/aging.202971)
Supplement: Supplementary Table 19 [file aging-13-202971-s019.csv]

Supplementary Table 19. All Sample.count.condition.
GeneID	treat1	treat2	control1	treat3	treat4	control2	control3	control4	control5	control6	treat5	treat6	Symbol	Cellular_Component	Biological_Process	Molecular_Function	Pathway
1	71	0	0	0	0	0	50	86	29	107	4	0	A1BG;alpha-1-B glycoprotein	GO:0070062//extracellular vesicular exosome;GO:0072562//blood microparticle;GO:0005576//extracellular region;GO:0005615//extracellular space	-	-	K06512//Osteoclast differentiation;B cell receptor signaling pathway
100	0	0	0	0	0	0	0	0	34	0	0	0	ADA;adenosine deaminase	GO:0043025//neuronal cell body;GO:0005737//cytoplasm;GO:0009986//cell surface;GO:0016020//membrane;GO:0030054//cell junction;GO:0032839//dendrite cytoplasm;GO:0009897//external side of plasma membrane;GO:0005886//plasma membrane;GO:0005764//lysosome;GO:0060205//cytoplasmic membrane-bounded vesicle lumen;GO:0005829//cytosol;GO:0005615//extracellular space	GO:0002906//negative regulation of mature B cell apoptotic process;GO:0007155//cell adhesion;GO:0070256//negative regulation of mucus secretion;GO:0002314//germinal center B cell differentiation;GO:0006154//adenosine catabolic process;GO:0046111//xanthine biosynthetic process;GO:0042323//negative regulation of circadian sleep/wake cycle, non-REM sleep;GO:0050850//positive regulation of calcium-me…	GO:0005515//protein binding;GO:0004000//adenosine deaminase activity;GO:0008270//zinc ion binding;GO:0001883//purine nucleoside binding	K01488//Metabolic pathways;Primary immunodeficiency;Purine metabolism
1000	0	0	0	0	0	0	0	0	35	0	12	0	CDH2;cadherin 2, type 1, N-cadherin (neuronal)	GO:0005911//cell-cell junction;GO:0016324//apical plasma membrane;GO:0030027//lamellipodium;GO:0005913//cell-cell adherens junction;GO:0014704//intercalated disc;GO:0045202//synapse;GO:0005886//plasma membrane;GO:0070062//extracellular vesicular exosome;GO:0016021//integral component of membrane;GO:0005916//fascia adherens;GO:0016342//catenin complex;GO:0005925//focal adhesion	GO:0042692//muscle cell differentiation;GO:0010001//glial cell differentiation;GO:0048514//blood vessel morphogenesis;GO:0016477//cell migration;GO:0016339//calcium-dependent cell-cell adhesion via plasma membrane cell adhesion molecules;GO:0051146//striated muscle cell differentiation;GO:0007155//cell adhesion;GO:0007157//heterophilic cell-cell adhesion via plasma membrane cell adhesion molecule…	GO:0008013//beta-catenin binding;GO:0045294//alpha-catenin binding;GO:0045295//gamma-catenin binding;GO:0019903//protein phosphatase binding;GO:0005515//protein binding;GO:0005509//calcium ion binding	K06736//Arrhythmogenic right ventricular cardiomyopathy (ARVC);Cell adhesion molecules (CAMs)
10000	0	181	27	236	714	17	10	0	20	0	53	0	AKT3;v-akt murine thymoma viral oncogene homolog 3	GO:0005634//nucleus;GO:0005737//cytoplasm;GO:0005794//Golgi apparatus;GO:0005886//plasma membrane;GO:0005730//nucleolus	GO:0006468//protein phosphorylation;GO:0007165//signal transduction;GO:0000002//mitochondrial genome maintenance	GO:0005515//protein binding;GO:0004672//protein kinase activity;GO:0004674//protein serine/threonine kinase activity;GO:0005524//ATP binding	K04456//Focal adhesion;VEGF signaling pathway;Glioma;Toxoplasmosis;Osteoclast differentiation;Endometrial cancer;Fc gamma R-mediated phagocytosis;Jak-STAT signaling pathway;HTLV-I infection;Renal cell carcinoma;Epstein-Barr virus infection;ErbB signaling pathway;mTOR signaling pathway;Apoptosis;MAPK signaling pathway;Influenza A;Toll-like receptor signaling pathway;Pancreatic cancer;Chemokine sig…
100009676	0	165	28	161	125	0	0	144	30	0	163	0	ZBTB11-AS1;ZBTB11 antisense RNA 1	-	-	-	-
10001	0	0	0	7	7	0	70	0	25	0	0	0	MED6;mediator complex subunit 6	GO:0005654//nucleoplasm;GO:0005634//nucleus;GO:0016592//mediator complex;GO:0016020//membrane	GO:0006367//transcription initiation from RNA polymerase II promoter;GO:0045944//positive regulation of transcription from RNA polymerase II promoter;GO:0019827//stem cell maintenance;GO:0006357//regulation of transcription from RNA polymerase II promoter;GO:0010467//gene expression	GO:0008134//transcription factor binding;GO:0003677//DNA binding;GO:0001104//RNA polymerase II transcription cofactor activity;GO:0003713//transcription coactivator activity	-
10002	0	0	0	0	0	24	22	3	30	6	0	0	NR2E3;nuclear receptor subfamily 2, group E, member 3	GO:0005654//nucleoplasm;GO:0005667//transcription factor complex;GO:0005634//nucleus	GO:0000122//negative regulation of transcription from RNA polymerase II promoter;GO:0008285//negative regulation of cell proliferation;GO:0010467//gene expression;GO:0007602//phototransduction;GO:0006366//transcription from RNA polymerase II promoter;GO:0006367//transcription initiation from RNA polymerase II promoter;GO:0043401//steroid hormone mediated signaling pathway;GO:0045872//positive reg…	GO:0043565//sequence-specific DNA binding;GO:0005515//protein binding;GO:0008270//zinc ion binding;GO:0003707//steroid hormone receptor activity;GO:0004879//ligand-activated sequence-specific DNA binding RNA polymerase II transcription factor activity	-
100033413	0	0	0	0	0	0	0	0	1	0	0	0	SNORD116-1;small nucleolar RNA, C/D box 116-1	-	-	-	-
100033440	0	0	0	0	0	0	0	0	8	0	0	0	SNORD115-3;small nucleolar RNA, C/D box 115-3	-	-	-	-
100033441	0	0	0	0	0	0	1	0	0	0	0	0	SNORD115-4;small nucleolar RNA, C/D box 115-4	-	-	-	-
100033445	0	0	0	0	0	0	0	0	21	0	0	0	SNORD115-8;small nucleolar RNA, C/D box 115-8	-	-	-	-
100033451	0	0	0	0	0	10	0	0	0	0	0	0	SNORD115-14;small nucleolar RNA, C/D box 115-14	-	-	-	-
100033812	0	0	0	0	0	0	0	0	12	0	0	0	SNORD115-38;small nucleolar RNA, C/D box 115-38	-	-	-	-
100033814	0	0	0	0	0	0	0	0	14	0	0	0	SNORD115-40;small nucleolar RNA, C/D box 115-40	-	-	-	-
100033822	3	0	0	0	0	0	0	0	0	0	0	0	SNORD115-48;small nucleolar RNA, C/D box 115-48	-	-	-	-
100034743	3	0	0	0	0	0	0	0	1	0	0	0	PDZK1P2;PDZ domain containing 1 pseudogene 2	-	-	-	-
100037417	10	1091	325	327	1138	0	23	120	116	1	2037	1	DDTL;D-dopachrome tautomerase-like	GO:0005737//cytoplasm;GO:0070062//extracellular vesicular exosome	GO:0008152//metabolic process	GO:0016829//lyase activity	-
10004	0	0	0	0	0	0	0	0	21	0	0	0	NAALADL1;N-acetylated alpha-linked acidic dipeptidase-like 1	GO:0016021//integral component of membrane;GO:0016324//apical plasma membrane	GO:0006508//proteolysis	GO:0008233//peptidase activity;GO:0004180//carboxypeptidase activity;GO:0046872//metal ion binding;GO:0016805//dipeptidase activity;GO:0008237//metallopeptidase activity	-
100049076	0	0	0	0	0	0	1	0	0	0	0	2	GUSBP9;glucuronidase, beta pseudogene 9	-	-	-	K01195//Starch and sucrose metabolism;Lysosome;Drug metabolism - other enzymes;Porphyrin and chlorophyll metabolism;Pentose and glucuronate interconversions;Metabolic pathways;Glycosaminoglycan degradation
10005	0	26	0	45	34	0	0	0	0	0	40	0	ACOT8;acyl-CoA thioesterase 8	GO:0005782//peroxisomal matrix;GO:0005739//mitochondrion	GO:0033540//fatty acid beta-oxidation using acyl-CoA oxidase;GO:0016032//viral process;GO:0044255//cellular lipid metabolic process;GO:0006637//acyl-CoA metabolic process;GO:0044281//small molecule metabolic process;GO:0043649//dicarboxylic acid catabolic process;GO:0016559//peroxisome fission;GO:0006699//bile acid biosynthetic process;GO:0008206//bile acid metabolic process;GO:0036109//alpha-lin…	GO:0005515//protein binding;GO:0052815//medium-chain acyl-CoA hydrolase activity;GO:0033882//choloyl-CoA hydrolase activity;GO:0052689//carboxylic ester hydrolase activity;GO:0005102//receptor binding;GO:0047617//acyl-CoA hydrolase activity;GO:0016290//palmitoyl-CoA hydrolase activity	K11992//Peroxisome;Metabolic pathways;Primary bile acid biosynthesis
10006	0	30	0	35	93	0	0	61	18	12	0	0	ABI1;abl-interactor 1	GO:0045211//postsynaptic membrane;GO:0005783//endoplasmic reticulum;GO:0070062//extracellular vesicular exosome;GO:0030054//cell junction;GO:0030175//filopodium;GO:0014069//postsynaptic density;GO:0030027//lamellipodium;GO:0031209//SCAR complex;GO:0030426//growth cone;GO:0005829//cytosol;GO:0005622//intracellular;GO:0005634//nucleus	GO:0001756//somitogenesis;GO:0038096//Fc-gamma receptor signaling pathway involved in phagocytosis;GO:0072673//lamellipodium morphogenesis;GO:0045087//innate immune response;GO:0061098//positive regulation of protein tyrosine kinase activity;GO:0008154//actin polymerization or depolymerization;GO:0006928//cellular component movement;GO:0007169//transmembrane receptor protein tyrosine kinase signa…	GO:0008092//cytoskeletal protein binding;GO:0030296//protein tyrosine kinase activator activity;GO:0032403//protein complex binding;GO:0005515//protein binding	K05751//Regulation of actin cytoskeleton
10007	12	0	0	18	32	0	0	0	0	0	2	0	GNPDA1;glucosamine-6-phosphate deaminase 1	GO:0005737//cytoplasm;GO:0070062//extracellular vesicular exosome	GO:0007338//single fertilization;GO:0006044//N-acetylglucosamine metabolic process;GO:0005975//carbohydrate metabolic process;GO:0006091//generation of precursor metabolites and energy;GO:0006043//glucosamine catabolic process	GO:0004342//glucosamine-6-phosphate deaminase activity;GO:0016787//hydrolase activity	K02564//Metabolic pathways;ABC transporters;Two-component system;Lipopolysaccharide biosynthesis;Ribosome;Amino sugar and nucleotide sugar metabolism;Biosynthesis of secondary metabolites
10008	0	0	0	0	0	0	0	0	8	0	32	0	KCNE3;potassium voltage-gated channel, Isk-related family, member 3	GO:0016021//integral component of membrane	GO:0043266//regulation of potassium ion transport;GO:0071805//potassium ion transmembrane transport;GO:0034765//regulation of ion transmembrane transport	GO:0005249//voltage-gated potassium channel activity;GO:0015459//potassium channel regulator activity	K04897//Protein digestion and absorption
10009	122	8	0	62	212	9	0	0	64	0	0	0	ZBTB33;zinc finger and BTB domain containing 33	GO:0005634//nucleus;GO:0005737//cytoplasm;GO:0005886//plasma membrane;GO:0005730//nucleolus	GO:0045892//negative regulation of transcription, DNA-templated;GO:0006351//transcription, DNA-templated;GO:0035556//intracellular signal transduction;GO:0016055//Wnt signaling pathway	GO:0008327//methyl-CpG binding;GO:0046872//metal ion binding;GO:0043565//sequence-specific DNA binding;GO:0005515//protein binding	-
100093630	0	0	0	28	27	19	8	0	0	0	0	0	SNHG8;small nucleolar RNA host gene 8 (non-protein coding)	-	-	-	-
1001	0	0	0	0	0	15	67	5	31	0	43	0	CDH3;cadherin 3, type 1, P-cadherin (placental)	GO:0005913//cell-cell adherens junction;GO:0005737//cytoplasm;GO:0016021//integral component of membrane;GO:0005886//plasma membrane	GO:0007155//cell adhesion;GO:0031424//keratinization;GO:0001895//retina homeostasis;GO:0032912//negative regulation of transforming growth factor beta2 production;GO:0051796//negative regulation of catagen;GO:0043568//positive regulation of insulin-like growth factor receptor signaling pathway;GO:0007601//visual perception;GO:0010838//positive regulation of keratinocyte proliferation;GO:0048023//…	GO:0005509//calcium ion binding	K06796//Cell adhesion molecules (CAMs)
10010	0	0	0	0	37	12	22	0	1	0	0	0	TANK;TRAF family member-associated NFKB activator	GO:0005737//cytoplasm;GO:0005829//cytosol	GO:0007165//signal transduction;GO:0045087//innate immune response;GO:0007249//I-kappaB kinase/NF-kappaB signaling	GO:0005515//protein binding;GO:0046872//metal ion binding;GO:0031625//ubiquitin protein ligase binding	K12650//RIG-I-like receptor signaling pathway
100101266	0	0	0	0	0	0	18	0	19	0	6	0	HAVCR1P1;hepatitis A virus cellular receptor 1 pseudogene 1	-	-	-	-
100101267	0	0	0	0	33	0	22	0	65	0	2	0	POM121C;POM121 transmembrane nucleoporin C	GO:0005789//endoplasmic reticulum membrane;GO:0031965//nuclear membrane;GO:0005643//nuclear pore	GO:0015031//protein transport;GO:0051028//mRNA transport	GO:0005515//protein binding	K14316//RNA transport
100101467	0	30	0	0	107	0	0	0	12	0	12	0	ZSCAN30;zinc finger and SCAN domain containing 30	GO:0005634//nucleus	GO:0006351//transcription, DNA-templated;GO:0006355//regulation of transcription, DNA-templated	GO:0003677//DNA binding;GO:0046872//metal ion binding;GO:0003700//sequence-specific DNA binding transcription factor activity	-
100101938	36	0	0	0	0	0	21	0	49	0	0	0	ANKRD26P3;ankyrin repeat domain 26 pseudogene 3	-	-	-	K10352//Regulation of actin cytoskeleton;Vascular smooth muscle contraction;Hypertrophic cardiomyopathy (HCM);Viral myocarditis;Salmonella infection;Tight junction;Cardiac muscle contraction;Dilated cardiomyopathy
10011	11	1	20	6	8	0	13	96	7	0	0	0	SRA1;steroid receptor RNA activator 1	GO:0005737//cytoplasm;GO:0030529//ribonucleoprotein complex;GO:0005886//plasma membrane;GO:0031252//cell leading edge;GO:0015630//microtubule cytoskeleton;GO:0005667//transcription factor complex;GO:0005634//nucleus;GO:0005730//nucleolus;GO:0045171//intercellular bridge	GO:2000273//positive regulation of receptor activity;GO:0008283//cell proliferation;GO:0042981//regulation of apoptotic process;GO:0030154//cell differentiation;GO:0006351//transcription, DNA-templated;GO:0045944//positive regulation of transcription from RNA polymerase II promoter;GO:0006915//apoptotic process	GO:0030374//ligand-dependent nuclear receptor transcription coactivator activity;GO:0010861//thyroid hormone receptor activator activity;GO:0005515//protein binding;GO:0003677//DNA binding;GO:0003713//transcription coactivator activity	-
100113389	0	0	0	0	0	0	2	0	0	0	0	0	SNORD127;small nucleolar RNA, C/D box 127	-	-	-	-
100113407	0	21	1	7	13	37	45	25	20	0	2	0	TMEM170B;transmembrane protein 170B	GO:0016021//integral component of membrane	-	-	K00939//Pyrimidine metabolism;Biosynthesis of secondary metabolites;Purine metabolism;Metabolic pathways;K11447//Transcriptional misregulation in cancer;K06264//ECM-receptor interaction;K01539//Proximal tubule bicarbonate reclamation;Gastric acid secretion;Bile secretion;Oxidative phosphorylation;Mineral absorption;Pancreatic secretion;Endocrine and other factor-regulated calcium reabsorption;Ald…
100124533	0	0	0	0	0	0	17	0	0	0	0	0	SCARNA27;small Cajal body-specific RNA 27	-	-	-	-
100124534	0	0	0	0	0	0	0	29	0	0	0	0	SNORA84;small nucleolar RNA, H/ACA box 84	-	-	-	-
100124536	0	0	0	0	0	0	0	0	6	0	0	0	SNORA38B;small nucleolar RNA, H/ACA box 38B	-	-	-	-
100124537	0	0	0	0	0	0	0	0	0	0	7	0	SNORA70B;small nucleolar RNA, H/ACA box 70B	-	-	-	-
100124700	85	0	0	0	0	0	0	0	4	0	0	0	HOTAIR;HOX transcript antisense RNA	-	-	-	-
100125288	17	0	0	0	0	0	0	0	0	0	0	0	ZGLP1;zinc finger, GATA-like protein 1	GO:0005634//nucleus	GO:0007283//spermatogenesis;GO:0000122//negative regulation of transcription from RNA polymerase II promoter;GO:0048599//oocyte development;GO:0007275//multicellular organismal development;GO:0006351//transcription, DNA-templated	GO:0043565//sequence-specific DNA binding;GO:0003700//sequence-specific DNA binding transcription factor activity;GO:0008270//zinc ion binding	-
100126296	0	0	0	0	0	0	7	0	0	0	0	0	MIR298;microRNA 298	-	-	-	-
100126299	0	0	0	0	0	0	11	0	0	0	0	0	VTRNA2-1;vault RNA 2-1	-	-	-	-
100126316	0	0	0	0	0	0	0	0	10	0	0	0	MIR873;microRNA 873	-	-	-	-
100126318	0	0	0	0	0	0	0	0	0	0	6	0	MIR301B;microRNA 301b	-	-	-	-
100126335	0	0	0	0	0	21	0	74	0	0	0	0	MIR543;microRNA 543	-	-	-	-
100126342	0	0	0	0	0	0	0	0	15	0	0	0	MIR892A;microRNA 892a	-	-	-	-
100126349	0	0	0	0	0	0	0	0	0	0	6	0	MIR921;microRNA 921	-	-	-	-
100126780	0	0	0	0	0	0	0	0	4	0	0	0	SNAR-G1;small ILF3/NF90-associated RNA G1	-	-	-	-
100126784	0	0	0	6	4	0	0	0	6	0	0	0	LOC100126784;uncharacterized LOC100126784	-	-	-	-
100127206	0	0	0	0	0	0	1	0	0	0	0	0	KIAA1024L;KIAA1024-like	GO:0016021//integral component of membrane	-	-	-
100127889	0	0	0	0	2	0	0	0	5	0	0	0	C10orf131;chromosome 10 open reading frame 131	-	-	-	-
100127983	0	0	0	0	0	0	0	0	2	0	0	0	C8orf88;chromosome 8 open reading frame 88	-	-	-	-
100128006	0	0	0	0	6	0	0	0	0	221	9	0	LOC100128006;uncharacterized LOC100128006	-	-	-	K01875//Metabolic pathways;Aminoacyl-tRNA biosynthesis;Biotin metabolism;Arginine and proline metabolism;K01539//Carbohydrate digestion and absorption;Protein digestion and absorption;Salivary secretion;Cardiac muscle contraction;Mineral absorption;Pancreatic secretion;Endocrine and other factor-regulated calcium reabsorption;Aldosterone-regulated sodium reabsorption;Oxidative phosphorylation;Bil…
100128023	0	0	0	0	0	0	0	0	0	0	10	0	DPPA2P3;developmental pluripotency associated 2 pseudogene 3	-	-	-	-
100128055	0	204	53	81	342	12	0	216	59	0	234	0	SMARCA5-AS1;SMARCA5 antisense RNA 1	-	-	-	-
100128076	0	0	0	0	13	0	19	0	6	0	1	0	LOC100128076;protein tyrosine phosphatase pseudogene	-	-	-	-
100128124	0	0	0	0	0	0	1	0	9	0	0	0	HGC6.3;uncharacterized LOC100128124	-	-	-	K12826//Spliceosome
100128164	0	0	0	0	0	10	0	0	29	0	8	0	LOC100128164;four and a half LIM domains 1 pseudogene	-	-	-	-
100128285	26	0	0	0	0	7	0	45	5	105	0	0	DNM1P35;DNM1 pseudogene 35	-	-	-	K01528//Bacterial invasion of epithelial cells;Endocytosis;Synaptic vesicle cycle;Fc gamma R-mediated phagocytosis;Endocrine and other factor-regulated calcium reabsorption
100128327	0	0	0	0	0	15	0	0	28	0	0	0	TRAPPC3L;trafficking protein particle complex 3-like	GO:0005794//Golgi apparatus;GO:0005783//endoplasmic reticulum	GO:0016192//vesicle-mediated transport	-	-
100128338	93	0	0	8	53	4	0	57	42	37	0	0	FAM83H-AS1;FAM83H antisense RNA 1 (head to head)	-	-	-	K11447//Transcriptional misregulation in cancer
100128361	0	24	0	13	53	0	0	0	0	0	91	0	LOC100128361;uncharacterized LOC100128361	-	-	-	K10572//Phosphatidylinositol signaling system;Metabolic pathways;Inositol phosphate metabolism
100128378	0	0	0	0	0	8	42	0	0	0	7	0	LINC00696;long intergenic non-protein coding RNA 696	-	-	-	-
100128385	1	0	0	0	0	9	2	0	11	0	0	0	FAM225B;family with sequence similarity 225, member B (non-protein coding)	-	-	-	-
100128494	165	6959	5595	4851	13465	1	855	17032	3795	3918	29182	736	LOC100128494;uncharacterized LOC100128494	-	-	-	K00939//Metabolic pathways;Purine metabolism;Biosynthesis of secondary metabolites;Pyrimidine metabolism
100128553	0	1	99	77	5	0	44	6	2	0	62	0	CTAGE4;CTAGE family, member 4	GO:0016021//integral component of membrane	-	-	K10352//Vascular smooth muscle contraction;Regulation of actin cytoskeleton;Viral myocarditis;Hypertrophic cardiomyopathy (HCM);Salmonella infection;Tight junction;Cardiac muscle contraction;Dilated cardiomyopathy
100128569	0	76	2	31	42	0	0	195	0	0	10	0	C19orf71;chromosome 19 open reading frame 71	-	-	-	-
100128573	0	0	0	0	0	0	0	0	0	137	0	0	LOC100128573;uncharacterized LOC100128573	-	-	-	K11447//Transcriptional misregulation in cancer;K12795//Plant-pathogen interaction;NOD-like receptor signaling pathway
100128627	0	0	0	0	0	0	0	0	18	0	0	0	CDC42P3;cell division cycle 42 pseudogene 3	-	-	-	K04393//Salmonella infection;Pancreatic cancer;Endocytosis;MAPK signaling pathway - yeast;Axon guidance;Pathways in cancer;Chemokine signaling pathway;GnRH signaling pathway;Renal cell carcinoma;Epithelial cell signaling in Helicobacter pylori infection;Adherens junction;MAPK signaling pathway;T cell receptor signaling pathway;Leukocyte transendothelial migration;Shigellosis;Fc gamma R-mediated p…
100128640	0	0	0	0	0	17	0	0	17	0	0	0	ACVR2B-AS1;ACVR2B antisense RNA 1	-	-	-	K00939//Metabolic pathways;Biosynthesis of secondary metabolites;Pyrimidine metabolism;Purine metabolism;K11447//Transcriptional misregulation in cancer
100128675	0	114	0	34	43	14	0	116	50	0	226	0	HPN-AS1;HPN antisense RNA 1	-	-	-	K09057//Circadian rhythm - fly;K00939//Purine metabolism;Biosynthesis of secondary metabolites;Pyrimidine metabolism;Metabolic pathways;K11447//Transcriptional misregulation in cancer;K01539//Bile secretion;Gastric acid secretion;Proximal tubule bicarbonate reclamation;Oxidative phosphorylation;Protein digestion and absorption;Salivary secretion;Cardiac muscle contraction;Carbohydrate digestion a…
100128682	0	0	0	0	0	0	0	0	22	0	0	235	LOC100128682;uncharacterized LOC100128682	-	-	-	K11447//Transcriptional misregulation in cancer
100128731	0	1	41	23	70	0	0	0	0	0	25	0	OST4;oligosaccharyltransferase 4 homolog (S. cerevisiae)	GO:0005789//endoplasmic reticulum membrane;GO:0016021//integral component of membrane	-	-	K13355//Peroxisome
100128770	0	100	26	78	111	33	52	1426	413	1	559	0	LOC100128770;uncharacterized LOC100128770	-	-	-	-
100128782	0	72	0	42	189	0	35	148	0	0	163	0	LINC00476;long intergenic non-protein coding RNA 476	-	-	-	K11447//Transcriptional misregulation in cancer;K00939//Purine metabolism;Biosynthesis of secondary metabolites;Pyrimidine metabolism;Metabolic pathways
100128788	0	0	0	0	0	0	0	0	0	0	1	0	SRRM2-AS1;SRRM2 antisense RNA 1	-	-	-	K00939//Purine metabolism;Pyrimidine metabolism;Biosynthesis of secondary metabolites;Metabolic pathways;K00591//Ubiquinone and other terpenoid-quinone biosynthesis;Biosynthesis of secondary metabolites;Metabolic pathways;K01539//Oxidative phosphorylation;Gastric acid secretion;Proximal tubule bicarbonate reclamation;Bile secretion;Mineral absorption;Pancreatic secretion;Endocrine and other facto…
100128811	0	57	0	3	0	7	0	72	13	0	12	0	GPR158-AS1;GPR158 antisense RNA 1	-	-	-	-
100128881	0	223	151	94	171	10	67	649	0	1	452	0	VPS9D1-AS1;VPS9D1 antisense RNA 1	-	-	-	-
100128890	0	0	0	0	0	10	0	0	0	0	0	0	FAM66B;family with sequence similarity 66, member B	-	-	-	-
100128927	0	1	25	6	3	0	9	76	10	0	13	0	ZBTB42;zinc finger and BTB domain containing 42	GO:0005654//nucleoplasm;GO:0005737//cytoplasm;GO:0005634//nucleus	GO:0000122//negative regulation of transcription from RNA polymerase II promoter;GO:0006351//transcription, DNA-templated	GO:0003677//DNA binding;GO:0046872//metal ion binding	K10500//Transcriptional misregulation in cancer;Cell cycle
100128946	0	0	0	0	0	14	40	0	52	0	0	0	LINC01310;long intergenic non-protein coding RNA 1310	-	-	-	-
100128977	0	0	0	0	0	0	0	0	1	0	0	0	MAPT-AS1;MAPT antisense RNA 1	-	-	-	-
100129034	0	898	323	942	1393	26	138	339	90	255	1194	418	LOC100129034;uncharacterized LOC100129034	-	-	-	K02739//Proteasome
100129046	0	0	0	0	10	0	0	0	0	0	2	0	LOC100129046;uncharacterized LOC100129046	-	-	-	-
100129094	0	0	0	0	0	0	0	0	6	0	0	0	BTNL10;butyrophilin-like 10	GO:0016021//integral component of membrane	-	-	-
100129148	1	145	129	217	477	0	0	187	14	85	452	0	LOC100129148;uncharacterized LOC100129148	-	-	-	-
100129196	0	0	0	0	0	0	0	0	0	174	0	0	MATN1-AS1;MATN1 antisense RNA 1	-	-	-	K06238//Focal adhesion;Protein digestion and absorption;ECM-receptor interaction
100129250	0	18	22	36	15	20	30	113	43	0	32	0	TOPORS-AS1;TOPORS antisense RNA 1	-	-	-	K02311//Apoptosis
100129269	0	0	0	0	0	0	0	0	0	0	21	0	LINC01160;long intergenic non-protein coding RNA 1160	-	-	-	K11447//Transcriptional misregulation in cancer;K00939//Biosynthesis of secondary metabolites;Pyrimidine metabolism;Purine metabolism;Metabolic pathways
100129271	162	0	0	0	0	0	0	0	14	0	0	0	C1orf68;chromosome 1 open reading frame 68	GO:0070062//extracellular vesicular exosome	GO:0008544//epidermis development	-	-
100129354	0	0	0	0	0	0	0	5	19	0	0	0	NRADDP;neurotrophin receptor associated death domain, pseudogene	-	-	-	K02583//Cytokine-cytokine receptor interaction;Neurotrophin signaling pathway;Transcriptional misregulation in cancer
100129361	0	46	3	66	282	1	0	84	38	0	91	0	LOC100129361;chromosome X open reading frame 69-like	-	-	-	-
100129385	0	0	0	0	0	0	0	0	0	0	1	0	C9orf92;chromosome 9 open reading frame 92	-	-	-	-
100129405	107	51	97	95	160	1	34	47	93	0	89	3	MSTO2P;misato family member 2, pseudogene	-	-	-	-
100129424	0	0	0	0	0	1	0	101	21	0	0	0	RPL19P12;ribosomal protein L19 pseudogene 12	-	-	-	K02885//Ribosome
100129427	0	0	0	0	0	15	0	56	39	1	5	0	DDC-AS1;DDC antisense RNA 1	-	-	-	K01593//Amphetamine addiction;Tyrosine metabolism;Metabolic pathways;Phenylalanine metabolism;Cocaine addiction;Dopaminergic synapse;Isoquinoline alkaloid biosynthesis;Histidine metabolism;Biosynthesis of secondary metabolites;Serotonergic synapse;Alcoholism;Betalain biosynthesis;Tryptophan metabolism
100129460	0	4	0	0	8	0	0	0	0	0	0	0	DPY19L1P1;DPY19L1 pseudogene 1	-	-	-	K00939//Metabolic pathways;Purine metabolism;Pyrimidine metabolism;Biosynthesis of secondary metabolites;K00591//Biosynthesis of secondary metabolites;Ubiquinone and other terpenoid-quinone biosynthesis;Metabolic pathways;K01539//Proximal tubule bicarbonate reclamation;Gastric acid secretion;Bile secretion;Oxidative phosphorylation;Aldosterone-regulated sodium reabsorption;Pancreatic secretion;Mi…
100129520	0	0	0	0	0	17	0	0	8	13	0	0	LOC100129520;testis expressed sequence 13-like	-	-	-	K13911//Salivary secretion
100129534	0	0	0	0	0	0	0	0	16	0	0	0	LOC100129534;small nuclear ribonucleoprotein polypeptide N pseudogene	-	-	-	-
100129543	0	0	0	0	0	17	0	0	0	0	0	0	ZNF730;zinc finger protein 730	GO:0005634//nucleus	GO:0006351//transcription, DNA-templated;GO:0006355//regulation of transcription, DNA-templated	GO:0003677//DNA binding;GO:0046872//metal ion binding	-
100129583	0	0	0	0	10	0	0	0	0	0	0	0	FAM47E;family with sequence similarity 47, member E	-	-	-	-
100129654	0	0	0	0	0	12	0	0	0	0	6	0	TCF24;transcription factor 24	GO:0005634//nucleus	GO:0006351//transcription, DNA-templated;GO:0006355//regulation of transcription, DNA-templated	GO:0046983//protein dimerization activity;GO:0003677//DNA binding	-
100129669	0	0	0	0	0	10	0	0	13	0	0	0	IZUMO3;IZUMO family member 3	GO:0016021//integral component of membrane;GO:0005886//plasma membrane	-	GO:0042803//protein homodimerization activity	-
100129697	79	0	0	0	0	0	0	0	9	0	0	0	LOC100129697;uncharacterized LOC100129697	-	-	-	-
100129792	0	536	458	1218	898	7	15	0	65	0	527	0	CCDC152;coiled-coil domain containing 152	-	-	-	K00939//Metabolic pathways;Biosynthesis of secondary metabolites;Pyrimidine metabolism;Purine metabolism;K11447//Transcriptional misregulation in cancer
100129842	28	0	0	34	49	0	32	0	50	0	2	0	ZNF737;zinc finger protein 737	GO:0005634//nucleus	GO:0006355//regulation of transcription, DNA-templated;GO:0006351//transcription, DNA-templated	GO:0003677//DNA binding;GO:0046872//metal ion binding	-
100129845	0	82	349	111	19	14	1	384	135	1	194	0	PCOLCE-AS1;PCOLCE antisense RNA 1	-	-	-	-
100129858	0	0	0	0	0	24	0	0	9	0	0	0	SCOC-AS1;SCOC antisense RNA 1	-	-	-	-
100129917	0	0	0	0	0	0	0	0	11	0	0	0	LOC100129917;uncharacterized LOC100129917	-	-	-	K01539//Aldosterone-regulated sodium reabsorption;Pancreatic secretion;Mineral absorption;Endocrine and other factor-regulated calcium reabsorption;Protein digestion and absorption;Salivary secretion;Cardiac muscle contraction;Carbohydrate digestion and absorption;Oxidative phosphorylation;Proximal tubule bicarbonate reclamation;Gastric acid secretion;Bile secretion;K11447//Transcriptional misreg…
100129924	0	0	0	0	0	0	0	0	12	0	11	0	LOC100129924;uncharacterized LOC100129924	-	-	-	K01345//Protein digestion and absorption;Pancreatic secretion
100129940	0	0	0	0	0	29	1	0	24	0	0	0	LOC100129940;uncharacterized LOC100129940	-	-	-	K11447//Transcriptional misregulation in cancer;K01539//Cardiac muscle contraction;Protein digestion and absorption;Salivary secretion;Carbohydrate digestion and absorption;Aldosterone-regulated sodium reabsorption;Endocrine and other factor-regulated calcium reabsorption;Mineral absorption;Pancreatic secretion;Oxidative phosphorylation;Bile secretion;Proximal tubule bicarbonate reclamation;Gastr…
100129973	0	140	64	382	386	16	0	181	14	0	406	0	LOC100129973;uncharacterized LOC100129973	-	-	-	-
10013	0	7	0	0	8	18	0	0	15	0	19	0	HDAC6;histone deacetylase 6	GO:0030424//axon;GO:0043204//perikaryon;GO:0005875//microtubule associated complex;GO:0005634//nucleus;GO:0005901//caveola;GO:0000118//histone deacetylase complex;GO:0030425//dendrite;GO:0005881//cytoplasmic microtubule;GO:0031252//cell leading edge;GO:0005737//cytoplasm;GO:0030286//dynein complex;GO:0005829//cytosol;GO:0005874//microtubule;GO:0048471//perinuclear region of cytoplasm;GO:0016234//…	GO:0071218//cellular response to misfolded protein;GO:0070933//histone H4 deacetylation;GO:0016575//histone deacetylation;GO:0070842//aggresome assembly;GO:0006886//intracellular protein transport;GO:0032418//lysosome localization;GO:0060765//regulation of androgen receptor signaling pathway;GO:0090035//positive regulation of chaperone-mediated protein complex assembly;GO:0016236//macroautophagy;…	GO:0004407//histone deacetylase activity;GO:0051879//Hsp90 protein binding;GO:0001047//core promoter binding;GO:0003779//actin binding;GO:0042903//tubulin deacetylase activity;GO:0019899//enzyme binding;GO:0008270//zinc ion binding;GO:0032041//NAD-dependent histone deacetylase activity (H3-K14 specific);GO:0005515//protein binding;GO:0048156//tau protein binding;GO:0046969//NAD-dependent histone …	K11407//Alcoholism
100130015	71	336	168	215	238	1	21	629	43	1	539	0	URAHP;urate (hydroxyiso-) hydrolase, pseudogene	-	-	-	K07127//Microbial metabolism in diverse environments;Metabolic pathways;Purine metabolism
100130148	0	0	0	0	0	0	0	0	1	0	0	0	MAPT-IT1;MAPT intronic transcript 1 (non-protein coding)	-	-	-	-
100130238	0	0	0	0	0	0	0	1	28	0	0	0	LOC100130238;uncharacterized LOC100130238	-	-	-	-
100130264	0	0	47	0	0	0	5	0	10	23	0	0	LOC100130264;uncharacterized LOC100130264	-	-	-	-
100130274	0	0	0	0	0	4	3	0	0	0	0	0	CCDC166;coiled-coil domain containing 166	-	-	-	-
100130301	0	0	0	0	0	11	0	0	4	0	0	0	LOC100130301;uncharacterized LOC100130301	-	-	-	-
100130302	0	0	0	0	0	0	0	0	18	7	0	0	SUPT20HL1;suppressor of Ty 20 homolog (S. cerevisiae)-like 1	GO:0000124//SAGA complex	GO:2001141//regulation of RNA biosynthetic process	GO:0003712//transcription cofactor activity	-
100130311	0	0	0	10	17	0	13	0	11	0	0	0	C17orf107;chromosome 17 open reading frame 107	-	-	-	K04817//Neuroactive ligand-receptor interaction
100130331	1	0	0	0	0	0	18	57	23	142	0	0	LOC100130331;POTE ankyrin domain family, member F pseudogene	-	-	-	K05692//Influenza A;Salmonella infection;Phagosome;Arrhythmogenic right ventricular cardiomyopathy (ARVC);Phototransduction - fly;Adherens junction;Viral myocarditis;Shigellosis;Leukocyte transendothelial migration;Dilated cardiomyopathy;Bacterial invasion of epithelial cells;Tight junction;Focal adhesion;Vibrio cholerae infection;Pathogenic Escherichia coli infection;Gastric acid secretion;Regul…
100130348	0	31	0	0	0	0	0	0	21	0	0	1	TMEM262;transmembrane protein 262	GO:0016021//integral component of membrane	-	-	-
100130357	0	0	0	0	0	0	0	8	9	0	9	0	LOC100130357;uncharacterized LOC100130357	-	-	-	K03914//Regulation of actin cytoskeleton;Endocytosis;Neuroactive ligand-receptor interaction;Complement and coagulation cascades;Calcium signaling pathway
100130386	52	0	0	3	0	0	0	0	0	191	8	0	LINC00552;long intergenic non-protein coding RNA 552	-	-	-	-
100130418	160	0	0	0	0	0	0	0	0	0	0	0	CECR7;cat eye syndrome chromosome region, candidate 7 (non-protein coding)	-	-	-	K01896//Butanoate metabolism;Metabolic pathways;Lipoic acid metabolism
100130449	0	0	0	0	0	0	0	0	0	179	0	0	PP14571;uncharacterized LOC100130449	-	-	-	-
100130480	0	0	0	0	0	0	9	0	6	0	0	0	LINC01387;long intergenic non-protein coding RNA 1387	-	-	-	-
100130519	0	0	0	0	22	0	0	70	8	0	0	0	TMEM221;transmembrane protein 221	GO:0016021//integral component of membrane	-	-	-
100130539	0	0	0	0	0	0	0	0	9	0	0	0	LOC100130539;uncharacterized LOC100130539	-	-	-	-
100130613	0	0	0	0	0	0	0	0	3	0	0	0	PRR32;proline rich 32	-	-	-	-
100130673	0	0	0	0	0	0	0	116	0	0	0	0	LOC100130673;phosphoribosyl pyrophosphate synthetase 2 pseudogene	-	-	-	K00948//Purine metabolism;Biosynthesis of secondary metabolites;Metabolic pathways;Thiamine metabolism;Microbial metabolism in diverse environments;Oxidative phosphorylation;Pentose phosphate pathway
100130705	0	0	0	0	0	0	27	0	0	0	5	0	LOC100130705;uncharacterized LOC100130705	-	-	-	-
100130733	0	0	0	0	0	18	0	0	0	0	0	0	LRRC70;leucine rich repeat containing 70	GO:0016021//integral component of membrane	-	-	K06248//ECM-receptor interaction;Focal adhesion
100130742	0	0	0	0	0	13	0	0	5	0	0	0	LRRC69;leucine rich repeat containing 69	-	-	-	K12796//NOD-like receptor signaling pathway;K01768//Purine metabolism;Meiosis - yeast
100130771	0	41	5	105	97	0	0	0	0	0	69	0	EFCAB10;EF-hand calcium binding domain 10	-	-	GO:0005509//calcium ion binding	-
100130776	0	0	5	0	0	0	11	0	26	0	0	0	AGAP2-AS1;AGAP2 antisense RNA 1	-	-	-	K12491//Endocytosis
100130827	51	0	0	0	0	0	0	0	12	0	6	0	SBK3;SH3 domain binding kinase family, member 3	-	GO:0006468//protein phosphorylation	GO:0005524//ATP binding;GO:0004674//protein serine/threonine kinase activity	-
100130849	0	0	0	0	0	0	24	0	10	0	0	0	LOC100130849;phosphorylase kinase, gamma 1 (muscle) pseudogene	-	-	-	K00871//Insulin signaling pathway;Calcium signaling pathway
100130855	0	61	1	95	141	0	0	0	0	0	111	0	USP3-AS1;USP3 antisense RNA 1	-	-	-	-
100130890	0	35	1	0	17	0	0	0	0	0	0	0	TSTD3;thiosulfate sulfurtransferase (rhodanese)-like domain containing 3	-	-	-	K00939//Metabolic pathways;Purine metabolism;Pyrimidine metabolism;Biosynthesis of secondary metabolites;K11447//Transcriptional misregulation in cancer
100130894	1	43	32	100	124	0	22	444	53	1	278	0	VAC14-AS1;VAC14 antisense RNA 1	-	-	-	K11447//Transcriptional misregulation in cancer;K01875//Arginine and proline metabolism;Biotin metabolism;Aminoacyl-tRNA biosynthesis;Metabolic pathways;K01539//Carbohydrate digestion and absorption;Salivary secretion;Protein digestion and absorption;Cardiac muscle contraction;Endocrine and other factor-regulated calcium reabsorption;Mineral absorption;Pancreatic secretion;Aldosterone-regulated s…
100130899	0	19	0	26	2	0	0	0	14	0	0	0	LOC100130899;uncharacterized LOC100130899	-	-	-	K00939//Pyrimidine metabolism;Biosynthesis of secondary metabolites;Purine metabolism;Metabolic pathways;K11447//Transcriptional misregulation in cancer
100130958	0	0	0	0	0	0	0	0	0	0	14	0	SYCE1L;synaptonemal complex central element protein 1-like	GO:0000795//synaptonemal complex	GO:0007130//synaptonemal complex assembly	-	-
100130967	0	0	0	0	0	0	0	0	23	0	0	0	C6orf99;chromosome 6 open reading frame 99	-	-	-	-
100130988	0	0	0	0	0	7	0	0	0	0	0	0	C7orf72;chromosome 7 open reading frame 72	-	-	-	-
100131017	0	0	9	0	4	36	1	1	32	0	16	0	ZNF316;zinc finger protein 316	GO:0005634//nucleus	GO:0006355//regulation of transcription, DNA-templated;GO:0006351//transcription, DNA-templated	GO:0046872//metal ion binding;GO:0003677//DNA binding	-
100131067	0	0	0	0	0	0	28	9	17	0	0	0	CKMT2-AS1;CKMT2 antisense RNA 1	-	-	-	K00939//Biosynthesis of secondary metabolites;Pyrimidine metabolism;Purine metabolism;Metabolic pathways;K11447//Transcriptional misregulation in cancer;K00797//Arginine and proline metabolism;Glutathione metabolism;Cysteine and methionine metabolism;Ribosome;beta-Alanine metabolism;Metabolic pathways
100131094	1	203	182	179	96	0	0	210	33	0	370	313	DPP9-AS1;DPP9 antisense RNA 1	-	-	-	-
100131137	0	0	0	0	0	1	16	0	0	0	0	0	BSPH1;binder of sperm protein homolog 1	GO:0005576//extracellular region;GO:0009986//cell surface	GO:0048240//sperm capacitation;GO:0007338//single fertilization	GO:0008201//heparin binding	K05717//Focal adhesion;Amoebiasis;Small cell lung cancer;Bacterial invasion of epithelial cells;Regulation of actin cytoskeleton;ECM-receptor interaction;Pathways in cancer;K01398//Leukocyte transendothelial migration;Bladder cancer;GnRH signaling pathway;Pathways in cancer
100131176	0	0	0	0	0	0	0	0	2	0	0	0	WDR86-AS1;WDR86 antisense RNA 1	-	-	-	-
100131187	0	14	1	7	4	0	0	1	7	0	8	0	TSTD1;thiosulfate sulfurtransferase (rhodanese)-like domain containing 1	GO:0048471//perinuclear region of cytoplasm;GO:0005737//cytoplasm	-	-	K01011//Metabolic pathways;Cysteine and methionine metabolism;Sulfur relay system
100131193	0	85	111	31	50	0	40	205	45	0	113	0	CCDC183-AS1;CCDC183 antisense RNA 1	-	-	-	-
100131211	0	0	0	0	0	0	3	0	21	222	0	1	TMEM194B;transmembrane protein 194B	GO:0016021//integral component of membrane	-	-	-
100131213	0	0	0	0	0	0	0	0	4	0	0	0	ZNF503-AS2;ZNF503 antisense RNA 2	-	-	-	-
100131244	0	0	0	0	0	0	0	0	19	0	0	0	ANKRD63;ankyrin repeat domain 63	-	-	-	-
100131257	0	0	0	0	0	28	63	1	86	95	2	0	LOC100131257;zinc finger protein 655 pseudogene	-	-	-	-
100131303	0	0	0	0	0	0	0	0	0	0	9	0	LOC100131303;uncharacterized LOC100131303	-	-	-	-
100131315	0	0	0	0	0	0	0	0	0	0	40	0	LOC100131315;uncharacterized LOC100131315	-	-	-	-
100131378	0	0	0	0	0	0	0	0	37	0	0	0	C11orf91;chromosome 11 open reading frame 91	-	-	-	K04008//Hematopoietic cell lineage;Complement and coagulation cascades
100131390	0	0	0	0	0	0	0	1	0	322	10	0	SP9;Sp9 transcription factor	GO:0005634//nucleus	GO:0006355//regulation of transcription, DNA-templated;GO:0030326//embryonic limb morphogenesis;GO:0006351//transcription, DNA-templated	GO:0003677//DNA binding;GO:0046872//metal ion binding	-
100131439	0	0	0	0	9	0	0	56	26	0	0	0	CD300LD;CD300 molecule-like family member d	GO:0005886//plasma membrane;GO:0016021//integral component of membrane	GO:0002376//immune system process	GO:0005515//protein binding	-
100131454	3	0	26	0	10	13	32	0	15	0	38	0	DBIL5P;diazepam binding inhibitor-like 5, pseudogene	-	-	-	K08762//PPAR signaling pathway
100131496	0	0	0	0	14	0	0	79	6	0	0	0	LOC100131496;uncharacterized LOC100131496	-	-	-	K00939//Biosynthesis of secondary metabolites;Pyrimidine metabolism;Purine metabolism;Metabolic pathways;K11447//Transcriptional misregulation in cancer
100131539	0	0	0	0	0	0	0	0	14	0	0	0	ZNF705E;zinc finger protein 705E	GO:0005634//nucleus	GO:0006351//transcription, DNA-templated;GO:0006355//regulation of transcription, DNA-templated	GO:0046872//metal ion binding;GO:0003677//DNA binding	-
100131626	0	49	5	56	12	0	0	0	29	0	63	0	LOC100131626;uncharacterized LOC100131626	-	-	-	K10596//Ubiquitin mediated proteolysis
100131691	0	19	0	38	43	0	15	69	29	0	35	0	LOC100131691;uncharacterized LOC100131691	-	-	-	K01875//Arginine and proline metabolism;Biotin metabolism;Metabolic pathways;Aminoacyl-tRNA biosynthesis;K11447//Transcriptional misregulation in cancer;K00939//Metabolic pathways;Purine metabolism;Pyrimidine metabolism;Biosynthesis of secondary metabolites
100131755	0	0	0	0	7	37	0	37	70	1	4	0	ARMCX4;armadillo repeat containing, X-linked 4	GO:0016021//integral component of membrane	-	-	K01352//Neuroactive ligand-receptor interaction;K12465//Neurotrophin signaling pathway;K05185//GABAergic synapse;Morphine addiction;Nicotine addiction;Retrograde endocannabinoid signaling;Neuroactive ligand-receptor interaction
100131801	0	0	0	9	13	0	5	0	0	0	0	0	PET100;PET100 homolog (S. cerevisiae)	GO:0005739//mitochondrion;GO:0016021//integral component of membrane	-	-	-
100131825	19	0	1	13	0	13	0	86	1	134	1	0	CADM3-AS1;CADM3 antisense RNA 1	-	-	-	K06780//Cell adhesion molecules (CAMs)
100131827	0	47	1	36	8	0	0	0	0	0	0	0	ZNF717;zinc finger protein 717	GO:0005634//nucleus	GO:0006355//regulation of transcription, DNA-templated;GO:0006351//transcription, DNA-templated	GO:0003700//sequence-specific DNA binding transcription factor activity;GO:0046872//metal ion binding;GO:0003677//DNA binding	-
100131897	0	0	0	0	0	0	47	76	10	0	0	1	FAM196B;family with sequence similarity 196, member B	-	-	-	-
100131980	0	0	0	0	0	22	0	0	17	0	5	0	ZNF705G;zinc finger protein 705G	GO:0005634//nucleus	GO:0006355//regulation of transcription, DNA-templated;GO:0006351//transcription, DNA-templated	GO:0003677//DNA binding;GO:0046872//metal ion binding	-
100131998	0	32	1	7	34	0	5	1	30	0	16	0	RRN3P3;RNA polymerase I transcription factor homolog (S. cerevisiae) pseudogene 3	-	-	-	-
100132057	0	0	3	8	0	2	0	0	0	0	1	0	LOC100132057;phosphodiesterase 4D interacting protein pseudogene	-	-	-	-
100132074	0	0	23	0	0	0	0	0	46	0	0	0	FOXO6;forkhead box O6	GO:0005737//cytoplasm;GO:0005634//nucleus	GO:0006351//transcription, DNA-templated;GO:0006355//regulation of transcription, DNA-templated	GO:0043565//sequence-specific DNA binding;GO:0005515//protein binding;GO:0003700//sequence-specific DNA binding transcription factor activity	K07201//Prostate cancer;Transcriptional misregulation in cancer;Pathways in cancer;Insulin signaling pathway
100132103	0	0	0	0	0	0	0	0	0	2	0	0	FAM66E;family with sequence similarity 66, member E	-	-	-	-
100132111	0	0	0	0	19	0	0	0	0	0	3	0	LOC100132111;uncharacterized LOC100132111	-	-	-	-
100132163	0	72	1	36	72	0	32	0	11	0	126	319	PHKA2-AS1;PHKA2 antisense RNA 1	-	-	-	K07190//Insulin signaling pathway;Calcium signaling pathway
100132174	0	0	0	0	0	12	27	0	3	0	0	0	LOC100132174;uncharacterized LOC100132174	-	-	-	-
100132215	0	35	110	48	33	0	0	321	11	1	86	0	LOC100132215;uncharacterized LOC100132215	-	-	-	-
100132247	1	0	0	0	0	11	1	6	1	1	0	0	NPIPB5;nuclear pore complex interacting protein family, member B5	-	-	-	K01896//Butanoate metabolism;Lipoic acid metabolism;Metabolic pathways;K10413//Vasopressin-regulated water reabsorption;Phagosome;Salmonella infection
100132285	0	0	0	0	0	0	2	0	14	0	0	0	KIR2DS2;killer cell immunoglobulin-like receptor, two domains, short cytoplasmic tail, 2	GO:0005886//plasma membrane;GO:0016021//integral component of membrane	GO:0007165//signal transduction;GO:0006955//immune response;GO:0045087//innate immune response;GO:0050776//regulation of immune response	GO:0004888//transmembrane signaling receptor activity	K07982//Natural killer cell mediated cytotoxicity;Antigen processing and presentation;K07980//Natural killer cell mediated cytotoxicity;Graft-versus-host disease;Antigen processing and presentation;K07981//Antigen processing and presentation;Graft-versus-host disease;Natural killer cell mediated cytotoxicity
100132288	0	0	0	0	1	0	0	0	0	0	0	0	TEKT4P2;tektin 4 pseudogene 2	-	-	-	K04688//TGF-beta signaling pathway;ErbB signaling pathway;Fc gamma R-mediated phagocytosis;mTOR signaling pathway;Acute myeloid leukemia;Insulin signaling pathway
100132341	0	0	0	0	0	0	7	0	24	0	0	0	CLUHP3;clustered mitochondria (cluA/CLU1) homolog pseudogene 3	-	-	-	-
100132386	0	0	0	0	0	0	31	0	12	0	0	0	KRTAP4-9;keratin associated protein 4-9	GO:0045095//keratin filament	GO:0007568//aging;GO:0042633//hair cycle	-	-
100132396	0	0	0	0	0	0	0	0	9	0	0	0	ZNF705B;zinc finger protein 705B	GO:0005634//nucleus	GO:0006355//regulation of transcription, DNA-templated;GO:0006351//transcription, DNA-templated	GO:0046872//metal ion binding;GO:0003677//DNA binding	-
100132403	0	0	0	0	0	0	0	56	0	0	0	0	FAM157B;family with sequence similarity 157, member B	-	-	-	-
100132417	4	37	0	11	1	0	0	0	0	0	14	0	FCGR1C;Fc fragment of IgG, high affinity Ic, receptor (CD64), pseudogene	GO:0016021//integral component of membrane;GO:0005886//plasma membrane	GO:0002376//immune system process	GO:0019864//IgG binding	K06498//Systemic lupus erythematosus;Leishmaniasis;Osteoclast differentiation;Staphylococcus aureus infection;Hematopoietic cell lineage;Transcriptional misregulation in cancer;Fc gamma R-mediated phagocytosis;Tuberculosis;Phagosome
100132526	0	0	0	0	0	3	0	26	17	294	0	0	FGD5P1;FYVE, RhoGEF and PH domain containing 5 pseudogene 1	-	-	-	-
100132541	0	0	0	0	0	2	1	0	12	0	0	0	GXYLT1P3;glucoside xylosyltransferase 1 pseudogene 3	-	-	-	K13676//Other types of O-glycan biosynthesis
100132594	0	0	0	0	0	0	14	0	14	0	0	0	PGAM1P5;phosphoglycerate mutase 1 pseudogene 5	-	-	-	K01834//Metabolic pathways;Microbial metabolism in diverse environments;Glycine, serine and threonine metabolism;Glycolysis / Gluconeogenesis;Methane metabolism;Biosynthesis of secondary metabolites
100132618	0	0	0	11	0	0	0	44	9	0	0	0	ZRANB2-AS1;ZRANB2 antisense RNA 1	-	-	-	K04260//Calcium signaling pathway;Neuroactive ligand-receptor interaction
100132707	93	0	1	2	24	0	0	0	0	0	44	0	PAXIP1OS;PAXIP1 opposite strand	-	-	-	-
100132831	0	0	0	0	0	0	0	0	0	0	22	0	LOC100132831;A20-binding inhibitor of NF-kappaB activation 2 pseudogene	-	-	-	-
100132832	0	0	7	30	0	0	0	0	1	0	0	0	PMS2P9;postmeiotic segregation increased 2 pseudogene 9	-	-	-	K10858//Mismatch repair;Fanconi anemia pathway
100132891	0	0	0	0	0	0	0	0	29	0	13	0	LOC100132891;uncharacterized LOC100132891	-	-	-	-
100132911	131	39	0	45	29	0	20	7	0	0	48	0	DPH3P1;diphthamide biosynthesis 3 pseudogene 1	-	-	GO:0046872//metal ion binding	-
100132916	0	0	0	0	0	0	17	0	20	0	0	0	FAM159B;family with sequence similarity 159, member B	GO:0016021//integral component of membrane	-	-	-
100132979	0	0	0	0	1	0	0	0	2	15	0	4	GOLGA8DP;golgin A8 family, member D, pseudogene	GO:0005794//Golgi apparatus	-	-	-
100133077	0	0	0	7	0	12	16	109	38	0	0	0	LOC100133077;uncharacterized LOC100133077	-	-	-	K00939//Metabolic pathways;Pyrimidine metabolism;Biosynthesis of secondary metabolites;Purine metabolism;K11447//Transcriptional misregulation in cancer
100133091	0	56	53	75	182	6	0	0	33	4	543	0	LOC100133091;uncharacterized LOC100133091	-	-	-	K14316//RNA transport
100133121	0	7	1	0	16	0	3	63	8	0	17	0	FAM27B;family with sequence similarity 27, member B	-	-	-	-
100133161	89	0	0	0	0	0	0	2	3	0	0	0	LINC01001;long intergenic non-protein coding RNA 1001	-	-	-	K10955//Amoebiasis;Vibrio cholerae infection
100133172	4	0	0	0	0	0	0	0	19	0	0	0	FAM66A;family with sequence similarity 66, member A	-	-	-	-
100133234	0	0	0	0	0	0	15	74	72	0	0	0	SBF1P1;SET binding factor 1 pseudogene 1	-	-	-	-
100133286	107	607	106	459	572	0	50	538	34	1	1030	1	LOC100133286;uncharacterized LOC100133286	-	-	-	K00079//Metabolism of xenobiotics by cytochrome P450;Arachidonic acid metabolism;Metabolic pathways
100133308	0	0	0	0	0	0	1	0	0	0	0	0	RSU1P2;Ras suppressor protein 1 pseudogene 2	-	-	-	K00939//Metabolic pathways;Biosynthesis of secondary metabolites;Pyrimidine metabolism;Purine metabolism;K00591//Ubiquinone and other terpenoid-quinone biosynthesis;Biosynthesis of secondary metabolites;Metabolic pathways;K01875//Metabolic pathways;Aminoacyl-tRNA biosynthesis;Biotin metabolism;Arginine and proline metabolism;K01539//Gastric acid secretion;Proximal tubule bicarbonate reclamation;B…
100133311	0	0	0	51	33	0	93	0	2	0	57	0	HOXA-AS3;HOXA cluster antisense RNA 3	-	-	-	-
100133315	71	0	0	0	0	0	0	0	11	0	0	0	LOC100133315;transient receptor potential cation channel, subfamily C, member 2-like	GO:0005634//nucleus	GO:0000012//single strand break repair	GO:0003684//damaged DNA binding	-
100133331	0	0	0	0	0	1	0	0	4	0	0	0	LOC100133331;uncharacterized LOC100133331	-	-	-	-
100133545	0	0	0	0	0	0	0	1	0	0	0	0	MRPL23-AS1;MRPL23 antisense RNA 1	-	-	-	-
100133920	3	0	0	0	0	2	0	0	2	0	0	0	LOC100133920;uncharacterized LOC100133920	-	-	-	K13402//Metabolic pathways;One carbon pool by folate
100133941	209	0	21	34	173	0	0	0	0	0	0	0	CD24;CD24 molecule	GO:0009986//cell surface;GO:0016020//membrane;GO:0045121//membrane raft;GO:0005886//plasma membrane;GO:0031225//anchored component of membrane	GO:0043627//response to estrogen;GO:0002237//response to molecule of bacterial origin;GO:0001666//response to hypoxia;GO:0042632//cholesterol homeostasis;GO:0072139//glomerular parietal epithelial cell differentiation;GO:0016055//Wnt signaling pathway;GO:0042104//positive regulation of activated T cell proliferation;GO:0061098//positive regulation of protein tyrosine kinase activity;GO:0072112//g…	GO:0004871//signal transducer activity;GO:0019901//protein kinase binding;GO:0005515//protein binding;GO:0030296//protein tyrosine kinase activator activity	K11447//Transcriptional misregulation in cancer;K06469//Hematopoietic cell lineage;K01539//Oxidative phosphorylation;Bile secretion;Proximal tubule bicarbonate reclamation;Gastric acid secretion;Carbohydrate digestion and absorption;Protein digestion and absorption;Cardiac muscle contraction;Salivary secretion;Pancreatic secretion;Mineral absorption;Endocrine and other factor-regulated calcium re…
100133991	90	0	0	3	22	0	2	0	32	0	37	1	MAP3K14-AS1;MAP3K14 antisense RNA 1	-	-	-	K04466//NF-kappa B signaling pathway;HTLV-I infection;Intestinal immune network for IgA production;MAPK signaling pathway;T cell receptor signaling pathway;Osteoclast differentiation;Apoptosis;Epstein-Barr virus infection;Epithelial cell signaling in Helicobacter pylori infection
100134391	0	0	0	0	0	0	0	0	25	0	3	0	LOC100134391;uncharacterized LOC100134391	-	-	-	-
100137047	1	0	0	0	1	0	0	0	7	0	0	0	JMJD7;jumonji domain containing 7	-	-	-	K01047//Fc epsilon RI signaling pathway;Long-term depression;Fc gamma R-mediated phagocytosis;Fat digestion and absorption;Toxoplasmosis;Arachidonic acid metabolism;Ether lipid metabolism;VEGF signaling pathway;Glycerophospholipid metabolism;GnRH signaling pathway;alpha-Linolenic acid metabolism;Serotonergic synapse;Pancreatic secretion;Vascular smooth muscle contraction;Metabolic pathways;Glutam…
10014	214	0	31	0	0	30	1	112	38	0	23	0	HDAC5;histone deacetylase 5	GO:0000118//histone deacetylase complex;GO:0005794//Golgi apparatus;GO:0005654//nucleoplasm;GO:0016604//nuclear body;GO:0005737//cytoplasm;GO:0005829//cytosol;GO:0005730//nucleolus;GO:0005634//nucleus	GO:0032869//cellular response to insulin stimulus;GO:0006351//transcription, DNA-templated;GO:0040029//regulation of gene expression, epigenetic;GO:0006325//chromatin organization;GO:0000122//negative regulation of transcription from RNA polymerase II promoter;GO:0042493//response to drug;GO:0010832//negative regulation of myotube differentiation;GO:0070932//histone H3 deacetylation;GO:0007507//h…	GO:0001047//core promoter binding;GO:0003714//transcription corepressor activity;GO:0005080//protein kinase C binding;GO:0070491//repressing transcription factor binding;GO:0004407//histone deacetylase activity;GO:0044212//transcription regulatory region DNA binding;GO:0046969//NAD-dependent histone deacetylase activity (H3-K9 specific);GO:0097372//NAD-dependent histone deacetylase activity (H3-K…	K11406//Epstein-Barr virus infection;Alcoholism
100141515	0	0	0	0	0	0	0	56	0	0	0	0	C17orf99;chromosome 17 open reading frame 99	GO:0005576//extracellular region	-	-	-
100142659	0	0	0	13	10	0	0	0	10	0	8	0	CTAGE8;CTAGE family, member 8	GO:0016021//integral component of membrane	-	-	K10352//Viral myocarditis;Hypertrophic cardiomyopathy (HCM);Regulation of actin cytoskeleton;Vascular smooth muscle contraction;Tight junction;Salmonella infection;Dilated cardiomyopathy;Cardiac muscle contraction
100144748	51	0	62	0	42	27	0	117	38	97	56	343	KLLN;killin, p53-regulated DNA replication inhibitor	GO:0005634//nucleus	GO:0007049//cell cycle;GO:0006915//apoptotic process	GO:0003677//DNA binding	K00939//Purine metabolism;Biosynthesis of secondary metabolites;Pyrimidine metabolism;Metabolic pathways;K01539//Oxidative phosphorylation;Proximal tubule bicarbonate reclamation;Gastric acid secretion;Bile secretion;Pancreatic secretion;Mineral absorption;Endocrine and other factor-regulated calcium reabsorption;Aldosterone-regulated sodium reabsorption;Carbohydrate digestion and absorption;Card…
10015	1	176	3	141	444	21	18	241	121	0	102	1	PDCD6IP;programmed cell death 6 interacting protein	GO:0031982//vesicle;GO:0005737//cytoplasm;GO:0070062//extracellular vesicular exosome;GO:0016020//membrane;GO:0042470//melanosome;GO:0001772//immunological synapse;GO:0005815//microtubule organizing center;GO:0005925//focal adhesion;GO:0005829//cytosol	GO:0007049//cell cycle;GO:0015031//protein transport;GO:0019058//viral life cycle;GO:0006915//apoptotic process;GO:0051301//cell division;GO:0016032//viral process	GO:0042803//protein homodimerization activity;GO:0005515//protein binding;GO:0017124//SH3 domain binding;GO:0048306//calcium-dependent protein binding	K12200//Endocytosis
100151643	0	0	0	0	0	0	0	0	0	57	0	0	KRTAP20-4;keratin associated protein 20-4	-	-	-	-
10016	0	25	0	4	13	0	0	0	9	0	0	0	PDCD6;programmed cell death 6	GO:0031410//cytoplasmic vesicle;GO:0031965//nuclear membrane;GO:0005737//cytoplasm;GO:0005783//endoplasmic reticulum;GO:0005768//endosome;GO:0070062//extracellular vesicular exosome;GO:0005789//endoplasmic reticulum membrane;GO:0005634//nucleus	GO:0030948//negative regulation of vascular endothelial growth factor receptor signaling pathway;GO:0006508//proteolysis;GO:0051592//response to calcium ion;GO:0097190//apoptotic signaling pathway;GO:0001938//positive regulation of endothelial cell proliferation;GO:0010595//positive regulation of endothelial cell migration;GO:0032007//negative regulation of TOR signaling;GO:0001525//angiogenesis;…	GO:0005509//calcium ion binding;GO:0048306//calcium-dependent protein binding;GO:0042803//protein homodimerization activity;GO:0005515//protein binding;GO:0046983//protein dimerization activity;GO:0004198//calcium-dependent cysteine-type endopeptidase activity;GO:0060090//binding, bridging	K14209//Protein digestion and absorption;K07359//Adipocytokine signaling pathway;Alcoholism;K06264//ECM-receptor interaction;K13510//Metabolic pathways;Glycerophospholipid metabolism;Ether lipid metabolism
100169851	0	0	0	0	0	0	0	0	15	0	0	0	PATE3;prostate and testis expressed 3	GO:0005576//extracellular region	-	-	-
10017	0	0	0	9	0	0	0	0	0	0	35	0	BCL2L10;BCL2-like 10 (apoptosis facilitator)	GO:0005741//mitochondrial outer membrane;GO:0016020//membrane;GO:0016021//integral component of membrane;GO:0005739//mitochondrion;GO:0005829//cytosol;GO:0031965//nuclear membrane	GO:0007292//female gamete generation;GO:0006919//activation of cysteine-type endopeptidase activity involved in apoptotic process;GO:0097192//extrinsic apoptotic signaling pathway in absence of ligand;GO:0043066//negative regulation of apoptotic process;GO:0008630//intrinsic apoptotic signaling pathway in response to DNA damage;GO:0043065//positive regulation of apoptotic process;GO:0007283//sper…	GO:0005515//protein binding;GO:0042803//protein homodimerization activity;GO:0046982//protein heterodimerization activity	K04539//Alcoholism;Serotonergic synapse;Retrograde endocannabinoid signaling;Cholinergic synapse;Chemokine signaling pathway;Dopaminergic synapse;GABAergic synapse;Morphine addiction;Glutamatergic synapse
100170220	0	0	0	0	0	0	3	0	0	0	0	0	SNAR-E;small ILF3/NF90-associated RNA E	-	-	-	-
100170226	0	0	0	0	0	7	0	0	11	12	0	0	SNAR-C3;small ILF3/NF90-associated RNA C3	-	-	-	-
100170228	0	0	0	0	0	0	0	0	0	0	5	0	SNAR-G2;small ILF3/NF90-associated RNA G2	-	-	-	-
100170229	0	657	206	283	513	0	46	540	135	0	1070	1098	SRRM5;serine/arginine repetitive matrix 5	-	-	-	K12893//Spliceosome;Herpes simplex infection
100170765	0	0	0	0	0	24	37	0	1	0	0	0	ERICH4;glutamate-rich 4	-	-	-	-
100170841	0	0	0	0	1	0	0	17	0	0	0	0	C17orf96;chromosome 17 open reading frame 96	-	GO:0048663//neuron fate commitment	-	K07603//Protein digestion and absorption
10018	75	0	0	39	84	0	31	0	53	0	7	0	BCL2L11;BCL2-like 11 (apoptosis facilitator)	GO:0019898//extrinsic component of membrane;GO:0005874//microtubule;GO:0012505//endomembrane system;GO:0097141//BIM-BCL-2 complex;GO:0005741//mitochondrial outer membrane;GO:0097140//BIM-BCL-xl complex;GO:0005829//cytosol	GO:0034976//response to endoplasmic reticulum stress;GO:0045787//positive regulation of cell cycle;GO:0042475//odontogenesis of dentin-containing tooth;GO:0060139//positive regulation of apoptotic process by virus;GO:0007283//spermatogenesis;GO:0097190//apoptotic signaling pathway;GO:0008584//male gonad development;GO:0048070//regulation of developmental pigmentation;GO:0097192//extrinsic apoptot…	GO:0005515//protein binding;GO:0008017//microtubule binding	K01875//Biotin metabolism;Arginine and proline metabolism;Metabolic pathways;Aminoacyl-tRNA biosynthesis;K00591//Metabolic pathways;Biosynthesis of secondary metabolites;Ubiquinone and other terpenoid-quinone biosynthesis;K00939//Metabolic pathways;Purine metabolism;Biosynthesis of secondary metabolites;Pyrimidine metabolism
100188893	0	26	0	13	55	0	0	0	19	0	0	0	TOMM6;translocase of outer mitochondrial membrane 6 homolog (yeast)	GO:0005739//mitochondrion;GO:0005742//mitochondrial outer membrane translocase complex	GO:0044267//cellular protein metabolic process;GO:0006626//protein targeting to mitochondrion	-	-
100188954	0	70	0	94	91	22	20	6	104	1	219	0	DNMBP-AS1;DNMBP antisense RNA 1	-	-	-	K00939//Metabolic pathways;Biosynthesis of secondary metabolites;Pyrimidine metabolism;Purine metabolism;K11447//Transcriptional misregulation in cancer
10019	39	0	0	4	0	23	16	0	18	157	52	0	SH2B3;SH2B adaptor protein 3	GO:0005829//cytosol	GO:0035556//intracellular signal transduction;GO:0035162//embryonic hemopoiesis;GO:0030154//cell differentiation;GO:0007596//blood coagulation	GO:0005515//protein binding;GO:0004871//signal transducer activity;GO:0042301//phosphate ion binding;GO:0032403//protein complex binding	K12459//Neurotrophin signaling pathway
100191040	0	20	0	0	15	0	0	0	8	0	0	0	C2CD4D;C2 calcium-dependent domain containing 4D	-	-	-	K08534//Circadian rhythm - mammal
100192204	0	0	0	0	0	16	0	25	20	0	0	0	PPIAP30;peptidylprolyl isomerase A (cyclophilin A) pseudogene 30	-	-	-	-
100192386	64	0	0	0	0	0	30	0	42	0	19	0	FLJ16779;uncharacterized LOC100192386	-	-	-	K03254//RNA transport
100192420	0	0	0	0	0	0	0	0	28	0	13	0	FLJ41941;uncharacterized LOC100192420	-	-	-	K00939//Pyrimidine metabolism;Biosynthesis of secondary metabolites;Purine metabolism;Metabolic pathways;K01539//Bile secretion;Proximal tubule bicarbonate reclamation;Gastric acid secretion;Oxidative phosphorylation;Carbohydrate digestion and absorption;Protein digestion and absorption;Salivary secretion;Cardiac muscle contraction;Mineral absorption;Pancreatic secretion;Endocrine and other facto…
1002	0	0	0	0	0	0	0	90	71	0	53	0	CDH4;cadherin 4, type 1, R-cadherin (retinal)	GO:0005886//plasma membrane;GO:0016021//integral component of membrane	GO:0045216//cell-cell junction organization;GO:0007156//homophilic cell adhesion via plasma membrane adhesion molecules;GO:0034329//cell junction assembly;GO:0034332//adherens junction organization;GO:0007155//cell adhesion	GO:0005509//calcium ion binding	K06797//Cell adhesion molecules (CAMs)
10020	0	91	1	54	81	29	7	0	14	76	6	0	GNE;glucosamine (UDP-N-acetyl)-2-epimerase/N-acetylmannosamine kinase	GO:0005829//cytosol;GO:0005737//cytoplasm	GO:0006045//N-acetylglucosamine biosynthetic process;GO:0006054//N-acetylneuraminate metabolic process;GO:0006047//UDP-N-acetylglucosamine metabolic process;GO:0046835//carbohydrate phosphorylation;GO:0007155//cell adhesion	GO:0005524//ATP binding;GO:0009384//N-acylmannosamine kinase activity;GO:0004553//hydrolase activity, hydrolyzing O-glycosyl compounds;GO:0008761//UDP-N-acetylglucosamine 2-epimerase activity;GO:0046872//metal ion binding	K12409//Metabolic pathways;Amino sugar and nucleotide sugar metabolism
10021	21	0	0	0	0	13	0	26	20	0	6	0	HCN4;hyperpolarization activated cyclic nucleotide-gated potassium channel 4	GO:0005886//plasma membrane;GO:0005887//integral component of plasma membrane;GO:0043195//terminal bouton;GO:0031226//intrinsic component of plasma membrane	GO:0008015//blood circulation;GO:0001701//in utero embryonic development;GO:0034765//regulation of ion transmembrane transport;GO:0071321//cellular response to cGMP;GO:0035725//sodium ion transmembrane transport;GO:0002027//regulation of heart rate;GO:0007268//synaptic transmission;GO:0071805//potassium ion transmembrane transport;GO:0042391//regulation of membrane potential;GO:0006936//muscle co…	GO:0042802//identical protein binding;GO:0030552//cAMP binding;GO:0005248//voltage-gated sodium channel activity;GO:0005249//voltage-gated potassium channel activity;GO:0005261//cation channel activity;GO:0005222//intracellular cAMP activated cation channel activity	-
10022	0	0	0	0	0	0	0	0	21	0	0	0	INSL5;insulin-like 5	GO:0005576//extracellular region	-	GO:0005179//hormone activity	-
10023	0	0	0	0	9	0	0	0	19	0	0	683	FRAT1;frequently rearranged in advanced T-cell lymphomas 1	GO:0005737//cytoplasm	GO:0016055//Wnt signaling pathway;GO:0000578//embryonic axis specification	-	K03069//Wnt signaling pathway
100233156	8	0	0	0	8	0	0	0	12	0	3	0	LOC100233156;tektin 4 pseudogene	-	-	-	K04688//TGF-beta signaling pathway;Fc gamma R-mediated phagocytosis;ErbB signaling pathway;Insulin signaling pathway;Acute myeloid leukemia;mTOR signaling pathway
10024	0	0	0	0	0	37	0	20	39	0	0	248	TROAP;trophinin associated protein	GO:0005737//cytoplasm	GO:0007155//cell adhesion	GO:0005515//protein binding	-
10025	47	1	0	8	13	0	34	135	53	0	51	0	MED16;mediator complex subunit 16	GO:0016020//membrane;GO:0016592//mediator complex;GO:0005634//nucleus;GO:0005654//nucleoplasm	GO:0030518//intracellular steroid hormone receptor signaling pathway;GO:2000273//positive regulation of receptor activity;GO:0006357//regulation of transcription from RNA polymerase II promoter;GO:0045893//positive regulation of transcription, DNA-templated;GO:0030521//androgen receptor signaling pathway;GO:0010467//gene expression;GO:0006366//transcription from RNA polymerase II promoter;GO:0006…	GO:0030375//thyroid hormone receptor coactivator activity;GO:0004872//receptor activity;GO:0003713//transcription coactivator activity;GO:0046966//thyroid hormone receptor binding;GO:0003712//transcription cofactor activity;GO:0003824//catalytic activity;GO:0042809//vitamin D receptor binding	-
10026	0	0	0	5	0	0	0	0	2	0	17	27	PIGK;phosphatidylinositol glycan anchor biosynthesis, class K	GO:0016020//membrane;GO:0042765//GPI-anchor transamidase complex;GO:0005789//endoplasmic reticulum membrane;GO:0030176//integral component of endoplasmic reticulum membrane	GO:0006501//C-terminal protein lipidation;GO:0006508//proteolysis;GO:0044267//cellular protein metabolic process;GO:0043687//post-translational protein modification;GO:0006457//protein folding;GO:0016255//attachment of GPI anchor to protein	GO:0003756//protein disulfide isomerase activity;GO:0004197//cysteine-type endopeptidase activity;GO:0005515//protein binding;GO:0003923//GPI-anchor transamidase activity;GO:0034235//GPI anchor binding	K05290//Metabolic pathways;Glycosylphosphatidylinositol(GPI)-anchor biosynthesis
100271702	0	0	0	0	0	0	0	0	23	94	0	0	LINC00940;long intergenic non-protein coding RNA 940	-	-	-	-
100271715	0	46	0	7	0	8	15	83	76	1	10	0	ARHGEF33;Rho guanine nucleotide exchange factor (GEF) 33	-	GO:0032321//positive regulation of Rho GTPase activity	GO:0005089//Rho guanyl-nucleotide exchange factor activity	K08878//Pathways in cancer;Chronic myeloid leukemia
100271836	31	0	0	0	2	0	16	81	25	5	0	335	SMG1P3;SMG1 pseudogene 3	-	-	-	K08873//mRNA surveillance pathway
100271846	69	0	0	0	0	0	0	1	0	1	0	0	ERVV-2;endogenous retrovirus group V, member 2	GO:0016021//integral component of membrane	-	-	K04257//Olfactory transduction;K13962//Gastric acid secretion
100271849	0	0	0	0	0	0	0	0	0	0	1	0	MEF2B;myocyte enhancer factor 2B	GO:0030054//cell junction;GO:0005667//transcription factor complex;GO:0005737//cytoplasm;GO:0005634//nucleus	GO:0006351//transcription, DNA-templated;GO:0045944//positive regulation of transcription from RNA polymerase II promoter;GO:0007517//muscle organ development	GO:0003700//sequence-specific DNA binding transcription factor activity;GO:0042826//histone deacetylase binding;GO:0001077//RNA polymerase II core promoter proximal region sequence-specific DNA binding transcription factor activity involved in positive regulation of transcription;GO:0046983//protein dimerization activity;GO:0000978//RNA polymerase II core promoter proximal region sequence-specifi…	-
100271873	14	0	0	0	0	10	0	0	13	0	0	0	AIRN;antisense of IGF2R non-protein coding RNA	-	-	-	-
100271874	0	0	49	0	0	0	33	92	2	0	17	0	ZNRF2P2;zinc and ring finger 2 pseudogene 2	-	-	-	-
100271927	21	0	1	0	11	2	1	5	0	0	3	0	RASA4B;RAS p21 protein activator 4B	GO:0005886//plasma membrane;GO:0005829//cytosol	GO:0051056//regulation of small GTPase mediated signal transduction;GO:0035556//intracellular signal transduction;GO:0043547//positive regulation of GTPase activity	GO:0005096//GTPase activator activity;GO:0046872//metal ion binding	K12380//MAPK signaling pathway - fly
100272147	0	0	0	0	19	0	0	0	0	0	0	0	CMC4;C-x(9)-C motif containing 4	GO:0005739//mitochondrion	GO:0008283//cell proliferation	-	-
100272216	0	0	45	0	0	15	0	1	0	33	20	106	LOC100272216;uncharacterized LOC100272216	-	-	-	K14316//RNA transport
100286844	0	166	0	51	99	0	0	45	12	0	185	0	BCDIN3D-AS1;BCDIN3D antisense RNA 1	-	-	-	K00939//Metabolic pathways;Purine metabolism;Biosynthesis of secondary metabolites;Pyrimidine metabolism;K01875//Aminoacyl-tRNA biosynthesis;Metabolic pathways;Arginine and proline metabolism;Biotin metabolism
100286922	0	0	0	0	0	0	0	0	18	0	0	0	LOC100286922;DnaJ (Hsp40) homolog, subfamily B, member 3 pseudogene	-	-	-	-
100286979	2	0	0	0	0	16	0	0	1	98	2	0	ANAPC1P1;anaphase promoting complex subunit 1 pseudogene 1	-	-	-	K03348//Cell cycle;Progesterone-mediated oocyte maturation;Cell cycle - yeast;Ubiquitin mediated proteolysis;Meiosis - yeast;HTLV-I infection;Oocyte meiosis
100287042	0	41	48	18	0	0	0	157	0	176	39	0	LOC100287042;uncharacterized LOC100287042	-	-	-	-
100287072	0	0	0	0	0	41	20	0	13	0	26	0	LOC100287072;ribosomal protein S6 kinase, 70kDa, polypeptide 1 pseudogene	-	-	-	K04688//Acute myeloid leukemia;mTOR signaling pathway;Insulin signaling pathway;TGF-beta signaling pathway;Fc gamma R-mediated phagocytosis;ErbB signaling pathway
100287098	0	0	0	0	0	0	0	92	0	1	41	0	LOC100287098;uncharacterized LOC100287098	-	-	-	-
100287102	0	0	0	0	0	0	0	0	4	36	0	0	DDX11L1;DEAD/H (Asp-Glu-Ala-Asp/His) box helicase 11 like 1	-	-	-	-
100287114	0	0	0	0	0	0	0	0	2	0	0	0	LINC00421;long intergenic non-protein coding RNA 421	-	-	-	-
100287171	2	0	0	0	0	10	0	1	12	0	13	3	WASH1;WAS protein family homolog 1	GO:0031901//early endosome membrane;GO:0071203//WASH complex;GO:0055038//recycling endosome membrane;GO:0005769//early endosome;GO:0055037//recycling endosome	GO:0034314//Arp2/3 complex-mediated actin nucleation;GO:0042147//retrograde transport, endosome to Golgi;GO:0016197//endosomal transport	GO:0003779//actin binding;GO:0043014//alpha-tubulin binding;GO:0005515//protein binding;GO:0031625//ubiquitin protein ligase binding	-
100287216	0	1	0	0	8	0	83	143	104	0	0	0	SH3RF3-AS1;SH3RF3 antisense RNA 1	-	-	-	-
100287226	7	0	0	0	0	0	0	0	3	0	0	0	ZNF729;zinc finger protein 729	GO:0005634//nucleus	GO:0006355//regulation of transcription, DNA-templated;GO:0006351//transcription, DNA-templated	GO:0046872//metal ion binding;GO:0003677//DNA binding	-
100287284	0	0	0	0	0	11	0	0	0	0	0	0	MANSC4;MANSC domain containing 4	GO:0016021//integral component of membrane	-	-	-
100287327	0	0	0	0	0	0	2	0	15	0	0	0	USP17L17;ubiquitin specific peptidase 17-like family member 17	GO:0005634//nucleus;GO:0005783//endoplasmic reticulum	GO:0006511//ubiquitin-dependent protein catabolic process	GO:0008234//cysteine-type peptidase activity;GO:0036459//ubiquitinyl hydrolase activity	-
100287362	0	0	0	0	0	0	0	58	0	0	0	0	PRSS46;protease, serine, 46	-	GO:0006508//proteolysis	GO:0004252//serine-type endopeptidase activity	-
100287482	0	0	0	0	0	0	40	0	0	0	0	0	SMKR1;small lysine-rich protein 1	-	-	-	-
100287569	17	0	0	0	0	0	0	0	0	0	0	0	LINC00173;long intergenic non-protein coding RNA 173	-	-	-	-
100287596	0	0	5	0	0	0	4	75	14	0	0	0	DDX11L5;DEAD/H (Asp-Glu-Ala-Asp/His) box helicase 11 like 5	-	-	-	-
100287718	0	0	0	0	0	25	0	0	41	0	0	0	ANKRD66;ankyrin repeat domain 66	-	-	-	K01395//Protein digestion and absorption
100287722	0	0	0	0	0	0	0	0	39	0	0	0	AP4B1-AS1;AP4B1 antisense RNA 1	-	-	-	K12401//Lysosome
100287898	0	0	0	0	0	0	0	0	26	0	0	0	TTC34;tetratricopeptide repeat domain 34	-	-	-	-
100287932	0	0	0	5	21	0	18	0	0	0	0	0	TIMM23;translocase of inner mitochondrial membrane 23 homolog (yeast)	GO:0005739//mitochondrion;GO:0031305//integral component of mitochondrial inner membrane;GO:0005743//mitochondrial inner membrane;GO:0005758//mitochondrial intermembrane space;GO:0005744//mitochondrial inner membrane presequence translocase complex	GO:0071806//protein transmembrane transport;GO:0044267//cellular protein metabolic process;GO:0006626//protein targeting to mitochondrion	GO:0015450//P-P-bond-hydrolysis-driven protein transmembrane transporter activity;GO:0005515//protein binding	-
100288123	0	0	17	0	0	0	0	14	0	0	0	0	LOC100288123;uncharacterized LOC100288123	-	-	-	-
100288142	0	0	0	0	1	0	0	0	1	0	0	0	NBPF20;neuroblastoma breakpoint family, member 20	GO:0005737//cytoplasm	-	-	-
100288162	0	154	35	108	128	0	1	774	80	0	801	194	LOC100288162;uncharacterized LOC100288162	-	-	-	-
100288332	0	0	0	0	1	0	0	0	1	0	0	0	NPIPA5;nuclear pore complex interacting protein family, member A5	-	-	-	-
100288346	77	0	0	0	0	0	0	36	6	0	0	0	NCAM1-AS1;NCAM1 antisense RNA1	-	-	-	K06491//Cell adhesion molecules (CAMs);Prion diseases
100288413	0	0	0	0	0	0	0	0	61	0	0	0	ERVMER34-1;endogenous retrovirus group MER34, member 1	GO:0016021//integral component of membrane;GO:0019031//viral envelope	-	-	-
100288485	0	0	0	0	0	17	14	0	0	0	0	0	MTRNR2L7;MT-RNR2-like 7	GO:0005737//cytoplasm;GO:0005576//extracellular region	-	-	-
100288486	0	0	0	0	0	20	1	0	11	4	0	0	DDX11L9;DEAD/H (Asp-Glu-Ala-Asp/His) box helicase 11 like 9	-	-	-	-
100288520	0	0	0	0	0	0	0	0	1	0	0	0	USP17L15;ubiquitin specific peptidase 17-like family member 15	GO:0005634//nucleus;GO:0005783//endoplasmic reticulum	GO:0006511//ubiquitin-dependent protein catabolic process	GO:0008234//cysteine-type peptidase activity;GO:0036459//ubiquitinyl hydrolase activity	-
100288524	0	0	0	0	0	11	0	0	2	1	0	0	WI2-2373I1.2;forkhead box L1-like	-	-	-	-
100288527	11	0	1	0	3	31	89	100	83	288	27	30	REXO1L2P;REX1, RNA exonuclease 1 homolog (S. cerevisiae)-like 2 (pseudogene)	-	-	-	K14570//Ribosome biogenesis in eukaryotes
100288615	0	0	0	0	0	0	2	0	0	0	0	0	WHAMMP1;WAS protein homolog associated with actin, golgi membranes and microtubules pseudogene 1	-	-	-	-
100288637	0	0	0	0	0	0	0	34	32	0	13	0	LOC100288637;OTU deubiquitinase 7A pseudogene	-	-	-	-
100288730	0	74	90	84	105	0	12	7	95	0	73	0	PAN3-AS1;PAN3 antisense RNA 1	-	-	-	K12572//RNA degradation
100288797	0	26	0	0	0	0	0	0	1	0	0	0	TMEM239;transmembrane protein 239	GO:0016021//integral component of membrane	-	-	-
100288805	0	0	0	0	0	0	80	24	76	0	16	0	HYDIN2;HYDIN2, axonemal central pair apparatus protein (pseudogene)	-	-	-	-
100288866	0	0	0	0	0	0	0	0	17	0	0	0	LOC100288866;uncharacterized LOC100288866	-	-	-	K02583//Transcriptional misregulation in cancer;Neurotrophin signaling pathway;Cytokine-cytokine receptor interaction
100288966	1	0	0	0	0	0	0	0	1	140	0	0	LOC100288966;POTE ankyrin domain family member D-like	-	-	-	-
100288974	0	0	0	0	0	0	0	0	1	0	0	0	LOC100288974;BMS1 homolog, ribosome assembly protein (yeast) pseudogene	-	-	-	K14569//Ribosome biogenesis in eukaryotes
100289017	0	0	0	0	0	1	0	0	11	0	0	0	MOXD2P;monooxygenase, DBH-like 2, pseudogene	-	GO:0055114//oxidation-reduction process	GO:0005507//copper ion binding;GO:0016715//oxidoreductase activity, acting on paired donors, with incorporation or reduction of molecular oxygen, reduced ascorbate as one donor, and incorporation of one atom of oxygen	K00503//Tyrosine metabolism;Metabolic pathways
100289019	0	0	0	0	5	0	17	39	0	0	0	0	LOC100289019;uncharacterized LOC100289019	-	-	-	K00939//Pyrimidine metabolism;Biosynthesis of secondary metabolites;Purine metabolism;Metabolic pathways
100289137	0	0	0	0	0	0	0	0	22	0	0	0	FAM95C;family with sequence similarity 95, member C	-	-	-	K00490//Arachidonic acid metabolism;Metabolic pathways
100289187	0	0	0	0	0	16	36	0	3	0	0	235	GS1-259H13.2;transmembrane protein 225-like	-	-	-	-
100289341	0	0	0	0	8	0	0	0	43	0	0	0	MAN1B1-AS1;MAN1B1 antisense RNA 1 (head to head)	-	-	-	K00939//Biosynthesis of secondary metabolites;Pyrimidine metabolism;Purine metabolism;Metabolic pathways
100289388	0	0	1	45	61	0	0	113	6	0	38	0	KCTD21-AS1;KCTD21 antisense RNA 1	-	-	-	K01875//Arginine and proline metabolism;Biotin metabolism;Aminoacyl-tRNA biosynthesis;Metabolic pathways;K00591//Metabolic pathways;Ubiquinone and other terpenoid-quinone biosynthesis;Biosynthesis of secondary metabolites;K00939//Pyrimidine metabolism;Biosynthesis of secondary metabolites;Purine metabolism;Metabolic pathways
100289410	0	0	0	0	10	0	0	79	10	0	35	0	MCF2L-AS1;MCF2L antisense RNA 1	-	-	-	-
100289495	0	0	0	10	0	17	0	0	0	230	0	0	LOC100289495;uncharacterized LOC100289495	-	-	-	K04514//TGF-beta signaling pathway;Shigellosis;Leukocyte transendothelial migration;Salmonella infection;Axon guidance;Chemokine signaling pathway;Focal adhesion;Pathogenic Escherichia coli infection;Vascular smooth muscle contraction;Regulation of actin cytoskeleton;Wnt signaling pathway;K00889//Phosphatidylinositol signaling system;Metabolic pathways;Regulation of actin cytoskeleton;Endocytosis…
100289574	120	0	0	0	0	23	43	11	60	0	6	0	HERC2P4;hect domain and RLD 2 pseudogene 4	-	-	-	K10595//Ubiquitin mediated proteolysis
100289580	0	0	0	5	19	12	33	322	6	189	35	0	LOC100289580;uncharacterized LOC100289580	-	-	-	-
100289635	0	0	0	0	21	15	1	0	41	0	0	0	ZNF605;zinc finger protein 605	GO:0005634//nucleus	GO:0006351//transcription, DNA-templated;GO:0006355//regulation of transcription, DNA-templated	GO:0003700//sequence-specific DNA binding transcription factor activity;GO:0046872//metal ion binding;GO:0003677//DNA binding	-
100289656	0	0	0	0	2	0	0	0	0	0	0	0	LOC100289656;Dexi homolog (mouse) pseudogene	-	-	-	-
100289673	0	0	0	0	0	0	1	0	25	0	0	0	LOC100289673;phosphoglycerate mutase family member 5 pseudogene	-	-	-	-
100289678	0	0	0	0	0	21	0	0	14	0	0	0	ZNF783;zinc finger family member 783	GO:0005634//nucleus	GO:0006355//regulation of transcription, DNA-templated;GO:0006351//transcription, DNA-templated	GO:0003677//DNA binding	-
100293516	40	1	1	6	25	0	0	0	31	0	5	0	ZNF587B;zinc finger protein 587B	GO:0005634//nucleus	GO:0006355//regulation of transcription, DNA-templated	GO:0003676//nucleic acid binding;GO:0046872//metal ion binding	-
100294145	0	0	0	0	0	0	0	0	10	0	0	0	LOC100294145;uncharacterized LOC100294145	-	-	-	-
100294362	0	483	87	184	302	0	0	400	282	141	467	0	LOC100294362;uncharacterized LOC100294362	-	-	-	K01539//Oxidative phosphorylation;Bile secretion;Gastric acid secretion;Proximal tubule bicarbonate reclamation;Carbohydrate digestion and absorption;Salivary secretion;Protein digestion and absorption;Cardiac muscle contraction;Mineral absorption;Pancreatic secretion;Endocrine and other factor-regulated calcium reabsorption;Aldosterone-regulated sodium reabsorption;K11447//Transcriptional misreg…
1003	0	0	0	0	0	0	81	28	27	0	7	0	CDH5;cadherin 5, type 2 (vascular endothelium)	GO:0005911//cell-cell junction;GO:0016021//integral component of membrane;GO:0016020//membrane;GO:0030054//cell junction;GO:0005923//tight junction;GO:0005886//plasma membrane	GO:0034332//adherens junction organization;GO:0045216//cell-cell junction organization;GO:0001955//blood vessel maturation;GO:2000114//regulation of establishment of cell polarity;GO:0034329//cell junction assembly;GO:0008285//negative regulation of cell proliferation;GO:0007156//homophilic cell adhesion via plasma membrane adhesion molecules	GO:0005509//calcium ion binding;GO:0005515//protein binding;GO:0044325//ion channel binding;GO:0019903//protein phosphatase binding;GO:0008013//beta-catenin binding;GO:0005102//receptor binding	K06533//Cell adhesion molecules (CAMs);Leukocyte transendothelial migration
100302129	0	0	0	0	0	16	0	0	0	0	0	0	MIR1915;microRNA 1915	-	-	-	-
100302141	0	0	0	0	0	0	25	0	0	0	0	0	MIR1913;microRNA 1913	-	-	-	-
100302144	0	0	0	0	0	0	0	0	22	0	0	0	MIR1912;microRNA 1912	-	-	-	-
100302149	0	0	0	0	0	0	0	0	9	0	0	0	MIR1249;microRNA 1249	-	-	-	-
100302150	0	0	0	0	0	19	0	0	0	0	0	0	MIR1296;microRNA 1296	-	-	-	-
100302153	0	0	0	0	0	0	0	0	3	0	0	0	MIR1298;microRNA 1298	-	-	-	-
100302155	0	0	0	0	0	0	0	0	23	0	0	0	MIR1256;microRNA 1256	-	-	-	-
100302159	0	0	0	0	0	0	0	0	17	0	0	0	MIR548F3;microRNA 548f-3	-	-	-	-
100302163	0	0	0	0	0	0	30	0	0	0	0	0	MIR1278;microRNA 1278	-	-	-	-
100302165	0	0	0	0	0	0	0	0	9	0	0	0	MIR1273A;microRNA 1273a	-	-	-	K00591//Metabolic pathways;Biosynthesis of secondary metabolites;Ubiquinone and other terpenoid-quinone biosynthesis
100302166	0	0	0	0	0	8	0	0	0	0	0	0	MIR1322;microRNA 1322	-	-	-	-
100302167	0	0	0	0	0	0	23	0	33	0	0	0	MIR1299;microRNA 1299	-	-	-	-
100302171	0	0	0	0	0	0	0	0	9	0	0	0	MIR1321;microRNA 1321	-	-	-	-
100302177	0	0	0	0	0	0	0	0	0	37	0	0	MIR1269A;microRNA 1269a	-	-	-	-
100302182	0	0	0	7	16	0	0	0	0	0	0	0	MIR1279;microRNA 1279	-	-	-	-
100302184	0	0	0	0	0	0	0	0	17	0	0	0	MIR1272;microRNA 1272	-	-	-	-
100302191	0	0	0	0	0	15	0	0	15	0	0	0	MIR548I4;microRNA 548i-4	-	-	-	-
100302192	0	0	0	0	0	0	0	0	3	184	0	0	MIR548F1;microRNA 548f-1	-	-	-	-
100302193	0	0	0	0	0	0	0	0	2	0	0	0	MIR1255A;microRNA 1255a	-	-	-	-
100302209	0	0	0	0	0	0	2	0	0	0	0	0	MIR1185-2;microRNA 1185-2	-	-	-	-
100302211	39	0	0	0	0	0	0	0	0	0	0	0	MIR1203;microRNA 1203	-	-	-	-
100302223	0	0	41	0	0	0	0	0	0	0	0	0	MIR1302-8;microRNA 1302-8	-	-	-	-
100302233	0	0	0	0	0	0	0	0	15	0	0	0	MIR1268A;microRNA 1268a	-	-	-	-
100302235	0	0	0	0	0	0	0	0	5	0	0	0	MIR1179;microRNA 1179	-	-	-	-
100302246	0	0	0	0	0	0	13	0	13	0	0	0	MIR1301;microRNA 1301	-	-	-	-
100302254	162	21233	7861	12963	24049	1	916	11111	4301	816	20645	933	MIR1282;microRNA 1282	-	-	-	-
100302255	0	0	0	0	0	0	47	0	0	0	0	0	MIR1323;microRNA 1323	-	-	-	-
100302261	0	0	0	0	0	0	0	0	36	0	0	0	MIR1910;microRNA 1910	-	-	-	-
100302270	0	0	0	0	0	5	0	0	0	0	0	0	MIR1305;microRNA 1305	-	-	-	-
100302275	0	0	0	0	0	0	0	0	0	0	16	0	MIR548L;microRNA 548l	-	-	-	-
100302276	0	0	0	0	0	0	1	0	23	0	0	0	MIR1290;microRNA 1290	-	-	-	-
100302277	0	0	0	0	0	0	0	0	10	0	0	0	MIR548I2;microRNA 548i-2	-	-	-	-
100302281	0	0	0	0	0	0	0	0	17	0	0	0	MIR1208;microRNA 1208	-	-	-	-
100302287	0	0	0	0	0	0	10	0	31	0	9	0	MIR548H3;microRNA 548h-3	-	-	-	-
100303728	173	284	163	155	392	0	6	610	29	6	1747	0	SLC25A5-AS1;SLC25A5 antisense RNA 1	-	-	-	K05863//Calcium signaling pathway;Influenza A;Huntington's disease;HTLV-I infection;Parkinson's disease
100303755	0	0	0	0	0	0	0	0	31	85	7	0	PET117;PET117 homolog (S. cerevisiae)	GO:0005739//mitochondrion	-	-	-
100306975	0	0	0	0	0	9	0	0	26	0	0	0	NDUFAF4P1;NADH dehydrogenase (ubiquinone) complex I, assembly factor 4 pseudogene 1	-	-	-	-
100310846	0	0	0	0	0	0	0	0	21	5	1	0	ANKRD61;ankyrin repeat domain 61	-	-	-	-
100313769	0	0	0	0	0	27	0	0	0	0	0	0	MIR320B2;microRNA 320b-2	-	-	-	-
100313773	0	0	0	0	0	9	0	0	0	0	0	0	MIR548H2;microRNA 548h-2	-	-	-	-
100313774	0	0	0	0	0	0	0	0	25	0	0	0	MIR302E;microRNA 302e	-	-	-	-
100313835	0	0	0	0	0	14	0	0	0	0	0	0	MIR1255B2;microRNA 1255b-2	-	-	-	-
100313837	45	169	133	14	219	0	0	1169	202	2	219	1	MIR762;microRNA 762	-	-	-	-
100313839	0	0	0	0	0	0	25	0	34	0	0	0	MIR2114;microRNA 2114	-	-	-	-
100313841	0	121	107	174	267	0	0	137	29	0	211	0	MIR548Q;microRNA 548q	-	-	-	-
100313842	0	0	0	0	0	17	0	0	0	0	23	0	MIR2276;microRNA 2276	-	-	-	-
100313884	0	0	0	0	0	0	28	0	5	0	0	0	MIR548H4;microRNA 548h-4	-	-	-	-
100316904	0	0	0	0	0	0	0	0	12	0	0	0	SAP25;Sin3A-associated protein, 25kDa	GO:0005634//nucleus;GO:0005737//cytoplasm	GO:0006355//regulation of transcription, DNA-templated;GO:0006351//transcription, DNA-templated	-	-
100329135	0	0	0	0	0	30	0	0	8	0	0	0	TRPC5OS;TRPC5 opposite strand	-	-	-	-
100335030	73	0	0	0	0	0	0	0	8	0	1	0	LOC100335030;FGFR1 oncogene partner 2 pseudogene	-	-	-	K00939//Purine metabolism;Pyrimidine metabolism;Biosynthesis of secondary metabolites;Metabolic pathways;K12656//RIG-I-like receptor signaling pathway
100337591	0	0	0	0	0	0	0	0	0	0	4	0	SNORA70F;small nucleolar RNA, H/ACA box 70F	-	-	-	-
10036	0	1	0	1	3	0	44	0	20	0	20	0	CHAF1A;chromatin assembly factor 1, subunit A (p150)	GO:0033186//CAF-1 complex;GO:0043234//protein complex;GO:0000790//nuclear chromatin	GO:0006260//DNA replication;GO:0006351//transcription, DNA-templated;GO:0006281//DNA repair;GO:0006355//regulation of transcription, DNA-templated;GO:0031497//chromatin assembly;GO:0007049//cell cycle;GO:0006461//protein complex assembly;GO:0006335//DNA replication-dependent nucleosome assembly	GO:0070087//chromo shadow domain binding;GO:0003682//chromatin binding;GO:0051082//unfolded protein binding;GO:0042802//identical protein binding;GO:0005515//protein binding	-
100379220	0	0	0	0	12	0	0	0	0	0	0	0	TMED11P;transmembrane emp24 protein transport domain containing 11, pseudogene	-	-	-	-
100379571	0	22	56	17	0	0	0	39	0	3	186	0	BACE1-AS;BACE1 antisense RNA	-	-	-	K00797//beta-Alanine metabolism;Metabolic pathways;Cysteine and methionine metabolism;Ribosome;Arginine and proline metabolism;Glutathione metabolism;K11447//Transcriptional misregulation in cancer;K14443//RNA degradation;K00939//Metabolic pathways;Pyrimidine metabolism;Biosynthesis of secondary metabolites;Purine metabolism
10038	82	18	0	0	16	0	0	0	9	0	0	0	PARP2;poly (ADP-ribose) polymerase 2	GO:0005634//nucleus;GO:0005654//nucleoplasm;GO:0005730//nucleolus	GO:0006284//base-excision repair;GO:0006471//protein ADP-ribosylation;GO:0006281//DNA repair;GO:0097191//extrinsic apoptotic signaling pathway	GO:0005515//protein binding;GO:0003677//DNA binding;GO:0003950//NAD+ ADP-ribosyltransferase activity	K10798//NF-kappa B signaling pathway;Base excision repair
100381270	0	0	1	39	62	0	0	0	20	0	0	0	ZBED6;zinc finger, BED-type containing 6	GO:0005634//nucleus;GO:0005730//nucleolus	GO:0045892//negative regulation of transcription, DNA-templated;GO:0006351//transcription, DNA-templated	GO:0046983//protein dimerization activity;GO:0046872//metal ion binding;GO:0003677//DNA binding	-
10039	0	0	0	0	0	11	26	0	0	3	26	0	PARP3;poly (ADP-ribose) polymerase family, member 3	GO:0005634//nucleus;GO:0035861//site of double-strand break;GO:0005814//centriole	GO:0060236//regulation of mitotic spindle organization;GO:0000723//telomere maintenance;GO:0006302//double-strand break repair;GO:1990166//protein localization to site of double-strand break;GO:0051106//positive regulation of DNA ligation;GO:0006281//DNA repair;GO:0006471//protein ADP-ribosylation	GO:0003824//catalytic activity;GO:0003950//NAD+ ADP-ribosyltransferase activity	K10798//Base excision repair;NF-kappa B signaling pathway
1004	90	0	10	0	0	25	15	0	1	0	10	0	CDH6;cadherin 6, type 2, K-cadherin (fetal kidney)	GO:0005886//plasma membrane;GO:0070062//extracellular vesicular exosome;GO:0016021//integral component of membrane	GO:0007155//cell adhesion;GO:0034332//adherens junction organization;GO:0034329//cell junction assembly;GO:0007156//homophilic cell adhesion via plasma membrane adhesion molecules;GO:0045216//cell-cell junction organization	GO:0005509//calcium ion binding	-
10040	0	46	61	62	205	0	17	0	2	5	25	0	TOM1L1;target of myb1 (chicken)-like 1	GO:0010008//endosome membrane;GO:0005829//cytosol;GO:0070062//extracellular vesicular exosome;GO:0005795//Golgi stack;GO:0005768//endosome;GO:0005764//lysosome;GO:0005737//cytoplasm	GO:0007165//signal transduction;GO:0045839//negative regulation of mitosis;GO:0032147//activation of protein kinase activity;GO:0006886//intracellular protein transport;GO:0031954//positive regulation of protein autophosphorylation;GO:0043162//ubiquitin-dependent protein catabolic process via the multivesicular body sorting pathway;GO:2000278//regulation of DNA biosynthetic process	GO:0017124//SH3 domain binding;GO:0019901//protein kinase binding;GO:0005515//protein binding;GO:0043130//ubiquitin binding;GO:0030276//clathrin binding;GO:0030295//protein kinase activator activity	K12404//Lysosome
100419743	0	0	0	0	0	1	0	0	5	0	0	0	DBET;D4Z4 binding element transcript (non-protein coding)	-	-	-	-
10042	0	0	1	0	44	0	0	0	13	1	0	0	HMGXB4;HMG box domain containing 4	GO:0016589//NURF complex	GO:0008333//endosome to lysosome transport;GO:0016055//Wnt signaling pathway;GO:0030178//negative regulation of Wnt signaling pathway	GO:0003677//DNA binding	-
100420587	0	0	0	0	0	0	0	0	0	0	9	84	LOC100420587;SHC SH2-domain binding protein 1 pseudogene	-	-	-	-
100421577	0	0	0	0	0	0	3	0	33	0	0	0	FAM21EP;family with sequence similarity 21, member A pseudogene	-	-	-	K11447//Transcriptional misregulation in cancer;K00939//Metabolic pathways;Purine metabolism;Pyrimidine metabolism;Biosynthesis of secondary metabolites
100422556	0	0	0	0	0	0	0	0	0	0	4	0	LOC100422556;Leo1, Paf1/RNA polymerase II complex component, homolog (S. cerevisiae) pseudogene	-	-	-	-
100422826	0	0	0	0	0	0	0	0	0	0	5	0	MIR4274;microRNA 4274	-	-	-	-
100422828	0	0	0	0	0	0	0	0	2	0	0	0	MIR4287;microRNA 4287	-	-	-	-
100422847	0	0	0	0	0	0	0	0	15	0	0	0	MIR514B;microRNA 514b	-	-	-	-
100422849	0	0	0	0	0	0	0	0	24	0	0	0	MIR548T;microRNA 548t	-	-	-	-
100422850	0	0	0	0	0	0	3	0	0	0	0	0	MIR548V;microRNA 548v	-	-	-	-
100422854	105	0	0	0	0	2	0	0	14	0	0	0	MIR3187;microRNA 3187	-	-	-	-
100422855	0	0	0	0	0	0	0	0	5	0	0	0	MIR4301;microRNA 4301	-	-	-	-
100422857	0	0	0	0	0	0	19	0	13	0	0	0	MIR4318;microRNA 4318	-	-	-	-
100422858	29	0	0	0	0	0	0	0	0	0	0	0	MIR4285;microRNA 4285	-	-	-	-
100422865	0	0	0	0	0	0	0	0	12	0	0	0	MIR4320;microRNA 4320	-	-	-	-
100422868	0	0	0	0	0	0	0	0	5	0	0	0	MIR4270;microRNA 4270	-	-	-	-
100422869	0	0	0	0	0	8	0	0	0	0	0	0	MIR3152;microRNA 3152	-	-	-	-
100422871	0	0	0	0	0	1	0	0	0	0	0	0	MIR3117;microRNA 3117	-	-	-	-
100422873	0	0	0	0	0	0	0	0	1	0	0	0	MIR4297;microRNA 4297	-	-	-	-
100422874	0	0	0	0	0	0	0	0	10	0	0	237	MIR4279;microRNA 4279	-	-	-	-
100422877	0	0	0	0	0	0	5	0	0	0	0	0	MIR3202-2;microRNA 3202-2	-	-	-	-
100422879	0	0	0	18	29	0	0	0	0	0	8	0	MIR3124;microRNA 3124	-	-	-	-
100422896	0	0	0	0	0	0	0	0	4	0	0	0	MIR3140;microRNA 3140	-	-	-	-
100422899	0	0	0	0	0	0	0	0	11	0	0	0	MIR3190;microRNA 3190	-	-	-	-
100422903	0	0	0	0	0	5	0	0	0	0	0	0	MIR4288;microRNA 4288	-	-	-	-
100422911	0	0	0	0	0	23	0	0	0	0	0	0	MIR500B;microRNA 500b	-	-	-	-
100422918	0	0	0	0	0	0	0	0	7	0	0	0	MIR3167;microRNA 3167	-	-	-	-
100422924	0	0	0	0	0	0	0	0	12	0	0	0	MIR4303;microRNA 4303	-	-	-	-
100422926	0	0	0	0	0	0	17	0	0	0	0	0	MIR3137;microRNA 3137	-	-	-	-
100422928	91	0	0	0	0	0	0	0	0	0	0	0	MIR3127;microRNA 3127	-	-	-	-
100422933	0	0	0	0	0	0	0	28	0	0	0	0	MIR378B;microRNA 378b	-	-	-	-
100422942	0	0	0	0	0	0	0	0	22	0	0	0	MIR3133;microRNA 3133	-	-	-	-
100422944	0	0	0	0	0	0	0	0	12	0	3	0	MIR3186;microRNA 3186	-	-	-	-
100422946	0	0	0	0	0	0	0	0	15	0	0	0	MIR3116-2;microRNA 3116-2	-	-	-	-
100422948	0	0	0	0	0	4	0	0	0	0	0	0	MIR4284;microRNA 4284	-	-	-	-
100422952	0	0	0	0	13	0	0	0	0	0	19	0	MIR4271;microRNA 4271	-	-	-	-
100422953	0	0	0	0	0	0	0	0	12	0	0	0	MIR3165;microRNA 3165	-	-	-	-
100422955	0	0	0	24	55	0	0	0	0	0	25	0	MIR4273;microRNA 4273	-	-	-	-
100422957	0	0	0	0	0	0	0	1	0	0	0	0	MIR3131;microRNA 3131	-	-	-	-
100422964	0	0	0	0	0	0	0	0	11	0	0	0	MIR3150A;microRNA 3150a	-	-	-	-
100422966	0	0	0	0	0	0	0	0	0	0	9	0	MIR4277;microRNA 4277	-	-	-	-
100422969	0	0	0	0	0	0	0	0	6	0	0	0	MIR2909;microRNA 2909	-	-	-	-
100422978	0	403	123	242	280	0	0	0	0	0	147	0	MIR3185;microRNA 3185	-	-	-	-
100422980	65	0	0	0	0	0	0	0	0	0	0	0	MIR4323;microRNA 4323	-	-	-	-
100422986	0	0	0	0	36	0	0	0	0	0	0	0	MIR3125;microRNA 3125	-	-	-	-
100422991	0	0	0	18	60	5	51	0	9	0	24	0	MIR1260B;microRNA 1260b	-	-	-	-
100422992	0	0	0	0	0	0	0	0	1	0	0	0	MIR3151;microRNA 3151	-	-	-	-
100422994	0	0	0	0	0	0	0	0	21	0	0	0	MIR4267;microRNA 4267	-	-	-	-
100423009	0	0	0	0	0	0	0	0	0	0	3	0	MIR4329;microRNA 4329	-	-	-	-
100423015	0	0	0	0	0	0	0	0	30	0	0	0	MIR4289;microRNA 4289	-	-	-	-
100423028	0	0	0	0	0	0	0	0	16	0	0	0	MIR4254;microRNA 4254	-	-	-	-
100423033	129	0	0	0	0	0	0	0	3	0	0	0	MIR3158-2;microRNA 3158-2	-	-	-	-
100423036	0	0	0	0	0	0	0	0	22	0	7	0	MIR2355;microRNA 2355	-	-	-	-
100423039	0	0	0	0	0	0	22	0	0	0	0	0	MIR3132;microRNA 3132	-	-	-	-
100423040	10	0	0	0	0	0	0	0	1	0	0	0	MIR3166;microRNA 3166	-	-	-	-
100423041	0	0	0	0	0	0	0	0	1	0	0	0	MIR4296;microRNA 4296	-	-	-	-
100423062	0	0	0	0	0	0	48	0	24	0	16	0	IGLL5;immunoglobulin lambda-like polypeptide 5	GO:0070062//extracellular vesicular exosome	-	-	K06554//Primary immunodeficiency
10043	0	0	0	0	0	8	5	58	21	0	0	0	TOM1;target of myb1 (chicken)	GO:0070062//extracellular vesicular exosome;GO:0005769//early endosome;GO:0005768//endosome;GO:0016020//membrane;GO:0005829//cytosol;GO:0005737//cytoplasm	GO:0006897//endocytosis;GO:0015031//protein transport;GO:0016197//endosomal transport;GO:0006886//intracellular protein transport	GO:0030276//clathrin binding;GO:0005515//protein binding	K04705//Endocytosis;Jak-STAT signaling pathway;K12404//Lysosome
100431172	50	0	0	0	0	0	0	0	11	0	0	0	KLRF2;killer cell lectin-like receptor subfamily F, member 2	GO:0005887//integral component of plasma membrane	GO:0050663//cytokine secretion;GO:0043320//natural killer cell degranulation	GO:0005515//protein binding;GO:0042803//protein homodimerization activity;GO:0030246//carbohydrate binding	-
10044	178	0	0	0	0	7	5	63	14	0	0	0	SH2D3C;SH2 domain containing 3C	GO:0016020//membrane;GO:0005737//cytoplasm	GO:0009967//positive regulation of signal transduction;GO:0007254//JNK cascade;GO:0043547//positive regulation of GTPase activity;GO:0007264//small GTPase mediated signal transduction	GO:0005070//SH3/SH2 adaptor activity;GO:0005085//guanyl-nucleotide exchange factor activity;GO:0005515//protein binding	K08889//Adherens junction
10045	0	0	0	0	0	0	14	66	38	0	22	0	SH2D3A;SH2 domain containing 3A	-	GO:0009967//positive regulation of signal transduction;GO:0007254//JNK cascade;GO:0043547//positive regulation of GTPase activity;GO:0007264//small GTPase mediated signal transduction	GO:0005070//SH3/SH2 adaptor activity;GO:0005085//guanyl-nucleotide exchange factor activity	K07527//Axon guidance
10046	0	0	0	0	0	0	44	0	18	0	14	300	MAMLD1;mastermind-like domain containing 1	GO:0005634//nucleus	GO:0006351//transcription, DNA-templated;GO:0006357//regulation of transcription from RNA polymerase II promoter;GO:0008584//male gonad development	-	K06061//Notch signaling pathway
100462977	0	0	0	0	0	10	18	0	13	0	0	0	MTRNR2L1;MT-RNR2-like 1	GO:0005576//extracellular region;GO:0005737//cytoplasm	-	-	-
100462981	19	0	0	0	0	0	0	0	0	0	0	0	MTRNR2L2;MT-RNR2-like 2	GO:0005576//extracellular region;GO:0005737//cytoplasm	-	-	-
100462983	0	0	0	0	0	0	0	0	25	0	0	0	MTRNR2L3;MT-RNR2-like 3	GO:0005576//extracellular region;GO:0005737//cytoplasm	-	-	-
100463285	0	0	0	0	0	0	0	0	1	0	0	0	MTRNR2L4;MT-RNR2-like 4	GO:0005737//cytoplasm;GO:0005576//extracellular region	-	-	K00939//Metabolic pathways;Purine metabolism;Biosynthesis of secondary metabolites;Pyrimidine metabolism;K00797//Metabolic pathways;beta-Alanine metabolism;Glutathione metabolism;Arginine and proline metabolism;Ribosome;Cysteine and methionine metabolism;K11447//Transcriptional misregulation in cancer
100463289	0	0	0	0	0	10	0	0	1	0	0	0	MTRNR2L5;MT-RNR2-like 5	GO:0005576//extracellular region;GO:0005737//cytoplasm	-	-	K00797//Arginine and proline metabolism;Glutathione metabolism;Cysteine and methionine metabolism;Ribosome;beta-Alanine metabolism;Metabolic pathways;K01539//Carbohydrate digestion and absorption;Salivary secretion;Protein digestion and absorption;Cardiac muscle contraction;Endocrine and other factor-regulated calcium reabsorption;Mineral absorption;Pancreatic secretion;Aldosterone-regulated sodi…
100463482	0	0	0	0	0	0	0	0	12	0	0	0	MTRNR2L6;MT-RNR2-like 6	GO:0005576//extracellular region;GO:0005737//cytoplasm	-	-	-
100463486	0	0	0	0	27	0	0	0	17	0	0	0	MTRNR2L8;MT-RNR2-like 8	GO:0005576//extracellular region;GO:0005737//cytoplasm	-	-	-
100463487	0	0	0	0	0	0	0	0	1	0	0	0	MTRNR2L9;MT-RNR2-like 9 (pseudogene)	GO:0005737//cytoplasm;GO:0005576//extracellular region	-	-	-
100463488	0	0	0	0	0	5	0	0	14	0	0	0	MTRNR2L10;MT-RNR2-like 10	GO:0005576//extracellular region;GO:0005737//cytoplasm	-	-	-
10047	0	0	0	0	0	0	0	42	0	0	0	0	CST8;cystatin 8 (cystatin-related epididymal specific)	GO:0005737//cytoplasm;GO:0009986//cell surface;GO:0005576//extracellular region	GO:0010951//negative regulation of endopeptidase activity	GO:0004869//cysteine-type endopeptidase inhibitor activity	-
10048	0	1	101	74	118	11	31	0	8	0	0	0	RANBP9;RAN binding protein 9	GO:0005829//cytosol;GO:0005875//microtubule associated complex;GO:0005634//nucleus	GO:0007020//microtubule nucleation;GO:0006461//protein complex assembly;GO:0007411//axon guidance	GO:0019899//enzyme binding;GO:0008536//Ran GTPase binding;GO:0005515//protein binding	-
10049	0	0	0	9	69	0	0	0	13	0	0	0	DNAJB6;DnaJ (Hsp40) homolog, subfamily B, member 6	GO:0005829//cytosol;GO:0016020//membrane;GO:0005730//nucleolus;GO:0030018//Z disc;GO:0048471//perinuclear region of cytoplasm;GO:0005634//nucleus;GO:0005737//cytoplasm	GO:0045109//intermediate filament organization;GO:0090084//negative regulation of inclusion body assembly;GO:0032781//positive regulation of ATPase activity;GO:0006457//protein folding;GO:0043154//negative regulation of cysteine-type endopeptidase activity involved in apoptotic process	GO:0005515//protein binding;GO:0001671//ATPase activator activity;GO:0051082//unfolded protein binding;GO:0031072//heat shock protein binding;GO:0051087//chaperone binding	-
100499466	201	0	0	0	18	0	23	0	36	0	5	0	LINC00674;long intergenic non-protein coding RNA 674	-	-	-	K11247//Endocytosis
100499483	0	0	0	0	0	0	0	0	0	0	5	0	CCDC180;coiled-coil domain containing 180	GO:0070062//extracellular vesicular exosome;GO:0016021//integral component of membrane	-	-	-
100499484	24	0	0	0	0	0	29	0	0	0	0	0	LOC100499484;SUGT1-1300002K09Rik pseudogene	-	-	-	K12795//NOD-like receptor signaling pathway;Plant-pathogen interaction
1005	103	0	0	0	0	10	26	0	40	0	9	1	CDH7;cadherin 7, type 2	GO:0005886//plasma membrane;GO:0016021//integral component of membrane	GO:0034332//adherens junction organization;GO:0016337//single organismal cell-cell adhesion;GO:0034329//cell junction assembly;GO:0007156//homophilic cell adhesion via plasma membrane adhesion molecules;GO:0045216//cell-cell junction organization	GO:0005509//calcium ion binding	-
10050	0	0	0	0	0	11	34	0	22	0	10	0	SLC17A4;solute carrier family 17, member 4	GO:0005887//integral component of plasma membrane;GO:0016324//apical plasma membrane;GO:0016020//membrane	GO:0035725//sodium ion transmembrane transport;GO:0006796//phosphate-containing compound metabolic process;GO:0035435//phosphate ion transmembrane transport;GO:0006814//sodium ion transport	GO:0005436//sodium:phosphate symporter activity	-
100500804	0	4	0	1	0	0	0	0	0	0	0	0	MIR3654;microRNA 3654	-	-	-	-
100500813	0	0	0	0	0	13	0	0	9	0	0	0	MIR3646;microRNA 3646	-	-	-	-
100500815	135	0	0	0	0	95	61	117	132	194	5	706	MIR3687-1;microRNA 3687-1	-	-	-	-
100500824	0	65	138	137	112	0	0	85	0	0	197	0	MIR3650;microRNA 3650	-	-	-	-
100500829	4	0	0	0	0	0	0	0	0	0	0	0	MIR3943;microRNA 3943	-	-	-	-
100500841	0	0	0	0	0	0	0	0	25	0	0	0	MIR3678;microRNA 3678	-	-	-	-
100500845	0	0	0	0	0	0	0	0	2	0	0	0	MIR642B;microRNA 642b	-	-	-	-
100500850	0	0	0	0	0	22	0	0	0	0	0	0	MIR3682;microRNA 3682	-	-	-	-
100500851	0	0	37	56	79	0	0	0	10	0	185	0	MIR3918;microRNA 3918	-	-	-	-
100500856	39	0	0	0	0	0	0	0	0	0	0	0	MIR548Z;microRNA 548z	-	-	-	-
100500859	0	0	0	0	0	0	0	0	10	0	0	0	MIR3921;microRNA 3921	-	-	-	-
100500861	0	2	0	11	14	0	0	98	0	0	35	0	MIR3665;microRNA 3665	-	-	-	-
100500862	2	0	0	0	0	42	90	71	24	9	4	298	MIR3648-1;microRNA 3648-1	-	-	-	-
100500866	0	0	0	0	0	0	17	0	0	0	0	0	MIR3941;microRNA 3941	-	-	-	-
100500871	0	0	0	0	0	7	0	0	13	0	0	0	MIR3622B;microRNA 3622b	-	-	-	-
100500872	0	0	0	20	17	0	0	0	0	0	27	0	MIR3911;microRNA 3911	-	-	-	-
100500876	0	0	0	0	0	1	0	0	18	0	0	0	MIR3675;microRNA 3675	-	-	-	-
100500878	0	0	0	0	0	0	0	0	9	0	0	0	MIR3679;microRNA 3679	-	-	-	-
100500894	0	0	0	0	0	1	0	0	0	0	0	0	MIR3690;microRNA 3690	-	-	-	-
100500895	0	0	0	0	0	0	0	0	15	0	0	0	MIR548AA2;microRNA 548aa-2	-	-	-	-
100500896	0	0	0	0	0	0	18	0	10	0	0	0	MIR3666;microRNA 3666	-	-	-	-
100500900	0	0	0	0	0	0	12	0	0	0	0	0	MIR3691;microRNA 3691	-	-	-	-
100500905	0	378	81	466	787	0	0	56	37	0	768	1	MIR3661;microRNA 3661	-	-	-	K03094//Circadian rhythm - mammal;TGF-beta signaling pathway;Ubiquitin mediated proteolysis;Cell cycle;Cell cycle - yeast;Herpes simplex infection;Protein processing in endoplasmic reticulum;Oocyte meiosis;Wnt signaling pathway;K04382//Oocyte meiosis;Wnt signaling pathway;Hepatitis C;mRNA surveillance pathway;Cell cycle - yeast;Tight junction;Dopaminergic synapse;Chagas disease (American trypanos…
100500919	0	0	0	0	0	0	12	0	0	0	0	0	MIR548Y;microRNA 548y	-	-	-	-
100505475	0	36	0	7	0	0	0	0	0	0	0	0	SYNE1-AS1;SYNE1 antisense RNA 1	-	-	-	-
100505536	0	0	0	0	0	0	0	0	0	26	0	0	ISM1-AS1;ISM1 antisense RNA 1	-	-	-	-
100505549	0	45	42	109	103	0	15	0	0	0	58	0	LOC100505549;uncharacterized LOC100505549	-	-	-	K00939//Biosynthesis of secondary metabolites;Pyrimidine metabolism;Purine metabolism;Metabolic pathways;K00591//Ubiquinone and other terpenoid-quinone biosynthesis;Biosynthesis of secondary metabolites;Metabolic pathways;K01539//Pancreatic secretion;Mineral absorption;Endocrine and other factor-regulated calcium reabsorption;Aldosterone-regulated sodium reabsorption;Carbohydrate digestion and ab…
100505576	30	0	0	0	0	3	0	0	10	0	0	0	LINC00672;long intergenic non-protein coding RNA 672	-	-	-	K11447//Transcriptional misregulation in cancer;K00939//Metabolic pathways;Purine metabolism;Pyrimidine metabolism;Biosynthesis of secondary metabolites
100505591	0	0	0	0	0	0	0	0	14	1	0	0	LRRC3C;leucine rich repeat containing 3C	GO:0016021//integral component of membrane	-	-	K06850//Axon guidance
100505636	73	0	0	0	0	0	27	0	0	0	0	0	LINC01024;long intergenic non-protein coding RNA 1024	-	-	-	-
100505641	0	1	0	0	0	0	0	0	13	153	0	0	FGD5-AS1;FGD5 antisense RNA 1	-	-	-	K11433//Lysine degradation
100505679	0	0	0	0	0	0	0	0	9	0	0	0	UBE2Q2L;ubiquitin-conjugating enzyme E2Q family member 2-like	-	-	-	K10582//Ubiquitin mediated proteolysis
100505696	320	202	0	29	122	0	80	158	39	2	87	306	SH3BP5-AS1;SH3BP5 antisense RNA 1	-	-	-	-
100505724	0	0	0	0	0	0	21	0	0	0	0	0	KRTAP9-7;keratin associated protein 9-7	GO:0045095//keratin filament	-	-	-
100505738	0	0	0	0	1	28	18	0	5	0	0	0	MIR4458HG;MIR4458 host gene (non-protein coding)	-	-	-	-
100505746	0	0	0	0	0	0	69	0	24	29	0	0	ITGB2-AS1;ITGB2 antisense RNA 1	-	-	-	-
100505753	0	0	0	0	0	0	0	0	3	0	1	0	KRTAP16-1;keratin associated protein 16-1	GO:0045095//keratin filament	-	-	K02599//Dorso-ventral axis formation;Notch signaling pathway;Prion diseases;K06252//Focal adhesion;ECM-receptor interaction
100505876	0	0	0	39	120	0	0	0	8	0	0	0	CEBPZOS;CEBPZ opposite strand	-	-	-	K00939//Pyrimidine metabolism;Biosynthesis of secondary metabolites;Purine metabolism;Metabolic pathways;K11447//Transcriptional misregulation in cancer
100505879	11	0	0	0	0	0	0	0	0	0	0	0	KIF25-AS1;KIF25 antisense RNA 1	-	-	-	-
100505881	0	0	0	0	18	0	0	0	0	0	0	0	MAGI2-AS3;MAGI2 antisense RNA 3	-	-	-	K05629//Tight junction;K00939//Purine metabolism;Pyrimidine metabolism;Biosynthesis of secondary metabolites;Metabolic pathways;K11447//Transcriptional misregulation in cancer
100505989	0	51	0	21	25	0	0	0	0	0	0	0	LINC01207;long intergenic non-protein coding RNA 1207	-	-	-	K00939//Biosynthesis of secondary metabolites;Pyrimidine metabolism;Purine metabolism;Metabolic pathways;K11447//Transcriptional misregulation in cancer
100506012	0	0	0	0	0	1	0	0	0	0	0	0	PPP5D1;PPP5 tetratricopeptide repeat domain containing 1	-	-	-	K04460//MAPK signaling pathway
100506033	0	108	3	187	244	0	0	18	0	3	269	167	PTOV1-AS1;PTOV1 antisense RNA 1	-	-	-	K11447//Transcriptional misregulation in cancer;K00939//Metabolic pathways;Biosynthesis of secondary metabolites;Pyrimidine metabolism;Purine metabolism;K00591//Metabolic pathways;Ubiquinone and other terpenoid-quinone biosynthesis;Biosynthesis of secondary metabolites
100506049	0	0	0	0	0	21	0	0	13	0	0	0	LRRC72;leucine rich repeat containing 72	-	-	-	K11092//Spliceosome
100506060	0	0	0	0	0	10	0	0	4	0	0	113	SMG1P7;SMG1 pseudogene 7	-	-	-	K08873//mRNA surveillance pathway
100506071	0	0	0	0	13	0	0	0	8	0	0	0	LOC100506071;uncharacterized LOC100506071	-	-	-	K08132//Protein digestion and absorption
100506127	0	0	0	0	0	0	0	0	24	0	0	0	LOC100506127;putative uncharacterized protein FLJ37770-like	-	-	-	K00939//Metabolic pathways;Purine metabolism;Pyrimidine metabolism;Biosynthesis of secondary metabolites;K11447//Transcriptional misregulation in cancer
100506144	0	0	0	0	0	1	0	0	19	0	4	0	ZMYM6NB;ZMYM6 neighbor	GO:0016021//integral component of membrane	-	-	-
100506233	0	18	0	5	0	0	0	0	6	0	0	0	RAB30-AS1;RAB30 antisense RNA 1 (head to head)	-	-	-	-
100506237	0	0	0	0	0	0	0	0	14	0	0	0	NKX2-1-AS1;NKX2-1 antisense RNA 1	-	-	-	-
100506271	0	0	0	0	0	14	0	0	9	0	0	0	LOC100506271;uncharacterized LOC100506271	-	-	-	-
100506365	0	0	0	4	48	9	0	46	64	0	8	0	OTUD6B-AS1;OTUD6B antisense RNA 1 (head to head)	-	-	-	-
100506422	0	0	0	0	0	23	1	0	51	0	10	0	LOC100506422;putative deoxyuridine 5'-triphosphate nucleotidohydrolase-like protein FLJ16323	-	GO:0046080//dUTP metabolic process	GO:0016787//hydrolase activity	-
100506540	0	285	20	446	518	0	35	0	11	0	434	0	SPTY2D1-AS1;SPTY2D1 antisense RNA 1	-	-	-	-
100506581	0	0	0	0	0	0	9	0	0	0	6	0	C16orf95;chromosome 16 open reading frame 95	-	-	-	-
100506585	0	0	0	0	0	0	0	0	0	1	0	223	LOC100506585;uncharacterized LOC100506585	-	-	-	-
100506606	0	0	0	0	0	0	38	0	14	0	0	0	LOC100506606;uncharacterized LOC100506606	-	-	-	K13356//Peroxisome;Cutin, suberine and wax biosynthesis
100506627	0	24	63	0	0	0	0	71	68	0	3	0	DCDC5;doublecortin domain containing 5	-	GO:0035556//intracellular signal transduction	-	K11447//Transcriptional misregulation in cancer;K01875//Metabolic pathways;Aminoacyl-tRNA biosynthesis;Biotin metabolism;Arginine and proline metabolism;K00939//Metabolic pathways;Biosynthesis of secondary metabolites;Pyrimidine metabolism;Purine metabolism
100506649	158	118	54	71	262	5	0	1	19	1	711	0	PXN-AS1;PXN antisense RNA 1	-	-	-	K05760//Bacterial invasion of epithelial cells;Regulation of actin cytoskeleton;Chemokine signaling pathway;VEGF signaling pathway;Leukocyte transendothelial migration;Focal adhesion
100506650	0	0	0	0	0	9	0	0	3	0	0	0	C17orf112;chromosome 17 open reading frame 112	-	-	-	-
100506658	0	0	0	0	0	0	10	0	4	0	28	0	OCLN;occludin	GO:0030139//endocytic vesicle;GO:0005829//cytosol;GO:0005923//tight junction;GO:0016021//integral component of membrane;GO:0005886//plasma membrane;GO:0030054//cell junction;GO:0031410//cytoplasmic vesicle;GO:0016324//apical plasma membrane;GO:0005911//cell-cell junction;GO:0016327//apicolateral plasma membrane	GO:0006921//cellular component disassembly involved in execution phase of apoptosis;GO:0070830//tight junction assembly;GO:0045216//cell-cell junction organization;GO:0032259//methylation;GO:0046498//S-adenosylhomocysteine metabolic process;GO:0006461//protein complex assembly;GO:0046500//S-adenosylmethionine metabolic process;GO:0006915//apoptotic process	GO:0019904//protein domain specific binding;GO:0008119//thiopurine S-methyltransferase activity;GO:0005515//protein binding;GO:0005198//structural molecule activity	K06088//Leukocyte transendothelial migration;Pathogenic Escherichia coli infection;Hepatitis C;Tight junction;Cell adhesion molecules (CAMs)
100506660	0	0	0	0	0	0	29	0	6	0	0	0	DDX11-AS1;DDX11 antisense RNA 1	-	-	-	-
100506680	0	0	0	0	0	0	0	0	37	0	0	0	SACS-AS1;SACS antisense RNA 1	-	-	-	-
100506710	0	23	0	46	76	0	0	0	21	0	15	0	EBLN3;endogenous Bornavirus-like nucleoprotein 3	-	-	-	-
100506714	0	0	0	0	0	16	0	0	0	0	0	0	NUP50-AS1;NUP50 antisense RNA 1 (head to head)	-	-	-	-
100506736	0	0	0	0	0	0	0	36	7	0	0	0	SLFN12L;schlafen family member 12-like	GO:0016021//integral component of membrane	-	GO:0005524//ATP binding	-
100506742	245	0	0	0	0	0	0	0	15	0	21	0	CASP12;caspase 12 (gene/pseudogene)	GO:0097169//AIM2 inflammasome complex;GO:0005737//cytoplasm;GO:0072559//NLRP3 inflammasome complex;GO:0072557//IPAF inflammasome complex	GO:0097194//execution phase of apoptosis;GO:0050727//regulation of inflammatory response;GO:0042981//regulation of apoptotic process;GO:0030968//endoplasmic reticulum unfolded protein response;GO:0006508//proteolysis;GO:0070059//intrinsic apoptotic signaling pathway in response to endoplasmic reticulum stress	GO:0004197//cysteine-type endopeptidase activity	K04741//Protein processing in endoplasmic reticulum;Prion diseases;Apoptosis;Amyotrophic lateral sclerosis (ALS);Alzheimer's disease
100506747	0	0	0	0	0	0	22	0	14	0	0	0	LOC100506747;alpha-1,3-mannosyl-glycoprotein 4-beta-N-acetylglucosaminyltransferase-like protein LOC641515 homolog	-	-	-	K13748//N-Glycan biosynthesis;Metabolic pathways
100506759	0	0	0	0	0	0	0	0	3	0	0	0	OR7E37P;olfactory receptor, family 7, subfamily E, member 37 pseudogene	-	-	-	K04257//Olfactory transduction
100506826	0	0	0	11	0	0	0	0	0	0	1	0	MYLK-AS1;MYLK antisense RNA 1	-	-	-	K00907//Vascular smooth muscle contraction;Regulation of actin cytoskeleton;Focal adhesion;Gastric acid secretion;Calcium signaling pathway
100506866	0	0	49	0	36	27	2	0	73	0	38	0	TTN-AS1;TTN antisense RNA 1	-	-	-	K12567//Dilated cardiomyopathy;Hypertrophic cardiomyopathy (HCM)
100506994	0	0	0	0	0	15	0	0	11	0	0	0	PTPRG-AS1;PTPRG antisense RNA 1	-	-	-	K11447//Transcriptional misregulation in cancer;K00939//Purine metabolism;Biosynthesis of secondary metabolites;Pyrimidine metabolism;Metabolic pathways
100507003	0	0	0	0	0	1	0	0	1	0	0	0	GFY;golgi-associated, olfactory signaling regulator	GO:0030173//integral component of Golgi membrane	GO:0050896//response to stimulus;GO:0060271//cilium morphogenesis;GO:0007608//sensory perception of smell	-	K09187//Lysine degradation;K04574//Amyotrophic lateral sclerosis (ALS)
100507034	23	333	357	314	690	0	21	44	17	1	581	0	PITRM1-AS1;PITRM1 antisense RNA 1	-	-	-	-
100507043	0	0	0	0	0	0	0	1	18	0	0	0	TUNAR;TCL1 upstream neural differentiation-associated RNA	-	-	-	-
100507055	0	0	0	0	0	0	0	0	14	0	0	0	LRCOL1;leucine rich colipase-like 1	GO:0005576//extracellular region	GO:0007586//digestion;GO:0043085//positive regulation of catalytic activity;GO:0016042//lipid catabolic process	GO:0008047//enzyme activator activity	-
100507096	0	0	0	0	0	19	0	0	21	0	0	0	GIMD1;GIMAP family P-loop NTPase domain containing 1	-	-	GO:0005525//GTP binding	-
100507156	0	0	0	0	0	11	16	0	28	0	11	0	LOC100507156;uncharacterized LOC100507156	-	-	-	K11447//Transcriptional misregulation in cancer
100507178	2	480	826	337	546	59	164	1951	350	1	863	327	SLFNL1-AS1;SLFNL1 antisense RNA 1	-	-	-	K11447//Transcriptional misregulation in cancer
100507203	0	0	0	0	0	0	0	0	42	39	0	0	SMLR1;small leucine-rich protein 1	GO:0016021//integral component of membrane	-	-	-
100507246	0	2	0	56	146	1	0	0	0	0	0	0	SNHG16;small nucleolar RNA host gene 16 (non-protein coding)	-	-	-	K00939//Metabolic pathways;Pyrimidine metabolism;Biosynthesis of secondary metabolites;Purine metabolism;K00797//Ribosome;Cysteine and methionine metabolism;Glutathione metabolism;Arginine and proline metabolism;beta-Alanine metabolism;Metabolic pathways
100507290	0	1	0	0	0	0	0	0	12	30	0	212	ZNF865;zinc finger protein 865	GO:0005634//nucleus	GO:0006351//transcription, DNA-templated;GO:0006355//regulation of transcription, DNA-templated	GO:0046872//metal ion binding;GO:0003677//DNA binding	-
100507321	0	0	0	24	0	0	0	13	32	0	5	0	ERVK13-1;endogenous retrovirus group K13, member 1	GO:0016021//integral component of membrane;GO:0019031//viral envelope;GO:0005886//plasma membrane	-	GO:0005198//structural molecule activity	K07987//Natural killer cell mediated cytotoxicity;K00709//Metabolic pathways;Glycosphingolipid biosynthesis - lacto and neolacto series
100507331	65	401	87	451	892	0	20	555	138	230	1272	0	ZSWIM8-AS1;ZSWIM8 antisense RNA 1	-	-	-	-
100507346	0	0	0	37	70	0	0	0	16	0	37	0	LOC100507346;uncharacterized LOC100507346	-	-	-	K06225//Basal cell carcinoma;Pathways in cancer;Hedgehog signaling pathway
100507347	94	3432	429	1830	2729	0	207	8868	201	433	3741	6	VIM-AS1;VIM antisense RNA 1	-	-	-	K07606//Epstein-Barr virus infection
100507412	3043	32	212	11	58	881	1149	2106	2222	6158	441	5590	LOC100507412;uncharacterized LOC100507412	-	-	-	K00939//Pyrimidine metabolism;Biosynthesis of secondary metabolites;Purine metabolism;Metabolic pathways;K11447//Transcriptional misregulation in cancer
100507421	88	0	0	15	25	0	25	0	86	0	33	12	TMEM178B;transmembrane protein 178B	GO:0016021//integral component of membrane	-	-	-
100507435	0	0	0	0	0	0	0	36	6	0	0	0	DLGAP2-AS1;DLGAP2 antisense RNA 1	-	-	-	-
100507436	0	0	1	14	5	2	0	4	0	18	34	2	MICA;MHC class I polypeptide-related sequence A	GO:0005615//extracellular space;GO:0009986//cell surface;GO:0005887//integral component of plasma membrane;GO:0005737//cytoplasm	GO:0009408//response to heat;GO:0019835//cytolysis;GO:0019882//antigen processing and presentation;GO:0001913//T cell mediated cytotoxicity;GO:0042742//defense response to bacterium;GO:0046629//gamma-delta T cell activation;GO:0006974//cellular response to DNA damage stimulus;GO:0016032//viral process;GO:0051607//defense response to virus;GO:0002418//immune response to tumor cell;GO:0042267//natu…	GO:0046703//natural killer cell lectin-like receptor binding;GO:0030881//beta-2-microglobulin binding;GO:0005515//protein binding	K07985//Natural killer cell mediated cytotoxicity
100507463	0	0	0	0	0	0	0	0	2	0	0	0	PSMB8-AS1;PSMB8 antisense RNA 1 (head to head)	-	-	-	K05653//ABC transporters;Phagosome;Herpes simplex infection;Primary immunodeficiency;Antigen processing and presentation
100507495	0	12	0	14	8	0	0	0	0	0	60	0	SDCBP2-AS1;SDCBP2 antisense RNA 1	-	-	-	-
100507500	181	18	0	19	27	18	0	0	11	0	67	1	EGFR-AS1;EGFR antisense RNA 1	-	-	-	K04361//Calcium signaling pathway;MAPK signaling pathway - fly;Non-small cell lung cancer;Endometrial cancer;Melanoma;Regulation of actin cytoskeleton;Hepatitis C;Glioma;Dorso-ventral axis formation;Focal adhesion;GnRH signaling pathway;Pathways in cancer;Gap junction;Endocytosis;Pancreatic cancer;Prostate cancer;MAPK signaling pathway;Cytokine-cytokine receptor interaction;Bladder cancer;Adheren…
100507527	0	0	0	0	0	0	32	0	12	0	0	0	THEG5;testis highly expressed protein 5	-	-	-	-
100507537	0	0	0	0	0	0	0	0	12	0	0	0	LOC100507537;uncharacterized LOC100507537	-	-	-	-
100507547	0	0	0	0	0	0	0	0	0	0	21	0	LOC100507547;uncharacterized LOC100507547	-	-	-	-
100507577	0	191	127	240	337	11	0	225	28	142	274	0	LOC100507577;uncharacterized LOC100507577	-	-	-	K04506//p53 signaling pathway;Ubiquitin mediated proteolysis;Wnt signaling pathway
100507588	0	0	0	0	17	0	38	0	0	0	10	0	TGFBR3L;transforming growth factor, beta receptor III-like	GO:0016021//integral component of membrane	-	-	K04431//Epstein-Barr virus infection;ErbB signaling pathway;Neurotrophin signaling pathway;Protein processing in endoplasmic reticulum;Osteoclast differentiation;T cell receptor signaling pathway;MAPK signaling pathway;Influenza A;Toll-like receptor signaling pathway;Fc epsilon RI signaling pathway;GnRH signaling pathway
100507600	0	0	0	0	0	0	14	0	0	0	0	0	LOC100507600;uncharacterized LOC100507600	-	-	-	-
100507607	1	0	0	0	0	1	0	73	7	0	0	0	NPIPB9;nuclear pore complex interacting protein family, member B9	-	-	-	K01896//Lipoic acid metabolism;Metabolic pathways;Butanoate metabolism
100507650	57	8	150	128	89	0	0	68	10	1	78	0	RNF212B;ring finger protein 212B	-	-	GO:0008270//zinc ion binding	-
100507661	0	0	0	0	0	0	0	0	0	0	9	0	LOC100507661;uncharacterized LOC100507661	-	-	-	-
100507679	0	0	0	0	0	0	0	40	31	0	0	0	MUC22;mucin 22	GO:0016021//integral component of membrane	-	-	K06252//ECM-receptor interaction;Focal adhesion
10051	72	0	0	30	10	52	41	0	16	0	0	0	SMC4;structural maintenance of chromosomes 4	GO:0005730//nucleolus;GO:0000796//condensin complex;GO:0005829//cytosol;GO:0005737//cytoplasm;GO:0005634//nucleus;GO:0005654//nucleoplasm	GO:0045132//meiotic chromosome segregation;GO:0051383//kinetochore organization;GO:0000278//mitotic cell cycle;GO:0010032//meiotic chromosome condensation;GO:0007076//mitotic chromosome condensation;GO:0000070//mitotic sister chromatid segregation	GO:0046982//protein heterodimerization activity;GO:0005515//protein binding;GO:0005524//ATP binding	K06675//Cell cycle - yeast
10052	0	0	0	0	0	24	32	0	12	0	14	0	GJC1;gap junction protein, gamma 1, 45kDa	GO:0016021//integral component of membrane;GO:0005886//plasma membrane;GO:0014704//intercalated disc;GO:0005789//endoplasmic reticulum membrane;GO:0005922//connexon complex;GO:0005921//gap junction	GO:0048738//cardiac muscle tissue development;GO:0007268//synaptic transmission;GO:0061024//membrane organization;GO:0086014//atrial cardiac muscle cell action potential;GO:0006936//muscle contraction;GO:0034220//ion transmembrane transport;GO:0006810//transport;GO:0007601//visual perception;GO:0007043//cell-cell junction assembly;GO:0001570//vasculogenesis;GO:0048468//cell development;GO:0016264…	GO:0005243//gap junction channel activity;GO:0005216//ion channel activity	-
100526767	0	0	0	0	7	0	0	0	0	0	0	0	RNF103-CHMP3;RNF103-CHMP3 readthrough	-	-	-	K12193//Endocytosis
100526773	0	0	0	0	0	0	0	0	2	0	0	0	EPPIN-WFDC6;EPPIN-WFDC6 readthrough	-	-	-	K02268//Huntington's disease;Parkinson's disease;Oxidative phosphorylation;Alzheimer's disease;Metabolic pathways;Cardiac muscle contraction
100526833	0	0	0	0	0	66	16	0	11	110	0	0	SEPT5-GP1BB;SEPT5-GP1BB readthrough	-	-	-	K04557//Parkinson's disease
100527960	0	0	0	0	0	0	0	0	18	0	0	0	MROH7-TTC4;MROH7-TTC4 readthrough (NMD candidate)	-	-	-	K09553//Prion diseases
100527964	2	0	35	0	0	6	0	0	12	0	0	222	LHX4-AS1;LHX4 antisense RNA 1	-	-	-	-
100527978	0	0	0	0	0	0	0	0	7	0	0	0	TMEM56-RWDD3;TMEM56-RWDD3 readthrough	-	-	-	-
100528018	0	0	0	0	14	0	0	0	0	0	0	0	ARL2-SNX15;ARL2-SNX15 readthrough (NMD candidate)	-	-	-	-
100528032	0	0	0	0	0	13	0	0	0	0	0	0	KLRC4-KLRK1;KLRC4-KLRK1 readthrough	GO:0009986//cell surface;GO:0016021//integral component of membrane;GO:0005886//plasma membrane;GO:0005887//integral component of plasma membrane	GO:0030101//natural killer cell activation;GO:0007165//signal transduction;GO:0045954//positive regulation of natural killer cell mediated cytotoxicity;GO:0031295//T cell costimulation;GO:0050776//regulation of immune response;GO:0030154//cell differentiation;GO:0045087//innate immune response	GO:0004872//receptor activity;GO:0005515//protein binding;GO:0030246//carbohydrate binding	K06728//Malaria;Natural killer cell mediated cytotoxicity
100529207	0	0	0	0	0	0	0	0	12	0	0	0	RAD51L3-RFFL;RAD51L3-RFFL readthrough	-	-	-	K10871//Homologous recombination
100529209	0	0	0	0	0	0	0	0	0	0	7	0	RNASEK-C17orf49;RNASEK-C17orf49 readthrough	-	-	-	-
100529261	0	0	0	0	0	0	0	0	0	0	4	0	CHURC1-FNTB;CHURC1-FNTB readthrough	-	-	-	K05954//Terpenoid backbone biosynthesis
100532724	0	0	0	0	0	0	0	0	0	0	0	113	NPHP3-ACAD11;NPHP3-ACAD11 readthrough (NMD candidate)	-	-	-	-
100533177	0	0	0	0	0	0	0	0	6	0	0	0	KRTAP29-1;keratin associated protein 29-1	GO:0045095//keratin filament	-	-	K02599//Prion diseases;Dorso-ventral axis formation;Notch signaling pathway
100533195	0	0	0	0	0	0	20	0	0	0	0	0	FAM24B-CUZD1;FAM24B-CUZD1 readthrough	-	-	-	K13912//Salivary secretion
100533955	0	0	0	0	0	0	3	0	0	0	0	0	SENP3-EIF4A1;SENP3-EIF4A1 readthrough (NMD candidate)	-	-	-	-
100533970	0	525	204	312	454	0	0	367	123	178	424	0	P2RX5-TAX1BP3;P2RX5-TAX1BP3 readthrough (NMD candidate)	-	-	-	K05219//Neuroactive ligand-receptor interaction;Calcium signaling pathway
100534593	0	0	0	0	0	0	0	0	0	0	2	0	STX16-NPEPL1;STX16-NPEPL1 readthrough (NMD candidate)	-	-	-	-
100534611	0	0	0	0	0	0	0	0	12	0	0	0	TM4SF19-TCTEX1D2;TM4SF19-TCTEX1D2 readthrough (NMD candidate)	-	-	-	-
100534612	0	0	0	0	0	0	21	0	0	0	0	0	C1QTNF3-AMACR;C1QTNF3-AMACR readthrough (NMD candidate)	-	-	-	K01796//Metabolic pathways;Primary bile acid biosynthesis;Peroxisome
10054	79	7	0	34	102	22	0	0	42	0	0	0	UBA2;ubiquitin-like modifier activating enzyme 2	GO:0005829//cytosol;GO:0031510//SUMO activating enzyme complex;GO:0005654//nucleoplasm	GO:0019950//SMT3-dependent protein catabolic process;GO:0043085//positive regulation of catalytic activity;GO:0016925//protein sumoylation;GO:0043687//post-translational protein modification;GO:0044267//cellular protein metabolic process	GO:0005515//protein binding;GO:0046872//metal ion binding;GO:0046982//protein heterodimerization activity;GO:0008134//transcription factor binding;GO:0019948//SUMO activating enzyme activity;GO:0016874//ligase activity;GO:0005524//ATP binding;GO:0008047//enzyme activator activity	K10685//Ubiquitin mediated proteolysis
10055	0	2	0	8	21	0	6	0	25	0	6	0	SAE1;SUMO1 activating enzyme subunit 1	GO:0005730//nucleolus;GO:0043231//intracellular membrane-bounded organelle;GO:0005829//cytosol;GO:0005634//nucleus;GO:0005654//nucleoplasm	GO:0016567//protein ubiquitination;GO:0007346//regulation of mitotic cell cycle;GO:0044267//cellular protein metabolic process;GO:0016925//protein sumoylation;GO:0043687//post-translational protein modification;GO:0019950//SMT3-dependent protein catabolic process;GO:0043085//positive regulation of catalytic activity	GO:0008022//protein C-terminus binding;GO:0008047//enzyme activator activity;GO:0004839//ubiquitin activating enzyme activity;GO:0019948//SUMO activating enzyme activity;GO:0043008//ATP-dependent protein binding;GO:0005515//protein binding;GO:0046982//protein heterodimerization activity	K10684//Ubiquitin mediated proteolysis
10056	0	0	1	12	50	0	0	0	36	124	0	0	FARSB;phenylalanyl-tRNA synthetase, beta subunit	GO:0005829//cytosol;GO:0016020//membrane;GO:0005737//cytoplasm	GO:0010467//gene expression;GO:0006418//tRNA aminoacylation for protein translation;GO:0006432//phenylalanyl-tRNA aminoacylation;GO:0006412//translation	GO:0004826//phenylalanine-tRNA ligase activity;GO:0003723//RNA binding;GO:0005524//ATP binding;GO:0000287//magnesium ion binding	K01890//Bacterial secretion system;Aminoacyl-tRNA biosynthesis;ABC transporters
10057	0	21	1	0	2	18	42	32	101	116	21	0	ABCC5;ATP-binding cassette, sub-family C (CFTR/MRP), member 5	GO:0005887//integral component of plasma membrane;GO:0005886//plasma membrane;GO:0016020//membrane	GO:0055085//transmembrane transport;GO:0015711//organic anion transport;GO:0030213//hyaluronan biosynthetic process;GO:0006810//transport;GO:0030212//hyaluronan metabolic process;GO:0030203//glycosaminoglycan metabolic process;GO:0006200//ATP catabolic process;GO:0044281//small molecule metabolic process;GO:0005975//carbohydrate metabolic process	GO:0042626//ATPase activity, coupled to transmembrane movement of substances;GO:0008514//organic anion transmembrane transporter activity;GO:0005524//ATP binding	K05668//ABC transporters
10058	136	0	0	0	0	12	0	0	17	0	11	1	ABCB6;ATP-binding cassette, sub-family B (MDR/TAP), member 6	GO:0005739//mitochondrion;GO:0005740//mitochondrial envelope;GO:0031307//integral component of mitochondrial outer membrane;GO:0005783//endoplasmic reticulum;GO:0043190//ATP-binding cassette (ABC) transporter complex;GO:0005741//mitochondrial outer membrane;GO:0005794//Golgi apparatus;GO:0005768//endosome;GO:0005886//plasma membrane;GO:0070062//extracellular vesicular exosome	GO:0006810//transport;GO:0043588//skin development;GO:0055085//transmembrane transport;GO:0007420//brain development;GO:0006779//porphyrin-containing compound biosynthetic process;GO:0015886//heme transport;GO:0006879//cellular iron ion homeostasis;GO:0006200//ATP catabolic process	GO:0020037//heme binding;GO:0005524//ATP binding;GO:0015232//heme transporter activity;GO:0015562//efflux transmembrane transporter activity;GO:0015439//heme-transporting ATPase activity	K05661//ABC transporters
10059	96	0	123	59	183	17	0	40	25	1	21	0	DNM1L;dynamin 1-like	GO:0005874//microtubule;GO:0048471//perinuclear region of cytoplasm;GO:0005739//mitochondrion;GO:0043231//intracellular membrane-bounded organelle;GO:0005829//cytosol;GO:0005777//peroxisome;GO:0005905//coated pit;GO:0043234//protein complex;GO:0005737//cytoplasm;GO:0016020//membrane;GO:0030672//synaptic vesicle membrane;GO:0030054//cell junction;GO:0005741//mitochondrial outer membrane;GO:0005794…	GO:0006184//GTP catabolic process;GO:0061025//membrane fusion;GO:0043653//mitochondrial fragmentation involved in apoptotic process;GO:2001244//positive regulation of intrinsic apoptotic signaling pathway;GO:0032459//regulation of protein oligomerization;GO:0090200//positive regulation of release of cytochrome c from mitochondria;GO:0010821//regulation of mitochondrion organization;GO:0070585//pr…	GO:0003924//GTPase activity;GO:0005525//GTP binding;GO:0008289//lipid binding;GO:0042803//protein homodimerization activity;GO:0042802//identical protein binding;GO:0031625//ubiquitin protein ligase binding;GO:0005515//protein binding	K01528//Endocytosis;Bacterial invasion of epithelial cells;Fc gamma R-mediated phagocytosis;Endocrine and other factor-regulated calcium reabsorption;Synaptic vesicle cycle
1006	0	0	0	0	0	78	24	0	35	0	0	623	CDH8;cadherin 8, type 2	GO:0043679//axon terminus;GO:0043083//synaptic cleft;GO:0005886//plasma membrane;GO:0016021//integral component of membrane	GO:0007155//cell adhesion;GO:0034332//adherens junction organization;GO:0007156//homophilic cell adhesion via plasma membrane adhesion molecules;GO:0034329//cell junction assembly;GO:0045216//cell-cell junction organization;GO:0009409//response to cold;GO:0035249//synaptic transmission, glutamatergic	GO:0005509//calcium ion binding	-
10060	0	0	0	0	6	0	64	1	87	4	18	0	ABCC9;ATP-binding cassette, sub-family C (CFTR/MRP), member 9	GO:0030017//sarcomere;GO:0008076//voltage-gated potassium channel complex;GO:0008282//ATP-sensitive potassium channel complex;GO:0042383//sarcolemma;GO:0005886//plasma membrane	GO:0006813//potassium ion transport;GO:0010107//potassium ion import;GO:0051607//defense response to virus;GO:0007165//signal transduction;GO:0006200//ATP catabolic process;GO:0007268//synaptic transmission;GO:0055085//transmembrane transport	GO:0042626//ATPase activity, coupled to transmembrane movement of substances;GO:0044325//ion channel binding;GO:0015459//potassium channel regulator activity;GO:0005524//ATP binding;GO:0005215//transporter activity;GO:0005267//potassium channel activity;GO:0008281//sulfonylurea receptor activity	K05033//ABC transporters
10061	0	21	0	6	21	31	2	1	28	134	20	0	ABCF2;ATP-binding cassette, sub-family F (GCN20), member 2	GO:0043190//ATP-binding cassette (ABC) transporter complex;GO:0016020//membrane;GO:0005740//mitochondrial envelope	GO:0006810//transport;GO:0006200//ATP catabolic process	GO:0016887//ATPase activity;GO:0005524//ATP binding;GO:0005215//transporter activity	-
100616110	0	0	0	0	0	5	0	0	0	0	0	0	MIR2681;microRNA 2681	-	-	-	-
100616111	0	0	0	0	0	0	0	0	36	0	0	0	MIR4455;microRNA 4455	-	-	-	-
100616117	0	0	0	0	0	0	0	1	0	0	0	0	MIR4653;microRNA 4653	-	-	-	-
100616133	0	0	0	0	0	0	0	0	7	0	0	0	MIR4699;microRNA 4699	-	-	-	-
100616134	0	0	0	0	0	0	0	0	15	0	0	0	MIR499B;microRNA 499b	-	-	-	-
100616138	0	0	0	0	0	0	0	0	1	0	0	0	MIR4787;microRNA 4787	-	-	-	-
100616144	0	0	0	0	0	0	27	0	0	0	0	195	MIR548AN;microRNA 548an	-	-	-	-
100616145	0	0	0	0	0	0	0	0	2	0	0	0	MIR1273G;microRNA 1273g	-	-	-	K01557//Tyrosine metabolism;Metabolic pathways;K06264//ECM-receptor interaction
100616146	0	0	0	0	0	0	0	0	1	0	0	0	MIR4534;microRNA 4534	-	-	-	-
100616168	0	0	0	0	13	0	0	0	0	0	0	0	MIR4754;microRNA 4754	-	-	-	-
100616172	2	0	0	0	0	0	0	0	0	0	0	0	MIR4719;microRNA 4719	-	-	-	-
100616175	1	0	0	0	0	0	0	0	0	0	0	0	MIR4633;microRNA 4633	-	-	-	-
100616176	0	0	0	0	0	0	0	0	0	0	6	0	MIR4708;microRNA 4708	-	-	-	-
100616177	0	0	0	0	0	0	0	0	5	0	0	0	MIR4419A;microRNA 4419a	-	-	-	-
100616182	0	0	0	0	0	40	0	0	0	0	0	0	MIR4500;microRNA 4500	-	-	-	-
100616184	0	0	0	0	0	8	0	0	39	0	0	0	MIR4477A;microRNA 4477a	-	-	-	-
100616187	0	0	0	0	0	0	0	0	14	0	0	0	MIR4783;microRNA 4783	-	-	-	-
100616194	0	0	0	0	0	17	0	0	0	0	0	0	MIR4477B;microRNA 4477b	-	-	-	-
100616203	0	0	0	0	0	0	0	0	1	0	0	0	MIR4734;microRNA 4734	-	-	-	-
100616207	0	0	0	0	0	0	0	0	0	0	3	0	MIR4439;microRNA 4439	-	-	-	-
100616212	0	0	0	0	0	0	20	0	0	0	0	0	MIR3689F;microRNA 3689f	-	-	-	-
100616216	0	0	0	0	0	0	0	0	10	0	0	0	MIR4797;microRNA 4797	-	-	-	-
100616218	0	0	0	0	0	0	0	0	0	1	0	0	MIR3135B;microRNA 3135b	-	-	-	-
100616221	0	0	0	0	0	0	0	0	0	0	2	0	MIR4662A;microRNA 4662a	-	-	-	-
100616227	0	0	0	0	0	0	0	0	6	0	0	0	MIR4502;microRNA 4502	-	-	-	-
100616233	0	0	0	0	0	0	0	0	1	0	0	0	MIR4459;microRNA 4459	-	-	-	-
100616234	0	0	0	0	0	15	0	0	9	0	4	0	MIR4454;microRNA 4454	-	-	-	-
100616238	0	0	0	0	0	0	0	0	16	0	0	0	MIR3529;microRNA 3529	-	-	-	-
100616239	0	0	0	0	0	0	0	0	15	0	0	0	MIR4705;microRNA 4705	-	-	-	-
100616246	0	0	0	5	0	0	0	0	7	0	0	0	MIR4799;microRNA 4799	-	-	-	-
100616247	0	0	0	0	0	0	0	0	8	0	0	0	MIR151B;microRNA 151b	-	-	-	-
100616260	0	0	0	0	0	0	0	0	14	0	0	0	MIR4663;microRNA 4663	-	-	-	-
100616261	0	0	0	0	0	0	0	0	18	0	0	0	MIR4504;microRNA 4504	-	-	-	-
100616267	0	0	0	0	0	0	0	0	19	0	0	0	MIR4776-1;microRNA 4776-1	-	-	-	-
100616268	78	0	0	0	0	0	0	0	0	0	0	0	MIR4472-1;microRNA 4472-1	-	-	-	-
100616271	0	0	0	0	0	0	0	0	9	0	0	0	MIR4637;microRNA 4637	-	-	-	-
100616272	0	0	0	0	0	0	0	0	18	0	0	0	MIR4422;microRNA 4422	-	-	-	-
100616277	0	0	0	0	0	6	0	0	0	0	0	0	MIR4522;microRNA 4522	-	-	-	-
100616281	0	0	0	0	0	0	0	0	5	0	0	0	MIR4788;microRNA 4788	-	-	-	-
100616284	0	0	0	0	0	0	0	0	0	0	13	0	MIR4489;microRNA 4489	-	-	-	-
100616288	0	133	2	46	86	0	6	1039	110	133	269	0	MIR4665;microRNA 4665	-	-	-	-
100616289	0	0	0	0	0	0	17	0	0	0	0	0	MIR4475;microRNA 4475	-	-	-	-
100616295	0	0	0	0	0	0	0	0	4	0	0	0	MIR4764;microRNA 4764	-	-	-	-
100616301	0	0	0	0	14	0	0	0	17	0	0	0	MIR4674;microRNA 4674	-	-	-	-
100616302	0	0	0	0	0	0	0	0	1	0	0	0	MIR548X2;microRNA 548x-2	-	-	-	-
100616306	0	0	0	0	0	0	0	0	15	0	0	0	MIR378H;microRNA 378h	-	-	-	-
100616309	0	0	0	0	0	0	0	0	6	0	0	0	MIR4472-2;microRNA 4472-2	-	-	-	-
100616316	0	0	0	0	0	0	3	0	1	0	0	0	MIR4524A;microRNA 4524a	-	-	-	-
100616328	0	0	0	0	0	14	19	0	0	0	0	0	MIR4424;microRNA 4424	-	-	-	-
100616339	0	0	0	0	0	0	0	43	25	0	0	0	MIR548AE2;microRNA 548ae-2	-	-	-	-
100616343	0	0	0	0	0	4	0	0	0	0	0	0	MIR4677;microRNA 4677	-	-	-	-
100616345	0	0	0	0	9	0	0	0	18	0	0	0	MIR4426;microRNA 4426	-	-	-	K02927//Ribosome
100616349	0	0	0	0	0	0	0	0	11	0	0	0	MIR4451;microRNA 4451	-	-	-	-
100616353	0	0	0	0	0	0	0	0	7	0	0	0	MIR4532;microRNA 4532	-	-	-	-
100616362	0	0	0	0	0	0	2	0	0	0	0	0	MIR4533;microRNA 4533	-	-	-	-
100616364	1	0	0	0	0	0	0	0	0	0	0	0	MIR4785;microRNA 4785	-	-	-	-
100616367	0	0	0	0	0	0	0	0	0	0	8	0	MIR4467;microRNA 4467	-	-	-	-
100616371	0	0	1	0	0	0	0	1	8	0	0	0	MIR4746;microRNA 4746	-	-	-	-
100616375	0	0	0	0	0	0	0	0	17	0	0	0	MIR4438;microRNA 4438	-	-	-	-
100616378	0	0	0	0	0	0	0	0	7	0	0	0	MIR4784;microRNA 4784	-	-	-	-
100616383	0	0	0	0	0	0	0	0	13	0	0	0	MIR4675;microRNA 4675	-	-	-	-
100616386	0	0	0	0	0	0	0	0	0	0	7	0	MIR4654;microRNA 4654	-	-	-	-
100616404	0	0	0	0	7	0	0	0	0	0	0	0	MIR4515;microRNA 4515	-	-	-	-
100616410	0	0	0	0	0	0	0	54	0	0	0	0	MIR4692;microRNA 4692	-	-	-	-
100616414	0	0	0	0	0	6	0	0	0	0	0	0	MIR4761;microRNA 4761	-	-	-	-
100616415	0	0	0	0	0	0	0	0	10	0	0	0	MIR4535;microRNA 4535	-	-	-	-
100616417	0	0	0	0	0	0	9	0	0	0	0	0	MIR4786;microRNA 4786	-	-	-	-
100616425	13	0	0	0	0	0	0	0	0	0	0	0	MIR4748;microRNA 4748	-	-	-	-
100616426	0	0	0	0	0	7	0	0	0	0	0	0	MIR4694;microRNA 4694	-	-	-	-
100616427	0	0	0	0	0	0	0	0	6	0	0	0	MIR5096;microRNA 5096	-	-	-	-
100616429	0	0	0	0	0	0	0	0	0	107	0	0	MIR4672;microRNA 4672	-	-	-	-
100616435	0	0	0	0	0	0	0	0	2	0	0	0	MIR4801;microRNA 4801	-	-	-	-
100616436	0	0	0	0	0	0	0	0	0	0	1	0	MIR4449;microRNA 4449	-	-	-	-
100616440	0	0	0	0	0	0	0	47	10	0	0	0	MIR548AG2;microRNA 548ag-2	-	-	-	-
100616454	0	0	0	0	0	0	0	0	4	0	0	0	MIR4497;microRNA 4497	-	-	-	-
100616458	0	21	0	0	2	0	0	6	0	0	0	3	MIR5095;microRNA 5095	-	-	-	-
100616465	0	0	0	0	0	0	0	45	8	0	0	0	MIR4656;microRNA 4656	-	-	-	-
100616469	0	0	0	11	0	0	0	0	0	0	0	0	MIR4429;microRNA 4429	-	-	-	-
100616480	0	0	0	0	0	0	0	0	18	0	0	0	MIR4479;microRNA 4479	-	-	-	-
100616485	0	0	0	0	0	0	0	0	11	0	0	0	MIR4447;microRNA 4447	-	-	-	-
100616486	0	0	0	0	0	0	11	0	0	0	0	0	MIR4698;microRNA 4698	-	-	-	-
100616488	0	0	0	0	0	0	0	0	0	1	0	0	MIR548AK;microRNA 548ak	-	-	-	-
100616492	0	0	0	0	0	0	0	0	0	0	11	0	MIR378F;microRNA 378f	-	-	-	-
100616494	0	0	0	0	0	15	0	0	8	0	0	0	MIR1269B;microRNA 1269b	-	-	-	-
100616499	0	0	0	0	0	0	0	0	0	0	2	0	MIR4435-1;microRNA 4435-1	-	-	-	-
100616668	0	162	80	92	155	25	32	258	91	0	250	0	TPTE2P5;transmembrane phosphoinositide 3-phosphatase and tensin homolog 2 pseudogene 5	-	-	-	-
10062	1	1	0	25	9	26	0	0	30	0	12	0	NR1H3;nuclear receptor subfamily 1, group H, member 3	GO:0005654//nucleoplasm;GO:0000790//nuclear chromatin;GO:0005634//nucleus	GO:0032570//response to progesterone;GO:2000188//regulation of cholesterol homeostasis;GO:0043031//negative regulation of macrophage activation;GO:0010875//positive regulation of cholesterol efflux;GO:0045944//positive regulation of transcription from RNA polymerase II promoter;GO:0010870//positive regulation of receptor biosynthetic process;GO:0032369//negative regulation of lipid transport;GO:0…	GO:0003713//transcription coactivator activity;GO:0000978//RNA polymerase II core promoter proximal region sequence-specific DNA binding;GO:0003677//DNA binding;GO:0015485//cholesterol binding;GO:0044212//transcription regulatory region DNA binding;GO:0001077//RNA polymerase II core promoter proximal region sequence-specific DNA binding transcription factor activity involved in positive regulatio…	K08536//Hepatitis C;PPAR signaling pathway
100631378	0	44	27	14	15	0	0	0	0	0	33	0	LOC100631378;uncharacterized 100631378	-	-	-	-
100652740	0	37	0	6	71	0	0	467	3	0	132	0	PYCARDOS;PYCARD opposite strand	-	-	-	K12799//Pertussis;Legionellosis;Influenza A;NOD-like receptor signaling pathway;Cytosolic DNA-sensing pathway;Salmonella infection
100652748	1	0	0	0	27	27	0	0	0	0	0	0	TIMM23B;translocase of inner mitochondrial membrane 23 homolog B (yeast)	GO:0005744//mitochondrial inner membrane presequence translocase complex;GO:0016021//integral component of membrane	GO:0071806//protein transmembrane transport;GO:0006886//intracellular protein transport	GO:0015450//P-P-bond-hydrolysis-driven protein transmembrane transporter activity	K00939//Purine metabolism;Biosynthesis of secondary metabolites;Pyrimidine metabolism;Metabolic pathways;K00797//Metabolic pathways;beta-Alanine metabolism;Ribosome;Cysteine and methionine metabolism;Glutathione metabolism;Arginine and proline metabolism;K11447//Transcriptional misregulation in cancer
100652759	0	50	26	72	69	9	22	29	13	0	102	0	PRICKLE2-AS1;PRICKLE2 antisense RNA 1	-	-	-	K04511//Wnt signaling pathway
100652768	0	96	99	121	84	0	27	1	51	0	171	0	LOC100652768;uncharacterized LOC100652768	-	-	-	-
100652772	0	20	0	8	45	6	0	0	6	0	0	0	NNT-AS1;NNT antisense RNA 1	-	-	-	K00939//Purine metabolism;Pyrimidine metabolism;Biosynthesis of secondary metabolites;Metabolic pathways;K11447//Transcriptional misregulation in cancer
100652781	0	0	0	0	0	0	0	64	8	3	0	0	SNX29P1;sorting nexin 29 pseudogene 1	-	-	-	K15348//Salmonella infection
100652824	163	0	0	0	0	28	0	0	14	0	0	0	LOC100652824;uncharacterized protein KIAA2012	-	-	-	-
100652846	0	0	0	7	0	4	0	44	0	0	0	0	CACNA1C-AS1;CACNA1C antisense RNA 1	-	-	-	K04850//Long-term potentiation;Serotonergic synapse;Arrhythmogenic right ventricular cardiomyopathy (ARVC);Dopaminergic synapse;GnRH signaling pathway;Type II diabetes mellitus;Vascular smooth muscle contraction;MAPK signaling pathway;Glutamatergic synapse;Amphetamine addiction;Cardiac muscle contraction;Dilated cardiomyopathy;Retrograde endocannabinoid signaling;Calcium signaling pathway;Choline…
100652883	0	0	0	0	0	1	0	0	13	0	0	0	ALOX15P1;arachidonate 15-lipoxygenase pseudogene 1	-	-	-	K00460//Arachidonic acid metabolism;Linoleic acid metabolism;Metabolic pathways;Serotonergic synapse
100653515	0	0	0	0	0	50	0	0	9	0	0	0	LOC100653515;differential display clone 8	-	-	-	-
10066	0	0	0	0	8	13	10	0	13	0	14	0	SCAMP2;secretory carrier membrane protein 2	GO:0005634//nucleus;GO:0043231//intracellular membrane-bounded organelle;GO:0032588//trans-Golgi network membrane;GO:0005730//nucleolus;GO:0055038//recycling endosome membrane;GO:0030133//transport vesicle;GO:0016021//integral component of membrane;GO:0005794//Golgi apparatus;GO:0070062//extracellular vesicular exosome	GO:0006892//post-Golgi vesicle-mediated transport;GO:0015031//protein transport	GO:0005515//protein binding	K08823//Legionellosis
10067	0	0	0	0	0	11	35	54	0	0	9	0	SCAMP3;secretory carrier membrane protein 3	GO:0000139//Golgi membrane;GO:0016021//integral component of membrane;GO:0070062//extracellular vesicular exosome	GO:0032526//response to retinoic acid;GO:0006892//post-Golgi vesicle-mediated transport;GO:0015031//protein transport	GO:0031625//ubiquitin protein ligase binding	K08823//Legionellosis
10068	0	109	88	37	148	0	0	30	44	78	111	1	IL18BP;interleukin 18 binding protein	GO:0005576//extracellular region;GO:0070062//extracellular vesicular exosome;GO:0005615//extracellular space	GO:1900116//extracellular negative regulation of signal transduction;GO:0042088//T-helper 1 type immune response;GO:0070301//cellular response to hydrogen peroxide;GO:0032496//response to lipopolysaccharide;GO:0071356//cellular response to tumor necrosis factor	GO:0048019//receptor antagonist activity;GO:0042007//interleukin-18 binding	-
10069	106	0	0	13	126	0	0	0	25	0	0	0	RWDD2B;RWD domain containing 2B	-	-	-	-
1007	0	0	0	0	0	0	0	0	59	0	0	0	CDH9;cadherin 9, type 2 (T1-cadherin)	GO:0005886//plasma membrane;GO:0016021//integral component of membrane	GO:0034332//adherens junction organization;GO:0045216//cell-cell junction organization;GO:0007156//homophilic cell adhesion via plasma membrane adhesion molecules;GO:0034329//cell junction assembly;GO:0016337//single organismal cell-cell adhesion	GO:0005509//calcium ion binding	-
10071	7	0	0	0	0	45	32	165	134	11	25	0	MUC12;mucin 12, cell surface associated	GO:0005796//Golgi lumen;GO:0005887//integral component of plasma membrane	GO:0001558//regulation of cell growth;GO:0043687//post-translational protein modification;GO:0016266//O-glycan processing;GO:0044267//cellular protein metabolic process	-	-
10072	2	92	35	24	57	0	29	162	41	0	1	0	DPP3;dipeptidyl-peptidase 3	GO:0070062//extracellular vesicular exosome;GO:0005730//nucleolus;GO:0005886//plasma membrane;GO:0005737//cytoplasm;GO:0005634//nucleus	GO:0006508//proteolysis	GO:0008237//metallopeptidase activity;GO:0008270//zinc ion binding;GO:0005515//protein binding;GO:0008239//dipeptidyl-peptidase activity	-
10073	0	1	0	0	11	6	0	0	0	0	4	0	SNUPN;snurportin 1	GO:0070062//extracellular vesicular exosome;GO:0005829//cytosol;GO:0005643//nuclear pore	GO:0006606//protein import into nucleus;GO:0000387//spliceosomal snRNP assembly;GO:0034660//ncRNA metabolic process;GO:0061015//snRNA import into nucleus;GO:0016070//RNA metabolic process;GO:0010467//gene expression	GO:0008565//protein transporter activity;GO:0000339//RNA cap binding	K13151//RNA transport
10075	42	208	0	122	438	35	89	85	127	143	4	284	HUWE1;HECT, UBA and WWE domain containing 1, E3 ubiquitin protein ligase	GO:0005634//nucleus;GO:0005737//cytoplasm;GO:0016020//membrane;GO:0070062//extracellular vesicular exosome;GO:0005730//nucleolus	GO:0016574//histone ubiquitination;GO:0006284//base-excision repair;GO:0000209//protein polyubiquitination;GO:0042787//protein ubiquitination involved in ubiquitin-dependent protein catabolic process;GO:0030154//cell differentiation;GO:0006513//protein monoubiquitination	GO:0005515//protein binding;GO:0044822//poly(A) RNA binding;GO:0016874//ligase activity;GO:0004842//ubiquitin-protein transferase activity;GO:0003677//DNA binding	K10592//Ubiquitin mediated proteolysis
100750225	0	0	0	0	9	0	0	0	0	0	0	0	PCAT1;prostate cancer associated transcript 1 (non-protein coding)	-	-	-	K11433//Lysine degradation
10076	0	0	0	0	0	50	0	0	35	0	0	0	PTPRU;protein tyrosine phosphatase, receptor type, U	GO:0005886//plasma membrane;GO:0005887//integral component of plasma membrane;GO:0005911//cell-cell junction	GO:0030336//negative regulation of cell migration;GO:0007155//cell adhesion;GO:0016337//single organismal cell-cell adhesion;GO:0008285//negative regulation of cell proliferation;GO:0034394//protein localization to cell surface;GO:0035335//peptidyl-tyrosine dephosphorylation;GO:0060070//canonical Wnt signaling pathway;GO:0006470//protein dephosphorylation;GO:0007185//transmembrane receptor protei…	GO:0005515//protein binding;GO:0004725//protein tyrosine phosphatase activity;GO:0005001//transmembrane receptor protein tyrosine phosphatase activity;GO:0008013//beta-catenin binding	-
10077	0	0	0	0	0	0	0	0	30	0	0	0	TSPAN32;tetraspanin 32	GO:0009986//cell surface;GO:0070442//integrin alphaIIb-beta3 complex;GO:0005622//intracellular	GO:0007010//cytoskeleton organization;GO:0008285//negative regulation of cell proliferation;GO:0070527//platelet aggregation;GO:0030886//negative regulation of myeloid dendritic cell activation;GO:0050688//regulation of defense response to virus;GO:0007229//integrin-mediated signaling pathway;GO:0042832//defense response to protozoan;GO:0007267//cell-cell signaling	-	K06508//B cell receptor signaling pathway;Hepatitis C;Malaria
10079	0	0	1	0	55	24	1	10	21	0	6	413	ATP9A;ATPase, class II, type 9A	GO:0055037//recycling endosome;GO:0005802//trans-Golgi network;GO:0048471//perinuclear region of cytoplasm;GO:0031901//early endosome membrane;GO:0016021//integral component of membrane;GO:0005769//early endosome	GO:0045332//phospholipid translocation;GO:0008152//metabolic process	GO:0019829//cation-transporting ATPase activity;GO:0004012//phospholipid-translocating ATPase activity;GO:0000287//magnesium ion binding;GO:0005524//ATP binding	K01530//Purine metabolism
1008	0	0	0	0	0	0	13	0	44	0	1	0	CDH10;cadherin 10, type 2 (T2-cadherin)	GO:0005886//plasma membrane;GO:0016021//integral component of membrane	GO:0034332//adherens junction organization;GO:0016337//single organismal cell-cell adhesion;GO:0034329//cell junction assembly;GO:0007156//homophilic cell adhesion via plasma membrane adhesion molecules;GO:0045216//cell-cell junction organization	GO:0005509//calcium ion binding	-
10081	38	0	1	0	0	0	0	0	10	0	0	0	PDCD7;programmed cell death 7	GO:0005689//U12-type spliceosomal complex	GO:0006915//apoptotic process;GO:0070234//positive regulation of T cell apoptotic process;GO:2001235//positive regulation of apoptotic signaling pathway;GO:0008380//RNA splicing;GO:0051384//response to glucocorticoid	-	K11447//Transcriptional misregulation in cancer;K00797//Metabolic pathways;beta-Alanine metabolism;Glutathione metabolism;Arginine and proline metabolism;Ribosome;Cysteine and methionine metabolism
10082	0	0	1	11	36	5	0	0	9	0	39	0	GPC6;glypican 6	GO:0005887//integral component of plasma membrane;GO:0005634//nucleus;GO:0005615//extracellular space;GO:0005796//Golgi lumen;GO:0005578//proteinaceous extracellular matrix;GO:0031225//anchored component of membrane;GO:0043202//lysosomal lumen;GO:0005886//plasma membrane	GO:0006027//glycosaminoglycan catabolic process;GO:0030204//chondroitin sulfate metabolic process;GO:0007603//phototransduction, visible light;GO:0044281//small molecule metabolic process;GO:0030203//glycosaminoglycan metabolic process;GO:0006024//glycosaminoglycan biosynthetic process;GO:0016477//cell migration;GO:0001523//retinoid metabolic process;GO:0005975//carbohydrate metabolic process	GO:0043395//heparan sulfate proteoglycan binding	-
10083	0	0	0	0	0	29	0	0	7	309	0	0	USH1C;Usher syndrome 1C (autosomal recessive, severe)	GO:0005737//cytoplasm;GO:0005856//cytoskeleton;GO:0001917//photoreceptor inner segment;GO:0001750//photoreceptor outer segment;GO:0045177//apical part of cell;GO:0005886//plasma membrane;GO:0045202//synapse;GO:0032420//stereocilium;GO:0005829//cytosol	GO:0042472//inner ear morphogenesis;GO:0007605//sensory perception of sound;GO:0050957//equilibrioception;GO:0042491//auditory receptor cell differentiation;GO:0030046//parallel actin filament bundle assembly;GO:0045494//photoreceptor cell maintenance;GO:0000086//G2/M transition of mitotic cell cycle;GO:0050953//sensory perception of light stimulus	GO:0005515//protein binding;GO:0030507//spectrin binding	K06095//Tight junction
10084	0	0	0	0	29	0	0	0	27	0	0	0	PQBP1;polyglutamine binding protein 1	GO:0016607//nuclear speck;GO:0005730//nucleolus;GO:0071598//neuronal ribonucleoprotein granule;GO:0010494//cytoplasmic stress granule;GO:0005634//nucleus;GO:0005737//cytoplasm	GO:0000380//alternative mRNA splicing, via spliceosome;GO:0048814//regulation of dendrite morphogenesis;GO:0043484//regulation of RNA splicing;GO:0006351//transcription, DNA-templated;GO:0006355//regulation of transcription, DNA-templated;GO:0031175//neuron projection development	GO:0003713//transcription coactivator activity;GO:0043021//ribonucleoprotein complex binding;GO:0003677//DNA binding	K12865//Spliceosome
100847000	0	0	0	0	0	0	0	0	5	0	3	0	MIR5579;microRNA 5579	-	-	-	-
100847004	0	0	0	0	0	0	0	3	0	0	0	0	MIR5188;microRNA 5188	-	-	-	-
100847007	0	0	0	0	0	0	0	0	1	0	0	0	MIR5696;microRNA 5696	-	-	-	-
100847008	0	0	0	0	0	0	0	0	0	0	7	0	MIR4524B;microRNA 4524b	-	-	-	-
100847026	0	0	0	0	0	0	0	0	1	0	0	0	MIR5006;microRNA 5006	-	-	-	-
100847029	49	0	0	0	0	0	0	0	0	0	0	0	MIR5003;microRNA 5003	-	-	-	-
100847030	0	0	0	0	0	13	0	0	0	0	0	0	MIR548AT;microRNA 548at	-	-	-	-
100847031	0	0	0	0	0	0	0	0	9	0	0	0	MIR5700;microRNA 5700	-	-	-	-
100847036	0	0	0	0	0	1	0	0	0	0	0	0	MIR5186;microRNA 5186	-	-	-	-
100847043	78	0	0	0	0	0	0	0	0	0	0	0	MIR5682;microRNA 5682	-	-	-	-
100847044	0	0	0	0	0	0	0	0	26	0	0	0	MIR5087;microRNA 5087	-	-	-	-
100847051	49	0	0	0	0	0	0	0	0	0	2	0	MIR5194;microRNA 5194	-	-	-	-
100847053	0	0	0	0	0	0	0	0	19	0	0	0	MIR5702;microRNA 5702	-	-	-	-
100847055	0	0	18	0	0	0	2	0	0	282	0	0	MIR5697;microRNA 5697	-	-	-	-
100847057	0	0	0	0	0	0	0	0	1	0	0	0	MIR5189;microRNA 5189	-	-	-	-
100847064	0	0	0	0	0	0	0	0	19	0	0	0	MIR5694;microRNA 5694	-	-	-	-
100847066	0	0	0	0	0	0	0	0	14	0	0	0	MIR5692A1;microRNA 5692a-1	-	-	-	-
100847084	0	0	0	0	0	8	0	0	0	0	0	0	MIR548AP;microRNA 548ap	-	-	-	-
100847092	0	0	0	0	0	0	0	0	0	0	18	0	MIR548AS;microRNA 548as	-	-	-	-
10085	0	0	0	0	0	13	23	0	11	0	1	0	EDIL3;EGF-like repeats and discoidin I-like domains 3	GO:0070062//extracellular vesicular exosome;GO:0031982//vesicle	GO:0007275//multicellular organismal development;GO:0010811//positive regulation of cell-substrate adhesion;GO:0007155//cell adhesion	GO:0005509//calcium ion binding;GO:0005178//integrin binding	K03902//Complement and coagulation cascades
10086	0	0	0	0	0	0	0	77	0	0	1	0	HHLA1;HERV-H LTR-associating 1	GO:0005576//extracellular region	-	-	K04928//Cholinergic synapse
100861532	3205	365	119	47	144	725	479	1990	1309	5523	275	16702	RNA45S5;RNA, 45S pre-ribosomal 5	-	-	-	K05692//Focal adhesion;Vibrio cholerae infection;Gastric acid secretion;Pathogenic Escherichia coli infection;Regulation of actin cytoskeleton;Hypertrophic cardiomyopathy (HCM);Shigellosis;Leukocyte transendothelial migration;Dilated cardiomyopathy;Bacterial invasion of epithelial cells;Tight junction;Phototransduction - fly;Adherens junction;Viral myocarditis;Influenza A;Salmonella infection;Pha…
100861541	0	0	0	0	0	13	0	0	51	0	0	0	DOCK9-AS2;DOCK9 antisense RNA 2 (head to head)	-	-	-	-
100861548	86	1132	1279	1523	1550	1	205	2489	909	1	2420	486	PINK1-AS;PINK1 antisense RNA	-	-	-	K05688//Parkinson's disease
100862671	0	0	0	0	0	39	0	0	0	1	0	1	LOC100862671;uncharacterized LOC100862671	-	-	-	K00871//Insulin signaling pathway;Calcium signaling pathway
100862728	0	0	19	0	6	0	0	0	10	0	9	0	UPK1A-AS1;UPK1A antisense RNA 1	-	-	-	-
10087	71	29	1	35	65	11	0	0	0	0	12	0	COL4A3BP;collagen, type IV, alpha 3 (Goodpasture antigen) binding protein	GO:0005634//nucleus;GO:0048471//perinuclear region of cytoplasm;GO:0005789//endoplasmic reticulum membrane;GO:0005794//Golgi apparatus;GO:0005730//nucleolus;GO:0005829//cytosol;GO:0005739//mitochondrion	GO:0035621//ER to Golgi ceramide transport;GO:0003007//heart morphogenesis;GO:0007165//signal transduction;GO:0034976//response to endoplasmic reticulum stress;GO:0006936//muscle contraction;GO:0006468//protein phosphorylation;GO:0006665//sphingolipid metabolic process;GO:0007029//endoplasmic reticulum organization;GO:0000902//cell morphogenesis;GO:0006672//ceramide metabolic process;GO:0030148//…	GO:0004672//protein kinase activity;GO:0005515//protein binding;GO:0070273//phosphatidylinositol-4-phosphate binding;GO:0097001//ceramide binding;GO:0035620//ceramide transporter activity	-
100873740	0	0	0	0	0	0	24	0	0	0	0	0	RNU6-31P;RNA, U6 small nuclear 31, pseudogene	-	-	-	-
100873754	0	0	0	0	0	0	9	0	11	0	0	0	RNU6-19P;RNA, U6 small nuclear 19, pseudogene	-	-	-	-
100873756	0	0	0	0	2	0	0	0	25	0	0	0	RNU6-28P;RNA, U6 small nuclear 28, pseudogene	-	-	-	-
100873765	0	0	0	0	0	0	0	0	1	0	0	0	RNU6-57P;RNA, U6 small nuclear 57, pseudogene	-	-	-	-
100873770	88	0	0	0	0	0	0	0	0	0	0	0	RNU6-66P;RNA, U6 small nuclear 66, pseudogene	-	-	-	-
100873773	0	0	0	0	0	0	0	0	11	0	0	0	RNU6-69P;RNA, U6 small nuclear 69, pseudogene	-	-	-	-
100873774	0	0	0	0	0	0	0	0	1	0	0	0	RNU6-71P;RNA, U6 small nuclear 71, pseudogene	-	-	-	-
100873780	64	0	0	0	0	0	0	0	12	0	0	0	RNU6-81P;RNA, U6 small nuclear 81, pseudogene	-	-	-	-
100873782	0	10	0	0	0	0	0	0	0	0	4	0	RNU6-83P;RNA, U6 small nuclear 83, pseudogene	-	-	-	-
100873924	0	0	0	0	0	0	0	0	0	0	11	0	HLX-AS1;HLX antisense RNA 1	-	-	-	-
100873935	1	317	0	177	210	0	0	0	23	0	360	312	MTOR-AS1;MTOR antisense RNA 1	-	-	-	K07203//ErbB signaling pathway;Glioma;Type II diabetes mellitus;Adipocytokine signaling pathway;mTOR signaling pathway;Prostate cancer;Pathways in cancer;Meiosis - yeast;Insulin signaling pathway;Acute myeloid leukemia
100873954	0	167	257	235	354	22	48	72	51	104	563	522	SNRK-AS1;SNRK antisense RNA 1	-	-	-	-
100873969	18	0	0	0	0	0	0	0	0	0	0	0	GPC5-AS1;GPC5 antisense RNA 1	-	-	-	-
100873985	0	0	0	6	11	0	0	78	0	0	5	0	MED14OS;MED14 opposite strand	-	-	-	-
100873989	100	0	0	0	0	28	3	0	30	0	0	0	GRM5-AS1;GRM5 antisense RNA 1	-	-	-	K04604//Glutamatergic synapse;Calcium signaling pathway;Retrograde endocannabinoid signaling;Long-term potentiation;Neuroactive ligand-receptor interaction;Gap junction;Huntington's disease;Long-term depression
100874014	0	40	0	0	16	0	0	0	18	0	0	0	NAV2-AS2;NAV2 antisense RNA 2	-	-	-	-
100874092	0	0	0	0	0	0	0	0	4	0	0	0	UBE2E1-AS1;UBE2E1 antisense RNA 1	-	-	-	-
100874095	0	0	0	0	0	0	0	110	14	0	24	0	ADIPOQ-AS1;ADIPOQ antisense RNA 1	-	-	-	K07296//Adipocytokine signaling pathway;PPAR signaling pathway;Type II diabetes mellitus
100874122	0	0	0	5	26	0	0	0	7	0	53	0	FRMPD3-AS1;FRMPD3 antisense RNA 1	-	-	-	-
100874214	0	0	0	0	0	0	0	71	8	0	0	0	TM4SF19-AS1;TM4SF19 antisense RNA 1	-	-	-	K11447//Transcriptional misregulation in cancer;K00797//Cysteine and methionine metabolism;Ribosome;Arginine and proline metabolism;Glutathione metabolism;Metabolic pathways;beta-Alanine metabolism;K00939//Metabolic pathways;Biosynthesis of secondary metabolites;Pyrimidine metabolism;Purine metabolism
100874236	140	0	0	0	0	0	0	0	0	0	0	0	COL18A1-AS2;COL18A1 antisense RNA 2	-	-	-	-
100874259	0	32	0	14	21	16	28	1	43	0	63	0	SLC25A30-AS1;SLC25A30 antisense RNA 1	-	-	-	-
100874261	0	0	0	3	0	0	0	0	0	0	0	0	LINC00854;long intergenic non-protein coding RNA 854	-	-	-	-
100874392	12	0	0	1	0	7	79	0	38	0	0	0	ANKRD20A12P;ankyrin repeat domain 20 family, member A12, pseudogene	-	-	-	-
100874433	0	0	0	0	0	0	0	0	0	0	5	0	IQCJ-SCHIP1-AS1;IQCJ-SCHIP1 readthrough antisense RNA 1	-	-	-	-
100885776	43	0	0	7	0	0	19	0	23	149	0	0	UGDH-AS1;UGDH antisense RNA 1	-	-	-	K06467//B cell receptor signaling pathway;Cell adhesion molecules (CAMs);Hematopoietic cell lineage;K06478//T cell receptor signaling pathway;Primary immunodeficiency;Cell adhesion molecules (CAMs);Fc gamma R-mediated phagocytosis
100885778	0	0	0	23	0	0	11	0	49	0	1	0	NALCN-AS1;NALCN antisense RNA 1	-	-	-	-
100887750	0	0	0	0	0	0	0	0	9	0	0	0	MRPS31P5;mitochondrial ribosomal protein S31 pseudogene 5	-	-	-	K12795//NOD-like receptor signaling pathway;Plant-pathogen interaction;K00939//Metabolic pathways;Pyrimidine metabolism;Biosynthesis of secondary metabolites;Purine metabolism
10089	0	0	0	0	0	16	0	45	20	0	0	0	KCNK7;potassium channel, subfamily K, member 7	GO:0005886//plasma membrane;GO:0016021//integral component of membrane	GO:0006813//potassium ion transport;GO:0034765//regulation of ion transmembrane transport;GO:0007268//synaptic transmission;GO:0071805//potassium ion transmembrane transport	GO:0005267//potassium channel activity;GO:0005244//voltage-gated ion channel activity	-
1009	0	0	0	0	19	25	38	0	39	130	0	0	CDH11;cadherin 11, type 2, OB-cadherin (osteoblast)	GO:0070062//extracellular vesicular exosome;GO:0005886//plasma membrane;GO:0016021//integral component of membrane;GO:0005737//cytoplasm	GO:0045216//cell-cell junction organization;GO:0007156//homophilic cell adhesion via plasma membrane adhesion molecules;GO:0034332//adherens junction organization;GO:0001503//ossification;GO:0021957//corticospinal tract morphogenesis;GO:0034329//cell junction assembly;GO:0007155//cell adhesion;GO:0001501//skeletal system development	GO:0005509//calcium ion binding	-
10090	0	0	0	0	9	10	63	0	80	0	16	0	UST;uronyl-2-sulfotransferase	GO:0000139//Golgi membrane;GO:0016021//integral component of membrane	GO:0005975//carbohydrate metabolic process;GO:0006477//protein sulfation;GO:0044281//small molecule metabolic process;GO:0030203//glycosaminoglycan metabolic process;GO:0030208//dermatan sulfate biosynthetic process;GO:0030204//chondroitin sulfate metabolic process	GO:0008146//sulfotransferase activity	K03193//Glycosaminoglycan biosynthesis - chondroitin sulfate
10092	0	0	0	36	102	0	0	0	11	0	0	107	ARPC5;actin related protein 2/3 complex, subunit 5, 16kDa	GO:0005737//cytoplasm;GO:0042995//cell projection;GO:0070062//extracellular vesicular exosome;GO:0005925//focal adhesion;GO:0005885//Arp2/3 protein complex;GO:0005829//cytosol;GO:0015629//actin cytoskeleton	GO:0006928//cellular component movement;GO:0034314//Arp2/3 complex-mediated actin nucleation;GO:0038096//Fc-gamma receptor signaling pathway involved in phagocytosis;GO:0030036//actin cytoskeleton organization;GO:0045087//innate immune response	GO:0005200//structural constituent of cytoskeleton;GO:0051015//actin filament binding;GO:0005515//protein binding	K05754//Regulation of actin cytoskeleton;Salmonella infection;Bacterial invasion of epithelial cells;Pathogenic Escherichia coli infection;Fc gamma R-mediated phagocytosis;Shigellosis
10093	0	206	35	56	56	13	18	367	23	1	99	0	ARPC4;actin related protein 2/3 complex, subunit 4, 20kDa	GO:0042995//cell projection;GO:0005829//cytosol;GO:0005885//Arp2/3 protein complex;GO:0070062//extracellular vesicular exosome	GO:0038096//Fc-gamma receptor signaling pathway involved in phagocytosis;GO:0034314//Arp2/3 complex-mediated actin nucleation;GO:0045010//actin nucleation;GO:0045087//innate immune response;GO:0030041//actin filament polymerization	GO:0019899//enzyme binding;GO:0005200//structural constituent of cytoskeleton;GO:0030674//protein binding, bridging;GO:0005515//protein binding;GO:0051015//actin filament binding	K05755//Shigellosis;Fc gamma R-mediated phagocytosis;Pathogenic Escherichia coli infection;Bacterial invasion of epithelial cells;Salmonella infection;Regulation of actin cytoskeleton
10094	0	61	0	74	54	0	12	0	8	0	0	0	ARPC3;actin related protein 2/3 complex, subunit 3, 21kDa	GO:0030027//lamellipodium;GO:0015629//actin cytoskeleton;GO:0005829//cytosol;GO:0016020//membrane;GO:0005885//Arp2/3 protein complex;GO:0005925//focal adhesion;GO:0070062//extracellular vesicular exosome	GO:0034314//Arp2/3 complex-mediated actin nucleation;GO:0006928//cellular component movement;GO:0038096//Fc-gamma receptor signaling pathway involved in phagocytosis;GO:0045087//innate immune response	GO:0005200//structural constituent of cytoskeleton;GO:0005515//protein binding;GO:0051015//actin filament binding	K05756//Regulation of actin cytoskeleton;Salmonella infection;Bacterial invasion of epithelial cells;Shigellosis;Pathogenic Escherichia coli infection;Fc gamma R-mediated phagocytosis
10095	0	50	31	4	16	0	23	20	22	0	0	0	ARPC1B;actin related protein 2/3 complex, subunit 1B, 41kDa	GO:0015629//actin cytoskeleton;GO:0005885//Arp2/3 protein complex;GO:0005925//focal adhesion;GO:0070062//extracellular vesicular exosome;GO:0005737//cytoplasm	GO:0034314//Arp2/3 complex-mediated actin nucleation;GO:0006928//cellular component movement	GO:0005200//structural constituent of cytoskeleton;GO:0051015//actin filament binding	K05757//Fc gamma R-mediated phagocytosis;Pathogenic Escherichia coli infection;Shigellosis;Salmonella infection;Bacterial invasion of epithelial cells;Regulation of actin cytoskeleton
10096	0	0	2	56	209	13	0	3	23	0	3	0	ACTR3;ARP3 actin-related protein 3 homolog (yeast)	GO:0005911//cell-cell junction;GO:0030027//lamellipodium;GO:0070062//extracellular vesicular exosome;GO:0000139//Golgi membrane;GO:0016020//membrane;GO:0005885//Arp2/3 protein complex;GO:0002102//podosome;GO:0005925//focal adhesion;GO:0060076//excitatory synapse;GO:0005829//cytosol;GO:0015629//actin cytoskeleton;GO:0030056//hemidesmosome	GO:0034314//Arp2/3 complex-mediated actin nucleation;GO:0051653//spindle localization;GO:0016344//meiotic chromosome movement towards spindle pole;GO:0007163//establishment or maintenance of cell polarity;GO:0008356//asymmetric cell division;GO:0046677//response to antibiotic;GO:0038096//Fc-gamma receptor signaling pathway involved in phagocytosis;GO:0033206//meiotic cytokinesis;GO:0043519//regul…	GO:0005515//protein binding;GO:0051015//actin filament binding;GO:0005524//ATP binding;GO:0005200//structural constituent of cytoskeleton	K05692//Dilated cardiomyopathy;Leukocyte transendothelial migration;Shigellosis;Tight junction;Bacterial invasion of epithelial cells;Gastric acid secretion;Pathogenic Escherichia coli infection;Focal adhesion;Vibrio cholerae infection;Hypertrophic cardiomyopathy (HCM);Regulation of actin cytoskeleton;Influenza A;Arrhythmogenic right ventricular cardiomyopathy (ARVC);Salmonella infection;Phagosom…
10097	0	67	2	199	354	7	18	0	9	0	0	0	ACTR2;ARP2 actin-related protein 2 homolog (yeast)	GO:0016020//membrane;GO:0030478//actin cap;GO:0005885//Arp2/3 protein complex;GO:0070062//extracellular vesicular exosome;GO:0005737//cytoplasm;GO:0015629//actin cytoskeleton;GO:0005829//cytosol;GO:0005925//focal adhesion;GO:0042995//cell projection	GO:0038096//Fc-gamma receptor signaling pathway involved in phagocytosis;GO:0033206//meiotic cytokinesis;GO:0045087//innate immune response;GO:0016482//cytoplasmic transport;GO:0006928//cellular component movement;GO:0034314//Arp2/3 complex-mediated actin nucleation;GO:0051653//spindle localization;GO:0042384//cilium assembly;GO:0016344//meiotic chromosome movement towards spindle pole;GO:0007163…	GO:0005524//ATP binding;GO:0005200//structural constituent of cytoskeleton;GO:0051015//actin filament binding	K05692//Phototransduction - fly;Adherens junction;Viral myocarditis;Influenza A;Salmonella infection;Phagosome;Arrhythmogenic right ventricular cardiomyopathy (ARVC);Focal adhesion;Vibrio cholerae infection;Pathogenic Escherichia coli infection;Gastric acid secretion;Regulation of actin cytoskeleton;Hypertrophic cardiomyopathy (HCM);Shigellosis;Leukocyte transendothelial migration;Dilated cardiom…
10098	0	0	0	0	18	0	36	0	20	0	0	0	TSPAN5;tetraspanin 5	GO:0005886//plasma membrane;GO:0016021//integral component of membrane	GO:0051604//protein maturation;GO:0090002//establishment of protein localization to plasma membrane;GO:0045747//positive regulation of Notch signaling pathway	GO:0019899//enzyme binding	-
10099	45	0	0	0	6	0	0	0	44	0	2	0	TSPAN3;tetraspanin 3	GO:0070062//extracellular vesicular exosome;GO:0016021//integral component of membrane	-	-	K06497//Lysosome;K06571//Transcriptional misregulation in cancer
100996255	0	0	0	0	0	2	15	0	0	0	0	0	LOC100996255;uncharacterized LOC100996255	-	-	-	K00939//Purine metabolism;Pyrimidine metabolism;Biosynthesis of secondary metabolites;Metabolic pathways;K11447//Transcriptional misregulation in cancer
100996279	0	0	0	0	0	0	0	0	5	0	0	0	LINC00269;long intergenic non-protein coding RNA 269	-	-	-	K00939//Purine metabolism;Pyrimidine metabolism;Biosynthesis of secondary metabolites;Metabolic pathways;K14209//Protein digestion and absorption;K11447//Transcriptional misregulation in cancer
100996291	0	0	0	0	0	0	0	0	14	45	17	0	LOC100996291;uncharacterized LOC100996291	-	-	-	K00939//Metabolic pathways;Biosynthesis of secondary metabolites;Pyrimidine metabolism;Purine metabolism;K11447//Transcriptional misregulation in cancer;K00797//beta-Alanine metabolism;Metabolic pathways;Arginine and proline metabolism;Glutathione metabolism;Cysteine and methionine metabolism;Ribosome
100996295	105	59	0	26	8	10	0	205	19	0	20	0	DNAH17-AS1;DNAH17 antisense RNA 1	-	-	-	K00939//Biosynthesis of secondary metabolites;Pyrimidine metabolism;Purine metabolism;Metabolic pathways;K11447//Transcriptional misregulation in cancer;K01539//Oxidative phosphorylation;Bile secretion;Proximal tubule bicarbonate reclamation;Gastric acid secretion;Cardiac muscle contraction;Protein digestion and absorption;Salivary secretion;Carbohydrate digestion and absorption;Aldosterone-regul…
100996307	0	0	0	0	0	19	0	1	13	0	0	0	LIPE-AS1;LIPE antisense RNA 1	-	-	-	-
100996348	0	0	0	0	0	0	0	0	11	0	0	0	LOC100996348;uncharacterized LOC100996348	-	-	-	K01672//Bile secretion;Proximal tubule bicarbonate reclamation;Gastric acid secretion;Nitrogen metabolism;Pancreatic secretion;Collecting duct acid secretion
100996351	60	0	43	38	73	0	0	102	44	0	99	0	LOC100996351;uncharacterized LOC100996351	-	-	-	K04637//Chagas disease (American trypanosomiasis);Calcium signaling pathway;Amoebiasis
100996455	0	0	0	0	0	0	0	0	9	0	0	0	LOC100996455;uncharacterized LOC100996455	-	-	-	K00591//Ubiquinone and other terpenoid-quinone biosynthesis;Biosynthesis of secondary metabolites;Metabolic pathways;K01539//Gastric acid secretion;Proximal tubule bicarbonate reclamation;Bile secretion;Oxidative phosphorylation;Mineral absorption;Endocrine and other factor-regulated calcium reabsorption;Pancreatic secretion;Aldosterone-regulated sodium reabsorption;Carbohydrate digestion and abs…
100996485	0	189	262	380	266	0	50	116	10	0	776	1	C5orf66;chromosome 5 open reading frame 66	-	-	-	K11251//Systemic lupus erythematosus;Alcoholism
100996492	18	0	0	0	0	0	0	0	10	0	11	0	LINC01314;long intergenic non-protein coding RNA 1314	-	-	-	-
100996634	0	0	0	0	0	7	0	0	18	2	0	0	LOC100996634;transmembrane protein FLJ37396	-	-	-	-
100996648	0	0	0	0	0	1	10	0	0	0	0	5	TCP11X2;t-complex 11 family, X-linked 2	-	-	-	-
100996693	0	24	0	0	0	0	12	9	25	0	6	0	LOC100996693;CAVP-target protein-like	-	-	-	-
100996702	0	0	0	0	0	0	0	0	14	73	0	0	LINC01356;long intergenic non-protein coding RNA 1356	-	-	-	K00591//Metabolic pathways;Biosynthesis of secondary metabolites;Ubiquinone and other terpenoid-quinone biosynthesis;K00939//Metabolic pathways;Biosynthesis of secondary metabolites;Pyrimidine metabolism;Purine metabolism
100996712	0	0	0	0	0	0	0	0	4	0	0	0	SRGAP2D;SLIT-ROBO Rho GTPase activating protein 2D (pseudogene)	-	-	-	K07526//Axon guidance
101	0	0	1	0	0	0	25	55	20	217	11	0	ADAM8;ADAM metallopeptidase domain 8	GO:0071133//alpha9-beta1 integrin-ADAM8 complex;GO:0070820//tertiary granule;GO:0032010//phagolysosome;GO:0002102//podosome;GO:0005887//integral component of plasma membrane;GO:0071065//alpha9-beta1 integrin-vascular cell adhesion molecule-1 complex;GO:0005886//plasma membrane;GO:0009986//cell surface;GO:0032127//dense core granule membrane;GO:0005737//cytoplasm;GO:0042581//specific granule	GO:0070245//positive regulation of thymocyte apoptotic process;GO:0051897//positive regulation of protein kinase B signaling;GO:0030198//extracellular matrix organization;GO:2000415//positive regulation of fibronectin-dependent thymocyte migration;GO:0001525//angiogenesis;GO:0051092//positive regulation of NF-kappaB transcription factor activity;GO:0071456//cellular response to hypoxia;GO:2000391…	GO:0005515//protein binding;GO:0008237//metallopeptidase activity;GO:0043621//protein self-association;GO:0005509//calcium ion binding;GO:0050839//cell adhesion molecule binding;GO:0008270//zinc ion binding;GO:0004222//metalloendopeptidase activity	-
1010	0	0	0	0	0	0	0	2	40	50	0	0	CDH12;cadherin 12, type 2 (N-cadherin 2)	GO:0005886//plasma membrane;GO:0016021//integral component of membrane	GO:0007156//homophilic cell adhesion via plasma membrane adhesion molecules;GO:0034329//cell junction assembly;GO:0045216//cell-cell junction organization;GO:0034332//adherens junction organization	GO:0005509//calcium ion binding	-
10100	0	0	0	0	0	12	0	0	0	0	0	0	TSPAN2;tetraspanin 2	GO:0043209//myelin sheath;GO:0016021//integral component of membrane;GO:0005886//plasma membrane	GO:0007420//brain development;GO:0014002//astrocyte development;GO:0042552//myelination;GO:0014005//microglia development;GO:0006954//inflammatory response;GO:0061564//axon development;GO:0048709//oligodendrocyte differentiation	-	K06460//Hematopoietic cell lineage
10101	0	0	28	0	1	0	21	0	8	0	0	0	NUBP2;nucleotide binding protein 2	GO:0031616//spindle pole centrosome;GO:0005737//cytoplasm;GO:0005634//nucleus	GO:0044281//small molecule metabolic process;GO:0016226//iron-sulfur cluster assembly	GO:0051539//4 iron, 4 sulfur cluster binding;GO:0005524//ATP binding;GO:0046872//metal ion binding;GO:0000166//nucleotide binding;GO:0005515//protein binding	-
10102	0	0	0	10	0	0	18	0	20	0	0	0	TSFM;Ts translation elongation factor, mitochondrial	GO:0005739//mitochondrion;GO:0005634//nucleus	GO:0006414//translational elongation;GO:0032784//regulation of DNA-templated transcription, elongation	GO:0044822//poly(A) RNA binding;GO:0003746//translation elongation factor activity	-
10103	0	0	0	0	4	0	12	0	0	0	0	0	TSPAN1;tetraspanin 1	GO:0048471//perinuclear region of cytoplasm;GO:0005765//lysosomal membrane;GO:0031982//vesicle;GO:0005737//cytoplasm;GO:0005886//plasma membrane;GO:0070062//extracellular vesicular exosome;GO:0016020//membrane;GO:0016021//integral component of membrane	GO:0045807//positive regulation of endocytosis;GO:0050821//protein stabilization;GO:0008283//cell proliferation;GO:0016477//cell migration;GO:0071934//thiamine transmembrane transport	GO:0005515//protein binding;GO:0015403//thiamine uptake transmembrane transporter activity	K06509//p53 signaling pathway
10105	0	0	0	0	13	0	0	59	0	0	0	1	PPIF;peptidylprolyl isomerase F	GO:0005759//mitochondrial matrix;GO:0005753//mitochondrial proton-transporting ATP synthase complex;GO:0016020//membrane	GO:0070266//necroptotic process;GO:0090201//negative regulation of release of cytochrome c from mitochondria;GO:0010939//regulation of necrotic cell death;GO:0008637//apoptotic mitochondrial changes;GO:0071243//cellular response to arsenic-containing substance;GO:1902445//regulation of mitochondrial membrane permeability involved in programmed necrotic cell death;GO:2001243//negative regulation o…	GO:0005515//protein binding;GO:0003755//peptidyl-prolyl cis-trans isomerase activity;GO:0016018//cyclosporin A binding	K09565//Calcium signaling pathway;Toxoplasmosis;Huntington's disease;Parkinson's disease
101059918	0	0	0	0	0	0	0	0	6	0	1	0	GOLGA8R;golgin A8 family, member R	-	-	-	-
10106	72	19	2	6	104	0	38	0	3	172	10	0	CTDSP2;CTD (carboxy-terminal domain, RNA polymerase II, polypeptide A) small phosphatase 2	GO:0005654//nucleoplasm	GO:0030968//endoplasmic reticulum unfolded protein response;GO:0044267//cellular protein metabolic process;GO:0006987//activation of signaling protein activity involved in unfolded protein response;GO:0006470//protein dephosphorylation	GO:0046872//metal ion binding;GO:0005515//protein binding;GO:0008420//CTD phosphatase activity	-
101060004	0	0	0	0	0	0	0	0	16	0	0	0	LOC101060004;uncharacterized LOC101060004	-	-	-	-
101060146	39	0	0	0	23	15	7	0	3	0	0	0	CHMP1B2P;charged multivesicular body protein 1B2, pseudogene	-	-	-	K12197//Endocytosis
101060200	0	0	0	0	0	3	0	0	13	0	0	0	ZNF891;zinc finger protein 891	GO:0005634//nucleus	GO:0006351//transcription, DNA-templated;GO:0006355//regulation of transcription, DNA-templated	GO:0003677//DNA binding;GO:0046872//metal ion binding	-
101060211	0	0	0	0	0	1	0	0	17	0	0	0	LOC101060211;cancer/testis antigen family 45 member A5-like	-	-	-	-
10109	0	42	2	60	114	0	0	14	28	0	2	303	ARPC2;actin related protein 2/3 complex, subunit 2, 34kDa	GO:0005925//focal adhesion;GO:0005829//cytosol;GO:0015629//actin cytoskeleton;GO:0005737//cytoplasm;GO:0045202//synapse;GO:0005768//endosome;GO:0005794//Golgi apparatus;GO:0005886//plasma membrane;GO:0070062//extracellular vesicular exosome;GO:0031252//cell leading edge;GO:0043005//neuron projection;GO:0005885//Arp2/3 protein complex	GO:1900026//positive regulation of substrate adhesion-dependent cell spreading;GO:0045087//innate immune response;GO:0010592//positive regulation of lamellipodium assembly;GO:0038096//Fc-gamma receptor signaling pathway involved in phagocytosis;GO:0006928//cellular component movement;GO:0034314//Arp2/3 complex-mediated actin nucleation	GO:0005515//protein binding;GO:0051015//actin filament binding;GO:0019894//kinesin binding;GO:0035650//AP-1 adaptor complex binding;GO:0071933//Arp2/3 complex binding;GO:0005200//structural constituent of cytoskeleton	K05758//Regulation of actin cytoskeleton;Bacterial invasion of epithelial cells;Salmonella infection;Pathogenic Escherichia coli infection;Fc gamma R-mediated phagocytosis;Shigellosis
10110	0	0	0	0	0	0	47	51	7	0	8	0	SGK2;serum/glucocorticoid regulated kinase 2	GO:0005634//nucleus;GO:0005829//cytosol	GO:0034220//ion transmembrane transport;GO:0032411//positive regulation of transporter activity;GO:0035556//intracellular signal transduction;GO:0055085//transmembrane transport;GO:0006468//protein phosphorylation;GO:0006979//response to oxidative stress;GO:0042127//regulation of cell proliferation;GO:0001558//regulation of cell growth	GO:0005524//ATP binding;GO:0004674//protein serine/threonine kinase activity;GO:0015459//potassium channel regulator activity;GO:0017080//sodium channel regulator activity	-
10111	67	62	57	15	162	50	59	47	103	0	12	0	RAD50;RAD50 homolog (S. cerevisiae)	GO:0005730//nucleolus;GO:0005634//nucleus;GO:0016020//membrane;GO:0000784//nuclear chromosome, telomeric region;GO:0045120//pronucleus;GO:0035861//site of double-strand break;GO:0030870//Mre11 complex;GO:0005654//nucleoplasm	GO:0006302//double-strand break repair;GO:0033674//positive regulation of kinase activity;GO:0006310//DNA recombination;GO:0007004//telomere maintenance via telomerase;GO:0090305//nucleic acid phosphodiester bond hydrolysis;GO:0006281//DNA repair;GO:0006974//cellular response to DNA damage stimulus;GO:0032508//DNA duplex unwinding;GO:0000019//regulation of mitotic recombination;GO:0000724//double…	GO:0003677//DNA binding;GO:0000014//single-stranded DNA endodeoxyribonuclease activity;GO:0030674//protein binding, bridging;GO:0008408//3'-5' exonuclease activity;GO:0005524//ATP binding;GO:0004003//ATP-dependent DNA helicase activity;GO:0008270//zinc ion binding;GO:0005515//protein binding	K10866//Homologous recombination;Non-homologous end-joining
10112	0	26	23	10	22	17	20	0	5	0	24	0	KIF20A;kinesin family member 20A	GO:0005819//spindle;GO:0005654//nucleoplasm;GO:0005874//microtubule;GO:0005794//Golgi apparatus;GO:0005871//kinesin complex	GO:0000278//mitotic cell cycle;GO:0015031//protein transport;GO:0008152//metabolic process;GO:0001578//microtubule bundle formation;GO:0006200//ATP catabolic process;GO:0000910//cytokinesis;GO:0007018//microtubule-based movement;GO:0016192//vesicle-mediated transport	GO:0016887//ATPase activity;GO:0003777//microtubule motor activity;GO:0008017//microtubule binding;GO:0019901//protein kinase binding;GO:0005524//ATP binding;GO:0005215//transporter activity	-
10113	0	35	27	1	49	6	0	0	11	0	15	0	PREB;prolactin regulatory element binding	GO:0005789//endoplasmic reticulum membrane;GO:0005634//nucleus;GO:0016020//membrane;GO:0016021//integral component of membrane;GO:0000139//Golgi membrane	GO:0043687//post-translational protein modification;GO:0048208//COPII vesicle coating;GO:0018279//protein N-linked glycosylation via asparagine;GO:0006355//regulation of transcription, DNA-templated;GO:0030968//endoplasmic reticulum unfolded protein response;GO:0006888//ER to Golgi vesicle-mediated transport;GO:0006351//transcription, DNA-templated;GO:0006987//activation of signaling protein acti…	GO:0003677//DNA binding	K14003//Protein processing in endoplasmic reticulum
10114	204	20	3	56	359	13	0	0	49	0	18	0	HIPK3;homeodomain interacting protein kinase 3	GO:0005634//nucleus;GO:0005737//cytoplasm;GO:0016605//PML body	GO:0006355//regulation of transcription, DNA-templated;GO:0009299//mRNA transcription;GO:0018105//peptidyl-serine phosphorylation;GO:0043508//negative regulation of JUN kinase activity;GO:0006915//apoptotic process;GO:0018107//peptidyl-threonine phosphorylation;GO:0043066//negative regulation of apoptotic process;GO:0006468//protein phosphorylation	GO:0005524//ATP binding;GO:0004674//protein serine/threonine kinase activity;GO:0004672//protein kinase activity	-
10116	0	16	0	54	153	7	26	1	9	0	15	0	FEM1B;fem-1 homolog b (C. elegans)	GO:0005737//cytoplasm;GO:0005634//nucleus;GO:0005730//nucleolus	GO:0016567//protein ubiquitination;GO:0060743//epithelial cell maturation involved in prostate gland development;GO:0051438//regulation of ubiquitin-protein transferase activity;GO:1902041//regulation of extrinsic apoptotic signaling pathway via death domain receptors;GO:2000001//regulation of DNA damage checkpoint;GO:0060442//branching involved in prostate gland morphogenesis;GO:0006915//apoptot…	GO:0005123//death receptor binding;GO:0004842//ubiquitin-protein transferase activity;GO:0005515//protein binding	-
10117	0	0	0	0	0	0	31	0	47	1	0	703	ENAM;enamelin	GO:0005578//proteinaceous extracellular matrix	GO:0097186//amelogenesis;GO:0031214//biomineral tissue development	-	K03006//Herpes simplex infection;Huntington's disease;Metabolic pathways;Pyrimidine metabolism;Purine metabolism;Epstein-Barr virus infection;RNA polymerase
101180976	0	0	0	0	0	0	0	0	25	0	35	0	IFNL4;interferon, lambda 4 (gene/pseudogene)	GO:0005737//cytoplasm;GO:0005615//extracellular space	GO:0042502//tyrosine phosphorylation of Stat2 protein;GO:0042508//tyrosine phosphorylation of Stat1 protein;GO:0050778//positive regulation of immune response;GO:0051607//defense response to virus	GO:0005125//cytokine activity	K05447//Jak-STAT signaling pathway;Cytokine-cytokine receptor interaction
1012	156	0	0	9	13	60	22	0	54	0	38	0	CDH13;cadherin 13	GO:0048471//perinuclear region of cytoplasm;GO:0005901//caveola;GO:0005925//focal adhesion;GO:0005615//extracellular space;GO:0005737//cytoplasm;GO:0031225//anchored component of membrane;GO:0070062//extracellular vesicular exosome;GO:0009897//external side of plasma membrane;GO:0005886//plasma membrane;GO:0043005//neuron projection	GO:0034329//cell junction assembly;GO:0030335//positive regulation of cell migration;GO:0008285//negative regulation of cell proliferation;GO:0001938//positive regulation of endothelial cell proliferation;GO:0043616//keratinocyte proliferation;GO:0001954//positive regulation of cell-matrix adhesion;GO:0030100//regulation of endocytosis;GO:0007156//homophilic cell adhesion via plasma membrane adhe…	GO:0042803//protein homodimerization activity;GO:0045296//cadherin binding;GO:0030169//low-density lipoprotein particle binding;GO:0005509//calcium ion binding;GO:0071813//lipoprotein particle binding;GO:0055100//adiponectin binding	-
10120	1	0	0	15	29	0	18	0	18	0	0	0	ACTR1B;ARP1 actin-related protein 1 homolog B, centractin beta (yeast)	GO:0016020//membrane;GO:0005829//cytosol;GO:0005869//dynactin complex;GO:0070062//extracellular vesicular exosome;GO:0005737//cytoplasm;GO:0005813//centrosome	GO:0019886//antigen processing and presentation of exogenous peptide antigen via MHC class II	GO:0005515//protein binding;GO:0005524//ATP binding	K05692//Bacterial invasion of epithelial cells;Tight junction;Leukocyte transendothelial migration;Shigellosis;Dilated cardiomyopathy;Regulation of actin cytoskeleton;Hypertrophic cardiomyopathy (HCM);Vibrio cholerae infection;Focal adhesion;Gastric acid secretion;Pathogenic Escherichia coli infection;Phagosome;Salmonella infection;Arrhythmogenic right ventricular cardiomyopathy (ARVC);Influenza …
10121	0	33	1	16	115	0	0	22	7	0	34	0	ACTR1A;ARP1 actin-related protein 1 homolog A, centractin alpha (yeast)	GO:0005875//microtubule associated complex;GO:0070062//extracellular vesicular exosome;GO:0005829//cytosol;GO:0005869//dynactin complex;GO:0005737//cytoplasm;GO:0005813//centrosome	GO:0019886//antigen processing and presentation of exogenous peptide antigen via MHC class II;GO:0016192//vesicle-mediated transport;GO:0000278//mitotic cell cycle;GO:0000086//G2/M transition of mitotic cell cycle	GO:0005524//ATP binding	K05692//Hypertrophic cardiomyopathy (HCM);Regulation of actin cytoskeleton;Gastric acid secretion;Pathogenic Escherichia coli infection;Vibrio cholerae infection;Focal adhesion;Tight junction;Bacterial invasion of epithelial cells;Dilated cardiomyopathy;Shigellosis;Leukocyte transendothelial migration;Viral myocarditis;Adherens junction;Phototransduction - fly;Arrhythmogenic right ventricular car…
10123	0	0	0	0	0	6	0	0	13	0	0	0	ARL4C;ADP-ribosylation factor-like 4C	GO:0005634//nucleus;GO:0005737//cytoplasm;GO:0030175//filopodium;GO:0005886//plasma membrane	GO:0032456//endocytic recycling;GO:0006184//GTP catabolic process;GO:0007264//small GTPase mediated signal transduction	GO:0003924//GTPase activity;GO:0005525//GTP binding;GO:0043014//alpha-tubulin binding;GO:0005515//protein binding	-
10124	0	0	0	0	8	0	0	0	41	0	0	0	ARL4A;ADP-ribosylation factor-like 4A	GO:0005634//nucleus;GO:0005737//cytoplasm;GO:0005730//nucleolus;GO:0005886//plasma membrane	GO:0050873//brown fat cell differentiation;GO:0007264//small GTPase mediated signal transduction	GO:0005525//GTP binding;GO:0005515//protein binding	-
101243544	0	0	0	0	0	0	1	0	0	0	0	0	ERCC6-PGBD3;ERCC6-PGBD3 readthrough	-	-	-	K10841//Nucleotide excision repair
10125	17	40	34	0	18	0	17	0	9	0	0	0	RASGRP1;RAS guanyl releasing protein 1 (calcium and DAG-regulated)	GO:0005789//endoplasmic reticulum membrane;GO:0005886//plasma membrane;GO:0000139//Golgi membrane;GO:0016020//membrane;GO:0042629//mast cell granule;GO:0005829//cytosol	GO:0007265//Ras protein signal transduction;GO:0030168//platelet activation;GO:0007165//signal transduction;GO:0032252//secretory granule localization;GO:0045087//innate immune response;GO:0030154//cell differentiation;GO:0038095//Fc-epsilon receptor signaling pathway;GO:0047496//vesicle transport along microtubule;GO:0001816//cytokine production;GO:0002437//inflammatory response to antigenic sti…	GO:0005085//guanyl-nucleotide exchange factor activity;GO:0008289//lipid binding;GO:0005509//calcium ion binding	K04350//T cell receptor signaling pathway;MAPK signaling pathway
10126	0	24	0	1	33	0	0	0	0	0	0	0	DNAL4;dynein, axonemal, light chain 4	GO:0005886//plasma membrane;GO:0005929//cilium;GO:0030286//dynein complex;GO:0005737//cytoplasm;GO:0005874//microtubule	GO:0048011//neurotrophin TRK receptor signaling pathway;GO:0008152//metabolic process;GO:0007017//microtubule-based process	GO:0003774//motor activity	K10412//Huntington's disease
10127	0	0	0	0	13	0	0	0	69	0	9	0	ZNF263;zinc finger protein 263	GO:0005634//nucleus;GO:0005737//cytoplasm;GO:0015630//microtubule cytoskeleton;GO:0005730//nucleolus	GO:0006355//regulation of transcription, DNA-templated;GO:0006351//transcription, DNA-templated;GO:0045892//negative regulation of transcription, DNA-templated	GO:0003677//DNA binding;GO:0046872//metal ion binding;GO:0003700//sequence-specific DNA binding transcription factor activity	-
10128	75	106	1	65	116	17	0	0	43	0	7	0	LRPPRC;leucine-rich pentatricopeptide repeat containing	GO:0042645//mitochondrial nucleoid;GO:0005739//mitochondrion;GO:0000794//condensed nuclear chromosome;GO:0005637//nuclear inner membrane;GO:0005874//microtubule;GO:0048471//perinuclear region of cytoplasm;GO:0005634//nucleus;GO:0005640//nuclear outer membrane;GO:0016020//membrane;GO:0030529//ribonucleoprotein complex;GO:0005654//nucleoplasm;GO:0005856//cytoskeleton	GO:0006351//transcription, DNA-templated;GO:0051028//mRNA transport;GO:0000961//negative regulation of mitochondrial RNA catabolic process;GO:0006355//regulation of transcription, DNA-templated;GO:0047497//mitochondrion transport along microtubule;GO:0070129//regulation of mitochondrial translation	GO:0003723//RNA binding;GO:0005515//protein binding;GO:0044822//poly(A) RNA binding;GO:0008017//microtubule binding;GO:0003697//single-stranded DNA binding;GO:0051015//actin filament binding;GO:0048487//beta-tubulin binding	K00939//Purine metabolism;Pyrimidine metabolism;Biosynthesis of secondary metabolites;Metabolic pathways;K11447//Transcriptional misregulation in cancer;K06264//ECM-receptor interaction
10129	101	0	0	0	0	52	29	0	156	0	22	0	FRY;furry homolog (Drosophila)	GO:0005815//microtubule organizing center;GO:0000922//spindle pole;GO:0005737//cytoplasm	-	-	-
1013	100	0	0	0	0	12	27	0	36	0	0	0	CDH15;cadherin 15, type 1, M-cadherin (myotubule)	GO:0016021//integral component of membrane;GO:0031594//neuromuscular junction;GO:0070062//extracellular vesicular exosome;GO:0005886//plasma membrane;GO:0005901//caveola	GO:0051149//positive regulation of muscle cell differentiation;GO:0034332//adherens junction organization;GO:0007155//cell adhesion;GO:0045216//cell-cell junction organization;GO:0042692//muscle cell differentiation;GO:0007156//homophilic cell adhesion via plasma membrane adhesion molecules;GO:0034329//cell junction assembly	GO:0005509//calcium ion binding	K06809//Cell adhesion molecules (CAMs)
10130	3	0	3	24	50	11	17	0	37	0	15	0	PDIA6;protein disulfide isomerase family A, member 6	GO:0042470//melanosome;GO:0005783//endoplasmic reticulum;GO:0070062//extracellular vesicular exosome;GO:0005886//plasma membrane;GO:0005789//endoplasmic reticulum membrane;GO:0005793//endoplasmic reticulum-Golgi intermediate compartment;GO:0005788//endoplasmic reticulum lumen	GO:0043277//apoptotic cell clearance;GO:0044267//cellular protein metabolic process;GO:0030968//endoplasmic reticulum unfolded protein response;GO:0045454//cell redox homeostasis;GO:0034976//response to endoplasmic reticulum stress;GO:0006987//activation of signaling protein activity involved in unfolded protein response;GO:0006457//protein folding	GO:0005515//protein binding;GO:0003756//protein disulfide isomerase activity	K09584//Protein processing in endoplasmic reticulum
10131	0	31	50	35	77	11	14	52	29	1	41	0	TRAP1;TNF receptor-associated protein 1	GO:0005634//nucleus;GO:0005759//mitochondrial matrix;GO:0005743//mitochondrial inner membrane;GO:0005730//nucleolus;GO:0070062//extracellular vesicular exosome;GO:0005739//mitochondrion;GO:0016020//membrane	GO:0061077//chaperone-mediated protein folding;GO:1901856//negative regulation of cellular respiration;GO:0034599//cellular response to oxidative stress	GO:0005524//ATP binding;GO:0051082//unfolded protein binding;GO:0005164//tumor necrosis factor receptor binding;GO:0005515//protein binding;GO:0044822//poly(A) RNA binding	-
10133	0	0	0	18	5	11	6	0	50	0	0	0	OPTN;optineurin	GO:0000139//Golgi membrane;GO:0005829//cytosol;GO:0005794//Golgi apparatus;GO:0005654//nucleoplasm;GO:0005802//trans-Golgi network;GO:0005737//cytoplasm;GO:0048471//perinuclear region of cytoplasm	GO:0000086//G2/M transition of mitotic cell cycle;GO:0000278//mitotic cell cycle;GO:0007030//Golgi organization;GO:0000042//protein targeting to Golgi;GO:0007165//signal transduction;GO:0050829//defense response to Gram-negative bacterium;GO:0016236//macroautophagy;GO:0090161//Golgi ribbon formation;GO:0043001//Golgi to plasma membrane protein transport;GO:0008219//cell death;GO:0001920//negative…	GO:0005515//protein binding;GO:0031593//polyubiquitin binding;GO:0017137//Rab GTPase binding;GO:0008022//protein C-terminus binding	K07210//NF-kappa B signaling pathway;Pancreatic cancer;Primary immunodeficiency;Chemokine signaling pathway;Pathways in cancer;Toll-like receptor signaling pathway;Small cell lung cancer;Prostate cancer;Chronic myeloid leukemia;Herpes simplex infection;MAPK signaling pathway;T cell receptor signaling pathway;Apoptosis;RIG-I-like receptor signaling pathway;Epstein-Barr virus infection;Epithelial c…
10134	0	0	0	16	0	12	0	12	12	0	17	0	BCAP31;B-cell receptor-associated protein 31	GO:0005789//endoplasmic reticulum membrane;GO:0005887//integral component of plasma membrane;GO:0071556//integral component of lumenal side of endoplasmic reticulum membrane;GO:0005829//cytosol;GO:0000139//Golgi membrane;GO:0016020//membrane;GO:0005783//endoplasmic reticulum;GO:0005811//lipid particle;GO:0033116//endoplasmic reticulum-Golgi intermediate compartment membrane	GO:0032471//negative regulation of endoplasmic reticulum calcium ion concentration;GO:0007204//positive regulation of cytosolic calcium ion concentration;GO:0002474//antigen processing and presentation of peptide antigen via MHC class I;GO:0006921//cellular component disassembly involved in execution phase of apoptosis;GO:0006886//intracellular protein transport;GO:0006888//ER to Golgi vesicle-me…	GO:0005515//protein binding;GO:0042288//MHC class I protein binding;GO:0032403//protein complex binding	K14009//Protein processing in endoplasmic reticulum
101340251	0	0	0	0	0	4	0	0	0	0	0	0	SNORD124;small nucleolar RNA, C/D box 124	-	-	-	-
10135	0	130	4	157	559	0	48	0	29	0	0	147	NAMPT;nicotinamide phosphoribosyltransferase	GO:0005829//cytosol;GO:0005615//extracellular space;GO:0070062//extracellular vesicular exosome;GO:0005634//nucleus	GO:0008286//insulin receptor signaling pathway;GO:0060612//adipose tissue development;GO:0032922//circadian regulation of gene expression;GO:0019674//NAD metabolic process;GO:0009435//NAD biosynthetic process;GO:0006766//vitamin metabolic process;GO:0044281//small molecule metabolic process;GO:0051770//positive regulation of nitric-oxide synthase biosynthetic process;GO:0007165//signal transducti…	GO:0005515//protein binding;GO:0005125//cytokine activity;GO:0047280//nicotinamide phosphoribosyltransferase activity;GO:0004514//nicotinate-nucleotide diphosphorylase (carboxylating) activity	K03462//Nicotinate and nicotinamide metabolism
10137	0	56	1	38	166	0	8	0	34	0	0	0	RBM12;RNA binding motif protein 12	GO:0005730//nucleolus;GO:0005634//nucleus	-	GO:0000166//nucleotide binding;GO:0044822//poly(A) RNA binding	-
10138	0	0	0	0	0	0	18	113	163	1	0	0	YAF2;YY1 associated factor 2	GO:0005730//nucleolus;GO:0005634//nucleus;GO:0005737//cytoplasm	GO:0045892//negative regulation of transcription, DNA-templated;GO:0006351//transcription, DNA-templated;GO:0045893//positive regulation of transcription, DNA-templated	GO:0008270//zinc ion binding;GO:0005515//protein binding;GO:0003713//transcription coactivator activity;GO:0003714//transcription corepressor activity	-
10139	0	0	0	0	0	10	0	1	45	0	0	0	ARFRP1;ADP-ribosylation factor related protein 1	GO:0005802//trans-Golgi network;GO:0016020//membrane;GO:0005794//Golgi apparatus	GO:0043001//Golgi to plasma membrane protein transport;GO:0007369//gastrulation;GO:0007264//small GTPase mediated signal transduction;GO:0006184//GTP catabolic process;GO:0034067//protein localization to Golgi apparatus;GO:0042147//retrograde transport, endosome to Golgi;GO:0007165//signal transduction	GO:0005525//GTP binding;GO:0003924//GTPase activity;GO:0005515//protein binding	-
1014	0	0	0	5	0	15	18	44	15	0	6	0	CDH16;cadherin 16, KSP-cadherin	GO:0070062//extracellular vesicular exosome;GO:0016323//basolateral plasma membrane;GO:0016021//integral component of membrane	GO:0007155//cell adhesion;GO:0016339//calcium-dependent cell-cell adhesion via plasma membrane cell adhesion molecules;GO:0007156//homophilic cell adhesion via plasma membrane adhesion molecules	GO:0005509//calcium ion binding	-
10140	0	64	0	22	146	5	0	0	18	0	41	0	TOB1;transducer of ERBB2, 1	GO:0030014//CCR4-NOT complex;GO:0005737//cytoplasm;GO:0005634//nucleus	GO:1900153//positive regulation of nuclear-transcribed mRNA catabolic process, deadenylation-dependent decay;GO:0008285//negative regulation of cell proliferation;GO:2001141//regulation of RNA biosynthetic process;GO:0060213//positive regulation of nuclear-transcribed mRNA poly(A) tail shortening;GO:0045668//negative regulation of osteoblast differentiation;GO:0060212//negative regulation of nucl…	GO:0005515//protein binding;GO:0003714//transcription corepressor activity;GO:0030971//receptor tyrosine kinase binding;GO:0046332//SMAD binding;GO:0005070//SH3/SH2 adaptor activity	K14443//RNA degradation
101410538	0	25	0	1	19	0	0	0	11	0	31	0	MMP24-AS1;MMP24 antisense RNA 1	-	-	-	-
10142	0	0	39	35	43	50	39	64	109	0	4	0	AKAP9;A kinase (PRKA) anchor protein 9	GO:0005856//cytoskeleton;GO:0005813//centrosome;GO:0005794//Golgi apparatus;GO:0036064//ciliary basal body;GO:0008076//voltage-gated potassium channel complex;GO:0000242//pericentriolar material;GO:0043231//intracellular membrane-bounded organelle;GO:0005829//cytosol	GO:0007165//signal transduction;GO:0007268//synaptic transmission;GO:0000278//mitotic cell cycle;GO:0000086//G2/M transition of mitotic cell cycle;GO:0007283//spermatogenesis;GO:0060009//Sertoli cell development;GO:0006810//transport	GO:0032947//protein complex scaffold;GO:0005102//receptor binding;GO:0005515//protein binding;GO:0044325//ion channel binding	-
10143	63	0	0	0	0	0	28	0	0	0	0	0	CLEC3A;C-type lectin domain family 3, member A	GO:0005576//extracellular region	GO:0001501//skeletal system development	GO:0030246//carbohydrate binding	K03991//Phagosome;Staphylococcus aureus infection;Complement and coagulation cascades;K12589//RNA degradation
10144	63	43	0	29	44	17	3	0	110	0	2	0	FAM13A;family with sequence similarity 13, member A	GO:0005829//cytosol	GO:0051056//regulation of small GTPase mediated signal transduction;GO:0007264//small GTPase mediated signal transduction;GO:0043547//positive regulation of GTPase activity	GO:0005096//GTPase activator activity	K08773//Pathways in cancer;Pancreatic cancer;K07526//Axon guidance
10146	117	64	0	54	181	0	0	0	51	0	0	0	G3BP1;GTPase activating protein (SH3 domain) binding protein 1	GO:0005886//plasma membrane;GO:0005925//focal adhesion;GO:0005829//cytosol;GO:0005737//cytoplasm;GO:0005634//nucleus;GO:0010494//cytoplasmic stress granule	GO:0006200//ATP catabolic process;GO:0032508//DNA duplex unwinding;GO:0090305//nucleic acid phosphodiester bond hydrolysis;GO:0007265//Ras protein signal transduction;GO:0090090//negative regulation of canonical Wnt signaling pathway;GO:0006810//transport	GO:0004519//endonuclease activity;GO:0005515//protein binding;GO:0004004//ATP-dependent RNA helicase activity;GO:0044822//poly(A) RNA binding;GO:0003677//DNA binding;GO:0003729//mRNA binding;GO:0004003//ATP-dependent DNA helicase activity;GO:0005524//ATP binding	K12741//Spliceosome
10147	48	35	0	43	134	2	30	0	37	0	3	4	SUGP2;SURP and G patch domain containing 2	GO:0005634//nucleus	GO:0008380//RNA splicing;GO:0006397//mRNA processing	GO:0044822//poly(A) RNA binding	-
10148	0	0	0	0	0	0	0	0	7	0	0	0	EBI3;Epstein-Barr virus induced 3	GO:0005615//extracellular space;GO:0005886//plasma membrane	GO:0019221//cytokine-mediated signaling pathway;GO:0042088//T-helper 1 type immune response;GO:0046641//positive regulation of alpha-beta T cell proliferation;GO:0006959//humoral immune response;GO:0045078//positive regulation of interferon-gamma biosynthetic process	GO:0005515//protein binding;GO:0005125//cytokine activity;GO:0045523//interleukin-27 receptor binding;GO:0004896//cytokine receptor activity	K05059//Jak-STAT signaling pathway;Cytokine-cytokine receptor interaction;K05056//Amino sugar and nucleotide sugar metabolism;Galactose metabolism;Cytokine-cytokine receptor interaction;Hematopoietic cell lineage;Jak-STAT signaling pathway;Metabolic pathways
10149	0	0	13	62	65	1	1	0	45	0	92	0	GPR64;G protein-coupled receptor 64	GO:0005887//integral component of plasma membrane;GO:0016324//apical plasma membrane;GO:0009986//cell surface;GO:0016021//integral component of membrane;GO:0070062//extracellular vesicular exosome	GO:0007218//neuropeptide signaling pathway;GO:0007283//spermatogenesis;GO:0007186//G-protein coupled receptor signaling pathway	GO:0004930//G-protein coupled receptor activity	-
1015	2	0	0	0	0	1	3	0	28	1	0	0	CDH17;cadherin 17, LI cadherin (liver-intestine)	GO:0016021//integral component of membrane;GO:0016323//basolateral plasma membrane	GO:0007156//homophilic cell adhesion via plasma membrane adhesion molecules;GO:0016339//calcium-dependent cell-cell adhesion via plasma membrane cell adhesion molecules;GO:0006857//oligopeptide transport;GO:0007155//cell adhesion;GO:0035672//oligopeptide transmembrane transport;GO:0006810//transport	GO:0005509//calcium ion binding;GO:0005215//transporter activity;GO:0005427//proton-dependent oligopeptide secondary active transmembrane transporter activity	-
10150	0	1	0	22	54	0	1	0	0	0	0	0	MBNL2;muscleblind-like splicing regulator 2	GO:0005737//cytoplasm;GO:0005634//nucleus	GO:0043484//regulation of RNA splicing;GO:0000381//regulation of alternative mRNA splicing, via spliceosome;GO:0006397//mRNA processing;GO:0008380//RNA splicing	GO:0044822//poly(A) RNA binding;GO:0046872//metal ion binding	-
10151	0	0	0	0	0	3	0	0	16	0	0	0	HNRNPA3P1;heterogeneous nuclear ribonucleoprotein A3 pseudogene 1	-	-	-	K12741//Spliceosome
10152	122	20	31	88	153	45	0	148	119	1	37	1	ABI2;abl-interactor 2	GO:0030175//filopodium;GO:0005829//cytosol;GO:0031209//SCAR complex;GO:0005737//cytoplasm;GO:0005856//cytoskeleton;GO:0030027//lamellipodium	GO:0016477//cell migration;GO:0008154//actin polymerization or depolymerization;GO:0016601//Rac protein signal transduction;GO:0006928//cellular component movement;GO:0007010//cytoskeleton organization;GO:2000601//positive regulation of Arp2/3 complex-mediated actin nucleation;GO:0018108//peptidyl-tyrosine phosphorylation	GO:0032403//protein complex binding;GO:0048365//Rac GTPase binding;GO:0070064//proline-rich region binding;GO:0031625//ubiquitin protein ligase binding;GO:0017124//SH3 domain binding;GO:0003677//DNA binding;GO:0019900//kinase binding;GO:0005515//protein binding;GO:0008093//cytoskeletal adaptor activity	K05751//Regulation of actin cytoskeleton
10153	0	125	212	423	1362	0	0	0	48	0	834	7	CEBPZ;CCAAT/enhancer binding protein (C/EBP), zeta	GO:0005634//nucleus	GO:0045944//positive regulation of transcription from RNA polymerase II promoter;GO:0006366//transcription from RNA polymerase II promoter	GO:0000978//RNA polymerase II core promoter proximal region sequence-specific DNA binding;GO:0001077//RNA polymerase II core promoter proximal region sequence-specific DNA binding transcription factor activity involved in positive regulation of transcription;GO:0003677//DNA binding;GO:0044822//poly(A) RNA binding	-
10154	0	0	0	0	0	54	61	0	74	0	0	0	PLXNC1;plexin C1	GO:0005886//plasma membrane;GO:0005622//intracellular;GO:0016020//membrane;GO:0016021//integral component of membrane	GO:0007155//cell adhesion;GO:0007411//axon guidance;GO:0007165//signal transduction	GO:0005102//receptor binding;GO:0004872//receptor activity;GO:0005515//protein binding	K06572//Axon guidance
10155	0	2	3	17	36	53	0	31	4	0	12	0	TRIM28;tripartite motif containing 28	GO:0005634//nucleus;GO:0005654//nucleoplasm;GO:0005720//nuclear heterochromatin;GO:0005719//nuclear euchromatin	GO:0006281//DNA repair;GO:0042993//positive regulation of transcription factor import into nucleus;GO:0046777//protein autophosphorylation;GO:0016925//protein sumoylation;GO:0045892//negative regulation of transcription, DNA-templated;GO:0060669//embryonic placenta morphogenesis;GO:0001837//epithelial to mesenchymal transition;GO:0051259//protein oligomerization;GO:0045087//innate immune response…	GO:0043565//sequence-specific DNA binding;GO:0016874//ligase activity;GO:0004672//protein kinase activity;GO:0031625//ubiquitin protein ligase binding;GO:0003677//DNA binding;GO:0003714//transcription corepressor activity;GO:0003713//transcription coactivator activity;GO:0044822//poly(A) RNA binding;GO:0005515//protein binding;GO:0004842//ubiquitin-protein transferase activity;GO:0003700//sequenc…	-
10156	0	0	0	0	0	0	0	0	7	0	0	0	RASA4;RAS p21 protein activator 4	GO:0005829//cytosol;GO:0005737//cytoplasm;GO:0031235//intrinsic component of the cytoplasmic side of the plasma membrane	GO:0032320//positive regulation of Ras GTPase activity;GO:0046580//negative regulation of Ras protein signal transduction;GO:0035556//intracellular signal transduction	GO:0005096//GTPase activator activity;GO:0005099//Ras GTPase activator activity;GO:0046872//metal ion binding	K12380//MAPK signaling pathway - fly;K08053//MAPK signaling pathway
10157	78	0	0	0	25	0	3	0	44	0	7	0	AASS;aminoadipate-semialdehyde synthase	GO:0005759//mitochondrial matrix;GO:0043231//intracellular membrane-bounded organelle;GO:0005739//mitochondrion	GO:0055114//oxidation-reduction process;GO:0051262//protein tetramerization;GO:0034641//cellular nitrogen compound metabolic process;GO:0006554//lysine catabolic process;GO:0044281//small molecule metabolic process;GO:0033512//L-lysine catabolic process to acetyl-CoA via saccharopine	GO:0047130//saccharopine dehydrogenase (NADP+, L-lysine-forming) activity;GO:0047131//saccharopine dehydrogenase (NAD+, L-glutamate-forming) activity	K14157//Metabolic pathways;Biosynthesis of secondary metabolites;Lysine degradation
10158	0	0	0	0	0	51	23	32	25	0	0	0	PDZK1IP1;PDZK1 interacting protein 1	GO:0070062//extracellular vesicular exosome;GO:0016021//integral component of membrane	-	-	-
10159	82	6	0	19	0	0	0	0	8	0	13	0	ATP6AP2;ATPase, H+ transporting, lysosomal accessory protein 2	GO:0043005//neuron projection;GO:0016021//integral component of membrane;GO:0070062//extracellular vesicular exosome;GO:0005886//plasma membrane;GO:0009897//external side of plasma membrane;GO:0044297//cell body	GO:0006508//proteolysis;GO:0002003//angiotensin maturation;GO:0044267//cellular protein metabolic process;GO:0043408//regulation of MAPK cascade;GO:0030177//positive regulation of Wnt signaling pathway;GO:0060323//head morphogenesis;GO:0008219//cell death;GO:0048069//eye pigmentation;GO:0032914//positive regulation of transforming growth factor beta1 production;GO:0021903//rostrocaudal neural tub…	GO:0005515//protein binding;GO:0004190//aspartic-type endopeptidase activity;GO:0004872//receptor activity;GO:0019899//enzyme binding	-
1016	126	0	0	0	0	23	0	0	53	0	10	0	CDH18;cadherin 18, type 2	GO:0005886//plasma membrane;GO:0016021//integral component of membrane	GO:0045216//cell-cell junction organization;GO:0034329//cell junction assembly;GO:0007156//homophilic cell adhesion via plasma membrane adhesion molecules;GO:0034332//adherens junction organization	GO:0005509//calcium ion binding	-
10160	84	34	17	29	41	26	44	80	80	132	0	0	FARP1;FERM, RhoGEF (ARHGEF) and pleckstrin domain protein 1 (chondrocyte-derived)	GO:0030425//dendrite;GO:0045202//synapse;GO:0030175//filopodium;GO:0030054//cell junction;GO:0005737//cytoplasm;GO:0005856//cytoskeleton;GO:0043197//dendritic spine;GO:0005829//cytosol;GO:0031234//extrinsic component of cytoplasmic side of plasma membrane	GO:0048813//dendrite morphogenesis;GO:0010923//negative regulation of phosphatase activity;GO:0032855//positive regulation of Rac GTPase activity;GO:0032321//positive regulation of Rho GTPase activity;GO:0007416//synapse assembly	GO:0005089//Rho guanyl-nucleotide exchange factor activity;GO:0030676//Rac guanyl-nucleotide exchange factor activity;GO:0008092//cytoskeletal protein binding	K06082//Adherens junction
10161	0	0	0	0	0	0	32	0	0	0	0	0	LPAR6;lysophosphatidic acid receptor 6	GO:0016021//integral component of membrane;GO:0005886//plasma membrane	GO:0007186//G-protein coupled receptor signaling pathway	GO:0004930//G-protein coupled receptor activity	K04273//Neuroactive ligand-receptor interaction
10162	0	64	89	119	183	0	1	65	116	1	121	0	LPCAT3;lysophosphatidylcholine acyltransferase 3	GO:0005789//endoplasmic reticulum membrane;GO:0016020//membrane;GO:0016021//integral component of membrane	GO:0044281//small molecule metabolic process;GO:0036152//phosphatidylethanolamine acyl-chain remodeling;GO:0036150//phosphatidylserine acyl-chain remodeling;GO:0036151//phosphatidylcholine acyl-chain remodeling;GO:0006644//phospholipid metabolic process;GO:0046474//glycerophospholipid biosynthetic process;GO:0097006//regulation of plasma lipoprotein particle levels	GO:0047184//1-acylglycerophosphocholine O-acyltransferase activity	K13515//Glycerophospholipid metabolism
10163	53	40	1	19	159	10	64	136	37	0	38	4	WASF2;WAS protein family, member 2	GO:0005829//cytosol;GO:0015629//actin cytoskeleton;GO:0070062//extracellular vesicular exosome;GO:0005622//intracellular;GO:0030027//lamellipodium;GO:0031209//SCAR complex	GO:0010592//positive regulation of lamellipodium assembly;GO:0007188//adenylate cyclase-modulating G-protein coupled receptor signaling pathway;GO:0038096//Fc-gamma receptor signaling pathway involved in phagocytosis;GO:0030036//actin cytoskeleton organization;GO:0051497//negative regulation of stress fiber assembly;GO:0045087//innate immune response	GO:0003779//actin binding;GO:0032403//protein complex binding;GO:0005515//protein binding	K05748//Salmonella infection;Bacterial invasion of epithelial cells;Regulation of actin cytoskeleton;Fc gamma R-mediated phagocytosis;Adherens junction;Shigellosis
10164	139	0	0	0	0	0	33	0	6	0	0	0	CHST4;carbohydrate (N-acetylglucosamine 6-O) sulfotransferase 4	GO:0005802//trans-Golgi network;GO:0031228//intrinsic component of Golgi membrane;GO:0016021//integral component of membrane	GO:0005975//carbohydrate metabolic process;GO:0050901//leukocyte tethering or rolling;GO:0006790//sulfur compound metabolic process;GO:0006954//inflammatory response;GO:0007267//cell-cell signaling;GO:0007155//cell adhesion;GO:0006928//cellular component movement;GO:0006477//protein sulfation;GO:0006044//N-acetylglucosamine metabolic process;GO:0006955//immune response	GO:0001517//N-acetylglucosamine 6-O-sulfotransferase activity;GO:0008146//sulfotransferase activity	K04746//Glycosaminoglycan biosynthesis - keratan sulfate
10165	0	0	1	1	43	0	0	5	2	0	6	0	SLC25A13;solute carrier family 25 (aspartate/glutamate carrier), member 13	GO:0005887//integral component of plasma membrane;GO:0005743//mitochondrial inner membrane;GO:0005739//mitochondrion	GO:0015813//L-glutamate transport;GO:0006006//glucose metabolic process;GO:0044281//small molecule metabolic process;GO:0005975//carbohydrate metabolic process;GO:0006754//ATP biosynthetic process;GO:0051592//response to calcium ion;GO:0055085//transmembrane transport;GO:0015810//aspartate transport;GO:0043490//malate-aspartate shuttle;GO:0006810//transport;GO:0045333//cellular respiration;GO:000…	GO:0005509//calcium ion binding;GO:0005313//L-glutamate transmembrane transporter activity;GO:0015183//L-aspartate transmembrane transporter activity;GO:0005215//transporter activity	-
10166	6	0	2	33	0	0	0	32	47	0	0	0	SLC25A15;solute carrier family 25 (mitochondrial carrier; ornithine transporter) member 15	GO:0016021//integral component of membrane;GO:0005743//mitochondrial inner membrane	GO:0044281//small molecule metabolic process;GO:0006520//cellular amino acid metabolic process;GO:0034641//cellular nitrogen compound metabolic process;GO:0000050//urea cycle;GO:0000066//mitochondrial ornithine transport	GO:0000064//L-ornithine transmembrane transporter activity	-
101669764	0	0	0	0	6	0	0	0	25	0	0	0	GPR1-AS;GPR1 antisense RNA	-	-	-	K00939//Metabolic pathways;Purine metabolism;Pyrimidine metabolism;Biosynthesis of secondary metabolites;K11447//Transcriptional misregulation in cancer
10168	0	15	0	75	31	33	27	39	3	0	0	0	ZNF197;zinc finger protein 197	GO:0005634//nucleus	GO:0006351//transcription, DNA-templated;GO:0006355//regulation of transcription, DNA-templated	GO:0003700//sequence-specific DNA binding transcription factor activity;GO:0046872//metal ion binding;GO:0003677//DNA binding	-
10169	0	50	2	81	258	0	0	1	8	0	17	0	SERF2;small EDRK-rich factor 2	GO:0005829//cytosol;GO:0005634//nucleus	-	-	-
1017	0	0	0	16	9	0	0	0	0	0	0	0	CDK2;cyclin-dependent kinase 2	GO:0005634//nucleus;GO:0005667//transcription factor complex;GO:0015030//Cajal body;GO:0000805//X chromosome;GO:0000806//Y chromosome;GO:0005829//cytosol;GO:0005813//centrosome;GO:0005737//cytoplasm;GO:0000307//cyclin-dependent protein kinase holoenzyme complex;GO:0005654//nucleoplasm;GO:0000781//chromosome, telomeric region;GO:0000793//condensed chromosome;GO:0005768//endosome	GO:0000082//G1/S transition of mitotic cell cycle;GO:0071732//cellular response to nitric oxide;GO:0051298//centrosome duplication;GO:0031145//anaphase-promoting complex-dependent proteasomal ubiquitin-dependent protein catabolic process;GO:0007067//mitotic nuclear division;GO:0006281//DNA repair;GO:0016572//histone phosphorylation;GO:0007596//blood coagulation;GO:0032298//positive regulation of …	GO:0046872//metal ion binding;GO:0005515//protein binding;GO:0030332//cyclin binding;GO:0005524//ATP binding;GO:0035173//histone kinase activity;GO:0004693//cyclin-dependent protein serine/threonine kinase activity	K02206//Pathways in cancer;Progesterone-mediated oocyte maturation;Small cell lung cancer;Prostate cancer;Oocyte meiosis;Herpes simplex infection;Cell cycle;Epstein-Barr virus infection;p53 signaling pathway;Measles
10170	0	0	0	0	0	0	25	0	10	0	0	0	DHRS9;dehydrogenase/reductase (SDR family) member 9	GO:0030176//integral component of endoplasmic reticulum membrane	GO:0042904//9-cis-retinoic acid biosynthetic process;GO:0008209//androgen metabolic process;GO:0030855//epithelial cell differentiation;GO:0042572//retinol metabolic process;GO:0055114//oxidation-reduction process;GO:0042448//progesterone metabolic process	GO:0047035//testosterone dehydrogenase (NAD+) activity;GO:0004745//retinol dehydrogenase activity;GO:0004022//alcohol dehydrogenase (NAD) activity;GO:0016854//racemase and epimerase activity	K11149//Metabolic pathways;Retinol metabolism
10171	0	0	0	0	0	11	0	0	30	0	0	0	RCL1;RNA terminal phosphate cyclase-like 1	GO:0005730//nucleolus	GO:0006396//RNA processing;GO:0042254//ribosome biogenesis	GO:0003824//catalytic activity	K11108//Ribosome biogenesis in eukaryotes
10172	132	0	0	12	10	7	37	0	0	0	0	0	ZNF256;zinc finger protein 256	GO:0005634//nucleus	GO:0045892//negative regulation of transcription, DNA-templated;GO:0006351//transcription, DNA-templated;GO:0007275//multicellular organismal development	GO:0046872//metal ion binding;GO:0005515//protein binding;GO:0003700//sequence-specific DNA binding transcription factor activity;GO:0003677//DNA binding	-
101730217	0	0	0	0	0	0	0	0	9	0	0	0	SPECC1L-ADORA2A;SPECC1L-ADORA2A readthrough (NMD candidate)	-	-	-	K04266//Neuroactive ligand-receptor interaction;Calcium signaling pathway;Alcoholism;Vascular smooth muscle contraction
10174	2	0	1	2	42	34	0	62	38	147	0	166	SORBS3;sorbin and SH3 domain containing 3	GO:0005634//nucleus;GO:0005856//cytoskeleton;GO:0005829//cytosol;GO:0005925//focal adhesion	GO:0000122//negative regulation of transcription from RNA polymerase II promoter;GO:0007155//cell adhesion;GO:0007015//actin filament organization;GO:0006936//muscle contraction;GO:0051495//positive regulation of cytoskeleton organization;GO:0051496//positive regulation of stress fiber assembly;GO:0031589//cell-substrate adhesion;GO:0043410//positive regulation of MAPK cascade	GO:0017166//vinculin binding;GO:0005200//structural constituent of cytoskeleton;GO:0008134//transcription factor binding;GO:0005515//protein binding	K06086//PPAR signaling pathway;Insulin signaling pathway;Adherens junction
10175	0	0	0	1	16	12	0	0	29	0	0	0	CNIH1;cornichon family AMPA receptor auxiliary protein 1	GO:0005789//endoplasmic reticulum membrane;GO:0000139//Golgi membrane;GO:0016021//integral component of membrane	GO:0035556//intracellular signal transduction;GO:0007165//signal transduction;GO:0006955//immune response;GO:0016192//vesicle-mediated transport	-	-
101752399	0	0	0	13	17	0	0	0	0	0	29	0	STAG3L5P-PVRIG2P-PILRB;STAG3L5P-PVRIG2P-PILRB readthrough	-	-	-	K15411//Herpes simplex infection
10178	0	0	0	0	1	34	68	0	112	0	4	1	TENM1;teneurin transmembrane protein 1	GO:0005886//plasma membrane;GO:0005576//extracellular region;GO:0005794//Golgi apparatus;GO:0005783//endoplasmic reticulum;GO:0005737//cytoplasm;GO:0005856//cytoskeleton;GO:0016607//nuclear speck;GO:0005634//nucleus;GO:0048471//perinuclear region of cytoplasm;GO:0005887//integral component of plasma membrane;GO:0016363//nuclear matrix	GO:0030838//positive regulation of actin filament polymerization;GO:0051491//positive regulation of filopodium assembly;GO:0043406//positive regulation of MAP kinase activity;GO:0090316//positive regulation of intracellular protein transport;GO:0006351//transcription, DNA-templated;GO:0007218//neuropeptide signaling pathway;GO:0006955//immune response;GO:0006359//regulation of transcription from …	GO:0046982//protein heterodimerization activity;GO:0042803//protein homodimerization activity;GO:0008201//heparin binding	K06252//Focal adhesion;ECM-receptor interaction
10179	0	0	0	8	26	17	0	0	35	0	11	0	RBM7;RNA binding motif protein 7	GO:0005634//nucleus;GO:0005730//nucleolus	GO:0007126//meiotic nuclear division	GO:0000166//nucleotide binding;GO:0044822//poly(A) RNA binding	-
10180	0	33	0	11	52	16	60	0	48	0	0	0	RBM6;RNA binding motif protein 6	GO:0005634//nucleus	GO:0006396//RNA processing	GO:0003723//RNA binding;GO:0044822//poly(A) RNA binding;GO:0000166//nucleotide binding;GO:0003677//DNA binding	-
10181	0	25	45	11	10	8	54	0	30	0	0	0	RBM5;RNA binding motif protein 5	GO:0005634//nucleus;GO:0005654//nucleoplasm;GO:0005681//spliceosomal complex;GO:0005730//nucleolus	GO:0006396//RNA processing;GO:0000245//spliceosomal complex assembly;GO:0000398//mRNA splicing, via spliceosome;GO:0006915//apoptotic process;GO:0043065//positive regulation of apoptotic process;GO:0000381//regulation of alternative mRNA splicing, via spliceosome;GO:0010467//gene expression;GO:0008285//negative regulation of cell proliferation;GO:0008380//RNA splicing	GO:0003723//RNA binding;GO:0044822//poly(A) RNA binding;GO:0005515//protein binding;GO:0000166//nucleotide binding;GO:0003729//mRNA binding;GO:0008270//zinc ion binding;GO:0003677//DNA binding	-
10184	0	0	0	0	16	0	17	0	5	0	7	0	LHFPL2;lipoma HMGIC fusion partner-like 2	GO:0016021//integral component of membrane	-	-	-
10186	0	0	0	0	0	0	27	0	0	0	0	0	LHFP;lipoma HMGIC fusion partner	GO:0016021//integral component of membrane	-	GO:0003677//DNA binding	-
10188	54	24	0	16	59	20	35	1	6	0	59	0	TNK2;tyrosine kinase, non-receptor, 2	GO:0043025//neuronal cell body;GO:0005737//cytoplasm;GO:0030426//growth cone;GO:0005905//coated pit;GO:0005768//endosome;GO:0005886//plasma membrane;GO:0030425//dendrite;GO:0030659//cytoplasmic vesicle membrane;GO:0016020//membrane;GO:0030136//clathrin-coated vesicle;GO:0005634//nucleus;GO:0005912//adherens junction;GO:0030424//axon;GO:0070436//Grb2-EGFR complex	GO:0050731//positive regulation of peptidyl-tyrosine phosphorylation;GO:0007264//small GTPase mediated signal transduction;GO:0016310//phosphorylation;GO:0018108//peptidyl-tyrosine phosphorylation;GO:2000369//regulation of clathrin-mediated endocytosis;GO:0043086//negative regulation of catalytic activity;GO:0007166//cell surface receptor signaling pathway;GO:0006897//endocytosis	GO:0050699//WW domain binding;GO:0004713//protein tyrosine kinase activity;GO:0005154//epidermal growth factor receptor binding;GO:0005515//protein binding;GO:0046872//metal ion binding;GO:0005095//GTPase inhibitor activity;GO:0004674//protein serine/threonine kinase activity;GO:0004715//non-membrane spanning protein tyrosine kinase activity;GO:0005524//ATP binding;GO:0004712//protein serine/thre…	-
10189	0	0	0	0	0	0	0	62	10	0	0	0	ALYREF;Aly/REF export factor	GO:0035145//exon-exon junction complex;GO:0005829//cytosol;GO:0000346//transcription export complex;GO:0016607//nuclear speck;GO:0005654//nucleoplasm;GO:0070062//extracellular vesicular exosome;GO:0071013//catalytic step 2 spliceosome;GO:0016020//membrane	GO:0031124//mRNA 3'-end processing;GO:0032786//positive regulation of DNA-templated transcription, elongation;GO:0046784//viral mRNA export from host cell nucleus;GO:0006406//mRNA export from nucleus;GO:0031297//replication fork processing;GO:0001649//osteoblast differentiation;GO:0006369//termination of RNA polymerase II transcription;GO:0000018//regulation of DNA recombination;GO:0010467//gene …	GO:0044822//poly(A) RNA binding;GO:0000166//nucleotide binding;GO:0005515//protein binding;GO:0003697//single-stranded DNA binding	K12881//Spliceosome;Herpes simplex infection;RNA transport;mRNA surveillance pathway
1019	0	118	0	11	30	13	0	0	2	0	21	0	CDK4;cyclin-dependent kinase 4	GO:0005667//transcription factor complex;GO:0000785//chromatin;GO:0005634//nucleus;GO:0048471//perinuclear region of cytoplasm;GO:0005829//cytosol;GO:0005730//nucleolus;GO:0005923//tight junction;GO:0031965//nuclear membrane;GO:0005654//nucleoplasm;GO:0000307//cyclin-dependent protein kinase holoenzyme complex	GO:0051301//cell division;GO:0008284//positive regulation of cell proliferation;GO:0042493//response to drug;GO:0031100//organ regeneration;GO:0009636//response to toxic substance;GO:0045793//positive regulation of cell size;GO:0055093//response to hyperoxia;GO:0033574//response to testosterone;GO:0010288//response to lead ion;GO:0048146//positive regulation of fibroblast proliferation;GO:0071157…	GO:0005515//protein binding;GO:0030332//cyclin binding;GO:0004693//cyclin-dependent protein serine/threonine kinase activity;GO:0005524//ATP binding;GO:0032403//protein complex binding	K02089//Non-small cell lung cancer;T cell receptor signaling pathway;Chronic myeloid leukemia;Melanoma;Bladder cancer;Glioma;p53 signaling pathway;Measles;Cell cycle;Tight junction;Pathways in cancer;HTLV-I infection;Pancreatic cancer;Small cell lung cancer
10190	0	0	0	6	37	14	0	0	0	0	12	0	TXNDC9;thioredoxin domain containing 9	GO:0030496//midbody;GO:0005737//cytoplasm;GO:0005813//centrosome;GO:0005634//nucleus	GO:0045454//cell redox homeostasis	GO:0005515//protein binding	-
101926935	30	0	0	0	0	11	1	2	22	0	13	0	LOC101926935;uncharacterized LOC101926935	-	-	-	K00797//Glutathione metabolism;Arginine and proline metabolism;Ribosome;Cysteine and methionine metabolism;beta-Alanine metabolism;Metabolic pathways;K11447//Transcriptional misregulation in cancer;K00939//Metabolic pathways;Purine metabolism;Pyrimidine metabolism;Biosynthesis of secondary metabolites
101926943	1	721	341	562	1475	0	62	639	154	0	1604	3	LOC101926943;uncharacterized LOC101926943	-	-	-	K03121//Herpes simplex infection;Basal transcription factors
101926963	0	0	0	0	0	0	0	0	22	0	0	39	LOC101926963;uncharacterized LOC101926963	-	-	-	-
101926966	0	0	0	0	0	0	0	0	35	0	0	0	LOC101926966;uncharacterized LOC101926966	-	-	-	-
101926978	0	0	0	0	0	0	0	3	0	0	19	0	LINC01111;long intergenic non-protein coding RNA 1111	-	-	-	-
101927034	0	0	0	0	0	1	0	0	15	0	14	0	ROR1-AS1;ROR1 antisense RNA 1	-	-	-	K00939//Metabolic pathways;Pyrimidine metabolism;Biosynthesis of secondary metabolites;Purine metabolism;K06478//Fc gamma R-mediated phagocytosis;T cell receptor signaling pathway;Primary immunodeficiency;Cell adhesion molecules (CAMs);K00591//Ubiquinone and other terpenoid-quinone biosynthesis;Biosynthesis of secondary metabolites;Metabolic pathways;K01539//Aldosterone-regulated sodium reabsorpt…
101927151	0	0	0	0	6	0	0	0	0	0	0	0	LOC101927151;uncharacterized LOC101927151	-	-	-	-
101927233	0	1	0	17	16	0	0	0	0	0	6	0	CTB-118N6.3;uncharacterized LOC101927233	-	-	-	K06842//Axon guidance
101927267	1	10	307	17	16	37	36	474	70	1	12	275	LOC101927267;uncharacterized LOC101927267	-	-	-	K07607//Amyotrophic lateral sclerosis (ALS)
101927318	0	51	0	0	0	15	22	0	0	0	0	0	LOC101927318;uncharacterized LOC101927318	-	-	-	K09865//Vasopressin-regulated water reabsorption
101927322	0	262	6	236	438	0	26	904	206	4	313	0	LOC101927322;uncharacterized LOC101927322	-	-	-	-
101927374	0	0	0	0	0	0	0	0	29	0	0	1	LOC101927374;uncharacterized LOC101927374	-	-	-	K00543//Tryptophan metabolism;Metabolic pathways;K09299//Transcriptional misregulation in cancer;K04257//Olfactory transduction
101927423	0	47	0	0	18	0	0	86	0	0	23	0	PANO;proapoptotic nucleolar protein	-	-	-	K11447//Transcriptional misregulation in cancer;K00939//Pyrimidine metabolism;Biosynthesis of secondary metabolites;Purine metabolism;Metabolic pathways
101927431	0	0	0	0	0	27	0	0	9	0	6	0	LOC101927431;uncharacterized LOC101927431	-	-	-	-
101927492	0	33	44	51	98	0	0	0	21	295	132	0	LOC101927492;uncharacterized LOC101927492	-	-	-	-
101927550	172	0	0	117	111	0	6	163	0	1	273	1	LOC101927550;uncharacterized LOC101927550	-	-	-	K04678//Endocytosis;TGF-beta signaling pathway;Ubiquitin mediated proteolysis
101927572	76	0	0	0	0	15	0	0	9	0	33	0	LOC101927572;uncharacterized LOC101927572	-	-	-	-
101927583	65	0	0	0	0	36	3	0	19	0	0	0	LOC101927583;uncharacterized LOC101927583	-	-	-	-
101927746	0	0	0	0	0	0	0	0	1	0	0	0	LOC101927746;uncharacterized LOC101927746	-	-	-	-
101927770	0	0	0	0	0	8	0	0	31	0	0	0	LOC101927770;uncharacterized LOC101927770	-	-	-	K11447//Transcriptional misregulation in cancer;K00939//Purine metabolism;Pyrimidine metabolism;Biosynthesis of secondary metabolites;Metabolic pathways
101927844	13	0	0	0	0	0	0	0	7	0	0	0	LOC101927844;uncharacterized LOC101927844	-	-	-	K11447//Transcriptional misregulation in cancer;K01875//Arginine and proline metabolism;Biotin metabolism;Aminoacyl-tRNA biosynthesis;Metabolic pathways;K00591//Metabolic pathways;Biosynthesis of secondary metabolites;Ubiquinone and other terpenoid-quinone biosynthesis;K00939//Metabolic pathways;Purine metabolism;Biosynthesis of secondary metabolites;Pyrimidine metabolism
101927905	0	36	21	7	31	0	0	0	0	0	55	0	LOC101927905;uncharacterized LOC101927905	-	-	-	-
101927911	0	52	34	127	123	34	26	3	41	0	127	0	LOC101927911;uncharacterized LOC101927911	-	-	-	-
101927917	0	0	0	0	0	0	1	0	2	0	0	0	LOC101927917;uncharacterized LOC101927917	-	-	-	-
101927919	0	0	0	0	0	0	38	0	13	0	0	0	LOC101927919;uncharacterized LOC101927919	-	-	-	K00939//Metabolic pathways;Purine metabolism;Pyrimidine metabolism;Biosynthesis of secondary metabolites;K00591//Biosynthesis of secondary metabolites;Ubiquinone and other terpenoid-quinone biosynthesis;Metabolic pathways;K11447//Transcriptional misregulation in cancer
101927924	0	0	0	0	0	0	0	0	20	0	0	4	LOC101927924;uncharacterized LOC101927924	-	-	-	K00939//Purine metabolism;Biosynthesis of secondary metabolites;Pyrimidine metabolism;Metabolic pathways;K11447//Transcriptional misregulation in cancer
101927948	0	0	0	0	0	0	0	0	20	0	0	0	LOC101927948;uncharacterized LOC101927948	-	-	-	-
101927954	0	0	0	0	0	0	10	43	9	0	0	0	LOC101927954;uncharacterized LOC101927954	-	-	-	K00939//Biosynthesis of secondary metabolites;Pyrimidine metabolism;Purine metabolism;Metabolic pathways;K05722//Regulation of actin cytoskeleton
101928069	0	79	0	22	34	0	0	92	4	1	45	0	LOC101928069;uncharacterized LOC101928069	-	-	-	-
101928085	0	11	0	0	12	0	0	0	13	0	0	0	ERICH6-AS1;ERICH6 antisense RNA 1	-	-	-	-
101928147	0	22	0	9	33	0	0	0	23	0	5	0	C21orf140;chromosome 21 open reading frame 140	-	-	-	-
101928158	0	0	0	0	1	0	0	0	0	0	19	0	LAMA5-AS1;LAMA5 antisense RNA 1	-	-	-	K06240//Toxoplasmosis;Pathways in cancer;ECM-receptor interaction;Amoebiasis;Small cell lung cancer;Focal adhesion
101928336	0	0	0	0	0	0	0	0	0	0	11	0	LOC101928336;uncharacterized LOC101928336	-	-	-	K00591//Metabolic pathways;Biosynthesis of secondary metabolites;Ubiquinone and other terpenoid-quinone biosynthesis
101928340	0	0	0	0	0	0	0	0	12	0	0	0	LOC101928340;uncharacterized LOC101928340	-	-	-	K04257//Olfactory transduction
101928371	0	133	87	117	112	0	0	0	24	0	73	0	LOC101928371;uncharacterized LOC101928371	-	-	-	K08860//Epstein-Barr virus infection;Influenza A;Measles;Hepatitis C;Alzheimer's disease;Protein processing in endoplasmic reticulum;Herpes simplex infection
101928381	2	0	0	0	0	0	28	0	2	0	0	0	LOC101928381;uncharacterized LOC101928381	-	-	-	-
101928416	0	0	0	0	0	0	0	0	5	0	0	0	LOC101928416;uncharacterized LOC101928416	-	-	-	-
101928460	0	0	0	0	0	0	0	114	0	77	0	0	LOC101928460;uncharacterized LOC101928460	-	-	-	-
101928525	1	67	111	96	192	0	39	57	25	0	381	1	LOC101928525;uncharacterized LOC101928525	-	-	-	-
101928597	0	0	0	0	0	0	0	2	0	0	0	0	LOC101928597;uncharacterized LOC101928597	-	-	-	K00939//Metabolic pathways;Purine metabolism;Pyrimidine metabolism;Biosynthesis of secondary metabolites;K11447//Transcriptional misregulation in cancer
101928601	0	0	0	0	0	0	13	0	17	0	0	0	MEI4;meiosis-specific 4 homolog (S. cerevisiae)	GO:0000800//lateral element	GO:0042138//meiotic DNA double-strand break formation;GO:0007283//spermatogenesis;GO:0048477//oogenesis;GO:0007129//synapsis;GO:0006310//DNA recombination	-	-
101928603	0	0	0	0	13	0	0	0	7	0	0	0	C6orf229;chromosome 6 open reading frame 229	-	-	-	-
101928710	0	0	0	0	0	0	0	0	8	0	0	0	LOC101928710;uncharacterized LOC101928710	-	-	-	-
101928730	0	0	0	0	0	0	0	0	1	31	0	0	LOC101928730;uncharacterized LOC101928730	-	-	-	-
101928766	102	0	0	0	0	9	17	0	30	0	1	0	LOC101928766;uncharacterized LOC101928766	-	-	-	-
101928786	0	1	0	0	0	21	0	0	14	0	0	0	LOC101928786;uncharacterized LOC101928786	-	-	-	K12795//Plant-pathogen interaction;NOD-like receptor signaling pathway;K11447//Transcriptional misregulation in cancer;K00939//Metabolic pathways;Pyrimidine metabolism;Biosynthesis of secondary metabolites;Purine metabolism
101928796	0	0	0	0	0	0	0	0	21	0	0	0	LOC101928796;uncharacterized LOC101928796	-	-	-	K06238//Protein digestion and absorption;Focal adhesion;ECM-receptor interaction
101928936	0	0	0	0	0	28	0	0	38	0	0	0	LOC101928936;uncharacterized LOC101928936	-	-	-	-
101928999	0	0	1	10	0	3	0	58	31	1	0	574	IQCF5-AS1;IQCF5 antisense RNA 1	-	-	-	-
101929106	35	0	0	0	0	0	0	0	8	1	8	0	LOC101929106;uncharacterized LOC101929106	-	-	-	-
101929215	0	42	0	35	18	0	68	6	19	0	15	0	CTD-2201I18.1;uncharacterized LOC101929215	-	-	-	K04659//ECM-receptor interaction;Phagosome;Malaria;TGF-beta signaling pathway;Focal adhesion;Bladder cancer;p53 signaling pathway
101929231	0	530	264	727	606	2	48	373	85	1	478	504	LOC101929231;uncharacterized LOC101929231	-	-	-	-
101929268	0	0	0	0	0	11	0	0	0	111	0	0	LOC101929268;uncharacterized LOC101929268	-	-	-	-
101929372	0	114	50	60	116	35	27	83	23	0	132	0	LOC101929372;uncharacterized LOC101929372	-	-	-	K00939//Metabolic pathways;Biosynthesis of secondary metabolites;Pyrimidine metabolism;Purine metabolism
101929387	13	36	0	24	0	15	22	1	0	0	45	0	LMF1-AS1;LMF1 antisense RNA 1	-	-	-	-
101929390	0	0	24	0	0	0	2	4	0	0	0	0	LINC01247;long intergenic non-protein coding RNA 1247	-	-	-	K11447//Transcriptional misregulation in cancer;K06264//ECM-receptor interaction;K00591//Metabolic pathways;Biosynthesis of secondary metabolites;Ubiquinone and other terpenoid-quinone biosynthesis;K00939//Metabolic pathways;Purine metabolism;Pyrimidine metabolism;Biosynthesis of secondary metabolites
101929439	0	1	0	12	26	15	17	7	6	0	27	560	LOC101929439;uncharacterized LOC101929439	-	-	-	-
101929532	0	4	0	19	0	1	0	0	4	285	2	0	LOC101929532;uncharacterized LOC101929532	-	-	-	-
101929567	0	0	0	0	0	6	42	84	29	0	16	0	LOC101929567;uncharacterized LOC101929567	-	-	-	K00939//Purine metabolism;Pyrimidine metabolism;Biosynthesis of secondary metabolites;Metabolic pathways;K11447//Transcriptional misregulation in cancer
101929680	0	0	0	0	0	0	0	0	0	0	19	0	LOC101929680;uncharacterized LOC101929680	-	-	-	-
101929780	0	0	0	0	0	0	0	0	11	0	6	0	NBPF25P;neuroblastoma breakpoint family, member 25, pseudogene	-	-	-	-
10193	0	45	1	8	134	0	0	44	49	0	0	33	RNF41;ring finger protein 41, E3 ubiquitin protein ligase	GO:0005829//cytosol	GO:0045619//regulation of lymphocyte differentiation;GO:0051865//protein autoubiquitination;GO:2000377//regulation of reactive oxygen species metabolic process;GO:0043408//regulation of MAPK cascade;GO:2000379//positive regulation of reactive oxygen species metabolic process;GO:0030336//negative regulation of cell migration;GO:0010498//proteasomal protein catabolic process;GO:0097191//extrinsic a…	GO:0016881//acid-amino acid ligase activity;GO:0005135//interleukin-3 receptor binding;GO:0008270//zinc ion binding;GO:0031386//protein tag;GO:0005515//protein binding;GO:0004842//ubiquitin-protein transferase activity;GO:0005128//erythropoietin receptor binding	K11981//Endocytosis
10194	0	1	0	1	49	0	0	0	27	0	1	0	TSHZ1;teashirt zinc finger homeobox 1	GO:0005634//nucleus	GO:0060023//soft palate development;GO:0006355//regulation of transcription, DNA-templated;GO:0009952//anterior/posterior pattern specification;GO:0042474//middle ear morphogenesis;GO:0006351//transcription, DNA-templated	GO:0003677//DNA binding;GO:0046872//metal ion binding	-
10195	1	0	1	0	0	0	0	0	18	0	0	0	ALG3;ALG3, alpha-1,3- mannosyltransferase	GO:0016021//integral component of membrane;GO:0005789//endoplasmic reticulum membrane	GO:0097502//mannosylation;GO:0044267//cellular protein metabolic process;GO:0018279//protein N-linked glycosylation via asparagine;GO:0006488//dolichol-linked oligosaccharide biosynthetic process;GO:0043687//post-translational protein modification;GO:0006486//protein glycosylation	GO:0052925//dol-P-Man:Man(5)GlcNAc(2)-PP-Dol alpha-1,3-mannosyltransferase activity;GO:0000033//alpha-1,3-mannosyltransferase activity	K03845//N-Glycan biosynthesis;Metabolic pathways;Various types of N-glycan biosynthesis
10196	40	0	0	9	1	11	0	0	1	0	6	223	PRMT3;protein arginine methyltransferase 3	GO:0005737//cytoplasm;GO:0005829//cytosol;GO:0005840//ribosome	GO:0019919//peptidyl-arginine methylation, to asymmetrical-dimethyl arginine;GO:0034969//histone arginine methylation;GO:0031397//negative regulation of protein ubiquitination;GO:0006355//regulation of transcription, DNA-templated	GO:0016274//protein-arginine N-methyltransferase activity;GO:0005515//protein binding;GO:0046872//metal ion binding;GO:0008469//histone-arginine N-methyltransferase activity;GO:0035242//protein-arginine omega-N asymmetric methyltransferase activity;GO:0072341//modified amino acid binding;GO:0008168//methyltransferase activity	-
10197	0	22	0	32	83	15	15	0	41	134	0	236	PSME3;proteasome (prosome, macropain) activator subunit 3 (PA28 gamma; Ki)	GO:0005730//nucleolus;GO:0005829//cytosol;GO:0005634//nucleus;GO:0008537//proteasome activator complex;GO:0016020//membrane;GO:0005737//cytoplasm;GO:0000502//proteasome complex;GO:0005654//nucleoplasm	GO:0051439//regulation of ubiquitin-protein ligase activity involved in mitotic cell cycle;GO:0006977//DNA damage response, signal transduction by p53 class mediator resulting in cell cycle arrest;GO:0002479//antigen processing and presentation of exogenous peptide antigen via MHC class I, TAP-dependent;GO:0051436//negative regulation of ubiquitin-protein ligase activity involved in mitotic cell …	GO:0005515//protein binding;GO:0002039//p53 binding;GO:0097371//MDM2/MDM4 family protein binding;GO:0061133//endopeptidase activator activity	K06698//Hepatitis C;Antigen processing and presentation;Proteasome
10198	0	0	0	24	39	0	0	0	98	0	16	0	MPHOSPH9;M-phase phosphoprotein 9	GO:0005794//Golgi apparatus;GO:0005886//plasma membrane;GO:0005814//centriole;GO:0000139//Golgi membrane;GO:0016020//membrane;GO:0005813//centrosome;GO:0005737//cytoplasm	-	-	K10352//Tight junction;Salmonella infection;Dilated cardiomyopathy;Cardiac muscle contraction;Viral myocarditis;Hypertrophic cardiomyopathy (HCM);Regulation of actin cytoskeleton;Vascular smooth muscle contraction;K12478//Phagosome;Endocytosis;Tuberculosis
10199	0	65	1	17	60	14	9	0	13	0	24	0	MPHOSPH10;M-phase phosphoprotein 10 (U3 small nucleolar ribonucleoprotein)	GO:0005732//small nucleolar ribonucleoprotein complex;GO:0005694//chromosome;GO:0005730//nucleolus	GO:0000375//RNA splicing, via transesterification reactions;GO:0010923//negative regulation of phosphatase activity;GO:0006396//RNA processing;GO:0006364//rRNA processing;GO:0008380//RNA splicing	GO:0044822//poly(A) RNA binding;GO:0005515//protein binding	K14559//Ribosome biogenesis in eukaryotes
102	0	0	0	10	22	33	0	0	22	0	11	0	ADAM10;ADAM metallopeptidase domain 10	GO:0014069//postsynaptic density;GO:0005737//cytoplasm;GO:0009986//cell surface;GO:0016021//integral component of membrane;GO:0016020//membrane;GO:0097197//tetraspanin-enriched microdomain;GO:0005886//plasma membrane;GO:0070062//extracellular vesicular exosome;GO:0005794//Golgi apparatus;GO:0005798//Golgi-associated vesicle;GO:0097038//perinuclear endoplasmic reticulum;GO:0005634//nucleus;GO:0005…	GO:0030307//positive regulation of cell growth;GO:0006509//membrane protein ectodomain proteolysis;GO:0030335//positive regulation of cell migration;GO:0007220//Notch receptor processing;GO:0001701//in utero embryonic development;GO:0008284//positive regulation of cell proliferation;GO:0008219//cell death;GO:0042117//monocyte activation;GO:0030198//extracellular matrix organization;GO:0007267//ce…	GO:0008270//zinc ion binding;GO:0008237//metallopeptidase activity;GO:0042803//protein homodimerization activity;GO:0005515//protein binding;GO:0005178//integrin binding;GO:0004175//endopeptidase activity;GO:0005102//receptor binding;GO:0017124//SH3 domain binding;GO:0019901//protein kinase binding;GO:0004222//metalloendopeptidase activity	K06704//Alzheimer's disease;Epithelial cell signaling in Helicobacter pylori infection
1020	0	0	0	0	2	0	20	0	27	79	1	11	CDK5;cyclin-dependent kinase 5	GO:0030425//dendrite;GO:0030175//filopodium;GO:0031594//neuromuscular junction;GO:0016020//membrane;GO:0030426//growth cone;GO:0005737//cytoplasm;GO:0014069//postsynaptic density;GO:0043204//perikaryon;GO:0030424//axon;GO:0005634//nucleus;GO:0030054//cell junction;GO:0045211//postsynaptic membrane;GO:0016533//cyclin-dependent protein kinase 5 holoenzyme complex;GO:0043025//neuronal cell body;GO:0…	GO:0031175//neuron projection development;GO:0030517//negative regulation of axon extension;GO:0001963//synaptic transmission, dopaminergic;GO:0032801//receptor catabolic process;GO:0070509//calcium ion import;GO:0090314//positive regulation of protein targeting to membrane;GO:0022038//corpus callosum development;GO:0007411//axon guidance;GO:0045055//regulated secretory pathway;GO:0051402//neuron…	GO:0004672//protein kinase activity;GO:0050321//tau-protein kinase activity;GO:0002039//p53 binding;GO:0043125//ErbB-3 class receptor binding;GO:0016301//kinase activity;GO:0005524//ATP binding;GO:0046875//ephrin receptor binding;GO:0005515//protein binding;GO:0004674//protein serine/threonine kinase activity;GO:0005176//ErbB-2 class receptor binding;GO:0030549//acetylcholine receptor activator a…	K02090//Alzheimer's disease;Axon guidance;Cocaine addiction
10200	0	0	0	0	9	0	0	0	15	0	0	0	MPHOSPH6;M-phase phosphoprotein 6	GO:0005730//nucleolus;GO:0005737//cytoplasm;GO:0000178//exosome (RNase complex);GO:0005634//nucleus;GO:0000176//nuclear exosome (RNase complex)	GO:0000460//maturation of 5.8S rRNA	GO:0005515//protein binding;GO:0003723//RNA binding	K12593//RNA degradation
10201	0	15	0	7	25	0	17	0	13	0	0	0	NME6;NME/NM23 nucleoside diphosphate kinase 6	GO:0005739//mitochondrion	GO:0006241//CTP biosynthetic process;GO:0045839//negative regulation of mitosis;GO:0006183//GTP biosynthetic process;GO:0030308//negative regulation of cell growth;GO:0006165//nucleoside diphosphate phosphorylation;GO:0006915//apoptotic process;GO:0006228//UTP biosynthetic process	GO:0005524//ATP binding;GO:0004550//nucleoside diphosphate kinase activity;GO:0046872//metal ion binding	K00940//Metabolic pathways;Bacterial invasion of epithelial cells;Pyrimidine metabolism;Nitrogen metabolism;Biosynthesis of secondary metabolites;Purine metabolism;Shigellosis
10202	0	0	0	0	0	8	31	34	0	108	4	0	DHRS2;dehydrogenase/reductase (SDR family) member 2	GO:0005634//nucleus;GO:0005635//nuclear envelope;GO:0005737//cytoplasm;GO:0005759//mitochondrial matrix;GO:0070062//extracellular vesicular exosome;GO:0005739//mitochondrion	GO:0034599//cellular response to oxidative stress;GO:0008207//C21-steroid hormone metabolic process;GO:0055114//oxidation-reduction process;GO:0008285//negative regulation of cell proliferation;GO:0043066//negative regulation of apoptotic process;GO:0009636//response to toxic substance;GO:0043011//myeloid dendritic cell differentiation	GO:0004090//carbonyl reductase (NADPH) activity	-
10203	0	0	0	0	0	6	0	0	38	0	8	544	CALCRL;calcitonin receptor-like	GO:0005887//integral component of plasma membrane;GO:0005764//lysosome;GO:0005783//endoplasmic reticulum;GO:0005886//plasma membrane;GO:0005768//endosome	GO:0048661//positive regulation of smooth muscle cell proliferation;GO:0007507//heart development;GO:0001525//angiogenesis;GO:0071329//cellular response to sucrose stimulus;GO:0006171//cAMP biosynthetic process;GO:0031623//receptor internalization;GO:0006937//regulation of muscle contraction;GO:0007187//G-protein coupled receptor signaling pathway, coupled to cyclic nucleotide second messenger;GO…	GO:0001635//calcitonin gene-related peptide receptor activity;GO:0001605//adrenomedullin receptor activity;GO:0005515//protein binding;GO:0008565//protein transporter activity;GO:0004948//calcitonin receptor activity;GO:0004930//G-protein coupled receptor activity	K04577//Vascular smooth muscle contraction;Neuroactive ligand-receptor interaction
10204	0	0	0	3	6	0	0	0	0	0	0	0	NUTF2;nuclear transport factor 2	GO:0070062//extracellular vesicular exosome;GO:0005829//cytosol;GO:0005643//nuclear pore	GO:0006611//protein export from nucleus	GO:0005215//transporter activity;GO:0005515//protein binding	K14285//Ribosome biogenesis in eukaryotes;Influenza A;mRNA surveillance pathway;RNA transport
10205	0	43	0	5	0	0	29	0	20	0	0	0	MPZL2;myelin protein zero-like 2	GO:0016021//integral component of membrane;GO:0005886//plasma membrane;GO:0005856//cytoskeleton	GO:0009653//anatomical structure morphogenesis;GO:0033077//T cell differentiation in thymus;GO:0007156//homophilic cell adhesion via plasma membrane adhesion molecules;GO:0016337//single organismal cell-cell adhesion	GO:0005515//protein binding	K06770//Cell adhesion molecules (CAMs)
10206	0	87	26	14	29	0	13	0	71	0	42	292	TRIM13;tripartite motif containing 13	GO:0016021//integral component of membrane;GO:0005737//cytoplasm;GO:0005789//endoplasmic reticulum membrane;GO:0097038//perinuclear endoplasmic reticulum	GO:0016239//positive regulation of macroautophagy;GO:0045087//innate immune response;GO:0051865//protein autoubiquitination;GO:0030433//ER-associated ubiquitin-dependent protein catabolic process;GO:0043123//positive regulation of I-kappaB kinase/NF-kappaB signaling;GO:0051092//positive regulation of NF-kappaB transcription factor activity;GO:0007165//signal transduction;GO:0043161//proteasome-me…	GO:0016874//ligase activity;GO:0005515//protein binding;GO:0004842//ubiquitin-protein transferase activity;GO:0008270//zinc ion binding;GO:0004871//signal transducer activity	-
10207	66	189	2	69	299	47	90	40	190	225	3	0	INADL;InaD-like (Drosophila)	GO:0016324//apical plasma membrane;GO:0048471//perinuclear region of cytoplasm;GO:0043234//protein complex;GO:0070062//extracellular vesicular exosome;GO:0005886//plasma membrane;GO:0005923//tight junction	GO:0035556//intracellular signal transduction;GO:0070830//tight junction assembly;GO:0034329//cell junction assembly;GO:0045216//cell-cell junction organization	GO:0005515//protein binding	K06092//Tight junction
10208	0	1	0	10	0	43	11	0	30	0	0	0	USPL1;ubiquitin specific peptidase like 1	GO:0005615//extracellular space;GO:0015030//Cajal body	GO:0008283//cell proliferation;GO:0016926//protein desumoylation;GO:0006508//proteolysis;GO:0030576//Cajal body organization	GO:0005515//protein binding;GO:0032183//SUMO binding;GO:0070140//SUMO-specific isopeptidase activity;GO:0043130//ubiquitin binding	-
10209	0	216	0	67	105	0	0	1	17	0	0	0	EIF1;eukaryotic translation initiation factor 1	GO:0005737//cytoplasm	GO:0006413//translational initiation;GO:0009048//dosage compensation by inactivation of X chromosome;GO:0006446//regulation of translational initiation;GO:0006950//response to stress	GO:0008135//translation factor activity, nucleic acid binding;GO:0044822//poly(A) RNA binding;GO:0003743//translation initiation factor activity	K03113//RNA transport
1021	34	2	0	12	87	0	21	0	24	0	1	0	CDK6;cyclin-dependent kinase 6	GO:0005730//nucleolus;GO:0001726//ruffle;GO:0005829//cytosol;GO:0005634//nucleus;GO:0000307//cyclin-dependent protein kinase holoenzyme complex;GO:0005737//cytoplasm	GO:0050680//negative regulation of epithelial cell proliferation;GO:0021670//lateral ventricle development;GO:0007050//cell cycle arrest;GO:0014002//astrocyte development;GO:2000145//regulation of cell motility;GO:0007219//Notch signaling pathway;GO:0060218//hematopoietic stem cell differentiation;GO:0045786//negative regulation of cell cycle;GO:0043697//cell dedifferentiation;GO:0021542//dentate…	GO:0004693//cyclin-dependent protein serine/threonine kinase activity;GO:0005524//ATP binding;GO:0030332//cyclin binding;GO:0005515//protein binding	K02091//Small cell lung cancer;Pathways in cancer;Pancreatic cancer;Measles;p53 signaling pathway;Glioma;Cell cycle;Non-small cell lung cancer;Melanoma;Chronic myeloid leukemia
10210	0	34	61	52	180	0	4	0	0	0	39	0	TOPORS;topoisomerase I binding, arginine/serine-rich, E3 ubiquitin protein ligase	GO:0016605//PML body;GO:0030496//midbody;GO:0016607//nuclear speck;GO:0005814//centriole;GO:0005634//nucleus;GO:0032391//photoreceptor connecting cilium;GO:0000922//spindle pole;GO:0005868//cytoplasmic dynein complex;GO:0036064//ciliary basal body;GO:0000930//gamma-tubulin complex;GO:0000151//ubiquitin ligase complex	GO:0042127//regulation of cell proliferation;GO:0006974//cellular response to DNA damage stimulus;GO:0051457//maintenance of protein location in nucleus;GO:0046548//retinal rod cell development;GO:0035845//photoreceptor cell outer segment organization;GO:0010842//retina layer formation;GO:0016925//protein sumoylation;GO:0034504//protein localization to nucleus;GO:0046549//retinal cone cell develo…	GO:0044547//DNA topoisomerase binding;GO:0019789//SUMO ligase activity;GO:0008270//zinc ion binding;GO:0003823//antigen binding;GO:0003677//DNA binding;GO:0004842//ubiquitin-protein transferase activity;GO:0005515//protein binding	-
10212	0	0	0	0	0	0	0	0	28	0	0	0	DDX39A;DEAD (Asp-Glu-Ala-Asp) box polypeptide 39A	GO:0016020//membrane;GO:0005737//cytoplasm;GO:0005634//nucleus	GO:0006406//mRNA export from nucleus;GO:0000398//mRNA splicing, via spliceosome	GO:0044822//poly(A) RNA binding;GO:0005515//protein binding;GO:0004386//helicase activity;GO:0005524//ATP binding	-
10213	0	0	0	3	0	0	0	0	2	0	8	0	PSMD14;proteasome (prosome, macropain) 26S subunit, non-ATPase, 14	GO:0005829//cytosol;GO:0070062//extracellular vesicular exosome;GO:0022624//proteasome accessory complex;GO:0000502//proteasome complex;GO:0005654//nucleoplasm;GO:0005634//nucleus;GO:0008541//proteasome regulatory particle, lid subcomplex	GO:0016071//mRNA metabolic process;GO:0016070//RNA metabolic process;GO:0042981//regulation of apoptotic process;GO:0000082//G1/S transition of mitotic cell cycle;GO:0016032//viral process;GO:0051437//positive regulation of ubiquitin-protein ligase activity involved in mitotic cell cycle;GO:0031145//anaphase-promoting complex-dependent proteasomal ubiquitin-dependent protein catabolic process;GO:…	GO:0061133//endopeptidase activator activity;GO:0004221//ubiquitin thiolesterase activity;GO:0070628//proteasome binding;GO:0008237//metallopeptidase activity;GO:0046872//metal ion binding	K03030//Proteasome;Epstein-Barr virus infection
10215	0	0	0	0	0	0	0	0	31	0	8	0	OLIG2;oligodendrocyte lineage transcription factor 2	GO:0005737//cytoplasm;GO:0005634//nucleus	GO:0042552//myelination;GO:0006366//transcription from RNA polymerase II promoter;GO:0021522//spinal cord motor neuron differentiation;GO:0045665//negative regulation of neuron differentiation;GO:0000122//negative regulation of transcription from RNA polymerase II promoter;GO:0021794//thalamus development;GO:0021530//spinal cord oligodendrocyte cell fate specification;GO:0048663//neuron fate comm…	GO:0042803//protein homodimerization activity;GO:0071837//HMG box domain binding;GO:0003677//DNA binding;GO:0003705//RNA polymerase II distal enhancer sequence-specific DNA binding transcription factor activity	-
102157402	0	0	0	0	51	0	0	0	11	0	0	0	AK6;adenylate kinase 6	GO:0005654//nucleoplasm;GO:0015030//Cajal body;GO:0016020//membrane;GO:0005730//nucleolus	GO:0006200//ATP catabolic process;GO:0046939//nucleotide phosphorylation	GO:0005524//ATP binding;GO:0016887//ATPase activity;GO:0004017//adenylate kinase activity;GO:0005515//protein binding	K14535//Basal transcription factors;Ribosome biogenesis in eukaryotes
10216	0	115	42	44	18	0	28	0	21	1	40	0	PRG4;proteoglycan 4	GO:0005615//extracellular space	GO:0045409//negative regulation of interleukin-6 biosynthetic process;GO:0042127//regulation of cell proliferation;GO:0006898//receptor-mediated endocytosis;GO:0006955//immune response;GO:0071425//hematopoietic stem cell proliferation;GO:0008283//cell proliferation	GO:0030247//polysaccharide binding;GO:0005044//scavenger receptor activity	K06251//Focal adhesion;ECM-receptor interaction
10217	1	15	2	27	46	8	0	0	77	1	3	695	CTDSPL;CTD (carboxy-terminal domain, RNA polymerase II, polypeptide A) small phosphatase-like	GO:0005634//nucleus;GO:0070062//extracellular vesicular exosome	GO:0016311//dephosphorylation	GO:0046872//metal ion binding;GO:0004721//phosphoprotein phosphatase activity	-
10218	0	0	0	0	0	0	50	0	39	0	0	0	ANGPTL7;angiopoietin-like 7	GO:0005576//extracellular region	GO:0006979//response to oxidative stress	-	-
1022	0	0	0	20	34	0	0	0	22	0	0	0	CDK7;cyclin-dependent kinase 7	GO:0005739//mitochondrion;GO:0048471//perinuclear region of cytoplasm;GO:0005675//holo TFIIH complex;GO:0005634//nucleus;GO:0005737//cytoplasm;GO:0005654//nucleoplasm	GO:0000718//nucleotide-excision repair, DNA damage removal;GO:0000079//regulation of cyclin-dependent protein serine/threonine kinase activity;GO:0006289//nucleotide-excision repair;GO:0006366//transcription from RNA polymerase II promoter;GO:0006468//protein phosphorylation;GO:0006283//transcription-coupled nucleotide-excision repair;GO:0000086//G2/M transition of mitotic cell cycle;GO:0000278//…	GO:0004672//protein kinase activity;GO:0050681//androgen receptor binding;GO:0005524//ATP binding;GO:0003713//transcription coactivator activity;GO:0005515//protein binding;GO:0004693//cyclin-dependent protein serine/threonine kinase activity;GO:0008353//RNA polymerase II carboxy-terminal domain kinase activity;GO:0008022//protein C-terminus binding;GO:0008094//DNA-dependent ATPase activity	K02202//Nucleotide excision repair;Basal transcription factors;Cell cycle
10220	0	122	41	34	96	14	0	0	17	0	78	1	GDF11;growth differentiation factor 11	GO:0005615//extracellular space	GO:0001501//skeletal system development;GO:0045596//negative regulation of cell differentiation;GO:0007498//mesoderm development;GO:0040007//growth;GO:0021512//spinal cord anterior/posterior patterning;GO:0060021//palate development;GO:0031016//pancreas development;GO:0048593//camera-type eye morphogenesis;GO:0007399//nervous system development;GO:0008285//negative regulation of cell proliferatio…	GO:0005125//cytokine activity;GO:0008083//growth factor activity	-
10221	0	0	0	1	7	0	0	0	9	0	0	0	TRIB1;tribbles pseudokinase 1	GO:0005737//cytoplasm;GO:0005634//nucleus	GO:0043433//negative regulation of sequence-specific DNA binding transcription factor activity;GO:0043405//regulation of MAP kinase activity;GO:0031665//negative regulation of lipopolysaccharide-mediated signaling pathway;GO:0007254//JNK cascade;GO:0032436//positive regulation of proteasomal ubiquitin-dependent protein catabolic process;GO:0006469//negative regulation of protein kinase activity;G…	GO:0004860//protein kinase inhibitor activity;GO:0055106//ubiquitin-protein transferase regulator activity;GO:0031625//ubiquitin protein ligase binding;GO:0031434//mitogen-activated protein kinase kinase binding;GO:0004672//protein kinase activity;GO:0008134//transcription factor binding;GO:0005524//ATP binding	-
10223	0	0	0	0	0	0	29	0	11	0	6	566	GPA33;glycoprotein A33 (transmembrane)	GO:0070062//extracellular vesicular exosome;GO:0005887//integral component of plasma membrane	-	GO:0004872//receptor activity	-
102238594	11	0	0	0	0	12	0	0	12	0	0	0	SPACA6P-AS;SPACA6P antisense RNA	-	-	-	K00939//Metabolic pathways;Pyrimidine metabolism;Biosynthesis of secondary metabolites;Purine metabolism;K06264//ECM-receptor interaction;K11447//Transcriptional misregulation in cancer
10224	69	0	0	0	0	0	13	0	19	0	13	0	ZNF443;zinc finger protein 443	GO:0005634//nucleus	GO:0006915//apoptotic process;GO:0006351//transcription, DNA-templated;GO:0006355//regulation of transcription, DNA-templated;GO:0006950//response to stress	GO:0003677//DNA binding;GO:0046872//metal ion binding	-
10225	0	0	0	0	6	2	0	0	64	0	0	0	CD96;CD96 molecule	GO:0005887//integral component of plasma membrane;GO:0005886//plasma membrane	GO:0007155//cell adhesion;GO:0050776//regulation of immune response;GO:0006955//immune response	-	-
10226	224	1	0	24	57	24	2	0	13	0	0	0	PLIN3;perilipin 3	GO:0005737//cytoplasm;GO:0005768//endosome;GO:0005794//Golgi apparatus;GO:0043231//intracellular membrane-bounded organelle;GO:0010008//endosome membrane;GO:0005811//lipid particle;GO:0016020//membrane	GO:0016192//vesicle-mediated transport	GO:0005515//protein binding	K08768//PPAR signaling pathway
10227	0	0	0	0	0	0	0	71	0	0	0	0	MFSD10;major facilitator superfamily domain containing 10	GO:0016021//integral component of membrane	GO:0006915//apoptotic process;GO:0006810//transport;GO:0015904//tetracycline transport;GO:0055085//transmembrane transport	GO:0008493//tetracycline transporter activity	-
10228	0	36	0	31	81	0	0	100	13	0	5	0	STX6;syntaxin 6	GO:0005794//Golgi apparatus;GO:0005769//early endosome;GO:0031201//SNARE complex;GO:0005886//plasma membrane;GO:0000139//Golgi membrane;GO:0030136//clathrin-coated vesicle;GO:0016021//integral component of membrane;GO:0048471//perinuclear region of cytoplasm;GO:0032588//trans-Golgi network membrane	GO:0048193//Golgi vesicle transport;GO:0007032//endosome organization;GO:0042147//retrograde transport, endosome to Golgi;GO:0006886//intracellular protein transport;GO:0006906//vesicle fusion	GO:0005484//SNAP receptor activity;GO:0005515//protein binding	K08498//SNARE interactions in vesicular transport
10229	0	55	0	16	119	0	0	0	0	0	8	0	COQ7;coenzyme Q7 homolog, ubiquinone (yeast)	GO:0005634//nucleus;GO:0005743//mitochondrial inner membrane	GO:0034599//cellular response to oxidative stress;GO:0022008//neurogenesis;GO:0001701//in utero embryonic development;GO:0070584//mitochondrion morphogenesis;GO:0044281//small molecule metabolic process;GO:0001306//age-dependent response to oxidative stress;GO:0006744//ubiquinone biosynthetic process;GO:0042775//mitochondrial ATP synthesis coupled electron transport;GO:0008340//determination of a…	GO:0046872//metal ion binding	K06134//Biosynthesis of secondary metabolites;Ubiquinone and other terpenoid-quinone biosynthesis;Metabolic pathways
10231	0	0	0	10	19	9	2	0	54	24	0	0	RCAN2;regulator of calcineurin 2	-	GO:0031987//locomotion involved in locomotory behavior;GO:0007614//short-term memory;GO:0033173//calcineurin-NFAT signaling cascade;GO:0006979//response to oxidative stress	GO:0000166//nucleotide binding	-
10232	0	0	0	0	0	0	0	39	11	155	11	0	MSLN;mesothelin	GO:0031225//anchored component of membrane;GO:0005886//plasma membrane;GO:0005794//Golgi apparatus;GO:0016020//membrane;GO:0009986//cell surface;GO:0005615//extracellular space	GO:0007155//cell adhesion;GO:0031016//pancreas development	GO:0005515//protein binding	-
10233	0	0	0	6	0	0	0	0	2	0	9	0	LRRC23;leucine rich repeat containing 23	-	-	-	K11092//Spliceosome;K10159//Chagas disease (American trypanosomiasis);Malaria;Rheumatoid arthritis;Phagosome;Legionellosis;Tuberculosis;Toll-like receptor signaling pathway;Herpes simplex infection;Leishmaniasis;Toxoplasmosis;Measles;Amoebiasis;K10411//Huntington's disease
10234	0	0	0	0	0	17	0	108	25	0	0	0	LRRC17;leucine rich repeat containing 17	GO:0005615//extracellular space	GO:0033687//osteoblast proliferation;GO:0001649//osteoblast differentiation;GO:0045671//negative regulation of osteoclast differentiation;GO:0048539//bone marrow development	-	K06839//Axon guidance
10235	0	0	0	0	0	2	11	50	31	0	2	0	RASGRP2;RAS guanyl releasing protein 2 (calcium and DAG-regulated)	GO:0005886//plasma membrane;GO:0030054//cell junction;GO:0045202//synapse;GO:0043005//neuron projection;GO:0005829//cytosol;GO:0032587//ruffle membrane	GO:0007165//signal transduction;GO:0043547//positive regulation of GTPase activity;GO:0030168//platelet activation;GO:0007265//Ras protein signal transduction;GO:0001558//regulation of cell growth;GO:0051056//regulation of small GTPase mediated signal transduction;GO:0007596//blood coagulation	GO:0005509//calcium ion binding;GO:0008289//lipid binding;GO:0019992//diacylglycerol binding;GO:0005085//guanyl-nucleotide exchange factor activity	K12361//MAPK signaling pathway;Chemokine signaling pathway;K00688//Starch and sucrose metabolism;Insulin signaling pathway
10236	0	17	2	59	361	0	15	0	19	0	0	0	HNRNPR;heterogeneous nuclear ribonucleoprotein R	GO:0005654//nucleoplasm;GO:0005737//cytoplasm;GO:0005634//nucleus;GO:0030529//ribonucleoprotein complex;GO:0071013//catalytic step 2 spliceosome;GO:0005730//nucleolus;GO:0005681//spliceosomal complex	GO:0006397//mRNA processing;GO:0008380//RNA splicing;GO:0010467//gene expression;GO:0000398//mRNA splicing, via spliceosome	GO:0003723//RNA binding;GO:0000166//nucleotide binding;GO:0044822//poly(A) RNA binding;GO:0005515//protein binding	-
10237	14	0	0	0	12	0	0	0	19	0	0	0	SLC35B1;solute carrier family 35, member B1	GO:0016021//integral component of membrane;GO:0043231//intracellular membrane-bounded organelle;GO:0005789//endoplasmic reticulum membrane	GO:0006810//transport;GO:0072334//UDP-galactose transmembrane transport	GO:0005459//UDP-galactose transmembrane transporter activity	-
10238	81	136	20	54	237	16	71	0	21	0	0	19	DCAF7;DDB1 and CUL4 associated factor 7	GO:0005730//nucleolus;GO:0080008//Cul4-RING E3 ubiquitin ligase complex;GO:0005737//cytoplasm;GO:0005634//nucleus;GO:0016363//nuclear matrix;GO:0043234//protein complex	GO:0016567//protein ubiquitination;GO:0007275//multicellular organismal development	GO:0005515//protein binding	-
10239	0	1	63	7	40	0	0	0	0	0	0	0	AP3S2;adaptor-related protein complex 3, sigma 2 subunit	GO:0030123//AP-3 adaptor complex;GO:0005794//Golgi apparatus;GO:0030659//cytoplasmic vesicle membrane	GO:0006886//intracellular protein transport;GO:0048490//anterograde synaptic vesicle transport;GO:0008089//anterograde axon cargo transport	GO:0008565//protein transporter activity	K12399//Lysosome
1024	0	0	0	22	22	0	39	0	47	0	0	0	CDK8;cyclin-dependent kinase 8	GO:0005654//nucleoplasm;GO:0005634//nucleus;GO:0016592//mediator complex	GO:0045944//positive regulation of transcription from RNA polymerase II promoter;GO:0007179//transforming growth factor beta receptor signaling pathway;GO:0007219//Notch signaling pathway;GO:0006367//transcription initiation from RNA polymerase II promoter;GO:0006351//transcription, DNA-templated;GO:0010467//gene expression;GO:0006468//protein phosphorylation;GO:0051726//regulation of cell cycle	GO:0004672//protein kinase activity;GO:0005515//protein binding;GO:0004693//cyclin-dependent protein serine/threonine kinase activity;GO:0008353//RNA polymerase II carboxy-terminal domain kinase activity;GO:0005524//ATP binding	-
10240	0	0	0	10	1	0	0	0	0	0	2	0	MRPS31;mitochondrial ribosomal protein S31	GO:0005730//nucleolus;GO:0005739//mitochondrion;GO:0005763//mitochondrial small ribosomal subunit	-	GO:0019904//protein domain specific binding;GO:0044822//poly(A) RNA binding;GO:0005515//protein binding;GO:0003735//structural constituent of ribosome	-
10241	0	89	3	39	97	0	14	0	7	0	0	0	CALCOCO2;calcium binding and coiled-coil domain 2	GO:0005737//cytoplasm;GO:0048471//perinuclear region of cytoplasm;GO:0005856//cytoskeleton;GO:0005634//nucleus;GO:0005794//Golgi apparatus;GO:0016020//membrane;GO:0043231//intracellular membrane-bounded organelle	GO:0016032//viral process;GO:0034341//response to interferon-gamma	GO:0042803//protein homodimerization activity;GO:0005515//protein binding	K15010//Glutamatergic synapse;K00939//Biosynthesis of secondary metabolites;Pyrimidine metabolism;Purine metabolism;Metabolic pathways;K11447//Transcriptional misregulation in cancer;K01539//Salivary secretion;Protein digestion and absorption;Cardiac muscle contraction;Carbohydrate digestion and absorption;Aldosterone-regulated sodium reabsorption;Mineral absorption;Pancreatic secretion;Endocrine…
10242	0	0	0	0	19	0	0	0	19	0	0	0	KCNMB2;potassium large conductance calcium-activated channel, subfamily M, beta member 2	GO:0008076//voltage-gated potassium channel complex;GO:0005887//integral component of plasma membrane;GO:0005886//plasma membrane	GO:0007268//synaptic transmission;GO:0071805//potassium ion transmembrane transport;GO:0019228//neuronal action potential;GO:0019229//regulation of vasoconstriction;GO:0006813//potassium ion transport;GO:0007596//blood coagulation;GO:0005513//detection of calcium ion;GO:0001508//action potential	GO:0015269//calcium-activated potassium channel activity;GO:0008200//ion channel inhibitor activity;GO:0015459//potassium channel regulator activity	K04938//Vascular smooth muscle contraction
10243	0	29	1	8	9	23	0	0	10	0	17	0	GPHN;gephyrin	GO:0005737//cytoplasm;GO:0060077//inhibitory synapse;GO:0005856//cytoskeleton;GO:0005886//plasma membrane;GO:0030054//cell junction;GO:0045211//postsynaptic membrane	GO:0007529//establishment of synaptic specificity at neuromuscular junction;GO:0006766//vitamin metabolic process;GO:0006777//Mo-molybdopterin cofactor biosynthetic process;GO:0044281//small molecule metabolic process;GO:0006767//water-soluble vitamin metabolic process	GO:0061599//molybdopterin molybdotransferase activity;GO:0061598//molybdopterin adenylyltransferase activity;GO:0005524//ATP binding;GO:0046872//metal ion binding;GO:0016740//transferase activity	K15376//GABAergic synapse
10244	0	66	0	0	0	21	0	0	17	0	0	0	RABEPK;Rab9 effector protein with kelch motifs	GO:0005886//plasma membrane;GO:0005768//endosome;GO:0010008//endosome membrane;GO:0043231//intracellular membrane-bounded organelle	GO:0006904//vesicle docking involved in exocytosis;GO:0006898//receptor-mediated endocytosis	-	K14966//Herpes simplex infection
10245	0	239	90	93	94	0	46	0	43	0	189	0	TIMM17B;translocase of inner mitochondrial membrane 17 homolog B (yeast)	GO:0005744//mitochondrial inner membrane presequence translocase complex;GO:0031305//integral component of mitochondrial inner membrane	GO:0006626//protein targeting to mitochondrion;GO:0071806//protein transmembrane transport;GO:0044267//cellular protein metabolic process	GO:0015450//P-P-bond-hydrolysis-driven protein transmembrane transporter activity	-
10246	0	0	0	0	0	0	0	0	30	119	0	307	SLC17A2;solute carrier family 17, member 2	GO:0005887//integral component of plasma membrane;GO:0016020//membrane	GO:0006814//sodium ion transport;GO:0035435//phosphate ion transmembrane transport;GO:0006796//phosphate-containing compound metabolic process;GO:0035725//sodium ion transmembrane transport	GO:0005436//sodium:phosphate symporter activity	-
102464823	43	0	0	0	0	0	0	0	0	0	0	0	MIR6068;microRNA 6068	-	-	-	-
102464824	113	0	0	0	0	0	0	0	0	0	0	0	MIR6069;microRNA 6069	-	-	-	-
102464825	0	0	0	0	0	0	0	0	1	0	0	0	MIR6070;microRNA 6070	-	-	-	-
102464828	0	0	0	0	0	0	0	0	10	0	0	0	MIR6076;microRNA 6076	-	-	-	-
102464830	0	0	0	0	0	0	0	0	26	0	0	0	MIR6079;microRNA 6079	-	-	-	-
102464834	0	0	0	0	0	26	0	0	0	0	0	0	MIR6085;microRNA 6085	-	-	-	-
102464836	0	0	0	0	0	0	0	0	0	0	10	0	MIR6088;microRNA 6088	-	-	-	-
102465134	0	85	3	82	117	0	0	39	0	0	238	1	MIR6126;microRNA 6126	-	-	-	-
102465140	0	0	0	0	0	0	0	0	6	0	0	0	MIR6134;microRNA 6134	-	-	-	-
102465141	1	0	0	0	0	0	0	0	0	0	0	0	MIR6165;microRNA 6165	-	-	-	-
102465247	0	0	0	0	0	12	0	0	0	0	0	0	MIR548AY;microRNA 548ay	-	-	-	-
102465255	0	0	0	0	0	0	10	0	0	0	0	0	MIR6512;microRNA 6512	-	-	-	-
102465432	2	0	2	0	4	0	0	0	0	0	0	1	MIR6723;microRNA 6723	-	-	-	K02256//Cardiac muscle contraction;Metabolic pathways;Parkinson's disease;Huntington's disease;Oxidative phosphorylation;Alzheimer's disease
102465452	0	0	0	0	0	0	0	0	0	0	3	0	MIR6755;microRNA 6755	-	-	-	-
102465507	0	0	0	0	0	0	0	0	10	0	0	0	MIR6842;microRNA 6842	-	-	-	-
102465694	0	0	0	0	0	1	18	0	0	0	0	0	MIR7161;microRNA 7161	-	-	-	-
102465753	0	0	0	0	0	0	0	0	19	67	0	0	MIR7641-2;microRNA 7641-2	-	-	-	-
102465842	0	0	0	0	0	0	0	0	11	0	0	0	MIR7856;microRNA 7856	-	-	-	-
102465856	0	0	0	0	0	0	14	0	0	0	0	0	MIR7974;microRNA 7974	-	-	-	-
102465860	0	0	0	0	0	0	0	0	13	0	0	0	MIR8054;microRNA 8054	-	-	-	-
102465861	0	0	0	0	0	0	0	0	22	0	0	0	MIR8055;microRNA 8055	-	-	-	-
102465862	0	0	0	0	0	0	0	4	0	0	0	0	MIR8056;microRNA 8056	-	-	-	-
102465865	0	0	0	0	0	0	0	0	11	0	0	0	MIR8062;microRNA 8062	-	-	-	-
102465870	0	0	0	0	0	0	3	0	0	0	0	0	MIR8070;microRNA 8070	-	-	-	-
102465876	0	0	0	0	0	0	0	0	20	0	0	0	MIR8079;microRNA 8079	-	-	-	-
102465881	0	0	0	4	0	0	0	0	0	0	1	0	MIR8087;microRNA 8087	-	-	-	-
102465944	49	0	0	0	0	0	0	0	0	0	0	0	MIR6072;microRNA 6072	-	-	-	-
102466081	0	0	0	0	0	0	21	0	0	0	0	0	MIR5739;microRNA 5739	-	-	-	-
102466162	0	0	0	0	0	0	0	0	0	0	0	2	MIR548AZ;microRNA 548az	-	-	-	-
102466225	0	0	0	0	0	0	0	0	1	0	0	0	MIR6077;microRNA 6077	-	-	-	-
102466235	0	0	0	1	0	0	0	0	0	0	0	0	MIR7515;microRNA 7515	-	-	-	-
102466247	0	0	0	0	6	0	0	0	0	0	0	0	MIR1273H;microRNA 1273h	-	-	-	-
102466252	0	0	0	0	0	0	0	0	0	117	0	0	MIR8069-1;microRNA 8069-1	-	-	-	-
102466721	0	0	0	0	0	0	0	0	0	0	4	0	MIR892C;microRNA 892c	-	-	-	-
102466732	0	0	0	0	0	0	0	0	29	0	0	0	MIR6774;microRNA 6774	-	-	-	-
102466737	0	0	0	0	0	21	0	0	0	0	0	0	MIR6793;microRNA 6793	-	-	-	-
102466812	0	0	0	0	0	0	0	0	1	0	0	0	MIR6511A2;microRNA 6511a-2	-	-	-	-
102466866	0	0	0	0	0	0	47	0	17	0	0	0	MIR7853;microRNA 7853	-	-	-	-
102466878	78	36	185	19	9	2	2	1406	270	1	44	24	MIR8078;microRNA 8078	-	-	-	-
102466880	0	0	0	0	0	0	0	0	16	0	0	0	MIR8088;microRNA 8088	-	-	-	-
102466918	153	0	0	0	0	0	0	0	0	0	0	0	MIR8059;microRNA 8059	-	-	-	-
102467003	0	0	0	0	0	0	0	0	1	0	0	0	MIR7851;microRNA 7851	-	-	-	-
10247	39	0	0	5	24	36	0	0	3	0	0	0	HRSP12;heat-responsive protein 12	GO:0005739//mitochondrion;GO:0070062//extracellular vesicular exosome;GO:0005634//nucleus;GO:0005737//cytoplasm	GO:0006449//regulation of translational termination;GO:0090305//nucleic acid phosphodiester bond hydrolysis	GO:0019239//deaminase activity;GO:0044822//poly(A) RNA binding;GO:0004519//endonuclease activity	K02908//Ribosome
10248	60	0	0	0	0	0	0	0	6	0	0	0	POP7;processing of precursor 7, ribonuclease P/MRP subunit (S. cerevisiae)	GO:0005655//nucleolar ribonuclease P complex;GO:0005634//nucleus;GO:0005737//cytoplasm	GO:0008033//tRNA processing;GO:0090501//RNA phosphodiester bond hydrolysis;GO:0090502//RNA phosphodiester bond hydrolysis, endonucleolytic	GO:0044822//poly(A) RNA binding;GO:0005515//protein binding;GO:0004526//ribonuclease P activity	K14527//Ribosome biogenesis in eukaryotes;RNA transport
10249	0	0	0	0	0	5	0	0	13	0	0	0	GLYAT;glycine-N-acyltransferase	GO:0005739//mitochondrion;GO:0070062//extracellular vesicular exosome;GO:0005759//mitochondrial matrix	GO:0006544//glycine metabolic process;GO:0044281//small molecule metabolic process;GO:0006805//xenobiotic metabolic process;GO:0009636//response to toxic substance;GO:0032787//monocarboxylic acid metabolic process;GO:0006637//acyl-CoA metabolic process	GO:0047961//glycine N-acyltransferase activity;GO:0047962//glycine N-benzoyltransferase activity;GO:0016746//transferase activity, transferring acyl groups	K00628//Phenylalanine metabolism;K15517//Phenylalanine metabolism
1025	0	16	0	0	9	0	0	54	60	0	0	0	CDK9;cyclin-dependent kinase 9	GO:0005634//nucleus;GO:0005730//nucleolus;GO:0016605//PML body;GO:0043231//intracellular membrane-bounded organelle;GO:0005737//cytoplasm;GO:0008024//positive transcription elongation factor complex b;GO:0005654//nucleoplasm;GO:0008023//transcription elongation factor complex;GO:0016020//membrane	GO:0006282//regulation of DNA repair;GO:0006368//transcription elongation from RNA polymerase II promoter;GO:0043111//replication fork arrest;GO:0007179//transforming growth factor beta receptor signaling pathway;GO:0008283//cell proliferation;GO:0006367//transcription initiation from RNA polymerase II promoter;GO:0006351//transcription, DNA-templated;GO:0071157//negative regulation of cell cycle…	GO:0003682//chromatin binding;GO:0005524//ATP binding;GO:0004672//protein kinase activity;GO:0003677//DNA binding;GO:0044212//transcription regulatory region DNA binding;GO:0004693//cyclin-dependent protein serine/threonine kinase activity;GO:0008353//RNA polymerase II carboxy-terminal domain kinase activity;GO:0017069//snRNA binding;GO:0005515//protein binding	K02211//Transcriptional misregulation in cancer
10250	0	3	0	59	355	0	52	24	52	0	5	0	SRRM1;serine/arginine repetitive matrix 1	GO:0005634//nucleus;GO:0016363//nuclear matrix;GO:0005654//nucleoplasm;GO:0005730//nucleolus;GO:0071013//catalytic step 2 spliceosome;GO:0005829//cytosol;GO:0016607//nuclear speck	GO:0006369//termination of RNA polymerase II transcription;GO:0010467//gene expression;GO:0008380//RNA splicing;GO:0006366//transcription from RNA polymerase II promoter;GO:0000398//mRNA splicing, via spliceosome;GO:0000375//RNA splicing, via transesterification reactions;GO:0031124//mRNA 3'-end processing;GO:0006406//mRNA export from nucleus	GO:0003677//DNA binding;GO:0044822//poly(A) RNA binding	K13171//RNA transport;mRNA surveillance pathway
10251	58	0	0	0	0	7	60	0	30	0	0	0	SPRY3;sprouty homolog 3 (Drosophila)	GO:0016020//membrane;GO:0005737//cytoplasm	GO:0007275//multicellular organismal development;GO:0009966//regulation of signal transduction	-	K04704//Jak-STAT signaling pathway
10252	0	0	0	0	5	23	0	23	0	0	7	0	SPRY1;sprouty homolog 1, antagonist of FGF signaling (Drosophila)	GO:0005829//cytosol;GO:0005886//plasma membrane	GO:0007173//epidermal growth factor receptor signaling pathway;GO:0042059//negative regulation of epidermal growth factor receptor signaling pathway;GO:0007275//multicellular organismal development	GO:0005515//protein binding	K04704//Jak-STAT signaling pathway
10253	0	0	32	0	1	12	42	0	0	0	0	0	SPRY2;sprouty homolog 2 (Drosophila)	GO:0005874//microtubule;GO:0032587//ruffle membrane;GO:0005829//cytosol;GO:0005886//plasma membrane	GO:0040037//negative regulation of fibroblast growth factor receptor signaling pathway;GO:0000132//establishment of mitotic spindle orientation;GO:0070374//positive regulation of ERK1 and ERK2 cascade;GO:0043407//negative regulation of MAP kinase activity;GO:0033138//positive regulation of peptidyl-serine phosphorylation;GO:0010801//negative regulation of peptidyl-threonine phosphorylation;GO:006…	GO:0005515//protein binding;GO:0019901//protein kinase binding;GO:0043539//protein serine/threonine kinase activator activity;GO:0030291//protein serine/threonine kinase inhibitor activity	K04704//Jak-STAT signaling pathway
10254	19	95	1	55	86	9	14	55	104	141	22	3	STAM2;signal transducing adaptor molecule (SH3 domain and ITAM motif) 2	GO:0005634//nucleus;GO:0005737//cytoplasm;GO:0005829//cytosol;GO:0043231//intracellular membrane-bounded organelle;GO:0031901//early endosome membrane;GO:0005730//nucleolus	GO:0007173//epidermal growth factor receptor signaling pathway;GO:0016197//endosomal transport;GO:0061024//membrane organization;GO:0042059//negative regulation of epidermal growth factor receptor signaling pathway;GO:0006886//intracellular protein transport	GO:0005515//protein binding	K04705//Jak-STAT signaling pathway;Endocytosis
1026	0	1	0	0	2	0	0	33	13	0	0	0	CDKN1A;cyclin-dependent kinase inhibitor 1A (p21, Cip1)	GO:0005654//nucleoplasm;GO:0000307//cyclin-dependent protein kinase holoenzyme complex;GO:0005634//nucleus;GO:0005829//cytosol;GO:0070557//PCNA-p21 complex;GO:0043231//intracellular membrane-bounded organelle;GO:0005730//nucleolus	GO:0046685//response to arsenic-containing substance;GO:0043066//negative regulation of apoptotic process;GO:0008285//negative regulation of cell proliferation;GO:0048015//phosphatidylinositol-mediated signaling;GO:0030308//negative regulation of cell growth;GO:0048146//positive regulation of fibroblast proliferation;GO:0009411//response to UV;GO:0009636//response to toxic substance;GO:0071850//m…	GO:0004861//cyclin-dependent protein serine/threonine kinase inhibitor activity;GO:0032403//protein complex binding;GO:0005515//protein binding;GO:0046872//metal ion binding;GO:0030332//cyclin binding;GO:0031625//ubiquitin protein ligase binding;GO:0019912//cyclin-dependent protein kinase activating kinase activity	K06625//Prostate cancer;Transcriptional misregulation in cancer;HTLV-I infection;Pathways in cancer;Epstein-Barr virus infection;Cell cycle;Bladder cancer;Glioma;p53 signaling pathway;ErbB signaling pathway;Melanoma;Hepatitis C;Chronic myeloid leukemia
10260	0	1	0	42	60	54	16	0	111	0	0	0	DENND4A;DENN/MADD domain containing 4A	GO:0005634//nucleus	GO:0006351//transcription, DNA-templated;GO:0032851//positive regulation of Rab GTPase activity;GO:0006355//regulation of transcription, DNA-templated	GO:0017112//Rab guanyl-nucleotide exchange factor activity;GO:0003677//DNA binding	K12861//Spliceosome
10261	0	0	0	0	0	0	0	0	55	0	0	0	IGSF6;immunoglobulin superfamily, member 6	GO:0005887//integral component of plasma membrane	GO:0007166//cell surface receptor signaling pathway;GO:0006955//immune response	GO:0004888//transmembrane signaling receptor activity	-
10262	0	25	1	20	27	0	38	0	45	0	0	0	SF3B4;splicing factor 3b, subunit 4, 49kDa	GO:0005681//spliceosomal complex;GO:0005689//U12-type spliceosomal complex;GO:0005654//nucleoplasm	GO:0000398//mRNA splicing, via spliceosome;GO:0000375//RNA splicing, via transesterification reactions;GO:0006397//mRNA processing;GO:0010467//gene expression;GO:0008380//RNA splicing	GO:0005515//protein binding;GO:0044822//poly(A) RNA binding;GO:0000166//nucleotide binding	K12831//Spliceosome
10263	0	32	1	0	0	43	45	71	11	0	0	0	CDK2AP2;cyclin-dependent kinase 2 associated protein 2	-	-	-	-
10265	0	0	0	0	18	0	29	0	15	0	0	0	IRX5;iroquois homeobox 5	GO:0005634//nucleus	GO:0002027//regulation of heart rate;GO:0008406//gonad development;GO:0006351//transcription, DNA-templated;GO:0042551//neuron maturation;GO:0050896//response to stimulus;GO:0006355//regulation of transcription, DNA-templated;GO:0007601//visual perception;GO:0060040//retinal bipolar neuron differentiation;GO:0048701//embryonic cranial skeleton morphogenesis	GO:0005499//vitamin D binding;GO:0043565//sequence-specific DNA binding	K15613//Transcriptional misregulation in cancer
10266	0	0	0	5	0	0	0	0	0	0	0	0	RAMP2;receptor (G protein-coupled) activity modifying protein 2	GO:0005886//plasma membrane;GO:0009986//cell surface;GO:0005737//cytoplasm;GO:0043235//receptor complex;GO:0005905//coated pit;GO:0005887//integral component of plasma membrane;GO:0005764//lysosome	GO:0070831//basement membrane assembly;GO:0007565//female pregnancy;GO:0045766//positive regulation of angiogenesis;GO:0002040//sprouting angiogenesis;GO:0001525//angiogenesis;GO:0001570//vasculogenesis;GO:0007507//heart development;GO:0006171//cAMP biosynthetic process;GO:0072659//protein localization to plasma membrane;GO:0034333//adherens junction assembly;GO:0035924//cellular response to vasc…	GO:0015026//coreceptor activity;GO:0008565//protein transporter activity;GO:0005515//protein binding	K08448//Vascular smooth muscle contraction
10268	0	0	0	0	0	0	2	25	0	0	0	0	RAMP3;receptor (G protein-coupled) activity modifying protein 3	GO:0005764//lysosome;GO:0005887//integral component of plasma membrane;GO:0043235//receptor complex;GO:0005622//intracellular;GO:0005886//plasma membrane;GO:0009986//cell surface	GO:0071392//cellular response to estradiol stimulus;GO:0045892//negative regulation of transcription, DNA-templated;GO:0008277//regulation of G-protein coupled receptor protein signaling pathway;GO:0001921//positive regulation of receptor recycling;GO:0072659//protein localization to plasma membrane;GO:0006816//calcium ion transport;GO:0015031//protein transport;GO:0090004//positive regulation of…	GO:0008565//protein transporter activity;GO:0015026//coreceptor activity;GO:0004872//receptor activity;GO:0005515//protein binding	K08449//Vascular smooth muscle contraction
10269	0	27	0	0	12	0	0	19	22	0	47	0	ZMPSTE24;zinc metallopeptidase STE24	GO:0005789//endoplasmic reticulum membrane;GO:0070062//extracellular vesicular exosome;GO:0005637//nuclear inner membrane;GO:0016020//membrane;GO:0016021//integral component of membrane	GO:0006508//proteolysis;GO:0071586//CAAX-box protein processing;GO:0030327//prenylated protein catabolic process;GO:0006998//nuclear envelope organization	GO:0008235//metalloexopeptidase activity;GO:0004222//metalloendopeptidase activity;GO:0046872//metal ion binding	K06013//Terpenoid backbone biosynthesis
1027	0	1	0	0	16	0	0	0	15	67	1	0	CDKN1B;cyclin-dependent kinase inhibitor 1B (p27, Kip1)	GO:0005634//nucleus;GO:0005737//cytoplasm;GO:0005654//nucleoplasm;GO:0043234//protein complex;GO:0005768//endosome;GO:0005829//cytosol	GO:0048102//autophagic cell death;GO:0007173//epidermal growth factor receptor signaling pathway;GO:0033673//negative regulation of kinase activity;GO:0000082//G1/S transition of mitotic cell cycle;GO:0048839//inner ear development;GO:0032355//response to estradiol;GO:0007050//cell cycle arrest;GO:0010942//positive regulation of cell death;GO:0071407//cellular response to organic cyclic compound;…	GO:0032403//protein complex binding;GO:0008656//cysteine-type endopeptidase activator activity involved in apoptotic process;GO:0019903//protein phosphatase binding;GO:0051087//chaperone binding;GO:0004861//cyclin-dependent protein serine/threonine kinase inhibitor activity;GO:0030544//Hsp70 protein binding;GO:0005072//transforming growth factor beta receptor, cytoplasmic mediator activity;GO:000…	K06624//Pathways in cancer;Small cell lung cancer;Prostate cancer;Transcriptional misregulation in cancer;Chronic myeloid leukemia;Epstein-Barr virus infection;Cell cycle;Measles;ErbB signaling pathway
10270	0	1	0	3	9	0	2	0	14	0	3	0	AKAP8;A kinase (PRKA) anchor protein 8	GO:0005634//nucleus;GO:0016363//nuclear matrix;GO:0005730//nucleolus;GO:0001939//female pronucleus;GO:0005739//mitochondrion;GO:0005794//Golgi apparatus;GO:0000793//condensed chromosome;GO:0016020//membrane	GO:0007165//signal transduction;GO:0007067//mitotic nuclear division;GO:0007076//mitotic chromosome condensation	GO:0003690//double-stranded DNA binding;GO:0034237//protein kinase A regulatory subunit binding;GO:0044822//poly(A) RNA binding;GO:0008270//zinc ion binding	K15978//Epstein-Barr virus infection
10272	0	23	0	0	0	1	0	0	0	0	0	0	FSTL3;follistatin-like 3 (secreted glycoprotein)	GO:0005576//extracellular region;GO:0005794//Golgi apparatus;GO:0005730//nucleolus;GO:0005615//extracellular space;GO:0030141//secretory granule;GO:0044306//neuron projection terminus;GO:0005634//nucleus	GO:0045944//positive regulation of transcription from RNA polymerase II promoter;GO:0030514//negative regulation of BMP signaling pathway;GO:0006357//regulation of transcription from RNA polymerase II promoter;GO:0045671//negative regulation of osteoclast differentiation;GO:0030324//lung development;GO:0090101//negative regulation of transmembrane receptor protein serine/threonine kinase signalin…	GO:0001968//fibronectin binding;GO:0005515//protein binding;GO:0048185//activin binding	K04661//TGF-beta signaling pathway
102723426	0	0	0	0	0	0	0	0	1	0	0	0	LOC102723426;uncharacterized LOC102723426	-	-	-	K00939//Purine metabolism;Pyrimidine metabolism;Biosynthesis of secondary metabolites;Metabolic pathways;K00797//beta-Alanine metabolism;Metabolic pathways;Arginine and proline metabolism;Glutathione metabolism;Cysteine and methionine metabolism;Ribosome;K14443//RNA degradation
102723508	0	0	0	0	0	0	0	0	22	0	0	0	KANTR;KDM5C adjacent non-coding transcript	-	-	-	K05692//Bacterial invasion of epithelial cells;Tight junction;Leukocyte transendothelial migration;Shigellosis;Dilated cardiomyopathy;Regulation of actin cytoskeleton;Hypertrophic cardiomyopathy (HCM);Focal adhesion;Vibrio cholerae infection;Pathogenic Escherichia coli infection;Gastric acid secretion;Salmonella infection;Phagosome;Arrhythmogenic right ventricular cardiomyopathy (ARVC);Influenza …
102723631	0	0	0	0	0	0	0	2	19	0	0	0	LOC102723631;cancer/testis antigen family 45 member A-like	-	-	-	-
102723775	0	0	0	0	0	0	27	0	0	0	0	0	LINC01315;long intergenic non-protein coding RNA 1315	-	-	-	-
102724153	0	16	46	2	0	37	7	99	155	148	35	0	LOC102724153;uncharacterized LOC102724153	-	-	-	-
102724316	0	0	0	0	17	0	26	17	13	0	0	0	LOC102724316;uncharacterized LOC102724316	-	-	-	-
102724368	0	2	0	0	0	0	0	0	0	0	0	0	CELSR3-AS1;CELSR3 antisense RNA 1 (head to head)	-	-	-	-
102724558	0	0	0	0	0	0	0	0	4	0	0	0	LOC102724558;uncharacterized LOC102724558	-	-	-	K00939//Metabolic pathways;Purine metabolism;Pyrimidine metabolism;Biosynthesis of secondary metabolites;K11447//Transcriptional misregulation in cancer
102724631	3	0	0	0	0	0	2	0	7	0	0	0	LOC102724631;POTE ankyrin domain family, member B-like	-	-	-	-
102724814	53	949	475	636	1008	20	34	971	181	0	1135	2	LOC102724814;uncharacterized LOC102724814	-	-	-	K12391//Lysosome
102724855	87	0	0	0	0	0	0	0	21	0	0	0	CTD-2151A2.1;uncharacterized LOC102724855	-	-	-	K01195//Starch and sucrose metabolism;Drug metabolism - other enzymes;Lysosome;Porphyrin and chlorophyll metabolism;Metabolic pathways;Pentose and glucuronate interconversions;Glycosaminoglycan degradation
10273	90	514	189	466	689	0	0	733	175	1	1127	3	STUB1;STIP1 homology and U-box containing protein 1, E3 ubiquitin protein ligase	GO:0005634//nucleus;GO:0042405//nuclear inclusion body;GO:0045111//intermediate filament cytoskeleton;GO:0005730//nucleolus;GO:0005829//cytosol;GO:0031371//ubiquitin conjugating enzyme complex;GO:0005737//cytoplasm;GO:0000151//ubiquitin ligase complex;GO:0070062//extracellular vesicular exosome;GO:0005886//plasma membrane;GO:0005783//endoplasmic reticulum	GO:0006511//ubiquitin-dependent protein catabolic process;GO:0051865//protein autoubiquitination;GO:0006515//misfolded or incompletely synthesized protein catabolic process;GO:0043161//proteasome-mediated ubiquitin-dependent protein catabolic process;GO:0032436//positive regulation of proteasomal ubiquitin-dependent protein catabolic process;GO:0007179//transforming growth factor beta receptor si…	GO:0001664//G-protein coupled receptor binding;GO:0019900//kinase binding;GO:0042803//protein homodimerization activity;GO:0051787//misfolded protein binding;GO:0005515//protein binding;GO:0004842//ubiquitin-protein transferase activity;GO:0046332//SMAD binding;GO:0019899//enzyme binding;GO:0030911//TPR domain binding;GO:0031625//ubiquitin protein ligase binding;GO:0030674//protein binding, bridg…	K09561//Ubiquitin mediated proteolysis;Protein processing in endoplasmic reticulum
10274	0	0	0	15	34	21	32	0	20	0	0	0	STAG1;stromal antigen 1	GO:0000775//chromosome, centromeric region;GO:0005634//nucleus;GO:0000785//chromatin;GO:0005654//nucleoplasm;GO:0005694//chromosome;GO:0030054//cell junction;GO:0005829//cytosol	GO:0007059//chromosome segregation;GO:0007067//mitotic nuclear division;GO:0000278//mitotic cell cycle	GO:0005515//protein binding;GO:0003682//chromatin binding	K06671//Meiosis - yeast;Cell cycle;Cell cycle - yeast
10276	0	32	1	53	189	0	39	120	61	60	10	0	NET1;neuroepithelial cell transforming 1	GO:0005829//cytosol;GO:0005886//plasma membrane;GO:0005634//nucleus	GO:0007165//signal transduction;GO:0071479//cellular response to ionizing radiation;GO:0007264//small GTPase mediated signal transduction;GO:0001558//regulation of cell growth;GO:0048011//neurotrophin TRK receptor signaling pathway;GO:0032321//positive regulation of Rho GTPase activity;GO:0051056//regulation of small GTPase mediated signal transduction;GO:0097190//apoptotic signaling pathway;GO:0…	GO:0017049//GTP-Rho binding;GO:0005089//Rho guanyl-nucleotide exchange factor activity;GO:0005085//guanyl-nucleotide exchange factor activity	K07532//Tuberculosis;Axon guidance;Regulation of actin cytoskeleton;Vascular smooth muscle contraction;K12365//Chemokine signaling pathway;K12331//Vascular smooth muscle contraction
10277	0	47	0	20	177	0	2	1	86	5	0	0	UBE4B;ubiquitination factor E4B	GO:0005737//cytoplasm;GO:0000151//ubiquitin ligase complex	GO:0043161//proteasome-mediated ubiquitin-dependent protein catabolic process;GO:0042787//protein ubiquitination involved in ubiquitin-dependent protein catabolic process;GO:0008626//granzyme-mediated apoptotic signaling pathway;GO:0009411//response to UV	GO:0034450//ubiquitin-ubiquitin ligase activity;GO:0019899//enzyme binding	K10597//Protein processing in endoplasmic reticulum;Ubiquitin mediated proteolysis
10278	0	1	1	1	10	0	0	60	0	46	7	0	EFS;embryonal Fyn-associated substrate	GO:0005737//cytoplasm	GO:0007155//cell adhesion;GO:0035556//intracellular signal transduction	GO:0017124//SH3 domain binding;GO:0019904//protein domain specific binding	K05726//Regulation of actin cytoskeleton;Bacterial invasion of epithelial cells;Chemokine signaling pathway;Leukocyte transendothelial migration;Focal adhesion
10279	110	0	0	0	0	0	14	0	15	0	0	0	PRSS16;protease, serine, 16 (thymus)	GO:0005768//endosome;GO:0016023//cytoplasmic membrane-bounded vesicle;GO:0005764//lysosome	GO:0030163//protein catabolic process;GO:0006508//proteolysis	GO:0008236//serine-type peptidase activity	-
1028	0	1	0	22	0	0	0	1	0	0	44	0	CDKN1C;cyclin-dependent kinase inhibitor 1C (p57, Kip2)	GO:0005634//nucleus;GO:0005737//cytoplasm	GO:0033673//negative regulation of kinase activity;GO:0007568//aging;GO:0030099//myeloid cell differentiation;GO:0050680//negative regulation of epithelial cell proliferation;GO:0007050//cell cycle arrest;GO:0071514//genetic imprinting;GO:0042551//neuron maturation;GO:0045892//negative regulation of transcription, DNA-templated;GO:0001501//skeletal system development;GO:0042326//negative regulati…	GO:0005515//protein binding;GO:0004861//cyclin-dependent protein serine/threonine kinase inhibitor activity	K09993//Cell cycle
10280	0	0	0	0	0	0	1	1	14	0	0	0	SIGMAR1;sigma non-opioid intracellular receptor 1	GO:0005637//nuclear inner membrane;GO:0005635//nuclear envelope;GO:0005640//nuclear outer membrane;GO:0005789//endoplasmic reticulum membrane;GO:0005887//integral component of plasma membrane;GO:0030054//cell junction;GO:0005811//lipid particle;GO:0016021//integral component of membrane;GO:0030426//growth cone	GO:0006869//lipid transport;GO:0007399//nervous system development;GO:0043523//regulation of neuron apoptotic process;GO:0008219//cell death;GO:0038003//opioid receptor signaling pathway	GO:0008144//drug binding;GO:0004985//opioid receptor activity	-
10281	0	0	0	0	0	0	0	0	6	0	13	0	DSCR4;Down syndrome critical region gene 4	-	-	-	-
10282	0	0	0	26	87	0	5	0	0	0	0	0	BET1;Bet1 golgi vesicular membrane trafficking protein	GO:0016021//integral component of membrane;GO:0016020//membrane;GO:0005801//cis-Golgi network;GO:0000139//Golgi membrane;GO:0005789//endoplasmic reticulum membrane;GO:0031985//Golgi cisterna	GO:0048280//vesicle fusion with Golgi apparatus;GO:0006888//ER to Golgi vesicle-mediated transport;GO:0015031//protein transport	GO:0019905//syntaxin binding;GO:0005515//protein binding	K08504//SNARE interactions in vesicular transport
10284	0	31	1	28	48	0	0	0	1	0	0	0	SAP18;Sin3A-associated protein, 18kDa	GO:0005737//cytoplasm;GO:0005634//nucleus;GO:0061574//ASAP complex;GO:0005730//nucleolus;GO:0035145//exon-exon junction complex;GO:0000118//histone deacetylase complex;GO:0016607//nuclear speck	GO:0006351//transcription, DNA-templated;GO:0000381//regulation of alternative mRNA splicing, via spliceosome;GO:0048025//negative regulation of mRNA splicing, via spliceosome;GO:0043065//positive regulation of apoptotic process;GO:0006357//regulation of transcription from RNA polymerase II promoter;GO:0008380//RNA splicing;GO:0006397//mRNA processing	GO:0003714//transcription corepressor activity;GO:0044822//poly(A) RNA binding;GO:0005515//protein binding	K14324//RNA transport;mRNA surveillance pathway
10285	0	0	0	5	0	7	0	0	16	0	0	0	SMNDC1;survival motor neuron domain containing 1	GO:0045111//intermediate filament cytoskeleton;GO:0005681//spliceosomal complex;GO:0016607//nuclear speck;GO:0005737//cytoplasm;GO:0005634//nucleus;GO:0015030//Cajal body	GO:0006397//mRNA processing;GO:0008380//RNA splicing;GO:0000375//RNA splicing, via transesterification reactions;GO:0006915//apoptotic process	GO:0044822//poly(A) RNA binding;GO:0005515//protein binding	K12839//Spliceosome
10286	0	13	0	14	30	0	0	0	0	0	14	0	BCAS2;breast carcinoma amplified sequence 2	GO:0005634//nucleus;GO:0005730//nucleolus;GO:0030054//cell junction;GO:0005681//spliceosomal complex	GO:0000375//RNA splicing, via transesterification reactions;GO:0008380//RNA splicing;GO:0006397//mRNA processing	GO:0005515//protein binding	K12861//Spliceosome
10287	0	0	0	0	0	3	0	0	12	0	0	0	RGS19;regulator of G-protein signaling 19	GO:0016020//membrane;GO:0030136//clathrin-coated vesicle;GO:0005886//plasma membrane;GO:0005794//Golgi apparatus;GO:0005834//heterotrimeric G-protein complex;GO:0005903//brush border;GO:0005737//cytoplasm	GO:0007264//small GTPase mediated signal transduction;GO:0006914//autophagy;GO:0038032//termination of G-protein coupled receptor signaling pathway;GO:0043547//positive regulation of GTPase activity;GO:0007186//G-protein coupled receptor signaling pathway	GO:0005515//protein binding;GO:0001965//G-protein alpha-subunit binding;GO:0005096//GTPase activator activity	K07524//Axon guidance
10288	64	0	0	0	0	0	16	0	42	0	9	0	LILRB2;leukocyte immunoglobulin-like receptor, subfamily B (with TM and ITIM domains), member 2	GO:0005887//integral component of plasma membrane;GO:0005737//cytoplasm;GO:0005615//extracellular space;GO:0016020//membrane;GO:0009986//cell surface;GO:0005886//plasma membrane	GO:0006955//immune response;GO:0002578//negative regulation of antigen processing and presentation;GO:0002774//Fc receptor mediated inhibitory signaling pathway;GO:0007267//cell-cell signaling;GO:0045591//positive regulation of regulatory T cell differentiation;GO:0006968//cellular defense response;GO:0002666//positive regulation of T cell tolerance induction;GO:0042130//negative regulation of T …	GO:0023029//MHC class Ib protein binding;GO:0050839//cell adhesion molecule binding;GO:0008157//protein phosphatase 1 binding;GO:0005515//protein binding;GO:0032396//inhibitory MHC class I receptor activity;GO:0042288//MHC class I protein binding;GO:0004872//receptor activity	K06512//B cell receptor signaling pathway;Osteoclast differentiation
10289	0	0	1	15	38	0	0	0	4	0	0	0	EIF1B;eukaryotic translation initiation factor 1B	-	GO:0006446//regulation of translational initiation;GO:0006413//translational initiation	GO:0003743//translation initiation factor activity;GO:0044822//poly(A) RNA binding	K03113//RNA transport
1029	0	0	0	0	0	0	0	0	9	0	6	0	CDKN2A;cyclin-dependent kinase inhibitor 2A	GO:0005737//cytoplasm;GO:0043234//protein complex;GO:0016604//nuclear body;GO:0005654//nucleoplasm;GO:0035985//senescence-associated heterochromatin focus;GO:0005634//nucleus;GO:0005730//nucleolus;GO:0005739//mitochondrion;GO:0005829//cytosol	GO:2000774//positive regulation of cellular senescence;GO:0048103//somatic stem cell division;GO:1902510//regulation of apoptotic DNA fragmentation;GO:0008637//apoptotic mitochondrial changes;GO:0000082//G1/S transition of mitotic cell cycle;GO:0007050//cell cycle arrest;GO:0000209//protein polyubiquitination;GO:0006351//transcription, DNA-templated;GO:0033235//positive regulation of protein sumo…	GO:0019901//protein kinase binding;GO:0002039//p53 binding;GO:0003677//DNA binding;GO:0004861//cyclin-dependent protein serine/threonine kinase inhibitor activity;GO:0051059//NF-kappaB binding;GO:0005515//protein binding;GO:0044822//poly(A) RNA binding;GO:0008134//transcription factor binding;GO:0055105//ubiquitin-protein transferase inhibitor activity;GO:0097371//MDM2/MDM4 family protein binding	K06621//Bladder cancer;Glioma;p53 signaling pathway;Cell cycle;Non-small cell lung cancer;Chronic myeloid leukemia;Melanoma;Pathways in cancer;HTLV-I infection;Pancreatic cancer
10290	80	0	0	0	12	57	37	41	98	0	16	443	SPEG;SPEG complex locus	GO:0005634//nucleus	GO:0001701//in utero embryonic development;GO:0060541//respiratory system development;GO:0007517//muscle organ development;GO:0055013//cardiac muscle cell development;GO:0006468//protein phosphorylation;GO:0008285//negative regulation of cell proliferation	GO:0004674//protein serine/threonine kinase activity;GO:0005524//ATP binding	-
10291	0	51	0	33	191	20	1	0	25	23	6	0	SF3A1;splicing factor 3a, subunit 1, 120kDa	GO:0005654//nucleoplasm;GO:0005634//nucleus;GO:0071013//catalytic step 2 spliceosome;GO:0005681//spliceosomal complex;GO:0005730//nucleolus;GO:0005684//U2-type spliceosomal complex	GO:0006397//mRNA processing;GO:0010467//gene expression;GO:0008380//RNA splicing;GO:0000389//mRNA 3'-splice site recognition;GO:0000398//mRNA splicing, via spliceosome	GO:0044822//poly(A) RNA binding;GO:0005515//protein binding;GO:0003723//RNA binding	K12825//Spliceosome
10293	102	0	0	0	0	0	0	0	27	0	20	0	TRAIP;TRAF interacting protein	GO:0048471//perinuclear region of cytoplasm;GO:0005730//nucleolus	GO:0035556//intracellular signal transduction;GO:0016567//protein ubiquitination;GO:0007165//signal transduction;GO:0008283//cell proliferation;GO:0006915//apoptotic process	GO:0008270//zinc ion binding;GO:0005057//receptor signaling protein activity;GO:0016874//ligase activity;GO:0005515//protein binding;GO:0004842//ubiquitin-protein transferase activity	-
10294	0	0	0	21	99	0	0	0	55	1	0	0	DNAJA2;DnaJ (Hsp40) homolog, subfamily A, member 2	GO:0070062//extracellular vesicular exosome;GO:0016020//membrane;GO:0005829//cytosol	GO:0008284//positive regulation of cell proliferation;GO:0042026//protein refolding;GO:0009408//response to heat	GO:0005515//protein binding;GO:0046872//metal ion binding;GO:0051082//unfolded protein binding;GO:0031072//heat shock protein binding;GO:0051087//chaperone binding;GO:0005524//ATP binding	K09503//Protein processing in endoplasmic reticulum
10295	0	0	0	4	42	0	0	44	12	0	0	0	BCKDK;branched chain ketoacid dehydrogenase kinase	GO:0005739//mitochondrion;GO:0005947//mitochondrial alpha-ketoglutarate dehydrogenase complex	GO:0009083//branched-chain amino acid catabolic process;GO:0016310//phosphorylation;GO:0009063//cellular amino acid catabolic process;GO:0006468//protein phosphorylation	GO:0004674//protein serine/threonine kinase activity;GO:0005515//protein binding;GO:0047323//[3-methyl-2-oxobutanoate dehydrogenase (acetyl-transferring)] kinase activity;GO:0005524//ATP binding;GO:0016301//kinase activity	-
10296	0	27	1	2	27	0	18	42	53	0	0	0	MAEA;macrophage erythroblast attacher	GO:0005856//cytoskeleton;GO:0005634//nucleus;GO:0005826//actomyosin contractile ring;GO:0005819//spindle;GO:0016363//nuclear matrix;GO:0005887//integral component of plasma membrane	GO:0051301//cell division;GO:0043249//erythrocyte maturation;GO:0007346//regulation of mitotic cell cycle;GO:0007049//cell cycle;GO:0048822//enucleate erythrocyte development;GO:0033033//negative regulation of myeloid cell apoptotic process;GO:0007010//cytoskeleton organization;GO:0007155//cell adhesion	GO:0003779//actin binding	-
10297	82	241	174	65	183	16	17	252	77	73	572	0	APC2;adenomatosis polyposis coli 2	GO:0016342//catenin complex;GO:0048471//perinuclear region of cytoplasm;GO:0015630//microtubule cytoskeleton;GO:0005884//actin filament;GO:0031258//lamellipodium membrane;GO:0005737//cytoplasm;GO:0005881//cytoplasmic microtubule;GO:0005794//Golgi apparatus;GO:0000139//Golgi membrane	GO:0016055//Wnt signaling pathway;GO:0035414//negative regulation of catenin import into nucleus;GO:0090090//negative regulation of canonical Wnt signaling pathway	GO:0008013//beta-catenin binding;GO:0005515//protein binding;GO:0008017//microtubule binding	K02085//HTLV-I infection;Regulation of actin cytoskeleton;Wnt signaling pathway;Endometrial cancer;Pathways in cancer;Colorectal cancer;Basal cell carcinoma
10298	42	16	0	16	28	0	14	0	8	0	20	0	PAK4;p21 protein (Cdc42/Rac)-activated kinase 4	GO:0005794//Golgi apparatus;GO:0005925//focal adhesion	GO:0008283//cell proliferation;GO:0006915//apoptotic process;GO:0006928//cellular component movement;GO:0006468//protein phosphorylation;GO:0007010//cytoskeleton organization;GO:0016477//cell migration;GO:0016049//cell growth;GO:0007165//signal transduction;GO:0007049//cell cycle	GO:0004674//protein serine/threonine kinase activity;GO:0005515//protein binding;GO:0004672//protein kinase activity;GO:0005524//ATP binding	K05734//ErbB signaling pathway;Focal adhesion;Renal cell carcinoma;Axon guidance;T cell receptor signaling pathway;Regulation of actin cytoskeleton
10299	45	1	0	0	6	16	0	0	47	0	0	0	MARCH6;membrane-associated ring finger (C3HC4) 6, E3 ubiquitin protein ligase	GO:0016020//membrane;GO:0030176//integral component of endoplasmic reticulum membrane	GO:0070936//protein K48-linked ubiquitination	GO:0004842//ubiquitin-protein transferase activity;GO:0016874//ligase activity;GO:0008270//zinc ion binding;GO:0019899//enzyme binding;GO:0031624//ubiquitin conjugating enzyme binding	K10661//Protein processing in endoplasmic reticulum
103	0	183	1	73	359	26	1	0	48	56	7	0	ADAR;adenosine deaminase, RNA-specific	GO:0005730//nucleolus;GO:0044530//supraspliceosomal complex;GO:0016020//membrane;GO:0005634//nucleus;GO:0005737//cytoplasm;GO:0005654//nucleoplasm	GO:0019221//cytokine-mediated signaling pathway;GO:0031054//pre-miRNA processing;GO:0045071//negative regulation of viral genome replication;GO:0006611//protein export from nucleus;GO:0044387//negative regulation of protein kinase activity by regulation of protein phosphorylation;GO:0016556//mRNA modification;GO:0006606//protein import into nucleus;GO:0051607//defense response to virus;GO:0006382…	GO:0003677//DNA binding;GO:0005515//protein binding;GO:0046872//metal ion binding;GO:0044822//poly(A) RNA binding;GO:0003726//double-stranded RNA adenosine deaminase activity	K12968//Cytosolic DNA-sensing pathway;Influenza A;Measles
1030	0	0	0	2	0	16	21	0	44	0	0	0	CDKN2B;cyclin-dependent kinase inhibitor 2B (p15, inhibits CDK4)	GO:0005730//nucleolus;GO:0005829//cytosol;GO:0005737//cytoplasm;GO:0005634//nucleus	GO:0042326//negative regulation of phosphorylation;GO:0000079//regulation of cyclin-dependent protein serine/threonine kinase activity;GO:0034097//response to cytokine;GO:0071901//negative regulation of protein serine/threonine kinase activity;GO:0000278//mitotic cell cycle;GO:0031668//cellular response to extracellular stimulus;GO:0000086//G2/M transition of mitotic cell cycle;GO:0030511//positi…	GO:0004861//cyclin-dependent protein serine/threonine kinase inhibitor activity;GO:0005515//protein binding;GO:0019901//protein kinase binding	K04685//Small cell lung cancer;TGF-beta signaling pathway;Cell cycle;Pathways in cancer;HTLV-I infection
10300	0	0	0	0	1	7	25	0	44	56	0	0	KATNB1;katanin p80 (WD repeat containing) subunit B 1	GO:0016020//membrane;GO:0030426//growth cone;GO:0043025//neuronal cell body;GO:0005813//centrosome;GO:0005737//cytoplasm;GO:0030424//axon;GO:0030496//midbody;GO:0008352//katanin complex;GO:0000922//spindle pole;GO:0005874//microtubule;GO:0005634//nucleus	GO:0006605//protein targeting;GO:0007026//negative regulation of microtubule depolymerization;GO:0010942//positive regulation of cell death;GO:0051013//microtubule severing;GO:0006200//ATP catabolic process;GO:0007079//mitotic chromosome movement towards spindle pole;GO:0010976//positive regulation of neuron projection development;GO:0031117//positive regulation of microtubule depolymerization	GO:0008568//microtubule-severing ATPase activity;GO:0046982//protein heterodimerization activity;GO:0045502//dynein binding;GO:0008017//microtubule binding	K01062//Metabolic pathways;Ether lipid metabolism;Biosynthesis of secondary metabolites
10302	0	425	303	367	509	0	0	86	27	1	510	0	SNAPC5;small nuclear RNA activating complex, polypeptide 5, 19kDa	GO:0005634//nucleus;GO:0005654//nucleoplasm;GO:0005730//nucleolus	GO:0006384//transcription initiation from RNA polymerase III promoter;GO:0006355//regulation of transcription, DNA-templated;GO:0010467//gene expression;GO:0006366//transcription from RNA polymerase II promoter;GO:0006383//transcription from RNA polymerase III promoter	GO:0003700//sequence-specific DNA binding transcription factor activity	-
10307	0	35	0	10	0	17	0	82	27	0	9	0	APBB3;amyloid beta (A4) precursor protein-binding, family B, member 3	GO:0015629//actin cytoskeleton;GO:0005737//cytoplasm;GO:0005634//nucleus	-	GO:0005515//protein binding	-
10308	0	0	0	11	0	17	14	0	18	0	0	0	ZNF267;zinc finger protein 267	GO:0005634//nucleus	GO:0007275//multicellular organismal development;GO:0006355//regulation of transcription, DNA-templated;GO:0006351//transcription, DNA-templated	GO:0003700//sequence-specific DNA binding transcription factor activity;GO:0046872//metal ion binding;GO:0003677//DNA binding	-
1031	0	0	0	0	7	0	0	0	0	0	0	0	CDKN2C;cyclin-dependent kinase inhibitor 2C (p18, inhibits CDK4)	GO:0005829//cytosol;GO:0005737//cytoplasm;GO:0005634//nucleus	GO:0008285//negative regulation of cell proliferation;GO:0071901//negative regulation of protein serine/threonine kinase activity;GO:0030308//negative regulation of cell growth;GO:0000278//mitotic cell cycle;GO:0000079//regulation of cyclin-dependent protein serine/threonine kinase activity;GO:0042326//negative regulation of phosphorylation;GO:0007050//cell cycle arrest;GO:0048709//oligodendrocyt…	GO:0005515//protein binding;GO:0019901//protein kinase binding;GO:0004861//cyclin-dependent protein serine/threonine kinase inhibitor activity	K06622//HTLV-I infection;Transcriptional misregulation in cancer;Cell cycle
10311	1	0	16	0	60	9	0	0	2	0	34	0	DSCR3;Down syndrome critical region gene 3	GO:0005634//nucleus	-	-	K00939//Purine metabolism;Biosynthesis of secondary metabolites;Pyrimidine metabolism;Metabolic pathways;K11447//Transcriptional misregulation in cancer;K01539//Oxidative phosphorylation;Gastric acid secretion;Proximal tubule bicarbonate reclamation;Bile secretion;Pancreatic secretion;Mineral absorption;Endocrine and other factor-regulated calcium reabsorption;Aldosterone-regulated sodium reabsor…
10312	96	0	0	0	0	34	41	0	8	0	0	1	TCIRG1;T-cell, immune regulator 1, ATPase, H+ transporting, lysosomal V0 subunit A3	GO:0005739//mitochondrion;GO:0005887//integral component of plasma membrane;GO:0010008//endosome membrane;GO:0005886//plasma membrane;GO:0030670//phagocytic vesicle membrane;GO:0000220//vacuolar proton-transporting V-type ATPase, V0 domain;GO:0016324//apical plasma membrane;GO:0005765//lysosomal membrane	GO:0015992//proton transport;GO:0006968//cellular defense response;GO:0008286//insulin receptor signaling pathway;GO:0055085//transmembrane transport;GO:0051701//interaction with host;GO:0090382//phagosome maturation;GO:0033572//transferrin transport;GO:0008284//positive regulation of cell proliferation;GO:0006879//cellular iron ion homeostasis;GO:0015991//ATP hydrolysis coupled proton transport	GO:0015078//hydrogen ion transmembrane transporter activity;GO:0005215//transporter activity	K02154//Tuberculosis;Synaptic vesicle cycle;Collecting duct acid secretion;Rheumatoid arthritis;Phagosome;Epithelial cell signaling in Helicobacter pylori infection;Vibrio cholerae infection;Lysosome;Oxidative phosphorylation;Metabolic pathways
10313	0	0	0	8	25	0	0	39	6	0	0	0	RTN3;reticulon 3	GO:0005615//extracellular space;GO:0005783//endoplasmic reticulum;GO:0000139//Golgi membrane;GO:0016021//integral component of membrane;GO:0070062//extracellular vesicular exosome;GO:0005789//endoplasmic reticulum membrane	GO:0071786//endoplasmic reticulum tubular network organization;GO:0016032//viral process;GO:0006915//apoptotic process;GO:0016192//vesicle-mediated transport;GO:0006950//response to stress	-	K00688//Starch and sucrose metabolism;Insulin signaling pathway
10314	0	57	3	23	80	25	30	0	88	0	14	0	LANCL1;LanC lantibiotic synthetase component C-like 1 (bacterial)	GO:0005887//integral component of plasma membrane;GO:0005737//cytoplasm;GO:0005634//nucleus;GO:0070062//extracellular vesicular exosome	GO:0008152//metabolic process;GO:0007186//G-protein coupled receptor signaling pathway	GO:0043295//glutathione binding;GO:0004930//G-protein coupled receptor activity;GO:0050750//low-density lipoprotein particle receptor binding;GO:0003824//catalytic activity;GO:0005515//protein binding;GO:0008270//zinc ion binding;GO:0017124//SH3 domain binding	-
10316	0	0	0	0	0	0	0	0	34	0	8	0	NMUR1;neuromedin U receptor 1	GO:0005887//integral component of plasma membrane;GO:0005886//plasma membrane;GO:0016021//integral component of membrane	GO:0006821//chloride transport;GO:0048016//inositol phosphate-mediated signaling;GO:0019722//calcium-mediated signaling;GO:0006939//smooth muscle contraction;GO:0007202//activation of phospholipase C activity;GO:0006816//calcium ion transport;GO:0007186//G-protein coupled receptor signaling pathway;GO:0007200//phospholipase C-activating G-protein coupled receptor signaling pathway;GO:0007218//neu…	GO:0008188//neuropeptide receptor activity;GO:0004930//G-protein coupled receptor activity;GO:0001607//neuromedin U receptor activity	K05052//Neuroactive ligand-receptor interaction
10317	0	0	0	0	0	25	1	0	0	0	0	0	B3GALT5;UDP-Gal:betaGlcNAc beta 1,3-galactosyltransferase, polypeptide 5	GO:0005794//Golgi apparatus;GO:0005783//endoplasmic reticulum;GO:0016021//integral component of membrane;GO:0000139//Golgi membrane	GO:0006486//protein glycosylation	GO:0008499//UDP-galactose:beta-N-acetylglucosamine beta-1,3-galactosyltransferase activity	K03877//Glycosphingolipid biosynthesis - lacto and neolacto series;Glycosphingolipid biosynthesis - globo series;Metabolic pathways
103171574	0	0	0	0	0	0	0	74	0	2	0	0	LOC103171574;uncharacterized LOC103171574	-	-	-	-
10318	0	34	36	4	16	16	0	1	40	0	0	0	TNIP1;TNFAIP3 interacting protein 1	GO:0005634//nucleus;GO:0005737//cytoplasm;GO:0005622//intracellular	GO:0045071//negative regulation of viral genome replication;GO:0070373//negative regulation of ERK1 and ERK2 cascade;GO:0050729//positive regulation of inflammatory response;GO:0006412//translation;GO:0007159//leukocyte cell-cell adhesion;GO:0002755//MyD88-dependent toll-like receptor signaling pathway;GO:0085032//modulation by symbiont of host I-kappaB kinase/NF-kappaB cascade;GO:0045944//positi…	GO:0005515//protein binding;GO:0004843//ubiquitin-specific protease activity;GO:0051019//mitogen-activated protein kinase binding	K06669//Oocyte meiosis;Meiosis - yeast;Cell cycle;Cell cycle - yeast
10319	88	8	0	0	0	15	10	202	68	0	11	122	LAMC3;laminin, gamma 3	GO:0005578//proteinaceous extracellular matrix;GO:0016020//membrane;GO:0005604//basement membrane;GO:0005576//extracellular region	GO:0030198//extracellular matrix organization;GO:0060041//retina development in camera-type eye;GO:0000904//cell morphogenesis involved in differentiation;GO:0007601//visual perception;GO:0014002//astrocyte development;GO:0007155//cell adhesion	GO:0005198//structural molecule activity	K06247//Pathways in cancer;Toxoplasmosis;ECM-receptor interaction;Focal adhesion;Small cell lung cancer;Amoebiasis
1032	0	0	0	0	14	0	0	0	0	0	0	0	CDKN2D;cyclin-dependent kinase inhibitor 2D (p19, inhibits CDK4)	GO:0005829//cytosol;GO:0005737//cytoplasm;GO:0005634//nucleus	GO:0009411//response to UV;GO:0008285//negative regulation of cell proliferation;GO:1902230//negative regulation of intrinsic apoptotic signaling pathway in response to DNA damage;GO:0030308//negative regulation of cell growth;GO:0043154//negative regulation of cysteine-type endopeptidase activity involved in apoptotic process;GO:0007605//sensory perception of sound;GO:0048102//autophagic cell de…	GO:0004861//cyclin-dependent protein serine/threonine kinase inhibitor activity;GO:0019901//protein kinase binding;GO:0005515//protein binding	K06623//Cell cycle
10320	10	0	0	0	0	77	18	0	53	0	14	0	IKZF1;IKAROS family zinc finger 1 (Ikaros)	GO:0005721//pericentric heterochromatin;GO:0005737//cytoplasm;GO:0005634//nucleus	GO:0007498//mesoderm development;GO:0000122//negative regulation of transcription from RNA polymerase II promoter;GO:0030900//forebrain development;GO:0045660//positive regulation of neutrophil differentiation;GO:0006351//transcription, DNA-templated;GO:0030217//T cell differentiation;GO:0007049//cell cycle;GO:0048541//Peyer's patch development;GO:0048538//thymus development;GO:0048535//lymph nod…	GO:0003677//DNA binding;GO:0043565//sequence-specific DNA binding;GO:0046872//metal ion binding;GO:0046982//protein heterodimerization activity;GO:0003700//sequence-specific DNA binding transcription factor activity	-
10321	0	0	0	0	0	0	0	0	26	0	0	0	CRISP3;cysteine-rich secretory protein 3	GO:0005615//extracellular space;GO:0005576//extracellular region;GO:0070062//extracellular vesicular exosome;GO:0042581//specific granule;GO:0005578//proteinaceous extracellular matrix	GO:0006952//defense response;GO:0045087//innate immune response	-	-
10322	0	1	0	0	0	0	4	108	0	0	0	0	SMYD5;SMYD family member 5	-	GO:0032259//methylation	GO:0008168//methyltransferase activity;GO:0046872//metal ion binding	-
10324	0	0	0	0	0	18	0	0	11	0	0	0	KLHL41;kelch-like family member 41	GO:0031143//pseudopodium;GO:0001726//ruffle;GO:0031463//Cul3-RING ubiquitin ligase complex;GO:0005737//cytoplasm;GO:0031430//M band;GO:0005856//cytoskeleton	GO:0030239//myofibril assembly;GO:0045661//regulation of myoblast differentiation;GO:0016567//protein ubiquitination;GO:2000291//regulation of myoblast proliferation;GO:0031275//regulation of lateral pseudopodium assembly;GO:2001014//regulation of skeletal muscle cell differentiation;GO:0035914//skeletal muscle cell differentiation;GO:0006941//striated muscle contraction	GO:0005515//protein binding	-
10325	0	0	0	3	19	0	12	0	9	0	0	0	RRAGB;Ras-related GTP binding B	GO:0043231//intracellular membrane-bounded organelle;GO:0005794//Golgi apparatus;GO:0005764//lysosome;GO:0005737//cytoplasm;GO:0005634//nucleus;GO:0005765//lysosomal membrane	GO:0071230//cellular response to amino acid stimulus;GO:0034613//cellular protein localization;GO:0032008//positive regulation of TOR signaling	GO:0005525//GTP binding;GO:0005515//protein binding	-
10326	0	0	0	0	0	0	0	26	0	6	0	0	SIRPB1;signal-regulatory protein beta 1	GO:0005887//integral component of plasma membrane;GO:0016021//integral component of membrane;GO:0005886//plasma membrane;GO:0070062//extracellular vesicular exosome	GO:0045087//innate immune response;GO:0007166//cell surface receptor signaling pathway;GO:0007165//signal transduction	GO:0005515//protein binding	K06551//Osteoclast differentiation
10327	0	23	1	8	47	0	0	0	20	0	1	0	AKR1A1;aldo-keto reductase family 1, member A1 (aldehyde reductase)	GO:0016324//apical plasma membrane;GO:0070062//extracellular vesicular exosome;GO:0005829//cytosol;GO:0005615//extracellular space	GO:0042840//D-glucuronate catabolic process;GO:0006081//cellular aldehyde metabolic process;GO:0046185//aldehyde catabolic process;GO:0019853//L-ascorbic acid biosynthetic process;GO:0055114//oxidation-reduction process;GO:0006006//glucose metabolic process	GO:0009055//electron carrier activity;GO:0047939//L-glucuronate reductase activity;GO:0004032//alditol:NADP+ 1-oxidoreductase activity	K00002//Metabolic pathways;Tyrosine metabolism;Naphthalene degradation;Glycerolipid metabolism;Chloroalkane and chloroalkene degradation;Fatty acid metabolism;Microbial metabolism in diverse environments;Glycolysis / Gluconeogenesis;Biosynthesis of secondary metabolites;Caprolactam degradation
10328	0	0	0	4	22	0	0	0	53	0	0	0	EMC8;ER membrane protein complex subunit 8	GO:0005739//mitochondrion;GO:0016020//membrane;GO:0072546//ER membrane protein complex;GO:0005737//cytoplasm;GO:0005634//nucleus	-	-	-
10329	0	0	1	0	0	0	0	53	7	0	0	0	TMEM5;transmembrane protein 5	GO:0005887//integral component of plasma membrane	-	-	-
10330	0	0	0	34	11	0	29	0	0	0	0	0	CNPY2;canopy FGF signaling regulator 2	GO:0005887//integral component of plasma membrane;GO:0005783//endoplasmic reticulum	GO:0010988//regulation of low-density lipoprotein particle clearance;GO:0010629//negative regulation of gene expression;GO:0045716//positive regulation of low-density lipoprotein particle receptor biosynthetic process	GO:0005515//protein binding	K01647//Glyoxylate and dicarboxylate metabolism;Metabolic pathways;Citrate cycle (TCA cycle);ABC transporters;Pyruvate metabolism;Methane metabolism;Biosynthesis of secondary metabolites;Microbial metabolism in diverse environments
10331	0	0	0	0	0	18	37	0	17	0	2	0	B3GNT3;UDP-GlcNAc:betaGal beta-1,3-N-acetylglucosaminyltransferase 3	GO:0000139//Golgi membrane;GO:0005887//integral component of plasma membrane	GO:0044267//cellular protein metabolic process;GO:0044281//small molecule metabolic process;GO:0030203//glycosaminoglycan metabolic process;GO:0005975//carbohydrate metabolic process;GO:0018146//keratan sulfate biosynthetic process;GO:0043687//post-translational protein modification;GO:0016266//O-glycan processing	GO:0047223//beta-1,3-galactosyl-O-glycosyl-glycoprotein beta-1,3-N-acetylglucosaminyltransferase activity;GO:0008378//galactosyltransferase activity	K07970//Glycosphingolipid biosynthesis - lacto and neolacto series;Metabolic pathways
10332	83	0	0	0	0	0	0	0	3	230	0	0	CLEC4M;C-type lectin domain family 4, member M	GO:0016020//membrane;GO:0005576//extracellular region;GO:0005887//integral component of plasma membrane;GO:0005737//cytoplasm	GO:0046968//peptide antigen transport;GO:0035556//intracellular signal transduction;GO:0075733//intracellular transport of virus;GO:0009988//cell-cell recognition;GO:0019048//modulation by virus of host morphology or physiology;GO:0019079//viral genome replication;GO:0006897//endocytosis;GO:0010468//regulation of gene expression;GO:0019882//antigen processing and presentation;GO:0019062//virion a…	GO:0046872//metal ion binding;GO:0042605//peptide antigen binding;GO:0005537//mannose binding;GO:0030246//carbohydrate binding;GO:0046790//virion binding;GO:0030369//ICAM-3 receptor activity;GO:0004872//receptor activity	K06563//Phagosome;Measles;Tuberculosis
10333	0	0	0	0	0	0	25	0	72	0	0	0	TLR6;toll-like receptor 6	GO:0005886//plasma membrane;GO:0030670//phagocytic vesicle membrane;GO:0035355//Toll-like receptor 2-Toll-like receptor 6 protein complex;GO:0005887//integral component of plasma membrane	GO:0007165//signal transduction;GO:0034150//toll-like receptor 6 signaling pathway;GO:0006954//inflammatory response;GO:0042496//detection of diacyl bacterial lipopeptide;GO:0007250//activation of NF-kappaB-inducing kinase activity;GO:0038123//toll-like receptor TLR1:TLR2 signaling pathway;GO:0043507//positive regulation of JUN kinase activity;GO:0050707//regulation of cytokine secretion;GO:00520…	GO:0004872//receptor activity;GO:0004888//transmembrane signaling receptor activity;GO:0042498//diacyl lipopeptide binding;GO:0046982//protein heterodimerization activity;GO:0071723//lipopeptide binding	K10169//Phagosome;Chagas disease (American trypanosomiasis);Toll-like receptor signaling pathway;Tuberculosis
103344718	0	0	0	0	0	12	31	0	29	0	0	299	HOTS;H19 Opposite Tumor Suppressor	-	-	-	-
10335	41	56	68	12	17	15	1	102	54	30	2	363	MRVI1;murine retrovirus integration site 1 homolog	GO:0005789//endoplasmic reticulum membrane;GO:0031095//platelet dense tubular network membrane;GO:0048471//perinuclear region of cytoplasm;GO:0016021//integral component of membrane;GO:0016529//sarcoplasmic reticulum	GO:0060087//relaxation of vascular smooth muscle;GO:0007596//blood coagulation;GO:0019934//cGMP-mediated signaling	GO:0005515//protein binding	K12337//Vascular smooth muscle contraction
103352539	70	10	0	0	0	59	1	0	80	0	5	1	LINC01410;long intergenic non-protein coding RNA 1410	-	-	-	-
10336	0	63	20	101	147	0	11	70	65	1	135	0	PCGF3;polycomb group ring finger 3	GO:0031519//PcG protein complex;GO:0005634//nucleus	GO:0006355//regulation of transcription, DNA-templated;GO:0006351//transcription, DNA-templated	GO:0005515//protein binding;GO:0008270//zinc ion binding	-
10342	0	48	0	45	118	22	35	0	28	2	0	0	TFG;TRK-fused gene	GO:0005737//cytoplasm;GO:0070062//extracellular vesicular exosome	GO:0043123//positive regulation of I-kappaB kinase/NF-kappaB signaling;GO:0007165//signal transduction;GO:0008219//cell death	GO:0004871//signal transducer activity;GO:0005515//protein binding;GO:0042802//identical protein binding	K09292//Thyroid cancer;Pathways in cancer
10343	84	0	0	10	0	14	19	0	69	0	10	0	PKDREJ;polycystin (PKD) family receptor for egg jelly	GO:0005886//plasma membrane;GO:0016020//membrane;GO:0016021//integral component of membrane	GO:0050982//detection of mechanical stimulus;GO:0007340//acrosome reaction;GO:0070588//calcium ion transmembrane transport;GO:0060046//regulation of acrosome reaction;GO:0007218//neuropeptide signaling pathway	GO:0005262//calcium channel activity;GO:0005509//calcium ion binding	-
10344	0	0	0	0	0	0	0	0	15	0	1	0	CCL26;chemokine (C-C motif) ligand 26	GO:0005615//extracellular space	GO:0032855//positive regulation of Rac GTPase activity;GO:0006935//chemotaxis;GO:0006955//immune response;GO:0030335//positive regulation of cell migration;GO:0001938//positive regulation of endothelial cell proliferation;GO:0006954//inflammatory response;GO:0030838//positive regulation of actin filament polymerization;GO:0007267//cell-cell signaling;GO:0060326//cell chemotaxis;GO:0007165//signal…	GO:0008009//chemokine activity	K05514//Cytokine-cytokine receptor interaction;Chemokine signaling pathway
10345	0	0	0	0	0	47	30	0	122	7	0	0	TRDN;triadin	GO:0005783//endoplasmic reticulum;GO:0016021//integral component of membrane;GO:0005886//plasma membrane;GO:0033018//sarcoplasmic reticulum lumen;GO:0005737//cytoplasm;GO:0030314//junctional membrane complex;GO:0016529//sarcoplasmic reticulum;GO:0005891//voltage-gated calcium channel complex;GO:0033017//sarcoplasmic reticulum membrane;GO:0014701//junctional sarcoplasmic reticulum membrane;GO:0034…	GO:0060316//positive regulation of ryanodine-sensitive calcium-release channel activity;GO:0006874//cellular calcium ion homeostasis;GO:0010880//regulation of release of sequestered calcium ion into cytosol by sarcoplasmic reticulum;GO:0086036//regulation of cardiac muscle cell membrane potential;GO:0060315//negative regulation of ryanodine-sensitive calcium-release channel activity;GO:0055085//t…	GO:0005515//protein binding;GO:0044325//ion channel binding;GO:0030674//protein binding, bridging;GO:0042803//protein homodimerization activity;GO:0005102//receptor binding	-
10346	4	0	0	0	29	0	0	0	40	0	0	0	TRIM22;tripartite motif containing 22	GO:0005730//nucleolus;GO:0016607//nuclear speck;GO:0005634//nucleus;GO:0005737//cytoplasm;GO:0015030//Cajal body	GO:0016567//protein ubiquitination;GO:0009615//response to virus;GO:0006955//immune response;GO:0051091//positive regulation of sequence-specific DNA binding transcription factor activity;GO:0006351//transcription, DNA-templated;GO:0006355//regulation of transcription, DNA-templated;GO:0043123//positive regulation of I-kappaB kinase/NF-kappaB signaling;GO:0051092//positive regulation of NF-kappaB…	GO:0003714//transcription corepressor activity;GO:0003700//sequence-specific DNA binding transcription factor activity;GO:0016874//ligase activity;GO:0008270//zinc ion binding	-
10347	0	0	0	0	0	0	0	46	29	0	36	285	ABCA7;ATP-binding cassette, sub-family A (ABC1), member 7	GO:0005886//plasma membrane;GO:0005794//Golgi apparatus;GO:0016021//integral component of membrane;GO:0043190//ATP-binding cassette (ABC) transporter complex;GO:0001891//phagocytic cup;GO:0009986//cell surface;GO:0000139//Golgi membrane;GO:0010008//endosome membrane;GO:0016324//apical plasma membrane;GO:0005737//cytoplasm;GO:0032587//ruffle membrane	GO:1901076//positive regulation of engulfment of apoptotic cell;GO:0055085//transmembrane transport;GO:1902430//negative regulation of beta-amyloid formation;GO:0032780//negative regulation of ATPase activity;GO:0033344//cholesterol efflux;GO:0018149//peptide cross-linking;GO:1902995//positive regulation of phospholipid efflux;GO:0017121//phospholipid scrambling;GO:0032781//positive regulation of…	GO:0016887//ATPase activity;GO:0034188//apolipoprotein A-I receptor activity;GO:0005524//ATP binding;GO:0005215//transporter activity;GO:0005548//phospholipid transporter activity	K05645//ABC transporters
10349	0	0	20	0	0	13	0	0	105	0	18	0	ABCA10;ATP-binding cassette, sub-family A (ABC1), member 10	GO:0016021//integral component of membrane	GO:0006200//ATP catabolic process;GO:0006810//transport	GO:0016887//ATPase activity;GO:0005524//ATP binding	K05652//ABC transporters
10350	76	0	0	0	0	33	6	0	32	126	9	0	ABCA9;ATP-binding cassette, sub-family A (ABC1), member 9	GO:0016021//integral component of membrane;GO:0005739//mitochondrion	GO:0006200//ATP catabolic process;GO:0006810//transport	GO:0016887//ATPase activity;GO:0005524//ATP binding	K05651//ABC transporters
10351	1	0	0	0	0	43	10	46	36	0	0	0	ABCA8;ATP-binding cassette, sub-family A (ABC1), member 8	GO:0005886//plasma membrane;GO:0005743//mitochondrial inner membrane;GO:0016021//integral component of membrane	GO:0055085//transmembrane transport;GO:0006200//ATP catabolic process;GO:0006810//transport	GO:0005524//ATP binding;GO:0042626//ATPase activity, coupled to transmembrane movement of substances	K05650//ABC transporters
10352	0	0	0	0	28	0	0	0	37	83	0	0	WARS2;tryptophanyl tRNA synthetase 2, mitochondrial	GO:0005759//mitochondrial matrix	GO:0001570//vasculogenesis;GO:0006418//tRNA aminoacylation for protein translation;GO:0006436//tryptophanyl-tRNA aminoacylation;GO:0010467//gene expression	GO:0005524//ATP binding;GO:0004830//tryptophan-tRNA ligase activity	K01867//Ubiquinone and other terpenoid-quinone biosynthesis;Biosynthesis of secondary metabolites;Metabolic pathways;Aminoacyl-tRNA biosynthesis
1036	0	0	0	0	5	0	7	0	0	195	11	0	CDO1;cysteine dioxygenase type 1	GO:0005829//cytosol	GO:0044281//small molecule metabolic process;GO:0051384//response to glucocorticoid;GO:0000098//sulfur amino acid catabolic process;GO:0045471//response to ethanol;GO:0000097//sulfur amino acid biosynthetic process;GO:0042412//taurine biosynthetic process;GO:0006534//cysteine metabolic process;GO:0033762//response to glucagon;GO:0051591//response to cAMP;GO:0006954//inflammatory response;GO:00075…	GO:0017172//cysteine dioxygenase activity;GO:0008198//ferrous iron binding	K00456//Taurine and hypotaurine metabolism;Cysteine and methionine metabolism;Metabolic pathways
10360	0	11	0	0	17	0	0	37	17	0	9	0	NPM3;nucleophosmin/nucleoplasmin 3	GO:0005730//nucleolus	GO:0006364//rRNA processing;GO:0009303//rRNA transcription	GO:0005515//protein binding;GO:0044822//poly(A) RNA binding	-
10361	0	0	0	0	6	0	0	2	0	0	0	0	NPM2;nucleophosmin/nucleoplasmin 2	GO:0000789//cytoplasmic chromatin;GO:0005634//nucleus;GO:0000790//nuclear chromatin	GO:0007338//single fertilization;GO:0009790//embryo development;GO:0051260//protein homooligomerization;GO:0007096//regulation of exit from mitosis;GO:0045836//positive regulation of meiosis;GO:0009994//oocyte differentiation;GO:0045740//positive regulation of DNA replication;GO:0006338//chromatin remodeling;GO:0043085//positive regulation of catalytic activity	GO:0042393//histone binding;GO:0003676//nucleic acid binding;GO:0019899//enzyme binding;GO:0003682//chromatin binding	-
10362	0	19	0	27	97	6	0	2	26	1	0	321	HMG20B;high mobility group 20B	GO:0005694//chromosome;GO:0005730//nucleolus;GO:0005654//nucleoplasm;GO:0005634//nucleus	GO:0045666//positive regulation of neuron differentiation;GO:0007049//cell cycle;GO:0016568//chromatin modification;GO:0033234//negative regulation of protein sumoylation;GO:0006355//regulation of transcription, DNA-templated;GO:0035914//skeletal muscle cell differentiation;GO:0006351//transcription, DNA-templated;GO:0007596//blood coagulation	GO:0046982//protein heterodimerization activity;GO:0005515//protein binding;GO:0003677//DNA binding	-
10363	0	0	0	0	3	44	0	1	35	0	0	0	HMG20A;high mobility group 20A	GO:0005634//nucleus	GO:0016568//chromatin modification;GO:0006355//regulation of transcription, DNA-templated;GO:0000122//negative regulation of transcription from RNA polymerase II promoter;GO:0006325//chromatin organization;GO:0006351//transcription, DNA-templated;GO:0045665//negative regulation of neuron differentiation	GO:0003700//sequence-specific DNA binding transcription factor activity;GO:0046982//protein heterodimerization activity;GO:0005515//protein binding;GO:0003677//DNA binding	K10802//Base excision repair
10367	0	2	0	9	18	26	0	50	0	0	0	0	MICU1;mitochondrial calcium uptake 1	GO:0032592//integral component of mitochondrial membrane;GO:0034704//calcium channel complex;GO:1990246//uniplex complex;GO:0005743//mitochondrial inner membrane;GO:0005758//mitochondrial intermembrane space;GO:0005622//intracellular	GO:0006851//mitochondrial calcium ion transport;GO:0051561//positive regulation of mitochondrial calcium ion concentration;GO:0006952//defense response;GO:0051260//protein homooligomerization;GO:0070509//calcium ion import;GO:0051560//mitochondrial calcium ion homeostasis	GO:0005509//calcium ion binding;GO:0005515//protein binding;GO:0046982//protein heterodimerization activity	-
10368	0	0	0	0	0	28	0	0	25	0	17	0	CACNG3;calcium channel, voltage-dependent, gamma subunit 3	GO:0030666//endocytic vesicle membrane;GO:0005886//plasma membrane;GO:0032281//alpha-amino-3-hydroxy-5-methyl-4-isoxazolepropionic acid selective glutamate receptor complex;GO:0005891//voltage-gated calcium channel complex	GO:0007268//synaptic transmission;GO:0006816//calcium ion transport;GO:0070588//calcium ion transmembrane transport;GO:2000311//regulation of alpha-amino-3-hydroxy-5-methyl-4-isoxazole propionate selective glutamate receptor activity	GO:0005245//voltage-gated calcium channel activity	K04868//Hypertrophic cardiomyopathy (HCM);Arrhythmogenic right ventricular cardiomyopathy (ARVC);MAPK signaling pathway;Cardiac muscle contraction;Dilated cardiomyopathy
10369	61	0	0	0	0	0	0	13	25	0	9	0	CACNG2;calcium channel, voltage-dependent, gamma subunit 2	GO:0030666//endocytic vesicle membrane;GO:0005886//plasma membrane;GO:0005891//voltage-gated calcium channel complex;GO:0032281//alpha-amino-3-hydroxy-5-methyl-4-isoxazolepropionic acid selective glutamate receptor complex	GO:0007528//neuromuscular junction development;GO:0051899//membrane depolarization;GO:0060081//membrane hyperpolarization;GO:0070588//calcium ion transmembrane transport;GO:0007268//synaptic transmission;GO:2000311//regulation of alpha-amino-3-hydroxy-5-methyl-4-isoxazole propionate selective glutamate receptor activity;GO:0006810//transport;GO:0019226//transmission of nerve impulse	GO:0005515//protein binding;GO:0005245//voltage-gated calcium channel activity;GO:0035255//ionotropic glutamate receptor binding	K04867//Dilated cardiomyopathy;Cardiac muscle contraction;Arrhythmogenic right ventricular cardiomyopathy (ARVC);Hypertrophic cardiomyopathy (HCM);MAPK signaling pathway
10370	0	0	0	14	22	0	12	0	22	105	1	0	CITED2;Cbp/p300-interacting transactivator, with Glu/Asp-rich carboxy-terminal domain, 2	GO:0005634//nucleus;GO:0000790//nuclear chromatin;GO:0005737//cytoplasm	GO:0008283//cell proliferation;GO:0021602//cranial nerve morphogenesis;GO:0006351//transcription, DNA-templated;GO:0035802//adrenal cortex formation;GO:0030851//granulocyte differentiation;GO:0030336//negative regulation of cell migration;GO:0003197//endocardial cushion development;GO:0007417//central nervous system development;GO:0043066//negative regulation of apoptotic process;GO:0003156//regu…	GO:0001105//RNA polymerase II transcription coactivator activity;GO:0035035//histone acetyltransferase binding;GO:0046332//SMAD binding;GO:0050693//LBD domain binding;GO:0003682//chromatin binding;GO:0003714//transcription corepressor activity;GO:0003713//transcription coactivator activity;GO:0005515//protein binding;GO:0003700//sequence-specific DNA binding transcription factor activity;GO:00011…	-
10371	82	0	0	0	14	0	0	35	17	0	0	0	SEMA3A;sema domain, immunoglobulin domain (Ig), short basic domain, secreted, (semaphorin) 3A	GO:0005576//extracellular region;GO:0030424//axon;GO:0030425//dendrite;GO:0016020//membrane	GO:0010633//negative regulation of epithelial cell migration;GO:0060666//dichotomous subdivision of terminal units involved in salivary gland branching;GO:0048813//dendrite morphogenesis;GO:2001224//positive regulation of neuron migration;GO:0071526//semaphorin-plexin signaling pathway;GO:1902285//semaphorin-plexin signaling pathway involved in neuron projection guidance;GO:0007411//axon guidance…	GO:0038191//neuropilin binding;GO:0004872//receptor activity;GO:0045499//chemorepellent activity;GO:0030215//semaphorin receptor binding	K06840//Axon guidance
10376	0	1	0	3	36	0	41	0	21	0	0	0	TUBA1B;tubulin, alpha 1b	GO:0005881//cytoplasmic microtubule;GO:0070062//extracellular vesicular exosome;GO:0005874//microtubule	GO:0071353//cellular response to interleukin-4;GO:0051084//'de novo' posttranslational protein folding;GO:0030705//cytoskeleton-dependent intracellular transport;GO:0051301//cell division;GO:0000226//microtubule cytoskeleton organization;GO:0007017//microtubule-based process;GO:0044267//cellular protein metabolic process;GO:0006184//GTP catabolic process;GO:0006457//protein folding;GO:0051258//pr…	GO:0003725//double-stranded RNA binding;GO:0005515//protein binding;GO:0005198//structural molecule activity;GO:0005200//structural constituent of cytoskeleton;GO:0005525//GTP binding;GO:0003924//GTPase activity	K07374//Gap junction;Phagosome;Pathogenic Escherichia coli infection
10379	0	32	1	11	15	0	0	0	0	0	0	0	IRF9;interferon regulatory factor 9	GO:0005829//cytosol;GO:0005634//nucleus;GO:0005737//cytoplasm;GO:0005654//nucleoplasm	GO:0060337//type I interferon signaling pathway;GO:0045351//type I interferon biosynthetic process;GO:0051607//defense response to virus;GO:0006355//regulation of transcription, DNA-templated;GO:0007166//cell surface receptor signaling pathway;GO:0006366//transcription from RNA polymerase II promoter;GO:0019221//cytokine-mediated signaling pathway;GO:0060333//interferon-gamma-mediated signaling p…	GO:0000975//regulatory region DNA binding;GO:0003700//sequence-specific DNA binding transcription factor activity;GO:0005515//protein binding	K04693//Influenza A;Measles;Hepatitis C;Jak-STAT signaling pathway;Herpes simplex infection;Osteoclast differentiation
1038	60	0	0	23	117	0	0	0	0	0	0	0	CDR1;cerebellar degeneration-related protein 1, 34kDa	-	-	-	K05730//Regulation of actin cytoskeleton;Natural killer cell mediated cytotoxicity;T cell receptor signaling pathway;Focal adhesion;Fc epsilon RI signaling pathway;Chemokine signaling pathway;Leukocyte transendothelial migration;B cell receptor signaling pathway;Fc gamma R-mediated phagocytosis
10380	0	0	0	0	12	11	0	0	11	0	0	0	BPNT1;3'(2'), 5'-bisphosphate nucleotidase 1	GO:0070062//extracellular vesicular exosome;GO:0005829//cytosol	GO:0006139//nucleobase-containing compound metabolic process;GO:0016311//dephosphorylation;GO:0007399//nervous system development;GO:0006805//xenobiotic metabolic process;GO:0046854//phosphatidylinositol phosphorylation;GO:0050427//3'-phosphoadenosine 5'-phosphosulfate metabolic process;GO:0044281//small molecule metabolic process	GO:0000287//magnesium ion binding;GO:0004441//inositol-1,4-bisphosphate 1-phosphatase activity;GO:0008441//3'(2'),5'-bisphosphate nucleotidase activity	K01082//Sulfur metabolism;Metabolic pathways;Microbial metabolism in diverse environments
10381	0	0	0	0	0	0	0	0	0	0	11	0	TUBB3;tubulin, beta 3 class III	GO:0030425//dendrite;GO:0070062//extracellular vesicular exosome;GO:0005634//nucleus;GO:0005737//cytoplasm;GO:0005874//microtubule	GO:0051084//'de novo' posttranslational protein folding;GO:0006184//GTP catabolic process;GO:0006457//protein folding;GO:0051258//protein polymerization;GO:0007411//axon guidance;GO:0044267//cellular protein metabolic process;GO:0007017//microtubule-based process	GO:0005515//protein binding;GO:0005200//structural constituent of cytoskeleton;GO:0003924//GTPase activity;GO:0005525//GTP binding	K07375//Pathogenic Escherichia coli infection;Gap junction;Phagosome
10382	5	0	0	0	0	12	2	0	0	0	0	0	TUBB4A;tubulin, beta 4A class IVa	GO:0005634//nucleus;GO:0033269//internode region of axon;GO:0005874//microtubule;GO:0005929//cilium;GO:0005829//cytosol;GO:0043025//neuronal cell body;GO:0043209//myelin sheath;GO:0070062//extracellular vesicular exosome	GO:0051084//'de novo' posttranslational protein folding;GO:0000278//mitotic cell cycle;GO:0044267//cellular protein metabolic process;GO:0007017//microtubule-based process;GO:0000086//G2/M transition of mitotic cell cycle;GO:0006457//protein folding;GO:0006184//GTP catabolic process;GO:0051258//protein polymerization	GO:0005515//protein binding;GO:0003924//GTPase activity;GO:0005525//GTP binding;GO:0005200//structural constituent of cytoskeleton	K07375//Pathogenic Escherichia coli infection;Phagosome;Gap junction
10383	0	62	0	7	93	0	0	0	0	0	0	0	TUBB4B;tubulin, beta 4B class IVb	GO:0070062//extracellular vesicular exosome;GO:0005829//cytosol;GO:0031982//vesicle;GO:0005634//nucleus;GO:0005856//cytoskeleton;GO:0005874//microtubule	GO:0051084//'de novo' posttranslational protein folding;GO:0042267//natural killer cell mediated cytotoxicity;GO:0006457//protein folding;GO:0006184//GTP catabolic process;GO:0051258//protein polymerization;GO:0044267//cellular protein metabolic process;GO:0007017//microtubule-based process;GO:0006928//cellular component movement;GO:0000086//G2/M transition of mitotic cell cycle;GO:0000278//mitot…	GO:0051082//unfolded protein binding;GO:0003725//double-stranded RNA binding;GO:0005200//structural constituent of cytoskeleton;GO:0042288//MHC class I protein binding;GO:0005525//GTP binding;GO:0003924//GTPase activity	K07375//Pathogenic Escherichia coli infection;Gap junction;Phagosome
10384	0	0	0	0	0	11	0	0	9	0	0	0	BTN3A3;butyrophilin, subfamily 3, member A3	GO:0005737//cytoplasm;GO:0005794//Golgi apparatus;GO:0005886//plasma membrane;GO:0005730//nucleolus;GO:0016020//membrane;GO:0016021//integral component of membrane	GO:0002456//T cell mediated immunity	-	-
10385	0	0	0	0	0	0	0	0	34	54	0	0	BTN2A2;butyrophilin, subfamily 2, member A2	GO:0070062//extracellular vesicular exosome;GO:0016021//integral component of membrane	GO:0031324//negative regulation of cellular metabolic process;GO:0050710//negative regulation of cytokine secretion;GO:0046007//negative regulation of activated T cell proliferation	-	-
10388	0	0	0	0	18	13	5	0	22	0	12	0	SYCP2;synaptonemal complex protein 2	GO:0000800//lateral element;GO:0000795//synaptonemal complex;GO:0005634//nucleus	GO:0007130//synaptonemal complex assembly;GO:0007143//female meiotic division;GO:0009566//fertilization;GO:0007140//male meiosis;GO:0043066//negative regulation of apoptotic process;GO:0048808//male genitalia morphogenesis	GO:0003677//DNA binding;GO:0046982//protein heterodimerization activity	K09880//Cysteine and methionine metabolism
10389	41	0	0	0	0	0	10	0	39	0	0	0	SCML2;sex comb on midleg-like 2 (Drosophila)	GO:0005634//nucleus;GO:0031519//PcG protein complex	GO:0009653//anatomical structure morphogenesis;GO:0006351//transcription, DNA-templated;GO:0006355//regulation of transcription, DNA-templated	GO:0003700//sequence-specific DNA binding transcription factor activity;GO:0003677//DNA binding	-
1039	0	0	0	12	18	0	38	7	22	0	0	0	CDR2;cerebellar degeneration-related protein 2, 62kDa	GO:0005737//cytoplasm	-	GO:0005515//protein binding	K10381//Arrhythmogenic right ventricular cardiomyopathy (ARVC)
10390	0	33	0	30	91	0	17	0	18	0	77	0	CEPT1;choline/ethanolamine phosphotransferase 1	GO:0016021//integral component of membrane;GO:0005789//endoplasmic reticulum membrane;GO:0031965//nuclear membrane	GO:0046474//glycerophospholipid biosynthetic process;GO:0006629//lipid metabolic process;GO:0006644//phospholipid metabolic process;GO:0006646//phosphatidylethanolamine biosynthetic process;GO:0006657//CDP-choline pathway;GO:0044281//small molecule metabolic process;GO:0006656//phosphatidylcholine biosynthetic process	GO:0004142//diacylglycerol cholinephosphotransferase activity;GO:0046872//metal ion binding;GO:0004307//ethanolaminephosphotransferase activity	K13644//Metabolic pathways;Ether lipid metabolism;Glycerophospholipid metabolism
10391	84	0	0	0	0	14	36	0	47	1	3	0	CORO2B;coronin, actin binding protein, 2B	GO:0005737//cytoplasm;GO:0015629//actin cytoskeleton;GO:0016020//membrane	GO:0030036//actin cytoskeleton organization	GO:0003779//actin binding;GO:0051015//actin filament binding	K13882//Phagosome;Tuberculosis
103910	127	155	1	108	135	0	1	0	0	0	0	0	MYL12B;myosin, light chain 12B, regulatory	GO:0030018//Z disc;GO:0045177//apical part of cell;GO:0016460//myosin II complex;GO:0001725//stress fiber;GO:0005829//cytosol;GO:0070062//extracellular vesicular exosome	GO:0006936//muscle contraction;GO:0008360//regulation of cell shape;GO:0007411//axon guidance	GO:0005515//protein binding;GO:0005509//calcium ion binding	K12757//Tight junction;Regulation of actin cytoskeleton;Focal adhesion;Leukocyte transendothelial migration
10392	0	0	0	0	14	0	0	0	48	11	0	0	NOD1;nucleotide-binding oligomerization domain containing 1	GO:0005829//cytosol;GO:0016323//basolateral plasma membrane;GO:0016324//apical plasma membrane;GO:0005737//cytoplasm	GO:0006915//apoptotic process;GO:0070374//positive regulation of ERK1 and ERK2 cascade;GO:0035872//nucleotide-binding domain, leucine rich repeat containing receptor signaling pathway;GO:0035666//TRIF-dependent toll-like receptor signaling pathway;GO:0032755//positive regulation of interleukin-6 production;GO:0002756//MyD88-independent toll-like receptor signaling pathway;GO:0006954//inflammatory…	GO:0008656//cysteine-type endopeptidase activator activity involved in apoptotic process;GO:0005524//ATP binding;GO:0042834//peptidoglycan binding;GO:0050700//CARD domain binding;GO:0042802//identical protein binding;GO:0042803//protein homodimerization activity;GO:0005515//protein binding	K08727//NOD-like receptor signaling pathway;Epithelial cell signaling in Helicobacter pylori infection;Shigellosis;Pertussis
10393	0	59	10	97	128	0	13	0	29	0	131	0	ANAPC10;anaphase promoting complex subunit 10	GO:0005654//nucleoplasm;GO:0005829//cytosol;GO:0005680//anaphase-promoting complex	GO:0007094//mitotic spindle assembly checkpoint;GO:0000278//mitotic cell cycle;GO:0051436//negative regulation of ubiquitin-protein ligase activity involved in mitotic cell cycle;GO:0031145//anaphase-promoting complex-dependent proteasomal ubiquitin-dependent protein catabolic process;GO:0051437//positive regulation of ubiquitin-protein ligase activity involved in mitotic cell cycle;GO:0070979//p…	-	K03357//Cell cycle;Ubiquitin mediated proteolysis;Progesterone-mediated oocyte maturation;Cell cycle - yeast;Oocyte meiosis;HTLV-I infection;Meiosis - yeast
10394	0	0	14	0	0	17	25	0	0	0	0	0	PRG3;proteoglycan 3	-	GO:0045575//basophil activation;GO:0001694//histamine biosynthetic process;GO:0042554//superoxide anion generation;GO:0006955//immune response;GO:0042119//neutrophil activation;GO:0019370//leukotriene biosynthetic process;GO:0017148//negative regulation of translation;GO:0045416//positive regulation of interleukin-8 biosynthetic process	GO:0030246//carbohydrate binding	K10786//Asthma
10395	159	0	0	0	0	67	60	0	87	0	0	12	DLC1;DLC1 Rho GTPase activating protein	GO:0005925//focal adhesion;GO:0005829//cytosol;GO:0005737//cytoplasm;GO:0005634//nucleus;GO:0005901//caveola	GO:0007264//small GTPase mediated signal transduction;GO:0051056//regulation of small GTPase mediated signal transduction;GO:0006919//activation of cysteine-type endopeptidase activity involved in apoptotic process;GO:0008285//negative regulation of cell proliferation;GO:0030336//negative regulation of cell migration;GO:0032956//regulation of actin cytoskeleton organization;GO:0030900//forebrain …	GO:0030675//Rac GTPase activator activity;GO:0005100//Rho GTPase activator activity;GO:0005515//protein binding;GO:0008289//lipid binding;GO:0042169//SH2 domain binding	K08773//Pancreatic cancer;Pathways in cancer;K12490//Endocytosis;K07526//Axon guidance
10396	96	1	1	15	24	13	0	0	17	12	8	0	ATP8A1;ATPase, aminophospholipid transporter (APLT), class I, type 8A, member 1	GO:0042584//chromaffin granule membrane;GO:0005794//Golgi apparatus;GO:0070062//extracellular vesicular exosome;GO:0005886//plasma membrane;GO:0005783//endoplasmic reticulum;GO:0016020//membrane;GO:0016021//integral component of membrane	GO:0034220//ion transmembrane transport;GO:0045332//phospholipid translocation;GO:0055085//transmembrane transport;GO:0008152//metabolic process	GO:0005515//protein binding;GO:0004012//phospholipid-translocating ATPase activity;GO:0019829//cation-transporting ATPase activity;GO:0000287//magnesium ion binding;GO:0005524//ATP binding	-
10397	0	585	21	529	1837	21	11	4	15	0	12	0	NDRG1;N-myc downstream regulated 1	GO:0005913//cell-cell adherens junction;GO:0005737//cytoplasm;GO:0005813//centrosome;GO:0070062//extracellular vesicular exosome;GO:0005886//plasma membrane;GO:0005874//microtubule;GO:0015630//microtubule cytoskeleton;GO:0048471//perinuclear region of cytoplasm;GO:0005634//nucleus;GO:0005829//cytosol;GO:0055038//recycling endosome membrane	GO:0045576//mast cell activation;GO:0008219//cell death;GO:0090232//positive regulation of spindle checkpoint;GO:0010038//response to metal ion;GO:0032287//peripheral nervous system myelin maintenance;GO:0030330//DNA damage response, signal transduction by p53 class mediator;GO:0071456//cellular response to hypoxia	GO:0008017//microtubule binding;GO:0005515//protein binding;GO:0045296//cadherin binding;GO:0017137//Rab GTPase binding;GO:0043015//gamma-tubulin binding	-
10398	0	0	0	0	17	0	0	0	43	0	0	0	MYL9;myosin, light chain 9, regulatory	GO:0005829//cytosol;GO:0030018//Z disc;GO:0001725//stress fiber;GO:0005859//muscle myosin complex	GO:0006936//muscle contraction;GO:0070527//platelet aggregation;GO:0007411//axon guidance;GO:0006937//regulation of muscle contraction	GO:0008307//structural constituent of muscle;GO:0005509//calcium ion binding	K12757//Focal adhesion;Leukocyte transendothelial migration;Regulation of actin cytoskeleton;Tight junction;K12755//Tight junction;Vascular smooth muscle contraction;Regulation of actin cytoskeleton;Leukocyte transendothelial migration;Focal adhesion
10399	0	270	1	107	590	0	0	0	0	0	0	0	GNB2L1;guanine nucleotide binding protein (G protein), beta polypeptide 2-like 1	GO:0048471//perinuclear region of cytoplasm;GO:0005634//nucleus;GO:0015935//small ribosomal subunit;GO:0043204//perikaryon;GO:0030496//midbody;GO:0005739//mitochondrion;GO:0005829//cytosol;GO:0005737//cytoplasm;GO:0043025//neuronal cell body;GO:0005856//cytoskeleton;GO:0070062//extracellular vesicular exosome;GO:0030425//dendrite;GO:0001891//phagocytic cup	GO:0051302//regulation of cell division;GO:0051898//negative regulation of protein kinase B signaling;GO:0048511//rhythmic process;GO:0016032//viral process;GO:0007369//gastrulation;GO:2000543//positive regulation of gastrulation;GO:0017148//negative regulation of translation;GO:0030178//negative regulation of Wnt signaling pathway;GO:2000114//regulation of establishment of cell polarity;GO:00430…	GO:0005102//receptor binding;GO:0032947//protein complex scaffold;GO:0042169//SH2 domain binding;GO:0044822//poly(A) RNA binding;GO:0005515//protein binding;GO:0042803//protein homodimerization activity;GO:0030292//protein tyrosine kinase inhibitor activity;GO:0008200//ion channel inhibitor activity;GO:0019899//enzyme binding;GO:0030971//receptor tyrosine kinase binding;GO:0019903//protein phosph…	K14753//Measles
104	75	0	0	14	31	0	4	19	49	0	0	0	ADARB1;adenosine deaminase, RNA-specific, B1	GO:0005730//nucleolus;GO:0005654//nucleoplasm;GO:0005634//nucleus	GO:0030336//negative regulation of cell migration;GO:0051726//regulation of cell cycle;GO:0010467//gene expression;GO:0008285//negative regulation of cell proliferation;GO:0006397//mRNA processing;GO:0044387//negative regulation of protein kinase activity by regulation of protein phosphorylation;GO:0006382//adenosine to inosine editing;GO:0045087//innate immune response;GO:0051607//defense respon…	GO:0046872//metal ion binding;GO:0044822//poly(A) RNA binding;GO:0005515//protein binding;GO:0004000//adenosine deaminase activity;GO:0003729//mRNA binding;GO:0003725//double-stranded RNA binding;GO:0003723//RNA binding;GO:0003726//double-stranded RNA adenosine deaminase activity	-
1040	0	0	0	0	46	9	0	115	18	0	0	0	CDS1;CDP-diacylglycerol synthase (phosphatidate cytidylyltransferase) 1	GO:0005789//endoplasmic reticulum membrane;GO:0016021//integral component of membrane;GO:0005783//endoplasmic reticulum	GO:0016024//CDP-diacylglycerol biosynthetic process;GO:0006661//phosphatidylinositol biosynthetic process;GO:0006657//CDP-choline pathway;GO:0007602//phototransduction;GO:0007165//signal transduction;GO:0044281//small molecule metabolic process;GO:0006644//phospholipid metabolic process;GO:0046474//glycerophospholipid biosynthetic process	GO:0004142//diacylglycerol cholinephosphotransferase activity;GO:0004605//phosphatidate cytidylyltransferase activity	K00981//Glycerophospholipid metabolism;Ribosome;Shigellosis;Phosphatidylinositol signaling system;Metabolic pathways;RNA degradation
10400	0	0	0	0	12	10	0	0	0	0	11	0	PEMT;phosphatidylethanolamine N-methyltransferase	GO:0005789//endoplasmic reticulum membrane;GO:0031966//mitochondrial membrane;GO:0016021//integral component of membrane	GO:0008283//cell proliferation;GO:0006629//lipid metabolic process;GO:0046474//glycerophospholipid biosynthetic process;GO:0006644//phospholipid metabolic process;GO:0032259//methylation;GO:0006656//phosphatidylcholine biosynthetic process;GO:0044281//small molecule metabolic process	GO:0004608//phosphatidylethanolamine N-methyltransferase activity;GO:0080101//phosphatidyl-N-dimethylethanolamine N-methyltransferase activity;GO:0000773//phosphatidyl-N-methylethanolamine N-methyltransferase activity	K00551//Glycerophospholipid metabolism;Metabolic pathways
10401	3	36	1	7	35	6	0	0	9	0	0	516	PIAS3;protein inhibitor of activated STAT, 3	GO:0030425//dendrite;GO:0045202//synapse;GO:0005737//cytoplasm;GO:0005634//nucleus	GO:0006351//transcription, DNA-templated;GO:0016925//protein sumoylation;GO:0006355//regulation of transcription, DNA-templated;GO:0045838//positive regulation of membrane potential;GO:0033235//positive regulation of protein sumoylation;GO:0010628//positive regulation of gene expression;GO:0009725//response to hormone	GO:0019899//enzyme binding;GO:0047485//protein N-terminus binding;GO:0019789//SUMO ligase activity;GO:0015459//potassium channel regulator activity;GO:0003676//nucleic acid binding;GO:0008022//protein C-terminus binding;GO:0005515//protein binding;GO:0008270//zinc ion binding	K16064//Ubiquitin mediated proteolysis;Jak-STAT signaling pathway
10402	0	51	0	0	0	0	0	0	4	0	19	0	ST3GAL6;ST3 beta-galactoside alpha-2,3-sialyltransferase 6	GO:0070062//extracellular vesicular exosome;GO:0030173//integral component of Golgi membrane;GO:0016021//integral component of membrane;GO:0000139//Golgi membrane	GO:0044281//small molecule metabolic process;GO:0030203//glycosaminoglycan metabolic process;GO:0097503//sialylation;GO:0018146//keratan sulfate biosynthetic process;GO:0005975//carbohydrate metabolic process;GO:0006664//glycolipid metabolic process;GO:0009311//oligosaccharide metabolic process;GO:0006464//cellular protein modification process;GO:0006486//protein glycosylation;GO:0071354//cellula…	GO:0052798//beta-galactoside alpha-2,3-sialyltransferase activity	K03792//Metabolic pathways;Glycosphingolipid biosynthesis - lacto and neolacto series
10403	0	0	45	0	0	35	27	0	52	0	0	0	NDC80;NDC80 kinetochore complex component	GO:0005829//cytosol;GO:0031262//Ndc80 complex;GO:0005634//nucleus;GO:0000775//chromosome, centromeric region;GO:0000776//kinetochore;GO:0000777//condensed chromosome kinetochore;GO:0016020//membrane;GO:0000942//condensed nuclear chromosome outer kinetochore	GO:0000070//mitotic sister chromatid segregation;GO:0000132//establishment of mitotic spindle orientation;GO:0007067//mitotic nuclear division;GO:0000278//mitotic cell cycle;GO:0008608//attachment of spindle microtubules to kinetochore;GO:0007052//mitotic spindle organization;GO:0007059//chromosome segregation	GO:0005515//protein binding	-
10404	0	18	0	1	0	0	19	0	0	0	0	0	CPQ;carboxypeptidase Q	GO:0005764//lysosome;GO:0005737//cytoplasm;GO:0005615//extracellular space;GO:0005783//endoplasmic reticulum;GO:0005794//Golgi apparatus;GO:0070062//extracellular vesicular exosome	GO:0006590//thyroid hormone generation;GO:0006508//proteolysis;GO:0042246//tissue regeneration;GO:0043171//peptide catabolic process	GO:0046872//metal ion binding;GO:0042803//protein homodimerization activity;GO:0070573//metallodipeptidase activity;GO:0004180//carboxypeptidase activity	K14592//Vitamin digestion and absorption;K06503//Phagosome;Hematopoietic cell lineage;Endocytosis
10407	0	0	0	0	0	0	2	0	0	0	0	0	SPAG11B;sperm associated antigen 11B	GO:0005576//extracellular region	GO:0007283//spermatogenesis	-	-
10409	0	140	43	69	229	0	31	58	83	85	149	1	BASP1;brain abundant, membrane attached signal protein 1	GO:0031982//vesicle;GO:0005737//cytoplasm;GO:0030426//growth cone;GO:0005856//cytoskeleton;GO:0005886//plasma membrane;GO:0070062//extracellular vesicular exosome;GO:0030054//cell junction;GO:0005634//nucleus;GO:0016607//nuclear speck;GO:0008180//COP9 signalosome	GO:0021762//substantia nigra development;GO:0072112//glomerular visceral epithelial cell differentiation;GO:0072075//metanephric mesenchyme development;GO:2001076//positive regulation of metanephric ureteric bud development;GO:0060421//positive regulation of heart growth;GO:0060539//diaphragm development;GO:0008406//gonad development;GO:0007356//thorax and anterior abdomen determination;GO:004589…	GO:0005515//protein binding;GO:0019904//protein domain specific binding;GO:0044212//transcription regulatory region DNA binding;GO:0003714//transcription corepressor activity	-
1041	62	0	0	0	0	0	0	0	16	0	16	0	CDSN;corneodesmosin	GO:0001533//cornified envelope;GO:0005911//cell-cell junction;GO:0030057//desmosome;GO:0070062//extracellular vesicular exosome	GO:0016337//single organismal cell-cell adhesion;GO:0007155//cell adhesion;GO:0030216//keratinocyte differentiation;GO:0008544//epidermis development;GO:0043589//skin morphogenesis	GO:0042803//protein homodimerization activity	-
10410	0	0	0	0	38	15	2	0	0	0	0	0	IFITM3;interferon induced transmembrane protein 3	GO:0016021//integral component of membrane;GO:0070062//extracellular vesicular exosome;GO:0005886//plasma membrane;GO:0031902//late endosome membrane;GO:0005765//lysosomal membrane	GO:0006955//immune response;GO:0045071//negative regulation of viral genome replication;GO:0046597//negative regulation of viral entry into host cell;GO:0034341//response to interferon-gamma;GO:0032897//negative regulation of viral transcription;GO:0019221//cytokine-mediated signaling pathway;GO:0009615//response to virus;GO:0035456//response to interferon-beta;GO:0051607//defense response to vir…	GO:0005515//protein binding	K06566//B cell receptor signaling pathway
10411	0	44	48	23	11	32	8	0	48	0	5	0	RAPGEF3;Rap guanine nucleotide exchange factor (GEF) 3	GO:0070062//extracellular vesicular exosome;GO:0005886//plasma membrane;GO:0012505//endomembrane system;GO:0016020//membrane;GO:0005952//cAMP-dependent protein kinase complex	GO:0007596//blood coagulation;GO:0071320//cellular response to cAMP;GO:0006112//energy reserve metabolic process;GO:0051496//positive regulation of stress fiber assembly;GO:0030168//platelet activation;GO:0032486//Rap protein signal transduction;GO:0045859//regulation of protein kinase activity;GO:0007165//signal transduction;GO:0008283//cell proliferation;GO:0050796//regulation of insulin secret…	GO:0008603//cAMP-dependent protein kinase regulator activity;GO:0030552//cAMP binding;GO:0005515//protein binding;GO:0017034//Rap guanyl-nucleotide exchange factor activity;GO:0005085//guanyl-nucleotide exchange factor activity	K08014//Serotonergic synapse;Leukocyte transendothelial migration;Long-term potentiation
10412	0	164	47	168	184	0	17	0	0	0	65	0	NSA2;NSA2 ribosome biogenesis homolog (S. cerevisiae)	GO:0005730//nucleolus;GO:0030529//ribonucleoprotein complex	GO:0006364//rRNA processing	GO:0044822//poly(A) RNA binding	-
10413	0	22	2	65	104	6	0	0	21	0	13	0	YAP1;Yes-associated protein 1	GO:0016020//membrane;GO:0005829//cytosol;GO:0005667//transcription factor complex;GO:0005654//nucleoplasm;GO:0005737//cytoplasm;GO:0005634//nucleus	GO:0006974//cellular response to DNA damage stimulus;GO:0060242//contact inhibition;GO:0045944//positive regulation of transcription from RNA polymerase II promoter;GO:0048368//lateral mesoderm development;GO:0035019//somatic stem cell maintenance;GO:0030857//negative regulation of epithelial cell differentiation;GO:0030216//keratinocyte differentiation;GO:0071480//cellular response to gamma radi…	GO:0003682//chromatin binding;GO:0003714//transcription corepressor activity;GO:0003713//transcription coactivator activity;GO:0044212//transcription regulatory region DNA binding;GO:0070064//proline-rich region binding;GO:0001076//RNA polymerase II transcription factor binding transcription factor activity;GO:0005515//protein binding	K10591//Endocytosis;Epstein-Barr virus infection;Ubiquitin mediated proteolysis;K05632//Ubiquitin mediated proteolysis;Endocytosis;K05633//Ubiquitin mediated proteolysis;Endocytosis;K13305//Ubiquitin mediated proteolysis;Aldosterone-regulated sodium reabsorption;Endocytosis
10417	0	31	46	21	29	0	0	36	51	0	173	1	SPON2;spondin 2, extracellular matrix protein	GO:0070062//extracellular vesicular exosome;GO:0005578//proteinaceous extracellular matrix	GO:0045087//innate immune response;GO:0007155//cell adhesion;GO:0007411//axon guidance	GO:0046872//metal ion binding	K03995//Prion diseases;Systemic lupus erythematosus;Complement and coagulation cascades
10418	0	0	0	0	0	42	13	7	66	0	3	0	SPON1;spondin 1, extracellular matrix protein	GO:0005615//extracellular space;GO:0031012//extracellular matrix;GO:0005578//proteinaceous extracellular matrix	GO:0007155//cell adhesion	GO:0005515//protein binding	K04596//p53 signaling pathway
10419	0	52	25	20	19	10	0	130	35	0	0	0	PRMT5;protein arginine methyltransferase 5	GO:0005737//cytoplasm;GO:0005634//nucleus;GO:0034709//methylosome;GO:0005829//cytosol	GO:0008283//cell proliferation;GO:0034660//ncRNA metabolic process;GO:0032922//circadian regulation of gene expression;GO:0006351//transcription, DNA-templated;GO:0000387//spliceosomal snRNP assembly;GO:0000122//negative regulation of transcription from RNA polymerase II promoter;GO:0043985//histone H4-R3 methylation;GO:0010467//gene expression;GO:0042118//endothelial cell activation;GO:0019918//…	GO:0008168//methyltransferase activity;GO:0005515//protein binding;GO:0035243//protein-arginine omega-N symmetric methyltransferase activity;GO:0043021//ribonucleoprotein complex binding;GO:0008469//histone-arginine N-methyltransferase activity;GO:0003714//transcription corepressor activity;GO:0003682//chromatin binding;GO:0001046//core promoter sequence-specific DNA binding	K02516//RNA transport;Cell cycle - yeast
10420	0	0	2	8	153	0	37	0	43	0	1	0	TESK2;testis-specific kinase 2	GO:0005634//nucleus;GO:0005737//cytoplasm;GO:0005730//nucleolus	GO:0030036//actin cytoskeleton organization;GO:0048041//focal adhesion assembly;GO:0006468//protein phosphorylation;GO:0018108//peptidyl-tyrosine phosphorylation;GO:0007283//spermatogenesis	GO:0004712//protein serine/threonine/tyrosine kinase activity;GO:0004674//protein serine/threonine kinase activity;GO:0004672//protein kinase activity;GO:0046872//metal ion binding;GO:0005515//protein binding;GO:0005524//ATP binding;GO:0004713//protein tyrosine kinase activity	-
10421	0	1	0	5	47	24	26	0	30	0	0	0	CD2BP2;CD2 (cytoplasmic tail) binding protein 2	GO:0016607//nuclear speck;GO:0005730//nucleolus;GO:0046540//U4/U6 x U5 tri-snRNP complex;GO:0005682//U5 snRNP;GO:0005654//nucleoplasm;GO:0005737//cytoplasm;GO:0005634//nucleus	GO:0008380//RNA splicing;GO:0010467//gene expression;GO:0000244//spliceosomal tri-snRNP complex assembly;GO:0000398//mRNA splicing, via spliceosome;GO:0010923//negative regulation of phosphatase activity	GO:0005515//protein binding;GO:0043021//ribonucleoprotein complex binding	-
10422	0	0	0	0	0	17	9	82	34	0	0	0	UBAC1;UBA domain containing 1	GO:0005886//plasma membrane;GO:0070062//extracellular vesicular exosome;GO:0005794//Golgi apparatus;GO:0005737//cytoplasm	GO:0016567//protein ubiquitination	GO:0005515//protein binding	-
10423	0	0	28	0	1	0	0	27	0	0	0	0	CDIPT;CDP-diacylglycerol--inositol 3-phosphatidyltransferase	GO:0005789//endoplasmic reticulum membrane;GO:0005886//plasma membrane;GO:0016020//membrane;GO:0016021//integral component of membrane;GO:0000139//Golgi membrane	GO:0006644//phospholipid metabolic process;GO:0046474//glycerophospholipid biosynthetic process;GO:0046341//CDP-diacylglycerol metabolic process;GO:0006661//phosphatidylinositol biosynthetic process;GO:0044281//small molecule metabolic process	GO:0003881//CDP-diacylglycerol-inositol 3-phosphatidyltransferase activity;GO:0030145//manganese ion binding;GO:0030246//carbohydrate binding;GO:0043178//alcohol binding;GO:0019992//diacylglycerol binding	K00999//Metabolic pathways;Phosphatidylinositol signaling system;Inositol phosphate metabolism;Glycerophospholipid metabolism
10424	1	113	1	5	28	20	10	0	16	0	0	0	PGRMC2;progesterone receptor membrane component 2	GO:0016021//integral component of membrane;GO:0016020//membrane	GO:0043401//steroid hormone mediated signaling pathway	GO:0003707//steroid hormone receptor activity;GO:0020037//heme binding;GO:0005496//steroid binding	-
10425	0	0	0	9	67	19	0	0	12	0	19	0	ARIH2;ariadne RBR E3 ubiquitin protein ligase 2	GO:0005634//nucleus;GO:0005737//cytoplasm	GO:0071425//hematopoietic stem cell proliferation;GO:0042787//protein ubiquitination involved in ubiquitin-dependent protein catabolic process;GO:0048588//developmental cell growth;GO:0000209//protein polyubiquitination;GO:0007275//multicellular organismal development;GO:0070936//protein K48-linked ubiquitination;GO:0070534//protein K63-linked ubiquitination	GO:0003676//nucleic acid binding;GO:0016874//ligase activity;GO:0005515//protein binding;GO:0004842//ubiquitin-protein transferase activity;GO:0008270//zinc ion binding	-
10426	62	21	0	5	26	17	21	0	29	0	0	103	TUBGCP3;tubulin, gamma complex associated protein 3	GO:0016020//membrane;GO:0005814//centriole;GO:0005829//cytosol;GO:0005737//cytoplasm;GO:0005813//centrosome;GO:0005827//polar microtubule;GO:0005819//spindle	GO:0000278//mitotic cell cycle;GO:0000086//G2/M transition of mitotic cell cycle;GO:0007338//single fertilization;GO:0007020//microtubule nucleation	GO:0043015//gamma-tubulin binding;GO:0005200//structural constituent of cytoskeleton;GO:0005198//structural molecule activity;GO:0005515//protein binding	K01769//Purine metabolism
10427	0	0	0	0	1	0	0	0	0	0	0	0	SEC24B;SEC24 family member B	GO:0005829//cytosol;GO:0000139//Golgi membrane;GO:0016020//membrane;GO:0030127//COPII vesicle coat;GO:0005789//endoplasmic reticulum membrane;GO:0012507//ER to Golgi transport vesicle membrane;GO:0048471//perinuclear region of cytoplasm	GO:0006888//ER to Golgi vesicle-mediated transport;GO:0018279//protein N-linked glycosylation via asparagine;GO:0044281//small molecule metabolic process;GO:0016192//vesicle-mediated transport;GO:0060463//lung lobe morphogenesis;GO:0060088//auditory receptor cell stereocilium organization;GO:0021747//cochlear nucleus development;GO:0001843//neural tube closure;GO:0006886//intracellular protein tr…	GO:0005215//transporter activity;GO:0005515//protein binding;GO:0008270//zinc ion binding	K14007//Protein processing in endoplasmic reticulum
10428	0	0	0	14	13	0	0	0	0	229	0	0	CFDP1;craniofacial development protein 1	-	GO:0007155//cell adhesion;GO:0008360//regulation of cell shape;GO:0007275//multicellular organismal development;GO:2000270//negative regulation of fibroblast apoptotic process;GO:0042127//regulation of cell proliferation	-	-
1043	0	15	0	0	1	0	0	30	4	0	0	0	CD52;CD52 molecule	GO:0016020//membrane;GO:0005887//integral component of plasma membrane;GO:0031225//anchored component of membrane	GO:0045730//respiratory burst;GO:0007204//positive regulation of cytosolic calcium ion concentration	-	-
10430	0	0	0	0	0	15	32	0	0	0	0	0	TMEM147;transmembrane protein 147	GO:0005789//endoplasmic reticulum membrane;GO:0016021//integral component of membrane	-	-	-
10432	0	0	0	0	11	9	0	0	21	0	0	0	RBM14;RNA binding motif protein 14	GO:0016592//mediator complex;GO:0005634//nucleus;GO:0005667//transcription factor complex;GO:0005730//nucleolus;GO:0030529//ribonucleoprotein complex	GO:0030520//intracellular estrogen receptor signaling pathway;GO:0006366//transcription from RNA polymerase II promoter;GO:0016575//histone deacetylation;GO:0006260//DNA replication;GO:0042921//glucocorticoid receptor signaling pathway;GO:0045944//positive regulation of transcription from RNA polymerase II promoter;GO:0006281//DNA repair;GO:0009725//response to hormone;GO:0006310//DNA recombinati…	GO:0030374//ligand-dependent nuclear receptor transcription coactivator activity;GO:0030674//protein binding, bridging;GO:0044822//poly(A) RNA binding;GO:0000166//nucleotide binding;GO:0005515//protein binding;GO:0001104//RNA polymerase II transcription cofactor activity;GO:0003723//RNA binding	-
10434	0	72	0	28	79	19	0	0	3	0	25	0	LYPLA1;lysophospholipase I	GO:0070062//extracellular vesicular exosome;GO:0005829//cytosol;GO:0005739//mitochondrion	GO:0050999//regulation of nitric-oxide synthase activity;GO:0002084//protein depalmitoylation;GO:0006631//fatty acid metabolic process;GO:0046209//nitric oxide metabolic process;GO:0042997//negative regulation of Golgi to plasma membrane protein transport;GO:0044281//small molecule metabolic process	GO:0008474//palmitoyl-(protein) hydrolase activity;GO:0004622//lysophospholipase activity	K06128//Glycerophospholipid metabolism
10435	0	0	0	0	0	8	0	0	50	0	0	0	CDC42EP2;CDC42 effector protein (Rho GTPase binding) 2	GO:0016020//membrane;GO:0005886//plasma membrane;GO:0012505//endomembrane system;GO:0015630//microtubule cytoskeleton;GO:0005737//cytoplasm	GO:0007015//actin filament organization;GO:0031274//positive regulation of pseudopodium assembly;GO:0008360//regulation of cell shape;GO:0031334//positive regulation of protein complex assembly;GO:0030838//positive regulation of actin filament polymerization;GO:0030036//actin cytoskeleton organization;GO:0032321//positive regulation of Rho GTPase activity	GO:0001515//opioid peptide activity;GO:0017049//GTP-Rho binding;GO:0005515//protein binding;GO:0005100//Rho GTPase activator activity	-
10436	0	36	0	10	70	12	0	0	13	0	17	137	EMG1;EMG1 N1-specific pseudouridine methyltransferase	GO:0005737//cytoplasm;GO:0005634//nucleus;GO:0005730//nucleolus	GO:0031167//rRNA methylation;GO:0006364//rRNA processing;GO:0042274//ribosomal small subunit biogenesis	GO:0003723//RNA binding;GO:0070037//rRNA (pseudouridine) methyltransferase activity;GO:0019843//rRNA binding;GO:0044822//poly(A) RNA binding	K14568//Ribosome biogenesis in eukaryotes
10437	4	0	0	0	0	0	1	0	15	0	0	0	IFI30;interferon, gamma-inducible protein 30	GO:0043202//lysosomal lumen;GO:0005737//cytoplasm;GO:0005764//lysosome;GO:0030054//cell junction;GO:0005576//extracellular region;GO:0005886//plasma membrane;GO:0043231//intracellular membrane-bounded organelle	GO:0055114//oxidation-reduction process;GO:0019886//antigen processing and presentation of exogenous peptide antigen via MHC class II;GO:0050821//protein stabilization;GO:0019221//cytokine-mediated signaling pathway;GO:0042590//antigen processing and presentation of exogenous peptide antigen via MHC class I;GO:0048147//negative regulation of fibroblast proliferation;GO:0060333//interferon-gamma-m…	GO:0016667//oxidoreductase activity, acting on a sulfur group of donors	K08059//Antigen processing and presentation
10438	0	0	0	18	23	0	0	0	8	0	0	0	C1D;C1D nuclear receptor corepressor	GO:0005737//cytoplasm;GO:0005634//nucleus;GO:0000176//nuclear exosome (RNase complex);GO:0005730//nucleolus;GO:0017053//transcriptional repressor complex	GO:0045892//negative regulation of transcription, DNA-templated;GO:0006915//apoptotic process;GO:0006351//transcription, DNA-templated;GO:0000460//maturation of 5.8S rRNA	GO:0003714//transcription corepressor activity;GO:0003723//RNA binding;GO:0005515//protein binding;GO:0016922//ligand-dependent nuclear receptor binding;GO:0003677//DNA binding	K12592//RNA degradation
10439	0	0	0	0	0	1	0	51	13	0	0	0	OLFM1;olfactomedin 1	GO:0032281//alpha-amino-3-hydroxy-5-methyl-4-isoxazolepropionic acid selective glutamate receptor complex;GO:0030054//cell junction;GO:0045202//synapse;GO:0005615//extracellular space	GO:0007399//nervous system development;GO:1902430//negative regulation of beta-amyloid formation;GO:2001223//negative regulation of neuron migration;GO:0051259//protein oligomerization	GO:0001540//beta-amyloid binding;GO:0005515//protein binding	-
1044	0	0	0	0	0	0	0	0	19	0	0	0	CDX1;caudal type homeobox 1	GO:0005634//nucleus	GO:0009887//organ morphogenesis;GO:0045944//positive regulation of transcription from RNA polymerase II promoter;GO:0060349//bone morphogenesis;GO:0009952//anterior/posterior pattern specification	GO:0005515//protein binding;GO:0000980//RNA polymerase II distal enhancer sequence-specific DNA binding;GO:0001205//RNA polymerase II distal enhancer sequence-specific DNA binding transcription factor activity involved in positive regulation of transcription	-
10440	0	7	0	27	27	0	0	0	0	0	0	0	TIMM17A;translocase of inner mitochondrial membrane 17 homolog A (yeast)	GO:0005744//mitochondrial inner membrane presequence translocase complex;GO:0031305//integral component of mitochondrial inner membrane	GO:0006626//protein targeting to mitochondrion;GO:0071806//protein transmembrane transport;GO:0044267//cellular protein metabolic process	GO:0015450//P-P-bond-hydrolysis-driven protein transmembrane transporter activity	-
10443	0	0	0	80	56	20	0	0	1	0	0	0	N4BP2L2;NEDD4 binding protein 2-like 2	GO:0005737//cytoplasm;GO:0070062//extracellular vesicular exosome;GO:0017053//transcriptional repressor complex	GO:0000122//negative regulation of transcription from RNA polymerase II promoter;GO:1902037//negative regulation of hematopoietic stem cell differentiation;GO:1902035//positive regulation of hematopoietic stem cell proliferation	GO:0019899//enzyme binding;GO:0005515//protein binding;GO:0001106//RNA polymerase II transcription corepressor activity	-
10444	0	37	1	24	79	11	23	35	52	0	61	0	ZER1;zyg-11 related, cell cycle regulator	GO:0031462//Cul2-RING ubiquitin ligase complex	GO:0051438//regulation of ubiquitin-protein transferase activity;GO:0016567//protein ubiquitination	GO:0004842//ubiquitin-protein transferase activity	-
10445	0	0	0	0	14	0	33	37	32	0	1	0	MCRS1;microspherule protein 1	GO:0005654//nucleoplasm;GO:0071339//MLL1 complex;GO:0005737//cytoplasm;GO:0031011//Ino80 complex;GO:0005634//nucleus;GO:0000123//histone acetyltransferase complex;GO:0005730//nucleolus	GO:0006464//cellular protein modification process;GO:0043982//histone H4-K8 acetylation;GO:0006310//DNA recombination;GO:0043984//histone H4-K16 acetylation;GO:0006281//DNA repair;GO:0006355//regulation of transcription, DNA-templated;GO:0006351//transcription, DNA-templated;GO:0043981//histone H4-K5 acetylation;GO:0006325//chromatin organization	GO:0043996//histone acetyltransferase activity (H4-K8 specific);GO:0043995//histone acetyltransferase activity (H4-K5 specific);GO:0046972//histone acetyltransferase activity (H4-K16 specific);GO:0005515//protein binding	K11674//Herpes simplex infection
10446	114	0	0	0	0	36	14	0	11	0	13	1	LRRN2;leucine rich repeat neuronal 2	GO:0016021//integral component of membrane	GO:0007165//signal transduction;GO:0007155//cell adhesion	GO:0004872//receptor activity	K07523//Axon guidance
10447	0	46	2	1	43	0	20	0	0	0	0	0	FAM3C;family with sequence similarity 3, member C	GO:0070062//extracellular vesicular exosome;GO:0005576//extracellular region;GO:0005794//Golgi apparatus;GO:0016023//cytoplasmic membrane-bounded vesicle	GO:0007275//multicellular organismal development	GO:0005125//cytokine activity	K09666//Other types of O-glycan biosynthesis
10449	0	1	0	1	0	0	0	0	1	44	0	0	ACAA2;acetyl-CoA acyltransferase 2	GO:0005743//mitochondrial inner membrane;GO:0070062//extracellular vesicular exosome;GO:0005739//mitochondrion	GO:1901029//negative regulation of mitochondrial outer membrane permeabilization involved in apoptotic signaling pathway;GO:0071456//cellular response to hypoxia;GO:1902109//negative regulation of mitochondrial membrane permeability involved in apoptotic process;GO:0006631//fatty acid metabolic process;GO:0006695//cholesterol biosynthetic process	GO:0003988//acetyl-CoA C-acyltransferase activity;GO:0044822//poly(A) RNA binding;GO:0005515//protein binding	K07508//Fatty acid metabolism;Biosynthesis of secondary metabolites;Valine, leucine and isoleucine degradation;Metabolic pathways;Fatty acid elongation;Microbial metabolism in diverse environments;Benzoate degradation
1045	0	0	0	0	0	0	0	0	30	0	5	0	CDX2;caudal type homeobox 2	GO:0005634//nucleus;GO:0017053//transcriptional repressor complex;GO:0005730//nucleolus;GO:0000794//condensed nuclear chromosome	GO:0009887//organ morphogenesis;GO:0000122//negative regulation of transcription from RNA polymerase II promoter;GO:0045597//positive regulation of cell differentiation;GO:0060711//labyrinthine layer development;GO:0008333//endosome to lysosome transport;GO:0006366//transcription from RNA polymerase II promoter;GO:0045197//establishment or maintenance of epithelial cell apical/basal polarity;GO:0…	GO:0003714//transcription corepressor activity;GO:0003690//double-stranded DNA binding;GO:0043565//sequence-specific DNA binding;GO:0003700//sequence-specific DNA binding transcription factor activity	-
10450	0	0	0	0	1	0	29	0	28	0	11	0	PPIE;peptidylprolyl isomerase E (cyclophilin E)	GO:0071013//catalytic step 2 spliceosome;GO:0005634//nucleus	GO:0006355//regulation of transcription, DNA-templated;GO:0000413//protein peptidyl-prolyl isomerization;GO:0006457//protein folding;GO:0000398//mRNA splicing, via spliceosome;GO:0045070//positive regulation of viral genome replication	GO:0016018//cyclosporin A binding;GO:0003723//RNA binding;GO:0005515//protein binding;GO:0044822//poly(A) RNA binding;GO:0000166//nucleotide binding;GO:0003755//peptidyl-prolyl cis-trans isomerase activity	K09564//Spliceosome
10451	0	0	0	0	0	10	22	0	96	270	0	1	VAV3;vav 3 guanine nucleotide exchange factor	GO:0005886//plasma membrane;GO:0070062//extracellular vesicular exosome;GO:0005829//cytosol	GO:0051056//regulation of small GTPase mediated signal transduction;GO:0042493//response to drug;GO:0045087//innate immune response;GO:0048011//neurotrophin TRK receptor signaling pathway;GO:0007264//small GTPase mediated signal transduction;GO:0001525//angiogenesis;GO:0038096//Fc-gamma receptor signaling pathway involved in phagocytosis;GO:0009967//positive regulation of signal transduction;GO:0…	GO:0046872//metal ion binding;GO:0030676//Rac guanyl-nucleotide exchange factor activity;GO:0005515//protein binding;GO:0005096//GTPase activator activity;GO:0005070//SH3/SH2 adaptor activity;GO:0005085//guanyl-nucleotide exchange factor activity;GO:0005154//epidermal growth factor receptor binding	K05730//Focal adhesion;Natural killer cell mediated cytotoxicity;T cell receptor signaling pathway;Regulation of actin cytoskeleton;Fc gamma R-mediated phagocytosis;Leukocyte transendothelial migration;B cell receptor signaling pathway;Chemokine signaling pathway;Fc epsilon RI signaling pathway
10452	0	1	0	11	8	0	10	0	24	0	0	0	TOMM40;translocase of outer mitochondrial membrane 40 homolog (yeast)	GO:0031307//integral component of mitochondrial outer membrane;GO:0070062//extracellular vesicular exosome;GO:0005739//mitochondrion;GO:0016021//integral component of membrane;GO:0005742//mitochondrial outer membrane translocase complex;GO:0046930//pore complex	GO:0006626//protein targeting to mitochondrion;GO:0006811//ion transport;GO:0044267//cellular protein metabolic process;GO:0071806//protein transmembrane transport	GO:0015288//porin activity;GO:0008320//protein transmembrane transporter activity	K11518//Amyotrophic lateral sclerosis (ALS)
10454	88	1	0	5	1	0	55	0	14	104	5	1	TAB1;TGF-beta activated kinase 1/MAP3K7 binding protein 1	GO:0005730//nucleolus;GO:0010008//endosome membrane;GO:0005829//cytosol;GO:0005634//nucleus;GO:0005737//cytoplasm;GO:0043234//protein complex	GO:0038124//toll-like receptor TLR6:TLR2 signaling pathway;GO:0051403//stress-activated MAPK cascade;GO:0034142//toll-like receptor 4 signaling pathway;GO:0034146//toll-like receptor 5 signaling pathway;GO:0000187//activation of MAPK activity;GO:0002224//toll-like receptor signaling pathway;GO:0034166//toll-like receptor 10 signaling pathway;GO:0034138//toll-like receptor 3 signaling pathway;GO:0…	GO:0019209//kinase activator activity;GO:0032403//protein complex binding;GO:0003824//catalytic activity;GO:0008047//enzyme activator activity;GO:0048273//mitogen-activated protein kinase p38 binding;GO:0005515//protein binding	K04403//NF-kappa B signaling pathway;NOD-like receptor signaling pathway;Toll-like receptor signaling pathway;Osteoclast differentiation;Toxoplasmosis;Leishmaniasis;MAPK signaling pathway;Herpes simplex infection;Epstein-Barr virus infection
10455	0	88	0	37	58	4	0	0	0	0	0	37	ECI2;enoyl-CoA delta isomerase 2	GO:0005782//peroxisomal matrix;GO:0005634//nucleus;GO:0043231//intracellular membrane-bounded organelle;GO:0005739//mitochondrion;GO:0016020//membrane;GO:0005730//nucleolus	GO:0009062//fatty acid catabolic process;GO:0008152//metabolic process	GO:0004165//dodecenoyl-CoA delta-isomerase activity;GO:0000062//fatty-acyl-CoA binding;GO:0005102//receptor binding	K13239//Fatty acid metabolism;Peroxisome
10456	0	9	0	20	97	0	0	0	0	0	0	0	HAX1;HCLS1 associated protein X-1	GO:0016529//sarcoplasmic reticulum;GO:0005739//mitochondrion;GO:0015629//actin cytoskeleton;GO:0005635//nuclear envelope;GO:0005667//transcription factor complex;GO:0016023//cytoplasmic membrane-bounded vesicle;GO:0005783//endoplasmic reticulum;GO:0031965//nuclear membrane;GO:0030027//lamellipodium	GO:0014068//positive regulation of phosphatidylinositol 3-kinase signaling;GO:0033138//positive regulation of peptidyl-serine phosphorylation;GO:2000251//positive regulation of actin cytoskeleton reorganization;GO:0050731//positive regulation of peptidyl-tyrosine phosphorylation;GO:0042981//regulation of apoptotic process;GO:0051897//positive regulation of protein kinase B signaling;GO:0030833//r…	GO:0005515//protein binding;GO:0047485//protein N-terminus binding;GO:0019966//interleukin-1 binding	-
10457	0	0	0	0	0	0	0	0	52	0	0	0	GPNMB;glycoprotein (transmembrane) nmb	GO:0042470//melanosome;GO:0016021//integral component of membrane;GO:0005887//integral component of plasma membrane	GO:0001649//osteoblast differentiation;GO:0030282//bone mineralization;GO:0008285//negative regulation of cell proliferation;GO:0007155//cell adhesion	GO:0008201//heparin binding;GO:0005178//integrin binding	-
10458	0	55	0	0	5	32	64	76	99	0	2	0	BAIAP2;BAI1-associated protein 2	GO:0015629//actin cytoskeleton;GO:0005829//cytosol;GO:0005737//cytoplasm;GO:0001726//ruffle;GO:0043005//neuron projection;GO:0005886//plasma membrane;GO:0070062//extracellular vesicular exosome;GO:0030175//filopodium	GO:0032956//regulation of actin cytoskeleton organization;GO:0008360//regulation of cell shape;GO:0008286//insulin receptor signaling pathway;GO:0051764//actin crosslink formation;GO:0048167//regulation of synaptic plasticity;GO:0016358//dendrite development;GO:0051017//actin filament bundle assembly;GO:0046847//filopodium assembly;GO:0007409//axonogenesis;GO:0038096//Fc-gamma receptor signaling …	GO:0008022//protein C-terminus binding;GO:0008093//cytoskeletal adaptor activity;GO:0070064//proline-rich region binding;GO:0005515//protein binding;GO:0042802//identical protein binding;GO:0017124//SH3 domain binding	K05627//Regulation of actin cytoskeleton;Adherens junction
10459	0	0	0	0	3	0	0	5	29	0	10	0	MAD2L2;MAD2 mitotic arrest deficient-like 2 (yeast)	GO:0005737//cytoplasm;GO:0005634//nucleus;GO:0005819//spindle;GO:0005654//nucleoplasm;GO:0016035//zeta DNA polymerase complex;GO:0005680//anaphase-promoting complex	GO:0006302//double-strand break repair;GO:0007067//mitotic nuclear division;GO:2000048//negative regulation of cell-cell adhesion mediated by cadherin;GO:0006281//DNA repair;GO:0010719//negative regulation of epithelial to mesenchymal transition;GO:0042177//negative regulation of protein catabolic process;GO:0010944//negative regulation of transcription by competitive promoter binding;GO:0033138/…	GO:0001102//RNA polymerase II activating transcription factor binding;GO:0005515//protein binding;GO:0008432//JUN kinase binding	K13728//Progesterone-mediated oocyte maturation;Shigellosis;Cell cycle;Oocyte meiosis;Bacterial invasion of epithelial cells
10460	75	0	15	0	0	45	23	76	14	16	0	0	TACC3;transforming, acidic coiled-coil containing protein 3	GO:0005813//centrosome;GO:0005737//cytoplasm	GO:0032886//regulation of microtubule-based process;GO:0051726//regulation of cell cycle;GO:0042994//cytoplasmic sequestering of transcription factor;GO:0030097//hemopoiesis;GO:0001666//response to hypoxia;GO:0021987//cerebral cortex development;GO:0030953//astral microtubule organization;GO:0022027//interkinetic nuclear migration;GO:0022008//neurogenesis	GO:0005515//protein binding;GO:0019904//protein domain specific binding	K14283//RNA transport
10461	0	0	0	0	0	0	0	0	40	0	0	0	MERTK;MER proto-oncogene, tyrosine kinase	GO:0005737//cytoplasm;GO:0005887//integral component of plasma membrane;GO:0001750//photoreceptor outer segment;GO:0005886//plasma membrane;GO:0016028//rhabdomere;GO:0005615//extracellular space	GO:0051250//negative regulation of lymphocyte activation;GO:0043277//apoptotic cell clearance;GO:0018108//peptidyl-tyrosine phosphorylation;GO:0060068//vagina development;GO:0043491//protein kinase B signaling;GO:0007267//cell-cell signaling;GO:0007596//blood coagulation;GO:0007166//cell surface receptor signaling pathway;GO:0007283//spermatogenesis;GO:0006468//protein phosphorylation;GO:0032940/…	GO:0005515//protein binding;GO:0004714//transmembrane receptor protein tyrosine kinase activity;GO:0005524//ATP binding	-
10462	0	0	0	0	0	17	29	0	0	105	0	0	CLEC10A;C-type lectin domain family 10, member A	GO:0016021//integral component of membrane;GO:0005886//plasma membrane	GO:0045087//innate immune response;GO:0006897//endocytosis	GO:0030246//carbohydrate binding	-
10463	0	26	1	103	317	0	35	0	10	0	2	0	SLC30A9;solute carrier family 30 (zinc transporter), member 9	GO:0005856//cytoskeleton;GO:0005634//nucleus;GO:0016021//integral component of membrane	GO:0006829//zinc ion transport;GO:0006289//nucleotide-excision repair;GO:0006351//transcription, DNA-templated;GO:0045944//positive regulation of transcription from RNA polymerase II promoter	GO:0030374//ligand-dependent nuclear receptor transcription coactivator activity;GO:0003700//sequence-specific DNA binding transcription factor activity;GO:0016922//ligand-dependent nuclear receptor binding;GO:0008324//cation transmembrane transporter activity;GO:0003682//chromatin binding	-
10464	0	0	1	10	8	25	16	0	11	0	0	0	PIBF1;progesterone immunomodulatory binding factor 1	GO:0005813//centrosome	-	GO:0005515//protein binding	K10381//Arrhythmogenic right ventricular cardiomyopathy (ARVC)
10465	0	23	35	0	20	18	0	0	17	0	2	0	PPIH;peptidylprolyl isomerase H (cyclophilin H)	GO:0016607//nuclear speck;GO:0071001//U4/U6 snRNP;GO:0005681//spliceosomal complex;GO:0046540//U4/U6 x U5 tri-snRNP complex;GO:0005737//cytoplasm	GO:0006457//protein folding;GO:0000398//mRNA splicing, via spliceosome;GO:0045070//positive regulation of viral genome replication;GO:0006461//protein complex assembly;GO:0000413//protein peptidyl-prolyl isomerization	GO:0005515//protein binding;GO:0003755//peptidyl-prolyl cis-trans isomerase activity;GO:0043021//ribonucleoprotein complex binding;GO:0016018//cyclosporin A binding	K09567//Spliceosome
10466	0	458	360	559	750	0	63	88	60	0	313	1	COG5;component of oligomeric golgi complex 5	GO:0005794//Golgi apparatus;GO:0000139//Golgi membrane;GO:0016020//membrane;GO:0005829//cytosol;GO:0017119//Golgi transport complex	GO:0006891//intra-Golgi vesicle-mediated transport;GO:0015031//protein transport	GO:0005515//protein binding	-
10468	0	0	0	0	0	0	0	0	7	0	0	0	FST;follistatin	GO:0005576//extracellular region;GO:0005737//cytoplasm;GO:0005634//nucleus	GO:0002244//hematopoietic progenitor cell differentiation;GO:0051798//positive regulation of hair follicle development;GO:0031069//hair follicle morphogenesis;GO:0042475//odontogenesis of dentin-containing tooth;GO:0032926//negative regulation of activin receptor signaling pathway;GO:0000122//negative regulation of transcription from RNA polymerase II promoter;GO:0007389//pattern specification pr…	GO:0043395//heparan sulfate proteoglycan binding;GO:0004871//signal transducer activity;GO:0005515//protein binding;GO:0048185//activin binding	K04661//TGF-beta signaling pathway
10469	40	0	0	0	12	0	0	64	18	43	0	0	TIMM44;translocase of inner mitochondrial membrane 44 homolog (yeast)	GO:0005743//mitochondrial inner membrane;GO:0005739//mitochondrion;GO:0005759//mitochondrial matrix	GO:0071806//protein transmembrane transport;GO:0044267//cellular protein metabolic process;GO:0006626//protein targeting to mitochondrion	GO:0015450//P-P-bond-hydrolysis-driven protein transmembrane transporter activity;GO:0005515//protein binding;GO:0005524//ATP binding	-
1047	0	0	0	10	0	0	0	0	11	0	0	0	CLGN;calmegin	GO:0005783//endoplasmic reticulum;GO:0016021//integral component of membrane;GO:0005789//endoplasmic reticulum membrane;GO:0005635//nuclear envelope	GO:0006457//protein folding;GO:0007339//binding of sperm to zona pellucida;GO:0006461//protein complex assembly;GO:0007338//single fertilization	GO:0005509//calcium ion binding;GO:0051082//unfolded protein binding;GO:0044183//protein binding involved in protein folding	-
10472	0	0	0	0	25	0	0	0	18	3	0	0	ZBTB18;zinc finger and BTB domain containing 18	GO:0005730//nucleolus;GO:0045171//intercellular bridge;GO:0000228//nuclear chromosome;GO:0015630//microtubule cytoskeleton;GO:0005634//nucleus	GO:0001701//in utero embryonic development;GO:0021549//cerebellum development;GO:0051302//regulation of cell division;GO:0048666//neuron development;GO:0021766//hippocampus development;GO:0007519//skeletal muscle tissue development;GO:0045892//negative regulation of transcription, DNA-templated;GO:0021987//cerebral cortex development;GO:0006351//transcription, DNA-templated;GO:0000122//negative r…	GO:0003677//DNA binding;GO:0046872//metal ion binding;GO:0043565//sequence-specific DNA binding;GO:0003700//sequence-specific DNA binding transcription factor activity	-
10473	0	15	0	1	91	0	32	0	0	0	0	0	HMGN4;high mobility group nucleosomal binding domain 4	GO:0005634//nucleus;GO:0000785//chromatin	-	GO:0031492//nucleosomal DNA binding	-
10474	83	312	194	285	627	7	35	363	91	1	625	133	TADA3;transcriptional adaptor 3	GO:0005634//nucleus;GO:0005671//Ada2/Gcn5/Ada3 transcription activator complex;GO:0030914//STAGA complex;GO:0072686//mitotic spindle;GO:0005730//nucleolus;GO:0033276//transcription factor TFTC complex;GO:0005622//intracellular	GO:0030520//intracellular estrogen receptor signaling pathway;GO:0031063//regulation of histone deacetylation;GO:0090043//regulation of tubulin deacetylation;GO:0006351//transcription, DNA-templated;GO:0001932//regulation of protein phosphorylation;GO:0006325//chromatin organization;GO:0010628//positive regulation of gene expression;GO:0031647//regulation of protein stability;GO:0045893//positive…	GO:0003713//transcription coactivator activity;GO:0019904//protein domain specific binding;GO:0004402//histone acetyltransferase activity;GO:0030374//ligand-dependent nuclear receptor transcription coactivator activity;GO:0003700//sequence-specific DNA binding transcription factor activity;GO:0016922//ligand-dependent nuclear receptor binding;GO:0005515//protein binding	-
10475	0	34	0	55	75	44	0	0	5	0	0	0	TRIM38;tripartite motif containing 38	GO:0005622//intracellular	GO:0032648//regulation of interferon-beta production;GO:0070936//protein K48-linked ubiquitination;GO:0051091//positive regulation of sequence-specific DNA binding transcription factor activity;GO:0046598//positive regulation of viral entry into host cell;GO:0051092//positive regulation of NF-kappaB transcription factor activity;GO:0043123//positive regulation of I-kappaB kinase/NF-kappaB signali…	GO:0004871//signal transducer activity;GO:0008270//zinc ion binding	-
10476	0	51	0	11	100	0	14	0	0	0	0	0	ATP5H;ATP synthase, H+ transporting, mitochondrial Fo complex, subunit d	GO:0000276//mitochondrial proton-transporting ATP synthase complex, coupling factor F(o);GO:0005753//mitochondrial proton-transporting ATP synthase complex;GO:0005739//mitochondrion;GO:0005743//mitochondrial inner membrane;GO:0070062//extracellular vesicular exosome	GO:0022904//respiratory electron transport chain;GO:0044281//small molecule metabolic process;GO:0006200//ATP catabolic process;GO:0042776//mitochondrial ATP synthesis coupled proton transport;GO:0044237//cellular metabolic process	GO:0022857//transmembrane transporter activity;GO:0016887//ATPase activity;GO:0015078//hydrogen ion transmembrane transporter activity	K02138//Metabolic pathways;Huntington's disease;Alzheimer's disease;Parkinson's disease;Oxidative phosphorylation
10477	0	0	0	0	5	0	19	3	0	0	0	0	UBE2E3;ubiquitin-conjugating enzyme E2E 3	GO:0005737//cytoplasm;GO:0005634//nucleus	GO:0070534//protein K63-linked ubiquitination;GO:0070936//protein K48-linked ubiquitination;GO:0040008//regulation of growth;GO:0070979//protein K11-linked ubiquitination	GO:0005524//ATP binding;GO:0016881//acid-amino acid ligase activity;GO:0004842//ubiquitin-protein transferase activity	K06689//Shigellosis;Ubiquitin mediated proteolysis;Protein processing in endoplasmic reticulum
10478	0	21	0	0	31	0	0	0	25	0	13	0	SLC25A17;solute carrier family 25 (mitochondrial carrier; peroxisomal membrane protein, 34kDa), member 17	GO:0005739//mitochondrion;GO:0016020//membrane;GO:0043231//intracellular membrane-bounded organelle;GO:0005778//peroxisomal membrane;GO:0005779//integral component of peroxisomal membrane;GO:0005777//peroxisome	GO:0044255//cellular lipid metabolic process;GO:0015866//ADP transport;GO:0035349//coenzyme A transmembrane transport;GO:0044281//small molecule metabolic process;GO:1901679//nucleotide transmembrane transport;GO:0006635//fatty acid beta-oxidation;GO:0080121//AMP transport;GO:0015867//ATP transport;GO:0043132//NAD transport;GO:0001561//fatty acid alpha-oxidation;GO:0015908//fatty acid transport;G…	GO:0080122//AMP transmembrane transporter activity;GO:0005515//protein binding;GO:0051087//chaperone binding;GO:0051724//NAD transporter activity;GO:0015228//coenzyme A transmembrane transporter activity;GO:0044610//FMN transmembrane transporter activity;GO:0005347//ATP transmembrane transporter activity;GO:0015230//FAD transmembrane transporter activity;GO:0015217//ADP transmembrane transporter …	K13354//Peroxisome
10479	0	0	0	0	0	14	2	0	47	46	0	0	SLC9A6;solute carrier family 9, subfamily A (NHE6, cation proton antiporter 6), member 6	GO:0043679//axon terminus;GO:0031410//cytoplasmic vesicle;GO:0005886//plasma membrane;GO:0030425//dendrite;GO:0045202//synapse;GO:0016021//integral component of membrane;GO:0005770//late endosome;GO:0005789//endoplasmic reticulum membrane;GO:0055038//recycling endosome membrane;GO:0005739//mitochondrion;GO:0031901//early endosome membrane	GO:0006885//regulation of pH;GO:0048812//neuron projection morphogenesis;GO:0097484//dendrite extension;GO:1902600//hydrogen ion transmembrane transport;GO:0051386//regulation of neurotrophin TRK receptor signaling pathway;GO:0031547//brain-derived neurotrophic factor receptor signaling pathway;GO:0050808//synapse organization;GO:0035725//sodium ion transmembrane transport;GO:0055085//transmembra…	GO:0015385//sodium:proton antiporter activity	K12041//Cardiac muscle contraction
1048	0	0	0	0	0	0	2	61	13	0	2	0	CEACAM5;carcinoembryonic antigen-related cell adhesion molecule 5	GO:0031225//anchored component of membrane;GO:0071575//integral component of external side of plasma membrane;GO:0005887//integral component of plasma membrane;GO:0070062//extracellular vesicular exosome;GO:0016323//basolateral plasma membrane	GO:2000811//negative regulation of anoikis;GO:0010832//negative regulation of myotube differentiation;GO:0043066//negative regulation of apoptotic process;GO:0034109//homotypic cell-cell adhesion	GO:0042803//protein homodimerization activity;GO:0042802//identical protein binding;GO:0034235//GPI anchor binding	-
10480	0	42	0	36	69	0	4	3	49	0	0	0	EIF3M;eukaryotic translation initiation factor 3, subunit M	GO:0016282//eukaryotic 43S preinitiation complex;GO:0071541//eukaryotic translation initiation factor 3 complex, eIF3m;GO:0005852//eukaryotic translation initiation factor 3 complex;GO:0033290//eukaryotic 48S preinitiation complex	GO:0006446//regulation of translational initiation;GO:0001731//formation of translation preinitiation complex;GO:0002183//cytoplasmic translational initiation;GO:0006413//translational initiation	GO:0031369//translation initiation factor binding;GO:0005515//protein binding;GO:0003743//translation initiation factor activity	-
10481	0	172	1	64	273	10	20	2	9	0	0	0	HOXB13;homeobox B13	GO:0005667//transcription factor complex;GO:0005634//nucleus;GO:0005730//nucleolus	GO:0060527//prostate epithelial cord arborization involved in prostate glandular acinus morphogenesis;GO:0060743//epithelial cell maturation involved in prostate gland development;GO:0009611//response to wounding;GO:0006355//regulation of transcription, DNA-templated;GO:0001525//angiogenesis;GO:0008544//epidermis development;GO:0006351//transcription, DNA-templated;GO:0040008//regulation of growt…	GO:0043565//sequence-specific DNA binding	-
10482	0	0	0	0	1	5	31	0	25	0	12	30	NXF1;nuclear RNA export factor 1	GO:0042405//nuclear inclusion body;GO:0005829//cytosol;GO:0016607//nuclear speck;GO:0000346//transcription export complex;GO:0005643//nuclear pore;GO:0005654//nucleoplasm	GO:0016973//poly(A)+ mRNA export from nucleus;GO:0010467//gene expression;GO:0006406//mRNA export from nucleus;GO:0016032//viral process	GO:0005487//nucleocytoplasmic transporter activity;GO:0000166//nucleotide binding;GO:0044822//poly(A) RNA binding;GO:0005515//protein binding;GO:0003729//mRNA binding	K14284//Influenza A;Ribosome biogenesis in eukaryotes;mRNA surveillance pathway;RNA transport;Herpes simplex infection
10483	94	131	2	39	240	45	38	8	49	0	3	0	SEC23B;Sec23 homolog B (S. cerevisiae)	GO:0000139//Golgi membrane;GO:0016020//membrane;GO:0012505//endomembrane system;GO:0033116//endoplasmic reticulum-Golgi intermediate compartment membrane;GO:0043231//intracellular membrane-bounded organelle;GO:0030127//COPII vesicle coat;GO:0005789//endoplasmic reticulum membrane;GO:0048471//perinuclear region of cytoplasm	GO:0016192//vesicle-mediated transport;GO:0006888//ER to Golgi vesicle-mediated transport;GO:0006886//intracellular protein transport	GO:0008270//zinc ion binding	K14006//Protein processing in endoplasmic reticulum
10484	6	0	0	12	62	10	30	0	36	39	0	0	SEC23A;Sec23 homolog A (S. cerevisiae)	GO:0005829//cytosol;GO:0030127//COPII vesicle coat;GO:0005789//endoplasmic reticulum membrane;GO:0012507//ER to Golgi transport vesicle membrane;GO:0048471//perinuclear region of cytoplasm;GO:0030868//smooth endoplasmic reticulum membrane;GO:0005783//endoplasmic reticulum;GO:0000139//Golgi membrane	GO:0061024//membrane organization;GO:0044267//cellular protein metabolic process;GO:0019886//antigen processing and presentation of exogenous peptide antigen via MHC class II;GO:0044281//small molecule metabolic process;GO:0048208//COPII vesicle coating;GO:0006886//intracellular protein transport;GO:0018279//protein N-linked glycosylation via asparagine;GO:0006888//ER to Golgi vesicle-mediated tr…	GO:0008270//zinc ion binding;GO:0005515//protein binding	K14006//Protein processing in endoplasmic reticulum
10486	0	0	0	0	0	0	0	0	54	296	2	0	CAP2;CAP, adenylate cyclase-associated protein, 2 (yeast)	GO:0005886//plasma membrane	GO:0007163//establishment or maintenance of cell polarity;GO:0007010//cytoskeleton organization;GO:0007411//axon guidance;GO:0007165//signal transduction;GO:0007190//activation of adenylate cyclase activity	GO:0003779//actin binding	-
10487	0	84	1	112	210	4	3	0	1	0	0	0	CAP1;CAP, adenylate cyclase-associated protein 1 (yeast)	GO:0005886//plasma membrane;GO:0070062//extracellular vesicular exosome;GO:0005925//focal adhesion;GO:0030864//cortical actin cytoskeleton	GO:0030036//actin cytoskeleton organization;GO:0007190//activation of adenylate cyclase activity;GO:0007596//blood coagulation;GO:0006898//receptor-mediated endocytosis;GO:0007411//axon guidance;GO:0002576//platelet degranulation;GO:0007163//establishment or maintenance of cell polarity;GO:0007165//signal transduction;GO:0030168//platelet activation;GO:0001667//ameboidal cell migration	GO:0003779//actin binding	-
10488	63	128	28	16	147	0	0	22	29	0	8	0	CREB3;cAMP responsive element binding protein 3	GO:0005829//cytosol;GO:0005634//nucleus;GO:0005789//endoplasmic reticulum membrane;GO:0005794//Golgi apparatus;GO:0005783//endoplasmic reticulum;GO:0016020//membrane;GO:0016021//integral component of membrane;GO:0000139//Golgi membrane;GO:0043025//neuronal cell body;GO:0030176//integral component of endoplasmic reticulum membrane;GO:0005737//cytoplasm;GO:0016604//nuclear body	GO:0006351//transcription, DNA-templated;GO:0050930//induction of positive chemotaxis;GO:0051928//positive regulation of calcium ion transport;GO:0090026//positive regulation of monocyte chemotaxis;GO:0030335//positive regulation of cell migration;GO:0042994//cytoplasmic sequestering of transcription factor;GO:0090045//positive regulation of deacetylase activity;GO:0045893//positive regulation of…	GO:0031726//CCR1 chemokine receptor binding;GO:0000977//RNA polymerase II regulatory region sequence-specific DNA binding;GO:0003700//sequence-specific DNA binding transcription factor activity;GO:0042803//protein homodimerization activity;GO:0005515//protein binding;GO:0000982//RNA polymerase II core promoter proximal region sequence-specific DNA binding transcription factor activity;GO:0001077/…	K09048//Melanogenesis;Amphetamine addiction;Vasopressin-regulated water reabsorption;Prostate cancer;Alcoholism;Dopaminergic synapse;Cocaine addiction;Huntington's disease;Cholinergic synapse
10489	1	5	0	2	50	0	0	0	34	0	0	0	LRRC41;leucine rich repeat containing 41	GO:0016020//membrane	GO:0016567//protein ubiquitination	-	-
10490	1	567	204	641	1093	1	89	4875	441	255	1337	3	VTI1B;vesicle transport through interaction with t-SNAREs 1B	GO:0005765//lysosomal membrane;GO:0043025//neuronal cell body;GO:0008021//synaptic vesicle;GO:0016021//integral component of membrane;GO:0005794//Golgi apparatus;GO:0031201//SNARE complex;GO:0048471//perinuclear region of cytoplasm;GO:0031902//late endosome membrane	GO:0008283//cell proliferation;GO:0016192//vesicle-mediated transport;GO:0061025//membrane fusion;GO:0006904//vesicle docking involved in exocytosis;GO:0000046//autophagic vacuole fusion;GO:0006886//intracellular protein transport	GO:0000149//SNARE binding	K11152//Retinol metabolism;Metabolic pathways;K08493//SNARE interactions in vesicular transport
10491	11	37	0	9	42	8	19	0	16	0	0	0	CRTAP;cartilage associated protein	GO:0005783//endoplasmic reticulum;GO:0005615//extracellular space;GO:0005788//endoplasmic reticulum lumen;GO:0005578//proteinaceous extracellular matrix;GO:0032991//macromolecular complex	GO:0007283//spermatogenesis;GO:0018400//peptidyl-proline hydroxylation to 3-hydroxy-L-proline;GO:0061077//chaperone-mediated protein folding;GO:0050821//protein stabilization;GO:1901874//negative regulation of post-translational protein modification;GO:0030198//extracellular matrix organization	GO:0032403//protein complex binding	-
10492	0	89	3	124	517	0	20	72	26	30	0	0	SYNCRIP;synaptotagmin binding, cytoplasmic RNA interacting protein	GO:0030529//ribonucleoprotein complex;GO:0016020//membrane;GO:0071013//catalytic step 2 spliceosome;GO:0005783//endoplasmic reticulum;GO:0097452//GAIT complex;GO:0005654//nucleoplasm;GO:0005634//nucleus;GO:0070937//CRD-mediated mRNA stability complex;GO:0071204//histone pre-mRNA 3'end processing complex	GO:0001649//osteoblast differentiation;GO:0006396//RNA processing;GO:0016032//viral process;GO:0071346//cellular response to interferon-gamma;GO:0017148//negative regulation of translation;GO:0000398//mRNA splicing, via spliceosome;GO:0008380//RNA splicing;GO:0070934//CRD-mediated mRNA stabilization	GO:0044822//poly(A) RNA binding;GO:0005515//protein binding;GO:0000166//nucleotide binding;GO:0008143//poly(A) binding;GO:0003723//RNA binding	-
10493	0	8	1	5	60	17	1	0	13	0	0	0	VAT1;vesicle amine transport 1	GO:0005741//mitochondrial outer membrane;GO:0070062//extracellular vesicular exosome;GO:0016021//integral component of membrane	GO:0055114//oxidation-reduction process;GO:0010637//negative regulation of mitochondrial fusion	GO:0008270//zinc ion binding;GO:0016491//oxidoreductase activity	K10133//p53 signaling pathway;K00344//Metabolic pathways;Tyrosine metabolism;Naphthalene degradation;Chloroalkane and chloroalkene degradation;Fatty acid metabolism;Microbial metabolism in diverse environments;Glycolysis / Gluconeogenesis;Biosynthesis of secondary metabolites
10494	99	62	0	11	64	15	0	1	12	0	18	0	STK25;serine/threonine kinase 25	GO:0070062//extracellular vesicular exosome;GO:0005794//Golgi apparatus	GO:0050772//positive regulation of axonogenesis;GO:0051645//Golgi localization;GO:0007165//signal transduction;GO:0006468//protein phosphorylation;GO:0007163//establishment or maintenance of cell polarity;GO:0006979//response to oxidative stress	GO:0005524//ATP binding;GO:0042803//protein homodimerization activity;GO:0004672//protein kinase activity;GO:0005515//protein binding;GO:0046872//metal ion binding;GO:0004674//protein serine/threonine kinase activity	-
10495	0	42	0	7	0	20	17	0	21	0	0	0	ENOX2;ecto-NOX disulfide-thiol exchanger 2	GO:0005829//cytosol;GO:0005615//extracellular space;GO:0009897//external side of plasma membrane	GO:0016049//cell growth;GO:0040008//regulation of growth;GO:0055114//oxidation-reduction process;GO:0007624//ultradian rhythm	GO:0003676//nucleic acid binding;GO:0000166//nucleotide binding;GO:0015035//protein disulfide oxidoreductase activity	-
10497	1	215	41	89	320	0	50	62	123	92	28	444	UNC13B;unc-13 homolog B (C. elegans)	GO:0005829//cytosol;GO:0043195//terminal bouton;GO:0048786//presynaptic active zone;GO:0005886//plasma membrane;GO:0005794//Golgi apparatus;GO:0031594//neuromuscular junction;GO:0030054//cell junction;GO:0005737//cytoplasm	GO:0016082//synaptic vesicle priming;GO:0035556//intracellular signal transduction;GO:0007588//excretion;GO:0016081//synaptic vesicle docking involved in exocytosis;GO:0035249//synaptic transmission, glutamatergic;GO:0060384//innervation;GO:0006915//apoptotic process;GO:0097151//positive regulation of inhibitory postsynaptic membrane potential;GO:0007528//neuromuscular junction development;GO:004…	GO:0004872//receptor activity;GO:0019992//diacylglycerol binding;GO:0005515//protein binding;GO:0046872//metal ion binding;GO:0004871//signal transducer activity	K15293//Synaptic vesicle cycle
10498	0	16	0	44	50	0	0	0	46	0	40	0	CARM1;coactivator-associated arginine methyltransferase 1	GO:0005829//cytosol;GO:0005654//nucleoplasm;GO:0005634//nucleus;GO:0005737//cytoplasm	GO:0033146//regulation of intracellular estrogen receptor signaling pathway;GO:0051591//response to cAMP;GO:0016032//viral process;GO:0003420//regulation of growth plate cartilage chondrocyte proliferation;GO:0045600//positive regulation of fat cell differentiation;GO:0006351//transcription, DNA-templated;GO:0034971//histone H3-R17 methylation;GO:0019919//peptidyl-arginine methylation, to asymmet…	GO:0042054//histone methyltransferase activity;GO:0042803//protein homodimerization activity;GO:0005515//protein binding;GO:0044212//transcription regulatory region DNA binding;GO:0016274//protein-arginine N-methyltransferase activity;GO:0030374//ligand-dependent nuclear receptor transcription coactivator activity;GO:0070577//lysine-acetylated histone binding;GO:0035642//histone methyltransferase…	-
10499	0	47	0	68	160	38	25	48	71	0	0	0	NCOA2;nuclear receptor coactivator 2	GO:0005737//cytoplasm;GO:0005654//nucleoplasm	GO:0006351//transcription, DNA-templated;GO:0000122//negative regulation of transcription from RNA polymerase II promoter;GO:0010906//regulation of glucose metabolic process;GO:0045944//positive regulation of transcription from RNA polymerase II promoter;GO:0044255//cellular lipid metabolic process;GO:0016573//histone acetylation;GO:2000273//positive regulation of receptor activity;GO:0007165//si…	GO:0004402//histone acetyltransferase activity;GO:0004871//signal transducer activity;GO:0030374//ligand-dependent nuclear receptor transcription coactivator activity;GO:0016922//ligand-dependent nuclear receptor binding;GO:0046983//protein dimerization activity;GO:0003713//transcription coactivator activity;GO:0035257//nuclear hormone receptor binding;GO:0003682//chromatin binding;GO:0030375//th…	-
105	12	0	1	0	0	0	1	0	77	12	14	0	ADARB2;adenosine deaminase, RNA-specific, B2 (non-functional)	GO:0005634//nucleus	GO:0006397//mRNA processing	GO:0003725//double-stranded RNA binding;GO:0003727//single-stranded RNA binding;GO:0004000//adenosine deaminase activity;GO:0044822//poly(A) RNA binding;GO:0046872//metal ion binding	-
1050	0	0	0	15	2	20	0	0	11	0	16	0	CEBPA;CCAAT/enhancer binding protein (C/EBP), alpha	GO:0035189//Rb-E2F complex;GO:0016363//nuclear matrix;GO:0005634//nucleus	GO:0016032//viral process;GO:0045944//positive regulation of transcription from RNA polymerase II promoter;GO:0045600//positive regulation of fat cell differentiation;GO:0050872//white fat cell differentiation;GO:0048839//inner ear development;GO:0007005//mitochondrion organization;GO:0030099//myeloid cell differentiation;GO:0001892//embryonic placenta development;GO:0050873//brown fat cell diffe…	GO:0042803//protein homodimerization activity;GO:0046982//protein heterodimerization activity;GO:0003700//sequence-specific DNA binding transcription factor activity;GO:0005515//protein binding;GO:0008134//transcription factor binding;GO:0044212//transcription regulatory region DNA binding;GO:0001077//RNA polymerase II core promoter proximal region sequence-specific DNA binding transcription fact…	K09055//Transcriptional misregulation in cancer;Pathways in cancer;Acute myeloid leukemia
10500	0	33	0	9	0	0	0	104	22	0	0	0	SEMA6C;sema domain, transmembrane domain (TM), and cytoplasmic domain, (semaphorin) 6C	GO:0005886//plasma membrane;GO:0016021//integral component of membrane	GO:0007411//axon guidance	GO:0004872//receptor activity	K06842//Axon guidance
10501	0	0	0	0	0	19	21	0	66	13	1	0	SEMA6B;sema domain, transmembrane domain (TM), and cytoplasmic domain, (semaphorin) 6B	GO:0005886//plasma membrane;GO:0016021//integral component of membrane	GO:0030154//cell differentiation;GO:0007399//nervous system development	GO:0030215//semaphorin receptor binding;GO:0004872//receptor activity	K06842//Axon guidance
10505	0	0	0	0	10	69	0	0	23	0	0	327	SEMA4F;sema domain, immunoglobulin domain (Ig), transmembrane domain (TM) and short cytoplasmic domain, (semaphorin) 4F	GO:0005887//integral component of plasma membrane;GO:0005783//endoplasmic reticulum;GO:0045211//postsynaptic membrane;GO:0016020//membrane;GO:0005886//plasma membrane	GO:0007267//cell-cell signaling;GO:0030517//negative regulation of axon extension;GO:0007411//axon guidance;GO:0031290//retinal ganglion cell axon guidance;GO:0007399//nervous system development	GO:0004872//receptor activity	K06521//Axon guidance
10507	317	50	0	46	59	0	23	83	53	0	12	0	SEMA4D;sema domain, immunoglobulin domain (Ig), transmembrane domain (TM) and short cytoplasmic domain, (semaphorin) 4D	GO:0005887//integral component of plasma membrane;GO:0005615//extracellular space;GO:0005886//plasma membrane	GO:0007155//cell adhesion;GO:0001934//positive regulation of protein phosphorylation;GO:0010693//negative regulation of alkaline phosphatase activity;GO:0014068//positive regulation of phosphatidylinositol 3-kinase signaling;GO:0045668//negative regulation of osteoblast differentiation;GO:0007162//negative regulation of cell adhesion;GO:0048814//regulation of dendrite morphogenesis;GO:0031344//re…	GO:0005515//protein binding;GO:0004888//transmembrane signaling receptor activity;GO:0030215//semaphorin receptor binding;GO:0004872//receptor activity;GO:0005102//receptor binding	K06521//Axon guidance
10509	0	0	0	3	0	0	0	0	0	0	9	0	SEMA4B;sema domain, immunoglobulin domain (Ig), transmembrane domain (TM) and short cytoplasmic domain, (semaphorin) 4B	GO:0045202//synapse;GO:0005886//plasma membrane;GO:0016021//integral component of membrane	GO:0007399//nervous system development;GO:0030154//cell differentiation	GO:0004872//receptor activity	K06521//Axon guidance
1051	0	0	0	0	19	0	0	0	0	0	4	0	CEBPB;CCAAT/enhancer binding protein (C/EBP), beta	GO:0000779//condensed chromosome, centromeric region;GO:0005634//nucleus;GO:0000790//nuclear chromatin;GO:0005737//cytoplasm;GO:0016363//nuclear matrix;GO:0005654//nucleoplasm	GO:0045892//negative regulation of transcription, DNA-templated;GO:0030182//neuron differentiation;GO:0050873//brown fat cell differentiation;GO:0006366//transcription from RNA polymerase II promoter;GO:0001892//embryonic placenta development;GO:0045600//positive regulation of fat cell differentiation;GO:0045944//positive regulation of transcription from RNA polymerase II promoter;GO:0006954//inf…	GO:0003677//DNA binding;GO:0043565//sequence-specific DNA binding;GO:0003682//chromatin binding;GO:0008134//transcription factor binding;GO:0035259//glucocorticoid receptor binding;GO:0005515//protein binding;GO:0003700//sequence-specific DNA binding transcription factor activity;GO:0046982//protein heterodimerization activity;GO:0042803//protein homodimerization activity;GO:0003705//RNA polymera…	K10048//Transcriptional misregulation in cancer;Tuberculosis
10512	0	16	1	19	77	50	3	1	88	114	14	0	SEMA3C;sema domain, immunoglobulin domain (Ig), short basic domain, secreted, (semaphorin) 3C	GO:0070062//extracellular vesicular exosome;GO:0016020//membrane;GO:0005615//extracellular space	GO:0001974//blood vessel remodeling;GO:0009791//post-embryonic development;GO:0001756//somitogenesis;GO:0021915//neural tube development;GO:0003151//outflow tract morphogenesis;GO:0042493//response to drug;GO:0007411//axon guidance;GO:0001755//neural crest cell migration;GO:0003215//cardiac right ventricle morphogenesis;GO:0003350//pulmonary myocardium development;GO:0060174//limb bud formation;G…	GO:0030215//semaphorin receptor binding;GO:0004872//receptor activity	K06840//Axon guidance
10513	0	58	1	43	144	4	9	79	67	0	0	0	APPBP2;amyloid beta precursor protein (cytoplasmic tail) binding protein 2	GO:0005875//microtubule associated complex;GO:0030659//cytoplasmic vesicle membrane;GO:0005634//nucleus;GO:0005737//cytoplasm;GO:0005874//microtubule	GO:0006886//intracellular protein transport;GO:0046907//intracellular transport;GO:0008152//metabolic process	GO:0003777//microtubule motor activity;GO:0005515//protein binding	K10407//Salmonella infection;K00939//Metabolic pathways;Biosynthesis of secondary metabolites;Pyrimidine metabolism;Purine metabolism
10514	0	0	0	0	0	39	15	1	44	77	10	0	MYBBP1A;MYB binding protein (P160) 1a	GO:0005634//nucleus;GO:0005737//cytoplasm;GO:0043231//intracellular membrane-bounded organelle;GO:0016020//membrane;GO:0005730//nucleolus;GO:0042564//NLS-dependent protein nuclear import complex	GO:0006261//DNA-dependent DNA replication;GO:0042149//cellular response to glucose starvation;GO:0006351//transcription, DNA-templated;GO:0045892//negative regulation of transcription, DNA-templated;GO:0006355//regulation of transcription, DNA-templated;GO:0072332//intrinsic apoptotic signaling pathway by p53 class mediator;GO:0022904//respiratory electron transport chain;GO:0071158//positive reg…	GO:0008134//transcription factor binding;GO:0044822//poly(A) RNA binding;GO:0043565//sequence-specific DNA binding;GO:0005515//protein binding;GO:0003887//DNA-directed DNA polymerase activity	-
10516	0	0	0	0	0	0	0	0	18	0	0	0	FBLN5;fibulin 5	GO:0005578//proteinaceous extracellular matrix;GO:0071953//elastic fiber;GO:0031012//extracellular matrix;GO:0005615//extracellular space;GO:0070062//extracellular vesicular exosome;GO:0005576//extracellular region	GO:2000121//regulation of removal of superoxide radicals;GO:0030198//extracellular matrix organization;GO:0001558//regulation of cell growth;GO:0007160//cell-matrix adhesion;GO:0034394//protein localization to cell surface;GO:0048251//elastic fiber assembly	GO:0008022//protein C-terminus binding;GO:0005509//calcium ion binding;GO:0005178//integrin binding;GO:0005515//protein binding	K08023//TGF-beta signaling pathway
10517	0	0	0	0	0	14	43	0	35	0	0	0	FBXW10;F-box and WD repeat domain containing 10	-	-	-	-
[truncated: 54,003 more rows]
