# Supplementary material for: LncRNAs induce oxidative stress and spermatogenesis by regulating endoplasmic reticulum genes and pathways
Source: Aging (Albany NY). 2021 May 6;13(10):13764–87. doi: 10.18632/aging.202971 (PMC8202879; doi:10.18632/aging.202971)
Supplement: Supplementary Table 21 [file aging-13-202971-s021.xls]

Supplementary Table 21. Other TF.
TransID	LocusID	Chr	Strand	Exon_Num	Start(0-based)	Exon_Size
TCONS_01985749	XLOC_1229913	chr2	+	1	11560963	280
TCONS_01231700	XLOC_847110	chr15	-	3	437,324,494,373,296,000,000,000	94,98,114
TCONS_01276848	XLOC_930838	chr16	+	2	23,105,512,311,237	91,195
TCONS_02769472	XLOC_2030468	chr5	+	1	148697509	255
TCONS_00833631	XLOC_514940	chr12	+	1	102725730	248
TCONS_01365074	XLOC_931667	chr16	+	2	4,640,534,846,414,240	232,116
TCONS_03610423	XLOC_2557803	chr8	+	1	1893058	464
TCONS_02000559	XLOC_1230580	chr2	+	1	61731103	303
TCONS_00686034	XLOC_374971	chr11	+	2	925,868,946,224	220,75
TCONS_02976961	XLOC_2030979	chr5	-	1	694306	352
TCONS_03451537	XLOC_2394535	chr7	+	1	104953137	269
TCONS_00754744	XLOC_514505	chr12	+	1	66059998	299
TCONS_00924398	XLOC_652012	chr13	-	1	49077060	358
TCONS_01484327	XLOC_1015560	chr17	+	2	7,965,121,579,652,630	260,72
TCONS_00686758	XLOC_376452	chr11	+	2	7,773,362,377,734,570	172,37
TCONS_01402839	XLOC_1013777	chr17	+	2	73,238,467,324,766	160,55
TCONS_02267648	XLOC_1622962	chr3	+	1	172919110	303
TCONS_02235328	XLOC_1622055	chr3	+	1	102181552	296
TCONS_02729417	XLOC_1830509	chr4	-	2	2,426,302,024,286,770	216,10
TCONS_01035472	XLOC_752973	chr14	+	2	5,028,758,450,288,220	108,139
TCONS_02768206	XLOC_2028132	chr4_gl000193_random	+	3	830,819,019,491,824	64,221,134
TCONS_00031412	XLOC_004721	chr1	-	1	15649629	1192
TCONS_01986159	XLOC_1231041	chr2	+	2	9,048,109,290,482,060	117,186
TCONS_03839749	XLOC_2835382	chrUn_gl000214	-	4	64,133,643,416,504,500,000	81,64,64,331
TCONS_03834810	XLOC_2712213	chr9	+	1	116892296	213
TCONS_01702336	XLOC_1229727	chr2	+	2	13,477,461,349,964	63,152
TCONS_02314100	XLOC_1623571	chr3	-	1	13125262	218
TCONS_02527199	XLOC_1831320	chr4	-	2	110,172,679,110,176,000	174,89
TCONS_01058042	XLOC_754855	chr14	-	1	75416260	273
TCONS_01404193	XLOC_1017300	chr17	-	2	6,609,354,766,096,690	69,158
TCONS_02749037	XLOC_1828250	chr4	+	1	8362074	213
TCONS_01021136	XLOC_755238	chr14	-	2	104,058,681,104,059,000	57,166
TCONS_01685175	XLOC_1178156	chr19	-	2	5,886,986,758,874,040	134,132
TCONS_01795749	XLOC_1231486	chr2	+	1	119736081	233
TCONS_01021121	XLOC_755207	chr14	-	1	102624490	246
TCONS_03311448	XLOC_2395075	chr7	+	1	147963683	384
TCONS_01534973	XLOC_1094060	chr18	+	1	70342997	311
TCONS_03839337	XLOC_2835387	chrUn_gl000214	-	3	120,932,127,484,133,000	2,422,291,347
TCONS_03032070	XLOC_2220970	chr6	-	2	146,276,445,146,285,000	45,235
TCONS_02064686	XLOC_1482973	chr20	+	1	13097498	498
TCONS_00885804	XLOC_515726	chr12	-	1	5103913	204
TCONS_03265466	XLOC_2395178	chr7	+	2	151,574,914,151,575,000	37,443
TCONS_01231372	XLOC_846487	chr15	+	1	91520468	203
TCONS_02259206	XLOC_1621602	chr3	+	1	52364642	331
TCONS_00377535	XLOC_236059	chr10	+	1	77115370	352
TCONS_02217449	XLOC_1585459	chr22	+	1	46665027	308
TCONS_00755616	XLOC_515057	chr12	+	1	109631700	264
TCONS_00029432	XLOC_000279	chr1	+	1	9252832	276
TCONS_02227765	XLOC_1585193	chr22	+	2	3,862,563,238,626,100	360,247
TCONS_01684351	XLOC_1176369	chr19	-	2	60,322,706,033,055	125,142
TCONS_00490991	XLOC_236335	chr10	+	1	94822172	240
TCONS_00858575	XLOC_515041	chr12	+	1	108821550	235
TCONS_02784035	XLOC_2030525	chr5	+	2	151,326,197,151,327,000	153,97
TCONS_01375760	XLOC_930970	chr16	+	2	49,948,114,998,559	155,64
TCONS_00001361	XLOC_004187	chr1	+	1	240807556	329
TCONS_01160514	XLOC_846214	chr15	+	3	797,232,947,972,364,000,000,000	184,137,10
TCONS_00757089	XLOC_516105	chr12	-	1	29908947	278
TCONS_02227947	XLOC_1585961	chr22	-	1	30328916	346
TCONS_01398336	XLOC_1015431	chr17	+	3	747,956,057,480,042,000,000,000	21,96,85
TCONS_02836869	XLOC_2030619	chr5	+	1	159461795	288
TCONS_02693982	XLOC_1829833	chr4	+	1	166131355	270
TCONS_03523964	XLOC_2559200	chr8	+	1	119372467	302
TCONS_00867277	XLOC_516984	chr12	-	1	92419659	313
TCONS_02311951	XLOC_1622106	chr3	+	1	109040784	449
TCONS_00326010	XLOC_237288	chr10	-	1	12147749	296
TCONS_03864457	XLOC_2838579	chrX	+	1	18648615	282
TCONS_02694272	XLOC_1830469	chr4	-	1	17491788	221
TCONS_04046077	XLOC_2993628	chrY	-	2	724,933,725,314	42,261
TCONS_03485768	XLOC_2559395	chr8	+	2	137,974,005,137,975,000	89,150
TCONS_01181991	XLOC_845782	chr15	+	1	56925905	231
TCONS_02133649	XLOC_1547993	chr21	-	2	4,426,320,444,264,820	187,92
TCONS_03686512	XLOC_2714438	chr9	-	2	132,239,845,132,241,000	60,150
TCONS_02836552	XLOC_2030427	chr5	+	1	145882349	343
TCONS_03077706	XLOC_2217828	chr6	+	1	57398798	312
TCONS_03442282	XLOC_2393405	chr7	+	1	30880484	215
TCONS_02047463	XLOC_1484697	chr20	-	2	4,779,484,947,804,650	137,204
TCONS_02467336	XLOC_1623744	chr3	-	2	3,206,735,432,067,540	164,47
TCONS_00531144	XLOC_377581	chr11	-	2	1,399,375,413,994,220	150,53
TCONS_01645628	XLOC_1177058	chr19	-	3	277,318,982,773,268,000,000,000	119,105,103
TCONS_03262531	XLOC_2394434	chr7	+	1	100427163	316
TCONS_03275426	XLOC_2395121	chr7	+	1	149537437	323
TCONS_01701434	XLOC_1228948	chr19_gl000208_random	-	2	8,132,285,891	139,110
TCONS_01737177	XLOC_1235670	chr2	-	2	181,271,477,181,273,000	208,76
TCONS_00701783	XLOC_514765	chr12	+	1	92009784	227
TCONS_01621660	XLOC_1177025	chr19	-	2	2,345,280,523,456,870	289,42
TCONS_01724049	XLOC_1235018	chr2	-	2	128,143,121,128,145,000	28,409
TCONS_00888785	XLOC_650467	chr13	+	2	2,371,362,023,714,260	111,139
TCONS_01731338	XLOC_1231876	chr2	+	1	153475716	208
TCONS_03897789	XLOC_2839302	chrX	+	1	91642323	315
TCONS_01468058	XLOC_1014170	chr17	+	2	2,225,111,322,253,590	106,225
TCONS_01939995	XLOC_1229987	chr2	+	1	18742453	214
TCONS_02180860	XLOC_1585420	chr22	+	3	450,705,074,507,076,000,000,000	29,64,173
TCONS_03718010	XLOC_2711948	chr9	+	1	99181367	485
TCONS_03011076	XLOC_2032925	chr5	-	2	176,298,672,176,299,000	59,153
TCONS_00885929	XLOC_516689	chr12	-	1	63265873	263
TCONS_00858650	XLOC_515181	chr12	+	2	113,494,732,113,495,000	17,324
TCONS_03687710	XLOC_2710927	chr9	+	2	470,406,471,445	276,142
TCONS_02576017	XLOC_1828054	chr4	+	1	985569	376
TCONS_02135150	XLOC_1547596	chr21	-	1	20467412	341
TCONS_02227857	XLOC_1585542	chr22	+	1	50615032	290
TCONS_01276764	XLOC_930738	chr16	+	2	586,055,587,133	87,288
TCONS_02253474	XLOC_1624302	chr3	-	1	59035381	244
TCONS_00098435	XLOC_005671	chr1	-	1	55631048	261
TCONS_00981623	XLOC_650566	chr13	+	1	28321758	215
TCONS_03691757	XLOC_2712899	chr9	-	2	37,805,313,780,957	100,103
TCONS_00528699	XLOC_379254	chr11	-	2	125,443,362,125,462,000	108,98
TCONS_01183624	XLOC_846905	chr15	-	1	32815468	205
TCONS_01580302	XLOC_1093995	chr18	+	1	61223578	202
TCONS_03036980	XLOC_2217833	chr6	+	4	58,146,711,581,497,700,000,000,000,000,000	67,193,182,106
TCONS_00753623	XLOC_513782	chr12	+	1	21355776	211
TCONS_01403235	XLOC_1014824	chr17	+	2	4,597,400,945,975,180	203,69
TCONS_00025742	XLOC_004601	chr1	-	3	938,168,893,901,119,000,000	21,106,100
TCONS_03177866	XLOC_2217048	chr6	+	1	13599031	232
TCONS_01160282	XLOC_845645	chr15	+	1	45777911	244
TCONS_01692663	XLOC_1174592	chr19	+	2	1,744,216,017,443,080	80,127
TCONS_01377186	XLOC_933704	chr16	-	3	630,599,166,306,246,000,000,000	104,114,53
TCONS_01303517	XLOC_932137	chr16	+	1	72838713	592
TCONS_02143742	XLOC_1547524	chr21	-	1	14367857	321
TCONS_01674073	XLOC_1177724	chr19	-	3	491,368,384,913,904,000,000,000	74,205,672
TCONS_00337461	XLOC_236207	chr10	+	1	88733560	494
TCONS_03450845	XLOC_2393099	chr7	+	2	65,456,106,545,886	181,21
TCONS_00565222	XLOC_375036	chr11	+	1	3052865	207
TCONS_04023820	XLOC_2840093	chrX	-	2	1,122,155,911,272,660	94,143
TCONS_01268280	XLOC_934192	chr16	-	2	8,907,415,589,075,690	318,20
TCONS_01376079	XLOC_931534	chr16	+	1	31132937	1197
TCONS_01156921	XLOC_847763	chr15	-	2	7,824,658,878,267,520	98,183
TCONS_03680919	XLOC_2712918	chr9	-	4	5,307,961,531,093,150,000,000,000,000	307,141,130,58
TCONS_01594848	XLOC_1095031	chr18	-	1	77233398	228
TCONS_01628128	XLOC_1177890	chr19	-	3	524,852,155,248,730,000,000,000	69,126,62
TCONS_03838027	XLOC_2834702	chr9_gl000199_random	+	2	5,657,964,315	249,163
TCONS_02466836	XLOC_1622198	chr3	+	1	116362873	348
TCONS_01794284	XLOC_1230521	chr2	+	1	55833729	205
TCONS_03265827	XLOC_2396454	chr7	-	2	7,570,430,775,706,420	150,191
TCONS_01645927	XLOC_1177311	chr19	-	1	38909860	370
TCONS_01282333	XLOC_933618	chr16	-	2	5,689,033,856,974,610	13,188
TCONS_01162501	XLOC_845355	chr15	+	2	3,146,815,931,473,250	220,10
TCONS_00339784	XLOC_236756	chr10	+	3	117,027,852,117,040,000,000,000,000	69,73,95
TCONS_00679226	XLOC_375749	chr11	+	2	5,158,076,451,582,890	92,113
TCONS_01495155	XLOC_1015447	chr17	+	3	755,430,337,554,405,000,000,000	141,188,120
TCONS_01181084	XLOC_845208	chr15	+	3	246,386,942,464,197,000,000,000	69,27,169
TCONS_04023554	XLOC_2838593	chrX	+	2	1,911,966,319,120,250	85,136
TCONS_01940824	XLOC_1231421	chr2	+	1	113891971	205
TCONS_03468516	XLOC_2557511	chr7_gl000195_random	-	3	110,500,115,060,115,000	442,91,42
TCONS_01301430	XLOC_930775	chr16	+	1	1246051	317
TCONS_00339947	XLOC_237326	chr10	-	3	151,486,371,515,103,000,000,000	60,176,66
TCONS_03810186	XLOC_2712500	chr9	+	1	131645370	436
TCONS_00342115	XLOC_235798	chr10	+	2	6,112,204,261,122,820	101,185
TCONS_03308952	XLOC_2393290	chr7	+	1	23826673	376
TCONS_00032604	XLOC_007486	chr1	-	2	187,728,607,187,729,000	111,101
TCONS_03690934	XLOC_2711397	chr9	+	1	40043274	278
TCONS_01535418	XLOC_1094446	chr18	-	2	1,851,180,718,515,680	150,112
TCONS_00036374	XLOC_004358	chr1	-	2	788,795,789,105	114,142
TCONS_00286139	XLOC_002309	chr1	+	3	121,357,767,121,359,000,000,000,000	311,37,110
TCONS_01147167	XLOC_848023	chr15	-	2	9,331,983,593,320,400	178,81
TCONS_00481380	XLOC_235369	chr10	+	3	275,680,652,756,954,000,000,000	43,199,17
TCONS_01735153	XLOC_1229941	chr2	+	4	13,677,811,137,491,800,000,000,000,000,000	327,106,267,45
TCONS_02197248	XLOC_1584759	chr22	+	1	21474573	517
TCONS_01514120	XLOC_1094751	chr18	-	2	4,779,088,747,792,700	45,215
TCONS_02143990	XLOC_1547740	chr21	-	2	3,296,771,232,967,890	155,60
TCONS_00457084	XLOC_237146	chr10	-	2	32,108,883,211,145	217,44
TCONS_01796387	XLOC_1231900	chr2	+	1	157220540	346
TCONS_03029164	XLOC_2219293	chr6	-	3	363,220,436,342,523,000,000	219,41,698
TCONS_02113483	XLOC_1483459	chr20	+	1	42491454	285
TCONS_02430607	XLOC_1623531	chr3	-	1	10934986	256
TCONS_00226366	XLOC_000345	chr1	+	1	11670182	231
TCONS_03240660	XLOC_2220255	chr6	-	1	74753651	300
TCONS_00019772	XLOC_001436	chr1	+	2	5,525,849,455,260,410	238,12
TCONS_02314095	XLOC_1623565	chr3	-	2	1,300,469,513,008,880	132,315
TCONS_01611678	XLOC_1174981	chr19	+	1	35701688	208
TCONS_01267929	XLOC_932941	chr16	-	2	1,672,254,216,723,510	188,35
TCONS_00924863	XLOC_652425	chr13	-	2	100,261,658,100,299,000	19,249
TCONS_02185696	XLOC_1585289	chr22	+	3	412,844,714,129,104,000,000,000	54,185,68
TCONS_02190039	XLOC_1586360	chr22	-	2	4,542,066,245,436,840	218,19
TCONS_01230607	XLOC_845168	chr15	+	2	2,282,713,622,829,560	60,142
TCONS_02767715	XLOC_2027931	chr4_ctg9_hap1	-	2	463,939,465,861	220,47
TCONS_01387083	XLOC_1015109	chr17	+	1	60213685	259
TCONS_03275323	XLOC_2394895	chr7	+	2	137,823,614,137,823,000	255,73
TCONS_01728193	XLOC_1236482	chr2	-	3	242,512,071,242,512,000,000,000,000	145,283,144
TCONS_01267844	XLOC_932550	chr16	-	1	945774	274
TCONS_01627716	XLOC_1176936	chr19	-	3	203,795,992,038,237,000,000,000	526,96,104
TCONS_03248211	XLOC_2394818	chr7	+	1	132062371	245
TCONS_02189262	XLOC_1584766	chr22	+	1	21644543	300
TCONS_00758575	XLOC_517162	chr12	-	2	104,529,260,104,531,000	50,599
TCONS_01162959	XLOC_846115	chr15	+	1	75076867	266
TCONS_03036940	XLOC_2217670	chr6	+	1	44114800	233
TCONS_03269653	XLOC_2397587	chr7	-	2	156,264,684,156,376,000	721,138
TCONS_00712833	XLOC_514803	chr12	+	1	93976233	294
TCONS_01505403	XLOC_1092982	chr17_gl000205_random	+	4	33,882,362,863,801,700,000	134,103,98,127
TCONS_02253250	XLOC_1623915	chr3	-	2	4,459,898,344,666,210	101,120
TCONS_03720498	XLOC_2713859	chr9	-	1	96961061	205
TCONS_03487791	XLOC_2558660	chr8	+	3	657,114,456,571,639,000,000,000	209,73,44
TCONS_04016826	XLOC_2839985	chrX	+	1	154840243	617
TCONS_01035723	XLOC_753398	chr14	+	1	75352361	294
TCONS_01158346	XLOC_846040	chr15	+	2	7,243,870,672,440,490	81,147
TCONS_00713169	XLOC_515471	chr12	+	1	127104693	277
TCONS_01702330	XLOC_1229701	chr2	+	2	393,563,393,785	78,149
TCONS_00755541	XLOC_515015	chr12	+	1	107075154	354
TCONS_01731555	XLOC_1232275	chr2	+	1	189153889	1051
TCONS_01611281	XLOC_1173922	chr19	+	1	975251	235
TCONS_01017927	XLOC_650595	chr13	+	2	3,079,675,330,797,340	245,37
TCONS_01617899	XLOC_1175128	chr19	+	2	3,863,289,638,633,210	202,75
TCONS_01265250	XLOC_846101	chr15	+	1	74595584	320
TCONS_02739167	XLOC_1831496	chr4	-	1	127829818	291
TCONS_01158335	XLOC_846018	chr15	+	4	71,370,668,713,721,600,000,000,000,000,000	14,164,172,918
TCONS_02187919	XLOC_1584737	chr22	+	3	208,529,342,085,352,000,000,000	144,126,98
TCONS_00719737	XLOC_517724	chr12	-	2	133,404,065,133,405,000	234,128
TCONS_01940419	XLOC_1230703	chr2	+	1	69635509	226
TCONS_02186708	XLOC_1584738	chr22	+	1	20928897	209
TCONS_01467747	XLOC_1013743	chr17	+	1	6134190	310
TCONS_02510432	XLOC_1830746	chr4	-	2	4,928,605,049,292,130	71,138
TCONS_00499599	XLOC_238882	chr10	-	4	130,458,626,130,459,000,000,000,000,000,000,000	120,254,192,141
TCONS_01534099	XLOC_1093451	chr18	+	1	13559671	403
TCONS_03843158	XLOC_2837244	chrUn_gl000225	-	2	70,832,135,126	451,29
TCONS_01611340	XLOC_1174049	chr19	+	1	3760539	345
TCONS_00022359	XLOC_007379	chr1	-	2	179,512,492,179,517,000	187,32
TCONS_01741335	XLOC_1232315	chr2	+	1	191777693	246
TCONS_01985870	XLOC_1230228	chr2	+	1	32582715	327
TCONS_01495751	XLOC_1016574	chr17	-	2	3,735,118,937,357,150	34,175
TCONS_01490287	XLOC_1015365	chr17	+	1	73482585	230
TCONS_03842624	XLOC_2836994	chrUn_gl000224	-	1	27951	506
TCONS_00889072	XLOC_651488	chr13	+	2	113,742,941,113,743,000	1,224
TCONS_02186009	XLOC_1586056	chr22	-	4	35,296,574,352,984,300,000,000,000,000,000	22,83,141,19
TCONS_00029576	XLOC_000646	chr1	+	2	2,248,294,922,483,200	81,132
TCONS_03442617	XLOC_2394777	chr7	+	2	129,400,047,129,408,000	230,31
TCONS_01702903	XLOC_1231540	chr2	+	1	122549047	251
TCONS_01131950	XLOC_755245	chr14	-	1	104253094	288
TCONS_00533989	XLOC_377713	chr11	-	3	249,667,492,496,692,000,000,000	24,91,100
TCONS_03311799	XLOC_2395312	chr7	+	1	158333097	504
TCONS_01740451	XLOC_1230711	chr2	+	1	70098629	236
TCONS_03037152	XLOC_2218331	chr6	+	2	110,982,658,110,993,000	137,67
TCONS_00833395	XLOC_514468	chr12	+	1	63938717	380
TCONS_01692458	XLOC_1174217	chr19	+	4	8,070,687,807,317,680,000,000,000,000	155,138,165,58
TCONS_00380549	XLOC_238314	chr10	-	2	9,342,952,993,449,460	291,15
TCONS_00982013	XLOC_651333	chr13	+	1	102219780	210
TCONS_02310211	XLOC_1621025	chr3	+	1	14342530	367
TCONS_02785798	XLOC_2028893	chr5	+	3	155,996,191,560,082,000,000,000	135,96,108
TCONS_01672409	XLOC_1174609	chr19	+	1	17893424	340
TCONS_01623725	XLOC_1175372	chr19	+	1	44637804	470
TCONS_02526068	XLOC_1828024	chr4	+	2	124,352,212,440	203,60
TCONS_02835914	XLOC_2029974	chr5	+	2	116,433,408,116,433,000	164,64
TCONS_02121936	XLOC_1484278	chr20	-	2	2,494,494,624,949,520	279,82
TCONS_00981754	XLOC_650818	chr13	+	1	46070456	373
TCONS_03262519	XLOC_2394414	chr7	+	2	100,180,252,100,182,000	156,58
TCONS_00698106	XLOC_376975	chr11	+	1	119074740	266
TCONS_01800961	XLOC_1235157	chr2	-	1	135741497	201
TCONS_00715641	XLOC_515343	chr12	+	3	122,200,041,122,208,000,000,000,000	152,70,31
TCONS_01404227	XLOC_1017438	chr17	-	2	7,326,624,573,267,020	81,201
TCONS_03691165	XLOC_2711847	chr9	+	1	94668483	321
TCONS_02769381	XLOC_2030224	chr5	+	1	136733384	250
TCONS_02216881	XLOC_1584574	chr22	+	1	16247811	601
TCONS_03039722	XLOC_2216956	chr6	+	1	6687394	290
TCONS_01620393	XLOC_1174229	chr19	+	1	8371138	370
TCONS_01505606	XLOC_1092982	chr17_gl000205_random	+	1	69367	425
TCONS_01401997	XLOC_1017695	chr17	-	2	8,041,223,080,415,310	59,281
TCONS_01277480	XLOC_932352	chr16	+	2	8,631,232,386,312,490	112,92
TCONS_01365405	XLOC_932302	chr16	+	2	8,448,351,984,485,520	195,83
TCONS_01365292	XLOC_932034	chr16	+	1	69119323	330
TCONS_02489976	XLOC_1623401	chr3	+	1	197611238	681
TCONS_01275026	XLOC_931475	chr16	+	2	3,036,790,930,370,350	395,106
TCONS_01406213	XLOC_1015027	chr17	+	1	56297461	255
TCONS_01736255	XLOC_1232820	chr2	+	1	227665101	382
TCONS_02524242	XLOC_1829112	chr4	+	2	9,003,274,090,033,210	294,33
TCONS_02429171	XLOC_1620925	chr3	+	1	9753778	259
TCONS_01736342	XLOC_1233095	chr2	+	1	241970248	302
TCONS_00670673	XLOC_375194	chr11	+	2	94,062,209,430,032	174,39
TCONS_03262412	XLOC_2394240	chr7	+	2	9,176,420,191,765,520	195,80
TCONS_03897238	XLOC_2838855	chrX	+	1	47796233	412
TCONS_03036891	XLOC_2217605	chr6	+	1	42715313	344
TCONS_03638439	XLOC_2559082	chr8	+	1	103425205	303
TCONS_03843420	XLOC_2837436	chrUn_gl000228	-	1	117590	1232
TCONS_00037703	XLOC_008119	chr1	-	2	234,407,075,234,408,000	102,125
TCONS_00833607	XLOC_514896	chr12	+	1	100691424	366
TCONS_00982073	XLOC_651440	chr13	+	2	112,197,868,112,198,000	47,285
TCONS_00718609	XLOC_515259	chr12	+	2	118,513,980,118,515,000	136,78
TCONS_01163307	XLOC_846728	chr15	-	1	22816157	230
TCONS_03845510	XLOC_2839425	chrX	+	1	105193220	267
TCONS_02524902	XLOC_1831038	chr4	-	2	7,807,591,578,076,420	214,116
TCONS_03178378	XLOC_2217981	chr6	+	1	76735365	244
TCONS_02739164	XLOC_1831488	chr4	-	1	125599433	273
TCONS_02259336	XLOC_1621931	chr3	+	2	8,727,367,187,273,900	39,170
TCONS_01618231	XLOC_1175747	chr19	+	2	5,217,947,652,179,680	147,137
TCONS_01144217	XLOC_755003	chr14	-	4	89,827,042,898,271,400,000,000,000,000,000	35,51,54,110
TCONS_02509931	XLOC_1828817	chr4	+	2	6,263,027,362,635,620	28,220
TCONS_02467482	XLOC_1624045	chr3	-	2	4,902,301,049,026,980	124,149
TCONS_01301655	XLOC_930915	chr16	+	1	3324128	781
TCONS_02227626	XLOC_1584705	chr22	+	1	20091680	229
TCONS_00568426	XLOC_377222	chr11	+	1	134013790	218
TCONS_04016481	XLOC_2838779	chrX	+	1	41471741	206
TCONS_01535533	XLOC_1094542	chr18	-	1	25564482	420
TCONS_03989208	XLOC_2839737	chrX	+	1	134857935	387
TCONS_02263739	XLOC_1623800	chr3	-	3	378,470,063,784,756,000,000,000	91,150,121
TCONS_01741822	XLOC_1233112	chr2	+	1	242212658	206
TCONS_02132032	XLOC_1547285	chr21	+	2	4,295,318,442,954,520	209,249
TCONS_02259574	XLOC_1622421	chr3	+	2	128,902,920,128,917,000	395,105
TCONS_03227559	XLOC_2218899	chr6	+	1	158037091	247
TCONS_02578184	XLOC_1829445	chr4	+	1	126402356	209
TCONS_01644168	XLOC_1175876	chr19	+	1	54428967	465
TCONS_03845862	XLOC_2840609	chrX	-	3	616,855,576,168,977,000,000,000	100,148,153
TCONS_02728920	XLOC_1828682	chr4	+	1	49308040	352
TCONS_01725876	XLOC_1229941	chr2	+	4	13,677,820,137,491,800,000,000,000,000,000	318,106,91,448
TCONS_00723784	XLOC_513362	chr12	+	1	1447800	333
TCONS_02227813	XLOC_1585341	chr22	+	1	42480830	233
TCONS_00687459	XLOC_377875	chr11	-	4	40,823,717,408,259,800,000,000,000,000,000	25,111,67,11
TCONS_03404503	XLOC_2396586	chr7	-	1	90330968	333
TCONS_01031569	XLOC_753136	chr14	+	1	60427945	524
TCONS_01672333	XLOC_1174489	chr19	+	2	1,487,752,414,882,200	289,50
TCONS_03491310	XLOC_2560462	chr8	-	1	66665956	390
TCONS_01489893	XLOC_1013637	chr17	+	2	24,792,852,480,233	234,43
TCONS_01644777	XLOC_1176374	chr19	-	2	63,530,596,353,366	113,105
TCONS_02184277	XLOC_1584759	chr22	+	2	2,145,736,821,460,420	147,113
TCONS_01689329	XLOC_1176026	chr19	+	1	57282461	327
TCONS_03464165	XLOC_2395166	chr7	+	1	150834998	216
TCONS_01005574	XLOC_652020	chr13	-	1	49675466	252
TCONS_01672203	XLOC_1174257	chr19	+	1	8886113	228
TCONS_02174250	XLOC_1547176	chr21	+	1	37365301	261
TCONS_01401642	XLOC_1016954	chr17	-	2	4,678,610,646,786,320	127,92
TCONS_01156511	XLOC_846837	chr15	-	2	2,909,289,529,093,640	193,33
TCONS_02261017	XLOC_1625662	chr3	-	3	187,720,208,187,721,000,000,000,000	159,88,14
TCONS_02526276	XLOC_1828595	chr4	+	2	4,140,815,741,412,530	162,77
TCONS_03403552	XLOC_2394467	chr7	+	1	101188072	308
TCONS_02051129	XLOC_1483162	chr20	+	1	29614364	320
TCONS_03268162	XLOC_2394124	chr7	+	5	7,638,208,576,386,000,000,000,000,000,000,000,000,000	77,91,101,134,203
TCONS_03680512	XLOC_2712110	chr9	+	2	110,355,706,110,381,000	72,162
TCONS_03240414	XLOC_2218001	chr6	+	1	79932525	600
TCONS_01144267	XLOC_755275	chr14	-	1	105346882	297
TCONS_03210343	XLOC_2221274	chr6	-	2	168,547,510,168,547,000	179,39
TCONS_00031109	XLOC_003912	chr1	+	4	226,321,064,226,334,000,000,000,000,000,000,000	91,138,109,126
TCONS_01247604	XLOC_847150	chr15	-	1	44855562	250
TCONS_02749770	XLOC_1829824	chr4	+	1	165728596	708
TCONS_03482026	XLOC_2561440	chr8	-	2	146,217,471,146,219,000	107,269
TCONS_02260571	XLOC_1624647	chr3	-	3	111,528,102,111,554,000,000,000,000	26,176,46
TCONS_00715025	XLOC_513845	chr12	+	4	27,300,570,273,014,600,000,000,000,000,000	19,75,168,45
TCONS_02534634	XLOC_1828303	chr4	+	1	10010581	266
TCONS_03897016	XLOC_2838706	chrX	+	1	33167872	310
TCONS_00339211	XLOC_235202	chr10	+	1	13768346	237
TCONS_03639041	XLOC_2561163	chr8	-	1	130055165	214
TCONS_01693089	XLOC_1175246	chr19	+	1	41337485	388
TCONS_01162383	XLOC_845158	chr15	+	1	22743661	220
TCONS_00724975	XLOC_515524	chr12	+	2	131,016,489,131,016,000	42,272
TCONS_00719337	XLOC_516876	chr12	-	2	7,929,715,379,298,840	205,20
TCONS_01740535	XLOC_1230863	chr2	+	1	77235426	593
TCONS_00859079	XLOC_516409	chr12	-	1	51192215	269
TCONS_01483604	XLOC_1014075	chr17	+	2	1,910,491,519,105,250	45,343
TCONS_02530508	XLOC_1831778	chr4	-	4	155,929,091,155,929,000,000,000,000,000,000,000	51,186,28,57
TCONS_01247187	XLOC_846184	chr15	+	1	78456407	220
TCONS_02224309	XLOC_1584873	chr22	+	1	24820136	231
TCONS_00527095	XLOC_375081	chr11	+	1	4714223	221
TCONS_03309665	XLOC_2393845	chr7	+	1	64552212	202
TCONS_01032476	XLOC_755175	chr14	-	2	100,694,981,100,703,000	86,125
TCONS_01580739	XLOC_1094928	chr18	-	1	68695853	310
TCONS_01514873	XLOC_1093286	chr18	+	1	2914986	669
TCONS_00720935	XLOC_513822	chr12	+	2	2,534,815,525,348,640	116,143
TCONS_03481117	XLOC_2558944	chr8	+	3	943,425,719,434,291,000,000,000	13,222,30
TCONS_01701382	XLOC_1228937	chr19_gl000208_random	+	2	3,862,439,111	145,216
TCONS_03810590	XLOC_2713539	chr9	-	2	7,065,252,470,652,890	175,51
TCONS_03034697	XLOC_2219687	chr6	-	3	280,902,882,809,086,000,000,000	130,128,83
TCONS_01284396	XLOC_932081	chr16	+	1	70653480	282
TCONS_02180744	XLOC_1585036	chr22	+	1	31585453	231
TCONS_02580449	XLOC_1831212	chr4	-	1	99729224	527
TCONS_03896806	XLOC_2838561	chrX	+	1	16781127	546
TCONS_01630378	XLOC_1175416	chr19	+	1	45644006	342
TCONS_03838246	XLOC_2834721	chr9_gl000199_random	-	1	38250	281
TCONS_03248178	XLOC_2394741	chr7	+	1	128316838	297
TCONS_02259993	XLOC_1623391	chr3	+	1	197235105	212
TCONS_00874847	XLOC_515686	chr12	-	2	29,144,302,917,123	53,167
TCONS_01302450	XLOC_931460	chr16	+	1	29941663	203
TCONS_01611881	XLOC_1175452	chr19	+	2	4,643,183,246,468,020	134,275
TCONS_01742318	XLOC_1234198	chr2	-	2	6,957,731,369,581,620	2,211
TCONS_01427968	XLOC_1017331	chr17	-	1	67224339	205
TCONS_00900487	XLOC_652382	chr13	-	3	965,368,959,653,918,000,000,000	39,111,53
TCONS_02000614	XLOC_1230779	chr2	+	1	73451373	237
TCONS_01258060	XLOC_846923	chr15	-	2	3,415,121,834,156,950	77,157
TCONS_03610616	XLOC_2558168	chr8	+	1	25181481	207
TCONS_03178914	XLOC_2219046	chr6	+	1	167426383	262
TCONS_00097752	XLOC_005104	chr1	-	1	31140930	205
TCONS_03690678	XLOC_2710923	chr9	+	1	385982	295
TCONS_00230503	XLOC_008125	chr1	-	1	234591725	318
TCONS_02040106	XLOC_1482998	chr20	+	1	15468759	228
TCONS_02190076	XLOC_1586448	chr22	-	1	49300742	235
TCONS_01645510	XLOC_1176934	chr19	-	2	2,019,279,220,196,300	13,347
TCONS_02266778	XLOC_1621378	chr3	+	1	42988344	365
TCONS_02738867	XLOC_1829856	chr4	+	2	169,341,498,169,341,000	114,117
TCONS_01386994	XLOC_1014847	chr17	+	1	46657311	376
TCONS_01423423	XLOC_1014154	chr17	+	1	21449028	215
TCONS_03988604	XLOC_2838593	chrX	+	1	19119932	321
TCONS_02837884	XLOC_2031390	chr5	-	1	37206535	330
TCONS_03403816	XLOC_2394940	chr7	+	1	140405605	555
TCONS_01265122	XLOC_845102	chr15	+	2	2,006,440,420,065,030	199,28
TCONS_00376176	XLOC_235128	chr10	+	1	8219642	201
TCONS_01108604	XLOC_752515	chr14	+	1	19398911	338
TCONS_03270943	XLOC_2393119	chr7	+	2	76,803,527,681,134	100,183
TCONS_00687736	XLOC_378533	chr11	-	2	7,301,895,873,019,290	177,368
TCONS_01395041	XLOC_1013822	chr17	+	2	79,602,017,966,085	265,35
TCONS_03526191	XLOC_2561002	chr8	-	2	117,884,675,117,886,000	36,165
TCONS_03857405	XLOC_2839384	chrX	+	1	101880665	242
TCONS_01058155	XLOC_754940	chr14	-	3	807,799,088,085,402,000,000,000	14,131,149
TCONS_00718472	XLOC_514970	chr12	+	2	104,359,640,104,366,000	198,32
TCONS_02121598	XLOC_1483527	chr20	+	1	45052023	201
TCONS_03028443	XLOC_2217307	chr6	+	2	2,782,058,027,820,820	16,227
TCONS_00568461	XLOC_377241	chr11	+	2	134,798,041,134,799,000	63,181
TCONS_01797910	XLOC_1232788	chr2	+	1	223754407	469
TCONS_01278035	XLOC_933918	chr16	-	2	7,403,063,274,032,720	136,128
TCONS_02767996	XLOC_2028130	chr4_gl000193_random	+	2	8,170,396,053	254,49
TCONS_01725853	XLOC_1229888	chr2	+	3	105,902,041,059,218,000,000,000	203,64,130
TCONS_00272519	XLOC_006446	chr1	-	2	119,682,949,119,683,000	132,232
TCONS_02580567	XLOC_1831296	chr4	-	1	107165413	206
TCONS_02180955	XLOC_1585756	chr22	-	2	2,222,476,422,225,210	151,52
TCONS_03029393	XLOC_2219913	chr6	-	2	4,149,168,041,513,820	283,39
TCONS_00671293	XLOC_376780	chr11	+	1	108179005	345
TCONS_00347367	XLOC_235320	chr10	+	1	24875413	203
TCONS_03490038	XLOC_2558020	chr8	+	1	15519808	346
TCONS_02784755	XLOC_2032445	chr5	-	2	138,700,755,138,701,000	50,151
TCONS_01401200	XLOC_1015886	chr17	-	2	74,853,797,487,235	99,121
TCONS_00757667	XLOC_516514	chr12	-	2	5,395,782,253,981,060	254,24
TCONS_01626984	XLOC_1175375	chr19	+	2	4,469,986,344,700,200	189,683
TCONS_04045725	XLOC_2993640	chrY	-	2	9,952,831,057,202	130,147
TCONS_03898536	XLOC_2839792	chrX	+	1	140533801	204
TCONS_03267972	XLOC_2393688	chr7	+	2	5,163,804,551,647,040	151,51
TCONS_02836798	XLOC_2030567	chr5	+	1	155360913	279
TCONS_02253148	XLOC_1623642	chr3	-	3	190,480,571,904,897,000,000,000	116,153,37
TCONS_03040776	XLOC_2218810	chr6	+	1	150714948	275
TCONS_00530223	XLOC_375467	chr11	+	2	3,044,945,330,450,510	72,252
TCONS_01693842	XLOC_1176619	chr19	-	1	12191284	310
TCONS_00380351	XLOC_238152	chr10	-	1	79759902	204
TCONS_02577612	XLOC_1829105	chr4	+	1	89591579	325
TCONS_01517639	XLOC_1094110	chr18	+	2	7,408,759,974,087,910	53,238
TCONS_03272211	XLOC_2396564	chr7	-	2	8,750,479,387,505,410	56,225
TCONS_03082309	XLOC_2221183	chr6	-	1	161990034	203
TCONS_03209762	XLOC_2219065	chr6	+	1	168087852	208
TCONS_02534606	XLOC_1828219	chr4	+	1	6805941	243
TCONS_02263936	XLOC_1624274	chr3	-	4	57,888,978,578,913,200,000,000,000,000,000	1168,56,93,106
TCONS_02694083	XLOC_1830043	chr4	+	1	186721489	310
TCONS_03610609	XLOC_2558161	chr8	+	1	24257119	399
TCONS_00724082	XLOC_513917	chr12	+	1	32182263	208
TCONS_01302641	XLOC_931584	chr16	+	1	32443083	346
TCONS_02693008	XLOC_1828082	chr4	+	2	14,223,311,422,930	184,171
TCONS_00024327	XLOC_001004	chr1	+	2	3,575,096,435,751,950	178,40
TCONS_01502874	XLOC_1016781	chr17	-	1	41583564	252
TCONS_01580319	XLOC_1094024	chr18	+	1	65186978	230
TCONS_03031245	XLOC_2218399	chr6	+	4	116,609,606,116,631,000,000,000,000,000,000,000	50,61,63,65
TCONS_03274306	XLOC_2392967	chr7	+	1	1072122	251
TCONS_00718350	XLOC_514668	chr12	+	2	8,032,926,380,334,140	175,62
TCONS_03264909	XLOC_2393819	chr7	+	2	6,376,819,063,768,830	56,156
TCONS_01365298	XLOC_932041	chr16	+	2	6,927,210,269,274,170	33,209
TCONS_01798021	XLOC_1232863	chr2	+	1	231156693	393
TCONS_04043477	XLOC_2993549	chrY	+	2	1,600,108,516,014,750	254,64
TCONS_03245538	XLOC_2391385	chr6_mann_hap4	-	2	16,076,341,611,999	832,10
TCONS_03787899	XLOC_2712096	chr9	+	1	109625948	356
TCONS_00338522	XLOC_238882	chr10	-	2	130,487,119,130,489,000	172,119
TCONS_01742511	XLOC_1234644	chr2	-	1	98122971	260
TCONS_00723779	XLOC_513355	chr12	+	1	1125089	231
TCONS_02768283	XLOC_2028146	chr4_gl000193_random	-	2	121,891,131,338	21,229
TCONS_01799047	XLOC_1233599	chr2	-	2	2,748,690,327,498,040	47,166
TCONS_01027991	XLOC_753309	chr14	+	2	7,127,693,971,281,820	69,163
TCONS_01721939	XLOC_1229941	chr2	+	4	13,677,824,137,491,800,000,000,000,000,000	314,106,91,216
TCONS_03989713	XLOC_2840842	chrX	-	1	82063562	265
TCONS_03312636	XLOC_2396014	chr7	-	1	47825451	321
TCONS_02466856	XLOC_1622297	chr3	+	1	122466441	269
TCONS_02467518	XLOC_1624082	chr3	-	2	4,982,287,949,823,780	54,155
TCONS_01580056	XLOC_1093603	chr18	+	1	24030223	297
TCONS_02738805	XLOC_1829528	chr4	+	1	138424837	239
TCONS_00340527	XLOC_238882	chr10	-	2	130,396,483,130,487,000	136,112
TCONS_00098359	XLOC_005609	chr1	-	2	5,356,230,453,563,440	329,38
TCONS_03037952	XLOC_2220892	chr6	-	1	138481515	258
TCONS_01535123	XLOC_1094168	chr18	+	1	77441695	215
TCONS_01502764	XLOC_1016157	chr17	-	2	1,879,164,118,792,020	337,95
TCONS_02467102	XLOC_1623083	chr3	+	1	182971765	361
TCONS_00537117	XLOC_377139	chr11	+	1	127092849	203
TCONS_03898232	XLOC_2839563	chrX	+	1	118148439	202
TCONS_00717866	XLOC_513618	chr12	+	3	976,035,097,698,399,000,000	48,108,72
TCONS_03691107	XLOC_2711746	chr9	+	1	87172550	216
TCONS_02133471	XLOC_1547436	chr21	+	2	4,716,214,747,169,290	114,201
TCONS_03228444	XLOC_2220968	chr6	-	2	146,129,003,146,135,000	93,120
TCONS_01057374	XLOC_754289	chr14	-	2	3,617,676,436,184,910	25,268
TCONS_01231399	XLOC_846528	chr15	+	1	93758931	391
TCONS_02783439	XLOC_2029091	chr5	+	2	3,724,925,237,250,490	71,215
TCONS_01673774	XLOC_1177058	chr19	-	3	277,319,132,773,302,000,000,000	104,40,65
TCONS_03481610	XLOC_2560378	chr8	-	2	5,812,225,458,126,820	188,46
TCONS_01181073	XLOC_845206	chr15	+	3	243,887,442,439,999,000,000,000	308,76,174
TCONS_00528519	XLOC_378671	chr11	-	4	81,821,449,818,989,300,000,000,000,000,000	31,40,82,106
TCONS_03178213	XLOC_2217675	chr6	+	1	44189344	211
TCONS_01424445	XLOC_1014845	chr17	+	2	4,662,396,046,625,730	141,109
TCONS_03638018	XLOC_2557930	chr8	+	1	9035913	241
TCONS_03523137	XLOC_2558664	chr8	+	1	66251132	404
TCONS_01010785	XLOC_650926	chr13	+	1	52637687	246
TCONS_00565759	XLOC_375401	chr11	+	1	23033552	379
TCONS_02509927	XLOC_1828809	chr4	+	1	61964597	321
TCONS_02837671	XLOC_2031220	chr5	-	1	17088534	229
TCONS_01028257	XLOC_753921	chr14	+	2	105,767,395,105,773,000	230,421
TCONS_02186106	XLOC_1586336	chr22	-	2	4,439,464,244,395,190	250,94
TCONS_01630025	XLOC_1174720	chr19	+	1	20959319	329
TCONS_03483166	XLOC_2559303	chr8	+	3	128,305,147,128,313,000,000,000,000	61,112,153
TCONS_01741603	XLOC_1232750	chr2	+	1	220601830	218
TCONS_01283926	XLOC_931308	chr16	+	1	23464855	206
TCONS_01684682	XLOC_1177092	chr19	-	1	30390018	260
TCONS_01161187	XLOC_847861	chr15	-	1	83492736	410
TCONS_02792630	XLOC_2030935	chr5	+	3	180,257,900,180,258,000,000,000,000	329,48,1324
TCONS_00456594	XLOC_236212	chr10	+	1	88916576	243
TCONS_01394883	XLOC_1013638	chr17	+	2	24,969,852,538,676	315,119
TCONS_02046070	XLOC_1484040	chr20	-	2	61,001,176,103,420	105,148
TCONS_02467785	XLOC_1624890	chr3	-	2	128,211,022,128,211,000	43,283
TCONS_03896866	XLOC_2838591	chrX	+	2	1,902,369,019,024,900	124,116
TCONS_03178633	XLOC_2218528	chr6	+	1	129010023	373
TCONS_03268328	XLOC_2394404	chr7	+	3	100,033,906,100,036,000,000,000,000	99,122,69
TCONS_01617472	XLOC_1174380	chr19	+	1	12031316	246
TCONS_00701574	XLOC_514168	chr12	+	2	5,089,771,250,898,100	167,58
TCONS_01703373	XLOC_1233116	chr2	+	1	242283647	367
TCONS_01703560	XLOC_1233896	chr2	-	1	46816721	282
TCONS_02186686	XLOC_1584675	chr22	+	2	1,934,457,419,344,790	117,114
TCONS_02233883	XLOC_1585321	chr22	+	1	41997688	215
TCONS_03691730	XLOC_2712838	chr9	+	1	141038769	206
TCONS_01736711	XLOC_1234249	chr2	-	2	7,161,524,971,622,530	30,201
TCONS_02576684	XLOC_1828537	chr4	+	1	38698387	207
TCONS_01184098	XLOC_847232	chr15	-	1	50223702	401
TCONS_02581228	XLOC_1831834	chr4	-	1	163115540	209
TCONS_03523690	XLOC_2559033	chr8	+	1	99294157	454
TCONS_04039988	XLOC_2840710	chrX	-	1	70530552	283
TCONS_00526139	XLOC_378594	chr11	-	2	7,552,488,075,525,500	26,297
TCONS_02579885	XLOC_1830745	chr4	-	2	4,928,502,549,291,220	169,110
TCONS_01265124	XLOC_845108	chr15	+	1	20307203	207
TCONS_02429801	XLOC_1621979	chr3	+	1	97819622	291
TCONS_03248587	XLOC_2396227	chr7	-	2	6,392,127,863,952,240	14,303
TCONS_03468849	XLOC_2558589	chr8	+	1	58123187	263
TCONS_01736873	XLOC_1234803	chr2	-	2	109,115,617,109,116,000	266,58
TCONS_03818435	XLOC_2714299	chr9	-	3	125,946,464,125,999,000,000,000,000	113,140,79
TCONS_00646107	XLOC_376843	chr11	+	1	112135212	500
TCONS_02050136	XLOC_1484833	chr20	-	2	5,657,103,756,571,590	191,44
TCONS_02479157	XLOC_1625092	chr3	-	1	141774957	209
TCONS_00901517	XLOC_650869	chr13	+	1	49842220	271
TCONS_02577950	XLOC_1829317	chr4	+	1	113793122	293
TCONS_01800150	XLOC_1234438	chr2	-	1	87017034	289
TCONS_01630423	XLOC_1175500	chr19	+	1	47760738	492
TCONS_03403946	XLOC_2395181	chr7	+	1	151700136	319
TCONS_03308763	XLOC_2393187	chr7	+	1	16734222	228
TCONS_01505801	XLOC_1092984	chr17_gl000205_random	+	1	110244	222
TCONS_03178406	XLOC_2218048	chr6	+	1	83903282	210
TCONS_04016541	XLOC_2838953	chrX	+	1	52819365	414
TCONS_00533838	XLOC_377280	chr11	-	2	697,811,706,571	188,69
TCONS_02505493	XLOC_1625515	chr3	-	1	179860454	219
TCONS_03481821	XLOC_2560995	chr8	-	2	117,205,290,117,238,000	26,284
TCONS_01627729	XLOC_1176978	chr19	-	2	2,173,763,821,751,900	116,111
TCONS_02581232	XLOC_1831840	chr4	-	1	164066373	426
TCONS_02255855	XLOC_1623011	chr3	+	1	178051747	549
TCONS_03268396	XLOC_2394517	chr7	+	2	103,091,408,103,153,000	39,449
TCONS_01405694	XLOC_1014025	chr17	+	1	17896699	204
TCONS_01580180	XLOC_1093784	chr18	+	1	44553736	313
TCONS_00754669	XLOC_514465	chr12	+	1	63416586	363
TCONS_03692264	XLOC_2714187	chr9	-	1	117087730	294
TCONS_02117927	XLOC_1483265	chr20	+	1	32748432	338
TCONS_01056803	XLOC_753875	chr14	+	1	104506747	206
TCONS_01005447	XLOC_651283	chr13	+	1	98202680	276
TCONS_00567190	XLOC_376408	chr11	+	3	759,956,027,600,955,000,000,000	71,83,64
TCONS_03691062	XLOC_2711648	chr9	+	1	77249120	215
TCONS_02014255	XLOC_1230618	chr2	+	4	64,456,693,644,782,500,000,000,000,000,000	81,145,146,276
TCONS_00718334	XLOC_514621	chr12	+	1	75889480	414
TCONS_01387308	XLOC_1015611	chr17	+	1	80363361	285
TCONS_01267369	XLOC_931285	chr16	+	1	22509947	476
TCONS_00901791	XLOC_651374	chr13	+	1	106561059	268
TCONS_01158628	XLOC_846700	chr15	-	2	2,191,378,121,916,040	53,284
TCONS_02479211	XLOC_1625488	chr3	-	2	177,083,559,177,084,000	158,48
TCONS_03838037	XLOC_2834702	chr9_gl000199_random	+	2	87,891,148,064	138,134
TCONS_02692983	XLOC_1828050	chr4	+	1	825744	260
TCONS_01741884	XLOC_1233249	chr2	-	2	45,683,724,568,755	322,20
TCONS_01469366	XLOC_1016241	chr17	-	3	222,540,592,225,899,000,000,000	177,194,190
TCONS_02131994	XLOC_1547186	chr21	+	2	3,751,677,737,517,120	177,84
TCONS_01146176	XLOC_845116	chr15	+	1	20488979	297
TCONS_00715333	XLOC_514590	chr12	+	1	72181596	1017
TCONS_01349371	XLOC_932074	chr16	+	2	7,050,267,470,503,050	197,36
TCONS_01387159	XLOC_1015308	chr17	+	1	72030415	439
TCONS_03031414	XLOC_2218938	chr6	+	2	159,461,699,159,461,000	123,137
TCONS_00754925	XLOC_514617	chr12	+	1	75803903	259
TCONS_01689027	XLOC_1174833	chr19	+	2	2,801,103,828,012,790	381,81
TCONS_04029709	XLOC_2841271	chrX	-	3	134,229,285,134,230,000,000,000,000	1,015,258,257
TCONS_03524048	XLOC_2559251	chr8	+	1	124153164	350
TCONS_02172096	XLOC_1547451	chr21	+	1	47535976	281
TCONS_03834760	XLOC_2711828	chr9	+	1	92859777	232
TCONS_03860497	XLOC_2838877	chrX	+	1	48464651	1074
TCONS_00754299	XLOC_514246	chr12	+	1	53675438	604
TCONS_02165253	XLOC_1547743	chr21	-	1	33060854	236
TCONS_01941773	XLOC_1233103	chr2	+	1	242110664	251
TCONS_01516147	XLOC_1093691	chr18	+	1	33849467	241
TCONS_00757629	XLOC_516490	chr12	-	1	53238835	244
TCONS_01725878	XLOC_1229941	chr2	+	5	1,367,781,013,749,180,000,000,000,000,000,000,000,000	328,106,267,81,1197
TCONS_03226837	XLOC_2217330	chr6	+	1	28340293	215
TCONS_02142926	XLOC_1546952	chr21	+	2	1,810,307,218,103,930	168,40
TCONS_00342088	XLOC_235741	chr10	+	1	52385051	230
TCONS_00702035	XLOC_515519	chr12	+	2	130,742,698,130,742,000	120,321
TCONS_01692807	XLOC_1174810	chr19	+	1	24248173	387
TCONS_01265548	XLOC_847994	chr15	-	1	91307886	217
TCONS_03442995	XLOC_2396577	chr7	-	1	89545637	322
TCONS_03271335	XLOC_2394178	chr7	+	1	86480157	230
TCONS_01620551	XLOC_1174563	chr19	+	1	16746465	216
TCONS_03611115	XLOC_2559076	chr8	+	1	102570009	207
TCONS_02165086	XLOC_1547349	chr21	+	1	45302785	287
TCONS_02264277	XLOC_1625138	chr3	-	1	146228537	254
TCONS_02786187	XLOC_2030006	chr5	+	2	119,768,055,119,768,000	143,63
TCONS_01517197	XLOC_1093341	chr18	+	1	6836616	312
TCONS_03810908	XLOC_2714422	chr9	-	1	131637287	213
TCONS_00098753	XLOC_005931	chr1	-	2	8,246,462,982,464,670	23,310
TCONS_01131529	XLOC_753277	chr14	+	1	69488618	296
TCONS_02176797	XLOC_1548115	chr21	-	2	4,787,565,047,878,230	181,24
TCONS_01683496	XLOC_1174650	chr19	+	1	18787832	235
TCONS_00347710	XLOC_235954	chr10	+	1	72408625	288
TCONS_00455979	XLOC_235036	chr10	+	1	3965413	297
TCONS_03899687	XLOC_2840694	chrX	-	2	6,983,790,069,838,320	392,19
TCONS_00530418	XLOC_375929	chr11	+	1	62433514	351
TCONS_03837812	XLOC_2834640	chr9_gl000198_random	-	2	8,594,586,320	154,66
TCONS_03719114	XLOC_2712680	chr9	+	1	137293026	331
TCONS_01422765	XLOC_1013747	chr17	+	3	656,059,665,609,636,000,000	63,139,43
TCONS_01689119	XLOC_1175226	chr19	+	2	4,084,609,140,846,960	222,97
TCONS_03688787	XLOC_2713729	chr9	-	1	88915456	512
TCONS_00923740	XLOC_651516	chr13	+	1	113959814	328
TCONS_03265180	XLOC_2394460	chr7	+	1	100954584	315
TCONS_00701334	XLOC_513386	chr12	+	1	2787544	231
TCONS_01624388	XLOC_1176625	chr19	-	3	123,456,911,234,826,000,000,000	32,179,249
TCONS_03081508	XLOC_2220568	chr6	-	1	109313448	251
TCONS_01723313	XLOC_1233100	chr2	+	1	242013146	215
TCONS_01231152	XLOC_846115	chr15	+	1	75076712	234
TCONS_00896701	XLOC_652583	chr13	-	2	113,615,114,113,615,000	304,29
TCONS_03015885	XLOC_2220494	chr6	-	1	104314621	238
TCONS_02314222	XLOC_1623672	chr3	-	2	2,372,624,323,794,860	341,21
TCONS_03014937	XLOC_2217144	chr6	+	1	21354973	241
TCONS_04046968	XLOC_2993469	chrY	+	2	462,732,463,256	211,90
TCONS_02478505	XLOC_1622100	chr3	+	1	108605150	326
TCONS_01621045	XLOC_1175654	chr19	+	2	5,031,220,050,312,560	83,136
TCONS_03244505	XLOC_2390483	chr6_cox_hap2	-	1	3934885	204
TCONS_00343120	XLOC_238274	chr10	-	3	900,691,799,007,042,000,000,000	54,130,29
TCONS_01506418	XLOC_1094614	chr18	-	2	3,393,369,833,933,940	154,225
TCONS_03646591	XLOC_2560451	chr8	-	1	65915551	273
TCONS_02693381	XLOC_1828773	chr4	+	1	57164732	227
TCONS_03481156	XLOC_2559043	chr8	+	2	100,025,642,100,025,000	255,100
TCONS_03451311	XLOC_2394125	chr7	+	3	764,124,277,641,607,000,000,000	24,68,195
TCONS_02311843	XLOC_1622019	chr3	+	1	100428710	227
TCONS_00339147	XLOC_234973	chr10	+	3	112,384,311,254,951,000,000	100,122,82
TCONS_02479207	XLOC_1625465	chr3	-	2	174,849,594,174,849,000	30,217
TCONS_01384614	XLOC_933369	chr16	-	1	32631007	222
TCONS_00456319	XLOC_235717	chr10	+	1	50917249	212
TCONS_02769898	XLOC_2032014	chr5	-	1	96818258	215
TCONS_00035879	XLOC_003010	chr1	+	3	167,424,319,167,426,000,000,000,000	116,113,30
TCONS_01732449	XLOC_1234227	chr2	-	2	7,091,345,970,913,990	46,165
TCONS_03468962	XLOC_2559004	chr8	+	1	97890261	330
TCONS_00715681	XLOC_515396	chr12	+	2	123,849,206,123,849,000	85,119
TCONS_01732800	XLOC_1235293	chr2	-	1	152653390	225
TCONS_03490363	XLOC_2558521	chr8	+	3	526,090,395,260,924,000,000,000	175,15,21
TCONS_00702074	XLOC_515676	chr12	-	2	22,151,972,215,882	258,36
TCONS_01280152	XLOC_933258	chr16	-	2	3,004,078,330,046,670	53,252
TCONS_02189657	XLOC_1585493	chr22	+	2	4,799,613,747,996,370	183,30
TCONS_02786618	XLOC_2031309	chr5	-	3	294,506,082,947,683,000,000,000	124,262,226
TCONS_00686114	XLOC_375157	chr11	+	2	76,757,637,676,552	281,10
TCONS_00753892	XLOC_513980	chr12	+	1	40139569	248
TCONS_00509889	XLOC_236336	chr10	+	1	94826211	202
TCONS_01618437	XLOC_1176071	chr19	+	1	58547493	234
TCONS_03670162	XLOC_2712253	chr9	+	1	119012143	203
TCONS_00535939	XLOC_374965	chr11	+	1	828971	239
TCONS_02749653	XLOC_1829522	chr4	+	2	136,088,741,136,094,000	120,116
TCONS_00379057	XLOC_237114	chr10	-	2	16,453,071,645,371	38,192
TCONS_00036514	XLOC_004633	chr1	-	2	1,087,123,310,872,780	151,124
TCONS_01400729	XLOC_1015047	chr17	+	2	5,718,454,557,195,280	407,106
TCONS_01470119	XLOC_1017667	chr17	-	1	80031138	336
TCONS_00897302	XLOC_651001	chr13	+	2	6,097,250,460,973,230	261,56
TCONS_01612368	XLOC_1176802	chr19	-	1	16533368	313
TCONS_00874665	XLOC_515348	chr12	+	1	122285862	331
TCONS_01736025	XLOC_1232250	chr2	+	1	186620545	241
TCONS_01401033	XLOC_1015587	chr17	+	2	7,999,581,279,997,050	332,127
TCONS_00342104	XLOC_235767	chr10	+	1	58124402	225
TCONS_02944723	XLOC_2033045	chr5	-	1	180343671	259
TCONS_00832923	XLOC_513586	chr12	+	1	8994425	272
TCONS_01283918	XLOC_931286	chr16	+	1	22535552	333
TCONS_01182657	XLOC_846200	chr15	+	1	79099243	339
TCONS_03274726	XLOC_2393784	chr7	+	2	6,189,143,161,893,480	27,250
TCONS_01365349	XLOC_932172	chr16	+	2	7,518,245,875,182,790	83,190
TCONS_00325665	XLOC_236169	chr10	+	1	85954891	308
TCONS_02431169	XLOC_1624614	chr3	-	1	108129974	299
TCONS_00019102	XLOC_000108	chr1	+	1	2301834	317
TCONS_03809836	XLOC_2711641	chr9	+	2	7,665,109,376,704,780	280,11
TCONS_00338251	XLOC_238254	chr10	-	2	8,872,565,988,728,790	201,590
TCONS_03217959	XLOC_2217648	chr6	+	1	43398388	201
TCONS_00724254	XLOC_514220	chr12	+	1	52740827	228
TCONS_02255696	XLOC_1622582	chr3	+	3	138,823,014,138,824,000,000,000,000	159,867,93
TCONS_02770042	XLOC_2032587	chr5	-	1	147911644	211
TCONS_01741394	XLOC_1232429	chr2	+	1	202150126	204
TCONS_01275357	XLOC_932200	chr16	+	1	77236013	215
TCONS_00528624	XLOC_378993	chr11	-	2	111,740,955,111,741,000	138,259
TCONS_02729123	XLOC_1829462	chr4	+	1	128933320	217
TCONS_03989142	XLOC_2839613	chrX	+	1	121387632	311
TCONS_01626533	XLOC_1174453	chr19	+	2	1,397,615,013,991,250	101,285
TCONS_01683084	XLOC_1173907	chr19	+	1	774954	202
TCONS_02429763	XLOC_1621906	chr3	+	1	82003515	219
TCONS_01230986	XLOC_845805	chr15	+	1	58608654	206
TCONS_00482181	XLOC_237752	chr10	-	2	4,938,386,849,385,750	114,105
TCONS_02067119	XLOC_1484717	chr20	-	1	48422059	303
TCONS_01628268	XLOC_1178129	chr19	-	2	5,831,358,258,315,270	175,153
TCONS_02313126	XLOC_1622860	chr3	+	1	160956620	252
TCONS_03442448	XLOC_2394176	chr7	+	1	85456989	286
TCONS_01727440	XLOC_1234029	chr2	-	2	5,968,320,259,686,100	143,105
TCONS_03685685	XLOC_2712498	chr9	+	3	131,625,023,131,628,000,000,000,000	47,171,16
TCONS_03178530	XLOC_2218303	chr6	+	1	109548796	288
TCONS_02479008	XLOC_1624340	chr3	-	1	64366702	249
TCONS_02693518	XLOC_1828995	chr4	+	1	79512241	271
TCONS_03485666	XLOC_2559125	chr8	+	2	105,478,037,105,481,000	178,77
TCONS_01743161	XLOC_1236063	chr2	-	2	218,183,774,218,190,000	126,169
TCONS_03655271	XLOC_2561168	chr8	-	2	130,451,130,130,451,000	61,201
TCONS_01793766	XLOC_1230221	chr2	+	1	32483037	211
TCONS_03487896	XLOC_2558950	chr8	+	1	94739489	775
TCONS_02490374	XLOC_1624202	chr3	-	3	538,369,705,384,696,000,000,000	103,113,225
TCONS_01182534	XLOC_846126	chr15	+	1	75557056	275
TCONS_00456373	XLOC_235857	chr10	+	1	67572230	315
TCONS_01793331	XLOC_1229941	chr2	+	1	13769870	315
TCONS_03818118	XLOC_2712520	chr9	+	1	132089095	267
TCONS_01987777	XLOC_1236100	chr2	-	1	219858145	556
TCONS_02001334	XLOC_1234216	chr2	-	1	70489836	341
TCONS_01058376	XLOC_755077	chr14	-	1	94546099	226
TCONS_02235037	XLOC_1621216	chr3	+	2	3,213,322,632,133,940	222,69
TCONS_00679097	XLOC_375020	chr11	+	1	2313872	227
TCONS_02316024	XLOC_1625012	chr3	-	1	135875897	281
TCONS_01515442	XLOC_1094830	chr18	-	3	567,190,435,671,975,000,000,000	74,226,216
TCONS_02172030	XLOC_1547313	chr21	+	1	44173705	332
TCONS_00982447	XLOC_652272	chr13	-	1	81541075	327
TCONS_03037655	XLOC_2219996	chr6	-	2	4,468,480,544,695,680	183,22
TCONS_03669853	XLOC_2711220	chr9	+	1	33036049	243
TCONS_01302013	XLOC_931187	chr16	+	2	1,893,752,318,948,170	73,174
TCONS_01987661	XLOC_1235713	chr2	-	2	187,104,937,187,110,000	215,15
TCONS_01057783	XLOC_754640	chr14	-	1	64521617	597
TCONS_01005559	XLOC_651935	chr13	-	2	4,438,430,044,384,940	21,237
TCONS_00889337	XLOC_652532	chr13	-	2	111,148,817,111,149,000	198,104
TCONS_01672551	XLOC_1174921	chr19	+	1	33628053	225
TCONS_00044390	XLOC_008178	chr1	-	2	237,472,311,237,472,000	56,219
TCONS_03442421	XLOC_2394103	chr7	+	1	75876235	203
TCONS_01397761	XLOC_1014066	chr17	+	1	18997027	212
TCONS_00226318	XLOC_000262	chr1	+	1	8384025	246
TCONS_01257203	XLOC_845357	chr15	+	2	3,150,808,831,516,190	152,105
TCONS_00380322	XLOC_238134	chr10	-	1	77853494	302
TCONS_03487565	XLOC_2558073	chr8	+	3	194,563,311,945,989,000,000,000	28,94,92
TCONS_04046996	XLOC_2993623	chrY	-	2	462,732,463,265	220,81
TCONS_01181897	XLOC_845707	chr15	+	2	5,108,115,451,081,530	82,239
TCONS_00716178	XLOC_516712	chr12	-	1	64843908	270
TCONS_02181153	XLOC_1586442	chr22	-	1	48978459	276
TCONS_02768208	XLOC_2028132	chr4_gl000193_random	+	3	858,959,019,491,824	64,221,134
TCONS_01794372	XLOC_1230594	chr2	+	1	62661895	206
TCONS_03442424	XLOC_2394102	chr7	+	1	75928636	346
TCONS_01737182	XLOC_1235668	chr2	-	2	181,511,671,181,556,000	182,101
TCONS_01674261	XLOC_1178107	chr19	-	1	57196026	222
TCONS_01484210	XLOC_1015389	chr17	+	1	73717937	366
TCONS_00724688	XLOC_515005	chr12	+	1	106705054	333
TCONS_01495274	XLOC_1015607	chr17	+	1	80309147	248
TCONS_02047464	XLOC_1484701	chr20	-	2	4,781,979,547,823,810	133,102
TCONS_02837134	XLOC_2030800	chr5	+	1	174905886	474
TCONS_01182791	XLOC_846312	chr15	+	1	84280205	333
TCONS_00754260	XLOC_514216	chr12	+	1	52616544	298
TCONS_00537563	XLOC_378248	chr11	-	1	64125194	201
TCONS_01505362	XLOC_1092982	chr17_gl000205_random	+	1	43673	416
TCONS_02576841	XLOC_1828633	chr4	+	1	47562534	277
TCONS_01722508	XLOC_1231278	chr2	+	2	105,883,491,105,883,000	143,134
TCONS_02797078	XLOC_2033046	chr5	-	2	180,344,113,180,344,000	158,139
TCONS_01125765	XLOC_752857	chr14	+	2	3,809,470,638,101,570	66,150
TCONS_00698478	XLOC_379363	chr11	-	1	134036668	211
TCONS_02258920	XLOC_1621113	chr3	+	2	2,018,641,820,187,800	148,76
TCONS_01182272	XLOC_845986	chr15	+	1	68738022	292
TCONS_02047089	XLOC_1483643	chr20	+	2	5,114,747,651,155,290	11,215
TCONS_03688708	XLOC_2713535	chr9	-	2	7,060,040,170,603,690	101,128
TCONS_01302777	XLOC_931711	chr16	+	1	48690404	357
TCONS_00036010	XLOC_003339	chr1	+	2	187,335,371,187,342,000	40,636
TCONS_00981871	XLOC_651017	chr13	+	1	64184159	217
TCONS_00042820	XLOC_004656	chr1	-	1	11833253	274
TCONS_01020933	XLOC_754460	chr14	-	1	52710121	267
TCONS_01797078	XLOC_1232286	chr2	+	1	189870448	328
TCONS_01580304	XLOC_1093997	chr18	+	1	61259743	204
TCONS_01423189	XLOC_1014008	chr17	+	1	17186584	359
TCONS_03721298	XLOC_2714490	chr9	-	1	134422535	225
TCONS_01284245	XLOC_931840	chr16	+	1	57016333	202
TCONS_03442470	XLOC_2394272	chr7	+	1	94057379	204
TCONS_03490029	XLOC_2558000	chr8	+	1	12519381	264
TCONS_02034737	XLOC_1234188	chr2	-	1	68530893	251
TCONS_03310098	XLOC_2394203	chr7	+	1	88310814	203
TCONS_00376284	XLOC_235197	chr10	+	1	13639536	470
TCONS_02185420	XLOC_1584714	chr22	+	5	2,032,677,320,328,510,000,000,000,000,000,000,000,000	31,59,25,87,55
TCONS_01731771	XLOC_1232639	chr2	+	1	217073023	279
TCONS_03989619	XLOC_2840609	chrX	-	2	6,171,251,161,746,060	203,45
TCONS_01280140	XLOC_933242	chr16	-	2	2,974,734,729,747,950	270,36
TCONS_00025331	XLOC_003475	chr1	+	3	201,000,230,201,004,000,000,000,000	263,72,116
TCONS_01284970	XLOC_933357	chr16	-	2	3,234,356,132,343,860	195,61
TCONS_01387475	XLOC_1016041	chr17	-	1	14406941	203
TCONS_03638578	XLOC_2559514	chr8	+	1	144871111	344
TCONS_01642189	XLOC_1174365	chr19	+	1	11609225	206
TCONS_00566252	XLOC_375746	chr11	+	1	51512675	239
TCONS_00528615	XLOC_378979	chr11	-	1	111041007	334
TCONS_01644993	XLOC_1176532	chr19	-	1	10113668	444
TCONS_00533571	XLOC_376540	chr11	+	3	867,826,118,678,667,000,000,000	46,150,10
TCONS_02837474	XLOC_2031054	chr5	-	2	29,071,222,907,476	189,63
TCONS_00724831	XLOC_515290	chr12	+	1	120451757	358
TCONS_00024560	XLOC_001440	chr1	+	2	5,535,343,655,354,170	20,212
TCONS_01693564	XLOC_1176076	chr19	+	2	5,859,332,458,593,470	51,224
TCONS_01624101	XLOC_1176073	chr19	+	1	58583227	419
TCONS_01798485	XLOC_1233192	chr2	-	1	1676921	327
TCONS_03680069	XLOC_2710927	chr9	+	2	523,954,549,189	52,285
TCONS_01284580	XLOC_932418	chr16	+	1	88705812	337
TCONS_03682524	XLOC_2711638	chr9	+	3	762,183,057,622,137,000,000,000	165,168,66
TCONS_02040093	XLOC_1482951	chr20	+	1	10401797	222
TCONS_00834292	XLOC_516193	chr12	-	2	3,835,295,338,363,280	25,196
TCONS_01737071	XLOC_1235408	chr2	-	1	163030505	466
TCONS_01423610	XLOC_1014271	chr17	+	1	28836129	349
TCONS_00923907	XLOC_651664	chr13	-	1	25015441	522
TCONS_02176583	XLOC_1547646	chr21	-	2	2,676,133,926,768,760	50,229
TCONS_02749907	XLOC_1830168	chr4	-	2	873,347,873,904	139,87
TCONS_02165313	XLOC_1547950	chr21	-	4	43,221,804,432,228,700,000,000,000,000,000	78,49,66,14
TCONS_01020955	XLOC_754525	chr14	-	2	5,594,727,555,947,780	202,90
TCONS_01797554	XLOC_1232576	chr2	+	1	210705513	385
TCONS_01483396	XLOC_1013693	chr17	+	1	4618545	279
TCONS_00566227	XLOC_375714	chr11	+	1	48839205	398
TCONS_00901802	XLOC_651391	chr13	+	1	109475190	232
TCONS_02171955	XLOC_1547136	chr21	+	2	3,485,244,734,854,830	295,10
TCONS_02314690	XLOC_1624019	chr3	-	1	48622663	223
TCONS_00724533	XLOC_514700	chr12	+	1	82801658	242
TCONS_00024911	XLOC_002400	chr1	+	3	145,227,305,145,231,000,000,000,000	31,197,167
TCONS_01624455	XLOC_1176767	chr19	-	2	1,570,769,415,718,370	73,464
TCONS_01490266	XLOC_1015309	chr17	+	2	7,203,356,172,034,200	337,74
TCONS_01146353	XLOC_845579	chr15	+	1	43372689	255
TCONS_00715631	XLOC_515323	chr12	+	2	121,554,871,121,557,000	179,129
TCONS_03482906	XLOC_2558497	chr8	+	2	4,885,403,448,854,780	212,205
TCONS_01005405	XLOC_650964	chr13	+	2	5,636,056,956,361,260	175,48
TCONS_03654085	XLOC_2558316	chr8	+	3	352,337,863,529,707,000,000,000	166,85,22
TCONS_00347446	XLOC_235482	chr10	+	1	34362745	332
TCONS_02101460	XLOC_1483199	chr20	+	1	30802719	325
TCONS_02529377	XLOC_1828836	chr4	+	1	66573150	758
TCONS_02529528	XLOC_1829093	chr4	+	2	8,924,045,289,262,450	125,274
TCONS_01020747	XLOC_753878	chr14	+	1	104564762	251
TCONS_01599292	XLOC_1093882	chr18	+	1	54483516	330
TCONS_00457281	XLOC_237648	chr10	-	1	43433998	383
TCONS_00716473	XLOC_517508	chr12	-	2	123,355,565,123,363,000	43,165
TCONS_03311670	XLOC_2395198	chr7	+	1	152935904	242
TCONS_00671262	XLOC_376658	chr11	+	1	94772493	241
TCONS_02252803	XLOC_1622824	chr3	+	1	158460306	207
TCONS_01156931	XLOC_847783	chr15	-	2	7,894,492,378,947,880	90,121
TCONS_00566695	XLOC_376071	chr11	+	1	65419816	536
TCONS_02749728	XLOC_1829717	chr4	+	1	153942915	587
TCONS_01741673	XLOC_1232884	chr2	+	1	231886350	230
TCONS_02046765	XLOC_1482834	chr20	+	2	30,044,133,005,117	104,115
TCONS_03843057	XLOC_2837209	chrUn_gl000225	+	2	80,680,101,009	222,39
TCONS_03688117	XLOC_2711923	chr9	+	1	97782578	451
TCONS_02118091	XLOC_1483876	chr20	+	1	62601959	239
TCONS_00712981	XLOC_515100	chr12	+	2	110,729,865,110,733,000	64,154
TCONS_00698088	XLOC_376880	chr11	+	2	114,478,358,114,483,000	217,50
TCONS_00569936	XLOC_378481	chr11	-	1	71118923	227
TCONS_01611393	XLOC_1174187	chr19	+	1	7620989	281
TCONS_01740871	XLOC_1231442	chr2	+	1	114394693	361
TCONS_00923733	XLOC_651509	chr13	+	2	113,862,737,113,864,000	184,275
TCONS_03015739	XLOC_2219970	chr6	-	2	4,357,996,443,580,620	201,37
TCONS_01126042	XLOC_753672	chr14	+	1	98211847	230
TCONS_02529051	XLOC_1828045	chr4	+	2	781,436,781,750	218,32
TCONS_00301220	XLOC_006090	chr1	-	2	9,421,966,194,311,120	241,74
TCONS_00537492	XLOC_378064	chr11	-	1	57402187	201
TCONS_01505468	XLOC_1092982	chr17_gl000205_random	+	2	4,498,869,827	61,168
TCONS_03488549	XLOC_2561258	chr8	-	2	139,505,469,139,508,000	160,530
TCONS_00698089	XLOC_376887	chr11	+	2	115,267,473,115,267,000	67,224
TCONS_02066648	XLOC_1484332	chr20	-	2	3,043,435,030,435,530	129,157
TCONS_00833625	XLOC_514930	chr12	+	1	102330653	306
TCONS_00021835	XLOC_006168	chr1	-	2	100,253,582,100,253,000	31,221
TCONS_01621341	XLOC_1176278	chr19	-	2	36,619,023,663,551	97,153
TCONS_02189559	XLOC_1585317	chr22	+	1	41917167	285
TCONS_00481833	XLOC_236629	chr10	+	1	106898844	257
TCONS_04046096	XLOC_2993755	chrY	-	1	58853862	229
TCONS_01131778	XLOC_754291	chr14	-	2	3,611,700,336,117,590	73,128
TCONS_02466983	XLOC_1622617	chr3	+	1	141231473	301
TCONS_01302158	XLOC_931271	chr16	+	1	22218066	223
TCONS_01000009	XLOC_651541	chr13	+	3	114,579,245,114,579,000,000,000,000	15,17,183
TCONS_02836935	XLOC_2030663	chr5	+	1	163902037	263
TCONS_02267002	XLOC_1621732	chr3	+	1	61608958	228
TCONS_02310060	XLOC_1620933	chr3	+	1	9869926	434
TCONS_00345089	XLOC_236942	chr10	+	3	127,585,143,127,596,000,000,000,000	81,46,252
TCONS_02014663	XLOC_1231430	chr2	+	1	114051790	213
TCONS_00534190	XLOC_378356	chr11	-	2	6,624,540,566,247,500	162,242
TCONS_01401227	XLOC_1015951	chr17	-	2	90,612,939,065,623	73,172
TCONS_01020532	XLOC_753135	chr14	+	1	60394371	211
TCONS_01701701	XLOC_1229227	chr1_gl000192_random	-	1	15913	250
TCONS_00226231	XLOC_000107	chr1	+	3	224,841,822,490,492,000,000	32,119,66
TCONS_01490108	XLOC_1014554	chr17	+	2	3,862,436,138,624,700	50,214
TCONS_00341942	XLOC_235452	chr10	+	3	316,619,763,166,373,000,000,000	126,162,97
TCONS_00325428	XLOC_235435	chr10	+	2	3,084,071,030,840,820	90,240
TCONS_01406732	XLOC_1015989	chr17	-	1	10365808	228
TCONS_01533908	XLOC_1093342	chr18	+	1	6867798	206
TCONS_01683403	XLOC_1174482	chr19	+	1	14633571	364
TCONS_01258305	XLOC_847324	chr15	-	2	5,584,112,755,880,030	66,509
TCONS_01986011	XLOC_1230581	chr2	+	1	61818687	320
TCONS_00714880	XLOC_513421	chr12	+	2	33,571,673,357,736	213,118
TCONS_01469736	XLOC_1016930	chr17	-	2	4,601,145,146,011,800	40,196
TCONS_01796782	XLOC_1232142	chr2	+	2	177,134,175,177,161,000	222,161
TCONS_03403590	XLOC_2394543	chr7	+	1	105518619	280
TCONS_02750492	XLOC_1831791	chr4	-	3	156,589,821,156,593,000,000,000,000	240,52,76
TCONS_01941698	XLOC_1232978	chr2	+	1	234739225	306
TCONS_01722283	XLOC_1230710	chr2	+	2	6,987,169,069,880,120	347,279
TCONS_02315703	XLOC_1624795	chr3	-	1	122657694	409
TCONS_01146694	XLOC_846589	chr15	+	1	99467346	308
TCONS_02466694	XLOC_1621658	chr3	+	3	552,609,485,526,478,000,000,000	48,95,62
TCONS_00000031	XLOC_000103	chr1	+	1	2086790	313
TCONS_02530461	XLOC_1831639	chr4	-	3	143,229,226,143,231,000,000,000,000	70,98,94
TCONS_02217311	XLOC_1585206	chr22	+	1	39102492	216
TCONS_02505449	XLOC_1625090	chr3	-	1	141728147	249
TCONS_00645891	XLOC_376412	chr11	+	1	76253672	286
TCONS_02189750	XLOC_1585670	chr22	-	1	19245089	237
TCONS_02189656	XLOC_1585492	chr22	+	1	47985587	253
TCONS_01279998	XLOC_932838	chr16	-	2	1,148,553,311,485,860	185,21
TCONS_03988578	XLOC_2838532	chrX	+	2	1,390,007,613,901,480	237,108
TCONS_01181352	XLOC_845383	chr15	+	1	33823078	248
TCONS_04023582	XLOC_2838775	chrX	+	1	41213622	293
TCONS_02944555	XLOC_2032690	chr5	-	2	153,593,834,153,594,000	255,37
TCONS_02749629	XLOC_1829458	chr4	+	2	128,757,019,128,758,000	187,33
TCONS_03481666	XLOC_2560536	chr8	-	2	7,238,332,472,447,970	129,93
TCONS_00531292	XLOC_378091	chr11	-	3	586,671,395,867,162,000,000,000	92,106,176
TCONS_02312380	XLOC_1622413	chr3	+	1	128657824	289
TCONS_01375704	XLOC_930881	chr16	+	2	29,078,852,910,642	49,389
TCONS_01401365	XLOC_1016302	chr17	-	2	2,722,295,227,224,540	366,165
TCONS_02252438	XLOC_1621861	chr3	+	1	75465308	454
TCONS_02786109	XLOC_2029808	chr5	+	3	964,377,879,643,872,000,000,000	49,69,88
TCONS_00031768	XLOC_005444	chr1	-	2	4,579,495,945,795,560	150,53
TCONS_00721513	XLOC_515410	chr12	+	1	124181233	238
TCONS_03835072	XLOC_2714222	chr9	-	1	120174045	228
TCONS_03817812	XLOC_2710974	chr9	+	2	38,110,273,816,513	20,251
TCONS_01939861	XLOC_1229724	chr2	+	3	123,467,612,347,781,000,000	33,69,156
TCONS_03271779	XLOC_2395344	chr7	-	3	147,277,148,531,149,000	562,183,167
TCONS_00490880	XLOC_235747	chr10	+	1	52997943	341
TCONS_03685522	XLOC_2712168	chr9	+	1	115236470	829
TCONS_03015013	XLOC_2217422	chr6	+	1	34365305	213
TCONS_00702268	XLOC_516407	chr12	-	2	5,089,771,250,898,070	138,87
TCONS_00491005	XLOC_236387	chr10	+	1	97894678	212
TCONS_02944329	XLOC_2032280	chr5	-	1	129158013	282
TCONS_02693962	XLOC_1829779	chr4	+	1	158883316	382
TCONS_01108807	XLOC_752908	chr14	+	1	42325104	219
TCONS_00533812	XLOC_377183	chr11	+	2	130,196,403,130,196,000	70,182
TCONS_00456981	XLOC_236915	chr10	+	1	126186786	263
TCONS_00533077	XLOC_375274	chr11	+	1	14297855	276
TCONS_01035230	XLOC_752519	chr14	+	1	19521466	338
TCONS_01742767	XLOC_1235235	chr2	-	1	146502392	218
TCONS_01258027	XLOC_846844	chr15	-	2	2,948,529,829,487,310	236,137
TCONS_01795788	XLOC_1231504	chr2	+	1	120709741	377
TCONS_03310269	XLOC_2394296	chr7	+	1	95657956	342
TCONS_03688886	XLOC_2713952	chr9	-	1	101545892	342
TCONS_02836832	XLOC_2030586	chr5	+	1	157085208	236
TCONS_01730854	XLOC_1230637	chr2	+	1	65310441	215
TCONS_03638650	XLOC_2559745	chr8	-	2	78,745,447,882,354	164,145
TCONS_02738933	XLOC_1830217	chr4	-	2	22,564,752,256,733	121,148
TCONS_03312363	XLOC_2395813	chr7	-	1	32718087	239
TCONS_01619219	XLOC_1177435	chr19	-	1	42037228	488
TCONS_01618509	XLOC_1176158	chr19	-	3	108,584,410,885,721,000,000	130,147,83
TCONS_01304547	XLOC_932912	chr16	-	2	1,531,391,715,314,020	87,397
TCONS_03523869	XLOC_2559138	chr8	+	1	109482445	206
TCONS_00530186	XLOC_375401	chr11	+	6	229,427,722,303,389,000,000,000,000,000,000,000,000,000,000,000	27,54,118,204,193,454
TCONS_01425722	XLOC_1015660	chr17	-	1	516396	237
TCONS_03843436	XLOC_2837436	chrUn_gl000228	-	2	116,947,118,106	67,880
TCONS_00752951	XLOC_513369	chr12	+	1	1636130	250
TCONS_03078038	XLOC_2218066	chr6	+	1	85949787	406
TCONS_03669792	XLOC_2710996	chr9	+	1	5050133	336
TCONS_03040016	XLOC_2217530	chr6	+	1	38705853	281
TCONS_00376407	XLOC_235279	chr10	+	1	20412586	391
TCONS_02790467	XLOC_2032828	chr5	-	2	168,398,412,168,399,000	63,165
TCONS_00701586	XLOC_514194	chr12	+	1	52162285	290
TCONS_01735968	XLOC_1232131	chr2	+	1	176968510	652
TCONS_04023518	XLOC_2838408	chrX	+	2	27,055,912,705,977	75,223
TCONS_01424488	XLOC_1014875	chr17	+	1	47229945	212
TCONS_01672285	XLOC_1174392	chr19	+	1	12300323	302
TCONS_01517501	XLOC_1093886	chr18	+	1	54691742	432
TCONS_03265276	XLOC_2394741	chr7	+	2	128,315,791,128,316,000	122,80
TCONS_02535448	XLOC_1829714	chr4	+	1	153882089	201
TCONS_02187869	XLOC_1584593	chr22	+	1	17133563	242
TCONS_01684317	XLOC_1176328	chr19	-	1	4662833	345
TCONS_01672273	XLOC_1174372	chr19	+	1	11791246	217
TCONS_00721004	XLOC_514040	chr12	+	2	4,733,810,447,341,460	166,48
TCONS_00456967	XLOC_236884	chr10	+	1	124526035	283
TCONS_00569585	XLOC_378190	chr11	-	1	62506757	634
TCONS_01628253	XLOC_1178104	chr19	-	2	5,705,827,257,078,440	368,387
TCONS_00759233	XLOC_517654	chr12	-	1	130926028	294
TCONS_00533515	XLOC_376395	chr11	+	2	7,529,424,775,305,140	79,156
TCONS_02034796	XLOC_1234665	chr2	-	2	9,948,514,699,485,760	102,190
TCONS_01940146	XLOC_1230221	chr2	+	1	32482853	300
TCONS_01795840	XLOC_1231543	chr2	+	1	122992393	426
TCONS_02729716	XLOC_1831900	chr4	-	1	170446471	349
TCONS_03688170	XLOC_2712075	chr9	+	1	108062082	246
TCONS_01699951	XLOC_1177064	chr19	-	2	2,797,368,427,974,400	44,182
TCONS_01396551	XLOC_1016807	chr17	-	2	4,226,028,942,264,260	172,65
TCONS_00040317	XLOC_000125	chr1	+	2	25,861,812,586,737	276,117
TCONS_03858001	XLOC_2841090	chrX	-	2	115,827,121,115,827,000	80,171
TCONS_03034246	XLOC_2218329	chr6	+	1	110911781	203
TCONS_00697897	XLOC_375514	chr11	+	1	33605226	239
TCONS_03691815	XLOC_2713068	chr9	-	1	20413262	312
TCONS_01505907	XLOC_1092981	chr17_gl000205_random	+	1	14863	265
TCONS_01941724	XLOC_1233029	chr2	+	1	238512096	303
TCONS_01109222	XLOC_753599	chr14	+	1	94507376	312
TCONS_02478355	XLOC_1621363	chr3	+	1	42571758	337
TCONS_02255592	XLOC_1622319	chr3	+	1	123378143	226
TCONS_01275926	XLOC_933406	chr16	-	3	337,615,643,376,831,000,000,000	48,115,68
TCONS_00679799	XLOC_378470	chr11	-	2	7,014,149,470,141,850	183,121
TCONS_03481109	XLOC_2558916	chr8	+	2	9,101,366,191,017,670	128,171
TCONS_00527104	XLOC_375116	chr11	+	1	6261044	216
TCONS_01506284	XLOC_1094126	chr18	+	1	74626047	249
TCONS_01603624	XLOC_1094094	chr18	+	1	72779582	207
TCONS_03078777	XLOC_2218524	chr6	+	1	127892381	201
TCONS_01672693	XLOC_1175128	chr19	+	1	38632734	300
TCONS_03442897	XLOC_2396065	chr7	-	2	5,198,583,651,986,010	140,89
TCONS_02230466	XLOC_1585826	chr22	-	2	2,460,666,424,615,120	11,318
TCONS_02836588	XLOC_2030452	chr5	+	1	147701807	355
TCONS_01618934	XLOC_1176848	chr19	-	2	1,757,273,717,622,150	23,267
TCONS_03451445	XLOC_2394365	chr7	+	1	99445884	245
TCONS_02134123	XLOC_1547285	chr21	+	1	42954301	255
TCONS_03312705	XLOC_2396057	chr7	-	2	5,120,277,951,203,850	179,56
TCONS_01371095	XLOC_930880	chr16	+	2	28,833,502,883,483	101,212
TCONS_03857260	XLOC_2839001	chrX	+	2	5,593,506,756,029,250	166,88
TCONS_01108748	XLOC_752766	chr14	+	1	32157731	203
TCONS_00755869	XLOC_515248	chr12	+	1	117462163	222
TCONS_00457240	XLOC_237563	chr10	-	1	32140873	268
TCONS_03525354	XLOC_2560337	chr8	-	1	54882503	244
TCONS_01257913	XLOC_846533	chr15	+	2	9,437,881,294,387,450	131,132
TCONS_02128986	XLOC_1547378	chr21	+	1	45845829	339
TCONS_00982290	XLOC_651906	chr13	-	1	42144237	255
TCONS_02527146	XLOC_1831123	chr4	-	3	872,757,468,729,186,000,000,000	51,154,101
TCONS_00721269	XLOC_514743	chr12	+	1	89934440	256
TCONS_01516523	XLOC_1094988	chr18	-	2	7,452,875,574,533,970	43,210
TCONS_02581286	XLOC_1831888	chr4	-	1	169292953	269
TCONS_00679695	XLOC_378002	chr11	-	1	50097340	260
TCONS_02790292	XLOC_2032309	chr5	-	4	131,684,633,131,685,000,000,000,000,000,000,000	143,97,284,247
TCONS_00716294	XLOC_517133	chr12	-	2	102,406,765,102,411,000	205,35
TCONS_02045516	XLOC_1482847	chr20	+	1	3184488	398
TCONS_03857571	XLOC_2839872	chrX	+	1	149919516	443
TCONS_01158203	XLOC_845768	chr15	+	2	5,588,089,355,881,500	124,150
TCONS_03523510	XLOC_2558900	chr8	+	1	87556609	284
TCONS_01029542	XLOC_753057	chr14	+	3	558,487,285,584,905,000,000,000	93,126,25
TCONS_04023620	XLOC_2838890	chrX	+	2	4,887,477,348,876,150	273,104
TCONS_00671168	XLOC_376317	chr11	+	2	7,252,881,872,532,590	82,135
TCONS_03842964	XLOC_2837196	chrUn_gl000225	+	1	27083	210
TCONS_01021043	XLOC_754893	chr14	-	2	7,740,726,977,407,370	81,126
TCONS_01405691	XLOC_1014022	chr17	+	1	17655635	219
TCONS_02185714	XLOC_1585325	chr22	+	2	4,212,654,142,128,240	104,97
TCONS_02049002	XLOC_1484976	chr20	-	2	6,238,415,762,398,750	57,182
TCONS_02230224	XLOC_1585264	chr22	+	1	40433864	447
TCONS_03655397	XLOC_2561384	chr8	-	2	144,976,737,144,977,000	453,91
TCONS_01387129	XLOC_1015221	chr17	+	2	6,590,477,065,905,220	114,94
TCONS_02001517	XLOC_1235309	chr2	-	1	153883711	287
TCONS_01985996	XLOC_1230527	chr2	+	1	56599794	343
TCONS_00030739	XLOC_003093	chr1	+	3	171,816,092,171,819,000,000,000,000	155,130,75
TCONS_03718679	XLOC_2712416	chr9	+	1	129957774	630
TCONS_02315054	XLOC_1624265	chr3	-	1	57496809	269
TCONS_00287179	XLOC_007327	chr1	-	2	175,139,955,175,140,000	58,184
TCONS_01018044	XLOC_651520	chr13	+	1	114063087	247
TCONS_01303757	XLOC_932297	chr16	+	1	84168220	326
TCONS_01005650	XLOC_652467	chr13	-	2	103,277,364,103,277,000	76,213
TCONS_02034183	XLOC_1229915	chr2	+	1	11622818	313
TCONS_02131978	XLOC_1547153	chr21	+	2	3,530,346,535,308,090	191,36
TCONS_02143055	XLOC_1547032	chr21	+	1	29507382	221
TCONS_02186680	XLOC_1584660	chr22	+	1	18842739	288
TCONS_00347385	XLOC_235352	chr10	+	1	26889831	214
TCONS_00510170	XLOC_238238	chr10	-	1	87939097	271
TCONS_03670752	XLOC_2714472	chr9	-	2	133,652,935,133,653,000	196,123
TCONS_00286829	XLOC_005519	chr1	-	1	48170743	247
TCONS_03485801	XLOC_2559503	chr8	+	1	144737294	1014
TCONS_04023814	XLOC_2840072	chrX	-	3	937,339,293,753,829,000,000	14,152,92
TCONS_03079038	XLOC_2218690	chr6	+	1	142509874	333
TCONS_03860534	XLOC_2838995	chrX	+	1	55516489	549
TCONS_01627472	XLOC_1176429	chr19	-	2	76,844,347,684,632	99,447
TCONS_01506157	XLOC_1093748	chr18	+	1	42563219	316
TCONS_00337207	XLOC_235608	chr10	+	2	4,391,627,343,917,110	241,118
TCONS_03490576	XLOC_2558893	chr8	+	2	8,682,237,086,834,690	135,353
TCONS_00530935	XLOC_377045	chr11	+	2	122,933,295,122,933,000	110,162
TCONS_03275103	XLOC_2394493	chr7	+	1	102145822	239
TCONS_01423891	XLOC_1014467	chr17	+	1	36389902	290
TCONS_03864506	XLOC_2838710	chrX	+	2	3,424,231,834,249,470	137,140
TCONS_03268532	XLOC_2394807	chr7	+	3	130,999,551,131,010,000,000,000,000	422,51,59
TCONS_03611706	XLOC_2560403	chr8	-	1	61371298	255
TCONS_03719348	XLOC_2712826	chr9	+	1	140694498	231
TCONS_01627888	XLOC_1177350	chr19	-	2	3,964,498,639,646,990	207,135
TCONS_03240707	XLOC_2220598	chr6	-	2	111,280,343,111,281,000	43,183
TCONS_01154674	XLOC_846685	chr15	-	3	209,363,902,094,340,000,000,000	33,109,127
TCONS_01028791	XLOC_755112	chr14	-	2	9,599,928,896,000,850	110,217
TCONS_01371509	XLOC_932607	chr16	-	1	1938415	347
TCONS_01683536	XLOC_1174778	chr19	+	2	2,310,920,623,110,480	337,94
TCONS_01703614	XLOC_1234131	chr2	-	1	64963031	265
TCONS_02478453	XLOC_1621788	chr3	+	1	67597656	306
TCONS_01131619	XLOC_753625	chr14	+	2	9,538,400,095,384,290	117,135
TCONS_01387138	XLOC_1015237	chr17	+	1	66245286	261
TCONS_01302328	XLOC_931375	chr16	+	1	27413941	212
TCONS_01940102	XLOC_1230154	chr2	+	1	27977683	207
TCONS_01275089	XLOC_931566	chr16	+	1	31769770	235
TCONS_03843138	XLOC_2837186	chrUn_gl000225	+	3	1,340,433,629,110,520	60,90,66
TCONS_03843066	XLOC_2837223	chrUn_gl000225	-	3	67,681,401,021,382	188,69,90
TCONS_03079288	XLOC_2218850	chr6	+	1	152988705	207
TCONS_01534917	XLOC_1094019	chr18	+	1	63469719	567
TCONS_00717910	XLOC_513707	chr12	+	3	149,348,551,493,906,000,000,000	115,78,49
TCONS_01505590	XLOC_1092981	chr17_gl000205_random	+	1	25369	818
TCONS_02143366	XLOC_1547266	chr21	+	2	4,134,632,241,346,480	45,300
TCONS_03824997	XLOC_2712228	chr9	+	3	117,096,325,117,107,000,000,000,000	85,116,87
TCONS_01535619	XLOC_1094609	chr18	-	2	3,364,301,433,647,210	24,304
TCONS_03015519	XLOC_2219068	chr6	+	2	168,143,144,168,143,000	100,141
TCONS_01641604	XLOC_1173902	chr19	+	1	677567	202
TCONS_00344708	XLOC_235838	chr10	+	2	6,539,106,465,405,240	175,188
TCONS_01515037	XLOC_1093675	chr18	+	1	32827822	309
TCONS_00524649	XLOC_375634	chr11	+	1	44928341	275
TCONS_02185909	XLOC_1585799	chr22	-	3	239,157,522,391,715,000,000,000	20,119,311
TCONS_01731929	XLOC_1232994	chr2	+	2	235,887,169,235,888,000	460,317
TCONS_01184815	XLOC_847710	chr15	-	1	75668500	286
TCONS_01940253	XLOC_1230376	chr2	+	1	44004096	310
TCONS_03482810	XLOC_2558249	chr8	+	2	3,007,844,830,079,180	98,113
TCONS_01484693	XLOC_1016241	chr17	-	2	2,224,603,322,253,200	38,196
TCONS_01468353	XLOC_1014649	chr17	+	1	41138604	293
TCONS_02790553	XLOC_2033042	chr5	-	2	180,222,824,180,229,000	51,465
TCONS_02431216	XLOC_1624734	chr3	-	2	118,702,170,118,731,000	126,250
TCONS_03015329	XLOC_2218493	chr6	+	1	126027524	311
TCONS_00833532	XLOC_514718	chr12	+	1	85547038	202
TCONS_03862372	XLOC_2838820	chrX	+	3	464,049,634,642,269,000,000,000	99,93,22
TCONS_02034855	XLOC_1235061	chr2	-	1	130363709	238
TCONS_02255969	XLOC_1623339	chr3	+	3	195,723,237,195,752,000,000,000,000	49,88,174
TCONS_01939965	XLOC_1229919	chr2	+	1	11961150	201
TCONS_02267851	XLOC_1623331	chr3	+	1	195591912	215
TCONS_03655104	XLOC_2560618	chr8	-	3	825,055,258,250,581,000,000,000	33,147,24
TCONS_01693134	XLOC_1175315	chr19	+	2	4,290,130,742,929,130	69,143
TCONS_02184383	XLOC_1584967	chr22	+	2	2,921,439,729,217,950	86,197
TCONS_01386459	XLOC_1013564	chr17	+	2	456,050,456,416	106,117
TCONS_03433185	XLOC_2394763	chr7	+	1	128850550	218
TCONS_01612068	XLOC_1175943	chr19	+	1	55619084	321
TCONS_00101441	XLOC_007940	chr1	-	1	224409721	205
TCONS_01683527	XLOC_1174727	chr19	+	2	2,120,347,721,203,820	132,92
TCONS_01683225	XLOC_1174127	chr19	+	1	5726829	299
TCONS_01796062	XLOC_1231673	chr2	+	1	132346099	249
TCONS_01645086	XLOC_1176591	chr19	-	1	11554856	313
TCONS_02267400	XLOC_1622502	chr3	+	1	133119804	241
TCONS_01055340	XLOC_752982	chr14	+	1	50593490	336
TCONS_01303157	XLOC_931939	chr16	+	1	66433005	402
TCONS_01275227	XLOC_931954	chr16	+	2	6,689,703,366,924,110	20,419
TCONS_00026251	XLOC_005874	chr1	-	2	7,563,584,975,638,260	35,173
TCONS_02224679	XLOC_1585607	chr22	-	1	17724886	325
TCONS_00999719	XLOC_650520	chr13	+	1	25760090	323
TCONS_03311811	XLOC_2395322	chr7	+	3	158,684,754,158,692,000,000,000,000	82,123,16
TCONS_02770188	XLOC_2033006	chr5	-	1	179052512	269
TCONS_03010805	XLOC_2030842	chr5	+	1	176449925	304
TCONS_02197807	XLOC_1585106	chr22	+	1	35660107	358
TCONS_00229641	XLOC_006376	chr1	-	1	115098551	334
TCONS_01182504	XLOC_846110	chr15	+	2	7,491,159,874,912,300	91,147
TCONS_01302665	XLOC_931618	chr16	+	2	3,354,329,933,545,470	292,54
TCONS_03485142	XLOC_2557962	chr8	+	1	11141087	288
TCONS_02749827	XLOC_1829976	chr4	+	1	183808433	379
TCONS_03838173	XLOC_2834721	chr9_gl000199_random	-	2	4,341,949,732	27,263
TCONS_03844470	XLOC_2837988	chrUn_gl000239	-	2	2,751,628,125	330,32
TCONS_04023685	XLOC_2839292	chrX	+	2	8,939,004,989,390,200	19,207
TCONS_01018157	XLOC_652517	chr13	-	2	110,141,246,110,141,000	60,296
TCONS_00687604	XLOC_378242	chr11	-	2	6,398,993,463,990,350	279,19
TCONS_01735086	XLOC_1229748	chr2	+	4	1,747,546,175,507,610,000,000,000,000	77,170,124,95
TCONS_02174430	XLOC_1548088	chr21	-	2	4,694,431,146,944,740	130,170
TCONS_00031211	XLOC_004168	chr1	+	3	238,486,497,238,487,000,000,000,000	11,202,37
TCONS_01278034	XLOC_933907	chr16	-	2	7,300,046,073,081,650	44,341
TCONS_01629696	XLOC_1173980	chr19	+	1	1974808	327
TCONS_01108599	XLOC_752502	chr14	+	2	1,902,124,519,021,650	66,332
TCONS_00679380	XLOC_376343	chr11	+	1	73390846	248
TCONS_00833392	XLOC_514462	chr12	+	2	6,312,051,763,127,120	272,19
TCONS_00896497	XLOC_651905	chr13	-	2	4,236,159,442,367,570	85,138
TCONS_02467366	XLOC_1623810	chr3	-	1	38202383	390
TCONS_02256606	XLOC_1624916	chr3	-	2	129,108,679,129,112,000	260,54
TCONS_00536726	XLOC_376402	chr11	+	1	75508932	309
TCONS_00513282	XLOC_375319	chr11	+	1	17620813	342
TCONS_03485295	XLOC_2558249	chr8	+	3	300,778,833,007,840,000,000,000	61,140,147
TCONS_00021022	XLOC_004365	chr1	-	5	857,465,858,051,858,000,000,000,000,000	424,64,131,65,55
TCONS_01005682	XLOC_652618	chr13	-	1	114489212	291
TCONS_01349997	XLOC_933368	chr16	-	1	32558012	207
TCONS_01406448	XLOC_1015478	chr17	+	1	76899799	337
TCONS_00482234	XLOC_237905	chr10	-	1	63676840	347
TCONS_01267573	XLOC_931744	chr16	+	1	50726495	310
TCONS_02034664	XLOC_1233533	chr2	-	2	2,537,140,125,371,950	130,84
TCONS_03690773	XLOC_2711079	chr9	+	1	15919922	271
TCONS_00319315	XLOC_000132	chr1	+	2	26,008,532,606,165	134,108
TCONS_02067121	XLOC_1484720	chr20	-	1	48627041	568
TCONS_00536369	XLOC_375746	chr11	+	1	51512834	588
TCONS_02531922	XLOC_1828605	chr4	+	2	4,215,338,942,212,390	191,90
TCONS_00858422	XLOC_514513	chr12	+	2	6,655,457,666,554,710	95,143
TCONS_00036993	XLOC_005967	chr1	-	1	85647484	240
TCONS_01375826	XLOC_931103	chr16	+	2	1,423,439,714,243,230	220,142
TCONS_01425672	XLOC_1015614	chr17	+	1	80436292	224
TCONS_03862393	XLOC_2838875	chrX	+	1	48421010	511
TCONS_03041117	XLOC_2219482	chr6	-	1	15351817	301
TCONS_03177874	XLOC_2217075	chr6	+	1	15189765	273
TCONS_03078717	XLOC_2218486	chr6	+	1	125402726	201
TCONS_03682536	XLOC_2711679	chr9	+	1	79929091	236
TCONS_00897339	XLOC_651170	chr13	+	3	824,169,338,242,285,000,000,000	22,118,115
TCONS_01265516	XLOC_847814	chr15	-	1	81231891	203
TCONS_00571062	XLOC_379370	chr11	-	2	134,263,621,134,281,000	90,132
TCONS_02228057	XLOC_1586509	chr22	-	2	5,108,672,251,090,490	36,198
TCONS_00347381	XLOC_235347	chr10	+	1	26780886	337
TCONS_02526800	XLOC_1830002	chr4	+	2	184,981,066,184,985,000	180,60
TCONS_02048350	XLOC_1483249	chr20	+	4	32,150,132,321,816,700,000,000,000,000,000	348,74,115,30
TCONS_02267662	XLOC_1622985	chr3	+	1	175803341	233
TCONS_03824421	XLOC_2711033	chr9	+	2	67,163,816,717,872	235,30
TCONS_01516421	XLOC_1094658	chr18	-	3	413,585,834,135,929,000,000,000	73,65,505
TCONS_02577065	XLOC_1828783	chr4	+	1	57414679	207
TCONS_02729246	XLOC_1829957	chr4	+	1	179763001	256
TCONS_01723457	XLOC_1233402	chr2	-	3	152,203,791,522,398,000,000,000	29,55,162
TCONS_01740567	XLOC_1230925	chr2	+	1	85630390	230
TCONS_02580687	XLOC_1831380	chr4	-	1	115760163	312
TCONS_02217377	XLOC_1585322	chr22	+	1	42017551	250
TCONS_02576147	XLOC_1828139	chr4	+	1	3210102	245
TCONS_01146377	XLOC_845628	chr15	+	2	4,525,405,945,254,660	116,87
TCONS_02051388	XLOC_1483588	chr20	+	1	47956298	441
TCONS_04043664	XLOC_2993667	chrY	-	1	1905888	319
TCONS_00566796	XLOC_376141	chr11	+	2	6,652,651,466,529,670	53,149
TCONS_00645706	XLOC_376109	chr11	+	1	66025729	257
TCONS_03034446	XLOC_2218868	chr6	+	1	155155719	419
TCONS_01181021	XLOC_845174	chr15	+	1	22891803	210
TCONS_02001116	XLOC_1233035	chr2	+	1	238925300	266
TCONS_01280490	XLOC_934178	chr16	-	2	8,888,043,688,888,490	497,10
TCONS_03491298	XLOC_2560441	chr8	-	1	65449489	269
TCONS_00099084	XLOC_006153	chr1	-	1	98378825	208
TCONS_02135040	XLOC_1547368	chr21	+	1	45682459	273
TCONS_01400329	XLOC_1014110	chr17	+	1	20218562	1330
TCONS_00701546	XLOC_514105	chr12	+	1	49642459	261
TCONS_01029783	XLOC_753561	chr14	+	1	92630994	228
TCONS_02014009	XLOC_1230118	chr2	+	1	27289857	245
TCONS_02197015	XLOC_1584583	chr22	+	1	16473685	273
TCONS_02466837	XLOC_1622221	chr3	+	1	119101667	234
TCONS_00702034	XLOC_515519	chr12	+	1	130742698	500
TCONS_04029642	XLOC_2841117	chrX	-	1	118739910	462
TCONS_03610540	XLOC_2558101	chr8	+	2	2,190,644,921,924,340	286,48
TCONS_03683161	XLOC_2713036	chr9	-	5	1,890,109,218,904,860,000,000,000,000,000,000,000,000	14,86,37,83,103
TCONS_03040306	XLOC_2217995	chr6	+	1	78245116	279
TCONS_00000050	XLOC_000147	chr1	+	1	2622285	231
TCONS_02523915	XLOC_1828204	chr4	+	1	6272181	201
TCONS_01303349	XLOC_932033	chr16	+	1	68863174	220
TCONS_03481329	XLOC_2559518	chr8	+	3	144,911,538,144,912,000,000,000,000	36,193,76
TCONS_00859254	XLOC_516960	chr12	-	1	89222209	309
TCONS_02535373	XLOC_1829603	chr4	+	1	144883880	357
TCONS_01534054	XLOC_1093428	chr18	+	1	12324697	231
TCONS_04043239	XLOC_2993509	chrY	+	2	28,710,553,067,540	203,657
TCONS_02997131	XLOC_2031854	chr5	-	2	7,950,111,779,551,710	62,162
TCONS_00298331	XLOC_000299	chr1	+	2	99,695,009,980,818	160,62
TCONS_01020672	XLOC_753653	chr14	+	1	96858661	261
TCONS_03718176	XLOC_2712047	chr9	+	1	105764062	229
TCONS_00567706	XLOC_376789	chr11	+	1	109138391	238
TCONS_01020520	XLOC_753106	chr14	+	1	58678268	301
TCONS_00537068	XLOC_377047	chr11	+	1	122998898	227
TCONS_01377418	XLOC_934181	chr16	-	1	88940271	262
TCONS_01515261	XLOC_1094324	chr18	-	2	93,190,069,321,742	173,33
TCONS_03218425	XLOC_2220005	chr6	-	1	45608581	258
TCONS_02467529	XLOC_1624105	chr3	-	1	50283677	593
TCONS_03810110	XLOC_2712416	chr9	+	1	129957646	341
TCONS_01517275	XLOC_1093462	chr18	+	1	13771401	384
TCONS_00897171	XLOC_650661	chr13	+	3	350,036,123,501,895,000,000,000	79,138,211
TCONS_00025155	XLOC_003006	chr1	+	2	167,381,516,167,382,000	25,182
TCONS_03897072	XLOC_2838746	chrX	+	1	38679445	362
TCONS_01721993	XLOC_1230103	chr2	+	1	26800536	299
TCONS_02529963	XLOC_1830215	chr4	-	2	21,193,482,123,839	213,146
TCONS_03442360	XLOC_2393837	chr7	+	1	64151288	336
TCONS_01723776	XLOC_1234125	chr2	-	2	6,472,797,464,731,530	133,987
TCONS_03610987	XLOC_2558810	chr8	+	1	79697103	334
TCONS_01231247	XLOC_846264	chr15	+	1	82381203	328
TCONS_01534828	XLOC_1093953	chr18	+	1	58205643	307
TCONS_01940961	XLOC_1231659	chr2	+	1	132010803	209
TCONS_01609541	XLOC_1093237	chr18	+	2	108,123,108,362	172,78
TCONS_03838358	XLOC_2834792	chrM	-	1	1502	1444
TCONS_01941076	XLOC_1231931	chr2	+	1	159683634	402
TCONS_02185522	XLOC_1584925	chr22	+	2	2,629,386,226,294,270	123,132
TCONS_03218024	XLOC_2217995	chr6	+	1	78245023	278
TCONS_03245077	XLOC_2391107	chr6_dbb_hap3	-	2	29,050,792,913,676	49,343
TCONS_03825368	XLOC_2712903	chr9	-	2	43,470,794,348,231	104,149
TCONS_03841731	XLOC_2836452	chrUn_gl000220	-	2	112,918,156,579	92,305
TCONS_02050988	XLOC_1482913	chr20	+	1	6453757	251
TCONS_01146751	XLOC_846771	chr15	-	1	24657941	219
TCONS_01642712	XLOC_1174764	chr19	+	1	22653781	227
TCONS_01156464	XLOC_846733	chr15	-	2	2,302,132,323,034,120	106,96
TCONS_03468200	XLOC_2557503	chr7_gl000195_random	-	2	4,876,686,517	353,139
TCONS_03311905	XLOC_2395422	chr7	-	1	2631621	311
TCONS_00646780	XLOC_378146	chr11	-	2	6,133,910,761,348,260	69,148
TCONS_02316902	XLOC_1625766	chr3	-	2	195,306,218,195,307,000	148,96
TCONS_02142785	XLOC_1546875	chr21	+	1	10097626	451
TCONS_00527454	XLOC_376019	chr11	+	1	64328954	339
TCONS_03433797	XLOC_2396805	chr7	-	2	100,637,606,100,640,000	91,124
TCONS_00874687	XLOC_515378	chr12	+	2	123,144,338,123,145,000	69,156
TCONS_03040322	XLOC_2218021	chr6	+	1	80970370	339
TCONS_02750471	XLOC_1831732	chr4	-	3	152,274,413,152,326,000,000,000,000	130,86,210
TCONS_01623040	XLOC_1174138	chr19	+	1	6012425	225
TCONS_00901507	XLOC_650859	chr13	+	1	49398156	321
TCONS_00001710	XLOC_005314	chr1	-	2	3,945,042,339,450,880	35,229
TCONS_00509933	XLOC_236641	chr10	+	1	109971369	206
TCONS_03310922	XLOC_2394732	chr7	+	1	128106473	249
TCONS_01580293	XLOC_1093979	chr18	+	1	60224290	288
TCONS_03248409	XLOC_2395471	chr7	-	1	5363467	289
TCONS_01683667	XLOC_1175045	chr19	+	1	36557691	373
TCONS_01724148	XLOC_1235334	chr2	-	3	157,045,166,157,108,000,000,000,000	110,93,170
TCONS_01398704	XLOC_1016235	chr17	-	3	216,880,362,171,661,000,000,000	89,46,148
TCONS_01612122	XLOC_1176063	chr19	+	1	58367769	278
TCONS_01035477	XLOC_752987	chr14	+	1	50951152	293
TCONS_03843046	XLOC_2837199	chrUn_gl000225	+	3	382,884,488,960,250	164,71,179
TCONS_00901858	XLOC_651497	chr13	+	1	113771499	212
TCONS_01617479	XLOC_1174387	chr19	+	1	12189782	387
TCONS_03817851	XLOC_2711184	chr9	+	2	2,670,262,326,756,640	194,10
TCONS_01673717	XLOC_1176910	chr19	-	1	19408321	348
TCONS_03787845	XLOC_2711998	chr9	+	1	101798096	296
TCONS_02217468	XLOC_1585495	chr22	+	2	4,830,373,548,372,520	574,10
TCONS_01397675	XLOC_1013840	chr17	+	1	8398089	244
TCONS_01158987	XLOC_847398	chr15	-	3	613,177,036,131,907,000,000,000	43,127,91
TCONS_01371817	XLOC_934199	chr16	-	3	892,715,538,927,209,000,000,000	175,61,14
TCONS_02532311	XLOC_1829789	chr4	+	3	159,593,437,159,600,000,000,000,000	205,230,75
TCONS_03080263	XLOC_2219568	chr6	-	1	22136947	298
TCONS_00645295	XLOC_375313	chr11	+	1	17317086	203
TCONS_03178397	XLOC_2218022	chr6	+	1	80836473	223
TCONS_02260953	XLOC_1625495	chr3	-	3	177,924,428,177,942,000,000,000,000	213,67,18
TCONS_00536137	XLOC_375319	chr11	+	1	17592112	294
TCONS_02763594	XLOC_1830571	chr4	-	3	362,578,943,631,331,000,000,000	82,99,76
TCONS_00457430	XLOC_237999	chr10	-	2	7,133,880,271,339,530	97,117
TCONS_03841790	XLOC_2836452	chrUn_gl000220	-	2	126,697,133,113	21,951,924
TCONS_01683674	XLOC_1175050	chr19	+	1	36632459	227
TCONS_01580087	XLOC_1093654	chr18	+	1	29786745	216
TCONS_01735096	XLOC_1229801	chr2	+	2	40,684,564,069,971	137,98
TCONS_00679461	XLOC_376788	chr11	+	1	108920397	254
TCONS_01730577	XLOC_1230118	chr2	+	1	27290095	262
TCONS_02051166	XLOC_1483223	chr20	+	1	31545971	219
TCONS_02692989	XLOC_1828059	chr4	+	1	1025200	494
TCONS_00698462	XLOC_379285	chr11	-	1	126919472	267
TCONS_01277493	XLOC_932417	chr16	+	1	88690654	252
TCONS_03646085	XLOC_2557843	chr8	+	1	6338410	251
TCONS_01730675	XLOC_1230298	chr2	+	2	3,822,355,638,224,550	162,85
TCONS_01674023	XLOC_1177632	chr19	-	2	4,695,045,246,950,620	151,119
TCONS_00320075	XLOC_004918	chr1	-	1	22869012	326
TCONS_01502470	XLOC_1014509	chr17	+	1	37785973	229
TCONS_01505607	XLOC_1092984	chr17_gl000205_random	+	1	110017	247
TCONS_00566028	XLOC_375582	chr11	+	1	40882123	232
TCONS_00568644	XLOC_377390	chr11	-	2	46,244,184,629,256	152,175
TCONS_01406040	XLOC_1014644	chr17	+	1	41053131	334
TCONS_01722430	XLOC_1231085	chr2	+	2	9,606,846,896,071,020	152,124
TCONS_03490362	XLOC_2558521	chr8	+	3	526,090,395,260,924,000,000,000	175,21,15
TCONS_03687817	XLOC_2711242	chr9	+	1	33702858	1147
TCONS_01349773	XLOC_932770	chr16	-	2	62,268,136,229,308	391,10
TCONS_01494856	XLOC_1014857	chr17	+	1	46807245	250
TCONS_02180843	XLOC_1585327	chr22	+	1	42174886	273
TCONS_00029485	XLOC_000385	chr1	+	1	12677919	489
TCONS_01630890	XLOC_1176486	chr19	-	1	8857716	297
TCONS_00721505	XLOC_515395	chr12	+	2	123,728,106,123,728,000	81,384
TCONS_03864796	XLOC_2839244	chrX	+	1	79981195	227
TCONS_00000280	XLOC_000850	chr1	+	2	2,875,974,228,760,330	271,56
TCONS_01799692	XLOC_1234075	chr2	-	1	62108098	331
TCONS_03029340	XLOC_2219788	chr6	-	2	3,448,988,234,504,040	199,28
TCONS_01730498	XLOC_1229941	chr2	+	4	13,677,810,137,491,800,000,000,000,000,000	328,106,39,34
TCONS_01489964	XLOC_1013875	chr17	+	1	10636779	202
TCONS_03227995	XLOC_2219986	chr6	-	3	441,062,234,410,724,000,000,000	53,117,66
TCONS_01621190	XLOC_1176012	chr19	+	2	5,698,954,957,005,530	1,971,262
TCONS_02836569	XLOC_2030438	chr5	+	1	147154048	238
TCONS_01125898	XLOC_753321	chr14	+	1	71857258	215
TCONS_02787185	XLOC_2032857	chr5	-	2	171,273,171,171,274,000	168,63
TCONS_03041182	XLOC_2219758	chr6	-	1	33470837	327
TCONS_00530702	XLOC_376502	chr11	+	2	8,449,000,284,492,680	185,109
TCONS_03720691	XLOC_2713995	chr9	-	1	105018825	244
TCONS_00524398	XLOC_374954	chr11	+	1	696107	234
TCONS_00999741	XLOC_650572	chr13	+	1	28562307	276
TCONS_00000045	XLOC_000127	chr1	+	2	25,902,202,613,229	210,16
TCONS_01733014	XLOC_1235781	chr2	-	4	195,246,101,195,246,000,000,000,000,000,000,000	55,50,120,109
TCONS_02942578	XLOC_2028709	chr5	+	1	1920299	341
TCONS_03267864	XLOC_2393430	chr7	+	1	32796735	341
TCONS_03842517	XLOC_2836989	chrUn_gl000224	+	1	36803	233
TCONS_00866966	XLOC_515426	chr12	+	2	124,613,470,124,614,000	118,207
TCONS_01793778	XLOC_1230228	chr2	+	1	32625032	223
TCONS_00524926	XLOC_376073	chr11	+	2	6,543,288,965,438,890	125,107
TCONS_01506109	XLOC_1093590	chr18	+	1	23055737	341
TCONS_01425458	XLOC_1015471	chr17	+	1	76391794	440
TCONS_02525230	XLOC_1832092	chr4	-	2	186,651,829,186,655,000	146,55
TCONS_01797095	XLOC_1232292	chr2	+	2	190,491,978,190,495,000	190,11
TCONS_00377045	XLOC_235729	chr10	+	1	51531575	201
TCONS_01265240	XLOC_846029	chr15	+	1	72101061	247
TCONS_02728755	XLOC_1828154	chr4	+	1	3486645	323
TCONS_02738829	XLOC_1829617	chr4	+	1	146105845	313
TCONS_00756161	XLOC_515451	chr12	+	1	125592428	301
TCONS_00570759	XLOC_379133	chr11	-	2	118,857,042,118,858,000	52,305
TCONS_03988796	XLOC_2838937	chrX	+	2	5,165,116,551,651,400	209,71
TCONS_00533873	XLOC_377393	chr11	-	2	46,829,744,699,303	120,237
TCONS_01693137	XLOC_1175315	chr19	+	2	4,290,573,142,912,400	68,151
TCONS_01794638	XLOC_1230753	chr2	+	1	71817012	292
TCONS_00298195	XLOC_000043	chr1	+	2	10,986,171,099,014	21,223
TCONS_01502744	XLOC_1016034	chr17	-	2	1,374,499,413,745,580	53,208
TCONS_02466563	XLOC_1621462	chr3	+	1	47521905	216
TCONS_03682922	XLOC_2712527	chr9	+	2	132,258,135,132,265,000	232,199
TCONS_03810966	XLOC_2714536	chr9	-	2	136,223,014,136,223,000	161,81
TCONS_02014076	XLOC_1230222	chr2	+	1	32531989	219
TCONS_00513390	XLOC_375679	chr11	+	1	47343626	331
TCONS_01028321	XLOC_754068	chr14	-	2	2,197,605,421,979,260	323,221
TCONS_01284601	XLOC_932443	chr16	+	1	89269021	273
TCONS_00325430	XLOC_235450	chr10	+	1	31548338	338
TCONS_02102085	XLOC_1484310	chr20	-	2	2,614,893,626,149,310	75,159
TCONS_03079109	XLOC_2218723	chr6	+	1	145131658	272
TCONS_03490805	XLOC_2559301	chr8	+	1	127765481	208
TCONS_03834633	XLOC_2710925	chr9	+	1	342223	243
TCONS_00999690	XLOC_650407	chr13	+	2	2,035,374,220,354,040	78,204
TCONS_01161228	XLOC_847976	chr15	-	3	903,160,869,031,816,000,000,000	209,116,126
TCONS_02197493	XLOC_1584920	chr22	+	1	25905166	381
TCONS_00270322	XLOC_000463	chr1	+	1	16094594	252
TCONS_01163664	XLOC_847485	chr15	-	1	65115375	212
TCONS_02000858	XLOC_1231892	chr2	+	1	155917109	203
TCONS_01467798	XLOC_1013794	chr17	+	1	7484415	224
TCONS_01162696	XLOC_845636	chr15	+	1	45553868	280
TCONS_00686285	XLOC_375529	chr11	+	3	346,991,513,470,677,000,000,000	52,167,166
TCONS_03860597	XLOC_2839176	chrX	+	2	7,322,027,873,224,100	53,245
TCONS_01125733	XLOC_752744	chr14	+	1	29650009	300
TCONS_00866814	XLOC_514773	chr12	+	2	9,289,150,192,938,930	188,19
TCONS_00101399	XLOC_007912	chr1	-	1	222885166	255
TCONS_03842918	XLOC_2837197	chrUn_gl000225	+	1	44184	264
TCONS_01701856	XLOC_1229238	chr1_gl000192_random	-	1	407037	306
TCONS_00002406	XLOC_008000	chr1	-	2	227,481,377,227,481,000	107,99
TCONS_01230913	XLOC_845687	chr15	+	1	49517368	310
TCONS_01267968	XLOC_933042	chr16	-	1	21494413	262
TCONS_00922944	XLOC_650936	chr13	+	1	53204435	335
TCONS_00570626	XLOC_379046	chr11	-	1	114596150	214
TCONS_03843063	XLOC_2837222	chrUn_gl000225	-	2	624,411,551	303,23
TCONS_01629889	XLOC_1174445	chr19	+	1	13570763	223
TCONS_00337213	XLOC_235630	chr10	+	2	4,541,634,645,423,360	304,17
TCONS_03838020	XLOC_2834702	chr9_gl000199_random	+	2	4,893,161,177	167,208
TCONS_02509733	XLOC_1828166	chr4	+	1	3680078	213
TCONS_01364831	XLOC_931124	chr16	+	2	1,506,898,815,071,150	89,115
TCONS_03271871	XLOC_2395626	chr7	-	2	2,068,161,220,743,490	189,23
TCONS_00898900	XLOC_651352	chr13	+	2	103,452,921,103,453,000	164,115
TCONS_03034910	XLOC_2220219	chr6	-	2	7,112,252,871,123,890	237,73
TCONS_01732000	XLOC_1233123	chr2	+	3	242,627,287,242,629,000,000,000,000	190,816,33
TCONS_02101974	XLOC_1484062	chr20	-	2	84,741,338,474,547	183,84
TCONS_01182650	XLOC_846195	chr15	+	1	78883322	308
TCONS_01035962	XLOC_753846	chr14	+	1	103864855	354
TCONS_01424384	XLOC_1014810	chr17	+	1	45665660	213
TCONS_00859397	XLOC_517374	chr12	-	2	116,938,397,116,938,000	105,141
TCONS_01184243	XLOC_847318	chr15	-	2	5,547,425,955,475,510	164,140
TCONS_02143490	XLOC_1547345	chr21	+	1	45111718	209
TCONS_01533926	XLOC_1093348	chr18	+	1	8204334	217
TCONS_04023717	XLOC_2839485	chrX	+	1	109312416	320
TCONS_00025750	XLOC_004618	chr1	-	3	99,966,481,000,268,100,000,000	37,159,81
TCONS_02164894	XLOC_1546992	chr21	+	1	24734885	314
TCONS_00342576	XLOC_236853	chr10	+	2	122,814,922,122,829,000	130,153
TCONS_02259578	XLOC_1622422	chr3	+	1	128920610	235
TCONS_03442711	XLOC_2395240	chr7	+	2	155,684,750,155,684,000	15,231
TCONS_01156273	XLOC_846171	chr15	+	2	7,794,049,977,943,670	173,135
TCONS_03824658	XLOC_2711535	chr9	+	1	69107494	566
TCONS_03209714	XLOC_2218914	chr6	+	2	158,642,338,158,642,000	87,194
TCONS_01156355	XLOC_846385	chr15	+	2	8,878,759,388,789,170	237,41
TCONS_01730505	XLOC_1229941	chr2	+	2	1,389,230,913,892,990	47,409
TCONS_02942597	XLOC_2028760	chr5	+	1	5495950	348
TCONS_02267833	XLOC_1623310	chr3	+	2	195,226,791,195,228,000	33,224
TCONS_00499598	XLOC_238882	chr10	-	4	130,458,626,130,483,000,000,000,000,000,000,000	6,611,625,192,141
TCONS_01673209	XLOC_1176023	chr19	+	1	57157610	225
TCONS_01699950	XLOC_1177058	chr19	-	2	2,773,190,727,740,150	110,99
TCONS_01011063	XLOC_651739	chr13	-	1	28769279	204
TCONS_01425625	XLOC_1015579	chr17	+	2	7,986,740,679,868,460	68,233
TCONS_01402803	XLOC_1013709	chr17	+	3	489,053,548,917,104,000,000	36,177,72
TCONS_01694037	XLOC_1176943	chr19	-	1	20695981	219
TCONS_00697818	XLOC_374982	chr11	+	2	11,114,431,111,895	112,206
TCONS_03040905	XLOC_2219061	chr6	+	1	167837696	318
TCONS_00377109	XLOC_235759	chr10	+	1	56200169	207
TCONS_01252933	XLOC_846122	chr15	+	1	75375791	221
TCONS_03217849	XLOC_2217177	chr6	+	2	2,394,899,523,949,450	100,117
TCONS_00923103	XLOC_651062	chr13	+	1	70905586	487
TCONS_02256724	XLOC_1625196	chr3	-	3	150,291,852,150,300,000,000,000,000	94,134,227
TCONS_01403115	XLOC_1014575	chr17	+	1	39697145	266
TCONS_01798860	XLOC_1233472	chr2	-	1	20791151	282
TCONS_01031420	XLOC_752855	chr14	+	3	380,335,233,804,903,000,000,000	44,41,167
TCONS_02504896	XLOC_1621357	chr3	+	1	42121048	268
TCONS_01162714	XLOC_845685	chr15	+	1	49239637	329
TCONS_00679169	XLOC_375468	chr11	+	1	30619183	252
TCONS_00230589	XLOC_008294	chr1	-	2	246,648,111,246,648,000	60,216
TCONS_02310540	XLOC_1621267	chr3	+	2	3,618,088,036,180,970	71,144
TCONS_00498271	XLOC_235838	chr10	+	2	6,539,776,865,405,240	155,173
TCONS_00755975	XLOC_515330	chr12	+	1	121857351	304
TCONS_00347192	XLOC_234957	chr10	+	1	707582	213
TCONS_01673820	XLOC_1177147	chr19	-	1	34671338	244
TCONS_02263491	XLOC_1623165	chr3	+	1	185350822	455
TCONS_03843154	XLOC_2837223	chrUn_gl000225	-	3	6,782,108,183,111,180	174,204,54
TCONS_03839208	XLOC_2835265	chrUn_gl000213	+	1	139634	281
TCONS_02534968	XLOC_1828920	chr4	+	1	74277314	209
TCONS_02795844	XLOC_2030392	chr5	+	1	142601248	462
TCONS_01724533	XLOC_1236333	chr2	-	2	235,742,514,235,742,000	158,88
TCONS_02466658	XLOC_1621597	chr3	+	1	52283461	209
TCONS_01404156	XLOC_1017206	chr17	-	2	6,190,453,161,904,720	53,266
TCONS_01631117	XLOC_1177058	chr19	-	3	277,319,182,773,302,000,000,000	99,40,101
TCONS_01743219	XLOC_1236190	chr2	-	1	226722763	295
TCONS_03818373	XLOC_2713926	chr9	-	1	100291122	346
TCONS_01506295	XLOC_1094151	chr18	+	2	7,710,422,477,104,440	130,166
TCONS_00530623	XLOC_376348	chr11	+	1	73582285	780
TCONS_03896774	XLOC_2838534	chrX	+	1	13943587	400
TCONS_01642201	XLOC_1174374	chr19	+	1	11787310	438
TCONS_03526449	XLOC_2561199	chr8	-	1	133107516	243
TCONS_02268015	XLOC_1623656	chr3	-	2	2,141,969,821,424,390	56,162
TCONS_03683013	XLOC_2712699	chr9	+	2	137,743,953,137,744,000	269,33
TCONS_01594583	XLOC_1094151	chr18	+	2	7,703,616,377,037,050	126,147
TCONS_01468436	XLOC_1014794	chr17	+	1	45045927	238
TCONS_01623088	XLOC_1174226	chr19	+	1	8330334	368
TCONS_00527413	XLOC_375933	chr11	+	3	624,741,296,247,466,000,000,000	46,156,13
TCONS_00724822	XLOC_515273	chr12	+	1	119583608	227
TCONS_03719255	XLOC_2712759	chr9	+	1	139667908	293
TCONS_02184701	XLOC_1585645	chr22	-	2	1,876,274,118,766,240	1,244
TCONS_03041139	XLOC_2219546	chr6	-	1	20073300	315
TCONS_03841624	XLOC_2836451	chrUn_gl000220	-	2	6,787,168,093	174,95
TCONS_01468198	XLOC_1014427	chr17	+	1	34952992	389
TCONS_01154503	XLOC_846292	chr15	+	1	83504067	1069
TCONS_01513955	XLOC_1094183	chr18	+	1	77867611	300
TCONS_03787482	XLOC_2711305	chr9	+	1	35742376	555
TCONS_02789852	XLOC_2031309	chr5	-	3	294,755,692,947,683,000,000,000	139,262,89
TCONS_03031178	XLOC_2218179	chr6	+	2	9,827,157,798,275,920	54,148
TCONS_01183257	XLOC_846589	chr15	+	1	99192947	255
TCONS_01375975	XLOC_931373	chr16	+	1	27377446	277
TCONS_02529643	XLOC_1829366	chr4	+	2	119,645,823,119,649,000	79,160
TCONS_03720332	XLOC_2713716	chr9	-	1	88073053	364
TCONS_01703423	XLOC_1233266	chr2	-	1	6571852	320
TCONS_01689721	XLOC_1177719	chr19	-	2	4,902,631,249,027,170	192,48
TCONS_01283647	XLOC_930831	chr16	+	1	2221614	202
TCONS_03469462	XLOC_2561052	chr8	-	2	123,034,716,123,034,000	163,138
TCONS_01800399	XLOC_1234659	chr2	-	1	99260658	606
TCONS_01349495	XLOC_932309	chr16	+	1	84542540	325
TCONS_02217221	XLOC_1585060	chr22	+	1	32307179	346
TCONS_01727437	XLOC_1234018	chr2	-	3	581,136,405,811,807,000,000,000	151,64,44
TCONS_02310451	XLOC_1621199	chr3	+	1	30730012	268
TCONS_01599258	XLOC_1093670	chr18	+	1	32084766	336
TCONS_01143928	XLOC_752931	chr14	+	1	45649434	213
TCONS_03689112	XLOC_2714543	chr9	-	1	136283382	414
TCONS_03681653	XLOC_2714708	chr9	-	3	140,352,737,140,353,000,000,000,000	264,79,52
TCONS_02792790	XLOC_2031420	chr5	-	3	388,199,763,882,268,000,000,000	140,128,90
TCONS_00753597	XLOC_513774	chr12	+	1	20788106	225
TCONS_02531989	XLOC_1828836	chr4	+	2	6,653,571,066,558,820	681,271
TCONS_03248971	XLOC_2397631	chr7	-	2	158,125,499,158,132,000	127,155
TCONS_01136974	XLOC_754090	chr14	-	2	2,328,449,423,290,330	166,58
TCONS_00718610	XLOC_515261	chr12	+	1	118553205	292
TCONS_01403182	XLOC_1014698	chr17	+	1	42404464	231
TCONS_00724335	XLOC_514371	chr12	+	1	56685629	414
TCONS_00101570	XLOC_008047	chr1	-	1	229478354	249
TCONS_01580377	XLOC_1094122	chr18	+	1	74580864	313
TCONS_02034198	XLOC_1229995	chr2	+	2	1,945,379,519,510,950	138,97
TCONS_01386740	XLOC_1014236	chr17	+	2	2,730,730,027,308,050	67,143
TCONS_02197006	XLOC_1584577	chr22	+	1	16319824	503
TCONS_03240316	XLOC_2217272	chr6	+	2	2,673,223,826,754,420	205,29
TCONS_00671350	XLOC_376958	chr11	+	1	118854390	339
TCONS_03468512	XLOC_2557501	chr7_gl000195_random	+	2	164,484,165,196	5,791,110
TCONS_01403570	XLOC_1015575	chr17	+	1	79843204	770
TCONS_01021153	XLOC_755292	chr14	-	2	105,925,180,105,925,000	145,101
TCONS_03483256	XLOC_2559562	chr8	+	1	145743504	298
TCONS_00021825	XLOC_006126	chr1	-	2	9,514,508,695,285,510	77,309
TCONS_00491316	XLOC_238048	chr10	-	2	7,363,817,973,638,370	172,132
TCONS_01398562	XLOC_1015856	chr17	-	3	692,041,569,226,966,000,000	292,31,111
TCONS_00320346	XLOC_006933	chr1	-	2	156,020,255,156,020,000	89,359
TCONS_00524760	XLOC_375870	chr11	+	2	6,067,466,360,676,890	91,142
TCONS_01403221	XLOC_1014791	chr17	+	1	45026208	216
TCONS_00671459	XLOC_377272	chr11	-	2	567,296,568,351	259,61
TCONS_01644091	XLOC_1175794	chr19	+	1	53324187	307
TCONS_03264906	XLOC_2393808	chr7	+	1	63185769	292
TCONS_02784691	XLOC_2032315	chr5	-	2	131,973,852,131,991,000	105,109
TCONS_03809805	XLOC_2711531	chr9	+	1	68425433	323
TCONS_01579999	XLOC_1093514	chr18	+	1	19088652	319
TCONS_02184540	XLOC_1585235	chr22	+	2	3,963,763,139,643,140	250,166
TCONS_02738682	XLOC_1828972	chr4	+	1	77803148	248
TCONS_00378719	XLOC_236864	chr10	+	1	124095647	247
TCONS_02235877	XLOC_1623987	chr3	-	1	47702964	242
TCONS_01395528	XLOC_1014823	chr17	+	2	4,600,639,946,007,020	27,232
TCONS_01940066	XLOC_1230104	chr2	+	1	26801794	306
TCONS_03691007	XLOC_2711535	chr9	+	1	69106413	383
TCONS_00325973	XLOC_237153	chr10	-	1	3361200	345
TCONS_01109421	XLOC_753936	chr14	+	1	106083061	209
TCONS_01376357	XLOC_932019	chr16	+	2	6,856,398,668,567,600	251,57
TCONS_00531140	XLOC_377559	chr11	-	4	11,853,161,118,538,800,000,000,000,000,000	140,65,39,27
TCONS_01617716	XLOC_1174810	chr19	+	2	2,421,628,024,217,320	143,118
TCONS_01056594	XLOC_753722	chr14	+	1	101078637	326
TCONS_03685364	XLOC_2711767	chr9	+	1	88637537	1255
TCONS_03825459	XLOC_2713162	chr9	-	2	3,244,872,032,451,220	116,97
TCONS_01599247	XLOC_1093617	chr18	+	2	2,618,423,126,184,380	119,145
TCONS_01672233	XLOC_1174322	chr19	+	1	10793404	343
TCONS_00833670	XLOC_515005	chr12	+	2	106,696,406,106,697,000	313,83
TCONS_01397034	XLOC_1017670	chr17	-	2	8,010,955,480,110,390	95,152
TCONS_02491003	XLOC_1625605	chr3	-	3	184,443,368,184,476,000,000,000,000	57,147,17
TCONS_01246818	XLOC_845184	chr15	+	1	23678416	269
TCONS_03485241	XLOC_2558149	chr8	+	5	2,351,236,623,512,620,000,000,000,000,000,000,000,000	133,113,98,108,149
TCONS_01375694	XLOC_930874	chr16	+	1	2801080	596
TCONS_01371265	XLOC_931651	chr16	+	1	34826541	229
TCONS_01386546	XLOC_1013789	chr17	+	1	7411877	268
TCONS_03268397	XLOC_2394517	chr7	+	2	103,122,674,103,130,000	102,488
TCONS_02785948	XLOC_2029390	chr5	+	3	661,170,976,611,808,000,000,000	70,81,76
TCONS_02576627	XLOC_1828495	chr4	+	1	33517252	261
TCONS_02001559	XLOC_1235508	chr2	-	1	171005865	219
TCONS_02488998	XLOC_1621405	chr3	+	1	44687552	405
TCONS_00756109	XLOC_515416	chr12	+	1	124274744	226
TCONS_01580337	XLOC_1094069	chr18	+	1	71002114	331
TCONS_01693465	XLOC_1175948	chr19	+	2	5,581,761,455,820,000	204,30
TCONS_01617733	XLOC_1174842	chr19	+	1	28794630	303
TCONS_02253464	XLOC_1624275	chr3	-	2	5,795,828,157,960,650	138,100
TCONS_03268893	XLOC_2395810	chr7	-	4	32,756,763,327,587,400,000,000,000,000,000	41,58,111,42
TCONS_00687810	XLOC_378709	chr11	-	2	8,548,254,885,484,390	149,153
TCONS_00537545	XLOC_378206	chr11	-	1	62766721	287
TCONS_03838059	XLOC_2834725	chr9_gl000199_random	-	3	93,862,111,506,159,200	130,85,201
TCONS_01303248	XLOC_931977	chr16	+	1	67459546	420
TCONS_01671973	XLOC_1173881	chr19	+	1	246686	303
TCONS_00513542	XLOC_376093	chr11	+	2	6,573,481,665,734,940	38,261
TCONS_03988833	XLOC_2839027	chrX	+	1	57684558	238
TCONS_00536476	XLOC_375947	chr11	+	1	62732624	219
TCONS_00034861	XLOC_000300	chr1	+	3	998,130,199,902,019,000,000	101,66,95
TCONS_01741469	XLOC_1232554	chr2	+	1	209145222	241
TCONS_00379723	XLOC_237634	chr10	-	1	42766368	368
TCONS_03788578	XLOC_2713587	chr9	-	1	74632230	212
TCONS_00713678	XLOC_516638	chr12	-	2	5,779,189,257,824,500	93,149
TCONS_01029521	XLOC_753009	chr14	+	2	5,231,388,352,340,590	213,56
TCONS_03178469	XLOC_2218180	chr6	+	1	98475137	236
TCONS_01730783	XLOC_1230520	chr2	+	2	5,577,538,255,775,780	143,86
TCONS_01131788	XLOC_754346	chr14	-	2	4,254,006,542,540,170	84,175
TCONS_00756576	XLOC_515758	chr12	-	1	6602776	386
TCONS_03680119	XLOC_2711054	chr9	+	2	1,233,402,512,340,750	109,112
TCONS_01267371	XLOC_931286	chr16	+	1	22530395	523
TCONS_01126019	XLOC_753603	chr14	+	1	94580837	322
TCONS_03034137	XLOC_2218058	chr6	+	2	8,468,637,784,687,170	60,203
TCONS_00498860	XLOC_237090	chr10	-	2	961,396,964,084	29,178
TCONS_01020385	XLOC_752658	chr14	+	1	23701184	234
TCONS_03654693	XLOC_2559589	chr8	-	3	255,186,256,164,256,000	345,95,39
TCONS_02314043	XLOC_1623520	chr3	-	2	1,016,372,510,192,810	130,128
TCONS_00319387	XLOC_000608	chr1	+	2	2,116,835,121,168,380	15,268
TCONS_00378450	XLOC_236666	chr10	+	1	112296425	252
TCONS_02051214	XLOC_1483315	chr20	+	1	34589897	295
TCONS_00032929	XLOC_008343	chr1	-	3	248,648,727,248,662,000,000,000,000	58,83,86
TCONS_02267964	XLOC_1623535	chr3	-	1	11123118	342
TCONS_00859108	XLOC_516493	chr12	-	2	5,343,769,253,439,370	1278,51
TCONS_02578423	XLOC_1829611	chr4	+	1	145639548	277
TCONS_02576271	XLOC_1828219	chr4	+	1	6828522	266
TCONS_01283976	XLOC_931405	chr16	+	1	28786173	522
TCONS_02785947	XLOC_2029390	chr5	+	4	66,091,157,660,922,700,000,000,000,000,000	21,111,81,131
TCONS_01387071	XLOC_1015056	chr17	+	1	57447631	202
TCONS_01619057	XLOC_1177153	chr19	-	2	3,491,714,534,919,020	161,78
TCONS_00923021	XLOC_650971	chr13	+	1	57713991	205
TCONS_02187271	XLOC_1586027	chr22	-	3	323,540,793,235,721,000,000,000	117,119,12
TCONS_03900006	XLOC_2840976	chrX	-	2	102,565,204,102,565,000	157,186
TCONS_00923467	XLOC_651326	chr13	+	1	100797090	426
TCONS_03683019	XLOC_2712707	chr9	+	2	138,054,725,138,055,000	95,120
TCONS_00226279	XLOC_000193	chr1	+	1	4847188	311
TCONS_01730858	XLOC_1230649	chr2	+	3	661,030,526,610,377,000,000,000	43,170,24
TCONS_01644782	XLOC_1176377	chr19	-	2	63,928,636,392,994	51,308
TCONS_01000001	XLOC_651516	chr13	+	2	113,951,539,113,959,000	271,128
TCONS_00040268	XLOC_000025	chr1	+	1	851385	302
TCONS_01689026	XLOC_1174825	chr19	+	1	27842191	319
TCONS_03646667	XLOC_2560952	chr8	-	1	109316448	319
TCONS_02255061	XLOC_1620986	chr3	+	4	12,343,042,123,434,200,000,000,000,000,000	118,115,106,17
TCONS_02944264	XLOC_2032081	chr5	-	1	106104818	226
TCONS_01423789	XLOC_1014389	chr17	+	1	34044546	232
TCONS_01630934	XLOC_1176580	chr19	-	2	1,147,749,611,478,060	257,112
TCONS_02792491	XLOC_2030492	chr5	+	2	149,932,177,149,932,000	154,807
TCONS_01136333	XLOC_752765	chr14	+	2	3,224,332,232,244,930	140,76
TCONS_03481152	XLOC_2559033	chr8	+	2	9,926,710,999,294,100	90,162
TCONS_03843139	XLOC_2837193	chrUn_gl000225	+	3	255,448,183,687,534	186,46,38
TCONS_00514436	XLOC_379103	chr11	-	2	117,796,857,117,797,000	27,243
TCONS_00670581	XLOC_374955	chr11	+	3	705,362,706,140,706,000	92,148,130
TCONS_04023858	XLOC_2840443	chrX	-	1	48874773	210
TCONS_00645283	XLOC_375277	chr11	+	1	14282449	274
TCONS_02143311	XLOC_1547220	chr21	+	2	3,896,164,038,961,980	65,241
TCONS_02065317	XLOC_1483407	chr20	+	1	39387477	747
TCONS_03824476	XLOC_2711195	chr9	+	2	2,776,153,727,762,920	80,153
TCONS_00524432	XLOC_375040	chr11	+	2	32,215,103,222,417	165,140
TCONS_01018158	XLOC_652517	chr13	-	2	110,141,246,110,141,000	142,214
TCONS_02067164	XLOC_1484751	chr20	-	1	50132989	273
TCONS_02768755	XLOC_2028369	chr4_gl000194_random	+	1	27272	427
TCONS_01384496	XLOC_932577	chr16	-	2	14,138,061,416,018	450,116
TCONS_03010982	XLOC_2032190	chr5	-	1	119073874	295
TCONS_02489753	XLOC_1622923	chr3	+	3	170,130,621,170,130,000,000,000,000	99,87,71
TCONS_02235055	XLOC_1621288	chr3	+	1	38104321	348
TCONS_03077457	XLOC_2217654	chr6	+	1	43496726	319
TCONS_02128976	XLOC_1547356	chr21	+	1	45539958	245
TCONS_00491137	XLOC_237009	chr10	+	1	133947927	330
TCONS_01630693	XLOC_1176063	chr19	+	1	58442185	271
TCONS_01108697	XLOC_752678	chr14	+	1	24299822	335
TCONS_03248365	XLOC_2395293	chr7	+	2	157,850,742,157,852,000	169,72
TCONS_02313465	XLOC_1623090	chr3	+	1	183340892	240
TCONS_02117831	XLOC_1482818	chr20	+	1	2582062	327
TCONS_02225009	XLOC_1586417	chr22	-	1	47417368	375
TCONS_02693139	XLOC_1828318	chr4	+	1	11021140	297
TCONS_03862327	XLOC_2838592	chrX	+	1	19006951	426
TCONS_02729079	XLOC_1829286	chr4	+	1	111306836	224
TCONS_01020766	XLOC_753908	chr14	+	1	105393614	223
TCONS_01396957	XLOC_1017564	chr17	-	2	7,701,564,677,023,450	52,229
TCONS_02113708	XLOC_1483936	chr20	-	2	16,782,931,682,277	132,77
TCONS_00513748	XLOC_376770	chr11	+	2	107,861,856,107,862,000	90,134
TCONS_03844328	XLOC_2837916	chrUn_gl000237	+	1	13180	396
TCONS_01624060	XLOC_1176048	chr19	+	2	5,794,668,957,949,460	272,262
TCONS_01624539	XLOC_1176936	chr19	-	3	202,874,942,034,909,000,000,000	124,263,674
TCONS_00533266	XLOC_375901	chr11	+	1	61376813	209
TCONS_00029710	XLOC_000974	chr1	+	2	3,381,562,933,831,210	419,11
TCONS_02479138	XLOC_1624971	chr3	-	1	133163880	202
TCONS_00271731	XLOC_004283	chr1	+	1	247499684	204
TCONS_01384360	XLOC_931704	chr16	+	1	48641503	314
TCONS_03034178	XLOC_2218161	chr6	+	2	9,602,596,096,034,270	227,40
TCONS_01737466	XLOC_1236473	chr2	-	2	242,107,087,242,120,000	65,150
TCONS_00325515	XLOC_235721	chr10	+	1	51292000	209
TCONS_03899169	XLOC_2840268	chrX	-	2	3,081,321,130,813,530	268,65
TCONS_02197609	XLOC_1584975	chr22	+	1	29626375	301
TCONS_02529632	XLOC_1829352	chr4	+	1	119187182	329
TCONS_00714862	XLOC_513358	chr12	+	2	11,928,541,201,640	79,131
TCONS_00833162	XLOC_514070	chr12	+	1	48606737	205
TCONS_01146600	XLOC_846329	chr15	+	1	84907576	401
TCONS_02132130	XLOC_1547534	chr21	-	3	149,555,741,495,592,000,000,000	29,128,138
TCONS_03691444	XLOC_2712385	chr9	+	1	127963451	225
TCONS_03309925	XLOC_2394087	chr7	+	1	75401871	587
TCONS_00833972	XLOC_515491	chr12	+	1	128597843	201
TCONS_01276850	XLOC_930843	chr16	+	2	24,111,242,411,455	77,126
TCONS_01684806	XLOC_1177361	chr19	-	1	39893871	330
TCONS_00686113	XLOC_375157	chr11	+	1	7675553	202
TCONS_01611850	XLOC_1175393	chr19	+	1	45246029	244
TCONS_01796081	XLOC_1231691	chr2	+	1	132996806	208
TCONS_00376999	XLOC_235696	chr10	+	2	4,991,690,349,917,480	263,20
TCONS_01621989	XLOC_1177896	chr19	-	1	52562921	287
TCONS_02579892	XLOC_1830762	chr4	-	1	49314437	238
TCONS_01146635	XLOC_846448	chr15	+	1	90781040	229
TCONS_03217775	XLOC_2216867	chr6	+	1	3257280	267
TCONS_02579462	XLOC_1830391	chr4	-	2	1,045,636,110,458,940	251,68
TCONS_01032158	XLOC_754339	chr14	-	2	3,993,952,039,943,850	333,70
TCONS_00345766	XLOC_238882	chr10	-	3	130,458,916,130,487,000,000,000,000	371,192,157
TCONS_01108912	XLOC_753114	chr14	+	1	58874728	284
TCONS_01469080	XLOC_1015755	chr17	-	2	36,180,853,619,981	151,245
TCONS_03033642	XLOC_2217008	chr6	+	5	1,065,980,710,672,940,000,000,000,000,000,000,000,000	32,112,152,102,67
TCONS_03611341	XLOC_2559512	chr8	+	1	144821715	236
TCONS_00034851	XLOC_000279	chr1	+	1	9253250	347
TCONS_01398800	XLOC_1016506	chr17	-	4	35,685,703,356,871,100,000,000,000,000,000	222,163,31,234
TCONS_01375780	XLOC_931000	chr16	+	3	894,822,389,488,908,000,000	80,184,91
TCONS_03862539	XLOC_2839347	chrX	+	1	100096245	813
TCONS_01631499	XLOC_1178045	chr19	-	1	55760217	446
TCONS_01941917	XLOC_1233448	chr2	-	3	198,015,771,984,451,000,000,000	65,102,109
TCONS_01301533	XLOC_930842	chr16	+	1	2365906	346
TCONS_02065279	XLOC_1483377	chr20	+	2	3,723,072,037,252,000	2,207
TCONS_01731722	XLOC_1232532	chr2	+	6	207,705,859,207,728,000,000,000,000,000,000,000,000,000,000,000,000,000	96,149,281,167,137,22
TCONS_00299881	XLOC_003297	chr1	+	3	184,780,032,184,781,000,000,000,000	84,76,82
TCONS_01735590	XLOC_1231110	chr2	+	2	9,687,461,196,905,450	106,243
TCONS_00875576	XLOC_517366	chr12	-	2	116,249,099,116,257,000	51,152
TCONS_00339589	XLOC_236296	chr10	+	1	92863321	304
TCONS_02051409	XLOC_1483630	chr20	+	1	49599176	207
TCONS_02230536	XLOC_1585987	chr22	-	2	3,099,993,931,001,440	150,54
TCONS_02199393	XLOC_1586497	chr22	-	2	5,074,260,450,743,240	311,101
TCONS_01535583	XLOC_1094575	chr18	-	1	29868525	207
TCONS_00646725	XLOC_378016	chr11	-	1	50769727	336
TCONS_01349507	XLOC_932321	chr16	+	1	84900283	217
TCONS_00347509	XLOC_235611	chr10	+	1	43936942	223
TCONS_03989319	XLOC_2839932	chrX	+	1	153122814	330
TCONS_01623045	XLOC_1174142	chr19	+	2	61,910,856,192,678	30,347
TCONS_01794877	XLOC_1230908	chr2	+	1	85040420	306
TCONS_03896994	XLOC_2838685	chrX	+	1	30071346	441
TCONS_01513929	XLOC_1094111	chr18	+	2	7,420,350,374,204,130	142,98
TCONS_00701926	XLOC_515187	chr12	+	1	113711493	291
TCONS_00571009	XLOC_379330	chr11	-	1	130691225	206
TCONS_01156307	XLOC_846272	chr15	+	3	827,068,768,270,773,000,000,000	133,148,40
TCONS_01398810	XLOC_1016547	chr17	-	2	3,685,975,536,862,300	255,14
TCONS_01490067	XLOC_1014391	chr17	+	2	3,406,731,934,068,050	233,1
TCONS_03248371	XLOC_2395337	chr7	+	1	159019678	483
TCONS_01055792	XLOC_753249	chr14	+	1	67290135	853
TCONS_01033935	XLOC_754261	chr14	-	2	3,502,349,435,023,910	119,204
TCONS_02526859	XLOC_1830223	chr4	-	2	24,660,952,470,126	344,36
TCONS_01512941	XLOC_1093855	chr18	+	2	5,179,620,251,797,720	200,25
TCONS_02769520	XLOC_2030646	chr5	+	1	161318152	303
TCONS_00285772	XLOC_000630	chr1	+	2	2,196,420,721,964,710	183,63
TCONS_02254078	XLOC_1625853	chr3	-	2	197,686,516,197,686,000	74,165
TCONS_03788306	XLOC_2712840	chr9	+	1	141107183	206
TCONS_02791889	XLOC_2028885	chr5	+	2	1,488,967,914,892,470	74,149
TCONS_02180629	XLOC_1584730	chr22	+	2	2,070,989,920,712,890	18,194
TCONS_01275962	XLOC_933579	chr16	-	2	5,431,749,354,318,150	159,126
TCONS_00753119	XLOC_513469	chr12	+	1	5996896	209
TCONS_01278038	XLOC_933921	chr16	-	2	7,437,271,374,378,670	79,129
TCONS_03433385	XLOC_2395325	chr7	+	1	158740477	409
TCONS_02101349	XLOC_1482997	chr20	+	1	15128394	340
TCONS_01285227	XLOC_933915	chr16	-	2	7,372,385,673,729,220	46,170
TCONS_01267726	XLOC_932190	chr16	+	1	76556257	212
TCONS_01727160	XLOC_1233308	chr2	-	3	904,874,990,987,509,000,000	54,21,234
TCONS_01627605	XLOC_1176722	chr19	-	2	1,463,842,914,640,020	193,86
TCONS_00455984	XLOC_235051	chr10	+	1	4966100	209
TCONS_00482216	XLOC_237874	chr10	-	1	60626683	311
TCONS_02224618	XLOC_1585462	chr22	+	1	46721818	230
TCONS_03688520	XLOC_2712918	chr9	-	2	53,078,915,326,222	377,228
TCONS_01371454	XLOC_932422	chr16	+	1	88776879	224
TCONS_00754729	XLOC_514498	chr12	+	1	65571777	276
TCONS_01384754	XLOC_934197	chr16	-	1	89250949	268
TCONS_01018112	XLOC_652074	chr13	-	1	52940959	225
TCONS_02534656	XLOC_1828344	chr4	+	2	1,501,890,115,034,780	1,203
TCONS_02046834	XLOC_1483045	chr20	+	2	1,854,810,318,549,270	137,81
TCONS_01402842	XLOC_1013783	chr17	+	2	73,663,997,366,721	106,106
TCONS_00565853	XLOC_375476	chr11	+	1	31613030	221
TCONS_00031514	XLOC_004921	chr1	-	2	2,333,759,023,340,370	111,291
TCONS_03845438	XLOC_2839158	chrX	+	1	71798164	334
TCONS_00698013	XLOC_376217	chr11	+	1	68708108	518
TCONS_03272499	XLOC_2397392	chr7	-	2	143,949,349,143,951,000	236,462
TCONS_00536947	XLOC_376871	chr11	+	1	113992555	269
TCONS_00025028	XLOC_002650	chr1	+	2	152,188,588,152,190,000	141,143
TCONS_01621679	XLOC_1177068	chr19	-	2	2,828,390,928,284,430	231,380
TCONS_02015619	XLOC_1233299	chr2	-	3	871,123,687,115,458,000,000	227,131,19
TCONS_02216939	XLOC_1584678	chr22	+	1	19354437	267
TCONS_03789096	XLOC_2714674	chr9	-	1	139999227	226
TCONS_01279173	XLOC_931094	chr16	+	2	1,354,493,013,546,150	100,104
TCONS_02478276	XLOC_1621025	chr3	+	1	14342782	300
TCONS_00272160	XLOC_005224	chr1	-	2	3,584,234,335,842,750	32,272
TCONS_03490994	XLOC_2559763	chr8	-	1	8510071	227
TCONS_00570255	XLOC_378720	chr11	-	2	8,630,413,886,306,550	90,157
TCONS_03638276	XLOC_2558585	chr8	+	2	5,812,069,858,121,170	65,475
TCONS_03274364	XLOC_2393108	chr7	+	1	6770980	242
TCONS_01423011	XLOC_1013873	chr17	+	1	10665310	433
TCONS_01162766	XLOC_845764	chr15	+	1	55612852	206
TCONS_01516495	XLOC_1094886	chr18	-	1	61352030	406
TCONS_01795745	XLOC_1231484	chr2	+	1	119310768	248
TCONS_03036973	XLOC_2217821	chr6	+	1	56920581	216
TCONS_00534233	XLOC_378454	chr11	-	2	6,946,793,869,468,920	149,149
TCONS_00536493	XLOC_375984	chr11	+	1	63745147	334
TCONS_01737005	XLOC_1235237	chr2	-	3	148,147,356,148,148,000,000,000,000	43,117,63
TCONS_03687905	XLOC_2711376	chr9	+	1	38462243	302
TCONS_04023642	XLOC_2839001	chrX	+	3	559,352,105,601,612,000,000,000	23,158,47
TCONS_03028329	XLOC_2217008	chr6	+	2	1,067,298,010,681,730	81,191
TCONS_00896294	XLOC_651308	chr13	+	2	9,995,760,999,960,930	107,105
TCONS_03485732	XLOC_2559299	chr8	+	3	127,601,508,127,604,000,000,000,000	27,145,98
TCONS_00378350	XLOC_236599	chr10	+	1	105190855	279
TCONS_01020484	XLOC_752985	chr14	+	2	5,085,659,450,856,760	135,97
TCONS_01617709	XLOC_1174801	chr19	+	2	2,396,119,223,962,590	101,171
TCONS_01376610	XLOC_932473	chr16	+	2	8,971,506,989,715,360	159,87
TCONS_03666876	XLOC_2561419	chr8	-	1	145887608	250
TCONS_00671998	XLOC_378719	chr11	-	1	86199247	205
TCONS_03309593	XLOC_2393787	chr7	+	2	6,202,569,462,035,470	51,294
TCONS_01797517	XLOC_1232562	chr2	+	1	209328720	238
TCONS_02527386	XLOC_1832045	chr4	-	2	184,825,504,184,825,000	176,26
TCONS_03858648	XLOC_2838655	chrX	+	2	2,527,485,025,295,810	105,110
TCONS_01642075	XLOC_1174283	chr19	+	1	9758041	476
TCONS_00671867	XLOC_378376	chr11	-	2	6,657,588,666,584,360	190,28
TCONS_02045877	XLOC_1483662	chr20	+	1	52553669	232
TCONS_03265019	XLOC_2394122	chr7	+	2	7,631,393,276,316,440	35,179
TCONS_03989101	XLOC_2839548	chrX	+	1	117676988	282
TCONS_01726209	XLOC_1230855	chr2	+	3	761,474,967,614,778,000,000,000	109,61,63
TCONS_03028811	XLOC_2218189	chr6	+	2	9,987,335,699,880,890	418,97
TCONS_03433065	XLOC_2394472	chr7	+	1	101745841	445
TCONS_01021044	XLOC_754893	chr14	-	2	7,740,726,977,407,370	81,124
TCONS_03076575	XLOC_2217003	chr6	+	2	1,045,731,210,483,020	168,134
TCONS_00456467	XLOC_235986	chr10	+	1	73929085	361
TCONS_02784064	XLOC_2030586	chr5	+	1	157086710	617
TCONS_01396176	XLOC_1015928	chr17	-	2	81,911,008,192,268	650,52
TCONS_01646068	XLOC_1177430	chr19	-	1	41902775	260
TCONS_00755538	XLOC_515014	chr12	+	1	106904520	267
TCONS_02236059	XLOC_1624554	chr3	-	1	100169368	220
TCONS_00456421	XLOC_235924	chr10	+	1	71029871	212
TCONS_00325648	XLOC_236122	chr10	+	1	81597761	310
TCONS_01253026	XLOC_846558	chr15	+	2	9,661,774,096,643,650	194,21
TCONS_03683205	XLOC_2713193	chr9	-	2	3,361,811,033,629,510	138,90
TCONS_01376987	XLOC_933142	chr16	-	3	267,892,932,681,492,000,000,000	148,96,65
TCONS_00697862	XLOC_375290	chr11	+	1	15136998	220
TCONS_02185812	XLOC_1585578	chr22	-	2	1,624,270,216,244,600	134,179
TCONS_02016432	XLOC_1235320	chr2	-	2	155,547,500,155,554,000	160,53
TCONS_03481129	XLOC_2558975	chr8	+	2	9,596,185,295,970,220	735,158
TCONS_01280464	XLOC_934126	chr16	-	2	8,675,451,186,755,370	95,189
TCONS_00514461	XLOC_379173	chr11	-	1	120051377	236
TCONS_03522102	XLOC_2558027	chr8	+	2	1,682,465,016,825,060	247,30
TCONS_02216959	XLOC_1584726	chr22	+	1	20679344	299
TCONS_01267402	XLOC_931355	chr16	+	1	25666787	370
TCONS_02578760	XLOC_1829841	chr4	+	1	166510778	349
TCONS_00101101	XLOC_007720	chr1	-	1	207113513	271
TCONS_00568161	XLOC_377050	chr11	+	1	123229563	231
TCONS_03654403	XLOC_2558977	chr8	+	1	95998451	271
TCONS_00701390	XLOC_513546	chr12	+	1	7434480	541
TCONS_02786830	XLOC_2031858	chr5	-	1	79713846	300
TCONS_02174194	XLOC_1546903	chr21	+	2	1,435,828,814,358,580	121,207
TCONS_03988970	XLOC_2839340	chrX	+	1	99408215	208
TCONS_02943628	XLOC_2030682	chr5	+	1	167798581	283
TCONS_01017951	XLOC_650777	chr13	+	1	44282976	267
TCONS_00035765	XLOC_002648	chr1	+	2	152,223,238,152,224,000	149,92
TCONS_01684714	XLOC_1177184	chr19	-	1	35904622	455
TCONS_00757101	XLOC_516112	chr12	-	1	30866884	202
TCONS_01280437	XLOC_934031	chr16	-	2	8,147,765,281,477,990	254,20
TCONS_01620699	XLOC_1174889	chr19	+	3	325,168,303,252,845,000,000,000	83,158,131
TCONS_02113643	XLOC_1483819	chr20	+	1	61291125	303
TCONS_02034200	XLOC_1230034	chr2	+	1	22011046	305
TCONS_03031167	XLOC_2218149	chr6	+	2	9,416,436,094,172,990	170,204
TCONS_00716069	XLOC_516491	chr12	-	3	533,404,595,334,323,000,000,000	2,153,123,120
TCONS_03844252	XLOC_2837890	chrUn_gl000236	+	1	23856	352
TCONS_03843155	XLOC_2837230	chrUn_gl000225	-	3	222,595,180,057,191	74,116,67
TCONS_01406010	XLOC_1014609	chr17	+	1	40601834	251
TCONS_00687545	XLOC_378129	chr11	-	2	6,060,138,560,610,080	122,117
TCONS_03863071	XLOC_2840987	chrX	-	2	103,020,048,103,021,000	34,215
TCONS_01502954	XLOC_1017273	chr17	-	1	64794653	611
TCONS_03654084	XLOC_2558314	chr8	+	3	351,299,703,513,196,000,000,000	63,228,10
TCONS_03217941	XLOC_2217603	chr6	+	1	42611574	292
TCONS_03209770	XLOC_2219088	chr6	+	2	168,758,105,168,758,000	51,227
TCONS_02225010	XLOC_1586423	chr22	-	2	4,800,364,648,003,840	94,191
TCONS_03864487	XLOC_2838655	chrX	+	1	25274789	294
TCONS_03029124	XLOC_2219090	chr6	+	2	168,790,181,168,793,000	231,69
TCONS_01800230	XLOC_1234531	chr2	-	2	9,188,237,791,890,170	539,32
TCONS_02189496	XLOC_1585220	chr22	+	1	39389111	282
TCONS_02040095	XLOC_1482956	chr20	+	2	1,062,554,110,626,070	38,246
TCONS_00866995	XLOC_515588	chr12	+	1	133128902	212
TCONS_01484269	XLOC_1015503	chr17	+	1	78084848	224
TCONS_00376568	XLOC_235392	chr10	+	1	29062430	209
TCONS_02749799	XLOC_1829892	chr4	+	1	173950870	221
TCONS_03897407	XLOC_2838995	chrX	+	1	55516354	334
TCONS_01395545	XLOC_1014863	chr17	+	1	46944362	554
TCONS_01247095	XLOC_845979	chr15	+	1	68116393	315
TCONS_04045265	XLOC_2993593	chrY	+	1	58994941	240
TCONS_03227207	XLOC_2218083	chr6	+	4	87,923,047,879,236,100,000,000,000,000,000	106,168,107,54
TCONS_01055700	XLOC_753197	chr14	+	1	64593581	286
TCONS_03862345	XLOC_2838657	chrX	+	3	255,859,322,583,730,000,000,000	134,97,42
TCONS_03525723	XLOC_2560651	chr8	-	1	86557466	438
TCONS_01247423	XLOC_846674	chr15	-	2	2,054,410,420,544,670	396,22
TCONS_02536492	XLOC_1832016	chr4	-	1	183336008	279
TCONS_01641609	XLOC_1173911	chr19	+	1	798137	384
TCONS_00342463	XLOC_236569	chr10	+	2	104,210,661,104,215,000	124,295
TCONS_03433799	XLOC_2396805	chr7	-	2	100,637,606,100,642,000	91,124
TCONS_02739008	XLOC_1830634	chr4	-	2	4,077,179,340,772,800	173,53
TCONS_03490645	XLOC_2559025	chr8	+	1	99077514	321
TCONS_02174329	XLOC_1547455	chr21	+	2	4,759,188,247,592,070	128,99
TCONS_01156571	XLOC_847029	chr15	-	2	4,112,822,741,136,370	253,258
TCONS_03032048	XLOC_2220913	chr6	-	2	139,617,952,139,644,000	69,191
TCONS_01516202	XLOC_1093877	chr18	+	1	54265087	659
TCONS_00339365	XLOC_235637	chr10	+	2	4,564,706,745,647,380	75,215
TCONS_02255053	XLOC_1620966	chr3	+	3	108,091,451,080,951,000,000,000	115,119,15
TCONS_01643131	XLOC_1175096	chr19	+	1	37763600	288
TCONS_00759141	XLOC_517574	chr12	-	1	125433704	731
TCONS_00536854	XLOC_376685	chr11	+	1	97091671	226
TCONS_03896973	XLOC_2838670	chrX	+	2	2,684,925,626,861,150	203,34
TCONS_01611911	XLOC_1175519	chr19	+	1	48199249	246
TCONS_03433381	XLOC_2395317	chr7	+	1	158501644	244
TCONS_03717196	XLOC_2711379	chr9	+	1	38503683	221
TCONS_03841913	XLOC_2836592	chrUn_gl000221	-	2	120,711,150,855	20,256
TCONS_01131538	XLOC_753319	chr14	+	1	71866667	298
TCONS_03864538	XLOC_2838765	chrX	+	1	41073487	333
TCONS_03690695	XLOC_2710946	chr9	+	1	2058606	302
TCONS_01630127	XLOC_1174969	chr19	+	1	35491455	221
TCONS_02040090	XLOC_1482942	chr20	+	1	10025213	307
TCONS_02065094	XLOC_1483250	chr20	+	1	32097504	239
TCONS_03685974	XLOC_2713103	chr9	-	4	23,550,775,235,525,300,000,000,000,000,000	128,196,147,40
TCONS_02128832	XLOC_1546890	chr21	+	2	1,107,276,211,090,230	17,190
TCONS_03810351	XLOC_2712752	chr9	+	2	139,583,730,139,584,000	180,24
TCONS_03034189	XLOC_2218189	chr6	+	2	9,987,344,099,878,580	334,316
TCONS_03209157	XLOC_2217003	chr6	+	1	10457335	218
TCONS_00923353	XLOC_651242	chr13	+	1	95248537	204
TCONS_01425432	XLOC_1015454	chr17	+	1	76068220	350
TCONS_01603853	XLOC_1094598	chr18	-	1	32828429	714
TCONS_00090471	XLOC_000080	chr1	+	1	1493649	299
TCONS_00715397	XLOC_514803	chr12	+	1	93976361	291
TCONS_03900249	XLOC_2841175	chrX	-	1	123615085	203
TCONS_01423093	XLOC_1013921	chr17	+	1	13409437	501
TCONS_01055901	XLOC_753314	chr14	+	1	71569259	235
TCONS_03269554	XLOC_2397323	chr7	-	2	140,218,287,140,219,000	251,190
TCONS_00701983	XLOC_515374	chr12	+	1	123046058	250
TCONS_03469522	XLOC_2561314	chr8	-	1	143191873	279
TCONS_01401174	XLOC_1015853	chr17	-	3	685,387,968,599,066,000,000	264,110,29
TCONS_01502767	XLOC_1016186	chr17	-	1	19553609	291
TCONS_02488938	XLOC_1621311	chr3	+	1	39151645	355
TCONS_03469332	XLOC_2560481	chr8	-	1	67561581	254
TCONS_00754930	XLOC_514619	chr12	+	1	75888564	222
TCONS_02526097	XLOC_1828098	chr4	+	2	18,939,321,895,456	58,182
TCONS_02227913	XLOC_1585759	chr22	-	2	2,227,874,122,279,510	151,101
TCONS_03028268	XLOC_2216818	chr6	+	1	2307305	268
TCONS_00867291	XLOC_517088	chr12	-	2	9,903,209,399,032,670	208,106
TCONS_03522251	XLOC_2558108	chr8	+	1	22065097	377
TCONS_01162495	XLOC_845341	chr15	+	1	31007912	226
TCONS_00715475	XLOC_514939	chr12	+	2	102,698,452,102,709,000	82,154
TCONS_02792416	XLOC_2030344	chr5	+	1	140704407	354
TCONS_00724925	XLOC_515430	chr12	+	1	124805033	204
TCONS_00319314	XLOC_000127	chr1	+	2	25,916,212,596,371	134,108
TCONS_01672035	XLOC_1173969	chr19	+	1	1564806	207
TCONS_01033219	XLOC_752531	chr14	+	1	19633576	2444
TCONS_01513975	XLOC_1094238	chr18	-	2	26,532,402,655,415	61,161
TCONS_03610667	XLOC_2558249	chr8	+	1	30078141	210
TCONS_00025751	XLOC_004618	chr1	-	3	99,966,591,000,268,100,000,000	26,159,40
TCONS_00024317	XLOC_000974	chr1	+	2	3,381,582,333,828,660	225,18
TCONS_02165379	XLOC_1548109	chr21	-	1	47684218	215
TCONS_00897147	XLOC_650591	chr13	+	3	304,327,773,043,615,000,000,000	89,114,77
TCONS_01184413	XLOC_847430	chr15	-	1	62747549	299
TCONS_00513925	XLOC_377245	chr11	+	2	134,916,777,134,916,000	33,265
TCONS_01797027	XLOC_1232264	chr2	+	1	187382289	355
TCONS_01275395	XLOC_932313	chr16	+	1	84682400	276
TCONS_00712921	XLOC_515004	chr12	+	2	106,642,328,106,643,000	209,59
TCONS_03845371	XLOC_2839035	chrX	+	2	5,856,375,958,567,940	69,171
TCONS_03682352	XLOC_2711024	chr9	+	1	6422710	234
TCONS_01941572	XLOC_1232751	chr2	+	1	220658532	205
TCONS_01230691	XLOC_845315	chr15	+	1	30378515	259
TCONS_02065675	XLOC_1483620	chr20	+	1	49198938	205
TCONS_01302759	XLOC_931696	chr16	+	1	48000911	209
TCONS_00301811	XLOC_007456	chr1	-	3	184,634,191,184,638,000,000,000,000	89,303,58
TCONS_01302112	XLOC_931237	chr16	+	1	21194086	307
TCONS_01467808	XLOC_1013803	chr17	+	1	7724791	341
TCONS_01158648	XLOC_846759	chr15	-	3	238,319,592,383,303,000,000,000	106,76,54
TCONS_00567772	XLOC_376837	chr11	+	1	111968501	362
TCONS_02253412	XLOC_1624166	chr3	-	3	523,168,675,231,854,000,000,000	80,64,86
TCONS_01303254	XLOC_931980	chr16	+	2	6,752,590,667,538,320	118,83
TCONS_01247039	XLOC_845826	chr15	+	1	59664177	438
TCONS_01603570	XLOC_1093932	chr18	+	1	56749940	220
TCONS_00723761	XLOC_513337	chr12	+	1	527896	207
TCONS_01673793	XLOC_1177114	chr19	-	3	324,352,873,245,673,000,000,000	54,91,70
TCONS_02795941	XLOC_2030586	chr5	+	1	157085009	228
TCONS_00754457	XLOC_514353	chr12	+	2	5,649,349,756,493,620	32,319
TCONS_01692768	XLOC_1174741	chr19	+	2	2,176,928,421,779,140	412,26
TCONS_00491497	XLOC_238935	chr10	-	2	134,034,417,134,034,000	255,47
TCONS_02185929	XLOC_1585831	chr22	-	3	248,283,492,483,462,000,000,000	53,105,124
TCONS_01154506	XLOC_846295	chr15	+	1	83511282	1893
TCONS_02784624	XLOC_2032132	chr5	-	1	113800901	254
TCONS_03271076	XLOC_2393515	chr7	+	1	38355814	429
TCONS_02530062	XLOC_1830523	chr4	-	2	2,519,177,125,193,240	186,61
TCONS_03646623	XLOC_2560678	chr8	-	1	88504909	250
TCONS_02143986	XLOC_1547735	chr21	-	1	32574829	241
TCONS_01136505	XLOC_753143	chr14	+	4	60,725,715,607,266,500,000,000,000,000,000	47,77,198,25
TCONS_02164931	XLOC_1547089	chr21	+	1	33297172	278
TCONS_01018156	XLOC_652517	chr13	-	1	110141246	397
TCONS_02693380	XLOC_1828768	chr4	+	1	56829911	314
TCONS_02763332	XLOC_1828144	chr4	+	1	3246933	259
TCONS_00098019	XLOC_005305	chr1	-	2	3,870,655,138,707,170	95,150
TCONS_02769661	XLOC_2031169	chr5	-	1	11120360	217
TCONS_02784936	XLOC_2032963	chr5	-	1	177474566	238
TCONS_00320496	XLOC_007825	chr1	-	1	214543193	259
TCONS_01484074	XLOC_1015090	chr17	+	1	58733612	222
TCONS_00570938	XLOC_379281	chr11	-	1	126717275	310
TCONS_02532291	XLOC_1829717	chr4	+	1	153945147	225
TCONS_00528518	XLOC_378670	chr11	-	2	8,128,118,481,282,290	92,129
TCONS_01794417	XLOC_1230615	chr2	+	1	64291030	260
TCONS_03265240	XLOC_2394608	chr7	+	3	112,785,744,112,824,000,000,000,000	86,113,71
TCONS_01386693	XLOC_1014144	chr17	+	2	2,111,042,821,110,960	183,57
TCONS_02694200	XLOC_1830298	chr4	-	1	6414458	217
TCONS_02135238	XLOC_1547798	chr21	-	1	34985330	230
TCONS_02789729	XLOC_2030895	chr5	+	1	178384179	352
TCONS_01721880	XLOC_1229745	chr2	+	2	16,380,271,639,456	118,152
[truncated: 8,225 more rows]
